# Supplementary material for: SNRPC promotes hepatocellular carcinoma cell motility by inducing epithelial‐mesenchymal transition
Source: PubMed Central journal article supplement (PMC8167856; doi:10.1002/2211-5463.13175), 2021-05-12
Supplement: FEB4-11-1757-s002.pdf [file FEB4-11-1757-s002.pdf]

**Supplementary Table 4. Kinase enrichment of SPRNC co-expressed genes.**

| geneSet      | description                        | link                                                                                                      | ES       | NES      | P Value | FDR      | size | Leading Edge Num | leadingEdgeId                                                                                                                                                                                                                                                                              | userId                                                                                                                                                                                                                                                                        |
|--------------|------------------------------------|-----------------------------------------------------------------------------------------------------------|----------|----------|---------|----------|------|------------------|--------------------------------------------------------------------------------------------------------------------------------------------------------------------------------------------------------------------------------------------------------------------------------------------|-------------------------------------------------------------------------------------------------------------------------------------------------------------------------------------------------------------------------------------------------------------------------------|
| Kinase_CDK5  | cyclin dependent kinase 5          | <a href="https://www.ncbi.nlm.nih.gov/gene/?term=CDK5">https://www.ncbi.nlm.nih.gov/gene/?term=CDK5</a>   | -0.58361 | -1.66127 | 0       | 0.059058 | 66   | 29               | 10059;5663;54820;1809;5289;5899;23621;1499;273;11076;7498;6774;1742;5925;4846;1808;2308;120892;4780;10725;367;3091;7094;2908;5604;472;22853;9575;4205                                                                                                                                      | AMPH;AR;ATM;BACE1;CLOCK;CTNNB1;DLG4;DNM1L;DPYSL2;DPYSL3;FOXO1;HIF1A;LMTK2;LRRK2;MAP2K1;MEF2A;NDE1;NFAT5;NFE2L2;NOS3;NR3C1;PIK3C3;PSEN1;RALB;RB1;STAT3;TNLN1;TPPP;XDH                                                                                                          |
| Kinase_MAPK1 | mitogen-activated protein kinase 1 | <a href="https://www.ncbi.nlm.nih.gov/gene/?term=MAPK1">https://www.ncbi.nlm.nih.gov/gene/?term=MAPK1</a> | -0.50338 | -1.64079 | 0       | 0.064933 | 197  | 77               | 9846;3725;841;7068;6548;4089;5321;6786;23152;10018;4170;3560;1848;5610;2260;2697;3667;6615;1740;2309;1981;5142;11076;10140;2627;5782;4286;3977;9600;2932;2353;10006;5469;6774;6667;1843;4090;55294;23054;5241;2549;2002;80824;3845;9252;596;1612;4155;6654;2099;5594;81565;4040;4093;1387; | ABI1;ADAM17;AR;ATF2;BCL2;BCL2L11;CALD1;CASP8;CIC;CREBBP;DAPK1;DLG2;DUSP1;DUSP16;DUSP6;EGFR;EIF2AK2;EIF4G1;ELK1;EP300;ERG;ESR1;ETS1;FBXW7;FGFR1;FOS;FOXO3;GAB1;GAB2;GATA6;GJA1;GSK3B;GTF2I;HIF1A;IL2RB;IRS1;JUN;KLF8;KRAS;LIFR;LRP6;MAP2K1;MAPK1;MBP;MCL1;MED1;MITF;MYLK;NCOA1 |

|              |                                    |                                                                                                           |          |          |          |          |    |    |                                                                                                              |                                                                                                                                                                         |
|--------------|------------------------------------|-----------------------------------------------------------------------------------------------------------|----------|----------|----------|----------|----|----|--------------------------------------------------------------------------------------------------------------|-------------------------------------------------------------------------------------------------------------------------------------------------------------------------|
|              |                                    |                                                                                                           |          |          |          |          |    |    | 367;6196;3091;6670;1279;2078;6095;8648;5604;1956;6868;4086;4790;1386;2969;4638;9475;800;10499;2033;2113;6093 | ;NCOA2;NCOA6;NDEL1;NFKB1;PDE4B;PGR;PITPNM1;PLA2G4A;PTPN12;ROCK1;ROCK2;RORA;RPS6KA2;RPS6KA5;SLC9A1;SMAD1;SMAD4;SMAD5;SMAD9;SNAI1;SOS1;SP1;SP3;STAT3;STIM1;THRB;TOB1;TPPP |
| Kinase_MAPK7 | mitogen-activated protein kinase 7 | <a href="https://www.ncbi.nlm.nih.gov/gene/?term=MAPK7">https://www.ncbi.nlm.nih.gov/gene/?term=MAPK7</a> | -0.67973 | -1.67295 | 0.0053   | 0.065269 | 30 | 13 | 2005;4208;2353;6774;2002;6446;1612;1739;6196;3091;4790;2113;4205                                             | DAPK1;DLG1;ELK1;ELK4;ETS1;FOS;HIF1A;MEF2A;MEF2C;NFKB1;RPS6KA2;SGK1;STAT3                                                                                                |
| Kinase_MYLK  | myosin light chain kinase          | <a href="https://www.ncbi.nlm.nih.gov/gene/?term=MYLK">https://www.ncbi.nlm.nih.gov/gene/?term=MYLK</a>   | 0.846405 | 1.685046 | 0.002247 | 0.068161 | 10 | 4  | 4637;140465;103910;4636                                                                                      | MYL12B;MYL5;MYL6;MYL6B                                                                                                                                                  |
| Kinase_MYLK3 | myosin light chain kinase 3        | <a href="https://www.ncbi.nlm.nih.gov/gene/?term=MYLK3">https://www.ncbi.nlm.nih.gov/gene/?term=MYLK3</a> | 0.846405 | 1.685046 | 0.002247 | 0.068161 | 10 | 4  | 4637;140465;103910;4636                                                                                      | MYL12B;MYL5;MYL6;MYL6B                                                                                                                                                  |

|                  |                                                                |                                                                                                           |          |          |              |              |    |    |                                                                                                         |                                                                                                                              |
|------------------|----------------------------------------------------------------|-----------------------------------------------------------------------------------------------------------|----------|----------|--------------|--------------|----|----|---------------------------------------------------------------------------------------------------------|------------------------------------------------------------------------------------------------------------------------------|
|                  |                                                                | YLK3                                                                                                      |          |          |              |              |    |    |                                                                                                         |                                                                                                                              |
| Kinase_MYL<br>K4 | myosin light<br>chain kinase<br>family<br>member 4             | <a href="https://www.ncbi.nlm.nih.gov/gene/?term=MYLK4">https://www.ncbi.nlm.nih.gov/gene/?term=MYLK4</a> | 0.846405 | 1.685046 | 0.0022<br>47 | 0.068<br>161 | 10 | 4  | 4637;140465;103910;4<br>636                                                                             | MYL12B;MYL5;MYL6;<br>MYL6B                                                                                                   |
| Kinase_HCK       | HCK proto-<br>oncogene,<br>Src family<br>tyrosine<br>kinase    | <a href="https://www.ncbi.nlm.nih.gov/gene/?term=HCK">https://www.ncbi.nlm.nih.gov/gene/?term=HCK</a>     | -0.72766 | -1.6758  | 0            | 0.092<br>851 | 23 | 8  | 6777;8503;2185;5294;<br>25;2889;5290;5295                                                               | ABL1;PIK3CA;PIK3CG;P<br>IK3R1;PIK3R3;PTK2B;R<br>APGEF1;STAT5B                                                                |
| Kinase_SYK       | spleen<br>associated<br>tyrosine<br>kinase                     | <a href="https://www.ncbi.nlm.nih.gov/gene/?term=SYK">https://www.ncbi.nlm.nih.gov/gene/?term=SYK</a>     | -0.62151 | -1.57225 | 0.0147<br>87 | 0.097<br>146 | 35 | 17 | 1845;5291;118788;103<br>20;5335;1080;3937;74<br>10;23533;6622;9103;5<br>336;8503;5294;867;52<br>90;5295 | CBL;CFTR;DUSP3;FCGR<br>2C;IKZF1;LCP2;PIK3AP1<br>;PIK3CA;PIK3CB;PIK3C<br>G;PIK3R1;PIK3R3;PIK3R<br>5;PLCG1;PLCG2;SNCA;<br>VAV2 |
| Kinase_PDPK<br>1 | 3-<br>phosphoinos<br>itide<br>dependent<br>protein<br>kinase 1 | <a href="https://www.ncbi.nlm.nih.gov/gene/?term=PDPK1">https://www.ncbi.nlm.nih.gov/gene/?term=PDPK1</a> | -0.69088 | -1.58253 | 0.0154<br>74 | 0.106<br>273 | 21 | 10 | 207;6446;4217;5586;5<br>604;10000;5170;5581;<br>3690;2034                                               | AKT1;AKT3;EPAS1;ITG<br>B3;MAP2K1;MAP3K5;P<br>DPK1;PKN2;PRKCE;SG<br>K1                                                        |
| Kinase_FGR       | FGR proto-                                                     | <a href="https://www.ncbi.nlm.nih.gov/gene/?term=FGR">https://www.ncbi.nlm.nih.gov/gene/?term=FGR</a>     | -0.78127 | -1.57273 | 0.0055       | 0.106        | 12 | 5  | 8503;2185;5294;5290;                                                                                    | PIK3CA;PIK3CG;PIK3R1                                                                                                         |

|                  |                                               |                                                                   |          |          |             |              |     |    |                                                                                                                                                                                                                                                                                                                                                                                                              |                                                                                                                                                                                                                                                                                                                                                                                                                                                             |
|------------------|-----------------------------------------------|-------------------------------------------------------------------|----------|----------|-------------|--------------|-----|----|--------------------------------------------------------------------------------------------------------------------------------------------------------------------------------------------------------------------------------------------------------------------------------------------------------------------------------------------------------------------------------------------------------------|-------------------------------------------------------------------------------------------------------------------------------------------------------------------------------------------------------------------------------------------------------------------------------------------------------------------------------------------------------------------------------------------------------------------------------------------------------------|
|                  | oncogene,<br>Src family<br>tyrosine<br>kinase | ww.ncbi.<br>nlm.nih.g<br>ov/gene/<br>?term=F<br>GR                |          |          | 87          | 958          |     |    | 5295                                                                                                                                                                                                                                                                                                                                                                                                         | ;PIK3R3;PTK2B                                                                                                                                                                                                                                                                                                                                                                                                                                               |
| Kinase_MAP<br>K3 | mitogen-<br>activated<br>protein<br>kinase 3  | https://w<br>ww.ncbi.<br>nlm.nih.g<br>ov/gene/<br>?term=M<br>APK3 | -0.49467 | -1.58325 | 0.0017<br>3 | 0.120<br>012 | 171 | 66 | 9846;3725;841;7068;4<br>089;860;23152;10018;<br>4170;3560;1848;4843;<br>2260;2697;3667;2309;<br>1981;10140;2627;5782<br>;4286;3977;2932;2353;<br>10006;5469;83861;677<br>4;6667;4090;55294;52<br>41;2002;5868;3845;92<br>52;9031;596;1612;415<br>5;2099;6886;4040;409<br>3;1387;367;6196;3091;<br>6670;2908;8648;5604;<br>54700;1956;6868;9282<br>;4086;4790;1386;2969;<br>4638;9475;800;10499;<br>2113;6093 | ABI1;ADAM17;AR;ATF2<br>;BAZ1B;BCL2;BCL2L11;<br>CALD1;CASP8;CIC;CRE<br>BBP;DAPK1;DUSP6;EGF<br>R;EIF4G1;ELK1;ESR1;E<br>TS1;FBXW7;FGFR1;FOS<br>;FOXO3;GAB2;GATA6;G<br>JA1;GSK3B;GTF2I;HIF1<br>A;IL2RB;IRS1;JUN;KRA<br>S;LIFR;LRP6;MAP2K1;M<br>BP;MCL1;MED1;MED14;<br>MITF;MYLK;NCOA1;NC<br>OA2;NFKB1;NOS2;NR3<br>C1;PGR;PTPN12;RAB5A;<br>ROCK1;ROCK2;RPS6KA<br>2;RPS6KA5;RRN3;RSPH<br>3;RUNX2;SMAD1;SMAD<br>4;SMAD5;SMAD9;SP1;S<br>P3;STAT3;TAL1;THRB;T<br>OB1 |
| Kinase_EGFR      | epidermal                                     | https://w                                                         | -0.64492 | -1.69938 | 0.0018      | 0.123        | 46  | 26 | 10013;7410;6004;9052                                                                                                                                                                                                                                                                                                                                                                                         | ABCA1;ANXA1;ATM;CB                                                                                                                                                                                                                                                                                                                                                                                                                                          |

|               |                                                               |                                                |          |          |          |          |    |    |  |                                                                                                                |                                                                                                                                      |
|---------------|---------------------------------------------------------------|------------------------------------------------|----------|----------|----------|----------|----|----|--|----------------------------------------------------------------------------------------------------------------|--------------------------------------------------------------------------------------------------------------------------------------|
|               | growth factor receptor                                        | ww.ncbi.nlm.nih.gov/gene/?term=EGFR            |          |          | 02       | 801      |    |    |  | ;152137;301;64855;399694;1499;2035;5336;1398;6777;79705;1399;868;5770;2549;3752;19;867;5604;1956;472;1500;7098 | L;CBLB;CCDC50;CRK;CRKL;CTNNB1;CTNND1;EGFR;EPB41;FAM129B;GAB1;GPRC5A;HDAC6;KCND3;LRRK1;MAP2K1;PLCG2;PTPN1;RGS16;SHC4;STAT5B;TLR3;VAV2 |
| Kinase_CSNK1D | casein kinase 1 delta                                         | https://www.ncbi.nlm.nih.gov/gene/?term=CSNK1D | -0.64609 | -1.5271  | 0.014414 | 0.125233 | 25 | 13 |  | 999;23621;2697;4193;1499;8864;2736;1633;2737;10413;4040;3091;324                                               | APC;BACE1;CDH1;CTNNB1;DCK;GJA1;GLI2;GLI3;HIF1A;LRP6;MDM2;PER2;YAP1                                                                   |
| Kinase_DYRK1A | dual specificity tyrosine phosphorylation regulated kinase 1A | https://www.ncbi.nlm.nih.gov/gene/?term=DYRK1A | -0.74777 | -1.52998 | 0.008993 | 0.130118 | 14 | 7  |  | 1827;23451;91750;2308;10253;5430;1859                                                                          | DYRK1A;FOXO1;LIN52;POLR2A;RCAN1;SF3B1;SPRY2                                                                                          |
| Kinase_PAK3   | p21 (RAC1) activated kinase 3                                 | https://www.ncbi.nlm.nih.gov/gene/?term=PAK3   | -0.81339 | -1.53452 | 0.01341  | 0.131284 | 9  | 2  |  | 5604;4638                                                                                                      | MAP2K1;MYLK                                                                                                                          |

|               |                                                                        |                                                                                                             |          |          |          |          |    |    |                                                  |                                                           |
|---------------|------------------------------------------------------------------------|-------------------------------------------------------------------------------------------------------------|----------|----------|----------|----------|----|----|--------------------------------------------------|-----------------------------------------------------------|
| Kinase_PAK5   | p21 (RAC1) activated kinase 5                                          | <a href="https://www.ncbi.nlm.nih.gov/gene/?term=PAK5">https://www.ncbi.nlm.nih.gov/gene/?term=PAK5</a>     | -0.81339 | -1.53452 | 0.01341  | 0.131284 | 9  | 2  | 5604;4638                                        | MAP2K1;MYLK                                               |
| Kinase_PAK2   | p21 (RAC1) activated kinase 2                                          | <a href="https://www.ncbi.nlm.nih.gov/gene/?term=PAK2">https://www.ncbi.nlm.nih.gov/gene/?term=PAK2</a>     | -0.68475 | -1.58431 | 0.012987 | 0.137066 | 21 | 10 | 340156;3725;840;1981;5597;25;80243;5604;4638;800 | ABL1;CALD1;CASP7;EIF4G1;JUN;MAP2K1;MAPK6;MYLK;MYLK4;PREX2 |
| Kinase_PIK3CA | phosphatidylinositol-4,5-bisphosphate 3-kinase catalytic subunit alpha | <a href="https://www.ncbi.nlm.nih.gov/gene/?term=PIK3CA">https://www.ncbi.nlm.nih.gov/gene/?term=PIK3CA</a> | -0.79607 | -1.53819 | 0.01518  | 0.147919 | 10 | 6  | 208;2932;207;10000;5170;5295                     | AKT1;AKT2;AKT3;GSK3B;PDPK1;PIK3R1                         |
| Kinase_PIK3CG | phosphatidylinositol-4,5-bisphosphate 3-kinase catalytic subunit gamma | <a href="https://www.ncbi.nlm.nih.gov/gene/?term=PIK3CG">https://www.ncbi.nlm.nih.gov/gene/?term=PIK3CG</a> | -0.76899 | -1.47402 | 0.03125  | 0.164571 | 10 | 6  | 208;2932;207;5294;10000;5170                     | AKT1;AKT2;AKT3;GSK3B;PDPK1;PIK3CG                         |
| Kinase_SGK1   | serum/glucocorticoid-inducible kinase                                  | <a href="https://www.ncbi.nlm.nih.gov/gene/?term=SGK1">https://www.ncbi.nlm.nih.gov/gene/?term=SGK1</a>     | -0.65166 | -1.47731 | 0.0369   | 0.165    | 21 | 12 | 23385;3551;4792;5744                             | CREB1;FBXW7;FOXO3;I                                       |

|                |                                                                        |                                                 |          |          |          |          |    |    |                                                                                                                       |                                                                                                                              |
|----------------|------------------------------------------------------------------------|-------------------------------------------------|----------|----------|----------|----------|----|----|-----------------------------------------------------------------------------------------------------------------------|------------------------------------------------------------------------------------------------------------------------------|
|                | corticoid regulated kinase 1                                           | ww.ncbi.nlm.nih.gov/gene/?term=SGK1             |          |          |          | 971      |    |    | 7;1385;2309;6416;55294;253260;65125;5594;200576                                                                       | KBKB;MAP2K4;MAPK1;NCSTN;NDRG2;NFKBIA;PIKFYVE;RICTOR;WNK1                                                                     |
| Kinase_MAPK9   | mitogen-activated protein kinase 9                                     | https://www.ncbi.nlm.nih.gov/gene/?term=MAPK9   | -0.57259 | -1.47763 | 0.021164 | 0.173638 | 41 | 23 | 3726;8660;5663;3725;2354;64689;4303;3667;2309;10140;9927;2353;6774;334;2355;122953;2002;9031;351;2308;54700;4773;1386 | APLP2;APP;ATF2;BAZ1B;ELK1;FOS;FOSB;FOSL2;FOXO1;FOXO3;FOXO4;GORASP1;IRS1;IRS2;JDP2;JUN;JUNB;MFN2;NFATC2;PSEN1;RRN3;STAT3;TOB1 |
| Kinase_RPS6KA4 | ribosomal protein S6 kinase A4                                         | https://www.ncbi.nlm.nih.gov/gene/?term=RPS6KA4 | 0.714299 | 1.597018 | 0.015419 | 0.175633 | 19 | 7  | 3020;468;3150;8352;8354;3021;8358                                                                                     | ATF4;H3F3A;H3F3B;HIST1H3B;HIST1H3C;HIST1H3I;HMGN1                                                                            |
| Kinase_PIK3CD  | phosphatidylinositol-4,5-bisphosphate 3-kinase catalytic subunit delta | https://www.ncbi.nlm.nih.gov/gene/?term=PIK3CD  | -0.79478 | -1.46451 | 0.029963 | 0.177903 | 8  | 5  | 208;2932;207;10000;5170                                                                                               | AKT1;AKT2;AKT3;GSK3B;PDPK1                                                                                                   |
| Kinase_PAK6    | p21 (RAC1) activated                                                   | https://www.ncbi.                               | -0.73452 | -1.49377 | 0.036538 | 0.178201 | 12 | 3  | 367;5604;4638                                                                                                         | AR;MAP2K1;MYLK                                                                                                               |

|               |                                     |                                                |          |          |          |          |    |    |                                                                               |                                                                                     |
|---------------|-------------------------------------|------------------------------------------------|----------|----------|----------|----------|----|----|-------------------------------------------------------------------------------|-------------------------------------------------------------------------------------|
|               | kinase 6                            | nlm.nih.gov/gene/?term=PAK6                    |          |          |          |          |    |    |                                                                               |                                                                                     |
| Kinase_NUAK1  | NUAK family kinase 1                | https://www.ncbi.nlm.nih.gov/gene/?term=NUAK1  | -0.9609  | -1.47803 | 0.001832 | 0.182245 | 4  | 2  | 4659;9113                                                                     | LATS1;PPP1R12A                                                                      |
| Kinase_MAPK10 | mitogen-activated protein kinase 10 | https://www.ncbi.nlm.nih.gov/gene/?term=MAPK10 | -0.62816 | -1.45825 | 0.034904 | 0.185439 | 25 | 16 | 3726;8660;3725;2354;4303;3667;2309;1822;2353;334;2355;2002;351;2308;4773;1386 | APLP2;APP;ATF2;ATN1;ELK1;FOS;FOSB;FOSL2;FOXO1;FOXO3;FOXO4;IRS1;IRS2;JUN;JUNB;NFATC2 |
| Kinase_JAK2   | Janus kinase 2                      | https://www.ncbi.nlm.nih.gov/gene/?term=JAK2   | -0.62803 | -1.47952 | 0.034672 | 0.18886  | 23 | 7  | 6777;6774;4217;5594;3717;2969;5781                                            | GTF2I;JAK2;MAP3K5;MAPK1;PTPN11;STAT3;STAT5B                                         |
| Kinase_TAF1   | TATA-box binding protein associated | https://www.ncbi.nlm.nih.gov/gene/             | -0.97032 | -1.43545 | 0.005254 | 0.196019 | 3  | 1  | 2957                                                                          | GTF2A1                                                                              |



|              |                                               |                                                                                                           |          |          |          |          |    |    |                                                                                                                                                                                         |                                                                                                                                                                                                               |
|--------------|-----------------------------------------------|-----------------------------------------------------------------------------------------------------------|----------|----------|----------|----------|----|----|-----------------------------------------------------------------------------------------------------------------------------------------------------------------------------------------|---------------------------------------------------------------------------------------------------------------------------------------------------------------------------------------------------------------|
|              | factor 1                                      | ?term=RAF1                                                                                                |          |          |          |          |    |    |                                                                                                                                                                                         |                                                                                                                                                                                                               |
| Kinase_RAF1  | Raf-1 proto-oncogene, serine/threonine kinase | <a href="https://www.ncbi.nlm.nih.gov/gene/?term=RAF1">https://www.ncbi.nlm.nih.gov/gene/?term=RAF1</a>   | -0.67006 | -1.48087 | 0.025362 | 0.19722  | 19 | 6  | 5594;4659;5604;7071;4790;5599                                                                                                                                                           | KLF10;MAP2K1;MAPK1;MAPK8;NFKB1;PPP1R12A                                                                                                                                                                       |
| Kinase_AURKB | aurora kinase B                               | <a href="https://www.ncbi.nlm.nih.gov/gene/?term=AURKB">https://www.ncbi.nlm.nih.gov/gene/?term=AURKB</a> | 0.508658 | 1.522171 | 0.006424 | 0.284905 | 87 | 33 | 6204;6132;332;10726;9212;3326;3151;3020;113130;11004;29101;6144;1058;11186;79080;10403;103910;3856;8352;5347;79980;24137;10014;8354;55577;5935;79016;157313;27316;55143;29127;3021;8358 | AURKB;BIRC5;CCDC86;CDCA2;CDCA5;CDCA8;CENPA;DDA1;DSN1;H3F3A;H3F3B;HDAC5;HIST1H3B;HIST1H3C;HIST1H3I;HMGN2;HSP90AB1;KIF2C;KIF4A;KRT8;MYL12B;NAGK;NDC80;NUDC;PLK1;RACGAP1;RASSF1;RBM3;RBMX;RPL21;RPL8;RPS10;SSU72 |
| Kinase_MYLK2 | myosin light chain kinase 2                   | <a href="https://www.ncbi.nlm.nih.gov/gene/?term=MYLK2">https://www.ncbi.nlm.nih.gov/gene/?term=MYLK2</a> | 0.751744 | 1.536764 | 0.042129 | 0.290192 | 11 | 4  | 4637;140465;103910;4636                                                                                                                                                                 | MYL12B;MYL5;MYL6;MYL6B                                                                                                                                                                                        |
| Kinase_BUB1  | BUB1                                          | <a href="https://www.ncbi.nlm.nih.gov/gene/?term=BUB1">https://www.ncbi.nlm.nih.gov/gene/?term=BUB1</a>   | 0.846287 | 1.450261 | 0.0593   | 0.512    | 5  | 2  | 51529;991                                                                                                                                                                               | ANAPC11;CDC20                                                                                                                                                                                                 |

|                |                                                          |                                                 |          |          |          |          |     |    |                                                                                                                                                                                       |                                                                                                                                                                           |
|----------------|----------------------------------------------------------|-------------------------------------------------|----------|----------|----------|----------|-----|----|---------------------------------------------------------------------------------------------------------------------------------------------------------------------------------------|---------------------------------------------------------------------------------------------------------------------------------------------------------------------------|
|                | mitotic checkpoint serine/threonine kinase               | ww.ncbi.nlm.nih.gov/gene/?term=BUB1             |          |          | 41       | 318      |     |    |                                                                                                                                                                                       |                                                                                                                                                                           |
| Kinase_PKMYT1  | protein kinase, membrane associated tyrosine/threonine 1 | https://www.ncbi.nlm.nih.gov/gene/?term=PKMYT1  | 0.901513 | 1.403437 | 0.067538 | 0.681191 | 3   | 3  | 891;9133;983                                                                                                                                                                          | CCNB1;CCNB2;CDK1                                                                                                                                                          |
| Kinase_RPS6KA6 | ribosomal protein S6 kinase A6                           | https://www.ncbi.nlm.nih.gov/gene/?term=RPS6KA6 | 0.683195 | 1.235382 | 0.258278 | 0.781459 | 7   | 4  | 3265;9088;468;699                                                                                                                                                                     | ATF4;BUB1;HRAS;PKMYT1                                                                                                                                                     |
| Kinase_CSNK2A1 | casein kinase 2 alpha 1                                  | https://www.ncbi.nlm.nih.gov/gene/?term=CSNK2A1 | 0.386992 | 1.31272  | 0.012346 | 0.804231 | 255 | 78 | 1460;25855;90480;23;1936;51154;9141;332;3178;8894;1616;3326;5303;4150;8125;3020;10541;995;4605;9616;51053;10728;9049;55502;55611;5888;8841;1978;23028;3183;64151;11124;997;10921;1649 | ABCF1;AIP;ANP32A;ANP32B;ARRB2;BCAM;BIRC5;BRMS1;CALM3;CDC25B;CDC25C;CDC34;CDC37;CDK1;CEBPD;CSNK2B;DAXX;DDIT3;EEF1D;EIF2S2;EIF4EBP1;EXOSC9;FAF1;GADD45GIP1;GGA1;GMNN;H3F3A; |

|            |                                    |                                                                                                                                |          |          |              |              |    |    |                                                                                                                                                                                                                                                                       |                                                                                                                                                                                                                                                                                                                                                                                                             |
|------------|------------------------------------|--------------------------------------------------------------------------------------------------------------------------------|----------|----------|--------------|--------------|----|----|-----------------------------------------------------------------------------------------------------------------------------------------------------------------------------------------------------------------------------------------------------------------------|-------------------------------------------------------------------------------------------------------------------------------------------------------------------------------------------------------------------------------------------------------------------------------------------------------------------------------------------------------------------------------------------------------------|
|            |                                    |                                                                                                                                |          |          |              |              |    |    | ;6722;3150;103910;23<br>435;5883;11140;6741;8<br>363;983;8352;8364;59<br>05;10062;808;10381;8<br>354;9894;994;6804;51<br>447;4793;3065;3978;5<br>393;8366;4171;6520;6<br>732;3021;8358;7298;7<br>515;9129;4059;9656;4<br>09;7518;6749;26088;8<br>367;23397;54926;1052 | H3F3B;HDAC1;HDAC3;<br>HES6;HIST1H3B;HIST1<br>H3C;HIST1H3I;HIST1H4<br>B;HIST1H4C;HIST1H4E;<br>HIST1H4J;HMGN1;HNR<br>NPA1;HNRNPC;HSP90A<br>B1;IP6K2;KDM1A;LIG1;<br>MAZ;MCM2;MDC1;MRT<br>O4;MYBL2;MYL12B;NC<br>APG;NCAPH;NFKBIB;N<br>R1H3;OTUB1;PDCD5;PI<br>N4;PRPF3;PTGES3;RAD<br>51;RAD9A;RANGAP1;R<br>NF7;RNPS1;SLC3A2;SRF<br>;SRPK1;SSB;SSRP1;STX<br>1A;TARDBP;TELO2;TU<br>BB3;TYMS;UBE2R2;XR<br>CC1;XRCC4 |
| Kinase_ATR | ATR<br>serine/threon<br>ine kinase | <a href="https://www.ncbi.nlm.nih.gov/gene/?term=ATR">https://w<br/>ww.ncbi.<br/>nlm.nih.g<br/>ov/gene/<br/>?term=A<br/>TR</a> | 0.404061 | 1.164754 | 0.1764<br>71 | 0.813<br>056 | 66 | 27 | 2873;84126;1616;3014<br>;4869;51659;2193;1118<br>6;7507;55215;1111;417<br>2;1869;5883;11200;611<br>8;2130;50485;64421;6<br>3922;65108;4171;2177<br>;9656;7517;1029;6485<br>2                                                                                          | ATRIP;CDKN2A;CHEK1;<br>CHEK2;CHTF18;DAXX;<br>DCLRE1C;E2F1;EWSR1;<br>FANCD2;FANCI;FARSA;<br>GINS2;GPS1;H2AFX;MA<br>RCKSL1;MCM2;MCM3;<br>MDC1;NPM1;RAD9A;R<br>ASSF1;RPA2;SMARCAL                                                                                                                                                                                                                              |

|              |                          |                                                                                                           |          |          |          |          |     |    |                                                                                                                                                             |                                                                                                                                                                                         |
|--------------|--------------------------|-----------------------------------------------------------------------------------------------------------|----------|----------|----------|----------|-----|----|-------------------------------------------------------------------------------------------------------------------------------------------------------------|-----------------------------------------------------------------------------------------------------------------------------------------------------------------------------------------|
|              |                          |                                                                                                           |          |          |          |          |     |    |                                                                                                                                                             | 1;TUT1;XPA;XRCC3                                                                                                                                                                        |
| Kinase_CHEK1 | checkpoint kinase 1      | <a href="https://www.ncbi.nlm.nih.gov/gene/?term=CHEK1">https://www.ncbi.nlm.nih.gov/gene/?term=CHEK1</a> | 0.371179 | 1.174065 | 0.099307 | 0.813778 | 130 | 30 | 1460;6143;79171;22913;2547;10775;6137;6742;9212;10155;4000;3020;3833;995;5528;5605;51530;10969;1819;23223;5888;11186;993;4904;3838;2178;1111;4172;4174;2237 | AURKB;CDC25A;CDC25C;CHEK1;CSNK2B;DRG2;EBNA1BP2;FANCE;FEN1;H3F3A;KIFC1;KPNA2;LMNA;MAP2K2;MCM3;MCM5;POP4;PPP2R5D;RAD51;RALY;RASSF1;RBM42;RPL13;RPL19;RRP12;SSBP1;TRIM28;XRCC6;YBX1;ZC3HC1 |
| Kinase_LMTK2 | lemur tyrosine kinase 2  | <a href="https://www.ncbi.nlm.nih.gov/gene/?term=LMTK2">https://www.ncbi.nlm.nih.gov/gene/?term=LMTK2</a> | 0.786932 | 1.183819 | 0.307203 | 0.814477 | 3   | 1  | 5499                                                                                                                                                        | PPP1CA                                                                                                                                                                                  |
| Kinase_PBK   | PDZ binding kinase       | <a href="https://www.ncbi.nlm.nih.gov/gene/?term=PBK">https://www.ncbi.nlm.nih.gov/gene/?term=PBK</a>     | 0.772451 | 1.2371   | 0.270742 | 0.814703 | 4   | 1  | 5052                                                                                                                                                        | PRDX1                                                                                                                                                                                   |
| Kinase_DAPK1 | death associated protein | <a href="https://www.ncbi.nlm.nih.gov/gene/?term=DAPK1">https://www.ncbi.nlm.nih.gov/gene/?term=DAPK1</a> | 0.585281 | 1.349982 | 0.101322 | 0.822795 | 21  | 10 | 23521;6194;3297;5300;4172;103910;4636;6804;1613;5595                                                                                                        | DAPK3;HSF1;MAPK3;MCM3;MYL12B;MYL5;PIN1;RPL13A;RPS6;STX1                                                                                                                                 |

|                     |                                                                                 |                                                                          |          |          |              |              |    |    |                                                           |                                                                  |
|---------------------|---------------------------------------------------------------------------------|--------------------------------------------------------------------------|----------|----------|--------------|--------------|----|----|-----------------------------------------------------------|------------------------------------------------------------------|
|                     | kinase 1                                                                        | ov/gene/?term=D<br>APK1                                                  |          |          |              |              |    |    |                                                           | A                                                                |
| Kinase_MAP<br>KAPK2 | mitogen-<br>activated<br>protein<br>kinase-<br>activated<br>protein<br>kinase 2 | https://w<br>ww.ncbi.<br>nlm.nih.g<br>ov/gene/<br>?term=M<br>APKAP<br>K2 | 0.498159 | 1.295728 | 0.1094<br>09 | 0.823<br>335 | 36 | 10 | 26574;3315;10155;329<br>7;995;9532;3875;6722;<br>5347;994 | AATF;BAG2;CDC25B;C<br>DC25C;HSF1;HSPB1;KR<br>T18;PLK1;SRF;TRIM28 |
| Kinase_MAP2<br>K3   | mitogen-<br>activated<br>protein<br>kinase kinase<br>3                          | https://w<br>ww.ncbi.<br>nlm.nih.g<br>ov/gene/<br>?term=M<br>AP2K3       | 0.734092 | 1.212498 | 0.2853<br>83 | 0.823<br>592 | 5  | 3  | 1432;5603;6300                                            | MAPK12;MAPK13;MAP<br>K14                                         |
| Kinase_CSNK<br>2A2  | casein kinase<br>2 alpha 2                                                      | https://w<br>ww.ncbi.<br>nlm.nih.g<br>ov/gene/<br>?term=C<br>SNK2A2      | 0.570022 | 1.200309 | 0.2406<br>18 | 0.828<br>457 | 14 | 6  | 1460;3297;11140;6732;<br>7298;7515                        | CDC37;CSNK2B;HSF1;S<br>RPK1;TYMS;XRCC1                           |
| Kinase_UHM<br>K1    | U2AF<br>homology<br>motif kinase<br>1                                           | https://w<br>ww.ncbi.<br>nlm.nih.g<br>ov/gene/                           | 0.787279 | 1.187197 | 0.3186<br>81 | 0.836<br>979 | 3  | 1  | 3925                                                      | STMN1                                                            |

|                   |                                                        |                                                                                                             |          |          |              |              |     |    |                                                                                                                          |                                                                                                                      |
|-------------------|--------------------------------------------------------|-------------------------------------------------------------------------------------------------------------|----------|----------|--------------|--------------|-----|----|--------------------------------------------------------------------------------------------------------------------------|----------------------------------------------------------------------------------------------------------------------|
|                   |                                                        | ?term=U<br>HMK1                                                                                             |          |          |              |              |     |    |                                                                                                                          |                                                                                                                      |
| Kinase_WEE1       | WEE1 G2<br>checkpoint<br>kinase                        | <a href="https://www.ncbi.nlm.nih.gov/gene/?term=WEE1">https://www.ncbi.nlm.nih.gov/gene/?term=WEE1</a>     | 0.796933 | 1.318664 | 0.1421<br>69 | 0.838<br>856 | 5   | 3  | 891;9133;983                                                                                                             | CCNB1;CCNB2;CDK1                                                                                                     |
| Kinase_SRPK<br>1  | SRSF<br>protein<br>kinase 1                            | <a href="https://www.ncbi.nlm.nih.gov/gene/?term=SRPK1">https://www.ncbi.nlm.nih.gov/gene/?term=SRPK1</a>   | 0.863468 | 1.362269 | 0.1118<br>14 | 0.840<br>206 | 3   | 3  | 5936;9939;6732                                                                                                           | RBM4;RBM8A;SRPK1                                                                                                     |
| Kinase_MAP2<br>K6 | mitogen-<br>activated<br>protein<br>kinase kinase<br>6 | <a href="https://www.ncbi.nlm.nih.gov/gene/?term=MAP2K6">https://www.ncbi.nlm.nih.gov/gene/?term=MAP2K6</a> | 0.697075 | 1.252585 | 0.2464<br>11 | 0.847<br>074 | 7   | 4  | 1432;5603;3299;6300                                                                                                      | HSF4;MAPK12;MAPK13;<br>MAPK14                                                                                        |
| Kinase_CDK2       | cyclin<br>dependent<br>kinase 2                        | <a href="https://www.ncbi.nlm.nih.gov/gene/?term=CDK2">https://www.ncbi.nlm.nih.gov/gene/?term=CDK2</a>     | 0.362908 | 1.240075 | 0.0248<br>14 | 0.849<br>204 | 278 | 65 | 1460;51529;51070;51035;3615;26121;6135;22913;26284;6188;28973;2547;3159;84126;10726;55929;124944;283899;6136;3835;81620; | AARS2;ANAPC11;ANAPC5;ANAPC7;ATRIP;C17orf49;C6orf106;CDC20;CDC25C;CDC6;CDK7;CDT1;CHEK1;CRTC2;CSNK2B;DBNL;DLGAP5;DMAP1 |

|                  |                                                   |                                                                                                           |          |          |              |              |   |   |                                                                                                                                                                                                                                             |                                                                                                                                                                                                                                                                                            |
|------------------|---------------------------------------------------|-----------------------------------------------------------------------------------------------------------|----------|----------|--------------|--------------|---|---|---------------------------------------------------------------------------------------------------------------------------------------------------------------------------------------------------------------------------------------------|--------------------------------------------------------------------------------------------------------------------------------------------------------------------------------------------------------------------------------------------------------------------------------------------|
|                  |                                                   |                                                                                                           |          |          |              |              |   |   | 6949;991;27343;5499;7083;3925;995;4605;27043;51434;4869;4176;51530;112398;5451;9775;23421;1022;81890;57505;84289;1111;28988;29920;4172;6625;1869;3024;23557;5883;6829;7283;6241;200186;51433;6118;22974;2146;64771;3978;1870;990;28987;9787 | ;E2F1;E2F2;EGLN2;EIF4A3;ERAL1;EZH2;HIST1H1A;HMGA1;IMPDH2;ING5;INO80E;ITGB3BP;KIF22;LIG1;MCM3;MCM7;MRPS18B;MYBL2;NOB1;NOSIP;NPM1;NUDC;PELP1;POLL;POU2F1;PPP1CA;PRPF31;PYCR2;QTRT1;RAD9A;RALY;RPA2;RPL11;RPL12;RPS3;RRM2;SNAPIN;SNRNP70;STMN1;SUPT5H;TCOF1;TK1;TPX2;TUBG1;UBXN1;XRCC6;ZC3HC1 |
| Kinase_MAR<br>K3 | microtubule<br>affinity<br>regulating<br>kinase 3 | <a href="https://www.ncbi.nlm.nih.gov/gene/?term=MARK3">https://www.ncbi.nlm.nih.gov/gene/?term=MARK3</a> | 0.876361 | 1.329568 | 0.1214<br>13 | 0.855<br>667 | 3 | 1 | 995                                                                                                                                                                                                                                         | CDC25C                                                                                                                                                                                                                                                                                     |
| Kinase_NEK2      | NIMA<br>related<br>kinase 2                       | <a href="https://www.ncbi.nlm.nih.gov/gene/?term=N">https://www.ncbi.nlm.nih.gov/gene/?term=N</a>         | 0.67955  | 1.270492 | 0.2160<br>92 | 0.877<br>189 | 8 | 7 | 4869;10403;5501;4751;2175;11190;116840                                                                                                                                                                                                      | CEP250;CNTROB;FANCA;NDC80;NEK2;NPM1;PPP1CC                                                                                                                                                                                                                                                 |
