# Supplementary material for: SNRPC promotes hepatocellular carcinoma cell motility by inducing epithelial‐mesenchymal transition
Source: PubMed Central journal article supplement (PMC8167856; doi:10.1002/2211-5463.13175), 2021-05-12
Supplement: FEB4-11-1757-s003.pdf [file FEB4-11-1757-s003.pdf]

**Supplementary Table 1. 150 DEGs identified among 3 GEO database.**

| gene    | logFC    | adj.P.Val | group value |
|---------|----------|-----------|-------------|
| SNRPC   | 4.574933 | 6.25E-97  | up          |
| YWHAZ   | 3.511826 | 1.92E-62  | up          |
| CPD     | 2.761155 | 2.67E-58  | up          |
| CAP2    | 2.569253 | 8E-114    | up          |
| LCAT    | 2.164215 | 8.7E-99   | up          |
| NCAPG   | 2.151238 | 5.11E-80  | up          |
| CCDC34  | 2.068671 | 9.21E-77  | up          |
| CAMK2B  | 2.007978 | 2.48E-42  | up          |
| AURKA   | 1.983505 | 1.37E-73  | up          |
| NOL7    | 1.938368 | 3.29E-56  | up          |
| CNIH4   | 1.933507 | 1.78E-67  | up          |
| MED20   | 1.855457 | 1.96E-92  | up          |
| SQLE    | 1.777251 | 9.44E-72  | up          |
| INMT    | 1.77531  | 4.82E-47  | up          |
| TP53I3  | 1.762078 | 7.05E-52  | up          |
| AURKB   | 1.73766  | 1.58E-61  | up          |
| HNRNPUL | 1.693809 | 2.85E-74  | up          |
| SMYD3   | 1.679542 | 6.48E-51  | up          |
| PITX1   | 1.625843 | 1.24E-28  | up          |
| PLVAP   | 1.605489 | 3.19E-83  | up          |
| AKR1C3  | 1.546467 | 6.36E-83  | up          |
| UBE2C   | 1.535235 | 1.99E-92  | up          |
| COLEC11 | 1.53393  | 9.24E-22  | up          |
| PRSS8   | 1.526529 | 2.8E-08   | up          |
| RAP2A   | 1.514545 | 1.6E-56   | up          |
| CLEC1B  | 1.512202 | 5.2E-110  | up          |
| TOP2A   | 1.461528 | 3.25E-95  | up          |
| MCM4    | 1.436981 | 4.68E-59  | up          |
| HIF0    | 1.428966 | 2E-47     | up          |
| AKR1B10 | 1.366282 | 8.75E-39  | up          |
| MASP1   | 1.361788 | 6.75E-50  | up          |
| ACLY    | 1.345574 | 1.77E-86  | up          |
| PTTG1   | 1.339564 | 9E-106    | up          |
| PTH1R   | 1.336484 | 6.34E-78  | up          |
| HAMP    | 1.332288 | 1.42E-84  | up          |
| CCNB2   | 1.332113 | 2.43E-86  | up          |
| TUBB    | 1.252528 | 4.61E-63  | up          |
| PSMB4   | 1.250749 | 5.7E-90   | up          |
| ZFP36   | 1.248443 | 3.29E-19  | up          |
| CKAP2L  | 1.223952 | 3.12E-68  | up          |
| SNORA22 | 1.192105 | 2.42E-29  | up          |
| NAXE    | 1.189828 | 5.52E-85  | up          |
| PODXL   | 1.184661 | 2.64E-78  | up          |
| LOXL4   | 1.172358 | 8.79E-21  | up          |

|         |          |          |    |
|---------|----------|----------|----|
| MYOM2   | 1.171715 | 1.13E-43 | up |
| CDCA5   | 1.165991 | 1.46E-78 | up |
| NPW     | 1.162049 | 2.83E-16 | up |
| GBA     | 1.128271 | 1.04E-85 | up |
| RACGAP1 | 1.108303 | 9.2E-70  | up |
| KBTBD11 | 1.089561 | 4.06E-71 | up |
| MID1IP1 | 1.087779 | 8.83E-65 | up |
| SCRIB   | 1.081865 | 1.9E-48  | up |
| AP3B1   | 1.07841  | 5.69E-87 | up |
| TTC36   | 1.062688 | 8.6E-85  | up |
| MRPL24  | 1.022922 | 5.6E-79  | up |
| IGF2BP3 | 1.01544  | 4.7E-31  | up |
| NOCT    | 1.005636 | 4.95E-43 | up |
| ACACA   | 1.005588 | 3.12E-69 | up |
| CTSA    | 1.003395 | 6.08E-67 | up |
| CXCL12  | 1.00245  | 1.01E-55 | up |
| ACSM3   | 0.99913  | 1.78E-60 | up |
| XPR1    | 0.997282 | 7.34E-86 | up |
| UCK2    | 0.974669 | 2.47E-68 | up |
| NUSAP1  | 0.949334 | 2.41E-96 | up |
| PSMD4   | 0.947235 | 1.3E-110 | up |
| COPA    | 0.941485 | 4.38E-98 | up |
| CDKN3   | 0.934959 | 7.79E-67 | up |
| ACLY    | 0.91164  | 1.77E-86 | up |
| S100A10 | 0.889657 | 6.97E-69 | up |
| TBCE    | 0.888894 | 5.31E-73 | up |
| PLOD3   | 0.881515 | 1.96E-88 | up |
| SLC50A1 | 0.879415 | 7.97E-63 | up |
| GLMP    | 0.866568 | 9.92E-80 | up |
| ERBB3   | 0.85766  | 1.98E-58 | up |
| COLEC11 | 0.84609  | 9.24E-22 | up |
| HMGA1   | 0.842167 | 1.97E-52 | up |
| HSPB1   | 0.806252 | 1.38E-94 | up |
| NCSTN   | 0.797254 | 5.24E-76 | up |
| MARCO   | 0.783121 | 7.38E-57 | up |
| RRAGD   | 0.775129 | 3.86E-56 | up |
| SLC39A1 | 0.772582 | 2.39E-91 | up |
| SF3B4   | 0.771039 | 3.2E-110 | up |
| CXCL12  | 0.765573 | 1.01E-55 | up |
| NUP62   | 0.757396 | 2.1E-106 | up |
| ID1     | 0.751046 | 2.79E-32 | up |
| NEU1    | 0.729563 | 3.03E-88 | up |
| UQCC2   | 0.721637 | 1.75E-90 | up |
| SMG7    | 0.720902 | 4.68E-86 | up |
| ANGPTL6 | 0.720576 | 3.12E-73 | up |
| ETS2    | 0.715913 | 3.96E-17 | up |

|          |          |          |      |
|----------|----------|----------|------|
| LSM4     | 0.709653 | 1.12E-70 | up   |
| FAM13A   | 0.698537 | 3.54E-72 | up   |
| FCN3     | 0.692703 | 1.5E-110 | up   |
| DDX39A   | 0.691292 | 1.6E-120 | up   |
| SPINK1   | 0.682358 | 4.88E-49 | up   |
| CHST4    | 0.639911 | 7E-79    | up   |
| PSMD4    | 0.631005 | 1.3E-110 | up   |
| PNPLA7   | 0.610502 | 1.26E-47 | up   |
| CKS2     | 0.60899  | 1.53E-49 | up   |
| TACSTD2  | 0.594836 | 1.23E-15 | up   |
| TKT      | 0.587611 | 1.21E-63 | up   |
| AURKA    | 0.586151 | 1.37E-73 | up   |
| ANXA2    | 0.55389  | 9.52E-80 | up   |
| CSTB     | 0.551023 | 4.79E-49 | up   |
| RALY     | 0.550741 | 2.11E-69 | up   |
| FCN2     | 0.531051 | 3.5E-114 | up   |
| BSG      | -0.69494 | 1.26E-51 | down |
| FAM83H   | -0.70917 | 7.65E-52 | down |
| PRICKLE4 | -0.7442  | 4.26E-73 | down |
| IGFALS   | -0.79952 | 1.69E-93 | down |
| TUBG1    | -0.86588 | 1.37E-84 | down |
| SNX27    | -0.95426 | 1.48E-85 | down |
| FAM189B  | -0.9838  | 3.69E-98 | down |
| BGN      | -1.04953 | 7.05E-08 | down |
| DBH      | -1.06068 | 1.4E-106 | down |
| EGR1     | -1.09117 | 1.2E-37  | down |
| GOT2     | -1.13106 | 2.65E-27 | down |
| DNAJC9   | -1.16818 | 2.56E-63 | down |
| TRIM24   | -1.21805 | 3.5E-63  | down |
| FBXL18   | -1.22517 | 2.33E-73 | down |
| MGST1    | -1.24268 | 1.01E-13 | down |
| CCT3     | -1.27097 | 1.37E-90 | down |
| TPR      | -1.30354 | 1.52E-82 | down |
| ECM1     | -1.30504 | 1.22E-98 | down |
| FOSB     | -1.34082 | 5.21E-42 | down |
| RFWD2    | -1.40704 | 3.79E-96 | down |
| CTNNA1   | -1.43659 | 6.4E-102 | down |
| PRC1     | -1.47347 | 1.08E-94 | down |
| FAM20B   | -1.48724 | 3.58E-85 | down |
| LY6E     | -1.55494 | 6.88E-55 | down |
| SLC16A2  | -1.57043 | 4.1E-23  | down |
| GPC3     | -1.57475 | 1.57E-82 | down |
| TXNRD1   | -1.59619 | 1.79E-44 | down |
| EFTUD2   | -1.86292 | 2.3E-101 | down |
| CDC20    | -1.95014 | 6.62E-94 | down |
| COLEC10  | -2.02262 | 5.37E-88 | down |

|        |          |          |      |
|--------|----------|----------|------|
| ASPM   | -2.04551 | 5.81E-91 | down |
| DPT    | -2.05424 | 8.14E-35 | down |
| CD1D   | -2.06937 | 3.59E-23 | down |
| PHPT1  | -2.10255 | 7.74E-67 | down |
| SQLE   | -2.18494 | 9.44E-72 | down |
| HMMR   | -2.19695 | 8.59E-60 | down |
| ATOH8  | -2.30146 | 5.58E-57 | down |
| SAE1   | -2.51305 | 3.2E-123 | down |
| FMO3   | -2.53045 | 2.39E-24 | down |
| CD34   | -2.64031 | 2.24E-96 | down |
| MFAP4  | -2.65598 | 6.51E-25 | down |
| PTK2   | -2.82934 | 3.06E-90 | down |
| ADGRG7 | -2.87836 | 7.13E-78 | down |
| RPL15  | -3.70109 | 4.15E-43 | down |
