# Supplementary material for: SNRPC promotes hepatocellular carcinoma cell motility by inducing epithelial‐mesenchymal transition
Source: PubMed Central journal article supplement (PMC8167856; doi:10.1002/2211-5463.13175), 2021-05-12
Supplement: FEB4-11-1757-s006.pdf [file FEB4-11-1757-s006.pdf]

**Supplementary Table2. SNRPC co-expressed genes.**

| Query     | Correlation coefficient | P-value     | FDR (BH)    |
|-----------|-------------------------|-------------|-------------|
| SNRPC     | 1                       | 1E-108      | 1E-104      |
| TOMM6     | 0.863339324             | 1.1296E-108 | 1.1248E-104 |
| CSNK2B    | 0.844399251             | 2.4217E-99  | 1.6076E-95  |
| LSM2      | 0.80021318              | 1.00602E-81 | 5.0087E-78  |
| MRPL14    | 0.796223443             | 2.36173E-80 | 9.40678E-77 |
| MEA1      | 0.792983881             | 2.90956E-79 | 9.65731E-76 |
| RPP21     | 0.787176885             | 2.34817E-77 | 6.68055E-74 |
| NOL7      | 0.785940872             | 5.87365E-77 | 1.46217E-73 |
| PFDN6     | 0.784776616             | 1.38535E-76 | 3.06547E-73 |
| WDR46     | 0.775377838             | 1.16741E-73 | 2.32489E-70 |
| RPS10     | 0.771796703             | 1.39589E-72 | 2.5272E-69  |
| KLHDC3    | 0.758787165             | 7.93867E-69 | 1.31749E-65 |
| RDBP      | 0.749740688             | 2.36088E-66 | 3.61669E-63 |
| MRPS18A   | 0.747761473             | 7.94478E-66 | 1.13015E-62 |
| CUTA      | 0.744706743             | 5.0569E-65  | 6.71388E-62 |
| C6orf129  | 0.741206938             | 4.08142E-64 | 5.08009E-61 |
| ZNRD1     | 0.740414576             | 6.51787E-64 | 7.63549E-61 |
| C6orf125  | 0.735984767             | 8.65173E-63 | 9.57218E-60 |
| NFKBIL1   | 0.726195282             | 2.18904E-60 | 2.29446E-57 |
| C6orf153  | 0.725189223             | 3.81343E-60 | 3.79722E-57 |
| FKBPL     | 0.719469891             | 8.54293E-59 | 8.10154E-56 |
| EIF6      | 0.700904855             | 1.23606E-54 | 1.11891E-51 |
| RPL38     | 0.695063608             | 2.1639E-53  | 1.87365E-50 |
| LYRM4     | 0.691912646             | 9.85232E-53 | 8.17537E-50 |
| SNRPD2    | 0.687115953             | 9.54036E-52 | 7.59985E-49 |
| RPL27     | 0.685088024             | 2.45871E-51 | 1.88328E-48 |
| MRPL2     | 0.681467355             | 1.30761E-50 | 9.64482E-48 |
| RPS21     | 0.681152763             | 1.51023E-50 | 1.07415E-47 |
| POLR2H    | 0.679866984             | 2.71606E-50 | 1.86519E-47 |
| PSMG4     | 0.679595756             | 3.07286E-50 | 2.03987E-47 |
| POLR1C    | 0.674834431             | 2.62534E-49 | 1.68657E-46 |
| RPS18     | 0.673777716             | 4.20326E-49 | 2.61587E-46 |
| RPLP2     | 0.672252615             | 8.26212E-49 | 4.98607E-46 |
| C11orf48  | 0.668974561             | 3.48376E-48 | 2.04056E-45 |
| BAT4      | 0.667774624             | 5.87249E-48 | 3.34145E-45 |
| ROMO1     | 0.664210759             | 2.72995E-47 | 1.51019E-44 |
| CDKN2AIPN | 0.662945286             | 4.68714E-47 | 2.52282E-44 |
| SNF8      | 0.662216553             | 6.39108E-47 | 3.34943E-44 |
| SNRPB     | 0.661351536             | 9.22434E-47 | 4.71033E-44 |
| PSMB3     | 0.661111214             | 1.02121E-46 | 5.01674E-44 |
| RPL23A    | 0.661084495             | 1.03282E-46 | 5.01674E-44 |
| RPL24     | 0.660792002             | 1.16879E-46 | 5.542E-44   |
| ANAPC11   | 0.660065734             | 1.58796E-46 | 7.35448E-44 |
| SNRPE     | 0.656706515             | 6.48182E-46 | 2.93376E-43 |

|           |              |             |             |
|-----------|--------------|-------------|-------------|
| TRMT112   | 0.654312705  | 1.74681E-45 | 7.73062E-43 |
| RPL35A    | 0.652308323  | 3.97882E-45 | 1.72257E-42 |
| GNL1      | 0.651433657  | 5.68741E-45 | 2.40989E-42 |
| TMEM14C   | 0.650002351  | 1.01792E-44 | 4.19054E-42 |
| RPL27A    | 0.649970725  | 1.03107E-44 | 4.19054E-42 |
| HIPK3     | -0.649805996 | 1.10228E-44 | 4.39036E-42 |
| MRPL11    | 0.649526903  | 1.23421E-44 | 4.81947E-42 |
| TMEM101   | 0.649314805  | 1.34483E-44 | 5.15044E-42 |
| RFXANK    | 0.648426147  | 1.92546E-44 | 7.23502E-42 |
| REST      | -0.648347773 | 1.98727E-44 | 7.32898E-42 |
| RPL37     | 0.647665849  | 2.61503E-44 | 9.46879E-42 |
| RPL23     | 0.647427168  | 2.87828E-44 | 1.02359E-41 |
| RPS14     | 0.646837892  | 3.646E-44   | 1.27386E-41 |
| C10orf118 | -0.645242888 | 6.89636E-44 | 2.36795E-41 |
| BYSL      | 0.644645927  | 8.7457E-44  | 2.95204E-41 |
| FNIP2     | -0.643735202 | 1.25532E-43 | 4.16662E-41 |
| C6orf108  | 0.643428065  | 1.41765E-43 | 4.62828E-41 |
| SECISBP2L | -0.6432814   | 1.50234E-43 | 4.82566E-41 |
| TAF11     | 0.64270888   | 1.88365E-43 | 5.95443E-41 |
| ARL15     | -0.642666557 | 1.91538E-43 | 5.96011E-41 |
| ELK3      | -0.641251135 | 3.34331E-43 | 1.02434E-40 |
| DYNLRB1   | 0.640158396  | 5.12954E-43 | 1.5478E-40  |
| RPL19     | 0.639832761  | 5.82547E-43 | 1.73156E-40 |
| IL6ST     | -0.639584427 | 6.41834E-43 | 1.87972E-40 |
| DTYMK     | 0.639243843  | 7.32972E-43 | 2.11553E-40 |
| RPL32     | 0.638822775  | 8.63532E-43 | 2.45675E-40 |
| FBL       | 0.637873676  | 1.24836E-42 | 3.50155E-40 |
| HERC3     | -0.637593297 | 1.3916E-42  | 3.79689E-40 |
| NHP2      | 0.637592973  | 1.39178E-42 | 3.79689E-40 |
| EMG1      | 0.637354998  | 1.52607E-42 | 4.10698E-40 |
| RNF181    | 0.637214136  | 1.61152E-42 | 4.27913E-40 |
| FLOT1     | 0.636853813  | 1.85229E-42 | 4.85372E-40 |
| CCDC58    | 0.636697287  | 1.96767E-42 | 5.08911E-40 |
| RPLP1     | 0.636318628  | 2.27708E-42 | 5.81385E-40 |
| RPL37A    | 0.635475486  | 3.14984E-42 | 7.94038E-40 |
| NSUN5     | 0.634336907  | 4.87393E-42 | 1.2133E-39  |
| CCHCR1    | 0.633914523  | 5.72811E-42 | 1.40834E-39 |
| RPL30     | 0.633397494  | 6.97765E-42 | 1.69463E-39 |
| NME1      | 0.633241257  | 7.40583E-42 | 1.77695E-39 |
| C9orf102  | -0.63241979  | 1.01233E-41 | 2.40006E-39 |
| RALGAPA2  | -0.631651661 | 1.35483E-41 | 3.17429E-39 |
| NDUFAF2   | 0.631606311  | 1.37831E-41 | 3.19175E-39 |
| MYEOV2    | 0.631532493  | 1.41739E-41 | 3.24451E-39 |
| PHB       | 0.631324201  | 1.53367E-41 | 3.4708E-39  |
| DOCK9     | -0.631035972 | 1.71031E-41 | 3.82706E-39 |
| NDUFB11   | 0.630696045  | 1.94466E-41 | 4.30311E-39 |

|          |              |             |             |
|----------|--------------|-------------|-------------|
| ZC3H13   | -0.630509205 | 2.08674E-41 | 4.56676E-39 |
| EXOSC1   | 0.6304326    | 2.14793E-41 | 4.64956E-39 |
| PFDN5    | 0.630350168  | 2.21575E-41 | 4.74479E-39 |
| ATP5G2   | 0.630218995  | 2.32806E-41 | 4.93228E-39 |
| RPS7     | 0.630164581  | 2.37629E-41 | 4.98146E-39 |
| RBM42    | 0.629615242  | 2.92218E-41 | 6.06199E-39 |
| AKAP2    | -0.629057826 | 3.60287E-41 | 7.39703E-39 |
| MLL3     | -0.6270917   | 7.51536E-41 | 1.52723E-38 |
| ARHGEF12 | -0.626423795 | 9.63605E-41 | 1.93097E-38 |
| SNRK     | -0.626407086 | 9.69608E-41 | 1.93097E-38 |
| COMMD4   | 0.626127865  | 1.07558E-40 | 2.12082E-38 |
| LSM3     | 0.625903317  | 1.16907E-40 | 2.28254E-38 |
| RPL14    | 0.625527048  | 1.34407E-40 | 2.59876E-38 |
| RBM43    | -0.624169802 | 2.21958E-40 | 4.25027E-38 |
| PSMD13   | 0.623562429  | 2.77594E-40 | 5.24574E-38 |
| RPS8     | 0.623546643  | 2.79211E-40 | 5.24574E-38 |
| REV3L    | -0.623289896 | 3.06852E-40 | 5.71117E-38 |
| C5orf41  | -0.623039657 | 3.36395E-40 | 6.18831E-38 |
| TMEM14B  | 0.62302104   | 3.38702E-40 | 6.18831E-38 |
| KIAA1109 | -0.622383827 | 4.27861E-40 | 7.74623E-38 |
| KIAA0247 | -0.621417346 | 6.09231E-40 | 1.09305E-37 |
| USP12    | -0.620925953 | 7.28805E-40 | 1.29591E-37 |
| MAP3K2   | -0.619024855 | 1.45352E-39 | 2.56166E-37 |
| PSMD4    | 0.618837093  | 1.55568E-39 | 2.71766E-37 |
| PPTC7    | -0.618675992 | 1.64898E-39 | 2.8556E-37  |
| CHD9     | -0.617800834 | 2.26136E-39 | 3.88232E-37 |
| SCNM1    | 0.61748253   | 2.53598E-39 | 4.31659E-37 |
| EHMT2    | 0.616698643  | 3.36118E-39 | 5.6727E-37  |
| NFIC     | -0.616437418 | 3.69135E-39 | 6.17759E-37 |
| C8orf59  | 0.615860701  | 4.5383E-39  | 7.53168E-37 |
| RPS20    | 0.614879902  | 6.44213E-39 | 1.06029E-36 |
| C15orf63 | 0.614728814  | 6.79857E-39 | 1.10978E-36 |
| EXOC6B   | -0.613917181 | 9.07492E-39 | 1.46932E-36 |
| ATP5E    | 0.61379963   | 9.4619E-39  | 1.51963E-36 |
| WWC2     | -0.613759102 | 9.59906E-39 | 1.52932E-36 |
| RPS15A   | 0.613484632  | 1.05813E-38 | 1.67243E-36 |
| TXNL4A   | 0.612962011  | 1.27345E-38 | 1.99692E-36 |
| CCDC56   | 0.612859396  | 1.32057E-38 | 2.05462E-36 |
| PSMG3    | 0.612514474  | 1.49194E-38 | 2.30326E-36 |
| MRPL51   | 0.61168402   | 2.00019E-38 | 3.06413E-36 |
| C11orf31 | 0.611653648  | 2.02171E-38 | 3.07347E-36 |
| MEF2A    | -0.611242921 | 2.33638E-38 | 3.52492E-36 |
| SEC61G   | 0.610823715  | 2.7075E-38  | 4.05412E-36 |
| RPS13    | 0.610702399  | 2.82539E-38 | 4.19908E-36 |
| MRPL52   | 0.610510498  | 3.02234E-38 | 4.45851E-36 |
| MAD2L1BP | 0.610167638  | 3.40862E-38 | 4.99137E-36 |

|          |              |             |             |
|----------|--------------|-------------|-------------|
| TTBK2    | -0.609413047 | 4.43933E-38 | 6.45324E-36 |
| PRPF6    | 0.609314335  | 4.5952E-38  | 6.63141E-36 |
| NUDT1    | 0.609104754  | 4.94432E-38 | 7.0839E-36  |
| ZNF366   | -0.609080473 | 4.98643E-38 | 7.0932E-36  |
| PQBP1    | 0.609032713  | 5.07029E-38 | 7.16134E-36 |
| CCDC72   | 0.608816018  | 5.46867E-38 | 7.66961E-36 |
| EXOSC5   | 0.607883996  | 7.56618E-38 | 1.05371E-35 |
| PIK3C2A  | -0.607496033 | 8.65824E-38 | 1.19742E-35 |
| NT5C     | 0.607061571  | 1.00671E-37 | 1.38267E-35 |
| MACF1    | -0.606863822 | 1.07814E-37 | 1.47062E-35 |
| MXD3     | 0.606816759  | 1.09586E-37 | 1.48463E-35 |
| UBA52    | 0.606753797  | 1.12002E-37 | 1.50711E-35 |
| PLEKHG1  | -0.606490519 | 1.22691E-37 | 1.63986E-35 |
| CCDC12   | 0.606462684  | 1.23878E-37 | 1.64469E-35 |
| RPS16    | 0.606386411  | 1.27191E-37 | 1.67748E-35 |
| AARSD1   | 0.606169336  | 1.37105E-37 | 1.79635E-35 |
| NOSIP    | 0.605243943  | 1.88686E-37 | 2.456E-35   |
| RPL29    | 0.604850393  | 2.16064E-37 | 2.7941E-35  |
| CHCHD1   | 0.604750692  | 2.23603E-37 | 2.87293E-35 |
| SPATA13  | -0.604651426 | 2.31367E-37 | 2.95363E-35 |
| PCDHGB7  | -0.604582858 | 2.36885E-37 | 3.00482E-35 |
| RAPGEF6  | -0.604524969 | 2.41645E-37 | 3.03763E-35 |
| CCNT1    | -0.604514419 | 2.42523E-37 | 3.03763E-35 |
| GEMIN6   | 0.604301545  | 2.60921E-37 | 3.24765E-35 |
| OTUD4    | -0.603793257 | 3.10627E-37 | 3.82509E-35 |
| ZBTB43   | -0.603788301 | 3.11155E-37 | 3.82509E-35 |
| RAPGEF2  | -0.60358361  | 3.3376E-37  | 4.07781E-35 |
| TSTD2    | -0.603245005 | 3.74775E-37 | 4.55101E-35 |
| TIMM17B  | 0.603117792  | 3.91441E-37 | 4.72458E-35 |
| SNRPF    | 0.602667558  | 4.56536E-37 | 5.47705E-35 |
| BRMS1    | 0.602501961  | 4.83081E-37 | 5.76081E-35 |
| RUVBL2   | 0.602249031  | 5.26602E-37 | 6.24242E-35 |
| KIAA1012 | -0.602110761 | 5.52011E-37 | 6.50491E-35 |
| C15orf40 | 0.601874936  | 5.98177E-37 | 7.00747E-35 |
| CLTA     | 0.601831774  | 6.07031E-37 | 7.0696E-35  |
| KLHL8    | -0.601799362 | 6.13765E-37 | 7.10647E-35 |
| SAC3D1   | 0.60173623   | 6.27094E-37 | 7.19536E-35 |
| DHX33    | -0.601728863 | 6.28668E-37 | 7.19536E-35 |
| TGFBRAP1 | -0.601614798 | 6.53543E-37 | 7.43732E-35 |
| GEMIN7   | 0.601481277  | 6.83901E-37 | 7.73857E-35 |
| SYNJ1    | -0.601371937 | 7.09796E-37 | 7.98621E-35 |
| DRG1     | 0.601203249  | 7.51663E-37 | 8.40976E-35 |
| PA2G4    | 0.601085503  | 7.82326E-37 | 8.70392E-35 |
| BOLA2    | 0.601003444  | 8.04424E-37 | 8.90005E-35 |
| TOMM7    | 0.599907106  | 1.1662E-36  | 1.28314E-34 |
| ETV3     | -0.599512681 | 1.33244E-36 | 1.45655E-34 |

|           |              |             |             |
|-----------|--------------|-------------|-------------|
| RPSA      | 0.59949939   | 1.33843E-36 | 1.45655E-34 |
| BIRC6     | -0.599268017 | 1.44713E-36 | 1.56628E-34 |
| EIF3B     | 0.59922115   | 1.47019E-36 | 1.57817E-34 |
| KIRREL    | -0.599213539 | 1.47397E-36 | 1.57817E-34 |
| GADD45GIP | 0.599023205  | 1.57165E-36 | 1.67377E-34 |
| MRPL23    | 0.598730088  | 1.73476E-36 | 1.83765E-34 |
| BMPR2     | -0.598559616 | 1.83722E-36 | 1.93588E-34 |
| TBC1D7    | 0.598383629  | 1.94927E-36 | 2.04314E-34 |
| ZBTB8OS   | 0.598356872  | 1.96688E-36 | 2.05081E-34 |
| MFSD2B    | 0.598169166  | 2.09499E-36 | 2.173E-34   |
| SAP30BP   | 0.598117132  | 2.13194E-36 | 2.19987E-34 |
| PIH1D1    | 0.598086383  | 2.15407E-36 | 2.21126E-34 |
| DDI2      | -0.5980063   | 2.2128E-36  | 2.25205E-34 |
| C7orf59   | 0.598001431  | 2.21643E-36 | 2.25205E-34 |
| PSMB4     | 0.597904856  | 2.28948E-36 | 2.31446E-34 |
| RPSAP58   | 0.597786264  | 2.38245E-36 | 2.39629E-34 |
| MRPL27    | 0.597740255  | 2.41952E-36 | 2.42134E-34 |
| LSM4      | 0.597393694  | 2.71768E-36 | 2.70613E-34 |
| GNA11     | -0.596978559 | 3.12302E-36 | 3.09427E-34 |
| KIAA1370  | -0.596813913 | 3.29986E-36 | 3.2533E-34  |
| RPS24     | 0.596639456  | 3.49806E-36 | 3.43172E-34 |
| SNRPD1    | 0.596567735  | 3.58292E-36 | 3.49773E-34 |
| TDP2      | 0.596528304  | 3.63043E-36 | 3.52683E-34 |
| KLHL28    | -0.596507156 | 3.65618E-36 | 3.5346E-34  |
| NDUFS6    | 0.596238622  | 3.99918E-36 | 3.84752E-34 |
| RPS11     | 0.59620525   | 4.04397E-36 | 3.8719E-34  |
| PRELID1   | 0.596109159  | 4.17573E-36 | 3.97893E-34 |
| POP5      | 0.595921755  | 4.44505E-36 | 4.21538E-34 |
| KIDINS220 | -0.595827215 | 4.58736E-36 | 4.32973E-34 |
| RPS23     | 0.5957748    | 4.66819E-36 | 4.38524E-34 |
| MAGI1     | -0.595753618 | 4.70126E-36 | 4.39557E-34 |
| PFDN4     | 0.594973966  | 6.09372E-36 | 5.67086E-34 |
| RNF160    | -0.594954715 | 6.13282E-36 | 5.68071E-34 |
| DNAJC7    | 0.594574662  | 6.95773E-36 | 6.41496E-34 |
| RPS27A    | 0.593596857  | 9.61925E-36 | 8.82799E-34 |
| C9orf41   | -0.593347986 | 1.0444E-35  | 9.54097E-34 |
| CLOCK     | -0.593150107 | 1.11495E-35 | 1.01389E-33 |
| SUPT4H1   | 0.592885768  | 1.21658E-35 | 1.10128E-33 |
| SNRPA     | 0.592843832  | 1.23353E-35 | 1.11157E-33 |
| ZNF791    | -0.592711706 | 1.28846E-35 | 1.15584E-33 |
| UHMK1     | -0.592549126 | 1.35939E-35 | 1.214E-33   |
| KRTCAP2   | 0.592447592  | 1.40563E-35 | 1.24969E-33 |
| SNHG6     | 0.592277937  | 1.48638E-35 | 1.31561E-33 |
| HEATR5A   | -0.591918282 | 1.67308E-35 | 1.47431E-33 |
| CLIC1     | 0.591572187  | 1.87457E-35 | 1.64459E-33 |
| LOC388789 | 0.591510601  | 1.91286E-35 | 1.67082E-33 |

|          |              |             |             |
|----------|--------------|-------------|-------------|
| TUSC2    | 0.591460162  | 1.9448E-35  | 1.6913E-33  |
| ABT1     | 0.591355553  | 2.01273E-35 | 1.74276E-33 |
| MTX1     | 0.591201477  | 2.11707E-35 | 1.82517E-33 |
| TIMM50   | 0.590799398  | 2.41525E-35 | 2.07326E-33 |
| ERN1     | -0.590625756 | 2.55653E-35 | 2.18512E-33 |
| SBNO1    | -0.590560608 | 2.61162E-35 | 2.22267E-33 |
| RPL36    | 0.590123456  | 3.01291E-35 | 2.55328E-33 |
| ABCF1    | 0.589966672  | 3.17122E-35 | 2.67605E-33 |
| NEDD8    | 0.589952073  | 3.18637E-35 | 2.6775E-33  |
| NBPF10   | -0.589839118 | 3.30607E-35 | 2.7664E-33  |
| SHFM1    | 0.589429764  | 3.77831E-35 | 3.14726E-33 |
| PIKFYVE  | -0.589417992 | 3.79283E-35 | 3.14726E-33 |
| RPS5     | 0.589338931  | 3.89182E-35 | 3.216E-33   |
| DOCK5    | -0.589125084 | 4.17256E-35 | 3.43374E-33 |
| C4orf29  | -0.589020326 | 4.3173E-35  | 3.53823E-33 |
| UBXN1    | 0.588972321  | 4.38528E-35 | 3.57922E-33 |
| MYCBP2   | -0.588704662 | 4.78418E-35 | 3.88885E-33 |
| ITPA     | 0.58861063   | 4.93267E-35 | 3.99326E-33 |
| CELF1    | -0.588575726 | 4.98894E-35 | 4.02246E-33 |
| USP53    | -0.588355846 | 5.35832E-35 | 4.30286E-33 |
| ZFPL1    | 0.588214781  | 5.60941E-35 | 4.4864E-33  |
| LEPROT   | -0.587635646 | 6.7681E-35  | 5.39147E-33 |
| GTF2A1   | -0.587518091 | 7.03073E-35 | 5.57836E-33 |
| ASXL2    | -0.587487713 | 7.10021E-35 | 5.61114E-33 |
| C9orf129 | -0.587121443 | 7.99349E-35 | 6.2921E-33  |
| FRYL     | -0.586947343 | 8.45622E-35 | 6.63014E-33 |
| DPM2     | 0.586843273  | 8.74537E-35 | 6.82996E-33 |
| ZNF281   | -0.586464563 | 9.88259E-35 | 7.6726E-33  |
| STK19    | 0.586458678  | 9.90137E-35 | 7.6726E-33  |
| RPL8     | 0.586366424  | 1.02004E-34 | 7.8737E-33  |
| RUNX1T1  | -0.586043369 | 1.13198E-34 | 8.70399E-33 |
| RGPD3    | -0.585492173 | 1.35168E-34 | 1.03534E-32 |
| MRPS23   | 0.585093946  | 1.53618E-34 | 1.17214E-32 |
| KIAA1737 | -0.585008154 | 1.57907E-34 | 1.20028E-32 |
| RRP9     | 0.584958086  | 1.60465E-34 | 1.21508E-32 |
| SOS2     | -0.584924718 | 1.62193E-34 | 1.22351E-32 |
| SHPRH    | -0.584904017 | 1.63274E-34 | 1.22702E-32 |
| SSH1     | -0.584460863 | 1.882E-34   | 1.40903E-32 |
| RPL18    | 0.584426619  | 1.90276E-34 | 1.41923E-32 |
| ATP5G1   | 0.584251778  | 2.01234E-34 | 1.49536E-32 |
| C6orf26  | 0.583982097  | 2.1937E-34  | 1.62407E-32 |
| ZNF641   | -0.583897971 | 2.25352E-34 | 1.66218E-32 |
| PMF1     | 0.583742982  | 2.36798E-34 | 1.73478E-32 |
| FAT4     | -0.583741148 | 2.36936E-34 | 1.73478E-32 |
| ENY2     | 0.58344324   | 2.60589E-34 | 1.90096E-32 |
| PPIH     | 0.583361219  | 2.67502E-34 | 1.94427E-32 |

|           |              |             |             |
|-----------|--------------|-------------|-------------|
| PPIA      | 0.58321361   | 2.80402E-34 | 2.03062E-32 |
| BANF1     | 0.583164643  | 2.84815E-34 | 2.05511E-32 |
| SASH1     | -0.58305571  | 2.94883E-34 | 2.12007E-32 |
| BUD31     | 0.583001398  | 3.00033E-34 | 2.14933E-32 |
| WDR74     | 0.582963388  | 3.0369E-34  | 2.16773E-32 |
| TBCEL     | -0.582920558 | 3.07863E-34 | 2.18968E-32 |
| HIP1      | -0.582817597 | 3.1813E-34  | 2.25465E-32 |
| REL       | -0.581130933 | 5.43585E-34 | 3.83883E-32 |
| ANKRD36BP | -0.58084395  | 5.95279E-34 | 4.18904E-32 |
| SNRPD3    | 0.580610261  | 6.4094E-34  | 4.49448E-32 |
| NOP10     | 0.580439731  | 6.76431E-34 | 4.72671E-32 |
| ZMAT5     | 0.580388492  | 6.8747E-34  | 4.78705E-32 |
| PTRH2     | 0.580205501  | 7.28367E-34 | 5.05416E-32 |
| SYNE1     | -0.579761403 | 8.37898E-34 | 5.79401E-32 |
| NACA      | 0.579744408  | 8.42399E-34 | 5.80497E-32 |
| C17orf95  | 0.579725667  | 8.4739E-34  | 5.81923E-32 |
| C11orf83  | 0.579695659  | 8.55441E-34 | 5.8541E-32  |
| C18orf21  | 0.579684898  | 8.58347E-34 | 5.8541E-32  |
| RPL39     | 0.579637767  | 8.7119E-34  | 5.92142E-32 |
| PPIL1     | 0.579053998  | 1.04692E-33 | 7.09163E-32 |
| RPL35     | 0.578962776  | 1.07738E-33 | 7.27322E-32 |
| NR2C2     | -0.578556287 | 1.22412E-33 | 8.23591E-32 |
| ZNF41     | -0.577737966 | 1.58207E-33 | 1.06037E-31 |
| CASC4     | -0.577728645 | 1.58669E-33 | 1.06037E-31 |
| TSSC4     | 0.577509694  | 1.69921E-33 | 1.13176E-31 |
| POLR2I    | 0.577206237  | 1.8683E-33  | 1.24024E-31 |
| FAM114A1  | -0.577148821 | 1.90211E-33 | 1.25849E-31 |
| PRKG1     | -0.576782056 | 2.13287E-33 | 1.40649E-31 |
| MRPS21    | 0.576464521  | 2.35486E-33 | 1.54776E-31 |
| NDUFB9    | 0.576388361  | 2.41142E-33 | 1.57972E-31 |
| CKS1B     | 0.576154077  | 2.59395E-33 | 1.69372E-31 |
| RPL10A    | 0.576116929  | 2.62413E-33 | 1.70783E-31 |
| MDN1      | -0.575866367 | 2.8369E-33  | 1.84029E-31 |
| RPL31     | 0.575795305  | 2.90029E-33 | 1.8753E-31  |
| OBFC2B    | 0.575439612  | 3.23925E-33 | 2.08211E-31 |
| AATF      | 0.575437824  | 3.24105E-33 | 2.08211E-31 |
| RPS9      | 0.575376746  | 3.30311E-33 | 2.11516E-31 |
| FAM128B   | 0.575049219  | 3.65649E-33 | 2.33394E-31 |
| TAF10     | 0.574788544  | 3.96424E-33 | 2.5223E-31  |
| ZFAND2B   | 0.574555175  | 4.26141E-33 | 2.70274E-31 |
| CCNT2     | -0.574493378 | 4.34372E-33 | 2.7462E-31  |
| PSMC5     | 0.574332452  | 4.56553E-33 | 2.87729E-31 |
| PCDHGA12  | -0.574170375 | 4.80023E-33 | 3.01567E-31 |
| RPS17     | 0.573793771  | 5.39267E-33 | 3.3772E-31  |
| SNRPG     | 0.573743712  | 5.47668E-33 | 3.41059E-31 |
| MYO9A     | -0.573741609 | 5.48023E-33 | 3.41059E-31 |

|          |              |             |             |
|----------|--------------|-------------|-------------|
| RNF168   | -0.573333409 | 6.21581E-33 | 3.85632E-31 |
| PAFAH1B2 | -0.573228536 | 6.42005E-33 | 3.96465E-31 |
| ALG3     | 0.57322339   | 6.43024E-33 | 3.96465E-31 |
| PSMA4    | 0.573064815  | 6.75223E-33 | 4.15033E-31 |
| ELF1     | -0.572902115 | 7.09918E-33 | 4.35016E-31 |
| MAML2    | -0.572822196 | 7.27599E-33 | 4.44483E-31 |
| IMPDH2   | 0.572602056  | 7.78588E-33 | 4.74177E-31 |
| HSPBP1   | 0.572564518  | 7.87629E-33 | 4.7822E-31  |
| SCYL2    | -0.572068357 | 9.17338E-33 | 5.55282E-31 |
| ZNF581   | 0.571978762  | 9.42916E-33 | 5.69036E-31 |
| ZKSCAN1  | -0.571843013 | 9.8302E-33  | 5.91446E-31 |
| MRPS24   | 0.571614409  | 1.0544E-32  | 6.32483E-31 |
| CCNI     | -0.571203919 | 1.19567E-32 | 7.15071E-31 |
| FAM168A  | -0.571164543 | 1.21017E-32 | 7.21574E-31 |
| SYNE2    | -0.571148114 | 1.21627E-32 | 7.23046E-31 |
| EPAS1    | -0.571066843 | 1.2469E-32  | 7.39046E-31 |
| TIMM8B   | 0.571005044  | 1.27069E-32 | 7.50916E-31 |
| DCUN1D1  | -0.570876645 | 1.32158E-32 | 7.78678E-31 |
| TSHZ1    | -0.57059184  | 1.44176E-32 | 8.46983E-31 |
| TLCD1    | 0.570532912  | 1.46795E-32 | 8.59828E-31 |
| POLR2G   | 0.570512401  | 1.47717E-32 | 8.62693E-31 |
| DOCK1    | -0.570182767 | 1.63351E-32 | 9.5121E-31  |
| CNPY2    | 0.570082728  | 1.68412E-32 | 9.77819E-31 |
| CCT3     | 0.569938095  | 1.76003E-32 | 1.01552E-30 |
| MIER1    | -0.569934893 | 1.76175E-32 | 1.01552E-30 |
| EIF2C4   | -0.56993007  | 1.76434E-32 | 1.01552E-30 |
| RPL28    | 0.569648283  | 1.92248E-32 | 1.10335E-30 |
| EXOSC4   | 0.569238474  | 2.17777E-32 | 1.24627E-30 |
| KIAA0754 | -0.568947225 | 2.37931E-32 | 1.35771E-30 |
| ROCK1    | -0.568927038 | 2.39394E-32 | 1.36215E-30 |
| COPS6    | 0.568883627  | 2.42571E-32 | 1.3763E-30  |
| ATP5H    | 0.568108543  | 3.06851E-32 | 1.73606E-30 |
| CHCHD2   | 0.568041738  | 3.13122E-32 | 1.76652E-30 |
| VPS25    | 0.568011315  | 3.16019E-32 | 1.77783E-30 |
| CPEB4    | -0.567836107 | 3.33231E-32 | 1.86938E-30 |
| LIN37    | 0.567818979  | 3.34963E-32 | 1.87382E-30 |
| VPS13C   | -0.567440397 | 3.75589E-32 | 2.0952E-30  |
| RBL2     | -0.567422655 | 3.77608E-32 | 2.10058E-30 |
| MYST4    | -0.567302724 | 3.9154E-32  | 2.17201E-30 |
| MLL5     | -0.566442836 | 5.07468E-32 | 2.80728E-30 |
| EPC1     | -0.566372367 | 5.18352E-32 | 2.85955E-30 |
| PRPF31   | 0.566291955  | 5.31053E-32 | 2.92152E-30 |
| EIF3F    | 0.566200317  | 5.45903E-32 | 2.99495E-30 |
| MRPS16   | 0.566102316  | 5.62238E-32 | 3.07609E-30 |
| ARL6IP4  | 0.566040086  | 5.72861E-32 | 3.12563E-30 |
| 43898    | -0.565974888 | 5.84204E-32 | 3.1788E-30  |



|           |              |             |             |
|-----------|--------------|-------------|-------------|
| KLHL20    | -0.565840636 | 6.08263E-32 | 3.3007E-30  |
| FAU       | 0.565574976  | 6.58796E-32 | 3.5652E-30  |
| RNF5      | 0.565550098  | 6.63736E-32 | 3.5822E-30  |
| COPZ1     | 0.565500683  | 6.73656E-32 | 3.62591E-30 |
| UBL5      | 0.565439958  | 6.86048E-32 | 3.68265E-30 |
| METTL1    | 0.565058036  | 7.69316E-32 | 4.11853E-30 |
| UGCG      | -0.565006827 | 7.81215E-32 | 4.17102E-30 |
| MGAT5     | -0.564903781 | 8.05713E-32 | 4.29031E-30 |
| PPP1R12B  | -0.564893229 | 8.08263E-32 | 4.29242E-30 |
| LOC440957 | 0.564695849  | 8.57481E-32 | 4.54169E-30 |
| KIAA2026  | -0.564487388 | 9.1268E-32  | 4.82123E-30 |
| RPL6      | 0.564201591  | 9.94107E-32 | 5.23747E-30 |
| BAG4      | -0.563915862 | 1.08269E-31 | 5.6891E-30  |
| C17orf79  | 0.563902359  | 1.08706E-31 | 5.69705E-30 |
| SH2B3     | -0.563806877 | 1.11849E-31 | 5.83958E-30 |
| SFRS2IP   | -0.563801998 | 1.12012E-31 | 5.83958E-30 |
| TFPT      | 0.563570795  | 1.20011E-31 | 6.24028E-30 |
| ATP13A3   | -0.563413391 | 1.25778E-31 | 6.52309E-30 |
| PIGU      | 0.5633891    | 1.26692E-31 | 6.55343E-30 |
| SURF2     | 0.563261379  | 1.31607E-31 | 6.79001E-30 |
| RPLP0     | 0.563245825  | 1.32218E-31 | 6.79801E-30 |
| REXO4     | 0.563240079  | 1.32444E-31 | 6.79801E-30 |
| TCEB1     | 0.562979099  | 1.43147E-31 | 7.32848E-30 |
| ADAM10    | -0.56280956  | 1.50554E-31 | 7.6879E-30  |
| WDFY3     | -0.562471126 | 1.6649E-31  | 8.47992E-30 |
| LOC650623 | -0.562439394 | 1.68067E-31 | 8.53841E-30 |
| UBR1      | -0.562121958 | 1.84679E-31 | 9.35849E-30 |
| C17orf89  | 0.561766212  | 2.0523E-31  | 1.03735E-29 |
| FGD4      | -0.561345561 | 2.32463E-31 | 1.17202E-29 |
| HN1       | 0.561115321  | 2.48851E-31 | 1.25148E-29 |
| STRN      | -0.561080794 | 2.51405E-31 | 1.26114E-29 |
| HERC1     | -0.561053441 | 2.53447E-31 | 1.26819E-29 |
| MRPL38    | 0.561000403  | 2.57452E-31 | 1.285E-29   |
| FAM63B    | -0.560965229 | 2.60143E-31 | 1.29519E-29 |
| UXT       | 0.560897276  | 2.65421E-31 | 1.31817E-29 |
| PRR3      | 0.560707909  | 2.80694E-31 | 1.39055E-29 |
| RSPRY1    | -0.560540017 | 2.9496E-31  | 1.4576E-29  |
| RPL5      | 0.560423869  | 3.05246E-31 | 1.5047E-29  |
| HCFC2     | -0.560360071 | 3.11046E-31 | 1.5295E-29  |
| NOP56     | 0.560018397  | 3.44013E-31 | 1.68744E-29 |
| TPRKB     | 0.559998768  | 3.46008E-31 | 1.69306E-29 |
| ERGIC3    | 0.559706088  | 3.77155E-31 | 1.84094E-29 |
| ADAMTS15  | -0.559551537 | 3.94704E-31 | 1.92189E-29 |
| ARHGAP5   | -0.559118564 | 4.48282E-31 | 2.17745E-29 |
| TCEB2     | 0.559056356  | 4.56549E-31 | 2.21221E-29 |
| EIF3K     | 0.559013959  | 4.62269E-31 | 2.23449E-29 |

|          |              |             |             |
|----------|--------------|-------------|-------------|
| DDX56    | 0.558977544  | 4.67239E-31 | 2.25304E-29 |
| AKAP10   | -0.558863854 | 4.83097E-31 | 2.32388E-29 |
| EXOSC7   | 0.558380464  | 5.56675E-31 | 2.67137E-29 |
| AP2S1    | 0.55821665   | 5.84042E-31 | 2.79596E-29 |
| TNRC6B   | -0.557848977 | 6.50399E-31 | 3.10616E-29 |
| ZMYND11  | -0.557520758 | 7.159E-31   | 3.4108E-29  |
| MIP      | 0.557457853  | 7.29178E-31 | 3.46577E-29 |
| MAN1A2   | -0.557374267 | 7.47199E-31 | 3.54297E-29 |
| NME2     | 0.557317452  | 7.59699E-31 | 3.59368E-29 |
| MRPL53   | 0.55718799   | 7.8896E-31  | 3.72325E-29 |
| ACOT8    | 0.557119281  | 8.04939E-31 | 3.78968E-29 |
| RP2      | -0.556801931 | 8.82991E-31 | 4.14187E-29 |
| SPG11    | -0.556798386 | 8.83904E-31 | 4.14187E-29 |
| ZNF800   | -0.556769662 | 8.91335E-31 | 4.16689E-29 |
| DNTTIP1  | 0.556746286  | 8.97428E-31 | 4.18554E-29 |
| WDR70    | 0.556691349  | 9.1191E-31  | 4.24315E-29 |
| DNAJB14  | -0.555961534 | 1.12769E-30 | 5.23493E-29 |
| JMJD1C   | -0.555844568 | 1.16667E-30 | 5.40333E-29 |
| RPS29    | 0.555671617  | 1.22678E-30 | 5.6685E-29  |
| IMMP1L   | 0.555452289  | 1.30741E-30 | 6.02712E-29 |
| LSM7     | 0.555405907  | 1.32513E-30 | 6.09467E-29 |
| C14orf43 | -0.555196378 | 1.40814E-30 | 6.46156E-29 |
| RPL11    | 0.555077969  | 1.45731E-30 | 6.6718E-29  |
| SERF2    | 0.554793078  | 1.58266E-30 | 7.21988E-29 |
| ILKAP    | 0.554789556  | 1.58428E-30 | 7.21988E-29 |
| HECTD1   | -0.554605085 | 1.67116E-30 | 7.59842E-29 |
| SNRPB2   | 0.554451214  | 1.74721E-30 | 7.92615E-29 |
| UBXN4    | -0.554351796 | 1.79817E-30 | 8.13874E-29 |
| BOD1L    | -0.55430518  | 1.82256E-30 | 8.23044E-29 |
| ZDHHC20  | -0.554222637 | 1.86656E-30 | 8.41006E-29 |
| SEC24B   | -0.554177394 | 1.89112E-30 | 8.50149E-29 |
| TMEM223  | 0.554148806  | 1.9068E-30  | 8.54961E-29 |
| YIPF3    | 0.554142264  | 1.91041E-30 | 8.54961E-29 |
| AKAP11   | -0.55407062  | 1.95035E-30 | 8.7088E-29  |
| DMXL1    | -0.554004175 | 1.98813E-30 | 8.85765E-29 |
| NDUFA2   | 0.553956433  | 2.01573E-30 | 8.96054E-29 |
| COX6B1   | 0.553933819  | 2.02893E-30 | 8.99914E-29 |
| EIF3M    | 0.553707093  | 2.16611E-30 | 9.58623E-29 |
| EIF2B4   | 0.55364524   | 2.2051E-30  | 9.73714E-29 |
| BAT3     | 0.553495894  | 2.30212E-30 | 1.01431E-28 |
| MRPL47   | 0.553435589  | 2.34248E-30 | 1.02981E-28 |
| EEF1D    | 0.553393145  | 2.37131E-30 | 1.04019E-28 |
| SS18L2   | 0.553367932  | 2.3886E-30  | 1.04547E-28 |
| NAT9     | 0.553352909  | 2.39896E-30 | 1.0477E-28  |
| KBTBD7   | -0.553272369 | 2.45526E-30 | 1.06995E-28 |
| ACER2    | -0.552951451 | 2.69289E-30 | 1.17094E-28 |

|          |              |             |             |
|----------|--------------|-------------|-------------|
| PTTG1    | 0.552903041  | 2.73066E-30 | 1.18477E-28 |
| RPS2     | 0.552756264  | 2.8484E-30  | 1.23317E-28 |
| ETS1     | -0.55272556  | 2.87365E-30 | 1.2414E-28  |
| RPS19BP1 | 0.552498105  | 3.06777E-30 | 1.32239E-28 |
| PDLIM5   | -0.552171637 | 3.36923E-30 | 1.44921E-28 |
| DRAP1    | 0.552009008  | 3.53015E-30 | 1.51515E-28 |
| PPFIBP1  | -0.551984434 | 3.55511E-30 | 1.52258E-28 |
| BCL7C    | 0.551950101  | 3.59029E-30 | 1.53435E-28 |
| RREB1    | -0.551853413 | 3.6912E-30  | 1.5741E-28  |
| CLASP1   | -0.551746813 | 3.80572E-30 | 1.61946E-28 |
| ALS2CR8  | -0.551726478 | 3.82795E-30 | 1.62545E-28 |
| C12orf47 | 0.551436027  | 4.15999E-30 | 1.76268E-28 |
| DPP8     | -0.551407795 | 4.19374E-30 | 1.77321E-28 |
| WIBG     | 0.551307746  | 4.31555E-30 | 1.82085E-28 |
| TAFIL    | -0.551277761 | 4.35273E-30 | 1.83266E-28 |
| RALY     | 0.551228638  | 4.41433E-30 | 1.85467E-28 |
| ZNHIT3   | 0.551018667  | 4.68749E-30 | 1.96529E-28 |
| ARL16    | 0.550752346  | 5.05809E-30 | 2.11622E-28 |
| PCNX     | -0.550578508 | 5.31547E-30 | 2.21924E-28 |
| PTPN11   | -0.55045749  | 5.50224E-30 | 2.29241E-28 |
| ERAL1    | 0.550350335  | 5.67302E-30 | 2.35863E-28 |
| SARNP    | 0.550264402  | 5.81376E-30 | 2.4121E-28  |
| BTF3     | 0.550246661  | 5.84324E-30 | 2.4193E-28  |
| PHF2     | -0.550152735 | 6.0018E-30  | 2.47979E-28 |
| MRPL9    | 0.54998359   | 6.29815E-30 | 2.59684E-28 |
| MRTO4    | 0.54959373   | 7.03737E-30 | 2.89565E-28 |
| HIPK1    | -0.549525737 | 7.1748E-30  | 2.94611E-28 |
| SSNA1    | 0.54945782   | 7.31473E-30 | 2.99738E-28 |
| NME6     | 0.549357516  | 7.52632E-30 | 3.07776E-28 |
| NBEAL1   | -0.549223488 | 7.81852E-30 | 3.19069E-28 |
| CHCHD8   | 0.549154885  | 7.9724E-30  | 3.24048E-28 |
| C17orf90 | 0.549154591  | 7.97306E-30 | 3.24048E-28 |
| PIK3R1   | -0.54907932  | 8.14535E-30 | 3.2983E-28  |
| UBE2H    | -0.549077978 | 8.14846E-30 | 3.2983E-28  |
| C12orf73 | 0.549029141  | 8.26225E-30 | 3.33758E-28 |
| EP300    | -0.549014949 | 8.29561E-30 | 3.33949E-28 |
| PTOV1    | 0.549012865  | 8.30052E-30 | 3.33949E-28 |
| RPS19    | 0.548658359  | 9.17893E-30 | 3.68545E-28 |
| NBPF14   | -0.548607397 | 9.31254E-30 | 3.72472E-28 |
| USMG5    | 0.548606794  | 9.31413E-30 | 3.72472E-28 |
| GPATCH3  | 0.548574601  | 9.39954E-30 | 3.75134E-28 |
| TCF12    | -0.548557162 | 9.44612E-30 | 3.76239E-28 |
| AKAP13   | -0.548391097 | 9.90133E-30 | 3.93583E-28 |
| JAGN1    | 0.548279237  | 1.02201E-29 | 4.05445E-28 |
| C11orf10 | 0.548166913  | 1.05504E-29 | 4.17716E-28 |
| NBPF9    | -0.548136628 | 1.06412E-29 | 4.20477E-28 |

|           |              |             |             |
|-----------|--------------|-------------|-------------|
| FRMD4B    | -0.547942778 | 1.12413E-29 | 4.43309E-28 |
| NEU3      | -0.547513765 | 1.26908E-29 | 4.99482E-28 |
| VPS72     | 0.54743707   | 1.29688E-29 | 5.09414E-28 |
| ATG2B     | -0.547311087 | 1.34384E-29 | 5.26822E-28 |
| PPAP2B    | -0.546818845 | 1.544E-29   | 6.04103E-28 |
| FNDC3A    | -0.546744849 | 1.57654E-29 | 6.15623E-28 |
| RPS3      | 0.546584375  | 1.64944E-29 | 6.4283E-28  |
| C1orf35   | 0.546520893  | 1.67919E-29 | 6.53146E-28 |
| C17orf37  | 0.546069833  | 1.9064E-29  | 7.40076E-28 |
| OST4      | 0.545873079  | 2.01478E-29 | 7.8063E-28  |
| PROX1     | -0.545815165 | 2.04783E-29 | 7.91086E-28 |
| ANKRD17   | -0.545811891 | 2.04971E-29 | 7.91086E-28 |
| LOC284441 | -0.545579611 | 2.18785E-29 | 8.42767E-28 |
| PDCD5     | 0.545540165  | 2.21221E-29 | 8.50504E-28 |
| METTL5    | 0.545406518  | 2.29673E-29 | 8.81299E-28 |
| KIAA0494  | -0.544950206 | 2.6101E-29  | 9.99619E-28 |
| FAM13C    | -0.544711461 | 2.79053E-29 | 1.06667E-27 |
| WASH2P    | 0.544568576  | 2.90434E-29 | 1.10805E-27 |
| NHSL2     | -0.54435425  | 3.08372E-29 | 1.17423E-27 |
| PSENNEN   | 0.544255776  | 3.16977E-29 | 1.20469E-27 |
| NHLRC2    | -0.544183677 | 3.23427E-29 | 1.22687E-27 |
| ARFGEF2   | -0.544122817 | 3.28972E-29 | 1.24553E-27 |
| LONP2     | -0.544115278 | 3.29665E-29 | 1.24579E-27 |
| SF3B14    | 0.544003753  | 3.40094E-29 | 1.28276E-27 |
| PCDHGB2   | -0.54395965  | 3.44307E-29 | 1.2962E-27  |
| LRCH1     | -0.543838538 | 3.56144E-29 | 1.33823E-27 |
| QARS      | 0.543747379  | 3.65318E-29 | 1.37011E-27 |
| RPS15     | 0.543668181  | 3.73477E-29 | 1.39808E-27 |
| NHP2L1    | 0.543626711  | 3.77822E-29 | 1.41169E-27 |
| RPP30     | 0.543403988  | 4.0202E-29  | 1.4993E-27  |
| SNRPA1    | 0.543331479  | 4.10224E-29 | 1.52703E-27 |
| GAS5      | 0.543110337  | 4.3628E-29  | 1.62099E-27 |
| PGP       | 0.542994121  | 4.50621E-29 | 1.67116E-27 |
| DDR2      | -0.542960963 | 4.54797E-29 | 1.68351E-27 |
| RNF169    | -0.542940585 | 4.57383E-29 | 1.68813E-27 |
| GOLGA4    | -0.542937773 | 4.57741E-29 | 1.68813E-27 |
| NCOA2     | -0.542779075 | 4.78397E-29 | 1.76105E-27 |
| MRPL43    | 0.542218044  | 5.59078E-29 | 2.05425E-27 |
| RBAK      | -0.542171742 | 5.66308E-29 | 2.07699E-27 |
| LMTK2     | -0.541928955 | 6.05758E-29 | 2.21759E-27 |
| TEAD1     | -0.541855034 | 6.183E-29   | 2.25935E-27 |
| TAOK1     | -0.541847897 | 6.19524E-29 | 2.25968E-27 |
| HRAS      | 0.541799991  | 6.27805E-29 | 2.28569E-27 |
| GOLIM4    | -0.54161516  | 6.60791E-29 | 2.4014E-27  |
| C9orf119  | 0.54153869   | 6.74934E-29 | 2.44833E-27 |
| EDF1      | 0.541511166  | 6.80097E-29 | 2.46257E-27 |

|           |              |             |             |
|-----------|--------------|-------------|-------------|
| MRPS18B   | 0.541478202  | 6.86333E-29 | 2.48064E-27 |
| POP7      | 0.541132071  | 7.55312E-29 | 2.72501E-27 |
| MRPL17    | 0.540998106  | 7.8381E-29  | 2.82271E-27 |
| MIA2      | -0.540935707 | 7.97444E-29 | 2.86662E-27 |
| SIRPB1    | -0.540798571 | 8.28237E-29 | 2.97195E-27 |
| C12orf10  | 0.540750354  | 8.3934E-29  | 3.00638E-27 |
| DPY19L3   | -0.540734185 | 8.43096E-29 | 3.01441E-27 |
| GNB2L1    | 0.540713682  | 8.47883E-29 | 3.02609E-27 |
| C12orf51  | -0.540693853 | 8.52539E-29 | 3.03726E-27 |
| ZNF462    | -0.540499092 | 8.99625E-29 | 3.19929E-27 |
| CKLF      | 0.540403406  | 9.2369E-29  | 3.27902E-27 |
| MRPL48    | 0.54022617   | 9.69958E-29 | 3.43714E-27 |
| PSMC1     | 0.540209249  | 9.74493E-29 | 3.44707E-27 |
| BCL2L12   | 0.540112269  | 1.00089E-28 | 3.53418E-27 |
| DPY30     | 0.539960601  | 1.0436E-28  | 3.67847E-27 |
| NME2P1    | 0.539930454  | 1.0523E-28  | 3.70258E-27 |
| PIK3CA    | -0.539832071 | 1.0812E-28  | 3.79755E-27 |
| LATS2     | -0.539596328 | 1.15367E-28 | 4.04497E-27 |
| TLR3      | -0.53948096  | 1.19087E-28 | 4.16805E-27 |
| PTPLB     | -0.539368179 | 1.22838E-28 | 4.29178E-27 |
| ATP5I     | 0.538775563  | 1.44548E-28 | 5.04145E-27 |
| C20orf199 | 0.538620927  | 1.5081E-28  | 5.25068E-27 |
| C11orf30  | -0.538557388 | 1.53461E-28 | 5.33363E-27 |
| MRPS17    | 0.537715346  | 1.93247E-28 | 6.70472E-27 |
| XRCC6     | 0.537523236  | 2.03664E-28 | 7.05386E-27 |
| RRP1      | 0.537262743  | 2.1868E-28  | 7.54818E-27 |
| HEATR5B   | -0.537262497 | 2.18695E-28 | 7.54818E-27 |
| MED13L    | -0.536973761 | 2.3662E-28  | 8.15274E-27 |
| SLC30A4   | -0.536899244 | 2.41477E-28 | 8.30572E-27 |
| PUF60     | 0.536844976  | 2.45076E-28 | 8.41497E-27 |
| CALD1     | -0.536784256 | 2.49165E-28 | 8.54067E-27 |
| C7orf47   | 0.536550047  | 2.65582E-28 | 9.08773E-27 |
| POLK      | -0.536538233 | 2.66437E-28 | 9.10138E-27 |
| MANBAL    | 0.535986263  | 3.09609E-28 | 1.0558E-26  |
| C19orf48  | 0.535871556  | 3.19412E-28 | 1.08737E-26 |
| GBAP1     | 0.535757296  | 3.29482E-28 | 1.11973E-26 |
| CCT7      | 0.535715023  | 3.33286E-28 | 1.13073E-26 |
| FAM128A   | 0.53559776   | 3.44068E-28 | 1.16533E-26 |
| ROCK2     | -0.535540937 | 3.49416E-28 | 1.18143E-26 |
| RIF1      | -0.535420738 | 3.61E-28    | 1.21733E-26 |
| EIF3G     | 0.535418132  | 3.61256E-28 | 1.21733E-26 |
| LENG1     | 0.535137578  | 3.89812E-28 | 1.31133E-26 |
| NXT1      | 0.534999608  | 4.04661E-28 | 1.35899E-26 |
| MYSM1     | -0.534959369 | 4.09097E-28 | 1.37158E-26 |
| BIRC5     | 0.534953142  | 4.09787E-28 | 1.37158E-26 |
| CTNND1    | -0.534920895 | 4.13382E-28 | 1.38129E-26 |

|           |              |             |             |
|-----------|--------------|-------------|-------------|
| MTMR6     | -0.534887741 | 4.17111E-28 | 1.39142E-26 |
| POLR2J    | 0.534841692  | 4.22344E-28 | 1.40652E-26 |
| MKL2      | -0.534585545 | 4.52664E-28 | 1.50498E-26 |
| RPS12     | 0.534570385  | 4.54524E-28 | 1.50864E-26 |
| WDR7      | -0.534516934 | 4.61144E-28 | 1.52807E-26 |
| RING1     | 0.534398316  | 4.76176E-28 | 1.57526E-26 |
| NLE1      | 0.534380087  | 4.78529E-28 | 1.58041E-26 |
| C4orf41   | -0.5342986   | 4.89187E-28 | 1.61294E-26 |
| TIMM10    | 0.534186186  | 5.04275E-28 | 1.65994E-26 |
| MRPS7     | 0.534171281  | 5.0631E-28  | 1.66389E-26 |
| BDP1      | -0.534144615 | 5.09971E-28 | 1.67315E-26 |
| UQCRB     | 0.534138529  | 5.1081E-28  | 1.67315E-26 |
| UBE2M     | 0.534059574  | 5.2182E-28  | 1.70641E-26 |
| POP4      | 0.533786532  | 5.61735E-28 | 1.83393E-26 |
| TOMM40    | 0.533674447  | 5.7898E-28  | 1.88713E-26 |
| MYLK      | -0.533656356 | 5.81812E-28 | 1.89327E-26 |
| RNF25     | 0.533548227  | 5.99026E-28 | 1.9461E-26  |
| ARHGAP21  | -0.533374527 | 6.27738E-28 | 2.03606E-26 |
| TBC1D8B   | -0.533248582 | 6.49402E-28 | 2.1029E-26  |
| USP38     | -0.532937265 | 7.06172E-28 | 2.28302E-26 |
| LATS1     | -0.532840738 | 7.2475E-28  | 2.33929E-26 |
| MAPK8     | -0.532780157 | 7.36655E-28 | 2.37387E-26 |
| ARHGAP29  | -0.532417997 | 8.11962E-28 | 2.61232E-26 |
| NDUFA11   | 0.532329521  | 8.31486E-28 | 2.66749E-26 |
| RP9P      | 0.532328161  | 8.3179E-28  | 2.66749E-26 |
| OSBP      | -0.532057075 | 8.94566E-28 | 2.86419E-26 |
| ATP5J2    | 0.532048509  | 8.96624E-28 | 2.86617E-26 |
| NCAPH2    | 0.532036536  | 8.99508E-28 | 2.87079E-26 |
| KIAA1432  | -0.532017809 | 9.04039E-28 | 2.88063E-26 |
| FAM195B   | 0.531902614  | 9.32404E-28 | 2.96627E-26 |
| RPL13AP20 | 0.531859519  | 9.4324E-28  | 2.99595E-26 |
| PDRG1     | 0.531826617  | 9.51596E-28 | 3.01768E-26 |
| TIMM9     | 0.531805506  | 9.56997E-28 | 3.02998E-26 |
| ZFP91     | -0.531647384 | 9.98419E-28 | 3.15611E-26 |
| DAZAP1    | 0.531489259  | 1.04161E-27 | 3.28744E-26 |
| PRDX5     | 0.531434791  | 1.05691E-27 | 3.33045E-26 |
| CPSF4     | 0.531386523  | 1.07066E-27 | 3.36843E-26 |
| TRPM7     | -0.531266833 | 1.10551E-27 | 3.47259E-26 |
| RPL18A    | 0.531237833  | 1.11412E-27 | 3.49413E-26 |
| STRN3     | -0.531181785 | 1.13095E-27 | 3.54134E-26 |
| RC3H2     | -0.53079487  | 1.25419E-27 | 3.92107E-26 |
| METTL14   | -0.530489975 | 1.36057E-27 | 4.24698E-26 |
| C19orf56  | 0.530384611  | 1.39936E-27 | 4.36124E-26 |
| HNRNPA1   | 0.53027311   | 1.44161E-27 | 4.48588E-26 |
| RGPD4     | -0.530201374 | 1.46945E-27 | 4.56538E-26 |
| SLK       | -0.530127036 | 1.49886E-27 | 4.6495E-26  |

|           |              |             |             |
|-----------|--------------|-------------|-------------|
| SON       | -0.529862452 | 1.60834E-27 | 4.98135E-26 |
| PHPT1     | 0.529761136  | 1.65232E-27 | 5.10962E-26 |
| NEU1      | 0.529541017  | 1.75201E-27 | 5.40949E-26 |
| CD320     | 0.529184225  | 1.92635E-27 | 5.93858E-26 |
| CDK5RAP1  | 0.529106609  | 1.96648E-27 | 6.05294E-26 |
| CSGALNACT | -0.52905638  | 1.9929E-27  | 6.12478E-26 |
| GTF2H4    | 0.529001825  | 2.02198E-27 | 6.20244E-26 |
| NACA2     | 0.528997336  | 2.0244E-27  | 6.20244E-26 |
| PEAR1     | -0.528971064 | 2.03857E-27 | 6.23627E-26 |
| C14orf2   | 0.528937547  | 2.05679E-27 | 6.27631E-26 |
| CCDC137   | 0.528935408  | 2.05796E-27 | 6.27631E-26 |
| XRN1      | -0.528922755 | 2.06489E-27 | 6.2878E-26  |
| RSF1      | -0.528885288 | 2.08553E-27 | 6.34096E-26 |
| LOC646471 | -0.528294808 | 2.43907E-27 | 7.40458E-26 |
| MFHAS1    | -0.528144442 | 2.53817E-27 | 7.69371E-26 |
| NENF      | 0.527839051  | 2.75185E-27 | 8.32874E-26 |
| SBF2      | -0.527679132 | 2.87073E-27 | 8.67536E-26 |
| GTF2I     | -0.527643216 | 2.89812E-27 | 8.74486E-26 |
| IPMK      | -0.527396959 | 3.09299E-27 | 9.31874E-26 |
| DAD1      | 0.52734006   | 3.13982E-27 | 9.44555E-26 |
| TTC37     | -0.527224229 | 3.23734E-27 | 9.72422E-26 |
| MRPL22    | 0.527085385  | 3.35818E-27 | 1.0072E-25  |
| EIF2AK3   | -0.52698424  | 3.449E-27   | 1.03288E-25 |
| TRIM56    | -0.526833561 | 3.58881E-27 | 1.07314E-25 |
| TMF1      | -0.526760013 | 3.65907E-27 | 1.09251E-25 |
| UBE2S     | 0.526734189  | 3.68406E-27 | 1.09833E-25 |
| SHARPIN   | 0.526625245  | 3.79136E-27 | 1.12862E-25 |
| MAST4     | -0.526571394 | 3.84554E-27 | 1.14304E-25 |
| ERBB2IP   | -0.526549852 | 3.86742E-27 | 1.14783E-25 |
| MRPL55    | 0.52647369   | 3.94578E-27 | 1.16935E-25 |
| RPL41     | 0.526197454  | 4.24337E-27 | 1.25484E-25 |
| MRPL12    | 0.526194337  | 4.24685E-27 | 1.25484E-25 |
| NUTF2     | 0.525996843  | 4.47328E-27 | 1.31978E-25 |
| MORC3     | -0.525829186 | 4.67482E-27 | 1.3772E-25  |
| PATL1     | -0.52581358  | 4.69403E-27 | 1.37898E-25 |
| SART1     | 0.525813029  | 4.69471E-27 | 1.37898E-25 |
| SDCCAG1   | -0.525776473 | 4.74002E-27 | 1.39024E-25 |
| RBX1      | 0.525657442  | 4.89057E-27 | 1.43027E-25 |
| TMEM184C  | -0.525657224 | 4.89085E-27 | 1.43027E-25 |
| EIF2S2    | 0.525638899  | 4.91444E-27 | 1.43506E-25 |
| POC1A     | 0.525614724  | 4.94574E-27 | 1.44133E-25 |
| ZBTB1     | -0.525611145 | 4.95039E-27 | 1.44133E-25 |
| KLHDC10   | -0.525598066 | 4.96742E-27 | 1.44323E-25 |
| SSSCA1    | 0.525592849  | 4.97423E-27 | 1.44323E-25 |
| C16orf42  | 0.525589472  | 4.97864E-27 | 1.44323E-25 |
| RPL4      | 0.525433733  | 5.1864E-27  | 1.50127E-25 |

|           |              |             |             |
|-----------|--------------|-------------|-------------|
| ENTPD4    | -0.525208931 | 5.50146E-27 | 1.59015E-25 |
| PDE10A    | -0.524866183 | 6.01854E-27 | 1.73709E-25 |
| MICAL2    | -0.524690409 | 6.30204E-27 | 1.81628E-25 |
| SSFA2     | -0.524478604 | 6.66121E-27 | 1.91702E-25 |
| ITGB3     | -0.524433569 | 6.74015E-27 | 1.93694E-25 |
| RP9       | 0.524345929  | 6.89642E-27 | 1.97677E-25 |
| C19orf53  | 0.524344725  | 6.89859E-27 | 1.97677E-25 |
| THOC4     | 0.524328563  | 6.92781E-27 | 1.98229E-25 |
| GMPPA     | 0.524288476  | 7.0008E-27  | 2.0003E-25  |
| ZNF236    | -0.52414477  | 7.26876E-27 | 2.07389E-25 |
| MTM1      | -0.52400326  | 7.54252E-27 | 2.14892E-25 |
| SMARCAD1  | -0.523891143 | 7.76662E-27 | 2.2096E-25  |
| KIAA2018  | -0.52363765  | 8.29782E-27 | 2.35736E-25 |
| SETX      | -0.523577031 | 8.43007E-27 | 2.39152E-25 |
| DYNLL1    | 0.523468954  | 8.67105E-27 | 2.45638E-25 |
| ERC1      | -0.523449449 | 8.71525E-27 | 2.4654E-25  |
| TXLNG     | -0.523394209 | 8.84166E-27 | 2.49761E-25 |
| SLC41A2   | -0.523273023 | 9.12536E-27 | 2.5741E-25  |
| TSC22D2   | -0.523133836 | 9.46231E-27 | 2.66537E-25 |
| FBXO34    | -0.523021713 | 9.74264E-27 | 2.74046E-25 |
| RPL15     | 0.522905979  | 1.00406E-26 | 2.82029E-25 |
| MAN2A1    | -0.522701193 | 1.059E-26   | 2.97043E-25 |
| MTCH1     | 0.52269074   | 1.06189E-26 | 2.97433E-25 |
| SLC38A7   | -0.522384183 | 1.14996E-26 | 3.2165E-25  |
| ARL13B    | -0.522200581 | 1.20613E-26 | 3.36886E-25 |
| NPRL2     | 0.522079195  | 1.24474E-26 | 3.47184E-25 |
| ARID1B    | -0.522015614 | 1.26544E-26 | 3.52466E-25 |
| PRKAR2A   | -0.521942103 | 1.28981E-26 | 3.58751E-25 |
| SNX13     | -0.521918742 | 1.29765E-26 | 3.60428E-25 |
| MICALCL   | -0.521693224 | 1.37579E-26 | 3.81601E-25 |
| MRPL28    | 0.521598632  | 1.40994E-26 | 3.90527E-25 |
| MRPL24    | 0.521356858  | 1.50106E-26 | 4.15188E-25 |
| PSMA6     | 0.521332129  | 1.5107E-26  | 4.17275E-25 |
| ATRX      | -0.52130838  | 1.52001E-26 | 4.19267E-25 |
| BGLAP     | 0.521258013  | 1.53996E-26 | 4.2411E-25  |
| ARPC4     | 0.521253325  | 1.54183E-26 | 4.2411E-25  |
| NCRNA0015 | 0.521189236  | 1.56762E-26 | 4.30608E-25 |
| AFF1      | -0.521077974 | 1.6134E-26  | 4.42573E-25 |
| TUBB      | 0.521047443  | 1.62619E-26 | 4.45468E-25 |
| JTB       | 0.520998612  | 1.64686E-26 | 4.5051E-25  |
| TRIM27    | 0.520967317  | 1.66024E-26 | 4.53548E-25 |
| MRPS10    | 0.520547829  | 1.85032E-26 | 5.04781E-25 |
| BLOC1S1   | 0.520159004  | 2.0456E-26  | 5.57294E-25 |
| GPR176    | -0.51999805  | 2.13131E-26 | 5.79229E-25 |
| MON2      | -0.519998672 | 2.13193E-26 | 5.79229E-25 |
| TIMM13    | 0.519988211  | 2.13769E-26 | 5.80002E-25 |



|           |              |             |             |
|-----------|--------------|-------------|-------------|
| THOC7     | 0.519962932  | 2.15166E-26 | 5.82999E-25 |
| NACAP1    | 0.519797983  | 2.24508E-26 | 6.07483E-25 |
| SCAMP3    | 0.51945088   | 2.45492E-26 | 6.63362E-25 |
| PSMB7     | 0.519431513  | 2.46719E-26 | 6.65772E-25 |
| DDAH2     | 0.519389261  | 2.49415E-26 | 6.72138E-25 |
| NSMCE2    | 0.519225336  | 2.60154E-26 | 6.99786E-25 |
| RPA3      | 0.519221993  | 2.60377E-26 | 6.99786E-25 |
| LEMD2     | 0.519026632  | 2.73784E-26 | 7.34827E-25 |
| SF3B5     | 0.5189989    | 2.75742E-26 | 7.39085E-25 |
| KLHL11    | -0.518749418 | 2.93986E-26 | 7.86925E-25 |
| ZNF295    | -0.518711874 | 2.96832E-26 | 7.93479E-25 |
| ADAT1     | -0.51853944  | 3.1026E-26  | 8.28261E-25 |
| EIF4E2    | 0.518408988  | 3.20815E-26 | 8.55293E-25 |
| SDF2      | 0.518325584  | 3.27749E-26 | 8.70638E-25 |
| C14orf153 | 0.518324177  | 3.27867E-26 | 8.70638E-25 |
| CDKL5     | -0.518323986 | 3.27883E-26 | 8.70638E-25 |
| HMGA1     | 0.518290388  | 3.30719E-26 | 8.76999E-25 |
| GPS1      | 0.518154422  | 3.42444E-26 | 9.06885E-25 |
| FCHO2     | -0.518007755 | 3.55552E-26 | 9.40349E-25 |
| RBM34     | 0.518001928  | 3.56083E-26 | 9.40504E-25 |
| ATM       | -0.517880046 | 3.67369E-26 | 9.69027E-25 |
| URM1      | 0.517799026  | 3.75065E-26 | 9.8802E-25  |
| ZNF192    | -0.517675635 | 3.87094E-26 | 1.01836E-24 |
| TRIO      | -0.517611239 | 3.93522E-26 | 1.0339E-24  |
| TAF1      | -0.517552922 | 3.99434E-26 | 1.04805E-24 |
| JAK1      | -0.517509758 | 4.03866E-26 | 1.05829E-24 |
| ATXN7     | -0.517412322 | 4.1405E-26  | 1.08355E-24 |
| RPL7A     | 0.517218012  | 4.35123E-26 | 1.1372E-24  |
| ZNF609    | -0.517181388 | 4.39212E-26 | 1.14638E-24 |
| ATRIP     | 0.517114875  | 4.46734E-26 | 1.16449E-24 |
| TMEM126A  | 0.517050112  | 4.54181E-26 | 1.18236E-24 |
| LDLRAD3   | -0.517005235 | 4.59413E-26 | 1.19441E-24 |
| CYHR1     | 0.516854511  | 4.77425E-26 | 1.23962E-24 |
| USO1      | -0.516844798 | 4.78609E-26 | 1.24107E-24 |
| NANS      | 0.516839739  | 4.79227E-26 | 1.24107E-24 |
| LOC653653 | -0.516800457 | 4.84053E-26 | 1.25194E-24 |
| LOC150786 | -0.516466227 | 5.27099E-26 | 1.3615E-24  |
| COX6C     | 0.516381063  | 5.38658E-26 | 1.38956E-24 |
| PRKCE     | -0.516328114 | 5.45971E-26 | 1.4066E-24  |
| NUDC      | 0.516191463  | 5.65298E-26 | 1.45451E-24 |
| LOC100288 | 0.516115139  | 5.76386E-26 | 1.48113E-24 |
| ATP5EP2   | 0.515966775  | 5.98557E-26 | 1.53612E-24 |
| SGK269    | -0.515779472 | 6.27751E-26 | 1.60897E-24 |
| SMUG1     | 0.515767214  | 6.2971E-26  | 1.61191E-24 |
| TEK       | -0.51569181  | 6.41894E-26 | 1.64099E-24 |
| VPS28     | 0.515676333  | 6.44423E-26 | 1.64534E-24 |

|           |              |             |             |
|-----------|--------------|-------------|-------------|
| PDE3A     | -0.515359988 | 6.98331E-26 | 1.7807E-24  |
| CDH5      | -0.515310487 | 7.0716E-26  | 1.80091E-24 |
| AHCYL2    | -0.515284468 | 7.11845E-26 | 1.81052E-24 |
| ATIC      | 0.515279268  | 7.12785E-26 | 1.8106E-24  |
| ZNF622    | 0.515255704  | 7.1706E-26  | 1.81914E-24 |
| SPATA24   | 0.515211102  | 7.2522E-26  | 1.8375E-24  |
| TMEM160   | 0.515149862  | 7.36575E-26 | 1.8639E-24  |
| RPL13     | 0.515052217  | 7.55043E-26 | 1.90821E-24 |
| KIAA0564  | -0.514812856 | 8.02269E-26 | 2.02499E-24 |
| ANKRD19   | 0.514505952  | 8.67109E-26 | 2.18588E-24 |
| FTSJD1    | -0.514358307 | 9.00118E-26 | 2.26623E-24 |
| ICT1      | 0.513986645  | 9.88802E-26 | 2.48636E-24 |
| MPZL3     | -0.513949305 | 9.98174E-26 | 2.50676E-24 |
| KIAA1632  | -0.513839775 | 1.02618E-25 | 2.57384E-24 |
| PDZD8     | -0.513788205 | 1.03963E-25 | 2.6043E-24  |
| EEF1G     | 0.51373055   | 1.05487E-25 | 2.63917E-24 |
| C20orf27  | 0.513647792  | 1.07714E-25 | 2.6915E-24  |
| MUDENG    | -0.513601487 | 1.0898E-25  | 2.71973E-24 |
| N4BP2     | -0.513580822 | 1.0955E-25  | 2.73053E-24 |
| LOC100271 | 0.513492495  | 1.12019E-25 | 2.78857E-24 |
| ATF2      | -0.513422869 | 1.14003E-25 | 2.83443E-24 |
| TECTA     | -0.513305507 | 1.17428E-25 | 2.91593E-24 |
| LSM5      | 0.513181575  | 1.21154E-25 | 3.0047E-24  |
| RSC1A1    | -0.513148107 | 1.2218E-25  | 3.02638E-24 |
| DDX49     | 0.513018086  | 1.26248E-25 | 3.12327E-24 |
| PTAR1     | -0.512993345 | 1.27037E-25 | 3.13889E-24 |
| MRPS15    | 0.512958536  | 1.28156E-25 | 3.16261E-24 |
| EIF2B5    | 0.512782233  | 1.33972E-25 | 3.30204E-24 |
| SLIT2     | -0.512761615 | 1.34669E-25 | 3.31512E-24 |
| C11orf51  | 0.512723294  | 1.35974E-25 | 3.34311E-24 |
| MYL6      | 0.512664402  | 1.38004E-25 | 3.38883E-24 |
| KIAA1033  | -0.512525017 | 1.42928E-25 | 3.50542E-24 |
| SNRNP35   | 0.512405596  | 1.47284E-25 | 3.60782E-24 |
| LOC100132 | -0.512371394 | 1.48555E-25 | 3.6345E-24  |
| LOC442454 | 0.512342888  | 1.49623E-25 | 3.65614E-24 |
| SDHAF2    | 0.512090021  | 1.59436E-25 | 3.89114E-24 |
| WDR11     | -0.512066796 | 1.60369E-25 | 3.90911E-24 |
| HEG1      | -0.511848296 | 1.69409E-25 | 4.12443E-24 |
| PRDM2     | -0.511823575 | 1.70463E-25 | 4.14502E-24 |
| SMG1      | -0.511801783 | 1.71397E-25 | 4.16266E-24 |
| PALM2-AKA | -0.511750849 | 1.73601E-25 | 4.21105E-24 |
| DMAP1     | 0.511224247  | 1.98091E-25 | 4.79925E-24 |
| RNF111    | -0.510998307 | 2.09616E-25 | 5.0723E-24  |
| TMEM183A  | 0.510911721  | 2.14206E-25 | 5.17708E-24 |
| C7orf58   | -0.510894511 | 2.1513E-25  | 5.19311E-24 |
| PSMC3     | 0.510709561  | 2.25312E-25 | 5.43231E-24 |

|           |              |             |             |
|-----------|--------------|-------------|-------------|
| CLCN3     | -0.510581766 | 2.32624E-25 | 5.60182E-24 |
| LIMS1     | -0.510567872 | 2.33433E-25 | 5.61451E-24 |
| BAZ2B     | -0.510532263 | 2.35519E-25 | 5.65785E-24 |
| NSMCE1    | 0.510467833  | 2.3934E-25  | 5.74271E-24 |
| MRPL33    | 0.510399916  | 2.43434E-25 | 5.83392E-24 |
| TRUB1     | -0.510323997 | 2.48092E-25 | 5.93841E-24 |
| SETBP1    | -0.510053552 | 2.65412E-25 | 6.34536E-24 |
| THOC6     | 0.50997376   | 2.70746E-25 | 6.46512E-24 |
| C14orf156 | 0.509820326  | 2.81303E-25 | 6.70916E-24 |
| TRIP11    | -0.509753315 | 2.8604E-25  | 6.81397E-24 |
| HM13      | 0.50955135   | 3.00798E-25 | 7.15697E-24 |
| SETD7     | -0.509494222 | 3.05107E-25 | 7.25083E-24 |
| PPP2R5E   | -0.509467534 | 3.0714E-25  | 7.29047E-24 |
| INO80C    | 0.509324209  | 3.18294E-25 | 7.54622E-24 |
| ZNF423    | -0.509238082 | 3.25188E-25 | 7.70049E-24 |
| TAF13     | -0.50921972  | 3.26676E-25 | 7.72655E-24 |
| PSD3      | -0.509205451 | 3.27838E-25 | 7.74483E-24 |
| TMEM199   | 0.509188013  | 3.29263E-25 | 7.76927E-24 |
| EMP1      | -0.509150431 | 3.32354E-25 | 7.83248E-24 |
| PTDSS2    | 0.509145916  | 3.32728E-25 | 7.83248E-24 |
| CDKN2AIP  | -0.509138907 | 3.33308E-25 | 7.83688E-24 |
| LIG4      | -0.509126912 | 3.34304E-25 | 7.85102E-24 |
| ZNF689    | -0.509049455 | 3.40804E-25 | 7.99425E-24 |
| RASA2     | -0.509030263 | 3.42434E-25 | 8.02303E-24 |
| ADSL      | 0.508769168  | 3.65386E-25 | 8.55071E-24 |
| MYO18A    | -0.508706629 | 3.71105E-25 | 8.67435E-24 |
| COMMD9    | 0.508701673  | 3.71562E-25 | 8.67485E-24 |
| EDIL3     | -0.508485947 | 3.92E-25    | 9.14131E-24 |
| COX7C     | 0.508162149  | 4.24776E-25 | 9.89406E-24 |
| RPL22     | 0.508133762  | 4.27776E-25 | 9.95228E-24 |
| PES1      | 0.508044793  | 4.37312E-25 | 1.01623E-23 |
| TET2      | -0.507853586 | 4.58521E-25 | 1.06427E-23 |
| GPR17     | -0.507626071 | 4.85084E-25 | 1.12461E-23 |
| FAM179B   | -0.50751911  | 4.9809E-25  | 1.15343E-23 |
| PSMA7     | 0.507456979  | 5.05803E-25 | 1.16993E-23 |
| LMBRD2    | -0.50743842  | 5.0813E-25  | 1.17237E-23 |
| RPL13A    | 0.507435232  | 5.08531E-25 | 1.17237E-23 |
| C3orf10   | 0.507434461  | 5.08627E-25 | 1.17237E-23 |
| NDUFB7    | 0.507395456  | 5.13557E-25 | 1.18237E-23 |
| ORMDL2    | 0.506975872  | 5.69652E-25 | 1.31E-23    |
| EEF1B2    | 0.506472811  | 6.44921E-25 | 1.48139E-23 |
| ITSN2     | -0.506399654 | 6.56655E-25 | 1.5066E-23  |
| NFKB1     | -0.506371016 | 6.61305E-25 | 1.51552E-23 |
| KLF10     | -0.50635741  | 6.63526E-25 | 1.51886E-23 |
| OSBPL11   | -0.506326912 | 6.68531E-25 | 1.52856E-23 |
| TOR1AIP2  | -0.506168502 | 6.95131E-25 | 1.58756E-23 |

|          |              |             |             |
|----------|--------------|-------------|-------------|
| APC      | -0.505793163 | 7.62397E-25 | 1.73919E-23 |
| USE1     | 0.505748607  | 7.70796E-25 | 1.75634E-23 |
| ZNF75D   | -0.505639567 | 7.9174E-25  | 1.802E-23   |
| SSBP1    | 0.505603701  | 7.9875E-25  | 1.81588E-23 |
| POLR2L   | 0.505551401  | 8.09083E-25 | 1.83727E-23 |
| HSPG2    | -0.50544596  | 8.30318E-25 | 1.88335E-23 |
| MCRS1    | 0.505416593  | 8.36329E-25 | 1.89482E-23 |
| SGMS2    | -0.505402672 | 8.39194E-25 | 1.89915E-23 |
| PRPF19   | 0.505294922  | 8.61696E-25 | 1.94786E-23 |
| SMAD1    | -0.505260771 | 8.68952E-25 | 1.96204E-23 |
| FAM122A  | -0.505162989 | 8.90061E-25 | 2.00742E-23 |
| ZNF441   | -0.505102544 | 9.03362E-25 | 2.03512E-23 |
| ANO6     | -0.504759399 | 9.82673E-25 | 2.21129E-23 |
| ECE2     | 0.504678055  | 1.00246E-24 | 2.25327E-23 |
| KBTBD4   | -0.504584489 | 1.0257E-24  | 2.30292E-23 |
| PRMT10   | -0.504534092 | 1.03844E-24 | 2.3289E-23  |
| CYLD     | -0.504504125 | 1.04609E-24 | 2.34341E-23 |
| HIVEP2   | -0.50430687  | 1.09785E-24 | 2.45659E-23 |
| MRPS34   | 0.504050902  | 1.16879E-24 | 2.6124E-23  |
| RHBDD1   | -0.504045626 | 1.1703E-24  | 2.61284E-23 |
| WASH3P   | 0.503899343  | 1.21291E-24 | 2.70494E-23 |
| C14orf4  | -0.50385138  | 1.22721E-24 | 2.73377E-23 |
| NFATC2   | -0.503816642 | 1.23767E-24 | 2.754E-23   |
| PDCD2L   | 0.503773081  | 1.25092E-24 | 2.78036E-23 |
| RPUSD3   | 0.503601986  | 1.3043E-24  | 2.89577E-23 |
| UBR3     | -0.503484871 | 1.34213E-24 | 2.97644E-23 |
| NR2C2AP  | 0.503458261  | 1.35087E-24 | 2.9925E-23  |
| LRBA     | -0.503284698 | 1.4093E-24  | 3.11848E-23 |
| PARL     | 0.503238932  | 1.42512E-24 | 3.14998E-23 |
| SLC12A6  | -0.503215666 | 1.43323E-24 | 3.16439E-23 |
| PPP4R2   | -0.503085034 | 1.47961E-24 | 3.26318E-23 |
| PCDHGA5  | -0.503015946 | 1.50474E-24 | 3.31492E-23 |
| SUCNR1   | -0.502966673 | 1.52291E-24 | 3.35125E-23 |
| TIMM16   | 0.50295206   | 1.52835E-24 | 3.35949E-23 |
| HSPE1    | 0.502633889  | 1.65147E-24 | 3.62614E-23 |
| PPP1R7   | 0.502606026  | 1.66271E-24 | 3.64679E-23 |
| PAQR3    | -0.502458028 | 1.72367E-24 | 3.77634E-23 |
| NAA10    | 0.502391782  | 1.75167E-24 | 3.83347E-23 |
| GFER     | 0.502278171  | 1.80074E-24 | 3.93652E-23 |
| RAB2B    | -0.502270379 | 1.80415E-24 | 3.93966E-23 |
| RASGEF1B | -0.502183332 | 1.84273E-24 | 4.01949E-23 |
| MED14    | -0.502137001 | 1.86359E-24 | 4.06056E-23 |
| RBBP5    | -0.501998378 | 1.92742E-24 | 4.19504E-23 |
| C6orf136 | 0.501935344  | 1.95716E-24 | 4.2551E-23  |
| POLR2F   | 0.501905253  | 1.97151E-24 | 4.28164E-23 |
| CDK8     | -0.501762826 | 2.04086E-24 | 4.42743E-23 |

|          |              |             |             |
|----------|--------------|-------------|-------------|
| PTPRB    | -0.501746385 | 2.04902E-24 | 4.44029E-23 |
| C17orf49 | 0.501646739  | 2.09917E-24 | 4.54402E-23 |
| PDPR     | -0.501456767 | 2.19815E-24 | 4.75311E-23 |
| CDK17    | -0.501350716 | 2.25539E-24 | 4.87159E-23 |
| DNAJC27  | -0.501343706 | 2.25922E-24 | 4.87459E-23 |
| UBL7     | 0.501126417  | 2.38134E-24 | 5.13252E-23 |
| KIAA0355 | -0.500869196 | 2.53434E-24 | 5.45637E-23 |
| IPP      | -0.500673797 | 2.65701E-24 | 5.71429E-23 |
| HBXIP    | 0.500663419  | 2.66369E-24 | 5.72247E-23 |
| FTH1     | 0.500636932  | 2.6808E-24  | 5.75304E-23 |
| ADAM17   | -0.500484446 | 2.78146E-24 | 5.96263E-23 |
| PSMB6    | 0.500312029  | 2.89978E-24 | 6.20843E-23 |
| JMJD4    | 0.500308347  | 2.90236E-24 | 6.20843E-23 |
| C22orf32 | 0.500193155  | 2.98423E-24 | 6.37671E-23 |
| ATXN1L   | -0.500176449 | 2.99629E-24 | 6.39562E-23 |
| TNRC6A   | -0.500101266 | 3.05117E-24 | 6.50578E-23 |
| RAD54L2  | -0.499990922 | 3.13351E-24 | 6.67421E-23 |
| PRRG1    | -0.499960301 | 3.15675E-24 | 6.71652E-23 |
| CTU1     | 0.499814528  | 3.26971E-24 | 6.94945E-23 |
| STRA13   | 0.49979032   | 3.28886E-24 | 6.98268E-23 |
| MRPS5    | 0.499696145  | 3.36438E-24 | 7.13542E-23 |
| CENPC1   | -0.499637217 | 3.41251E-24 | 7.22979E-23 |
| FAM73A   | -0.499479544 | 3.54464E-24 | 7.50176E-23 |
| MYL6B    | 0.499435284  | 3.58263E-24 | 7.57411E-23 |
| CHMP2A   | 0.49934403   | 3.66223E-24 | 7.73418E-23 |
| SAMD8    | -0.499291354 | 3.70897E-24 | 7.82459E-23 |
| SLC25A40 | -0.49924624  | 3.74946E-24 | 7.90165E-23 |
| C20orf20 | 0.499136156  | 3.85012E-24 | 8.1052E-23  |
| MLL2     | -0.499105247 | 3.87886E-24 | 8.15707E-23 |
| OSBPL8   | -0.499080278 | 3.90223E-24 | 8.19756E-23 |
| CCPG1    | -0.498853854 | 4.12059E-24 | 8.64716E-23 |
| TMEM141  | 0.498660925  | 4.31613E-24 | 9.04797E-23 |
| C1orf182 | 0.49860727   | 4.37212E-24 | 9.1557E-23  |
| SRRD     | 0.498550663  | 4.43196E-24 | 9.27127E-23 |
| STAG1    | -0.498392591 | 4.60339E-24 | 9.61977E-23 |
| HSPB1    | 0.498246349  | 4.7678E-24  | 9.9529E-23  |
| EXOC5    | -0.498219426 | 4.79869E-24 | 1.00069E-22 |
| RPS25    | 0.498095279  | 4.94372E-24 | 1.02985E-22 |
| RRP8     | 0.498007801  | 5.0485E-24  | 1.05015E-22 |
| CISD3    | 0.49800515   | 5.05171E-24 | 1.05015E-22 |
| TNKS2    | -0.497974013 | 5.08955E-24 | 1.05692E-22 |
| SPSB2    | 0.49785319   | 5.23907E-24 | 1.08683E-22 |
| CDC14C   | -0.497776395 | 5.33634E-24 | 1.10586E-22 |
| CPEB2    | -0.497766848 | 5.34856E-24 | 1.10724E-22 |
| RPL34    | 0.497713091  | 5.41787E-24 | 1.12035E-22 |
| CNOT6L   | -0.497709017 | 5.42316E-24 | 1.12035E-22 |

|           |              |             |             |
|-----------|--------------|-------------|-------------|
| TMEM115   | 0.497520235  | 5.67388E-24 | 1.17094E-22 |
| ZNF776    | -0.497486915 | 5.71931E-24 | 1.17909E-22 |
| RASSF3    | -0.497373232 | 5.877E-24   | 1.21035E-22 |
| ANKIB1    | -0.497362379 | 5.89228E-24 | 1.21224E-22 |
| GPR116    | -0.496961866 | 6.48431E-24 | 1.33266E-22 |
| C16orf13  | 0.496829209  | 6.69304E-24 | 1.37414E-22 |
| MAGOH     | 0.496789435  | 6.75691E-24 | 1.38583E-22 |
| MRPL13    | 0.496604332  | 7.06213E-24 | 1.44694E-22 |
| CHD6      | -0.496596706 | 7.07499E-24 | 1.44808E-22 |
| COL27A1   | -0.496585996 | 7.09309E-24 | 1.4503E-22  |
| NAA38     | 0.496417582  | 7.38384E-24 | 1.5082E-22  |
| ANKRD50   | -0.496318766 | 7.55987E-24 | 1.54257E-22 |
| CASS4     | -0.496228786 | 7.72375E-24 | 1.5744E-22  |
| RPS6      | 0.496138584  | 7.89156E-24 | 1.60696E-22 |
| MAF1      | 0.49608777   | 7.98767E-24 | 1.62487E-22 |
| C19orf62  | 0.495766424  | 8.62276E-24 | 1.75227E-22 |
| JHDM1D    | -0.495715945 | 8.72695E-24 | 1.77163E-22 |
| KLHL24    | -0.495617602 | 8.93351E-24 | 1.81172E-22 |
| CNPY3     | 0.495414496  | 9.37549E-24 | 1.89942E-22 |
| DAXX      | 0.495373967  | 9.46624E-24 | 1.91585E-22 |
| TOP1      | -0.495264312 | 9.71612E-24 | 1.96443E-22 |
| SOCS4     | -0.495191305 | 9.88608E-24 | 1.99587E-22 |
| LCMT1     | 0.495188939  | 9.89164E-24 | 1.99587E-22 |
| SMARCA2   | -0.495062588 | 1.01929E-23 | 2.05457E-22 |
| PLSCR4    | -0.494934262 | 1.05081E-23 | 2.11597E-22 |
| ATE1      | -0.494838242 | 1.07503E-23 | 2.16255E-22 |
| PCDHGA6   | -0.494793919 | 1.08639E-23 | 2.1832E-22  |
| FBXL3     | -0.494658477 | 1.12185E-23 | 2.25219E-22 |
| ZNF444    | 0.494588616  | 1.14059E-23 | 2.28592E-22 |
| RANBP1    | 0.494587268  | 1.14095E-23 | 2.28592E-22 |
| C14orf118 | -0.494216617 | 1.24566E-23 | 2.4932E-22  |
| MTMR9     | -0.494198054 | 1.25114E-23 | 2.50166E-22 |
| INO80E    | 0.493992058  | 1.31365E-23 | 2.6226E-22  |
| SPTBN1    | -0.493990073 | 1.31427E-23 | 2.6226E-22  |
| NOC4L     | 0.493938946  | 1.33026E-23 | 2.65186E-22 |
| PPAN      | 0.493883311  | 1.34788E-23 | 2.68429E-22 |
| LYST      | -0.493857144 | 1.35624E-23 | 2.69826E-22 |
| HINT1     | 0.493768389  | 1.385E-23   | 2.75273E-22 |
| LOC152217 | 0.493678993  | 1.41458E-23 | 2.80704E-22 |
| FUBP3     | -0.493677293 | 1.41515E-23 | 2.80704E-22 |
| NMB       | 0.493608845  | 1.43822E-23 | 2.84997E-22 |
| DOM3Z     | 0.493589636  | 1.44476E-23 | 2.86009E-22 |
| C1orf31   | 0.493461024  | 1.48933E-23 | 2.94538E-22 |
| DYRK1A    | -0.493287917 | 1.55146E-23 | 3.0652E-22  |
| PIK3R4    | -0.493019969 | 1.6527E-23  | 3.26199E-22 |
| SMEK2     | -0.492823753 | 1.73094E-23 | 3.41303E-22 |

|           |              |             |             |
|-----------|--------------|-------------|-------------|
| CDC42BPB  | -0.492643457 | 1.80605E-23 | 3.55761E-22 |
| WASH7P    | 0.492613356  | 1.8189E-23  | 3.57721E-22 |
| NSFL1C    | 0.492611738  | 1.81959E-23 | 3.57721E-22 |
| CHD2      | -0.492549149 | 1.8466E-23  | 3.62674E-22 |
| PRR13     | 0.492477267  | 1.87812E-23 | 3.685E-22   |
| PPP4C     | 0.492470722  | 1.88102E-23 | 3.68705E-22 |
| CENPM     | 0.492319839  | 1.94901E-23 | 3.81656E-22 |
| NDUFB4    | 0.492202485  | 2.00356E-23 | 3.91953E-22 |
| ZNF25     | -0.492186644 | 2.01104E-23 | 3.9303E-22  |
| NUMB      | -0.492073724 | 2.06514E-23 | 4.03209E-22 |
| LCOR      | -0.49201884  | 2.09196E-23 | 4.08045E-22 |
| RANBP6    | -0.491888836 | 2.15686E-23 | 4.20291E-22 |
| ESYT2     | -0.491809077 | 2.19765E-23 | 4.27821E-22 |
| HERC2     | -0.491722528 | 2.24277E-23 | 4.3618E-22  |
| SFMBT2    | -0.491516687 | 2.3538E-23  | 4.57326E-22 |
| ADRM1     | 0.491416017  | 2.41005E-23 | 4.67644E-22 |
| PLEKHM3   | -0.491413281 | 2.4116E-23  | 4.67644E-22 |
| SNED1     | -0.491252708 | 2.50414E-23 | 4.85117E-22 |
| FYCO1     | -0.491129962 | 2.57724E-23 | 4.98792E-22 |
| RASSF8    | -0.490989432 | 2.66351E-23 | 5.14989E-22 |
| FAM86A    | 0.49097157   | 2.67468E-23 | 5.16646E-22 |
| YTHDC2    | -0.490922552 | 2.70556E-23 | 5.22106E-22 |
| SAV1      | -0.490882981 | 2.73075E-23 | 5.26456E-22 |
| NEK1      | -0.490799804 | 2.78445E-23 | 5.3629E-22  |
| C7orf30   | 0.490674961  | 2.86701E-23 | 5.51658E-22 |
| EGFR      | -0.490352783 | 3.0914E-23  | 5.94258E-22 |
| PDPK1     | -0.490308529 | 3.12354E-23 | 5.99858E-22 |
| HIVEP1    | -0.490222582 | 3.18691E-23 | 6.11438E-22 |
| RPL12     | 0.49017185   | 3.22491E-23 | 6.18133E-22 |
| RRN3      | -0.490164411 | 3.23052E-23 | 6.18613E-22 |
| RPL17     | 0.490133653  | 3.25381E-23 | 6.22475E-22 |
| PSMB1     | 0.490086832  | 3.28959E-23 | 6.28716E-22 |
| PHF1      | 0.489899491  | 3.43667E-23 | 6.56197E-22 |
| TNPO3     | -0.489843654 | 3.48175E-23 | 6.64168E-22 |
| DIABLO    | 0.489755388  | 3.5542E-23  | 6.77339E-22 |
| USP34     | -0.489639517 | 3.65157E-23 | 6.95231E-22 |
| PFDN2     | 0.489393005  | 3.86756E-23 | 7.35649E-22 |
| ATAD2B    | -0.489307306 | 3.94556E-23 | 7.4977E-22  |
| CCDC61    | 0.489211814  | 4.0343E-23  | 7.65902E-22 |
| FDX1L     | 0.489098162  | 4.14249E-23 | 7.85691E-22 |
| DDX3X     | -0.488946745 | 4.29107E-23 | 8.13099E-22 |
| ARPC3     | 0.488939717  | 4.29809E-23 | 8.13655E-22 |
| ACAP2     | -0.488868562 | 4.36984E-23 | 8.26451E-22 |
| RAB24     | 0.48863306   | 4.61581E-23 | 8.72143E-22 |
| LOC100144 | 0.488576297  | 4.67711E-23 | 8.82887E-22 |
| MOB2      | 0.488427961  | 4.84111E-23 | 9.1298E-22  |

|          |              |             |             |
|----------|--------------|-------------|-------------|
| HDHC3    | 0.488319913  | 4.96413E-23 | 9.34733E-22 |
| B3GNT2   | -0.488318427 | 4.96584E-23 | 9.34733E-22 |
| ERI3     | 0.4882295    | 5.06943E-23 | 9.53331E-22 |
| SPTLC2   | -0.488155002 | 5.15785E-23 | 9.69043E-22 |
| XPO5     | 0.488147041  | 5.16739E-23 | 9.6992E-22  |
| YY2      | -0.488092962 | 5.23264E-23 | 9.81244E-22 |
| FAM161B  | -0.48793656  | 5.42597E-23 | 1.01654E-21 |
| ARHGAP42 | -0.487922572 | 5.4436E-23  | 1.01888E-21 |
| AKAP9    | -0.487837785 | 5.55168E-23 | 1.03814E-21 |
| NDUFS5   | 0.487770489  | 5.63896E-23 | 1.05347E-21 |
| JMJD6    | 0.487740556  | 5.67822E-23 | 1.05981E-21 |
| FBXO3    | -0.487714849 | 5.71215E-23 | 1.06514E-21 |
| PEX26    | -0.487517695 | 5.97909E-23 | 1.11388E-21 |
| KDR      | -0.487502025 | 6.00083E-23 | 1.11688E-21 |
| ZNF699   | -0.487482106 | 6.02857E-23 | 1.121E-21   |
| ANKFY1   | -0.48738801  | 6.16135E-23 | 1.14462E-21 |
| CHCHD5   | 0.487370094  | 6.18696E-23 | 1.14785E-21 |
| SCAND1   | 0.487367784  | 6.19027E-23 | 1.14785E-21 |
| HSPB11   | 0.487233239  | 6.38605E-23 | 1.18305E-21 |
| BBS1     | -0.487135069 | 6.53273E-23 | 1.2091E-21  |
| ZNF593   | 0.487130922  | 6.539E-23   | 1.20914E-21 |
| KRIT1    | -0.487105923 | 6.57692E-23 | 1.2146E-21  |
| ZMYND19  | 0.487103432  | 6.58071E-23 | 1.2146E-21  |
| RASA1    | -0.487067399 | 6.63578E-23 | 1.22363E-21 |
| COMMD5   | 0.486955943  | 6.809E-23   | 1.25402E-21 |
| TTC1     | 0.486953271  | 6.81321E-23 | 1.25402E-21 |
| NOL12    | 0.486917877  | 6.86918E-23 | 1.26315E-21 |
| AURKB    | 0.486710654  | 7.20607E-23 | 1.32388E-21 |
| CLDN16   | -0.486601825 | 7.38948E-23 | 1.35633E-21 |
| UVRAG    | -0.486596524 | 7.39853E-23 | 1.35674E-21 |
| ARID4A   | -0.486192373 | 8.12165E-23 | 1.48797E-21 |
| FAM96B   | 0.486018287  | 8.4542E-23  | 1.54748E-21 |
| SAMD4B   | -0.485914248 | 8.65932E-23 | 1.58357E-21 |
| RPL26L1  | 0.485829844  | 8.82932E-23 | 1.61317E-21 |
| ANKRD12  | -0.485605593 | 9.29713E-23 | 1.69709E-21 |
| KIF22    | 0.48554798   | 9.42121E-23 | 1.71816E-21 |
| CHMP6    | 0.48535689   | 9.84456E-23 | 1.79373E-21 |
| SLC26A6  | 0.485198159  | 1.02104E-22 | 1.85869E-21 |
| ITGA1    | -0.485143857 | 1.03387E-22 | 1.88031E-21 |
| STT3B    | -0.484976847 | 1.0743E-22  | 1.95207E-21 |
| P2RY1    | -0.484911821 | 1.09047E-22 | 1.97964E-21 |
| AKT3     | -0.484888882 | 1.09622E-22 | 1.98828E-21 |
| MAP2K1   | -0.484823481 | 1.11281E-22 | 2.01652E-21 |
| APOOL    | -0.48481906  | 1.11394E-22 | 2.01673E-21 |
| CRYBG3   | -0.484787932 | 1.12192E-22 | 2.02935E-21 |
| PJA2     | -0.484780875 | 1.12374E-22 | 2.03079E-21 |



|           |              |             |             |
|-----------|--------------|-------------|-------------|
| TMED4     | -0.484639692 | 1.16074E-22 | 2.09576E-21 |
| SLC10A6   | -0.484627135 | 1.16409E-22 | 2.0999E-21  |
| VPS13D    | -0.484283893 | 1.2594E-22  | 2.26978E-21 |
| C12orf45  | 0.48415929   | 1.29587E-22 | 2.33339E-21 |
| CCDC82    | -0.484072697 | 1.32183E-22 | 2.37798E-21 |
| COX17     | 0.484067276  | 1.32347E-22 | 2.37878E-21 |
| C6orf204  | -0.48405289  | 1.32784E-22 | 2.38448E-21 |
| MRPS26    | 0.48403318   | 1.33384E-22 | 2.39311E-21 |
| USP25     | -0.484006924 | 1.34189E-22 | 2.40374E-21 |
| TOMM22    | 0.484005963  | 1.34218E-22 | 2.40374E-21 |
| PPFIA1    | -0.483931792 | 1.36516E-22 | 2.4427E-21  |
| SSR2      | 0.483874949  | 1.38304E-22 | 2.47246E-21 |
| SEC13     | 0.483845324  | 1.39245E-22 | 2.48705E-21 |
| PPM1L     | -0.48357991  | 1.47959E-22 | 2.64033E-21 |
| NCOA1     | -0.483455885 | 1.52214E-22 | 2.71382E-21 |
| SLC25A39  | 0.483405561  | 1.53974E-22 | 2.74275E-21 |
| RORA      | -0.483347015 | 1.56047E-22 | 2.77552E-21 |
| C1orf58   | -0.483345743 | 1.56093E-22 | 2.77552E-21 |
| PRDX1     | 0.483325718  | 1.56808E-22 | 2.78576E-21 |
| TALDO1    | 0.483315551  | 1.57173E-22 | 2.78975E-21 |
| ITPR1     | -0.48323485  | 1.60097E-22 | 2.83911E-21 |
| PHLPP2    | -0.483228738 | 1.6032E-22  | 2.84055E-21 |
| RAB3GAP1  | -0.483064449 | 1.66447E-22 | 2.94649E-21 |
| ZNF397    | -0.4829765   | 1.69822E-22 | 3.00355E-21 |
| C13orf31  | -0.482918864 | 1.72069E-22 | 3.0406E-21  |
| LAGE3     | 0.48271591   | 1.8022E-22  | 3.18181E-21 |
| MRPL20    | 0.482701786  | 1.80802E-22 | 3.18925E-21 |
| GPR125    | -0.482592242 | 1.85372E-22 | 3.26698E-21 |
| TIAF1     | 0.48255811   | 1.8682E-22  | 3.28958E-21 |
| ZNF787    | 0.48254443   | 1.87403E-22 | 3.29693E-21 |
| GPR157    | -0.482520401 | 1.88432E-22 | 3.31211E-21 |
| MPDZ      | -0.482500214 | 1.893E-22   | 3.32444E-21 |
| GMCL1     | -0.482468725 | 1.90663E-22 | 3.34542E-21 |
| DENND4C   | -0.482340854 | 1.96297E-22 | 3.44124E-21 |
| RSBN1L    | -0.482144756 | 2.05257E-22 | 3.59423E-21 |
| PSMA5     | 0.482142023  | 2.05385E-22 | 3.59423E-21 |
| TXN       | 0.482019365  | 2.11196E-22 | 3.69269E-21 |
| SCARB2    | -0.481891238 | 2.1744E-22  | 3.79853E-21 |
| NCRNA0012 | -0.4818733   | 2.18329E-22 | 3.8096E-21  |
| FKBP1A    | 0.48187073   | 2.18456E-22 | 3.8096E-21  |
| THAP3     | 0.481796657  | 2.22166E-22 | 3.87089E-21 |
| UQCR10    | 0.481707878  | 2.26693E-22 | 3.94633E-21 |
| BRI3      | 0.481538865  | 2.35566E-22 | 4.0972E-21  |
| MFSD5     | 0.481388115  | 2.43768E-22 | 4.23615E-21 |
| COMMD7    | 0.48127816   | 2.49927E-22 | 4.3394E-21  |
| BHLHE40   | -0.481259332 | 2.50997E-22 | 4.35418E-21 |

|           |              |             |             |
|-----------|--------------|-------------|-------------|
| EIF3D     | 0.481144174  | 2.5764E-22  | 4.46553E-21 |
| ARHGAP32  | -0.481135777 | 2.58131E-22 | 4.46854E-21 |
| PKN2      | -0.481133531 | 2.58262E-22 | 4.46854E-21 |
| NDUFA13   | 0.481051405  | 2.63117E-22 | 4.54859E-21 |
| RNASEH2A  | 0.480933228  | 2.70261E-22 | 4.66803E-21 |
| KIF27     | -0.480838994 | 2.76094E-22 | 4.76465E-21 |
| PHC3      | -0.48079619  | 2.78784E-22 | 4.80691E-21 |
| HIGD2A    | 0.480723045  | 2.83441E-22 | 4.88299E-21 |
| SERINC1   | -0.480696144 | 2.85174E-22 | 4.90858E-21 |
| PNPLA8    | -0.480574238 | 2.93154E-22 | 5.0416E-21  |
| SHROOM4   | -0.480529034 | 2.96169E-22 | 5.08905E-21 |
| COMMD1    | 0.480360439  | 3.07686E-22 | 5.28239E-21 |
| EME1      | 0.480355126  | 3.08056E-22 | 5.28418E-21 |
| SEC24D    | -0.48012348  | 3.24622E-22 | 5.56355E-21 |
| PKD2      | -0.480099804 | 3.26364E-22 | 5.5886E-21  |
| PGLS      | 0.47990861   | 3.40772E-22 | 5.8303E-21  |
| SERPINB6  | 0.479724583  | 3.55231E-22 | 6.07247E-21 |
| PCDHGB3   | -0.479719817 | 3.55613E-22 | 6.07379E-21 |
| STK38L    | -0.479687506 | 3.58216E-22 | 6.11301E-21 |
| UBE2Q2P1  | -0.47938289  | 3.83699E-22 | 6.54226E-21 |
| R3HDM2    | -0.479276875 | 3.9298E-22  | 6.69478E-21 |
| C22orf40  | 0.479196245  | 4.00187E-22 | 6.81173E-21 |
| LYPLA2    | 0.479098183  | 4.09127E-22 | 6.95796E-21 |
| C7orf50   | 0.479040811  | 4.14449E-22 | 7.04245E-21 |
| SNX12     | -0.478958095 | 4.22241E-22 | 7.16874E-21 |
| SKI       | -0.47891572  | 4.26289E-22 | 7.2313E-21  |
| LRCH3     | -0.478695145 | 4.47985E-22 | 7.59288E-21 |
| DAAM1     | -0.478562066 | 4.61598E-22 | 7.81694E-21 |
| RBM10     | 0.478437168  | 4.74744E-22 | 8.03273E-21 |
| NPAT      | -0.478297283 | 4.89906E-22 | 8.28223E-21 |
| ARHGEF6   | -0.47829044  | 4.90659E-22 | 8.28794E-21 |
| SACM1L    | -0.478222705 | 4.98183E-22 | 8.40383E-21 |
| SLC2A10   | -0.478221082 | 4.98364E-22 | 8.40383E-21 |
| CCDC124   | 0.478082554  | 5.14112E-22 | 8.66205E-21 |
| NDUFA12   | 0.478067926  | 5.15804E-22 | 8.6832E-21  |
| ERG       | -0.478040428 | 5.18998E-22 | 8.72959E-21 |
| TOPORS    | -0.477962365 | 5.28172E-22 | 8.87641E-21 |
| LOC388796 | 0.477857141  | 5.40792E-22 | 9.08083E-21 |
| SPEN      | -0.477830455 | 5.44039E-22 | 9.12767E-21 |
| RPP40     | 0.47775842   | 5.52901E-22 | 9.26855E-21 |
| FICD      | -0.477751284 | 5.53787E-22 | 9.27558E-21 |
| KCTD18    | -0.477676915 | 5.631E-22   | 9.42365E-21 |
| TRIM44    | -0.477462078 | 5.9088E-22  | 9.87298E-21 |
| RAPGEF5   | -0.477461615 | 5.90941E-22 | 9.87298E-21 |
| VARS      | 0.477410391  | 5.97763E-22 | 9.97858E-21 |
| MOBKL1B   | -0.477262175 | 6.17939E-22 | 1.03068E-20 |

|           |              |             |             |
|-----------|--------------|-------------|-------------|
| DNLZ      | 0.477218102  | 6.24068E-22 | 1.04003E-20 |
| LOC100272 | -0.477201432 | 6.26401E-22 | 1.04304E-20 |
| UNC5C     | -0.47714636  | 6.34171E-22 | 1.0551E-20  |
| C10orf4   | 0.4770767    | 6.44136E-22 | 1.07078E-20 |
| COMMD3    | 0.477018523  | 6.52576E-22 | 1.08391E-20 |
| WDR47     | -0.477012741 | 6.53421E-22 | 1.08441E-20 |
| KAT2B     | -0.476949008 | 6.62804E-22 | 1.09906E-20 |
| TRAPPC10  | -0.476772507 | 6.89489E-22 | 1.14236E-20 |
| SRPRB     | 0.476639202  | 7.10341E-22 | 1.17593E-20 |
| MYH9      | -0.476615996 | 7.14034E-22 | 1.18106E-20 |
| S1PR1     | -0.476605449 | 7.15719E-22 | 1.18287E-20 |
| LARP1B    | -0.476506437 | 7.31727E-22 | 1.20832E-20 |
| GNAQ      | -0.476436264 | 7.43285E-22 | 1.22639E-20 |
| NDUFA3    | 0.476359609  | 7.56117E-22 | 1.24653E-20 |
| MRPS12    | 0.476268119  | 7.71718E-22 | 1.2712E-20  |
| NOP16     | 0.476237346  | 7.77036E-22 | 1.2789E-20  |
| PPIB      | 0.476001981  | 8.18926E-22 | 1.34571E-20 |
| EPB41L5   | -0.476001685 | 8.1898E-22  | 1.34571E-20 |
| NME3      | 0.475887     | 8.40191E-22 | 1.37942E-20 |
| TRAF6     | -0.475859814 | 8.45298E-22 | 1.38666E-20 |
| COX6A1    | 0.47582569   | 8.51751E-22 | 1.3961E-20  |
| AQR       | -0.475640744 | 8.87582E-22 | 1.45363E-20 |
| RPS3A     | 0.475601439  | 8.95386E-22 | 1.46521E-20 |
| USP9X     | -0.475504217 | 9.14981E-22 | 1.49605E-20 |
| UFC1      | 0.475425216  | 9.31214E-22 | 1.52134E-20 |
| PPP1R12A  | -0.475176448 | 9.84207E-22 | 1.6066E-20  |
| LOC100190 | -0.475120035 | 9.96631E-22 | 1.62555E-20 |
| PCF11     | -0.475074626 | 1.00674E-21 | 1.6407E-20  |
| ADAMTS12  | -0.474953688 | 1.03417E-21 | 1.68402E-20 |
| NCK1      | -0.474937385 | 1.03793E-21 | 1.68875E-20 |
| SURF6     | 0.474908116  | 1.0447E-21  | 1.69838E-20 |
| ENSA      | 0.474660073  | 1.10387E-21 | 1.79311E-20 |
| AUP1      | 0.474622976  | 1.113E-21   | 1.80647E-20 |
| TECPR1    | -0.474599259 | 1.11887E-21 | 1.81453E-20 |
| PDZD2     | -0.474561409 | 1.12831E-21 | 1.82835E-20 |
| C11orf59  | 0.474521008  | 1.13848E-21 | 1.84331E-20 |
| CPEB3     | -0.47451573  | 1.13981E-21 | 1.84397E-20 |
| TMEM147   | 0.474302521  | 1.19502E-21 | 1.93172E-20 |
| C2orf28   | 0.4741611    | 1.23308E-21 | 1.99162E-20 |
| PSMC4     | 0.474057804  | 1.26163E-21 | 2.03609E-20 |
| TRAIP     | 0.474002277  | 1.27725E-21 | 2.05963E-20 |
| LCA5      | -0.473882159 | 1.31169E-21 | 2.11345E-20 |
| SKIV2L    | 0.473833886  | 1.32578E-21 | 2.13443E-20 |
| CDCA3     | 0.473448261  | 1.44388E-21 | 2.32268E-20 |
| FAM190B   | -0.473443777 | 1.44531E-21 | 2.32311E-20 |
| APIG1     | -0.473436881 | 1.44752E-21 | 2.32478E-20 |

|          |              |             |             |
|----------|--------------|-------------|-------------|
| CACYBP   | 0.473430791  | 1.44947E-21 | 2.32604E-20 |
| GHR      | -0.473387902 | 1.46328E-21 | 2.34631E-20 |
| EEF1E1   | 0.473262216  | 1.5045E-21  | 2.41047E-20 |
| POLR2K   | 0.473150768  | 1.54201E-21 | 2.46858E-20 |
| NDUFA7   | 0.47311085   | 1.55567E-21 | 2.48844E-20 |
| HSP90AB1 | 0.472746329  | 1.68603E-21 | 2.6948E-20  |
| TNS3     | -0.472662283 | 1.71758E-21 | 2.74303E-20 |
| HMG2     | 0.472617148  | 1.73476E-21 | 2.76825E-20 |
| ERCC4    | -0.472525153 | 1.77031E-21 | 2.82272E-20 |
| CBL      | -0.472476866 | 1.78926E-21 | 2.85065E-20 |
| PCDHGA11 | -0.472425202 | 1.80975E-21 | 2.88099E-20 |
| CHM      | -0.472246628 | 1.88237E-21 | 2.99421E-20 |
| PTPRM    | -0.47214154  | 1.92645E-21 | 3.06186E-20 |
| SPIN1    | -0.472088283 | 1.94917E-21 | 3.09551E-20 |
| RECQL4   | 0.472039392  | 1.97026E-21 | 3.12651E-20 |
| SLC35F5  | -0.471986208 | 1.99346E-21 | 3.1608E-20  |
| TBCC     | 0.471974581  | 1.99856E-21 | 3.16511E-20 |
| MICAL3   | -0.471972786 | 1.99935E-21 | 3.16511E-20 |
| UTP14C   | -0.471968791 | 2.00111E-21 | 3.16538E-20 |
| MOSPD2   | -0.471846711 | 2.05559E-21 | 3.24898E-20 |
| PTPMT1   | 0.47182561   | 2.06516E-21 | 3.2615E-20  |
| XIAP     | -0.471814187 | 2.07035E-21 | 3.26476E-20 |
| CYSLTR2  | -0.471813871 | 2.07049E-21 | 3.26476E-20 |
| ZFPM2    | -0.471677412 | 2.13357E-21 | 3.36155E-20 |
| LSMD1    | 0.471435027  | 2.2503E-21  | 3.54267E-20 |
| SUV39H1  | 0.471429465  | 2.25305E-21 | 3.5442E-20  |
| GJD3     | -0.471227445 | 2.35526E-21 | 3.70205E-20 |
| NUDT16L1 | 0.471155174  | 2.39292E-21 | 3.75828E-20 |
| FARSB    | 0.470988408  | 2.4821E-21  | 3.89527E-20 |
| COMMD6   | 0.470974275  | 2.48981E-21 | 3.90429E-20 |
| NF1      | -0.470960066 | 2.49758E-21 | 3.9134E-20  |
| MRPS11   | 0.470710229  | 2.6382E-21  | 4.13049E-20 |
| L2HGDH   | -0.470585492 | 2.7113E-21  | 4.2416E-20  |
| IL1R1    | -0.470504898 | 2.75959E-21 | 4.31375E-20 |
| ANKRD39  | 0.470430878  | 2.80469E-21 | 4.38081E-20 |
| C6orf1   | 0.470371699  | 2.84126E-21 | 4.43446E-20 |
| PCYOX1   | -0.470168903 | 2.9702E-21  | 4.63206E-20 |
| TGOLN2   | -0.470156971 | 2.97796E-21 | 4.64054E-20 |
| STOML2   | 0.470133484  | 2.9933E-21  | 4.66079E-20 |
| SFXN4    | 0.470117165  | 3.004E-21   | 4.6738E-20  |
| KIF26A   | -0.470093863 | 3.01935E-21 | 4.69402E-20 |
| CWC15    | 0.470053855  | 3.04589E-21 | 4.73158E-20 |
| SERINC5  | -0.470041204 | 3.05432E-21 | 4.74099E-20 |
| ARL5B    | -0.469952843 | 3.11391E-21 | 4.82971E-20 |
| HTRA2    | 0.469880778  | 3.16335E-21 | 4.90257E-20 |
| PAPOLG   | -0.469862776 | 3.17582E-21 | 4.91807E-20 |

|           |              |             |             |
|-----------|--------------|-------------|-------------|
| LOC100130 | 0.469838725  | 3.19255E-21 | 4.94015E-20 |
| CPSF3     | 0.469817162  | 3.20763E-21 | 4.95963E-20 |
| NDUFS8    | 0.469718997  | 3.27717E-21 | 5.06322E-20 |
| COG6      | -0.469714766 | 3.2802E-21  | 5.06397E-20 |
| PSMC3IP   | 0.469673449  | 3.30994E-21 | 5.10592E-20 |
| GLO1      | 0.469634832  | 3.33797E-21 | 5.14518E-20 |
| PTGES2    | 0.469550509  | 3.4E-21     | 5.23674E-20 |
| EHBP1     | -0.469536941 | 3.41009E-21 | 5.24821E-20 |
| FAM115A   | -0.469293477 | 3.59617E-21 | 5.53032E-20 |
| THBD      | -0.469287621 | 3.60076E-21 | 5.53312E-20 |
| HS3ST3B1  | -0.469203496 | 3.66744E-21 | 5.63123E-20 |
| CDT1      | 0.469070474  | 3.77536E-21 | 5.79248E-20 |
| ATF7IP    | -0.468906841 | 3.91242E-21 | 5.99814E-20 |
| PDP2      | -0.468815911 | 3.99069E-21 | 6.11342E-20 |
| QKI       | -0.468801252 | 4.00345E-21 | 6.12826E-20 |
| CCDC59    | 0.468688102  | 4.10331E-21 | 6.2763E-20  |
| ZNF580    | 0.46860518   | 4.17805E-21 | 6.38571E-20 |
| ABHD2     | -0.468521035 | 4.25526E-21 | 6.49873E-20 |
| UQCRH     | 0.468404113  | 4.36488E-21 | 6.66105E-20 |
| PREPL     | -0.468343762 | 4.42255E-21 | 6.74388E-20 |
| PPP5K2    | -0.46827496  | 4.48921E-21 | 6.84029E-20 |
| CTAGE1    | -0.467820757 | 4.95478E-21 | 7.54392E-20 |
| WRAP53    | 0.467788718  | 4.98936E-21 | 7.59076E-20 |
| SEC61B    | 0.467777342  | 5.0017E-21  | 7.60372E-20 |
| TRIM28    | 0.467707005  | 5.07863E-21 | 7.7148E-20  |
| OPA1      | -0.46766914  | 5.12053E-21 | 7.77252E-20 |
| HDGFRP2   | 0.467257053  | 5.59914E-21 | 8.48887E-20 |
| DICER1    | -0.467255526 | 5.60099E-21 | 8.48887E-20 |
| EIF3H     | 0.46724181   | 5.61766E-21 | 8.50766E-20 |
| SIPA1L1   | -0.467158216 | 5.72033E-21 | 8.65656E-20 |
| C17orf61  | 0.467076406  | 5.82259E-21 | 8.80462E-20 |
| TRAPPC2L  | 0.466999942  | 5.9198E-21  | 8.94482E-20 |
| PCDHGA9   | -0.466939791 | 5.99739E-21 | 9.05519E-20 |
| IDE       | -0.466912139 | 6.03339E-21 | 9.10265E-20 |
| KPTN      | 0.466817243  | 6.15857E-21 | 9.28448E-20 |
| WDR83     | 0.466747417  | 6.25232E-21 | 9.41868E-20 |
| SUMO2     | 0.4666758    | 6.34992E-21 | 9.55241E-20 |
| WDTC1     | -0.466675244 | 6.35069E-21 | 9.55241E-20 |
| MYST3     | -0.466669215 | 6.35897E-21 | 9.55766E-20 |
| NARF      | 0.466650344  | 6.38498E-21 | 9.5895E-20  |
| PPP2R1A   | 0.466588154  | 6.47142E-21 | 9.71201E-20 |
| FTL       | 0.466544508  | 6.53277E-21 | 9.7967E-20  |
| ATP2A2    | -0.466474054 | 6.63302E-21 | 9.93955E-20 |
| LOC541471 | 0.466421175  | 6.70926E-21 | 1.00462E-19 |
| FBXO11    | -0.466349915 | 6.81336E-21 | 1.01944E-19 |
| VCL       | -0.466346469 | 6.81843E-21 | 1.01944E-19 |

|           |              |             |             |
|-----------|--------------|-------------|-------------|
| YLPM1     | -0.4662484   | 6.96441E-21 | 1.04048E-19 |
| ATP11B    | -0.46616321  | 7.09371E-21 | 1.05901E-19 |
| COL4A3BP  | -0.466158983 | 7.10019E-21 | 1.05918E-19 |
| HECW2     | -0.466041863 | 7.28199E-21 | 1.08548E-19 |
| RGS7BP    | -0.466012001 | 7.32907E-21 | 1.09169E-19 |
| EIF2AK4   | -0.465970617 | 7.39481E-21 | 1.10066E-19 |
| INO80     | -0.465902456 | 7.50436E-21 | 1.11587E-19 |
| IK        | 0.465900058  | 7.50824E-21 | 1.11587E-19 |
| TRMU      | 0.465814165  | 7.64864E-21 | 1.13589E-19 |
| DDX21     | -0.465790464 | 7.68784E-21 | 1.14086E-19 |
| GAR1      | 0.465717003  | 7.81058E-21 | 1.15821E-19 |
| SENPF7    | -0.465707957 | 7.82583E-21 | 1.15961E-19 |
| MRPL36    | 0.465686358  | 7.86235E-21 | 1.16415E-19 |
| UEVLD     | -0.465546725 | 8.10256E-21 | 1.19883E-19 |
| PXK       | -0.465509489 | 8.16782E-21 | 1.20759E-19 |
| ZEB1      | -0.465471323 | 8.23526E-21 | 1.21666E-19 |
| CALCRL    | -0.46539505  | 8.37167E-21 | 1.23589E-19 |
| HIAT1     | -0.465238157 | 8.6593E-21  | 1.27741E-19 |
| KLHL23    | -0.465066539 | 8.98508E-21 | 1.32448E-19 |
| INTS4L2   | -0.464682197 | 9.75908E-21 | 1.43751E-19 |
| WDR31     | -0.464671916 | 9.78066E-21 | 1.43963E-19 |
| PEX1      | -0.464623942 | 9.88199E-21 | 1.45347E-19 |
| WDR44     | -0.464581717 | 9.97202E-21 | 1.46505E-19 |
| DDX39     | 0.464580116  | 9.97545E-21 | 1.46505E-19 |
| 44084     | -0.46431341  | 1.05633E-20 | 1.55025E-19 |
| ZNF408    | 0.464300967  | 1.05916E-20 | 1.5524E-19  |
| LNPEP     | -0.464300071 | 1.05936E-20 | 1.5524E-19  |
| CLN3      | 0.46428878   | 1.06193E-20 | 1.55503E-19 |
| TRNAU1AP  | 0.464243135  | 1.07238E-20 | 1.56918E-19 |
| ZMIZ1     | -0.464191893 | 1.08424E-20 | 1.58536E-19 |
| LDB2      | -0.464169961 | 1.08935E-20 | 1.59166E-19 |
| KLF7      | -0.46405155  | 1.11737E-20 | 1.6314E-19  |
| GPS2      | 0.464015926  | 1.12593E-20 | 1.64271E-19 |
| PSMB5     | 0.463876249  | 1.16015E-20 | 1.69139E-19 |
| CHCHD7    | 0.463827035  | 1.17245E-20 | 1.70807E-19 |
| SGK196    | -0.463812476 | 1.17611E-20 | 1.71216E-19 |
| ETV2      | 0.463730583  | 1.19693E-20 | 1.74119E-19 |
| DCAF5     | -0.463687274 | 1.20808E-20 | 1.75613E-19 |
| PPP1R3B   | -0.463401224 | 1.28437E-20 | 1.86566E-19 |
| TRIM78P   | -0.463364132 | 1.2946E-20  | 1.87915E-19 |
| DHRS13    | 0.46330254   | 1.31177E-20 | 1.90269E-19 |
| LOC100271 | -0.463235115 | 1.33082E-20 | 1.92892E-19 |
| RPSAP9    | 0.463203801  | 1.33976E-20 | 1.94047E-19 |
| IRF2      | -0.4631722   | 1.34885E-20 | 1.9522E-19  |
| DAAM2     | -0.462952334 | 1.41374E-20 | 2.04464E-19 |
| ACBD5     | -0.462878682 | 1.43616E-20 | 2.07556E-19 |

|           |              |             |             |
|-----------|--------------|-------------|-------------|
| CLINT1    | -0.462788024 | 1.46424E-20 | 2.1146E-19  |
| TSEN54    | 0.462736142  | 1.48055E-20 | 2.1366E-19  |
| QPCTL     | 0.462706218  | 1.49004E-20 | 2.14874E-19 |
| LOC220429 | -0.462527512 | 1.54796E-20 | 2.23065E-19 |
| LOC200030 | -0.46251013  | 1.55371E-20 | 2.23732E-19 |
| EPC2      | -0.462456728 | 1.57151E-20 | 2.26132E-19 |
| DCAF17    | -0.462400553 | 1.59045E-20 | 2.28692E-19 |
| TCOF1     | 0.462390569  | 1.59384E-20 | 2.29014E-19 |
| POLR2A    | -0.462363982 | 1.6029E-20  | 2.3015E-19  |
| P2RX7     | -0.462353404 | 1.60652E-20 | 2.30504E-19 |
| CACNA2D1  | -0.462300386 | 1.62479E-20 | 2.32956E-19 |
| ZYG11B    | -0.462280021 | 1.63186E-20 | 2.33801E-19 |
| CUEDC2    | 0.462249736  | 1.64242E-20 | 2.35147E-19 |
| C11orf74  | 0.462243092  | 1.64475E-20 | 2.35311E-19 |
| SNAPC3    | -0.462223554 | 1.65162E-20 | 2.36123E-19 |
| ZNF81     | -0.462124928 | 1.6867E-20  | 2.40965E-19 |
| SOX7      | -0.462120783 | 1.68819E-20 | 2.41005E-19 |
| RAPGEF4   | -0.46207085  | 1.70624E-20 | 2.43408E-19 |
| USP47     | -0.462029497 | 1.72134E-20 | 2.45386E-19 |
| GPATCH8   | -0.46191261  | 1.76472E-20 | 2.51391E-19 |
| FILIP1L   | -0.461885418 | 1.77497E-20 | 2.5267E-19  |
| TOMM5     | 0.46176975   | 1.81921E-20 | 2.58783E-19 |
| MGRN1     | -0.461766189 | 1.82059E-20 | 2.58794E-19 |
| LOC90834  | -0.461726502 | 1.83603E-20 | 2.60803E-19 |
| NDUFS3    | 0.461664581  | 1.86038E-20 | 2.64073E-19 |
| KLHL15    | -0.461431849 | 1.95477E-20 | 2.77274E-19 |
| ZNF136    | -0.461351401 | 1.98849E-20 | 2.81855E-19 |
| MFAP3     | -0.461325086 | 1.99964E-20 | 2.83234E-19 |
| DNASE1L1  | -0.461195778 | 2.05533E-20 | 2.90917E-19 |
| ANKRD28   | -0.461118107 | 2.08952E-20 | 2.95545E-19 |
| AGPAT1    | 0.460937125  | 2.17137E-20 | 3.06904E-19 |
| PYCR1     | 0.460926387  | 2.17632E-20 | 3.07386E-19 |
| GCC2      | -0.460879369 | 2.19814E-20 | 3.10248E-19 |
| ZNF524    | 0.46084519   | 2.21414E-20 | 3.12285E-19 |
| C21orf70  | 0.46078011   | 2.24492E-20 | 3.16403E-19 |
| IREB2     | -0.460347649 | 2.46045E-20 | 3.46533E-19 |
| ATP5L     | 0.460337316  | 2.46584E-20 | 3.47047E-19 |
| GPR75     | -0.460212645 | 2.53181E-20 | 3.56022E-19 |
| RCBTB1    | -0.460210076 | 2.53319E-20 | 3.56022E-19 |
| FRRS1     | -0.460184889 | 2.54673E-20 | 3.57674E-19 |
| DPCD      | 0.460062446  | 2.6136E-20  | 3.66806E-19 |
| TCP11L2   | -0.460023652 | 2.63514E-20 | 3.69569E-19 |
| ZNF32     | 0.459979758  | 2.65973E-20 | 3.72747E-19 |
| EIF1      | 0.459976535  | 2.66154E-20 | 3.72747E-19 |
| NCRNA0021 | 0.459821115  | 2.75049E-20 | 3.84933E-19 |
| PUSL1     | 0.459736127  | 2.80036E-20 | 3.91637E-19 |

|          |              |             |             |
|----------|--------------|-------------|-------------|
| TNS1     | -0.459688893 | 2.82846E-20 | 3.95289E-19 |
| TBRG4    | 0.459578896  | 2.89498E-20 | 4.04302E-19 |
| EPHA4    | -0.459510778 | 2.93694E-20 | 4.09875E-19 |
| GABPA    | -0.459482318 | 2.95465E-20 | 4.12058E-19 |
| C5orf24  | -0.459317721 | 3.05915E-20 | 4.26333E-19 |
| ROBLD3   | 0.45930958   | 3.06441E-20 | 4.26768E-19 |
| ZCCHC11  | -0.45921916  | 3.12346E-20 | 4.34687E-19 |
| MAN1A1   | -0.459198442 | 3.13714E-20 | 4.36287E-19 |
| MRPL40   | 0.459076938  | 3.21861E-20 | 4.47303E-19 |
| BOLA1    | 0.45903108   | 3.24989E-20 | 4.51336E-19 |
| KIAA1715 | -0.458984591 | 3.28191E-20 | 4.55465E-19 |
| NDUFS1   | -0.458975873 | 3.28795E-20 | 4.55985E-19 |
| ZDHHC21  | -0.458887447 | 3.34982E-20 | 4.64243E-19 |
| FAM126B  | -0.458809299 | 3.40546E-20 | 4.71625E-19 |
| ZZEF1    | -0.458804001 | 3.40926E-20 | 4.71824E-19 |
| PEX13    | -0.45843328  | 3.68614E-20 | 5.09787E-19 |
| PPCDC    | 0.458424329  | 3.69309E-20 | 5.10394E-19 |
| PPM1B    | -0.45834272  | 3.75707E-20 | 5.18876E-19 |
| SF4      | 0.458317915  | 3.77673E-20 | 5.2095E-19  |
| ATF7     | -0.45831718  | 3.77731E-20 | 5.2095E-19  |
| VPS4B    | -0.458285118 | 3.80288E-20 | 5.24113E-19 |
| C11orf67 | 0.458238505  | 3.84035E-20 | 5.28912E-19 |
| NDUFS4   | 0.458216782  | 3.85794E-20 | 5.30967E-19 |
| TARBP2   | 0.458187756  | 3.88157E-20 | 5.3385E-19  |
| NR2F2    | -0.458114184 | 3.94209E-20 | 5.418E-19   |
| GAN      | -0.458106478 | 3.94848E-20 | 5.42304E-19 |
| CDC20    | 0.458086824  | 3.96483E-20 | 5.44174E-19 |
| ZFP106   | -0.45804781  | 3.99749E-20 | 5.48278E-19 |
| GTF3A    | 0.45771645   | 4.28573E-20 | 5.87407E-19 |
| TSEN34   | 0.457678964  | 4.3196E-20  | 5.91642E-19 |
| TRIM35   | -0.457632825 | 4.36164E-20 | 5.96991E-19 |
| C12orf62 | 0.457621973  | 4.37159E-20 | 5.97941E-19 |
| INTS6    | -0.457472585 | 4.51083E-20 | 6.16563E-19 |
| HIPK2    | -0.457451741 | 4.5306E-20  | 6.1884E-19  |
| CASD1    | -0.457314234 | 4.66319E-20 | 6.36514E-19 |
| IRAK3    | -0.457279403 | 4.69738E-20 | 6.40741E-19 |
| EFNB2    | -0.457274316 | 4.70239E-20 | 6.40986E-19 |
| C6orf48  | 0.457069877  | 4.90829E-20 | 6.68595E-19 |
| SUPT3H   | 0.457047604  | 4.93125E-20 | 6.71264E-19 |
| SKIL     | -0.457038838 | 4.94032E-20 | 6.72039E-19 |
| SLC5A4   | -0.456905281 | 5.08049E-20 | 6.90635E-19 |
| C3orf26  | 0.456848557  | 5.1412E-20  | 6.98411E-19 |
| C5orf36  | -0.456833385 | 5.15756E-20 | 7.00156E-19 |
| EXOSC8   | 0.456792162  | 5.20227E-20 | 7.05744E-19 |
| NEK9     | -0.456658741 | 5.34961E-20 | 7.25237E-19 |
| ATP10D   | -0.456595906 | 5.42041E-20 | 7.34336E-19 |



|           |              |             |             |
|-----------|--------------|-------------|-------------|
| ZNF619    | -0.45643409  | 5.60701E-20 | 7.591E-19   |
| ZXDA      | -0.456399469 | 5.64775E-20 | 7.64096E-19 |
| JAK2      | -0.45627961  | 5.79105E-20 | 7.82952E-19 |
| TAF9      | 0.456120071  | 5.98736E-20 | 8.08944E-19 |
| PSMD8     | 0.456082922  | 6.034E-20   | 8.14693E-19 |
| RNASEK    | 0.456077381  | 6.04099E-20 | 8.15084E-19 |
| BCCIP     | 0.456059523  | 6.06357E-20 | 8.17576E-19 |
| PUS1      | 0.456008295  | 6.12879E-20 | 8.2581E-19  |
| PCDH17    | -0.455977908 | 6.1678E-20  | 8.30505E-19 |
| ARHGEF10  | -0.455935412 | 6.22277E-20 | 8.3734E-19  |
| KLF8      | -0.455893887 | 6.27694E-20 | 8.4406E-19  |
| ZNF436    | -0.455731605 | 6.49316E-20 | 8.72546E-19 |
| MTP18     | 0.455719246  | 6.50993E-20 | 8.74209E-19 |
| SEL1L     | -0.455616237 | 6.65132E-20 | 8.92594E-19 |
| COX5B     | 0.455444893  | 6.89323E-20 | 9.24435E-19 |
| PDAP1     | 0.455259371  | 7.16492E-20 | 9.60225E-19 |
| ANO8      | -0.455221212 | 7.2221E-20  | 9.67236E-19 |
| SEC24A    | -0.45519344  | 7.26399E-20 | 9.72194E-19 |
| SRBD1     | -0.455176988 | 7.28892E-20 | 9.74335E-19 |
| KIAA1430  | -0.455176423 | 7.28978E-20 | 9.74335E-19 |
| ZC3H6     | -0.455135042 | 7.35287E-20 | 9.82108E-19 |
| LMBR1     | -0.455066024 | 7.45929E-20 | 9.95655E-19 |
| SLTM      | -0.455002103 | 7.5592E-20  | 1.00832E-18 |
| NEK7      | -0.454827214 | 7.83935E-20 | 1.04498E-18 |
| PIN4      | 0.454778849  | 7.91861E-20 | 1.05484E-18 |
| CNO       | 0.454585962  | 8.24263E-20 | 1.09727E-18 |
| DPM3      | 0.454540559  | 8.32078E-20 | 1.10694E-18 |
| NDUFB10   | 0.454465461  | 8.45164E-20 | 1.12359E-18 |
| PDE8A     | -0.45439155  | 8.58241E-20 | 1.14022E-18 |
| ITSN1     | -0.454331544 | 8.69004E-20 | 1.15361E-18 |
| UBE3C     | -0.454328908 | 8.6948E-20  | 1.15361E-18 |
| TECPR2    | -0.454299688 | 8.74772E-20 | 1.15986E-18 |
| ETFHDH    | -0.454283763 | 8.77669E-20 | 1.16293E-18 |
| IGFBP5    | -0.454094132 | 9.12906E-20 | 1.20881E-18 |
| CCDC23    | 0.454026423  | 9.25822E-20 | 1.2251E-18  |
| ZNF692    | 0.453968082  | 9.37095E-20 | 1.23919E-18 |
| TGFBR2    | -0.453955438 | 9.39556E-20 | 1.24162E-18 |
| SIRT7     | 0.453857543  | 9.58825E-20 | 1.26625E-18 |
| HAUS7     | 0.453820529  | 9.66212E-20 | 1.27516E-18 |
| MTG1      | 0.453785916  | 9.7317E-20  | 1.28349E-18 |
| C14orf135 | -0.453762886 | 9.77827E-20 | 1.28878E-18 |
| USF1      | 0.453739273  | 9.82625E-20 | 1.29424E-18 |
| ARFGAP1   | 0.453466831  | 1.03968E-19 | 1.36849E-18 |
| NR3C1     | -0.453463406 | 1.04042E-19 | 1.36856E-18 |
| PPP1R16A  | 0.453288406  | 1.07881E-19 | 1.41811E-18 |
| MAP4K5    | -0.45323686  | 1.09038E-19 | 1.43238E-18 |

|           |              |             |             |
|-----------|--------------|-------------|-------------|
| SP3       | -0.453223301 | 1.09344E-19 | 1.43545E-18 |
| FLJ45340  | -0.453186997 | 1.10168E-19 | 1.44532E-18 |
| PTPRG     | -0.45306883  | 1.12894E-19 | 1.48011E-18 |
| GSDMD     | 0.453041329  | 1.13538E-19 | 1.48758E-18 |
| DENND4A   | -0.452993282 | 1.14672E-19 | 1.50144E-18 |
| FAM198B   | -0.452892248 | 1.17092E-19 | 1.53212E-18 |
| MLST8     | 0.452873507  | 1.17547E-19 | 1.53706E-18 |
| DTNBP1    | 0.452848381  | 1.18159E-19 | 1.54405E-18 |
| FAM50A    | 0.452730698  | 1.21067E-19 | 1.58102E-18 |
| DYNLL2    | -0.452694008 | 1.21988E-19 | 1.592E-18   |
| SIRT6     | 0.452637169  | 1.23429E-19 | 1.60974E-18 |
| LMNA      | 0.452579262  | 1.24913E-19 | 1.62804E-18 |
| EBF2      | -0.452494565 | 1.27117E-19 | 1.65568E-18 |
| RCHY1     | -0.452419155 | 1.29111E-19 | 1.68055E-18 |
| HSF1      | 0.452282378  | 1.32806E-19 | 1.72752E-18 |
| TBC1D2B   | -0.452253705 | 1.33594E-19 | 1.73664E-18 |
| RSBN1     | -0.452112296 | 1.37547E-19 | 1.78614E-18 |
| PRR24     | 0.452111063  | 1.37582E-19 | 1.78614E-18 |
| BTAF1     | -0.452087775 | 1.38244E-19 | 1.79357E-18 |
| OGFOD2    | 0.451979008  | 1.41378E-19 | 1.83304E-18 |
| TLN1      | -0.451970491 | 1.41627E-19 | 1.83506E-18 |
| PPOX      | 0.451869864  | 1.44594E-19 | 1.87229E-18 |
| AKT1S1    | 0.451809902  | 1.4639E-19  | 1.89433E-18 |
| POLR3C    | 0.45177275   | 1.47515E-19 | 1.90764E-18 |
| EIF4G3    | -0.451716184 | 1.49243E-19 | 1.92873E-18 |
| LOC100128 | -0.45170942  | 1.49451E-19 | 1.93017E-18 |
| SLC30A6   | -0.451663398 | 1.50874E-19 | 1.94728E-18 |
| LRRC37A4  | -0.451491734 | 1.56299E-19 | 2.016E-18   |
| AAAS      | 0.451424427  | 1.58479E-19 | 2.04278E-18 |
| CASP8AP2  | -0.451406467 | 1.59065E-19 | 2.04902E-18 |
| CCDC90A   | 0.451364748  | 1.60436E-19 | 2.06534E-18 |
| MRPL10    | 0.450849411  | 1.78357E-19 | 2.29456E-18 |
| WBSCR22   | 0.45078388   | 1.80772E-19 | 2.32413E-18 |
| MGC16384  | -0.45076195  | 1.81588E-19 | 2.33311E-18 |
| LYSMD4    | 0.450749722  | 1.82044E-19 | 2.33747E-18 |
| EFHA2     | -0.450685705 | 1.84452E-19 | 2.36685E-18 |
| NBPF16    | -0.450655871 | 1.85584E-19 | 2.37985E-18 |
| PAF1      | 0.450652491  | 1.85713E-19 | 2.37997E-18 |
| MAP4K3    | -0.450646405 | 1.85945E-19 | 2.38141E-18 |
| HMBOX1    | -0.450392692 | 1.95876E-19 | 2.50699E-18 |
| C2orf79   | 0.450331555  | 1.98347E-19 | 2.53698E-18 |
| NDUFB3    | 0.449997588  | 2.12391E-19 | 2.71487E-18 |
| CCDC101   | 0.449874493  | 2.1781E-19  | 2.78236E-18 |
| ARHGAP20  | -0.449741345 | 2.23826E-19 | 2.85736E-18 |
| IRF3      | 0.449644568  | 2.283E-19   | 2.91262E-18 |
| ZNF654    | -0.449588729 | 2.30922E-19 | 2.94418E-18 |

|           |              |             |             |
|-----------|--------------|-------------|-------------|
| RNF6      | -0.449580011 | 2.31334E-19 | 2.94754E-18 |
| POLL      | 0.449391375  | 2.40427E-19 | 3.06145E-18 |
| CMC1      | 0.44930515   | 2.447E-19   | 3.11386E-18 |
| RPL23P8   | 0.44917467   | 2.51308E-19 | 3.19591E-18 |
| APOA1BP   | 0.449034572  | 2.58599E-19 | 3.28653E-18 |
| FEM1C     | -0.448803908 | 2.71058E-19 | 3.44268E-18 |
| IKZF3     | -0.448745267 | 2.74319E-19 | 3.48188E-18 |
| PPP1CA    | 0.448700759  | 2.7682E-19  | 3.51138E-18 |
| AFF4      | -0.448693118 | 2.77251E-19 | 3.51461E-18 |
| DIS3L     | -0.448528824 | 2.86692E-19 | 3.63197E-18 |
| ZFX       | -0.448519055 | 2.87263E-19 | 3.6369E-18  |
| C17orf106 | 0.448451519  | 2.91242E-19 | 3.68494E-18 |
| HCFC1R1   | 0.448397954  | 2.94437E-19 | 3.72299E-18 |
| KRBA2     | -0.44829288  | 3.00805E-19 | 3.80109E-18 |
| RPS4X     | 0.448155981  | 3.09304E-19 | 3.90602E-18 |
| SPRED2    | -0.44802662  | 3.17553E-19 | 4.00764E-18 |
| ZEB2      | -0.447818773 | 3.31261E-19 | 4.178E-18   |
| ADRA1A    | -0.447609342 | 3.45663E-19 | 4.35596E-18 |
| ARHGAP23  | -0.447607271 | 3.45808E-19 | 4.35596E-18 |
| TBCA      | 0.447578069  | 3.47865E-19 | 4.3791E-18  |
| SLC35D1   | -0.44753481  | 3.50935E-19 | 4.41495E-18 |
| WDR85     | 0.447525525  | 3.51597E-19 | 4.42049E-18 |
| NT5C3L    | 0.447357076  | 3.63829E-19 | 4.57139E-18 |
| PRRG4     | -0.447287447 | 3.69007E-19 | 4.63352E-18 |
| MED8      | 0.447253008  | 3.71594E-19 | 4.66047E-18 |
| CUL5      | -0.447252659 | 3.71621E-19 | 4.66047E-18 |
| SNX19     | -0.446894662 | 3.996E-19   | 5.00821E-18 |
| C19orf70  | 0.44681279   | 4.06285E-19 | 5.08793E-18 |
| C12orf57  | 0.446807826  | 4.06694E-19 | 5.08793E-18 |
| BRWD3     | -0.446807412 | 4.06728E-19 | 5.08793E-18 |
| TAB2      | -0.446796088 | 4.07662E-19 | 5.09641E-18 |
| CDC42EP3  | -0.446777959 | 4.09162E-19 | 5.11195E-18 |
| C10orf128 | -0.446691856 | 4.1636E-19  | 5.19863E-18 |
| SLMAP     | -0.446600744 | 4.24113E-19 | 5.29211E-18 |
| PRKAG2    | -0.446525801 | 4.30596E-19 | 5.36964E-18 |
| TRRAP     | -0.446499983 | 4.32852E-19 | 5.39439E-18 |
| GLI4      | 0.446493165  | 4.33449E-19 | 5.39846E-18 |
| MAZ       | 0.446484083  | 4.34247E-19 | 5.40502E-18 |
| C9orf23   | 0.446244637  | 4.55799E-19 | 5.66973E-18 |
| PITPNM2   | -0.44607514  | 4.71688E-19 | 5.86371E-18 |
| IFT20     | 0.446039725  | 4.75076E-19 | 5.90215E-18 |
| CYC1      | 0.446001313  | 4.78778E-19 | 5.94443E-18 |
| SLC39A7   | 0.44595352   | 4.83424E-19 | 5.99837E-18 |
| C15orf61  | 0.445943045  | 4.84448E-19 | 6.00733E-18 |
| LLPH      | 0.445925528  | 4.86165E-19 | 6.02488E-18 |
| PMVK      | 0.445785606  | 5.00099E-19 | 6.1937E-18  |

|           |              |             |             |
|-----------|--------------|-------------|-------------|
| THAP7     | 0.445758225  | 5.02872E-19 | 6.22417E-18 |
| BAT2L1    | -0.445708024 | 5.07994E-19 | 6.28366E-18 |
| SMYD5     | 0.445681331  | 5.10738E-19 | 6.31369E-18 |
| RRAGC     | -0.445676368 | 5.1125E-19  | 6.3161E-18  |
| PREX2     | -0.445578944 | 5.21401E-19 | 6.43751E-18 |
| ARFIP1    | -0.445545294 | 5.24953E-19 | 6.47735E-18 |
| MED27     | 0.445528732  | 5.2671E-19  | 6.495E-18   |
| PPP1R14B  | 0.445502688  | 5.29485E-19 | 6.52518E-18 |
| IDH3B     | 0.445416988  | 5.38717E-19 | 6.63484E-18 |
| TK1       | 0.445393153  | 5.41312E-19 | 6.66269E-18 |
| LOC389333 | -0.445240936 | 5.58181E-19 | 6.86607E-18 |
| SEC23A    | -0.445202834 | 5.62484E-19 | 6.91473E-18 |
| H2AFX     | 0.445140849  | 5.69553E-19 | 6.99732E-18 |
| METTL11A  | 0.445104796  | 5.73705E-19 | 7.04398E-18 |
| RPP38     | 0.445087365  | 5.75723E-19 | 7.06441E-18 |
| STARD3    | 0.445069461  | 5.77804E-19 | 7.08557E-18 |
| RBM22     | 0.444946293  | 5.92316E-19 | 7.25905E-18 |
| ARF5      | 0.444919032  | 5.95576E-19 | 7.29452E-18 |
| HIF1A     | -0.444760115 | 6.14934E-19 | 7.52699E-18 |
| SYNJ2     | -0.444717716 | 6.20203E-19 | 7.58682E-18 |
| CD2BP2    | 0.444661865  | 6.27211E-19 | 7.66784E-18 |
| B4GALT7   | 0.444468283  | 6.5211E-19  | 7.96734E-18 |
| SRM       | 0.444337723  | 6.69449E-19 | 8.17417E-18 |
| C6orf226  | 0.444298365  | 6.74764E-19 | 8.23402E-18 |
| MTMR14    | 0.444151982  | 6.949E-19   | 8.47454E-18 |
| BTBD19    | -0.444132181 | 6.97669E-19 | 8.5031E-18  |
| POMP      | 0.444075004  | 7.05725E-19 | 8.59603E-18 |
| ATG7      | 0.44403015   | 7.12108E-19 | 8.66848E-18 |
| C14orf119 | 0.444024928  | 7.12855E-19 | 8.67227E-18 |
| SHE       | -0.44396741  | 7.21133E-19 | 8.76435E-18 |
| PSMD9     | 0.443966226  | 7.21304E-19 | 8.76435E-18 |
| NDUFC2    | 0.443924331  | 7.27395E-19 | 8.83297E-18 |
| RPS6KA2   | -0.443905704 | 7.30119E-19 | 8.86064E-18 |
| SNHG3     | 0.443783097  | 7.48301E-19 | 9.07576E-18 |
| GPR20     | -0.443699519 | 7.60949E-19 | 9.22356E-18 |
| NDUFAF3   | 0.443643992  | 7.69469E-19 | 9.32115E-18 |
| NDUFB2    | 0.443574614  | 7.80245E-19 | 9.44595E-18 |
| AR        | -0.44351936  | 7.88934E-19 | 9.54534E-18 |
| ARHGAP31  | -0.443474367 | 7.9608E-19  | 9.62594E-18 |
| MYOF      | -0.443410101 | 8.06396E-19 | 9.74477E-18 |
| CREBBP    | -0.443221596 | 8.37422E-19 | 1.01136E-17 |
| LYSMD3    | -0.443187482 | 8.43161E-19 | 1.01767E-17 |
| WDR4      | 0.443157964  | 8.48158E-19 | 1.02257E-17 |
| TRMT1     | 0.44315745   | 8.48245E-19 | 1.02257E-17 |
| LRRC40    | -0.443107715 | 8.56731E-19 | 1.03217E-17 |
| GTF3C5    | 0.443069767  | 8.63262E-19 | 1.03941E-17 |

|           |              |             |             |
|-----------|--------------|-------------|-------------|
| COPE      | 0.443062805  | 8.64466E-19 | 1.04023E-17 |
| NCKAP1    | -0.44303416  | 8.69435E-19 | 1.04558E-17 |
| NHLRC3    | -0.442950323 | 8.8414E-19  | 1.06262E-17 |
| TCF4      | -0.442938858 | 8.8617E-19  | 1.06442E-17 |
| ANP32A    | 0.442796106  | 9.11833E-19 | 1.09458E-17 |
| 44085     | -0.442324359 | 1.00195E-18 | 1.20203E-17 |
| SRRM2     | -0.442215857 | 1.02388E-18 | 1.22761E-17 |
| RNASEH2C  | 0.442098689  | 1.0481E-18  | 1.25589E-17 |
| CYB561D2  | 0.442067697  | 1.0546E-18  | 1.26292E-17 |
| RPL26     | 0.442059483  | 1.05633E-18 | 1.26423E-17 |
| RAB6A     | -0.442007655 | 1.0673E-18  | 1.27659E-17 |
| H3F3A     | 0.441962277  | 1.077E-18   | 1.28742E-17 |
| AKAP8L    | 0.441958446  | 1.07782E-18 | 1.28763E-17 |
| ETFB      | 0.441781501  | 1.11652E-18 | 1.33306E-17 |
| TJPI      | -0.441776176 | 1.1177E-18  | 1.33367E-17 |
| SERINC3   | -0.441710428 | 1.13244E-18 | 1.35045E-17 |
| NIPSNAP3B | -0.441702021 | 1.13434E-18 | 1.3519E-17  |
| RRP7A     | 0.441627242  | 1.15136E-18 | 1.37137E-17 |
| C19orf10  | 0.441596134  | 1.15851E-18 | 1.37907E-17 |
| KIAA1468  | -0.441490749 | 1.18308E-18 | 1.40747E-17 |
| FKBP2     | 0.44148029   | 1.18555E-18 | 1.40956E-17 |
| AKR1C3    | 0.44140708   | 1.20295E-18 | 1.4294E-17  |
| TRIM22    | -0.441389017 | 1.20728E-18 | 1.43369E-17 |
| NPHP3     | -0.441370043 | 1.21185E-18 | 1.43826E-17 |
| HIVEP3    | -0.441323916 | 1.22302E-18 | 1.45065E-17 |
| TNFRSF10B | -0.441293285 | 1.2305E-18  | 1.45865E-17 |
| BAZ1A     | -0.441278861 | 1.23403E-18 | 1.46197E-17 |
| C1orf91   | 0.441234079  | 1.24507E-18 | 1.47418E-17 |
| G3BP2     | -0.441222907 | 1.24784E-18 | 1.47658E-17 |
| KIAA0776  | -0.441055445 | 1.29009E-18 | 1.52567E-17 |
| SCARF1    | -0.441017829 | 1.29978E-18 | 1.5362E-17  |
| IMP3      | 0.440923781  | 1.3243E-18  | 1.56426E-17 |
| ZNF827    | -0.440885593 | 1.33438E-18 | 1.57524E-17 |
| BMP2K     | -0.440880528 | 1.33573E-18 | 1.57589E-17 |
| TMEM30A   | -0.440841727 | 1.34606E-18 | 1.58714E-17 |
| MEIS3P1   | -0.440765318 | 1.36665E-18 | 1.60964E-17 |
| WASH5P    | 0.440764893  | 1.36676E-18 | 1.60964E-17 |
| PCGF1     | 0.440680472  | 1.38987E-18 | 1.63589E-17 |
| COL8A1    | -0.440674002 | 1.39165E-18 | 1.63702E-17 |
| RAB33B    | -0.440635049 | 1.40246E-18 | 1.64876E-17 |
| DCTPP1    | 0.440630851  | 1.40363E-18 | 1.64916E-17 |
| CENPV     | 0.440511633  | 1.43723E-18 | 1.68765E-17 |
| CREBZF    | -0.440420716 | 1.46339E-18 | 1.71735E-17 |
| RPF2      | 0.440385621  | 1.47362E-18 | 1.72833E-17 |
| DENND2C   | -0.44032951  | 1.49011E-18 | 1.74664E-17 |
| TSHZ3     | -0.440318442 | 1.49338E-18 | 1.74832E-17 |

|           |              |             |             |
|-----------|--------------|-------------|-------------|
| EEFSEC    | 0.440317066  | 1.49379E-18 | 1.74832E-17 |
| LOC729176 | -0.440315782 | 1.49417E-18 | 1.74832E-17 |
| SAMHD1    | -0.440283221 | 1.50385E-18 | 1.75845E-17 |
| C12orf35  | -0.440280717 | 1.50459E-18 | 1.75845E-17 |
| LOC643387 | 0.440243101  | 1.51586E-18 | 1.77057E-17 |
| SEC31A    | -0.440221719 | 1.5223E-18  | 1.77705E-17 |
| TSPYL4    | -0.440083975 | 1.56443E-18 | 1.82517E-17 |
| SDHAF1    | 0.439982445  | 1.59621E-18 | 1.86116E-17 |
| RFNG      | 0.439960251  | 1.60325E-18 | 1.86827E-17 |
| AUTS2     | -0.439832244 | 1.64441E-18 | 1.91511E-17 |
| SLC25A46  | -0.439758724 | 1.66851E-18 | 1.9412E-17  |
| IDS       | -0.439757971 | 1.66876E-18 | 1.9412E-17  |
| MPST      | 0.439674241  | 1.69665E-18 | 1.97249E-17 |
| UBE2F     | 0.439597578  | 1.72258E-18 | 2.00147E-17 |
| NDUFB1    | 0.439455505  | 1.77167E-18 | 2.0573E-17  |
| RNF113A   | 0.439433129  | 1.77952E-18 | 2.06522E-17 |
| FAM45B    | -0.439331908 | 1.81549E-18 | 2.10574E-17 |
| F8        | -0.439292882 | 1.82955E-18 | 2.12081E-17 |
| RDX       | -0.439284407 | 1.83262E-18 | 2.12313E-17 |
| THSD4     | -0.439205879 | 1.86128E-18 | 2.15508E-17 |
| STMN1     | 0.439070447  | 1.91174E-18 | 2.21222E-17 |
| RBM27     | -0.438933991 | 1.96395E-18 | 2.27131E-17 |
| LOC729799 | -0.438919325 | 1.96964E-18 | 2.27585E-17 |
| CAPNS1    | 0.438917992  | 1.97016E-18 | 2.27585E-17 |
| CYBRD1    | -0.438863997 | 1.99127E-18 | 2.2989E-17  |
| DBH       | -0.438748838 | 2.03703E-18 | 2.35038E-17 |
| RLF       | -0.438731599 | 2.04397E-18 | 2.35702E-17 |
| TIGD5     | 0.438719638  | 2.0488E-18  | 2.36122E-17 |
| STAM2     | -0.438706918 | 2.05395E-18 | 2.36578E-17 |
| ATOX1     | 0.43864339   | 2.07984E-18 | 2.39422E-17 |
| NCOR1     | -0.438599922 | 2.09775E-18 | 2.41344E-17 |
| FAM107B   | -0.438453407 | 2.15922E-18 | 2.48273E-17 |
| PPM1G     | 0.438431538  | 2.16855E-18 | 2.49201E-17 |
| RNF125    | -0.438346395 | 2.20523E-18 | 2.53271E-17 |
| MAP3K13   | -0.438330305 | 2.21224E-18 | 2.53929E-17 |
| FBN1      | -0.438083806 | 2.32227E-18 | 2.66406E-17 |
| SLC35A5   | -0.438077635 | 2.32509E-18 | 2.66576E-17 |
| SNX9      | -0.437952618 | 2.38301E-18 | 2.73059E-17 |
| KIAA1712  | -0.43794071  | 2.3886E-18  | 2.73542E-17 |
| CENPW     | 0.437897051  | 2.4092E-18  | 2.75743E-17 |
| ZNF275    | -0.437671795 | 2.51832E-18 | 2.88066E-17 |
| FRMD3     | -0.437556897 | 2.57584E-18 | 2.94476E-17 |
| PTPN21    | -0.43754676  | 2.58097E-18 | 2.94894E-17 |
| C19orf24  | 0.437496658  | 2.6065E-18  | 2.97641E-17 |
| SLC35B2   | 0.437491966  | 2.60891E-18 | 2.97744E-17 |
| ZFYVE9    | -0.437334125 | 2.69105E-18 | 3.06944E-17 |

|          |              |             |             |
|----------|--------------|-------------|-------------|
| AOC3     | -0.437207277 | 2.75891E-18 | 3.14503E-17 |
| TOR1AIP1 | -0.43714229  | 2.79432E-18 | 3.18358E-17 |
| PSME2    | 0.437105631  | 2.81449E-18 | 3.20473E-17 |
| TEP1     | -0.43701756  | 2.86354E-18 | 3.25871E-17 |
| PLEKHA7  | -0.436866136 | 2.94985E-18 | 3.35501E-17 |
| GNE      | -0.436751808 | 3.0167E-18  | 3.42909E-17 |
| ATP11A   | -0.436410129 | 3.2255E-18  | 3.66434E-17 |
| MRPS9    | 0.436326163  | 3.27895E-18 | 3.72175E-17 |
| CD93     | -0.436324883 | 3.27977E-18 | 3.72175E-17 |
| MLLT4    | -0.436240219 | 3.33456E-18 | 3.78177E-17 |
| ADAMTS1  | -0.436179507 | 3.3744E-18  | 3.82477E-17 |
| APRT     | 0.436012593  | 3.48636E-18 | 3.94943E-17 |
| C18orf25 | -0.435984031 | 3.50588E-18 | 3.96928E-17 |
| LRRFIP1  | -0.435880733 | 3.57738E-18 | 4.04793E-17 |
| GALNT11  | -0.435867715 | 3.5865E-18  | 4.05443E-17 |
| SMAD9    | -0.435866711 | 3.5872E-18  | 4.05443E-17 |
| RPL13AP3 | 0.435820873  | 3.61947E-18 | 4.08859E-17 |
| SNTB2    | -0.435778114 | 3.64984E-18 | 4.12055E-17 |
| BCL2L2   | -0.435708826 | 3.69957E-18 | 4.17433E-17 |
| TMOD2    | -0.435614765 | 3.76815E-18 | 4.2493E-17  |
| ASH1L    | -0.435610126 | 3.77156E-18 | 4.25075E-17 |
| SCP2     | -0.43558571  | 3.78958E-18 | 4.26864E-17 |
| VDAC2    | 0.4355715    | 3.80011E-18 | 4.27601E-17 |
| CEP170   | -0.435571085 | 3.80042E-18 | 4.27601E-17 |
| SPRY3    | -0.43555089  | 3.81543E-18 | 4.29047E-17 |
| ANP32B   | 0.435543784  | 3.82073E-18 | 4.294E-17   |
| C19orf50 | 0.435100322  | 4.16593E-18 | 4.67933E-17 |
| FTHL3    | 0.435003674  | 4.24514E-18 | 4.76561E-17 |
| SLC10A7  | -0.43498199  | 4.26311E-18 | 4.78309E-17 |
| KLHDC1   | -0.434861394 | 4.36445E-18 | 4.89403E-17 |
| DUS1L    | 0.434846341  | 4.37726E-18 | 4.90564E-17 |
| SRRM1    | -0.434774407 | 4.43901E-18 | 4.97204E-17 |
| ITGA9    | -0.434671585 | 4.52875E-18 | 5.06971E-17 |
| RUNDC2A  | -0.434635958 | 4.56026E-18 | 5.10212E-17 |
| DGUOK    | 0.434598219  | 4.59388E-18 | 5.13684E-17 |
| AURKAIP1 | 0.434536949  | 4.64897E-18 | 5.19552E-17 |
| LIMD1    | -0.434487326 | 4.69407E-18 | 5.24298E-17 |
| TRMT11   | -0.434369858 | 4.80254E-18 | 5.36113E-17 |
| APIAR    | -0.434320278 | 4.84906E-18 | 5.41002E-17 |
| TRMT61A  | 0.434283589  | 4.88376E-18 | 5.4457E-17  |
| MORN2    | 0.434172838  | 4.99002E-18 | 5.56107E-17 |
| TUBA1C   | 0.434043563  | 5.11693E-18 | 5.69931E-17 |
| SNX18    | -0.434003709 | 5.15669E-18 | 5.74039E-17 |
| SLC35C2  | 0.433989085  | 5.17136E-18 | 5.7535E-17  |
| TMEM93   | 0.433957004  | 5.20368E-18 | 5.78622E-17 |
| KIFC1    | 0.433925595  | 5.23551E-18 | 5.81837E-17 |

|          |              |             |             |
|----------|--------------|-------------|-------------|
| ZCCHC17  | 0.433719214  | 5.44948E-18 | 6.05278E-17 |
| GAS2L3   | -0.433364584 | 5.83741E-18 | 6.48004E-17 |
| TUBA1B   | 0.433294357  | 5.91738E-18 | 6.56516E-17 |
| F2R      | -0.433285218 | 5.92787E-18 | 6.57314E-17 |
| RPL10    | 0.433141854  | 6.09479E-18 | 6.75447E-17 |
| FBXO22OS | 0.433128044  | 6.11111E-18 | 6.76879E-17 |
| RAB13    | 0.433100293  | 6.14404E-18 | 6.80147E-17 |
| WRN      | -0.432876034 | 6.4166E-18  | 7.09926E-17 |
| MANEA    | -0.432580825 | 6.79358E-18 | 7.51217E-17 |
| NIPAL1   | -0.43251652  | 6.87854E-18 | 7.6019E-17  |
| SLAIN2   | -0.431874376 | 7.78634E-18 | 8.60038E-17 |
| TMEM150C | -0.431722261 | 8.01807E-18 | 8.85143E-17 |
| FKBP3    | 0.431714127  | 8.03065E-18 | 8.86041E-17 |
| THAP8    | 0.431709668  | 8.03755E-18 | 8.86311E-17 |
| STX17    | -0.431653924 | 8.12436E-18 | 8.95389E-17 |
| TBK1     | -0.431360825 | 8.5962E-18  | 9.46866E-17 |
| UBA6     | -0.431315794 | 8.67104E-18 | 9.54581E-17 |
| HMBS     | 0.431232906  | 8.81048E-18 | 9.69396E-17 |
| TKT      | 0.431077006  | 9.07873E-18 | 9.98359E-17 |
| ZNF511   | 0.430995213  | 9.22266E-18 | 1.01363E-16 |
| ELF2     | -0.430948176 | 9.30644E-18 | 1.02227E-16 |
| DIP2A    | -0.430794223 | 9.58594E-18 | 1.05239E-16 |
| UBL3     | -0.430733591 | 9.69826E-18 | 1.06414E-16 |
| ATP8B5P  | 0.430714784  | 9.73336E-18 | 1.0674E-16  |
| SYNJ2BP  | -0.430592812 | 9.96407E-18 | 1.0921E-16  |
| PA2G4P4  | 0.430536621  | 1.00722E-17 | 1.10334E-16 |
| FAM83G   | -0.430479451 | 1.01833E-17 | 1.1149E-16  |
| COX8A    | 0.430453125  | 1.02349E-17 | 1.11993E-16 |
| PDE2A    | -0.430350625 | 1.04382E-17 | 1.14155E-16 |
| SOCS6    | -0.430294379 | 1.05515E-17 | 1.15331E-16 |
| IL7R     | -0.429856238 | 1.14759E-17 | 1.25351E-16 |
| NNAT     | -0.429854012 | 1.14808E-17 | 1.25351E-16 |
| ALKBH4   | 0.429815963  | 1.15648E-17 | 1.26199E-16 |
| GOPC     | -0.429783807 | 1.16363E-17 | 1.26909E-16 |
| MRPL21   | 0.429755253  | 1.17001E-17 | 1.27524E-16 |
| CIB1     | 0.429752874  | 1.17054E-17 | 1.27524E-16 |
| ANKZF1   | 0.429645102  | 1.19494E-17 | 1.30111E-16 |
| DOPEY1   | -0.429636965 | 1.19681E-17 | 1.30243E-16 |
| TANC1    | -0.429452527 | 1.2398E-17  | 1.34848E-16 |
| ST8SIA6  | -0.42938142  | 1.25678E-17 | 1.3662E-16  |
| C8orf37  | -0.429337237 | 1.26744E-17 | 1.37704E-16 |
| ZFP36L1  | -0.429327381 | 1.26983E-17 | 1.37888E-16 |
| ZNF354B  | -0.429256158 | 1.28724E-17 | 1.39703E-16 |
| BNIP1    | 0.429226343  | 1.2946E-17  | 1.40425E-16 |
| KLF13    | -0.429186775 | 1.30443E-17 | 1.41414E-16 |
| DUSP23   | 0.429058431  | 1.33682E-17 | 1.44846E-16 |



|           |              |             |             |
|-----------|--------------|-------------|-------------|
| CEP97     | -0.428947705 | 1.36539E-17 | 1.47862E-16 |
| VPS16     | 0.428931056  | 1.36974E-17 | 1.48252E-16 |
| GLYR1     | -0.428898497 | 1.37828E-17 | 1.49096E-16 |
| TRAK1     | -0.428661581 | 1.44204E-17 | 1.55908E-16 |
| UCKL1     | 0.428628314  | 1.45122E-17 | 1.56816E-16 |
| C21orf91  | -0.42862418  | 1.45237E-17 | 1.56854E-16 |
| RAPH1     | -0.42832627  | 1.53726E-17 | 1.65932E-16 |
| CYTH3     | -0.428243688 | 1.56164E-17 | 1.68473E-16 |
| C19orf43  | 0.428143816  | 1.59164E-17 | 1.71616E-16 |
| GOLGA6L5  | -0.428117379 | 1.59967E-17 | 1.72389E-16 |
| RAD23A    | 0.428068916  | 1.61451E-17 | 1.73893E-16 |
| CDC25C    | 0.427941399  | 1.65418E-17 | 1.7807E-16  |
| SCRN3     | -0.427859274 | 1.68024E-17 | 1.80778E-16 |
| KIAA0562  | -0.427789651 | 1.70264E-17 | 1.83089E-16 |
| MGAT2     | -0.427773044 | 1.70803E-17 | 1.8357E-16  |
| SPRY1     | -0.427729954 | 1.72209E-17 | 1.84981E-16 |
| SNX25     | -0.427667161 | 1.74278E-17 | 1.87102E-16 |
| CCT5      | 0.427602607  | 1.7643E-17  | 1.89311E-16 |
| NDUFA8    | 0.427510765  | 1.79538E-17 | 1.92541E-16 |
| LSM10     | 0.427473764  | 1.80805E-17 | 1.93796E-16 |
| MEGF9     | -0.427442819 | 1.81871E-17 | 1.94834E-16 |
| C14orf166 | 0.42731953   | 1.86182E-17 | 1.99344E-16 |
| RAB18     | -0.427203553 | 1.90328E-17 | 2.03674E-16 |
| CACNA1C   | -0.427065509 | 1.95381E-17 | 2.0897E-16  |
| DDX41     | 0.426998703  | 1.97874E-17 | 2.11523E-16 |
| RPL36AL   | 0.426988231  | 1.98268E-17 | 2.11799E-16 |
| ZBTB9     | 0.426986171  | 1.98345E-17 | 2.11799E-16 |
| CCDC132   | -0.426951227 | 1.99665E-17 | 2.13093E-16 |
| TM9SF2    | -0.426944285 | 1.99928E-17 | 2.1326E-16  |
| LOC440354 | -0.426871851 | 2.02694E-17 | 2.16095E-16 |
| ATP6V1F   | 0.426680601  | 2.10179E-17 | 2.23955E-16 |
| C14orf167 | -0.426580961 | 2.14186E-17 | 2.28102E-16 |
| ACTR2     | -0.426499583 | 2.17514E-17 | 2.31522E-16 |
| SMARCA5   | -0.426438479 | 2.20046E-17 | 2.34092E-16 |
| MIB1      | -0.426334088 | 2.24439E-17 | 2.38638E-16 |
| TBC1D23   | -0.426095177 | 2.3482E-17  | 2.49543E-16 |
| ATP11C    | -0.425936228 | 2.41986E-17 | 2.57022E-16 |
| SNHG9     | 0.425917247  | 2.42856E-17 | 2.57808E-16 |
| ZNF627    | -0.425837315 | 2.46554E-17 | 2.61594E-16 |
| CHSY1     | -0.4257272   | 2.51738E-17 | 2.66952E-16 |
| SPNS1     | 0.425564097  | 2.59615E-17 | 2.75159E-16 |
| NAT1      | -0.425461153 | 2.64711E-17 | 2.8041E-16  |
| RANBP2    | -0.425447465 | 2.65395E-17 | 2.80986E-16 |
| CENPB     | 0.425392337  | 2.68172E-17 | 2.83775E-16 |
| RBMS3     | -0.425325642 | 2.71568E-17 | 2.87216E-16 |
| NPM3      | 0.425308294  | 2.72459E-17 | 2.88005E-16 |

|            |              |             |             |
|------------|--------------|-------------|-------------|
| CDK5RAP3   | 0.425210661  | 2.77524E-17 | 2.93203E-16 |
| C1orf192   | -0.425116252 | 2.82509E-17 | 2.98312E-16 |
| CUTC       | 0.425023801  | 2.87477E-17 | 3.03397E-16 |
| HAX1       | 0.424989696  | 2.89331E-17 | 3.05192E-16 |
| MED7       | 0.424794364  | 3.00178E-17 | 3.16466E-16 |
| KIAA0664P3 | -0.424778153 | 3.01096E-17 | 3.17266E-16 |
| TPI1       | 0.424584771  | 3.12262E-17 | 3.28858E-16 |
| BOLA3      | 0.424401271  | 3.23233E-17 | 3.40232E-16 |
| LNX2       | -0.424327859 | 3.27727E-17 | 3.4478E-16  |
| ZC3H7B     | -0.424141797 | 3.39395E-17 | 3.56866E-16 |
| ZFP36      | -0.42407258  | 3.43839E-17 | 3.61348E-16 |
| ZSWIM6     | -0.424052615 | 3.45131E-17 | 3.62515E-16 |
| RCOR1      | -0.423931221 | 3.53092E-17 | 3.70682E-16 |
| LMAN2      | 0.423921844  | 3.53715E-17 | 3.7114E-16  |
| NIPBL      | -0.423639598 | 3.72962E-17 | 3.91129E-16 |
| TMOD3      | -0.4236333   | 3.73403E-17 | 3.91386E-16 |
| GPLOW      | 0.423621142  | 3.74256E-17 | 3.92073E-16 |
| CENPP      | 0.423603488  | 3.75498E-17 | 3.93167E-16 |
| OIT3       | -0.423576386 | 3.77412E-17 | 3.94964E-16 |
| NOTCH2     | -0.423543375 | 3.79756E-17 | 3.97208E-16 |
| TNFSF8     | -0.423500211 | 3.82843E-17 | 4.00227E-16 |
| CCT4       | 0.423459646  | 3.85767E-17 | 4.03072E-16 |
| DDX6       | -0.423441615 | 3.87074E-17 | 4.04225E-16 |
| UBE2T      | 0.423384705  | 3.91226E-17 | 4.08347E-16 |
| MYBL2      | 0.423375784  | 3.91881E-17 | 4.08817E-16 |
| FEM1B      | -0.423370502 | 3.92269E-17 | 4.09008E-16 |
| ANTXR2     | -0.42334341  | 3.94267E-17 | 4.10875E-16 |
| CHMP4B     | 0.423325631  | 3.95583E-17 | 4.12031E-16 |
| NKTR       | -0.42325831  | 4.00606E-17 | 4.17045E-16 |
| NRIP1      | -0.423233399 | 4.0248E-17  | 4.18777E-16 |
| TRIM11     | 0.423225368  | 4.03086E-17 | 4.19189E-16 |
| LUZP1      | -0.423163245 | 4.07806E-17 | 4.23875E-16 |
| C3orf75    | 0.423124792  | 4.10754E-17 | 4.26717E-16 |
| NUP37      | 0.423102486  | 4.12474E-17 | 4.2828E-16  |
| RHOJ       | -0.423086381 | 4.1372E-17  | 4.2935E-16  |
| CINP       | 0.423058992  | 4.15848E-17 | 4.31334E-16 |
| ZFAND2A    | 0.423030079  | 4.18105E-17 | 4.3345E-16  |
| C10orf18   | -0.422981156 | 4.21953E-17 | 4.37211E-16 |
| PELP1      | 0.422889674  | 4.29242E-17 | 4.44532E-16 |
| TMEM133    | -0.422736051 | 4.4176E-17  | 4.57259E-16 |
| IGF2R      | -0.422641729 | 4.49623E-17 | 4.65156E-16 |
| TOB2       | -0.422385958 | 4.71644E-17 | 4.87684E-16 |
| ZBTB11     | -0.42234441  | 4.7532E-17  | 4.91225E-16 |
| ANKRD44    | -0.422341689 | 4.75562E-17 | 4.91225E-16 |
| HIST2H2AC  | 0.422331125  | 4.76501E-17 | 4.9194E-16  |
| C9orf142   | 0.422248008  | 4.83957E-17 | 4.99379E-16 |

|           |              |             |             |
|-----------|--------------|-------------|-------------|
| FAM76B    | -0.422195381 | 4.88737E-17 | 5.0405E-16  |
| TRAPPC5   | 0.422184568  | 4.89725E-17 | 5.04807E-16 |
| MKLN1     | -0.422148251 | 4.93058E-17 | 5.07979E-16 |
| TOP1MT    | 0.42207088   | 5.00231E-17 | 5.15104E-16 |
| VGLL3     | -0.422048776 | 5.02299E-17 | 5.16966E-16 |
| U2AF1     | 0.422018937  | 5.05105E-17 | 5.19585E-16 |
| CNTN4     | -0.422007342 | 5.06199E-17 | 5.20429E-16 |
| C1orf50   | 0.422004706  | 5.06448E-17 | 5.20429E-16 |
| PTPN9     | -0.421978394 | 5.08941E-17 | 5.22721E-16 |
| TSPO2     | 0.421953347  | 5.11325E-17 | 5.24899E-16 |
| MMRN2     | -0.421919667 | 5.14549E-17 | 5.27936E-16 |
| NID2      | -0.421905555 | 5.15905E-17 | 5.29055E-16 |
| CPNE8     | -0.421828449 | 5.23379E-17 | 5.36443E-16 |
| SRPK2     | -0.421729658 | 5.33111E-17 | 5.46137E-16 |
| ZNF487    | -0.421679733 | 5.38096E-17 | 5.50961E-16 |
| FAT1      | -0.421595054 | 5.46657E-17 | 5.59438E-16 |
| DNAJC17   | 0.421470335  | 5.5951E-17  | 5.72123E-16 |
| SETD2     | -0.421469217 | 5.59626E-17 | 5.72123E-16 |
| AVPR1A    | -0.421446727 | 5.61976E-17 | 5.7423E-16  |
| BRD1      | -0.421441219 | 5.62553E-17 | 5.74525E-16 |
| ITGB1     | -0.421327697 | 5.74573E-17 | 5.865E-16   |
| IL6R      | -0.421202802 | 5.88089E-17 | 5.99989E-16 |
| LPHN2     | -0.421199464 | 5.88455E-17 | 6.00055E-16 |
| LOC728323 | -0.421044394 | 6.05682E-17 | 6.17306E-16 |
| SLC5A3    | -0.421030232 | 6.0728E-17  | 6.18618E-16 |
| RNF7      | 0.420993337  | 6.11462E-17 | 6.22559E-16 |
| NAV1      | -0.420920244 | 6.1983E-17  | 6.30757E-16 |
| SLC35B1   | 0.420908607  | 6.21173E-17 | 6.31801E-16 |
| ZNF521    | -0.420900776 | 6.22078E-17 | 6.32399E-16 |
| C16orf59  | 0.420843804  | 6.28703E-17 | 6.38807E-16 |
| THOC5     | 0.420720331  | 6.43298E-17 | 6.53303E-16 |
| MLXIP     | -0.420615929 | 6.55898E-17 | 6.6576E-16  |
| TMEM203   | 0.420477029  | 6.73039E-17 | 6.8281E-16  |
| TLR4      | -0.420423019 | 6.79821E-17 | 6.8934E-16  |
| TACC1     | -0.420366685 | 6.86968E-17 | 6.96232E-16 |
| GRWD1     | 0.420337404  | 6.90712E-17 | 6.9967E-16  |
| PPIAL4G   | 0.420225533  | 7.05199E-17 | 7.13983E-16 |
| STX5      | 0.420136654  | 7.16922E-17 | 7.25483E-16 |
| UBXN7     | -0.4201208   | 7.19033E-17 | 7.2725E-16  |
| CLIP1     | -0.42009978  | 7.21842E-17 | 7.2972E-16  |
| CCDC107   | 0.419729778  | 7.73078E-17 | 7.81118E-16 |
| SIRT1     | -0.41967091  | 7.81552E-17 | 7.89085E-16 |
| RNF8      | 0.419669513  | 7.81754E-17 | 7.89085E-16 |
| LOC92659  | 0.419626807  | 7.87961E-17 | 7.94946E-16 |
| TPD52L2   | 0.419442751  | 8.15268E-17 | 8.22079E-16 |
| NOTCH4    | -0.41943902  | 8.15831E-17 | 8.2223E-16  |

|          |              |             |             |
|----------|--------------|-------------|-------------|
| SPRY2    | -0.419434125 | 8.1657E-17  | 8.22559E-16 |
| TRAPPC6A | 0.419390118  | 8.23246E-17 | 8.28865E-16 |
| CCDC85A  | -0.419364339 | 8.27182E-17 | 8.32406E-16 |
| ZNF217   | -0.41925381  | 8.44266E-17 | 8.49169E-16 |
| EHMT1    | -0.419238829 | 8.46608E-17 | 8.51095E-16 |
| BOD1     | 0.419192085  | 8.53957E-17 | 8.5805E-16  |
| USP6NL   | -0.419186978 | 8.54764E-17 | 8.58427E-16 |
| PCDHGB5  | -0.419113104 | 8.66517E-17 | 8.69792E-16 |
| SNHG7    | 0.419079137  | 8.71974E-17 | 8.74829E-16 |
| KIF16B   | -0.418932137 | 8.95982E-17 | 8.98464E-16 |
| INHBA    | -0.418888256 | 9.03274E-17 | 9.0532E-16  |
| ARFRP1   | 0.418795684  | 9.18849E-17 | 9.20466E-16 |
| NFAT5    | -0.418527092 | 9.65545E-17 | 9.66759E-16 |
| PICALM   | -0.418439359 | 9.81297E-17 | 9.82037E-16 |
| SMAD7    | -0.418335977 | 1.00018E-16 | 1.00043E-15 |
| KLF3     | -0.418302059 | 1.00646E-16 | 1.0062E-15  |
| NRM      | 0.418220575  | 1.02169E-16 | 1.02092E-15 |
| CLIC4    | -0.418108048 | 1.04309E-16 | 1.04178E-15 |
| C14orf49 | -0.418094824 | 1.04563E-16 | 1.0438E-15  |
| ACD      | 0.418034085  | 1.0574E-16  | 1.05501E-15 |
| ZFYVE28  | -0.418028751 | 1.05844E-16 | 1.05552E-15 |
| CDCA5    | 0.417974872  | 1.06899E-16 | 1.0652E-15  |
| ZNF510   | -0.41797377  | 1.06921E-16 | 1.0652E-15  |
| LTBP1    | -0.417917571 | 1.08033E-16 | 1.07574E-15 |
| NSA2     | 0.417809686  | 1.102E-16   | 1.09677E-15 |
| ABCA1    | -0.417720264 | 1.12028E-16 | 1.11441E-15 |
| DBT      | -0.417701849 | 1.12408E-16 | 1.11763E-15 |
| PHLDB2   | -0.417674203 | 1.12981E-16 | 1.12277E-15 |
| MFSD8    | -0.417668521 | 1.131E-16   | 1.12338E-15 |
| ZDHHC16  | 0.417650131  | 1.13483E-16 | 1.12662E-15 |
| APOL6    | -0.417570822 | 1.1515E-16  | 1.14261E-15 |
| KIF13B   | -0.417382073 | 1.19216E-16 | 1.18236E-15 |
| EIF3I    | 0.417372353  | 1.19429E-16 | 1.18389E-15 |
| CKS2     | 0.417256229  | 1.22004E-16 | 1.20882E-15 |
| VHL      | -0.417226323 | 1.22676E-16 | 1.21487E-15 |
| DDX27    | 0.417139398  | 1.24651E-16 | 1.23381E-15 |
| IMP4     | 0.417129571  | 1.24876E-16 | 1.23542E-15 |
| HCG11    | -0.417060365 | 1.26473E-16 | 1.2506E-15  |
| TMEM111  | 0.417049884  | 1.26716E-16 | 1.25238E-15 |
| CDK4     | 0.416968329  | 1.28627E-16 | 1.27064E-15 |
| CLDN22   | 0.41694736   | 1.29123E-16 | 1.27491E-15 |
| GABARAP  | 0.41681464   | 1.32306E-16 | 1.30568E-15 |
| STAG3L2  | -0.416793988 | 1.32808E-16 | 1.30999E-15 |
| TANK     | -0.416787693 | 1.32961E-16 | 1.31085E-15 |
| KIAA0586 | -0.416681563 | 1.35574E-16 | 1.33596E-15 |
| NFE2L2   | -0.416635349 | 1.36728E-16 | 1.34666E-15 |

|           |              |             |             |
|-----------|--------------|-------------|-------------|
| GARNL3    | -0.416627395 | 1.36927E-16 | 1.34795E-15 |
| MPHOSPH9  | -0.416546666 | 1.38969E-16 | 1.36737E-15 |
| MED19     | 0.416437849  | 1.41767E-16 | 1.39422E-15 |
| GPX4      | 0.41635202   | 1.44014E-16 | 1.41561E-15 |
| PRCC      | 0.416339098  | 1.44355E-16 | 1.41827E-15 |
| ATP6V0E1  | 0.416335562  | 1.44448E-16 | 1.41849E-15 |
| TNFRSF10A | -0.416280118 | 1.45922E-16 | 1.43225E-15 |
| CMIP      | -0.416250756 | 1.46709E-16 | 1.43927E-15 |
| TBCB      | 0.416195009  | 1.48214E-16 | 1.45331E-15 |
| LRP6      | -0.416144444 | 1.49592E-16 | 1.4661E-15  |
| FYTTD1    | -0.416025327 | 1.52888E-16 | 1.49767E-15 |
| OAZ1      | 0.415934968  | 1.55436E-16 | 1.52188E-15 |
| DCUN1D3   | -0.415905664 | 1.56271E-16 | 1.52931E-15 |
| GET4      | 0.415898351  | 1.56481E-16 | 1.5306E-15  |
| LOC100129 | -0.415805445 | 1.59161E-16 | 1.55606E-15 |
| NUPL1     | -0.415770116 | 1.60193E-16 | 1.56538E-15 |
| TRAF4     | 0.41571326   | 1.61866E-16 | 1.58095E-15 |
| UFD1L     | 0.415655735  | 1.63576E-16 | 1.59687E-15 |
| UQCRHL    | 0.415620058  | 1.64646E-16 | 1.60653E-15 |
| SH3D19    | -0.415589013 | 1.65583E-16 | 1.61488E-15 |
| FAM165B   | 0.415582591  | 1.65777E-16 | 1.61598E-15 |
| KIAA1958  | -0.415542104 | 1.67008E-16 | 1.62718E-15 |
| KLHL2     | -0.415517675 | 1.67754E-16 | 1.63366E-15 |
| BARD1     | -0.415362635 | 1.72571E-16 | 1.67974E-15 |
| ANAPC7    | 0.415340866  | 1.73258E-16 | 1.68496E-15 |
| SPC25     | 0.415340292  | 1.73276E-16 | 1.68496E-15 |
| MXRA5     | -0.415330856 | 1.73575E-16 | 1.68704E-15 |
| ZCCHC14   | -0.415289754 | 1.74882E-16 | 1.69891E-15 |
| SENP6     | -0.415257805 | 1.75905E-16 | 1.70801E-15 |
| LOC440356 | 0.415182731  | 1.78331E-16 | 1.73073E-15 |
| MRPS33    | 0.415160136  | 1.79067E-16 | 1.73703E-15 |
| C1orf57   | 0.415150705  | 1.79375E-16 | 1.73917E-15 |
| TXNDC17   | 0.415142551  | 1.79642E-16 | 1.74091E-15 |
| P2RY12    | -0.415115962 | 1.80516E-16 | 1.74853E-15 |
| PRICKLE4  | -0.415061124 | 1.8233E-16  | 1.76524E-15 |
| RAPGEF1   | -0.414978993 | 1.85081E-16 | 1.79101E-15 |
| HPS5      | -0.414971962 | 1.85319E-16 | 1.79243E-15 |
| IMPACT    | -0.414968126 | 1.85448E-16 | 1.79282E-15 |
| ITGA8     | -0.414925328 | 1.86901E-16 | 1.80549E-15 |
| GMNN      | 0.41492417   | 1.8694E-16  | 1.80549E-15 |
| BBS10     | -0.414858495 | 1.89191E-16 | 1.82634E-15 |
| FAM38B    | -0.414792654 | 1.91474E-16 | 1.84749E-15 |
| PLEKHJ1   | 0.414785333  | 1.9173E-16  | 1.84906E-15 |
| LOC202181 | -0.414565382 | 1.99566E-16 | 1.9237E-15  |
| MFSD9     | -0.414552587 | 2.00032E-16 | 1.92721E-15 |
| RASEF     | -0.414550038 | 2.00124E-16 | 1.92721E-15 |

|          |              |             |             |
|----------|--------------|-------------|-------------|
| PACSIN2  | -0.414492943 | 2.02215E-16 | 1.94641E-15 |
| KANK2    | -0.414379954 | 2.06416E-16 | 1.98588E-15 |
| C1orf123 | 0.414362026  | 2.0709E-16  | 1.99141E-15 |
| ZNF91    | -0.414082331 | 2.17896E-16 | 2.0943E-15  |
| 44081    | -0.414001275 | 2.21129E-16 | 2.12436E-15 |
| ZNF562   | -0.413988692 | 2.21636E-16 | 2.12753E-15 |
| FKBP8    | 0.413987758  | 2.21673E-16 | 2.12753E-15 |
| ZFR      | -0.41397886  | 2.22032E-16 | 2.12994E-15 |
| FRMD6    | -0.413971241 | 2.22339E-16 | 2.13187E-15 |
| TTC7B    | -0.41392044  | 2.24401E-16 | 2.1506E-15  |
| DNAJC22  | -0.413906663 | 2.24963E-16 | 2.15495E-15 |
| PWP1     | 0.413883308  | 2.2592E-16  | 2.16307E-15 |
| SYNC     | 0.413856005  | 2.27043E-16 | 2.17278E-15 |
| SLC30A1  | -0.413837855 | 2.27793E-16 | 2.17891E-15 |
| GGCT     | 0.413832057  | 2.28032E-16 | 2.18016E-15 |
| NUDT3    | 0.413804611  | 2.29172E-16 | 2.19E-15    |
| FBXW11   | -0.413765343 | 2.30812E-16 | 2.20461E-15 |
| VPS13A   | -0.413760323 | 2.31022E-16 | 2.20557E-15 |
| C12orf66 | -0.413756066 | 2.31201E-16 | 2.20621E-15 |
| H2AFZ    | 0.41368061   | 2.3439E-16  | 2.23557E-15 |
| DDX54    | 0.413661882  | 2.35188E-16 | 2.24211E-15 |
| MPHOSPH8 | -0.413639164 | 2.3616E-16  | 2.25029E-15 |
| GVIN1    | -0.413636546 | 2.36272E-16 | 2.25029E-15 |
| PTTG3P   | 0.413614814  | 2.37206E-16 | 2.2581E-15  |
| CDK13    | -0.413529587 | 2.40902E-16 | 2.2922E-15  |
| DKK2     | -0.413514738 | 2.41552E-16 | 2.29728E-15 |
| MTMR12   | -0.413484853 | 2.42865E-16 | 2.30867E-15 |
| RFC4     | 0.413415697  | 2.45931E-16 | 2.3367E-15  |
| SRP14    | 0.413382255  | 2.47427E-16 | 2.34979E-15 |
| FAM136A  | 0.413347328  | 2.48999E-16 | 2.36359E-15 |
| HEATR3   | -0.413288233 | 2.51681E-16 | 2.38791E-15 |
| EYA3     | -0.412918362 | 2.69124E-16 | 2.55219E-15 |
| KIF9     | 0.412819244  | 2.73996E-16 | 2.59716E-15 |
| COL12A1  | -0.412796953 | 2.75104E-16 | 2.60642E-15 |
| PPIE     | 0.412770427  | 2.76427E-16 | 2.61771E-15 |
| LRRC8A   | -0.412730847 | 2.78414E-16 | 2.63498E-15 |
| IL1RL1   | -0.412728839 | 2.78516E-16 | 2.63498E-15 |
| RBM9     | -0.41249615  | 2.90487E-16 | 2.74694E-15 |
| IPPK     | -0.412457586 | 2.9252E-16  | 2.76485E-15 |
| TAF2     | -0.412430364 | 2.93963E-16 | 2.77717E-15 |
| PPP2R5D  | 0.41239564   | 2.95814E-16 | 2.79333E-15 |
| CSNK2A1P | -0.412314969 | 3.00158E-16 | 2.83301E-15 |
| NFKBIE   | 0.412309762  | 3.0044E-16  | 2.83433E-15 |
| EDEM1    | -0.412268457 | 3.02691E-16 | 2.85421E-15 |
| SEC23IP  | -0.412243422 | 3.04063E-16 | 2.86579E-15 |
| FLJ10213 | -0.412221862 | 3.05249E-16 | 2.87561E-15 |

|           |              |             |             |
|-----------|--------------|-------------|-------------|
| YDJC      | 0.412184818  | 3.07299E-16 | 2.89355E-15 |
| LOC283856 | -0.41201961  | 3.16604E-16 | 2.97975E-15 |
| SYNPO2    | -0.411964255 | 3.19783E-16 | 3.00825E-15 |
| CTBS      | -0.41195276  | 3.20447E-16 | 3.01308E-15 |
| PTGES3    | 0.41182845   | 3.27716E-16 | 3.07997E-15 |
| FARS2     | 0.41170796   | 3.34915E-16 | 3.14615E-15 |
| COX18     | -0.411682023 | 3.36485E-16 | 3.15941E-15 |
| TAL1      | -0.411657647 | 3.37967E-16 | 3.17183E-15 |
| B3GNTL1   | 0.41164142   | 3.38958E-16 | 3.17962E-15 |
| FAM13B    | -0.411616811 | 3.40465E-16 | 3.19226E-15 |
| PXDN      | -0.411491928 | 3.48215E-16 | 3.26226E-15 |
| DOCK4     | -0.411491226 | 3.48259E-16 | 3.26226E-15 |
| MCCC2     | -0.411483639 | 3.48735E-16 | 3.26519E-15 |
| GTF3C6    | 0.411474993  | 3.49279E-16 | 3.26875E-15 |
| FAM65C    | -0.411385766 | 3.54939E-16 | 3.32015E-15 |
| NDEL1     | -0.411365104 | 3.56262E-16 | 3.33097E-15 |
| GAPDH     | 0.411274146  | 3.62146E-16 | 3.38439E-15 |
| NAT14     | 0.411257588  | 3.63227E-16 | 3.39291E-15 |
| CCDC39    | -0.411204173 | 3.66737E-16 | 3.42409E-15 |
| COX5A     | 0.411192162  | 3.67531E-16 | 3.42989E-15 |
| SNHG8     | 0.411170165  | 3.68989E-16 | 3.44188E-15 |
| MAPK1     | -0.411161534 | 3.69563E-16 | 3.44562E-15 |
| COL25A1   | -0.41114945  | 3.70368E-16 | 3.45151E-15 |
| RSRC1     | -0.41103842  | 3.77842E-16 | 3.51952E-15 |
| GDF7      | -0.411019311 | 3.79143E-16 | 3.52999E-15 |
| CYP2U1    | -0.410805159 | 3.94031E-16 | 3.66688E-15 |
| STX4      | 0.410723695  | 3.99843E-16 | 3.71923E-15 |
| SLC25A26  | 0.410711554  | 4.00717E-16 | 3.72562E-15 |
| ZNFX1     | -0.410585677 | 4.09883E-16 | 3.80906E-15 |
| CFDP1     | 0.410492599  | 4.16794E-16 | 3.87108E-15 |
| ATP6V0B   | 0.410490567  | 4.16946E-16 | 3.87108E-15 |
| HLCS      | -0.410448632 | 4.20098E-16 | 3.89853E-15 |
| RBCK1     | 0.410444955  | 4.20375E-16 | 3.89929E-15 |
| KIF2C     | 0.410259004  | 4.34644E-16 | 4.02976E-15 |
| CIDECP    | 0.410245131  | 4.35727E-16 | 4.03793E-15 |
| PAFAH1B3  | 0.410190239  | 4.4004E-16  | 4.076E-15   |
| CCNB1     | 0.410117614  | 4.4581E-16  | 4.12651E-15 |
| ZNF90     | 0.410116398  | 4.45907E-16 | 4.12651E-15 |
| UTP18     | 0.4100974    | 4.47429E-16 | 4.13867E-15 |
| UCK2      | 0.410058125  | 4.50592E-16 | 4.16599E-15 |
| FAM100B   | 0.409853376  | 4.67438E-16 | 4.31974E-15 |
| TPRA1     | 0.409777543  | 4.73833E-16 | 4.37681E-15 |
| ZNF224    | -0.409662681 | 4.83684E-16 | 4.46572E-15 |
| XAB2      | 0.409629225  | 4.8659E-16  | 4.49047E-15 |
| MLL       | -0.409486884 | 4.99149E-16 | 4.60424E-15 |
| SSU72     | 0.409468668  | 5.0078E-16  | 4.61714E-15 |

|           |              |             |             |
|-----------|--------------|-------------|-------------|
| USP16     | -0.409352124 | 5.11333E-16 | 4.71226E-15 |
| TPRN      | 0.409331386  | 5.13233E-16 | 4.72759E-15 |
| SFRS3     | 0.409323057  | 5.13999E-16 | 4.73245E-15 |
| HMGXB4    | -0.409266077 | 5.19264E-16 | 4.77872E-15 |
| ZP3       | 0.409133374  | 5.31733E-16 | 4.89121E-15 |
| LOC729991 | 0.409118736  | 5.33127E-16 | 4.90176E-15 |
| ARFGAP2   | 0.409094473  | 5.35444E-16 | 4.9208E-15  |
| ABHD14A   | 0.409075779  | 5.37236E-16 | 4.93499E-15 |
| ABL1      | -0.409063365 | 5.3843E-16  | 4.94367E-15 |
| USP8      | -0.409004654 | 5.44109E-16 | 4.99352E-15 |
| LEMD3     | -0.408962341 | 5.48238E-16 | 5.0291E-15  |
| NPFF      | 0.408811534  | 5.63208E-16 | 5.16403E-15 |
| YIF1A     | 0.408772667  | 5.6713E-16  | 5.19761E-15 |
| SYTL2     | -0.408768411 | 5.67561E-16 | 5.19917E-15 |
| NTHL1     | 0.408758693  | 5.68547E-16 | 5.2058E-15  |
| UACA      | -0.408578758 | 5.87104E-16 | 5.37324E-15 |
| ERCC6     | -0.40856399  | 5.88653E-16 | 5.38495E-15 |
| DLG1      | -0.408556674 | 5.89422E-16 | 5.38951E-15 |
| TMEM192   | -0.408549327 | 5.90196E-16 | 5.3941E-15  |
| MBLAC2    | -0.408394595 | 6.06712E-16 | 5.54251E-15 |
| PSMG1     | 0.408352273  | 6.11309E-16 | 5.58194E-15 |
| GIMAP6    | -0.408321195 | 6.14705E-16 | 5.61038E-15 |
| MBNL2     | -0.40824774  | 6.22808E-16 | 5.68079E-15 |
| ZNF37A    | -0.408246097 | 6.2299E-16  | 5.68079E-15 |
| ZMAT1     | -0.408166429 | 6.31899E-16 | 5.75838E-15 |
| TMEM42    | 0.40816484   | 6.32078E-16 | 5.75838E-15 |
| TTC39B    | -0.408106864 | 6.38641E-16 | 5.81479E-15 |
| MAMDC2    | -0.408105002 | 6.38853E-16 | 5.81479E-15 |
| FBXO8     | -0.408059432 | 6.4406E-16  | 5.85951E-15 |
| KIAA1671  | -0.408052346 | 6.44874E-16 | 5.86423E-15 |
| MAP2K2    | 0.407991194  | 6.51936E-16 | 5.92574E-15 |
| ZCCHC2    | -0.407982859 | 6.52905E-16 | 5.93184E-15 |
| ZNF76     | 0.407865674  | 6.66671E-16 | 6.05415E-15 |
| UBE2I     | 0.407861693  | 6.67143E-16 | 6.05568E-15 |
| MRP63     | 0.407764469  | 6.78788E-16 | 6.15669E-15 |
| HGS       | 0.40776363   | 6.7889E-16  | 6.15669E-15 |
| UTP6      | 0.407752303  | 6.80259E-16 | 6.1663E-15  |
| MAGOHB    | 0.407581634  | 7.0123E-16  | 6.3535E-15  |
| CYSLTR1   | -0.407544782 | 7.05841E-16 | 6.39237E-15 |
| TMEM179B  | 0.40750146   | 7.11299E-16 | 6.43887E-15 |
| BAX       | 0.407399112  | 7.24359E-16 | 6.55412E-15 |
| TMX3      | -0.407361149 | 7.29263E-16 | 6.59549E-15 |
| DHFRL1    | -0.407358388 | 7.29621E-16 | 6.59573E-15 |
| RARS      | 0.407251539  | 7.43605E-16 | 6.7191E-15  |
| ABHD12    | 0.407198998  | 7.50578E-16 | 6.77903E-15 |
| FBXO21    | -0.40710517  | 7.6319E-16  | 6.88981E-15 |



|           |              |             |             |
|-----------|--------------|-------------|-------------|
| NECAP1    | -0.407079104 | 7.6673E-16  | 6.91864E-15 |
| BRMS1L    | -0.407073351 | 7.67514E-16 | 6.92257E-15 |
| TMEM219   | 0.406969376  | 7.81811E-16 | 7.04834E-15 |
| LAS1L     | 0.406903241  | 7.91041E-16 | 7.12832E-15 |
| ZC3H7A    | -0.406900312 | 7.91453E-16 | 7.1288E-15  |
| ERCC1     | 0.406888801  | 7.93071E-16 | 7.14015E-15 |
| FAM24B    | 0.406784667  | 8.07858E-16 | 7.26999E-15 |
| STXBP3    | -0.406777142 | 8.08937E-16 | 7.27641E-15 |
| ZSCAN29   | -0.406736801 | 8.14745E-16 | 7.32535E-15 |
| NOP58     | 0.406688351  | 8.21776E-16 | 7.38523E-15 |
| UROD      | 0.406606999  | 8.33714E-16 | 7.48914E-15 |
| FCHSD2    | -0.406602732 | 8.34345E-16 | 7.49142E-15 |
| ABCC9     | -0.406549896 | 8.42195E-16 | 7.5585E-15  |
| RDM1      | 0.40654385   | 8.43098E-16 | 7.5632E-15  |
| KLHL9     | -0.406424628 | 8.61099E-16 | 7.7212E-15  |
| C20orf24  | 0.406390699  | 8.6629E-16  | 7.76266E-15 |
| ALDH1A3   | -0.406389314 | 8.66502E-16 | 7.76266E-15 |
| PLXNC1    | -0.406272225 | 8.84659E-16 | 7.92175E-15 |
| C12orf44  | 0.406145251  | 9.04769E-16 | 8.09819E-15 |
| LOC728989 | -0.406084638 | 9.14527E-16 | 8.18185E-15 |
| C8orf30A  | 0.406071572  | 9.16644E-16 | 8.19711E-15 |
| BNIP2     | -0.406040447 | 9.21706E-16 | 8.23868E-15 |
| CCR4      | -0.405986768 | 9.30501E-16 | 8.31356E-15 |
| LMAN1     | -0.405918092 | 9.41873E-16 | 8.41139E-15 |
| CFL1      | 0.405848067  | 9.53609E-16 | 8.51238E-15 |
| PVRL3     | -0.405832658 | 9.5621E-16  | 8.53178E-15 |
| RUVBL1    | 0.405789219  | 9.63582E-16 | 8.5937E-15  |
| IKZF4     | -0.405742525 | 9.71568E-16 | 8.66105E-15 |
| RBM25     | -0.405717076 | 9.75948E-16 | 8.6962E-15  |
| SRA1      | 0.405547294  | 1.00567E-15 | 8.95702E-15 |
| C1orf55   | -0.405506419 | 1.01296E-15 | 9.01789E-15 |
| LOC100132 | -0.405459761 | 1.02134E-15 | 9.08844E-15 |
| KDM6A     | -0.405337772 | 1.04357E-15 | 9.28215E-15 |
| ANKRD56   | -0.40529755  | 1.05101E-15 | 9.34259E-15 |
| CYP4V2    | -0.405295941 | 1.05131E-15 | 9.34259E-15 |
| ACADM     | -0.405079588 | 1.09221E-15 | 9.70176E-15 |
| LARP7     | -0.404919866 | 1.1234E-15  | 9.97441E-15 |
| UBE2D2    | 0.404758736  | 1.15576E-15 | 1.02571E-14 |
| ZNF460    | -0.404708374 | 1.16606E-15 | 1.03439E-14 |
| ZNF828    | -0.404667494 | 1.17448E-15 | 1.0414E-14  |
| BCO2      | -0.404643614 | 1.17943E-15 | 1.04532E-14 |
| C16orf53  | 0.404531727  | 1.2029E-15  | 1.06565E-14 |
| NDUFB8    | 0.404431492  | 1.22431E-15 | 1.08398E-14 |
| NPM1      | 0.404429772  | 1.22468E-15 | 1.08398E-14 |
| HDGF      | 0.404414013  | 1.22808E-15 | 1.08651E-14 |
| AIP       | 0.404387925  | 1.23373E-15 | 1.09102E-14 |

|           |              |             |             |
|-----------|--------------|-------------|-------------|
| ALDH1L2   | -0.40437579  | 1.23637E-15 | 1.09287E-14 |
| C7orf27   | 0.404351125  | 1.24175E-15 | 1.09713E-14 |
| PDCL3     | 0.404260765  | 1.26164E-15 | 1.11422E-14 |
| KDM4A     | -0.40419681  | 1.27591E-15 | 1.12632E-14 |
| AP4E1     | -0.404142011 | 1.28826E-15 | 1.13672E-14 |
| NCRNA0018 | 0.404066101  | 1.30557E-15 | 1.15148E-14 |
| UHRF1BP1L | -0.404045535 | 1.3103E-15  | 1.15514E-14 |
| TNFSF14   | -0.404032999 | 1.31319E-15 | 1.15717E-14 |
| PEX16     | 0.403934792  | 1.33604E-15 | 1.17679E-14 |
| ADNP      | -0.403915926 | 1.34048E-15 | 1.18018E-14 |
| WNK1      | -0.403871899 | 1.35089E-15 | 1.18881E-14 |
| MYO1B     | -0.403812547 | 1.36504E-15 | 1.20074E-14 |
| STAG2     | -0.403774983 | 1.37407E-15 | 1.20815E-14 |
| RNF38     | -0.403744927 | 1.38134E-15 | 1.21401E-14 |
| C5orf42   | -0.403664535 | 1.40098E-15 | 1.23072E-14 |
| C2orf68   | 0.403640923  | 1.4068E-15  | 1.23529E-14 |
| SLC1A1    | -0.403517693 | 1.43755E-15 | 1.26173E-14 |
| FBXO38    | -0.403496076 | 1.44301E-15 | 1.26597E-14 |
| RUNDC2C   | -0.403430701 | 1.45965E-15 | 1.28001E-14 |
| ENPEP     | -0.403408425 | 1.46536E-15 | 1.28445E-14 |
| CEMP1     | 0.403355067  | 1.47914E-15 | 1.29596E-14 |
| FILIP1    | -0.403063095 | 1.5568E-15  | 1.36328E-14 |
| UBE2C     | 0.403061059  | 1.55735E-15 | 1.36328E-14 |
| TBC1D5    | -0.402948381 | 1.58839E-15 | 1.38984E-14 |
| NAIP      | -0.402751301 | 1.64414E-15 | 1.43799E-14 |
| PAPD4     | -0.402737852 | 1.64802E-15 | 1.44075E-14 |
| DMXL2     | -0.402725022 | 1.65172E-15 | 1.44335E-14 |
| RSL1D1    | 0.402668612  | 1.6681E-15  | 1.45703E-14 |
| STX8      | 0.402660612  | 1.67044E-15 | 1.45843E-14 |
| ZNF12     | -0.402611946 | 1.68472E-15 | 1.47025E-14 |
| ZNF644    | -0.402557911 | 1.70071E-15 | 1.48356E-14 |
| BRWD1     | -0.402440747 | 1.73591E-15 | 1.5136E-14  |
| FBXL14    | -0.40238635  | 1.7525E-15  | 1.52739E-14 |
| CHRAC1    | 0.402346474  | 1.76475E-15 | 1.5374E-14  |
| INO80D    | -0.402232216 | 1.80033E-15 | 1.56771E-14 |
| FAM188A   | -0.402109571 | 1.83931E-15 | 1.60096E-14 |
| INPP4A    | -0.402044992 | 1.86017E-15 | 1.6184E-14  |
| CXorf38   | -0.401963296 | 1.88688E-15 | 1.64093E-14 |
| RAD51C    | 0.401955184  | 1.88956E-15 | 1.64254E-14 |
| NUDT2     | 0.401898398  | 1.90837E-15 | 1.65817E-14 |
| NUMA1     | -0.401868621 | 1.91831E-15 | 1.66608E-14 |
| HS3ST3A1  | -0.401863875 | 1.9199E-15  | 1.66673E-14 |
| MCM7      | 0.401834824  | 1.92966E-15 | 1.67407E-14 |
| CAB39     | -0.40183369  | 1.93004E-15 | 1.67407E-14 |
| BRIX1     | 0.401550345  | 2.02779E-15 | 1.75809E-14 |
| NGDN      | 0.401482537  | 2.05189E-15 | 1.77821E-14 |

|           |              |             |             |
|-----------|--------------|-------------|-------------|
| BBX       | -0.401413363 | 2.07677E-15 | 1.79899E-14 |
| TRAPPC3   | 0.40132386   | 2.1094E-15  | 1.82646E-14 |
| ZC3H12C   | -0.401155009 | 2.17232E-15 | 1.88013E-14 |
| FTO       | -0.40110941  | 2.18963E-15 | 1.89429E-14 |
| ZNF621    | -0.401103604 | 2.19185E-15 | 1.89538E-14 |
| RPL23AP53 | -0.401090456 | 2.19687E-15 | 1.8989E-14  |
| KIAA0430  | -0.401072734 | 2.20365E-15 | 1.90394E-14 |
| RPL22L1   | 0.401031979  | 2.21933E-15 | 1.91665E-14 |
| ZBTB39    | -0.401013602 | 2.22644E-15 | 1.92196E-14 |
| ESR1      | -0.400981643 | 2.23885E-15 | 1.93183E-14 |
| DKFZp686O | -0.400959861 | 2.24735E-15 | 1.93833E-14 |
| CXorf56   | -0.40091561  | 2.26471E-15 | 1.95246E-14 |
| TXNIP     | -0.400813065 | 2.30546E-15 | 1.98672E-14 |
| GPR173    | -0.400782045 | 2.31792E-15 | 1.9966E-14  |
| SH3RF1    | -0.400766773 | 2.32408E-15 | 2.00104E-14 |
| FAM21A    | -0.400718573 | 2.34363E-15 | 2.017E-14   |
| TMSB10    | 0.400695528  | 2.35304E-15 | 2.02342E-14 |
| MMAB      | 0.400695337  | 2.35312E-15 | 2.02342E-14 |
| FARP2     | -0.400598857 | 2.3929E-15  | 2.05673E-14 |
| SNHG5     | 0.400584497  | 2.39887E-15 | 2.06098E-14 |
| TRAPPC1   | 0.400566735  | 2.40628E-15 | 2.06646E-14 |
| ADCK5     | 0.400551216  | 2.41278E-15 | 2.07114E-14 |
| FTSJ3     | 0.400536051  | 2.41914E-15 | 2.07571E-14 |
| MCC       | -0.400468681 | 2.44761E-15 | 2.09923E-14 |
| TMEM204   | -0.400449255 | 2.45588E-15 | 2.10542E-14 |
| NAGPA     | 0.400438713  | 2.46038E-15 | 2.10837E-14 |
| ZMYND17   | 0.400370868  | 2.48953E-15 | 2.13243E-14 |
| MGC70857  | 0.400348658  | 2.49915E-15 | 2.13975E-14 |
| UBE2V1    | 0.400341117  | 2.50242E-15 | 2.14163E-14 |
| MBLAC1    | 0.400302083  | 2.51943E-15 | 2.15526E-14 |
| B3GAT3    | 0.400291993  | 2.52385E-15 | 2.15811E-14 |
| MAN1B1    | 0.400161821  | 2.5815E-15  | 2.20646E-14 |
| ZDHHC17   | -0.400139168 | 2.59166E-15 | 2.2142E-14  |
| STUB1     | 0.400129262  | 2.59612E-15 | 2.21706E-14 |
| WDR37     | -0.400102718 | 2.6081E-15  | 2.22633E-14 |
| ZBTB26    | -0.40002664  | 2.64274E-15 | 2.25493E-14 |
| FRG1      | 0.400011742  | 2.64957E-15 | 2.2598E-14  |
| FLT4      | -0.399906422 | 2.69839E-15 | 2.30045E-14 |
| DNAJB11   | 0.399885463  | 2.70821E-15 | 2.30719E-14 |
| MYOCD     | -0.399884605 | 2.70861E-15 | 2.30719E-14 |
| TNKS      | -0.399726246 | 2.78396E-15 | 2.37035E-14 |
| LOC388955 | 0.399509035  | 2.89065E-15 | 2.46014E-14 |
| ZNHIT1    | 0.399498854  | 2.89575E-15 | 2.46343E-14 |
| ARFIP2    | 0.399485833  | 2.90228E-15 | 2.46793E-14 |
| COL4A1    | -0.399450128 | 2.92027E-15 | 2.48217E-14 |
| BRD3      | -0.399319624 | 2.98696E-15 | 2.53777E-14 |

|           |              |             |             |
|-----------|--------------|-------------|-------------|
| HERC4     | -0.399236995 | 3.02995E-15 | 2.5732E-14  |
| LOC728024 | -0.39922107  | 3.03831E-15 | 2.57919E-14 |
| TWSG1     | -0.399210918 | 3.04365E-15 | 2.58262E-14 |
| EIF4EBP3  | 0.399182104  | 3.05885E-15 | 2.59442E-14 |
| CCDC146   | -0.399172559 | 3.0639E-15  | 2.5976E-14  |
| EEA1      | -0.399124652 | 3.08938E-15 | 2.61808E-14 |
| PQLC2     | 0.399111201  | 3.09657E-15 | 2.62306E-14 |
| RAC1      | 0.399087803  | 3.10912E-15 | 2.63257E-14 |
| TMED7     | -0.39908157  | 3.11247E-15 | 2.63429E-14 |
| C1orf152  | -0.399072557 | 3.11732E-15 | 2.63728E-14 |
| DLC1      | -0.398909574 | 3.20636E-15 | 2.71071E-14 |
| PRKCH     | -0.398908691 | 3.20685E-15 | 2.71071E-14 |
| MIER3     | -0.398888535 | 3.21803E-15 | 2.71901E-14 |
| LOC729603 | -0.398799594 | 3.26784E-15 | 2.75992E-14 |
| C21orf57  | 0.398619972  | 3.37075E-15 | 2.84563E-14 |
| OVCA2     | 0.398498142  | 3.44235E-15 | 2.90485E-14 |
| RAG1AP1   | 0.398482736  | 3.45151E-15 | 2.91134E-14 |
| SNRNP25   | 0.398475097  | 3.45606E-15 | 2.91395E-14 |
| LDLR      | -0.398432179 | 3.48174E-15 | 2.93436E-14 |
| VPS36     | -0.398405961 | 3.49752E-15 | 2.94641E-14 |
| DDX60     | -0.398351349 | 3.53061E-15 | 2.97302E-14 |
| ZMYM2     | -0.398308278 | 3.55692E-15 | 2.99392E-14 |
| DDX51     | 0.398249142  | 3.59336E-15 | 3.02331E-14 |
| KRT10     | 0.398226204  | 3.60759E-15 | 3.034E-14   |
| SNORA76   | 0.398223116  | 3.60951E-15 | 3.03434E-14 |
| TTC17     | -0.398204887 | 3.62087E-15 | 3.0426E-14  |
| CHCHD6    | 0.39812456   | 3.67133E-15 | 3.0837E-14  |
| PCDHB18   | -0.398097087 | 3.68875E-15 | 3.09703E-14 |
| EPM2AIP1  | -0.398084623 | 3.69668E-15 | 3.10238E-14 |
| PCDHGB6   | -0.398021777 | 3.73691E-15 | 3.13482E-14 |
| EGFL8     | 0.398015495  | 3.74096E-15 | 3.13689E-14 |
| AK3       | -0.3979897   | 3.75761E-15 | 3.14953E-14 |
| PRKAA1    | -0.397970742 | 3.7699E-15  | 3.1585E-14  |
| WDR82     | -0.397956161 | 3.77937E-15 | 3.16511E-14 |
| TADA2B    | -0.397950685 | 3.78294E-15 | 3.16676E-14 |
| TBC1D12   | -0.397748346 | 3.91701E-15 | 3.27761E-14 |
| KDM5A     | -0.397711538 | 3.94189E-15 | 3.29705E-14 |
| IL18R1    | -0.397655215 | 3.98027E-15 | 3.32775E-14 |
| PCDHB15   | -0.397624529 | 4.00133E-15 | 3.34396E-14 |
| EDNRB     | -0.397418442 | 4.14565E-15 | 3.46311E-14 |
| AASDH     | -0.397415013 | 4.14809E-15 | 3.4637E-14  |
| NNT       | -0.397391603 | 4.16481E-15 | 3.47621E-14 |
| KDELC2    | -0.397308761 | 4.22452E-15 | 3.52456E-14 |
| STK25     | 0.397201962  | 4.30274E-15 | 3.58832E-14 |
| FLT1      | -0.397187815 | 4.3132E-15  | 3.59554E-14 |
| CLPX      | -0.397135389 | 4.35221E-15 | 3.62654E-14 |

|           |              |             |             |
|-----------|--------------|-------------|-------------|
| KIAA0182  | -0.396821187 | 4.59333E-15 | 3.82585E-14 |
| PARD3B    | -0.396651734 | 4.72875E-15 | 3.937E-14   |
| AIFM2     | 0.39661858   | 4.7557E-15  | 3.95778E-14 |
| NAA30     | -0.396593828 | 4.77592E-15 | 3.97295E-14 |
| LOC653501 | -0.396580959 | 4.78646E-15 | 3.97988E-14 |
| SDF2L1    | 0.396577385  | 4.7894E-15  | 3.97988E-14 |
| CD82      | -0.396576357 | 4.79024E-15 | 3.97988E-14 |
| COL15A1   | -0.396566536 | 4.79831E-15 | 3.98492E-14 |
| LOC100170 | -0.396553533 | 4.80901E-15 | 3.99214E-14 |
| ZC3HC1    | 0.396475546  | 4.87371E-15 | 4.04416E-14 |
| REV1      | -0.396419359 | 4.92084E-15 | 4.08157E-14 |
| PIK3CG    | -0.396405661 | 4.9324E-15  | 4.08946E-14 |
| NDUFA1    | 0.396390463  | 4.94526E-15 | 4.09841E-14 |
| GNA14     | -0.39633157  | 4.99539E-15 | 4.13823E-14 |
| BTBD7     | -0.396278675 | 5.04083E-15 | 4.17415E-14 |
| ZNF710    | -0.396143929 | 5.15845E-15 | 4.26976E-14 |
| HES6      | 0.39613916   | 5.16266E-15 | 4.27147E-14 |
| SERGEF    | 0.396126361  | 5.17398E-15 | 4.27906E-14 |
| CMTM6     | -0.396075012 | 5.21964E-15 | 4.31433E-14 |
| AZI1      | 0.396073534  | 5.22096E-15 | 4.31433E-14 |
| RPL7      | 0.396039398  | 5.25154E-15 | 4.3378E-14  |
| PTK2B     | -0.396028709 | 5.26115E-15 | 4.34394E-14 |
| TACC3     | 0.395846781  | 5.4274E-15  | 4.47935E-14 |
| PCDHGA4   | -0.395652826 | 5.61032E-15 | 4.6284E-14  |
| NR3C2     | -0.395643043 | 5.61971E-15 | 4.63422E-14 |
| CENPH     | 0.395607662  | 5.65377E-15 | 4.66039E-14 |
| LRRK2     | -0.395476482 | 5.78187E-15 | 4.764E-14   |
| C16orf91  | 0.395459854  | 5.7983E-15  | 4.77557E-14 |
| UQCRQ     | 0.395425282  | 5.83263E-15 | 4.80185E-14 |
| TROAP     | 0.395346454  | 5.91164E-15 | 4.86489E-14 |
| GON4L     | -0.395338176 | 5.92E-15    | 4.86975E-14 |
| MGC72080  | 0.39514612   | 6.11718E-15 | 5.02988E-14 |
| LOC144438 | -0.395113084 | 6.15175E-15 | 5.05621E-14 |
| WDR34     | 0.395025258  | 6.24456E-15 | 5.13038E-14 |
| PDE7B     | -0.394988596 | 6.28371E-15 | 5.16042E-14 |
| EPS8      | -0.394805167 | 6.48323E-15 | 5.32207E-14 |
| MESP1     | 0.394796558  | 6.49274E-15 | 5.32769E-14 |
| USP15     | -0.394793822 | 6.49577E-15 | 5.32798E-14 |
| XYLT1     | -0.394775656 | 6.5159E-15  | 5.34229E-14 |
| SUCLA2    | -0.394561044 | 6.75842E-15 | 5.53885E-14 |
| ONECUT1   | -0.394356017 | 6.99836E-15 | 5.73313E-14 |
| FAM18B    | -0.394133799 | 7.26785E-15 | 5.95145E-14 |
| RBM16     | -0.394112314 | 7.29444E-15 | 5.97076E-14 |
| LOC641298 | -0.394037935 | 7.38722E-15 | 6.04423E-14 |
| MDK       | 0.394002292  | 7.43209E-15 | 6.07844E-14 |
| FIS1      | 0.393964213  | 7.48033E-15 | 6.11538E-14 |

|           |              |             |             |
|-----------|--------------|-------------|-------------|
| TMEM170A  | -0.393798752 | 7.6935E-15  | 6.28707E-14 |
| PFN1      | 0.39370369   | 7.81865E-15 | 6.38673E-14 |
| GLTSCR2   | 0.393694155  | 7.83132E-15 | 6.39445E-14 |
| POLR1D    | 0.393671558  | 7.86141E-15 | 6.41639E-14 |
| GTF3C4    | -0.393665585 | 7.86938E-15 | 6.42026E-14 |
| RPL23AP64 | -0.393646906 | 7.89436E-15 | 6.43801E-14 |
| ZNF326    | -0.393618231 | 7.93287E-15 | 6.46676E-14 |
| EGLN2     | 0.393602404  | 7.9542E-15  | 6.4815E-14  |
| COL4A4    | -0.393563058 | 8.00747E-15 | 6.52224E-14 |
| FAM160B1  | -0.393540965 | 8.03754E-15 | 6.54405E-14 |
| LOC401052 | 0.393517232  | 8.06996E-15 | 6.56777E-14 |
| GTF2H3    | -0.393480016 | 8.12106E-15 | 6.60665E-14 |
| C6orf72   | -0.39341273  | 8.21425E-15 | 6.67974E-14 |
| POLE4     | 0.393400747  | 8.23095E-15 | 6.69059E-14 |
| HELB      | -0.393387344 | 8.24968E-15 | 6.70307E-14 |
| LOC650368 | 0.393368899  | 8.27552E-15 | 6.72133E-14 |
| CCNB2     | 0.393330533  | 8.32951E-15 | 6.76242E-14 |
| EFTUD2    | 0.393277443  | 8.4048E-15  | 6.82077E-14 |
| ZNF264    | -0.393235749 | 8.4644E-15  | 6.86634E-14 |
| CRYGS     | 0.393196029  | 8.52156E-15 | 6.90989E-14 |
| OTUB1     | 0.393164203  | 8.56763E-15 | 6.94442E-14 |
| KARS      | 0.393100339  | 8.66082E-15 | 7.0171E-14  |
| C14orf93  | 0.393072341  | 8.70199E-15 | 7.04758E-14 |
| LONRF1    | -0.393046837 | 8.73965E-15 | 7.07521E-14 |
| C2CD3     | -0.393022727 | 8.77541E-15 | 7.10127E-14 |
| ZNF720    | -0.392825525 | 9.07329E-15 | 7.33934E-14 |
| SF3A2     | 0.392818851  | 9.08354E-15 | 7.34465E-14 |
| SPATA1    | -0.392677146 | 9.30393E-15 | 7.51979E-14 |
| BCAP31    | 0.392631068  | 9.37671E-15 | 7.57555E-14 |
| NANOS1    | 0.392532502  | 9.53429E-15 | 7.69973E-14 |
| ZBTB37    | -0.392499376 | 9.58783E-15 | 7.73983E-14 |
| HSCB      | 0.39243882   | 9.68646E-15 | 7.81628E-14 |
| CLVS1     | 0.392424832  | 9.70938E-15 | 7.83161E-14 |
| NLRP6     | -0.392407862 | 9.73727E-15 | 7.85092E-14 |
| MEX3C     | -0.392311479 | 9.89712E-15 | 7.97658E-14 |
| ATP5O     | 0.392264286  | 9.97633E-15 | 8.03716E-14 |
| TAOK3     | -0.39224673  | 1.0006E-14  | 8.05777E-14 |
| USP49     | -0.392197941 | 1.00887E-14 | 8.12115E-14 |
| ARID4B    | -0.3921628   | 1.01488E-14 | 8.16618E-14 |
| PPM1A     | -0.392137616 | 1.0192E-14  | 8.19766E-14 |
| KIAA0101  | 0.392065254  | 1.03173E-14 | 8.29506E-14 |
| FBXW9     | 0.392050834  | 1.03424E-14 | 8.31191E-14 |
| ZNF292    | -0.391969865 | 1.04847E-14 | 8.42287E-14 |
| TRIAP1    | 0.391919281  | 1.05746E-14 | 8.49163E-14 |
| EHD3      | -0.391905083 | 1.05999E-14 | 8.50828E-14 |
| DPF3      | -0.391902893 | 1.06038E-14 | 8.50828E-14 |

|           |              |             |             |
|-----------|--------------|-------------|-------------|
| ERP29     | 0.391819802  | 1.07535E-14 | 8.62488E-14 |
| CAPS2     | -0.391724698 | 1.09273E-14 | 8.76077E-14 |
| EPS15     | -0.39167584  | 1.10177E-14 | 8.82967E-14 |
| ZNF484    | -0.391631215 | 1.11009E-14 | 8.89276E-14 |
| ZMAT2     | 0.391586474  | 1.11849E-14 | 8.95324E-14 |
| THAP6     | -0.391586222 | 1.11854E-14 | 8.95324E-14 |
| WIPF2     | -0.391567472 | 1.12208E-14 | 8.97796E-14 |
| HCRT      | 0.391507137  | 1.13354E-14 | 9.06605E-14 |
| GOLGB1    | -0.391478754 | 1.13897E-14 | 9.10584E-14 |
| TUBGCP4   | -0.39145824  | 1.14292E-14 | 9.13369E-14 |
| NDUFAB1   | 0.391447645  | 1.14496E-14 | 9.14634E-14 |
| PPP1R11   | 0.391363364  | 1.16132E-14 | 9.27336E-14 |
| AHNAK     | -0.391246293 | 1.18444E-14 | 9.45414E-14 |
| WNK3      | -0.391192717 | 1.19517E-14 | 9.53595E-14 |
| RIN2      | -0.391186964 | 1.19632E-14 | 9.54051E-14 |
| COASY     | 0.391185116  | 1.1967E-14  | 9.54051E-14 |
| RAB30     | -0.391151813 | 1.20342E-14 | 9.59029E-14 |
| TYSND1    | 0.391006413  | 1.23322E-14 | 9.82382E-14 |
| PUM2      | -0.390967035 | 1.24141E-14 | 9.88513E-14 |
| SOS1      | -0.390958142 | 1.24327E-14 | 9.89597E-14 |
| GPAA1     | 0.390932583  | 1.24862E-14 | 9.93462E-14 |
| RHOG      | 0.390924511  | 1.25032E-14 | 9.94414E-14 |
| BAG2      | 0.390792232  | 1.27843E-14 | 1.01637E-13 |
| TLE4      | -0.390768054 | 1.28364E-14 | 1.0201E-13  |
| PRSS54    | 0.390655946  | 1.30804E-14 | 1.03908E-13 |
| MVD       | 0.390570623  | 1.32692E-14 | 1.05366E-13 |
| RPUSD1    | 0.390508705  | 1.34079E-14 | 1.06424E-13 |
| CMTM1     | -0.390380405 | 1.36998E-14 | 1.08698E-13 |
| ZNF420    | -0.390376181 | 1.37095E-14 | 1.08731E-13 |
| NOS1AP    | -0.390369142 | 1.37257E-14 | 1.08811E-13 |
| TMEM106B  | -0.39036707  | 1.37305E-14 | 1.08811E-13 |
| THSD7A    | -0.390354649 | 1.37591E-14 | 1.08995E-13 |
| PTCH1     | -0.390321483 | 1.38359E-14 | 1.0956E-13  |
| C1orf86   | 0.390214238  | 1.40871E-14 | 1.11504E-13 |
| SMCHD1    | -0.390159831 | 1.42162E-14 | 1.12481E-13 |
| CTTNBP2NL | -0.390154479 | 1.4229E-14  | 1.12538E-13 |
| RGP1      | -0.390113799 | 1.43264E-14 | 1.13263E-13 |
| ALKBH2    | 0.390054802  | 1.44688E-14 | 1.14344E-13 |
| SMC1A     | -0.390051346 | 1.44772E-14 | 1.14364E-13 |
| DMD       | -0.389994749 | 1.46151E-14 | 1.15409E-13 |
| SNUPN     | 0.389975468  | 1.46625E-14 | 1.15736E-13 |
| CDKN3     | 0.389950509  | 1.47239E-14 | 1.16175E-13 |
| CLPP      | 0.389893266  | 1.48658E-14 | 1.17231E-13 |
| FKBP14    | -0.389891822 | 1.48694E-14 | 1.17231E-13 |
| MSRB2     | 0.389844636  | 1.49874E-14 | 1.18114E-13 |
| C9orf114  | 0.389814683  | 1.50628E-14 | 1.18661E-13 |

|           |              |             |             |
|-----------|--------------|-------------|-------------|
| SYF2      | 0.38978969   | 1.5126E-14  | 1.19112E-13 |
| NUBP2     | 0.389709839  | 1.53296E-14 | 1.20668E-13 |
| PLXNA4    | -0.389697149 | 1.53622E-14 | 1.20877E-13 |
| C19orf71  | -0.389612089 | 1.55825E-14 | 1.2254E-13  |
| SFRS9     | 0.389610764  | 1.5586E-14  | 1.2254E-13  |
| RPL21     | 0.389567274  | 1.56999E-14 | 1.23387E-13 |
| TIRAP     | -0.389504982 | 1.58644E-14 | 1.24631E-13 |
| MRPL54    | 0.389390752  | 1.61704E-14 | 1.26985E-13 |
| PKMYT1    | 0.389223269  | 1.66297E-14 | 1.3054E-13  |
| WNT3      | -0.389179309 | 1.67523E-14 | 1.31451E-13 |
| LOC100133 | -0.389109178 | 1.69498E-14 | 1.32948E-13 |
| TRPT1     | 0.388997349  | 1.72695E-14 | 1.35402E-13 |
| SAMD9     | -0.388934607 | 1.74514E-14 | 1.36775E-13 |
| HACE1     | -0.38886882  | 1.76441E-14 | 1.38231E-13 |
| DSCR3     | -0.388784757 | 1.78935E-14 | 1.40129E-13 |
| FKBP9L    | -0.388742924 | 1.80189E-14 | 1.41056E-13 |
| RGL1      | -0.388595836 | 1.84665E-14 | 1.44503E-13 |
| C16orf52  | -0.388562848 | 1.85684E-14 | 1.45243E-13 |
| DENND1B   | -0.388553225 | 1.85982E-14 | 1.4542E-13  |
| ILF2      | 0.388510032  | 1.87327E-14 | 1.46413E-13 |
| RASSF7    | 0.388506797  | 1.87428E-14 | 1.46435E-13 |
| NFU1      | 0.388383227  | 1.91329E-14 | 1.49424E-13 |
| SORBS2    | -0.388333187 | 1.92932E-14 | 1.50617E-13 |
| BAHCC1    | -0.38832448  | 1.93212E-14 | 1.50776E-13 |
| RAP2C     | -0.388234506 | 1.9613E-14  | 1.52994E-13 |
| FOXO1     | -0.388165893 | 1.98385E-14 | 1.54692E-13 |
| DCHS1     | -0.388154478 | 1.98762E-14 | 1.54883E-13 |
| ZNF428    | 0.388153793  | 1.98785E-14 | 1.54883E-13 |
| C2orf86   | -0.388093279 | 2.00799E-14 | 1.5639E-13  |
| TSSC1     | 0.387863413  | 2.0863E-14  | 1.62427E-13 |
| ZNF674    | -0.3878563   | 2.08877E-14 | 1.62555E-13 |
| MLLT10    | -0.387762786 | 2.12152E-14 | 1.6504E-13  |
| CLASP2    | -0.387578806 | 2.18743E-14 | 1.70077E-13 |
| DIP2C     | -0.387577285 | 2.18798E-14 | 1.70077E-13 |
| MAP3K5    | -0.387564775 | 2.19254E-14 | 1.70333E-13 |
| BCKDHB    | -0.387563523 | 2.19299E-14 | 1.70333E-13 |
| CCDC34    | 0.387524482  | 2.20727E-14 | 1.71375E-13 |
| HAUS8     | 0.387510072  | 2.21256E-14 | 1.71719E-13 |
| PPP1R15B  | -0.387499414 | 2.21648E-14 | 1.71957E-13 |
| SLC39A14  | -0.387480538 | 2.22345E-14 | 1.7243E-13  |
| EBNA1BP2  | 0.387459656  | 2.23118E-14 | 1.72962E-13 |
| PCDHB11   | -0.387385823 | 2.25871E-14 | 1.75028E-13 |
| GPRIN3    | -0.387335247 | 2.27777E-14 | 1.76436E-13 |
| NTN3      | -0.387321094 | 2.28313E-14 | 1.76783E-13 |
| TTC8      | -0.387297936 | 2.29193E-14 | 1.77395E-13 |
| MRPL45    | 0.387294258  | 2.29333E-14 | 1.77434E-13 |



|           |              |             |             |
|-----------|--------------|-------------|-------------|
| ZBTB44    | -0.387282359 | 2.29786E-14 | 1.77716E-13 |
| GSTO1     | 0.387277477  | 2.29973E-14 | 1.77791E-13 |
| C1orf151  | 0.387250906  | 2.3099E-14  | 1.78508E-13 |
| LOC150381 | 0.387222689  | 2.32074E-14 | 1.79277E-13 |
| TTC27     | 0.387081658  | 2.37571E-14 | 1.83452E-13 |
| TBC1D9B   | -0.387057319 | 2.38533E-14 | 1.84123E-13 |
| AGL       | -0.387044868 | 2.39026E-14 | 1.84432E-13 |
| SLC25A19  | 0.38700744   | 2.40515E-14 | 1.85509E-13 |
| RBBP6     | -0.386956334 | 2.42563E-14 | 1.87017E-13 |
| TTC14     | -0.386811411 | 2.48463E-14 | 1.91491E-13 |
| NIPA1     | -0.386719504 | 2.52277E-14 | 1.94356E-13 |
| MANF      | 0.386711208  | 2.52624E-14 | 1.94548E-13 |
| RUSC2     | -0.386707441 | 2.52782E-14 | 1.94594E-13 |
| GFM1      | -0.386683895 | 2.53771E-14 | 1.9528E-13  |
| C8orf76   | 0.386662735  | 2.54662E-14 | 1.9589E-13  |
| SLC24A1   | -0.386657386 | 2.54888E-14 | 1.95988E-13 |
| TADA3     | 0.386654974  | 2.5499E-14  | 1.95991E-13 |
| UQCR11    | 0.386631281  | 2.55993E-14 | 1.96686E-13 |
| HGSNAT    | -0.386602291 | 2.57225E-14 | 1.97557E-13 |
| USPL1     | -0.386571027 | 2.58561E-14 | 1.98506E-13 |
| EAF1      | -0.386272627 | 2.71657E-14 | 2.0848E-13  |
| CCDC75    | -0.386224056 | 2.73849E-14 | 2.10081E-13 |
| TBC1D8    | -0.386196495 | 2.75101E-14 | 2.1096E-13  |
| LOC729020 | -0.386004143 | 2.83993E-14 | 2.17695E-13 |
| C4orf12   | -0.385950813 | 2.86508E-14 | 2.19539E-13 |
| LIN7B     | 0.385897715  | 2.89034E-14 | 2.21389E-13 |
| SEC14L1   | -0.385857991 | 2.90938E-14 | 2.22735E-13 |
| GLRX3     | 0.385856395  | 2.91014E-14 | 2.22735E-13 |
| CBR4      | -0.385650112 | 3.01102E-14 | 2.30367E-13 |
| TMEM47    | -0.385608174 | 3.03195E-14 | 2.31879E-13 |
| NTN4      | -0.385592673 | 3.03972E-14 | 2.32384E-13 |
| FOXJ2     | -0.385562136 | 3.05508E-14 | 2.33469E-13 |
| EPHA3     | -0.385531041 | 3.0708E-14  | 2.3458E-13  |
| VPRBP     | -0.385525368 | 3.07368E-14 | 2.3471E-13  |
| KIAA0317  | -0.385508549 | 3.08223E-14 | 2.35272E-13 |
| RABIF     | 0.385477058  | 3.09829E-14 | 2.36408E-13 |
| PARP9     | -0.385402436 | 3.13668E-14 | 2.39245E-13 |
| GIGYF2    | -0.385396526 | 3.13974E-14 | 2.39387E-13 |
| PIP5K1A   | -0.385354043 | 3.16182E-14 | 2.40978E-13 |
| HDGFRP3   | -0.385308629 | 3.1856E-14  | 2.42698E-13 |
| CSE1L     | 0.385296572  | 3.19194E-14 | 2.43088E-13 |
| KCTD9     | -0.385264129 | 3.20906E-14 | 2.44299E-13 |
| TPP2      | -0.385221486 | 3.23171E-14 | 2.45929E-13 |
| POU2F1    | 0.385195529  | 3.24557E-14 | 2.46889E-13 |
| IL33      | -0.3851745   | 3.25685E-14 | 2.47652E-13 |
| C1orf85   | 0.385161115  | 3.26404E-14 | 2.48104E-13 |

|           |              |             |             |
|-----------|--------------|-------------|-------------|
| HDX       | -0.385157713 | 3.26587E-14 | 2.48149E-13 |
| MBP       | -0.385096887 | 3.29878E-14 | 2.50554E-13 |
| SEC14L4   | -0.384991285 | 3.3567E-14  | 2.54855E-13 |
| PCSK5     | -0.384969652 | 3.36868E-14 | 2.55668E-13 |
| ZNF430    | -0.384965724 | 3.37086E-14 | 2.55736E-13 |
| MBD5      | -0.384949476 | 3.3799E-14  | 2.56324E-13 |
| MYO10     | -0.384927821 | 3.39198E-14 | 2.57142E-13 |
| DRG2      | 0.384910522  | 3.40166E-14 | 2.57778E-13 |
| ANO1      | -0.384882519 | 3.41738E-14 | 2.58871E-13 |
| SRP19     | 0.384798525  | 3.46498E-14 | 2.62377E-13 |
| SKA1      | 0.384719754  | 3.51021E-14 | 2.65701E-13 |
| RC3H1     | -0.384607399 | 3.57573E-14 | 2.70557E-13 |
| SLC35A3   | -0.38456599  | 3.60017E-14 | 2.72303E-13 |
| PLAT      | -0.384531026 | 3.62094E-14 | 2.7377E-13  |
| YIF1B     | 0.384430621  | 3.68124E-14 | 2.78223E-13 |
| PIK3R3    | -0.384395473 | 3.70258E-14 | 2.7973E-13  |
| DNAJB2    | 0.384371212  | 3.71738E-14 | 2.80741E-13 |
| FBXL15    | 0.384250655  | 3.79178E-14 | 2.86252E-13 |
| DAPK1     | -0.3842202   | 3.81081E-14 | 2.87579E-13 |
| OIP5      | 0.384168372  | 3.8434E-14  | 2.89929E-13 |
| TIPARP    | -0.384116405 | 3.87636E-14 | 2.92304E-13 |
| C14orf37  | -0.384078109 | 3.90082E-14 | 2.94038E-13 |
| FKBP4     | 0.384043715  | 3.92292E-14 | 2.95592E-13 |
| HELZ      | -0.384034741 | 3.9287E-14  | 2.95916E-13 |
| DPYSL2    | -0.383886818 | 4.02529E-14 | 3.03076E-13 |
| ARAP3     | -0.383883908 | 4.02721E-14 | 3.03106E-13 |
| EPB41L4A  | -0.383861783 | 4.04186E-14 | 3.04094E-13 |
| MTF1      | -0.383780412 | 4.0962E-14  | 3.08066E-13 |
| ZNF576    | 0.383770238  | 4.10304E-14 | 3.08464E-13 |
| LYAR      | 0.383745817  | 4.11952E-14 | 3.09586E-13 |
| SPOPL     | -0.383698148 | 4.15186E-14 | 3.11784E-13 |
| C16orf45  | -0.383698088 | 4.1519E-14  | 3.11784E-13 |
| TUBE1     | -0.383672999 | 4.16902E-14 | 3.12952E-13 |
| EBP       | 0.383640191  | 4.19152E-14 | 3.14522E-13 |
| CTNBL1    | 0.383584871  | 4.22972E-14 | 3.17269E-13 |
| LOC100132 | -0.383470671 | 4.30966E-14 | 3.23143E-13 |
| DOCK10    | -0.383388082 | 4.36839E-14 | 3.27424E-13 |
| BCOR      | -0.38337054  | 4.38096E-14 | 3.28243E-13 |
| LMO7      | -0.383343208 | 4.40063E-14 | 3.29592E-13 |
| SETD5     | -0.383330103 | 4.41009E-14 | 3.30176E-13 |
| KALRN     | -0.383318411 | 4.41854E-14 | 3.30685E-13 |
| SLC4A4    | -0.383262634 | 4.4591E-14  | 3.33595E-13 |
| UFSP1     | 0.383249037  | 4.46904E-14 | 3.34213E-13 |
| FIBP      | 0.383195934  | 4.50808E-14 | 3.37006E-13 |
| C8orf33   | 0.383165436  | 4.53065E-14 | 3.38566E-13 |
| MAML3     | -0.383141091 | 4.54875E-14 | 3.39791E-13 |

|           |              |             |             |
|-----------|--------------|-------------|-------------|
| TUBD1     | 0.383089087  | 4.58764E-14 | 3.42568E-13 |
| CHD1      | -0.383083915 | 4.59153E-14 | 3.42653E-13 |
| GAS1      | -0.383082995 | 4.59222E-14 | 3.42653E-13 |
| CNOT10    | 0.383053033  | 4.61479E-14 | 3.44208E-13 |
| TSPYL3    | -0.382935134 | 4.7047E-14  | 3.50783E-13 |
| TSPYL1    | -0.382878992 | 4.74811E-14 | 3.53887E-13 |
| SPTY2D1   | -0.38266313  | 4.9187E-14  | 3.66465E-13 |
| LOC283922 | -0.382647621 | 4.93119E-14 | 3.67257E-13 |
| SUMO1P3   | 0.382602407  | 4.96777E-14 | 3.69843E-13 |
| TIE1      | -0.382577869 | 4.98773E-14 | 3.71191E-13 |
| RAN       | 0.382564413  | 4.99871E-14 | 3.71869E-13 |
| RRP12     | 0.382534282  | 5.02338E-14 | 3.73565E-13 |
| TATDN1    | 0.382488649  | 5.06097E-14 | 3.7622E-13  |
| SP4       | -0.382458262 | 5.08615E-14 | 3.77951E-13 |
| HOOK3     | -0.382319686 | 5.20257E-14 | 3.86457E-13 |
| MAD2L2    | 0.382210082  | 5.29649E-14 | 3.93287E-13 |
| PSMB2     | 0.382169326  | 5.33184E-14 | 3.95765E-13 |
| HSBP1L1   | 0.382118915  | 5.37588E-14 | 3.98885E-13 |
| ADAMTS2   | -0.382087126 | 5.40383E-14 | 4.0081E-13  |
| ZNF691    | 0.3820696    | 5.41931E-14 | 4.01808E-13 |
| FAM149A   | -0.381971085 | 5.50709E-14 | 4.08164E-13 |
| ERLIN2    | -0.3819148   | 5.55787E-14 | 4.11774E-13 |
| RAD51     | 0.381881962  | 5.5877E-14  | 4.13831E-13 |
| MND1      | 0.381818572  | 5.64574E-14 | 4.17974E-13 |
| SYNGR2    | 0.381782177  | 5.67933E-14 | 4.20304E-13 |
| RASAL2    | -0.38170989  | 5.74662E-14 | 4.25126E-13 |
| BCLAF1    | -0.381702728 | 5.75333E-14 | 4.25465E-13 |
| GOLGA5    | -0.381677548 | 5.77698E-14 | 4.27055E-13 |
| HEXIM2    | 0.381656914  | 5.79644E-14 | 4.28334E-13 |
| TSSK1B    | -0.381608125 | 5.84269E-14 | 4.31592E-13 |
| RND3      | -0.381505984 | 5.94068E-14 | 4.38668E-13 |
| SLCO2A1   | -0.381377966 | 6.06578E-14 | 4.47739E-13 |
| GLCCI1    | -0.381286663 | 6.15657E-14 | 4.54272E-13 |
| KCNB1     | -0.381280805 | 6.16244E-14 | 4.54537E-13 |
| AIDA      | 0.381238091  | 6.20541E-14 | 4.57537E-13 |
| NDUFA4    | 0.38113508   | 6.31025E-14 | 4.65095E-13 |
| LOC645166 | 0.381116258  | 6.3296E-14  | 4.66348E-13 |
| ZFYVE1    | -0.3811104   | 6.33563E-14 | 4.6662E-13  |
| RSL24D1   | 0.381068855  | 6.37857E-14 | 4.69609E-13 |
| RPS26     | 0.381035227  | 6.41353E-14 | 4.72009E-13 |
| FGD6      | -0.381008401 | 6.44156E-14 | 4.73896E-13 |
| DCBLD1    | -0.380873521 | 6.58431E-14 | 4.84055E-13 |
| CEP192    | -0.380873338 | 6.58451E-14 | 4.84055E-13 |
| STON1     | -0.380797218 | 6.66643E-14 | 4.89897E-13 |
| REPS2     | -0.380743677 | 6.72465E-14 | 4.93993E-13 |
| APP       | -0.380696426 | 6.77645E-14 | 4.97614E-13 |

|          |              |             |             |
|----------|--------------|-------------|-------------|
| BPTF     | -0.38065068  | 6.82696E-14 | 5.01139E-13 |
| ABCA9    | -0.380567883 | 6.91933E-14 | 5.07732E-13 |
| NDUFA6   | 0.380544172  | 6.94601E-14 | 5.09502E-13 |
| PLS3     | -0.380474027 | 7.02552E-14 | 5.15145E-13 |
| NFKBIL2  | 0.380470663  | 7.02936E-14 | 5.15236E-13 |
| EIF5A    | 0.380393357  | 7.11807E-14 | 5.21546E-13 |
| SUB1     | 0.380378715  | 7.13499E-14 | 5.22594E-13 |
| RBMX2    | 0.380359533  | 7.15722E-14 | 5.2403E-13  |
| FLAD1    | 0.380069794  | 7.5014E-14  | 5.49027E-13 |
| DDHD2    | -0.380011709 | 7.57232E-14 | 5.54014E-13 |
| TIMM8A   | 0.379980993  | 7.61009E-14 | 5.56573E-13 |
| POLR2B   | -0.37983605  | 7.79081E-14 | 5.69523E-13 |
| VPS13B   | -0.379834421 | 7.79287E-14 | 5.69523E-13 |
| KLHDC4   | 0.379809146  | 7.82482E-14 | 5.71648E-13 |
| CRAMP1L  | -0.379744572 | 7.90703E-14 | 5.77442E-13 |
| TNNI3K   | -0.37974055  | 7.91218E-14 | 5.77607E-13 |
| FAM158A  | 0.379678341  | 7.99223E-14 | 5.83237E-13 |
| ZZZ3     | -0.379674087 | 7.99773E-14 | 5.83425E-13 |
| HCG18    | 0.379647002  | 8.03286E-14 | 5.85772E-13 |
| ZFP161   | -0.379629331 | 8.05586E-14 | 5.87234E-13 |
| ZBTB4    | -0.379507815 | 8.21575E-14 | 5.98671E-13 |
| RASGRF2  | -0.379496827 | 8.23037E-14 | 5.99516E-13 |
| LRRC58   | -0.379443373 | 8.30181E-14 | 6.04499E-13 |
| PSRC1    | 0.379287702  | 8.51334E-14 | 6.19675E-13 |
| TMEM106C | 0.379260901  | 8.55029E-14 | 6.22137E-13 |
| ATG4B    | 0.379216104  | 8.61239E-14 | 6.26427E-13 |
| POLG     | -0.379118901 | 8.74868E-14 | 6.36108E-13 |
| EIF4H    | -0.379112015 | 8.75841E-14 | 6.36583E-13 |
| LOC90586 | -0.379086939 | 8.79395E-14 | 6.38933E-13 |
| SYNPO    | -0.378977947 | 8.95006E-14 | 6.50038E-13 |
| TRANK1   | -0.378803898 | 9.20499E-14 | 6.6831E-13  |
| TNFAIP1  | -0.378733213 | 9.31054E-14 | 6.75727E-13 |
| C17orf53 | 0.3787276    | 9.31897E-14 | 6.76092E-13 |
| HDAC3    | 0.378716076  | 9.33631E-14 | 6.77103E-13 |
| DPH3B    | -0.378617839 | 9.48537E-14 | 6.87664E-13 |
| SLC8A1   | -0.378456354 | 9.73549E-14 | 7.05539E-13 |
| LIN52    | -0.378434171 | 9.77035E-14 | 7.07808E-13 |
| TLR6     | -0.378358284 | 9.89052E-14 | 7.16254E-13 |
| USP32    | -0.378336416 | 9.92542E-14 | 7.18346E-13 |
| ITGA4    | -0.378335655 | 9.92663E-14 | 7.18346E-13 |
| GRK6     | 0.378314467  | 9.96057E-14 | 7.2054E-13  |
| GNPTAB   | -0.378248223 | 1.00674E-13 | 7.28003E-13 |
| GOLGA1   | -0.378240929 | 1.00792E-13 | 7.28594E-13 |
| TMEM11   | 0.378227191  | 1.01015E-13 | 7.29942E-13 |
| ADAMTSL3 | -0.378221585 | 1.01107E-13 | 7.30336E-13 |
| STS      | -0.378117153 | 1.02821E-13 | 7.42231E-13 |

|           |              |             |             |
|-----------|--------------|-------------|-------------|
| KCND3     | -0.378116717 | 1.02828E-13 | 7.42231E-13 |
| LOC339674 | 0.378103629  | 1.03045E-13 | 7.43527E-13 |
| MTOR      | -0.377831337 | 1.07658E-13 | 7.76535E-13 |
| CHCHD4    | 0.377781938  | 1.08517E-13 | 7.82364E-13 |
| KIAA0913  | -0.377780322 | 1.08545E-13 | 7.82364E-13 |
| TAZ       | 0.377747123  | 1.09126E-13 | 7.86265E-13 |
| CAMK1     | 0.377728148  | 1.09459E-13 | 7.88382E-13 |
| B3GALT6   | 0.377686852  | 1.10188E-13 | 7.93344E-13 |
| STARD13   | -0.377597188 | 1.11787E-13 | 8.04566E-13 |
| PRMT1     | 0.377553804  | 1.12569E-13 | 8.099E-13   |
| KL        | -0.377514542 | 1.13281E-13 | 8.14729E-13 |
| SOCS5     | -0.377507167 | 1.13415E-13 | 8.154E-13   |
| ARL2      | 0.377409156  | 1.15214E-13 | 8.28036E-13 |
| BCL2      | -0.377385569 | 1.15651E-13 | 8.30877E-13 |
| YES1      | -0.377366339 | 1.16009E-13 | 8.33146E-13 |
| NAF1      | -0.377328848 | 1.16709E-13 | 8.37872E-13 |
| CTDSPL2   | -0.377285808 | 1.17518E-13 | 8.43376E-13 |
| ATR       | -0.377259787 | 1.1801E-13  | 8.466E-13   |
| INHBC     | -0.377081506 | 1.21433E-13 | 8.70848E-13 |
| RALGPS1   | -0.377024483 | 1.22549E-13 | 8.78434E-13 |
| COX7A2    | 0.377022926  | 1.22579E-13 | 8.78434E-13 |
| MAN1C1    | -0.377012574 | 1.22783E-13 | 8.79577E-13 |
| TRAF2     | 0.3770097    | 1.2284E-13  | 8.79666E-13 |
| ACAD8     | -0.376997112 | 1.23088E-13 | 8.81126E-13 |
| SGCB      | -0.376945374 | 1.24113E-13 | 8.88145E-13 |
| IFI27L1   | 0.376873556  | 1.2555E-13  | 8.98105E-13 |
| SGK1      | -0.376836161 | 1.26304E-13 | 9.03178E-13 |
| DPY19L1   | -0.376787394 | 1.27295E-13 | 9.09936E-13 |
| ARL3      | 0.37675161   | 1.28027E-13 | 9.14839E-13 |
| ADPRHL2   | 0.376730223  | 1.28466E-13 | 9.17649E-13 |
| PTMA      | 0.376715867  | 1.28762E-13 | 9.19432E-13 |
| PIN1      | 0.376688926  | 1.29319E-13 | 9.23076E-13 |
| C8orf4    | -0.376659508 | 1.29929E-13 | 9.27103E-13 |
| COL6A3    | -0.376613919 | 1.30881E-13 | 9.33561E-13 |
| ZNF432    | -0.376560203 | 1.32012E-13 | 9.41287E-13 |
| CLEC1A    | -0.376510809 | 1.3306E-13  | 9.48419E-13 |
| ZDHHC12   | 0.376475415  | 1.33816E-13 | 9.53465E-13 |
| BLOC1S3   | 0.376445107  | 1.34466E-13 | 9.57758E-13 |
| FMO2      | -0.376270437 | 1.38276E-13 | 9.84545E-13 |
| LRIG2     | -0.376242499 | 1.38895E-13 | 9.886E-13   |
| RNF11     | -0.376185353 | 1.4017E-13  | 9.97318E-13 |
| PLCL1     | -0.376178887 | 1.40315E-13 | 9.97993E-13 |
| UBE2J2    | 0.376100109  | 1.42093E-13 | 1.01028E-12 |
| JRKL      | -0.376062361 | 1.42953E-13 | 1.0159E-12  |
| UBN2      | -0.376060919 | 1.42986E-13 | 1.0159E-12  |
| WDR18     | 0.375969433  | 1.45092E-13 | 1.03049E-12 |

|           |              |             |             |
|-----------|--------------|-------------|-------------|
| RFC2      | 0.375920368  | 1.46233E-13 | 1.03823E-12 |
| SLC31A1   | -0.375783855 | 1.49456E-13 | 1.06073E-12 |
| HIST2H2BA | -0.375776754 | 1.49626E-13 | 1.06156E-12 |
| SNHG11    | 0.375638035  | 1.52976E-13 | 1.08494E-12 |
| DOC2B     | -0.37562755  | 1.53232E-13 | 1.08637E-12 |
| SF3B4     | 0.375591031  | 1.54127E-13 | 1.09233E-12 |
| SESN3     | -0.375506835 | 1.56211E-13 | 1.10671E-12 |
| NR1D2     | -0.375475697 | 1.56989E-13 | 1.11182E-12 |
| ARRDC4    | -0.375384704 | 1.59284E-13 | 1.12748E-12 |
| ADAMTSL1  | -0.375383517 | 1.59314E-13 | 1.12748E-12 |
| KRT18     | 0.375273789  | 1.62125E-13 | 1.14697E-12 |
| COPS5     | 0.375236877  | 1.63081E-13 | 1.15333E-12 |
| DSCC1     | 0.375203041  | 1.63963E-13 | 1.15915E-12 |
| U2AF1L4   | 0.375165081  | 1.64958E-13 | 1.16571E-12 |
| ALAD      | -0.375163152 | 1.65008E-13 | 1.16571E-12 |
| GCNT4     | -0.375116435 | 1.66241E-13 | 1.174E-12   |
| DNAJC13   | -0.375078391 | 1.67251E-13 | 1.18072E-12 |
| CAND1     | -0.37502604  | 1.68651E-13 | 1.19018E-12 |
| MARS2     | -0.375010712 | 1.69064E-13 | 1.19267E-12 |
| SH3BP5    | -0.374991441 | 1.69583E-13 | 1.19591E-12 |
| FAS       | -0.374918118 | 1.71574E-13 | 1.20952E-12 |
| PPIAL4C   | 0.374845778  | 1.73561E-13 | 1.2231E-12  |
| EIF4EBP1  | 0.374765698  | 1.75787E-13 | 1.23834E-12 |
| ZNF354C   | -0.374748976 | 1.76255E-13 | 1.2412E-12  |
| LRIG1     | -0.374720376 | 1.77059E-13 | 1.24642E-12 |
| C9orf16   | 0.374575247  | 1.81193E-13 | 1.27467E-12 |
| EFNA4     | 0.374575     | 1.812E-13   | 1.27467E-12 |
| FUT11     | -0.374562154 | 1.8157E-13  | 1.27683E-12 |
| YTHDC1    | -0.374521656 | 1.82743E-13 | 1.28462E-12 |
| SORBS1    | -0.37451717  | 1.82874E-13 | 1.28508E-12 |
| TCEA3     | 0.374485941  | 1.83784E-13 | 1.29058E-12 |
| MTMR1     | -0.374485876 | 1.83786E-13 | 1.29058E-12 |
| VPS52     | 0.374458894  | 1.84575E-13 | 1.29567E-12 |
| ADARB1    | -0.374420904 | 1.85693E-13 | 1.30306E-12 |
| LOC100128 | -0.374396349 | 1.86419E-13 | 1.30769E-12 |
| MYD88     | -0.374374439 | 1.87069E-13 | 1.31179E-12 |
| ISY1      | 0.374319431  | 1.88711E-13 | 1.32284E-12 |
| KDM6B     | -0.374294017 | 1.89474E-13 | 1.32772E-12 |
| LOC441208 | -0.374290229 | 1.89588E-13 | 1.32805E-12 |
| SORL1     | -0.37425025  | 1.90796E-13 | 1.33604E-12 |
| NBPF1     | -0.374231729 | 1.91358E-13 | 1.33951E-12 |
| NOTCH1    | -0.374208444 | 1.92067E-13 | 1.344E-12   |
| CYYR1     | -0.37416638  | 1.93354E-13 | 1.35253E-12 |
| RECQL     | -0.374035696 | 1.97407E-13 | 1.38039E-12 |
| ZNF205    | 0.373971225  | 1.99437E-13 | 1.3941E-12  |
| NOS3      | -0.373961437 | 1.99747E-13 | 1.39577E-12 |

|           |              |             |             |
|-----------|--------------|-------------|-------------|
| SDAD1     | -0.373940407 | 2.00414E-13 | 1.39995E-12 |
| GXYLT1    | -0.373870048 | 2.02663E-13 | 1.41516E-12 |
| SVIL      | -0.37385867  | 2.0303E-13  | 1.41722E-12 |
| ZNF175    | -0.37381546  | 2.04426E-13 | 1.42647E-12 |
| TSHZ2     | -0.373798885 | 2.04964E-13 | 1.42972E-12 |
| MRPS14    | 0.373785464  | 2.054E-13   | 1.43226E-12 |
| PARP3     | -0.37377262  | 2.05819E-13 | 1.43468E-12 |
| EME2      | -0.373757567 | 2.06311E-13 | 1.43761E-12 |
| SLC9A7    | -0.37371239  | 2.07794E-13 | 1.44743E-12 |
| DLL1      | -0.373703512 | 2.08086E-13 | 1.44896E-12 |
| USP28     | -0.373678946 | 2.08898E-13 | 1.45411E-12 |
| EIF4A3    | 0.373633527  | 2.10407E-13 | 1.4641E-12  |
| ASPSCR1   | 0.373548644  | 2.13256E-13 | 1.48341E-12 |
| LOC100216 | 0.373539246  | 2.13574E-13 | 1.4851E-12  |
| CD226     | -0.373531591 | 2.13833E-13 | 1.48638E-12 |
| TRAPPC2P1 | 0.373254764  | 2.23415E-13 | 1.55245E-12 |
| ATP6V1A   | -0.373143679 | 2.27377E-13 | 1.57942E-12 |
| DCAF13    | 0.373046382  | 2.30903E-13 | 1.60336E-12 |
| PGM2      | -0.373033011 | 2.31392E-13 | 1.6062E-12  |
| MFSD3     | 0.373024222  | 2.31714E-13 | 1.60787E-12 |
| SATB2     | -0.373007676 | 2.32321E-13 | 1.61152E-12 |
| LILRA1    | -0.372886763 | 2.36805E-13 | 1.64205E-12 |
| ALPK1     | -0.372861029 | 2.3777E-13  | 1.64817E-12 |
| PDCD6     | 0.37284473   | 2.38384E-13 | 1.65185E-12 |
| SYMPK     | 0.372815653  | 2.39482E-13 | 1.65888E-12 |
| NUDT5     | 0.372792447  | 2.40361E-13 | 1.66439E-12 |
| GEM       | -0.372711912 | 2.43439E-13 | 1.68512E-12 |
| POLD1     | 0.372695767  | 2.44061E-13 | 1.68884E-12 |
| KIAA1267  | -0.372643007 | 2.46103E-13 | 1.70238E-12 |
| ZNF182    | -0.372548276 | 2.49812E-13 | 1.72744E-12 |
| PLEKHA1   | -0.37241286  | 2.5521E-13  | 1.76414E-12 |
| WISP1     | -0.372352319 | 2.57659E-13 | 1.78046E-12 |
| BTBD8     | -0.372228567 | 2.62739E-13 | 1.81493E-12 |
| FLJ35776  | 0.372187474  | 2.64447E-13 | 1.82609E-12 |
| SKA3      | 0.37218138   | 2.64701E-13 | 1.82722E-12 |
| UBXN11    | 0.372077921  | 2.69054E-13 | 1.85662E-12 |
| CCDC111   | -0.372052075 | 2.70152E-13 | 1.86355E-12 |
| SRL       | -0.372042324 | 2.70568E-13 | 1.86577E-12 |
| ENDOD1    | -0.372019837 | 2.71528E-13 | 1.87175E-12 |
| COX16     | 0.37200745   | 2.72059E-13 | 1.87476E-12 |
| RICTOR    | -0.371887208 | 2.77262E-13 | 1.90995E-12 |
| LIN54     | -0.371857256 | 2.78573E-13 | 1.91832E-12 |
| TRIM23    | -0.371836031 | 2.79506E-13 | 1.92408E-12 |
| FAM98B    | -0.371808809 | 2.80707E-13 | 1.93168E-12 |
| TRIM52    | -0.371802531 | 2.80985E-13 | 1.93292E-12 |
| GUCY1A3   | -0.371764875 | 2.82656E-13 | 1.94375E-12 |

|           |              |             |             |
|-----------|--------------|-------------|-------------|
| COX4I1    | 0.371739349  | 2.83794E-13 | 1.9509E-12  |
| EEF2K     | -0.371671522 | 2.86841E-13 | 1.97116E-12 |
| INTS2     | -0.37154419  | 2.92647E-13 | 2.01037E-12 |
| NEXN      | -0.371455373 | 2.96764E-13 | 2.03795E-12 |
| MYPOP     | 0.371443915  | 2.97299E-13 | 2.04092E-12 |
| WDR77     | 0.371314525  | 3.0341E-13  | 2.08216E-12 |
| C2orf69   | -0.371158972 | 3.1092E-13  | 2.13295E-12 |
| FAM108B1  | -0.371096383 | 3.13992E-13 | 2.15329E-12 |
| RGPD5     | -0.371073732 | 3.15111E-13 | 2.16022E-12 |
| PDCD6IP   | -0.371046491 | 3.16463E-13 | 2.16874E-12 |
| LOC100132 | -0.371039407 | 3.16815E-13 | 2.17041E-12 |
| TMED9     | 0.370924004  | 3.22609E-13 | 2.20934E-12 |
| GTF2H5    | 0.370919986  | 3.22812E-13 | 2.20997E-12 |
| C10orf12  | -0.370904101 | 3.23618E-13 | 2.21473E-12 |
| FGFR4     | 0.370857264  | 3.26006E-13 | 2.2303E-12  |
| PYGO1     | -0.37080758  | 3.28558E-13 | 2.24699E-12 |
| SSR4      | 0.370788669  | 3.29535E-13 | 2.2529E-12  |
| PI4K2B    | -0.370742765 | 3.31917E-13 | 2.2684E-12  |
| PUS10     | -0.370692363 | 3.34552E-13 | 2.28563E-12 |
| ITCH      | -0.370660293 | 3.3624E-13  | 2.29637E-12 |
| KDM1A     | 0.370651042  | 3.36728E-13 | 2.29891E-12 |
| NAB1      | -0.370638454 | 3.37393E-13 | 2.30267E-12 |
| DHX36     | -0.370613199 | 3.38732E-13 | 2.31102E-12 |
| MAP3K3    | -0.370512717 | 3.44112E-13 | 2.34691E-12 |
| ASCC3     | -0.370376262 | 3.51551E-13 | 2.39683E-12 |
| GIMAP7    | -0.370329741 | 3.54123E-13 | 2.41354E-12 |
| HSBP1     | 0.370300455  | 3.55751E-13 | 2.42381E-12 |
| BAZ1B     | -0.370296752 | 3.55958E-13 | 2.42438E-12 |
| CGREF1    | 0.370209232  | 3.60871E-13 | 2.45701E-12 |
| C1orf109  | -0.370182555 | 3.62382E-13 | 2.46645E-12 |
| SFRP1     | -0.370168489 | 3.63181E-13 | 2.47105E-12 |
| ZNF225    | -0.37013039  | 3.65354E-13 | 2.48498E-12 |
| TBL3      | 0.370059424  | 3.69436E-13 | 2.51189E-12 |
| LMBRD1    | -0.369922518 | 3.77437E-13 | 2.56541E-12 |
| ERH       | 0.369898164  | 3.78877E-13 | 2.57432E-12 |
| SNX4      | -0.369841328 | 3.82261E-13 | 2.59643E-12 |
| EIF2B3    | 0.369797262  | 3.84905E-13 | 2.61349E-12 |
| UBQLN4    | 0.369785631  | 3.85605E-13 | 2.61736E-12 |
| YAP1      | -0.369737938 | 3.88492E-13 | 2.63605E-12 |
| RIMKLB    | -0.369690461 | 3.91386E-13 | 2.65479E-12 |
| RBM7      | -0.369660416 | 3.93229E-13 | 2.66638E-12 |
| C7orf36   | 0.36958028   | 3.98185E-13 | 2.69907E-12 |
| ARAP2     | -0.369554234 | 3.99809E-13 | 2.70915E-12 |
| GPR172A   | 0.369529948  | 4.01329E-13 | 2.71853E-12 |
| MCF2L     | -0.369432296 | 4.07498E-13 | 2.75874E-12 |
| SPRN      | 0.369431593  | 4.07543E-13 | 2.75874E-12 |



|           |              |             |             |
|-----------|--------------|-------------|-------------|
| S1PR3     | -0.369426249 | 4.07883E-13 | 2.76011E-12 |
| APBA1     | -0.369361746 | 4.12013E-13 | 2.78711E-12 |
| DENND5A   | -0.369347883 | 4.12906E-13 | 2.7922E-12  |
| IFI35     | 0.36931523   | 4.15016E-13 | 2.80552E-12 |
| CFLAR     | -0.369303789 | 4.15758E-13 | 2.80958E-12 |
| IDI2      | 0.369285224  | 4.16965E-13 | 2.81678E-12 |
| PACSIN3   | 0.369259364  | 4.18652E-13 | 2.82721E-12 |
| CYFIP1    | -0.36925683  | 4.18817E-13 | 2.82737E-12 |
| EIF3A     | -0.369204781 | 4.22234E-13 | 2.84947E-12 |
| PLA2G12A  | -0.369194846 | 4.22889E-13 | 2.85293E-12 |
| STX2      | -0.369167532 | 4.24695E-13 | 2.86414E-12 |
| PLAC8L1   | 0.369086464  | 4.30101E-13 | 2.89962E-12 |
| ZNF148    | -0.369070904 | 4.31147E-13 | 2.90568E-12 |
| TXNDC16   | -0.369016402 | 4.34828E-13 | 2.9295E-12  |
| DTWD2     | -0.368974514 | 4.37678E-13 | 2.9477E-12  |
| FRS2      | -0.368920213 | 4.41399E-13 | 2.97176E-12 |
| LOC728758 | 0.368875665  | 4.44476E-13 | 2.99146E-12 |
| EIF4A1    | 0.368825396  | 4.47972E-13 | 3.01397E-12 |
| GPR182    | -0.36880522  | 4.49383E-13 | 3.02245E-12 |
| G2E3      | -0.368735036 | 4.54325E-13 | 3.05465E-12 |
| FGFR1OP2  | -0.368707752 | 4.56261E-13 | 3.06663E-12 |
| RAB11FIP2 | -0.36860301  | 4.63766E-13 | 3.11603E-12 |
| EVI5      | -0.368593858 | 4.64428E-13 | 3.11942E-12 |
| C3orf45   | 0.36846726   | 4.73673E-13 | 3.18045E-12 |
| KRR1      | -0.368436717 | 4.75931E-13 | 3.19453E-12 |
| RAI1      | -0.368405961 | 4.78214E-13 | 3.20877E-12 |
| C1RL      | -0.368375517 | 4.80486E-13 | 3.22293E-12 |
| SHROOM2   | -0.368262038 | 4.89045E-13 | 3.27923E-12 |
| MAML1     | -0.368242294 | 4.90549E-13 | 3.28821E-12 |
| AIM1L     | 0.368132244  | 4.99017E-13 | 3.34385E-12 |
| ARPC5L    | 0.368126637  | 4.99452E-13 | 3.34564E-12 |
| CCDC121   | -0.368103887 | 5.01222E-13 | 3.35637E-12 |
| FAM113A   | 0.367727417  | 5.31415E-13 | 3.55735E-12 |
| CD63      | 0.36766507   | 5.36584E-13 | 3.59075E-12 |
| CNIH4     | 0.367624407  | 5.39982E-13 | 3.61227E-12 |
| SH3BP4    | -0.367606529 | 5.41482E-13 | 3.62109E-12 |
| KDELRL1   | 0.367490273  | 5.51339E-13 | 3.68577E-12 |
| CBX3      | 0.367449214  | 5.54862E-13 | 3.70808E-12 |
| DHX34     | 0.367342363  | 5.64134E-13 | 3.76878E-12 |
| SWAP70    | -0.367319332 | 5.66152E-13 | 3.78099E-12 |
| ARMC7     | 0.367171641  | 5.79263E-13 | 3.86726E-12 |
| GALNT10   | -0.367136635 | 5.82414E-13 | 3.88699E-12 |
| RANGRF    | 0.367100604  | 5.85675E-13 | 3.90744E-12 |
| RPS6KA5   | -0.367047055 | 5.90554E-13 | 3.93867E-12 |
| UBE3A     | -0.366987461 | 5.9603E-13  | 3.97387E-12 |
| ANTXR1    | -0.366815912 | 6.12074E-13 | 4.07947E-12 |

|           |              |             |             |
|-----------|--------------|-------------|-------------|
| ADCY9     | -0.366809345 | 6.12696E-13 | 4.08225E-12 |
| EIF4G2    | -0.366665074 | 6.26528E-13 | 4.17301E-12 |
| LOC654342 | 0.36663339   | 6.29606E-13 | 4.19211E-12 |
| SPCS1     | 0.366607849  | 6.32099E-13 | 4.2073E-12  |
| ARHGAP6   | -0.366588429 | 6.34E-13    | 4.21855E-12 |
| NOTCH3    | -0.366281082 | 6.64848E-13 | 4.42233E-12 |
| PKN1      | 0.366274343  | 6.65541E-13 | 4.42546E-12 |
| HNRNPA3   | 0.366258271  | 6.67195E-13 | 4.43498E-12 |
| ALDH6A1   | -0.366122278 | 6.81357E-13 | 4.5276E-12  |
| GLT8D2    | -0.366095506 | 6.84179E-13 | 4.54484E-12 |
| USP46     | -0.366083932 | 6.85403E-13 | 4.55145E-12 |
| DNAJC8    | 0.366050314  | 6.88969E-13 | 4.57361E-12 |
| AASDHPPT  | -0.366011876 | 6.9307E-13  | 4.59929E-12 |
| CDH11     | -0.365949443 | 6.9978E-13  | 4.64228E-12 |
| ZMAT3     | -0.36594659  | 7.00088E-13 | 4.64278E-12 |
| CNTF      | -0.365891457 | 7.06069E-13 | 4.68088E-12 |
| TUBB2C    | 0.36587943   | 7.07381E-13 | 4.68802E-12 |
| CRY1      | -0.365861354 | 7.09356E-13 | 4.69954E-12 |
| PCDHB4    | -0.365777776 | 7.1856E-13  | 4.75894E-12 |
| LRP5      | -0.365740037 | 7.22754E-13 | 4.78512E-12 |
| ITPRIP    | -0.365720761 | 7.24906E-13 | 4.79777E-12 |
| 43891     | -0.365715025 | 7.25547E-13 | 4.80042E-12 |
| SUMO1     | 0.36570858   | 7.26269E-13 | 4.8036E-12  |
| ZNRF1     | 0.36565766   | 7.31993E-13 | 4.83985E-12 |
| NAV2      | -0.36563945  | 7.34051E-13 | 4.85185E-12 |
| FAM176B   | 0.365583245  | 7.40437E-13 | 4.89244E-12 |
| GINS2     | 0.365458893  | 7.54762E-13 | 4.98543E-12 |
| SVEP1     | -0.365411283 | 7.60318E-13 | 5.02047E-12 |
| GPRASP1   | -0.365400184 | 7.61619E-13 | 5.02739E-12 |
| KRAS      | -0.365340856 | 7.68609E-13 | 5.07185E-12 |
| POLR2D    | 0.365317937  | 7.71327E-13 | 5.0881E-12  |
| RECQL5    | 0.365276645  | 7.76246E-13 | 5.11886E-12 |
| RALBP1    | -0.365258191 | 7.78455E-13 | 5.13172E-12 |
| ARHGEF7   | -0.365130082 | 7.93957E-13 | 5.23218E-12 |
| CAMSAP1   | -0.365114316 | 7.95885E-13 | 5.24315E-12 |
| RPRD1B    | -0.365105426 | 7.96974E-13 | 5.24859E-12 |
| YPEL3     | 0.365098596  | 7.97812E-13 | 5.25238E-12 |
| EIF1AD    | 0.365084403  | 7.99557E-13 | 5.26212E-12 |
| DCTN3     | 0.365037232  | 8.0538E-13  | 5.29869E-12 |
| SIRPB2    | -0.36501976  | 8.07547E-13 | 5.3112E-12  |
| C19orf55  | -0.364955595 | 8.15556E-13 | 5.3621E-12  |
| TRIM2     | -0.364924678 | 8.19443E-13 | 5.38588E-12 |
| UBE3B     | -0.364890634 | 8.23744E-13 | 5.41236E-12 |
| KIF13A    | -0.364882851 | 8.2473E-13  | 5.41705E-12 |
| TTC30B    | -0.364844624 | 8.29591E-13 | 5.44718E-12 |
| FRAT2     | 0.364829746  | 8.31491E-13 | 5.45786E-12 |

|           |              |             |             |
|-----------|--------------|-------------|-------------|
| CYP1B1    | -0.364750087 | 8.41734E-13 | 5.52327E-12 |
| C9orf100  | 0.364742692  | 8.42691E-13 | 5.52773E-12 |
| SCO2      | 0.364716427  | 8.46099E-13 | 5.54826E-12 |
| SF3B1     | -0.36460832  | 8.60268E-13 | 5.63932E-12 |
| IPO8      | -0.364530363 | 8.7063E-13  | 5.70536E-12 |
| RNF165    | -0.364458944 | 8.8023E-13  | 5.76637E-12 |
| GIMAP8    | -0.364434438 | 8.83547E-13 | 5.7862E-12  |
| ZNF678    | -0.364379651 | 8.91009E-13 | 5.83315E-12 |
| EIF3CL    | 0.364303592  | 9.01469E-13 | 5.89969E-12 |
| IRF6      | -0.364296407 | 9.02464E-13 | 5.90426E-12 |
| ACSL1     | -0.364259395 | 9.07603E-13 | 5.93593E-12 |
| PCDH18    | -0.364152169 | 9.22654E-13 | 6.03239E-12 |
| DLK2      | 0.364143743  | 9.23847E-13 | 6.0382E-12  |
| MTMR3     | -0.364053694 | 9.36691E-13 | 6.12014E-12 |
| CCDC94    | 0.364041452  | 9.38451E-13 | 6.12963E-12 |
| EIF3E     | 0.364038192  | 9.3892E-13  | 6.13068E-12 |
| DOHH      | 0.363950685  | 9.51598E-13 | 6.21143E-12 |
| MCAT      | 0.363872043  | 9.63134E-13 | 6.28467E-12 |
| MAP1B     | -0.363847829 | 9.66713E-13 | 6.30596E-12 |
| SUV420H1  | -0.363798667 | 9.74021E-13 | 6.35155E-12 |
| ZADH2     | -0.363775409 | 9.77497E-13 | 6.37213E-12 |
| AKAP6     | -0.363745524 | 9.81981E-13 | 6.39926E-12 |
| DUSP16    | -0.363718497 | 9.86054E-13 | 6.4237E-12  |
| SNX29     | -0.363582806 | 1.00675E-12 | 6.55639E-12 |
| COL4A3    | -0.363541865 | 1.01308E-12 | 6.59357E-12 |
| ATP2C1    | -0.363541587 | 1.01312E-12 | 6.59357E-12 |
| IFRD2     | 0.36348402   | 1.02209E-12 | 6.64973E-12 |
| PRIC285   | -0.363459459 | 1.02593E-12 | 6.67063E-12 |
| SUPV3L1   | 0.363458649  | 1.02606E-12 | 6.67063E-12 |
| LASS5     | 0.363457113  | 1.0263E-12  | 6.67063E-12 |
| UBAC2     | 0.363441409  | 1.02877E-12 | 6.68449E-12 |
| EXD2      | -0.363401994 | 1.03499E-12 | 6.72272E-12 |
| USP42     | -0.363396733 | 1.03582E-12 | 6.72594E-12 |
| ZNF518A   | -0.36337719  | 1.03893E-12 | 6.74387E-12 |
| LOC100009 | 0.363205433  | 1.06657E-12 | 6.92107E-12 |
| DDR1      | 0.363147422  | 1.07607E-12 | 6.98043E-12 |
| MRPS25    | 0.36281191   | 1.13265E-12 | 7.34506E-12 |
| FBXO30    | -0.362793099 | 1.13591E-12 | 7.36379E-12 |
| C11orf73  | 0.362756751  | 1.14222E-12 | 7.40234E-12 |
| NDFIP2    | -0.362728575 | 1.14715E-12 | 7.43182E-12 |
| OSBPL5    | -0.362709201 | 1.15054E-12 | 7.4514E-12  |
| KIAA0947  | -0.362516656 | 1.18484E-12 | 7.671E-12   |
| ZAK       | -0.362483002 | 1.19093E-12 | 7.70796E-12 |
| ZNF330    | -0.362449422 | 1.19704E-12 | 7.745E-12   |
| SCN8A     | -0.36234083  | 1.21702E-12 | 7.87171E-12 |
| 43896     | -0.362302075 | 1.22423E-12 | 7.91576E-12 |

|           |              |             |             |
|-----------|--------------|-------------|-------------|
| EIF2B1    | 0.362257881  | 1.2325E-12  | 7.96665E-12 |
| RCBTB2    | -0.362080402 | 1.26627E-12 | 8.18227E-12 |
| KDM3B     | -0.362072149 | 1.26786E-12 | 8.18991E-12 |
| AMMECR1L  | -0.362039955 | 1.27409E-12 | 8.22748E-12 |
| HNRNPC    | 0.361939307  | 1.29376E-12 | 8.35178E-12 |
| ADIPOR2   | -0.361880638 | 1.30536E-12 | 8.42394E-12 |
| RABGAP1   | -0.361868778 | 1.30772E-12 | 8.43642E-12 |
| PPP1R16B  | -0.361855867 | 1.31029E-12 | 8.45027E-12 |
| LOC399959 | -0.361782537 | 1.32499E-12 | 8.54229E-12 |
| NUP85     | 0.361742788  | 1.33302E-12 | 8.59131E-12 |
| KIAA1644  | -0.361723797 | 1.33688E-12 | 8.61337E-12 |
| KIAA0415  | 0.361720562  | 1.33754E-12 | 8.61482E-12 |
| TWF1      | -0.361665844 | 1.34871E-12 | 8.68398E-12 |
| CCNG2     | -0.361616483 | 1.35887E-12 | 8.74656E-12 |
| LRRC32    | -0.361579238 | 1.36658E-12 | 8.79338E-12 |
| SLC35D2   | 0.361512655  | 1.38048E-12 | 8.87994E-12 |
| CDC14B    | -0.36143776  | 1.39628E-12 | 8.97866E-12 |
| NAMPT     | -0.361402991 | 1.40367E-12 | 9.02329E-12 |
| SEMA6D    | -0.361249369 | 1.4368E-12  | 9.23328E-12 |
| SFRS12    | -0.361206187 | 1.44625E-12 | 9.29101E-12 |
| ANKS3     | 0.361191193  | 1.44955E-12 | 9.30917E-12 |
| IMPG1     | -0.361125607 | 1.46405E-12 | 9.39927E-12 |
| USP45     | -0.361108325 | 1.46789E-12 | 9.42091E-12 |
| SLC12A4   | -0.361032096 | 1.48497E-12 | 9.52743E-12 |
| CTU2      | 0.36097456   | 1.49798E-12 | 9.60785E-12 |
| USP33     | -0.360837278 | 1.52949E-12 | 9.80678E-12 |
| TMEM208   | 0.360730206  | 1.55452E-12 | 9.96402E-12 |
| PPIL4     | -0.360714424 | 1.55824E-12 | 9.98467E-12 |
| ZFHX3     | -0.36060113  | 1.58522E-12 | 1.01543E-11 |
| NPTN      | -0.360508447 | 1.60762E-12 | 1.02945E-11 |
| SLFN5     | -0.360460162 | 1.61942E-12 | 1.03667E-11 |
| NDUFB6    | 0.360445532  | 1.62301E-12 | 1.03863E-11 |
| SF3A3     | 0.36043327   | 1.62603E-12 | 1.04023E-11 |
| IFI27L2   | 0.360411367  | 1.63143E-12 | 1.04335E-11 |
| KBTBD11   | -0.360407643 | 1.63235E-12 | 1.0436E-11  |
| B4GALT2   | 0.360378846  | 1.63948E-12 | 1.04782E-11 |
| PABPN1    | 0.360270404  | 1.6666E-12  | 1.06482E-11 |
| DHX16     | 0.360216138  | 1.68034E-12 | 1.07325E-11 |
| ABI3BP    | -0.360202532 | 1.6838E-12  | 1.07512E-11 |
| ATP5C1    | 0.36014522   | 1.69846E-12 | 1.08413E-11 |
| DBI       | 0.360059015  | 1.72074E-12 | 1.098E-11   |
| THRAP3    | -0.360025244 | 1.72955E-12 | 1.10327E-11 |
| FBXW2     | -0.360017618 | 1.73155E-12 | 1.10419E-11 |
| WDYHV1    | 0.35987261   | 1.76991E-12 | 1.12829E-11 |
| OSMR      | -0.359799086 | 1.78968E-12 | 1.14053E-11 |
| RAB5A     | -0.35968673  | 1.8203E-12  | 1.15967E-11 |

|           |              |             |             |
|-----------|--------------|-------------|-------------|
| HMCN1     | -0.359586536 | 1.84805E-12 | 1.17697E-11 |
| VEZT      | -0.359563854 | 1.85438E-12 | 1.18063E-11 |
| SFRS11    | -0.359402165 | 1.90018E-12 | 1.2094E-11  |
| GLI3      | -0.359385511 | 1.90496E-12 | 1.21205E-11 |
| PAN3      | -0.359322219 | 1.92323E-12 | 1.22329E-11 |
| ROR1      | -0.359271759 | 1.93792E-12 | 1.23224E-11 |
| GANC      | -0.359183714 | 1.96381E-12 | 1.2483E-11  |
| ARID2     | -0.359158449 | 1.9713E-12  | 1.25259E-11 |
| FKBP11    | 0.359156719  | 1.97182E-12 | 1.25259E-11 |
| ITGB3BP   | 0.359125579  | 1.98109E-12 | 1.25808E-11 |
| PDXDC1    | -0.359116522 | 1.9838E-12  | 1.2594E-11  |
| GOLGA2    | -0.359085921 | 1.99296E-12 | 1.26481E-11 |
| PCDHGC5   | -0.358989478 | 2.02213E-12 | 1.28292E-11 |
| H2AFJ     | 0.358974019  | 2.02684E-12 | 1.2855E-11  |
| SIK2      | -0.358941565 | 2.03677E-12 | 1.29138E-11 |
| CALCOCO1  | -0.358933411 | 2.03928E-12 | 1.29256E-11 |
| ZNF784    | 0.358852205  | 2.06436E-12 | 1.30804E-11 |
| RGPD6     | -0.35875124  | 2.09598E-12 | 1.32765E-11 |
| DHTKD1    | -0.358747677 | 2.0971E-12  | 1.32794E-11 |
| C14orf179 | 0.358658889  | 2.12531E-12 | 1.34537E-11 |
| RAB21     | -0.358618656 | 2.13821E-12 | 1.35311E-11 |
| AFAP1     | -0.35859526  | 2.14575E-12 | 1.35745E-11 |
| RMND5A    | -0.358542636 | 2.1628E-12  | 1.3678E-11  |
| ADCY3     | -0.358527213 | 2.16782E-12 | 1.37054E-11 |
| TMEM18    | 0.358489534  | 2.18013E-12 | 1.37789E-11 |
| CISD1     | 0.358439046  | 2.19675E-12 | 1.38795E-11 |
| RB1       | -0.358345261 | 2.22793E-12 | 1.40721E-11 |
| CWF19L1   | 0.358313927  | 2.23845E-12 | 1.4134E-11  |
| POLI      | -0.358265404 | 2.25483E-12 | 1.42329E-11 |
| PCDHGA7   | -0.358261345 | 2.2562E-12  | 1.42371E-11 |
| KLF9      | -0.358249289 | 2.26029E-12 | 1.42584E-11 |
| MDP1      | 0.358136483  | 2.29891E-12 | 1.44933E-11 |
| MBNL1     | -0.358136268 | 2.29899E-12 | 1.44933E-11 |
| MAPK6     | -0.358084842 | 2.31681E-12 | 1.4601E-11  |
| NAALADL2  | -0.358064483 | 2.3239E-12  | 1.46411E-11 |
| SATB1     | -0.358016246 | 2.34079E-12 | 1.47428E-11 |
| ZNF526    | 0.357916303  | 2.37617E-12 | 1.49609E-11 |
| OXSRI     | -0.357878669 | 2.38962E-12 | 1.50409E-11 |
| ERCC2     | 0.357811233  | 2.41392E-12 | 1.5189E-11  |
| SBNO2     | -0.357776953 | 2.42636E-12 | 1.52625E-11 |
| PSME1     | 0.357673518  | 2.46429E-12 | 1.54962E-11 |
| ING3      | -0.357575075 | 2.50092E-12 | 1.57216E-11 |
| TMEM149   | 0.357553843  | 2.5089E-12  | 1.57667E-11 |
| MBIP      | -0.357518235 | 2.52232E-12 | 1.5846E-11  |
| CCDC22    | 0.357485491  | 2.53472E-12 | 1.5919E-11  |
| ZNF713    | -0.357477553 | 2.53774E-12 | 1.59329E-11 |

|           |              |             |             |
|-----------|--------------|-------------|-------------|
| FGF7      | -0.357443848 | 2.55059E-12 | 1.60085E-11 |
| AP2M1     | 0.357403928  | 2.56589E-12 | 1.60994E-11 |
| FAM58A    | 0.357400816  | 2.56708E-12 | 1.61019E-11 |
| TEX264    | 0.357392079  | 2.57044E-12 | 1.61179E-11 |
| GTF2A2    | 0.357375316  | 2.5769E-12  | 1.61533E-11 |
| TRMT2A    | 0.35733263   | 2.59343E-12 | 1.62518E-11 |
| SIL1      | 0.357245095  | 2.62764E-12 | 1.6461E-11  |
| ZNF358    | 0.357236508  | 2.63102E-12 | 1.6477E-11  |
| MTIF3     | 0.357193104  | 2.64817E-12 | 1.65792E-11 |
| RPL19P12  | 0.35712811   | 2.67406E-12 | 1.6736E-11  |
| ETS2      | -0.357000967 | 2.72541E-12 | 1.7052E-11  |
| PTPN4     | -0.356890448 | 2.77083E-12 | 1.73307E-11 |
| ATP8B4    | -0.356886821 | 2.77233E-12 | 1.73347E-11 |
| MFN1      | -0.356881448 | 2.77456E-12 | 1.73432E-11 |
| FRK       | -0.3568656   | 2.78114E-12 | 1.73788E-11 |
| PCDHAC2   | -0.356784499 | 2.81506E-12 | 1.75853E-11 |
| ATF4      | 0.356726816  | 2.83943E-12 | 1.7732E-11  |
| KAT2A     | 0.356686784  | 2.85647E-12 | 1.78328E-11 |
| RSPO3     | -0.356576877 | 2.90375E-12 | 1.81223E-11 |
| C5orf51   | -0.356511679 | 2.93216E-12 | 1.82939E-11 |
| ANUBL1    | -0.356477499 | 2.94716E-12 | 1.83817E-11 |
| MYCT1     | -0.356471077 | 2.94999E-12 | 1.83936E-11 |
| CREB3L2   | -0.356451183 | 2.95876E-12 | 1.84425E-11 |
| LIMA1     | -0.356248881 | 3.04945E-12 | 1.90018E-11 |
| ATAD3B    | 0.35619562   | 3.07377E-12 | 1.91474E-11 |
| LRRC69    | 0.356163193  | 3.08868E-12 | 1.92342E-11 |
| NPR3      | -0.356114269 | 3.11129E-12 | 1.9369E-11  |
| CREBL2    | -0.356105733 | 3.11526E-12 | 1.93858E-11 |
| ENTPD7    | -0.356104259 | 3.11594E-12 | 1.93858E-11 |
| AFTPH     | -0.356055416 | 3.13871E-12 | 1.95214E-11 |
| ZNF704    | -0.356042222 | 3.14489E-12 | 1.95537E-11 |
| MEPCE     | 0.355965639  | 3.181E-12   | 1.9772E-11  |
| ZFYVE16   | -0.355871096 | 3.22613E-12 | 2.00463E-11 |
| HDAC11    | 0.355845098  | 3.23864E-12 | 2.01178E-11 |
| ACBD6     | 0.35577924   | 3.27057E-12 | 2.03098E-11 |
| ARID1A    | -0.355758933 | 3.28048E-12 | 2.03649E-11 |
| NCAPG     | 0.355540024  | 3.38914E-12 | 2.1033E-11  |
| EIF5B     | 0.355508013  | 3.40532E-12 | 2.11268E-11 |
| ANKHD1-EI | -0.355465347 | 3.42701E-12 | 2.12547E-11 |
| ELK1      | -0.355460805 | 3.42933E-12 | 2.12625E-11 |
| NFIX      | -0.355442231 | 3.43881E-12 | 2.13147E-11 |
| GNAO1     | -0.355387086 | 3.46714E-12 | 2.14835E-11 |
| MECOM     | -0.355380301 | 3.47064E-12 | 2.14985E-11 |
| CENPA     | 0.355276891  | 3.52442E-12 | 2.18249E-11 |
| FAM196B   | -0.355239462 | 3.54408E-12 | 2.19398E-11 |
| CLTB      | 0.355057282  | 3.64134E-12 | 2.25349E-11 |

|           |              |             |             |
|-----------|--------------|-------------|-------------|
| WDR60     | -0.355022    | 3.66047E-12 | 2.26463E-11 |
| PPP3R1    | -0.35489211  | 3.73177E-12 | 2.30802E-11 |
| EML1      | -0.354856429 | 3.75159E-12 | 2.31955E-11 |
| KLHL26    | -0.354841207 | 3.76007E-12 | 2.32408E-11 |
| CRIP1     | 0.354813043  | 3.77583E-12 | 2.33309E-11 |
| STAG3L3   | -0.354726416 | 3.82468E-12 | 2.36255E-11 |
| PARP11    | -0.354703978 | 3.83744E-12 | 2.36969E-11 |
| RGPD1     | -0.354694568 | 3.8428E-12  | 2.37227E-11 |
| MED23     | -0.354634485 | 3.8772E-12  | 2.39276E-11 |
| MED30     | 0.354630787  | 3.87933E-12 | 2.39333E-11 |
| CSGALNACT | -0.354546029 | 3.9284E-12  | 2.42286E-11 |
| NPBWR1    | -0.354520318 | 3.94341E-12 | 2.43136E-11 |
| TMEM81    | 0.354466076  | 3.97525E-12 | 2.45023E-11 |
| C5orf23   | -0.354425906 | 3.99899E-12 | 2.46411E-11 |
| MPDU1     | 0.354381609  | 4.02533E-12 | 2.47957E-11 |
| FAM104B   | 0.354343988  | 4.04784E-12 | 2.49266E-11 |
| P2RX4     | 0.354325086  | 4.05919E-12 | 2.49888E-11 |
| NCOA4     | -0.35428054  | 4.08607E-12 | 2.51465E-11 |
| AFP       | 0.35427483   | 4.08953E-12 | 2.516E-11   |
| SLC2A13   | -0.354226242 | 4.11907E-12 | 2.53339E-11 |
| C5orf45   | 0.354203347  | 4.13306E-12 | 2.54118E-11 |
| B9D1      | 0.354201363  | 4.13427E-12 | 2.54118E-11 |
| TLL1      | -0.354180796 | 4.14689E-12 | 2.54814E-11 |
| THUMPD1   | -0.354151044 | 4.1652E-12  | 2.5586E-11  |
| GAB1      | -0.354104772 | 4.19383E-12 | 2.5754E-11  |
| SNX6      | -0.354073713 | 4.21316E-12 | 2.58647E-11 |
| MTUS1     | -0.354043555 | 4.23202E-12 | 2.59724E-11 |
| PPIP5K1   | -0.354015059 | 4.2499E-12  | 2.60742E-11 |
| NFASC     | -0.354009636 | 4.25332E-12 | 2.60871E-11 |
| NPC2      | 0.353988048  | 4.26693E-12 | 2.61625E-11 |
| SERF1A    | 0.353879448  | 4.33605E-12 | 2.65781E-11 |
| FLI1      | -0.353866008 | 4.34468E-12 | 2.66229E-11 |
| STIP1     | 0.353770982  | 4.40618E-12 | 2.69914E-11 |
| LUC7L2    | -0.35374634  | 4.42226E-12 | 2.70816E-11 |
| CCDC126   | -0.353740049 | 4.42638E-12 | 2.70985E-11 |
| PDS5B     | -0.353628469 | 4.5E-12     | 2.75407E-11 |
| LOC728554 | 0.353533703  | 4.56347E-12 | 2.79206E-11 |
| TMEM222   | 0.353523155  | 4.57058E-12 | 2.79555E-11 |
| CDYL2     | -0.35348466  | 4.59665E-12 | 2.81063E-11 |
| C8orf44   | 0.35347864   | 4.60074E-12 | 2.81227E-11 |
| NSD1      | -0.353322336 | 4.70819E-12 | 2.87706E-11 |
| KCTD12    | -0.353264342 | 4.74867E-12 | 2.90091E-11 |
| MSRB3     | -0.353183114 | 4.80595E-12 | 2.935E-11   |
| LMLN      | -0.353146015 | 4.83233E-12 | 2.95021E-11 |
| DYNC1LI2  | -0.35310352  | 4.86272E-12 | 2.96786E-11 |
| SLC30A9   | -0.353081251 | 4.87873E-12 | 2.97671E-11 |

|           |              |             |             |
|-----------|--------------|-------------|-------------|
| UBE2L3    | 0.353071506  | 4.88574E-12 | 2.98008E-11 |
| FBXL5     | -0.353031259 | 4.91484E-12 | 2.99691E-11 |
| EXOSC2    | 0.353021201  | 4.92213E-12 | 3.00044E-11 |
| CXXC5     | -0.352966079 | 4.96231E-12 | 3.024E-11   |
| INS-IGF2  | -0.352931767 | 4.98748E-12 | 3.03841E-11 |
| IKZF2     | -0.352925967 | 4.99175E-12 | 3.04008E-11 |
| SMEK1     | -0.352861495 | 5.03942E-12 | 3.06818E-11 |
| SRP54     | -0.352754156 | 5.11978E-12 | 3.11615E-11 |
| LOC93622  | 0.352698714  | 5.16177E-12 | 3.14029E-11 |
| LEPRE1    | 0.352697643  | 5.16259E-12 | 3.14029E-11 |
| TRIM4     | -0.352695304 | 5.16437E-12 | 3.14041E-11 |
| LAMA2     | -0.35255076  | 5.27549E-12 | 3.207E-11   |
| PNN       | -0.352504057 | 5.31189E-12 | 3.22815E-11 |
| ABO       | -0.352499831 | 5.3152E-12  | 3.22917E-11 |
| METTL2A   | 0.35248857   | 5.32402E-12 | 3.23354E-11 |
| TMEM161B  | -0.352474969 | 5.33469E-12 | 3.23904E-11 |
| RALGAPA1  | -0.352143139 | 5.60159E-12 | 3.40005E-11 |
| DIP2B     | -0.352126776 | 5.61509E-12 | 3.40721E-11 |
| FAM125A   | 0.352124282  | 5.61715E-12 | 3.40742E-11 |
| ZNF770    | -0.35210098  | 5.63643E-12 | 3.41807E-11 |
| MCTS1     | 0.352086026  | 5.64883E-12 | 3.42455E-11 |
| THAP4     | 0.352058411  | 5.67181E-12 | 3.43743E-11 |
| WDR36     | -0.352055647 | 5.67411E-12 | 3.43778E-11 |
| TBC1D22A  | 0.351952877  | 5.76046E-12 | 3.48904E-11 |
| FAF1      | 0.351950677  | 5.76233E-12 | 3.48911E-11 |
| DUSP28    | 0.351909463  | 5.79733E-12 | 3.50923E-11 |
| SNX11     | 0.351884649  | 5.8185E-12  | 3.52098E-11 |
| LOC647288 | -0.351866838 | 5.83374E-12 | 3.52913E-11 |
| CDK7      | 0.351764002  | 5.92252E-12 | 3.58175E-11 |
| MAMSTR    | 0.351735395  | 5.94745E-12 | 3.59573E-11 |
| PUS7L     | -0.351728222 | 5.95372E-12 | 3.59843E-11 |
| KAL1      | -0.351707982 | 5.97144E-12 | 3.60804E-11 |
| B4GALT3   | 0.351506012  | 6.15109E-12 | 3.71546E-11 |
| C1orf56   | 0.351495369  | 6.1607E-12  | 3.72014E-11 |
| GUK1      | 0.351358336  | 6.28577E-12 | 3.79452E-11 |
| DLG4      | -0.351340789 | 6.30196E-12 | 3.80314E-11 |
| PGR       | -0.351336881 | 6.30557E-12 | 3.80417E-11 |
| SETD1B    | -0.351289737 | 6.34931E-12 | 3.82939E-11 |
| PARK7     | 0.351256088  | 6.3807E-12  | 3.84716E-11 |
| ATP8B1    | -0.351253984 | 6.38267E-12 | 3.84718E-11 |
| DUSP13    | 0.351244589  | 6.39147E-12 | 3.85132E-11 |
| VPS37A    | -0.351240639 | 6.39517E-12 | 3.85197E-11 |
| FBLN2     | -0.351239315 | 6.39641E-12 | 3.85197E-11 |
| PION      | -0.351194906 | 6.43818E-12 | 3.87595E-11 |
| LRRC3     | -0.351153436 | 6.47742E-12 | 3.89839E-11 |
| MDM1      | -0.351112187 | 6.51669E-12 | 3.92084E-11 |



|           |              |             |             |
|-----------|--------------|-------------|-------------|
| ZMYM6     | -0.351092112 | 6.53588E-12 | 3.9312E-11  |
| PABPC4L   | -0.351066128 | 6.5608E-12  | 3.945E-11   |
| TMEM131   | -0.351048716 | 6.57756E-12 | 3.95388E-11 |
| FAM135A   | -0.350915829 | 6.70681E-12 | 4.03036E-11 |
| SNIP1     | -0.350785156 | 6.83632E-12 | 4.10695E-11 |
| THAP11    | 0.350779837  | 6.84165E-12 | 4.10891E-11 |
| NOC2L     | 0.350763154  | 6.85837E-12 | 4.11771E-11 |
| FAM199X   | -0.350706766 | 6.91518E-12 | 4.15057E-11 |
| RBM4      | 0.35053297   | 7.0932E-12  | 4.25614E-11 |
| DPH5      | 0.350381852  | 7.25163E-12 | 4.34988E-11 |
| PTPRJ     | -0.350326862 | 7.31012E-12 | 4.38365E-11 |
| KPNA1     | -0.350282778 | 7.35735E-12 | 4.41065E-11 |
| GPR89C    | 0.350247709  | 7.39514E-12 | 4.43196E-11 |
| NEDD4     | -0.350207182 | 7.43904E-12 | 4.45693E-11 |
| EFCAB6    | -0.350150412 | 7.50096E-12 | 4.49268E-11 |
| RAB12     | -0.350136338 | 7.51639E-12 | 4.50057E-11 |
| SELK      | 0.350128271  | 7.52525E-12 | 4.50452E-11 |
| PDF       | 0.350124954  | 7.5289E-12  | 4.50535E-11 |
| RFT1      | 0.350113029  | 7.54201E-12 | 4.51184E-11 |
| OPHN1     | -0.35002367  | 7.64103E-12 | 4.5697E-11  |
| RAE1      | 0.350009878  | 7.65643E-12 | 4.57754E-11 |
| CTCF      | -0.35000666  | 7.66002E-12 | 4.57831E-11 |
| PCDHB8    | -0.349996878 | 7.67097E-12 | 4.58348E-11 |
| KDM2A     | -0.349983058 | 7.68645E-12 | 4.59135E-11 |
| PREX1     | -0.349980622 | 7.68918E-12 | 4.59161E-11 |
| FOXJ3     | -0.349961916 | 7.7102E-12  | 4.60278E-11 |
| ANKRD26   | -0.349920934 | 7.75644E-12 | 4.62899E-11 |
| FARSA     | 0.349881098  | 7.80165E-12 | 4.65458E-11 |
| CXorf26   | 0.349697302  | 8.01357E-12 | 4.77958E-11 |
| KCNIP4    | -0.349523954 | 8.21858E-12 | 4.90039E-11 |
| LOC100125 | 0.34943881   | 8.32115E-12 | 4.96006E-11 |
| COX19     | 0.34939691   | 8.37208E-12 | 4.98893E-11 |
| UPRT      | -0.34937452  | 8.39942E-12 | 5.00372E-11 |
| ADAMTS4   | -0.349359043 | 8.41837E-12 | 5.01351E-11 |
| APTX      | 0.349343456  | 8.43749E-12 | 5.0234E-11  |
| MID2      | -0.349330219 | 8.45377E-12 | 5.03158E-11 |
| EFNA3     | 0.349277961  | 8.51832E-12 | 5.06849E-11 |
| PSTK      | 0.349261232  | 8.53909E-12 | 5.07885E-11 |
| STYXL1    | 0.349259831  | 8.54083E-12 | 5.07885E-11 |
| ZBTB7A    | -0.34910258  | 8.73851E-12 | 5.19485E-11 |
| PLEKHA5   | -0.349093366 | 8.75023E-12 | 5.20026E-11 |
| NDUFB5    | 0.349059798  | 8.79306E-12 | 5.22416E-11 |
| LGR4      | -0.349050944 | 8.80439E-12 | 5.22933E-11 |
| LTBP4     | -0.349018004 | 8.84667E-12 | 5.25287E-11 |
| C16orf61  | 0.348974996  | 8.90217E-12 | 5.28425E-11 |
| FOXC2     | -0.348855153 | 9.05862E-12 | 5.37552E-11 |

|           |              |             |             |
|-----------|--------------|-------------|-------------|
| PTPRE     | -0.348842535 | 9.07524E-12 | 5.38378E-11 |
| HRCT1     | 0.348750641  | 9.19724E-12 | 5.45453E-11 |
| SLC25A3   | 0.348719043  | 9.23956E-12 | 5.47799E-11 |
| ANGPTL1   | -0.3486006   | 9.39988E-12 | 5.57138E-11 |
| CDC123    | 0.348576818  | 9.43239E-12 | 5.58899E-11 |
| ALS2      | -0.348499408 | 9.53899E-12 | 5.65048E-11 |
| CCDC52    | -0.34842038  | 9.64903E-12 | 5.71396E-11 |
| SUN1      | -0.348414631 | 9.65709E-12 | 5.71703E-11 |
| LOC100129 | -0.348378061 | 9.70847E-12 | 5.74574E-11 |
| KAZ       | -0.348355663 | 9.74007E-12 | 5.76273E-11 |
| GPN2      | 0.348280527  | 9.84681E-12 | 5.82415E-11 |
| TOP1P1    | -0.348268007 | 9.86471E-12 | 5.83301E-11 |
| NAPEPLD   | -0.348193554 | 9.97179E-12 | 5.89458E-11 |
| MAGI2     | -0.34816925  | 1.0007E-11  | 5.91363E-11 |
| TXN2      | 0.348077111  | 1.01416E-11 | 5.99137E-11 |
| ARHGAP24  | -0.348074639 | 1.01452E-11 | 5.99174E-11 |
| APAF1     | -0.348000772 | 1.02544E-11 | 6.05443E-11 |
| C6orf155  | -0.34792347  | 1.03699E-11 | 6.1208E-11  |
| CRNKL1    | 0.347899341  | 1.04062E-11 | 6.14041E-11 |
| GPX1      | 0.347894368  | 1.04137E-11 | 6.14302E-11 |
| RWDD1     | 0.347882997  | 1.04308E-11 | 6.15132E-11 |
| BNC2      | -0.347867218 | 1.04547E-11 | 6.16357E-11 |
| PCDHGB1   | -0.347794758 | 1.0565E-11  | 6.22674E-11 |
| TAF5L     | -0.347776967 | 1.05922E-11 | 6.24096E-11 |
| EMILIN3   | 0.347763342  | 1.06131E-11 | 6.25143E-11 |
| LOC388588 | 0.347709955  | 1.06955E-11 | 6.29807E-11 |
| TMUB1     | 0.347615606  | 1.08425E-11 | 6.38277E-11 |
| NIN       | -0.347561239 | 1.09282E-11 | 6.43128E-11 |
| FSTL1     | -0.347518844 | 1.09954E-11 | 6.46893E-11 |
| SUN2      | -0.347447224 | 1.11099E-11 | 6.53436E-11 |
| KIAA1161  | -0.347412819 | 1.11653E-11 | 6.56501E-11 |
| PTRH1     | 0.347408996  | 1.11715E-11 | 6.5667E-11  |
| XCR1      | -0.347369713 | 1.12351E-11 | 6.60047E-11 |
| STAG3L1   | -0.347369433 | 1.12356E-11 | 6.60047E-11 |
| TMEM233   | -0.347361844 | 1.12479E-11 | 6.60577E-11 |
| ZNF333    | -0.347330265 | 1.12994E-11 | 6.63404E-11 |
| RANBP10   | -0.347325895 | 1.13065E-11 | 6.63628E-11 |
| MBTPS1    | -0.34729974  | 1.13493E-11 | 6.65945E-11 |
| FNIP1     | -0.347294265 | 1.13583E-11 | 6.66276E-11 |
| TRAPPC4   | 0.347265295  | 1.1406E-11  | 6.68874E-11 |
| ZNF579    | 0.347202924  | 1.15092E-11 | 6.74732E-11 |
| AGK       | -0.347171018 | 1.15624E-11 | 6.7765E-11  |
| TMEM26    | -0.34716531  | 1.15719E-11 | 6.78009E-11 |
| RPUSD2    | 0.347127689  | 1.1635E-11  | 6.81504E-11 |
| AIMP1     | 0.347125281  | 1.16391E-11 | 6.8154E-11  |
| RASSF1    | 0.347098695  | 1.16838E-11 | 6.83962E-11 |

|           |              |             |             |
|-----------|--------------|-------------|-------------|
| TENC1     | -0.347057129 | 1.17542E-11 | 6.87878E-11 |
| CDC34     | 0.347040412  | 1.17826E-11 | 6.89338E-11 |
| USP24     | -0.346928057 | 1.19753E-11 | 7.00405E-11 |
| SDHD      | -0.34680486  | 1.21901E-11 | 7.1276E-11  |
| MRPS18C   | 0.346799244  | 1.22E-11    | 7.13129E-11 |
| PCDHGC4   | -0.346738311 | 1.23077E-11 | 7.19214E-11 |
| SLC31A2   | -0.346733847 | 1.23156E-11 | 7.19466E-11 |
| NCOA6     | -0.346705033 | 1.23669E-11 | 7.22251E-11 |
| WWTR1     | -0.346666239 | 1.24363E-11 | 7.2609E-11  |
| CDC42BPA  | -0.346570262 | 1.26096E-11 | 7.35993E-11 |
| TMEM154   | -0.346513681 | 1.27129E-11 | 7.41803E-11 |
| SFRS14    | -0.346505677 | 1.27276E-11 | 7.42442E-11 |
| WDR53     | 0.346480307  | 1.27742E-11 | 7.44943E-11 |
| CTSO      | -0.346451692 | 1.2827E-11  | 7.47803E-11 |
| FAR2      | -0.346447613 | 1.28345E-11 | 7.48023E-11 |
| MRPL41    | 0.346364352  | 1.29894E-11 | 7.5683E-11  |
| CCDC86    | 0.346351697  | 1.30131E-11 | 7.57989E-11 |
| MBTPS2    | -0.34629688  | 1.31163E-11 | 7.63774E-11 |
| TM7SF3    | -0.346291845 | 1.31258E-11 | 7.64105E-11 |
| KLRA1     | -0.346207371 | 1.32864E-11 | 7.7323E-11  |
| C11orf68  | 0.346129572  | 1.34361E-11 | 7.81711E-11 |
| ALDH9A1   | -0.346071445 | 1.3549E-11  | 7.87931E-11 |
| QTRT1     | 0.34607045   | 1.35509E-11 | 7.87931E-11 |
| TEX2      | -0.34601857  | 1.36524E-11 | 7.93603E-11 |
| GOLGA6L10 | -0.345901821 | 1.38837E-11 | 8.06809E-11 |
| PER3      | -0.345892314 | 1.39027E-11 | 8.07677E-11 |
| IQGAP1    | -0.345828958 | 1.40299E-11 | 8.14831E-11 |
| AARS2     | 0.345825744  | 1.40364E-11 | 8.1497E-11  |
| RQCD1     | -0.345763114 | 1.41634E-11 | 8.22102E-11 |
| KLF11     | -0.345731964 | 1.42269E-11 | 8.25551E-11 |
| SMYD3     | 0.345727518  | 1.4236E-11  | 8.25838E-11 |
| KCTD20    | -0.345719457 | 1.42525E-11 | 8.26555E-11 |
| TSPAN18   | -0.345702694 | 1.42869E-11 | 8.28307E-11 |
| PODXL     | -0.345699989 | 1.42925E-11 | 8.28388E-11 |
| CCDC77    | 0.345651721  | 1.43919E-11 | 8.33912E-11 |
| ZNF280D   | -0.345556726 | 1.45897E-11 | 8.45125E-11 |
| ZNF440    | -0.345537346 | 1.46304E-11 | 8.47235E-11 |
| RAI2      | -0.34549763  | 1.47141E-11 | 8.51834E-11 |
| IGBP1     | 0.345445678  | 1.48243E-11 | 8.57963E-11 |
| FBXW4     | 0.345369045  | 1.49883E-11 | 8.67203E-11 |
| AMOTL1    | -0.3453367   | 1.5058E-11  | 8.70986E-11 |
| THYN1     | 0.345182759  | 1.53943E-11 | 8.90181E-11 |
| C22orf30  | -0.345099909 | 1.55784E-11 | 9.00561E-11 |
| ATMIN     | -0.345057536 | 1.56733E-11 | 9.05788E-11 |
| MYO6      | -0.345025309 | 1.57459E-11 | 9.09719E-11 |
| IER3IP1   | 0.345020549  | 1.57567E-11 | 9.10076E-11 |

|          |              |             |             |
|----------|--------------|-------------|-------------|
| ALKBH7   | 0.34475336   | 1.63717E-11 | 9.45324E-11 |
| CXorf23  | -0.344693064 | 1.65137E-11 | 9.53247E-11 |
| PHF6     | -0.344677217 | 1.65512E-11 | 9.55135E-11 |
| CDC45    | 0.344670596  | 1.65669E-11 | 9.55764E-11 |
| PTPN1    | -0.344666179 | 1.65774E-11 | 9.56092E-11 |
| LPAR4    | -0.344633776 | 1.66545E-11 | 9.6026E-11  |
| KATNAL1  | -0.344622039 | 1.66825E-11 | 9.61597E-11 |
| PDS5A    | -0.344617035 | 1.66944E-11 | 9.62008E-11 |
| CCDC134  | 0.344529447  | 1.69051E-11 | 9.73863E-11 |
| RBMS2    | -0.344525447 | 1.69148E-11 | 9.74139E-11 |
| APOBEC2  | 0.344509268  | 1.6954E-11  | 9.76115E-11 |
| ARIH1    | -0.344501297 | 1.69733E-11 | 9.76947E-11 |
| EDC3     | 0.344496403  | 1.69852E-11 | 9.77349E-11 |
| RCAN1    | -0.344471427 | 1.7046E-11  | 9.80565E-11 |
| BMS1P4   | -0.344404668 | 1.72096E-11 | 9.8969E-11  |
| RNF220   | 0.344376431  | 1.72793E-11 | 9.93409E-11 |
| PTPRN2   | -0.344296077 | 1.7479E-11  | 1.0046E-10  |
| CRLF3    | -0.3442638   | 1.75599E-11 | 1.00896E-10 |
| PARP4    | -0.344177528 | 1.77778E-11 | 1.02119E-10 |
| MKI67IP  | 0.344164787  | 1.78102E-11 | 1.02275E-10 |
| TTC33    | -0.34414552  | 1.78593E-11 | 1.02528E-10 |
| FAM21B   | 0.344029702  | 1.81574E-11 | 1.04209E-10 |
| TMEM120A | 0.344025242  | 1.81689E-11 | 1.04245E-10 |
| PBX3     | -0.344021182 | 1.81795E-11 | 1.04275E-10 |
| SUGT1L1  | -0.343989249 | 1.82626E-11 | 1.04722E-10 |
| SFRS15   | -0.343972197 | 1.83071E-11 | 1.04947E-10 |
| PDK4     | -0.343858848 | 1.86059E-11 | 1.06629E-10 |
| ZBTB38   | -0.343832454 | 1.86761E-11 | 1.07001E-10 |
| MSTO1    | 0.343767833  | 1.88492E-11 | 1.07962E-10 |
| NMD3     | -0.343745278 | 1.891E-11   | 1.08279E-10 |
| POLDIP2  | 0.343679369  | 1.90887E-11 | 1.0927E-10  |
| TAB3     | -0.343670715 | 1.91123E-11 | 1.09346E-10 |
| CRTC3    | -0.343670486 | 1.91129E-11 | 1.09346E-10 |
| SSPO     | -0.343660438 | 1.91403E-11 | 1.09472E-10 |
| ING5     | 0.343642538  | 1.91893E-11 | 1.0972E-10  |
| PTPN13   | -0.343633202 | 1.92149E-11 | 1.09835E-10 |
| CNTN3    | -0.343626541 | 1.92331E-11 | 1.09908E-10 |
| ZNF587   | -0.343484596 | 1.96265E-11 | 1.12123E-10 |
| GPM6A    | -0.343453588 | 1.97134E-11 | 1.12588E-10 |
| PALM2    | -0.343395187 | 1.98783E-11 | 1.13496E-10 |
| GRAMD1C  | -0.343347987 | 2.00124E-11 | 1.1423E-10  |
| LAMA5    | -0.343234936 | 2.03374E-11 | 1.16052E-10 |
| ZNF319   | -0.343167684 | 2.05332E-11 | 1.17135E-10 |
| C19orf61 | 0.343122291  | 2.06664E-11 | 1.17861E-10 |
| RFX7     | -0.343112643 | 2.06948E-11 | 1.17989E-10 |
| TTPA     | -0.34309737  | 2.07398E-11 | 1.18212E-10 |

|           |              |             |             |
|-----------|--------------|-------------|-------------|
| BRD4      | -0.343013229 | 2.09898E-11 | 1.19603E-10 |
| FHL1      | -0.343007563 | 2.10067E-11 | 1.19665E-10 |
| METTL12   | 0.342977663  | 2.10963E-11 | 1.20141E-10 |
| ELFN1     | -0.342935047 | 2.12247E-11 | 1.20837E-10 |
| NRP2      | -0.342889855 | 2.13616E-11 | 1.21582E-10 |
| DMTF1     | -0.342792933 | 2.16582E-11 | 1.23235E-10 |
| CLN6      | 0.342769303  | 2.17311E-11 | 1.23615E-10 |
| CLMN      | -0.342764815 | 2.1745E-11  | 1.23658E-10 |
| RNASEH2B  | 0.342753552  | 2.17798E-11 | 1.23821E-10 |
| CSNK1G3   | -0.342680887 | 2.20061E-11 | 1.25072E-10 |
| SLC38A6   | 0.342618597  | 2.22018E-11 | 1.26148E-10 |
| TMEM127   | -0.342519706 | 2.25161E-11 | 1.27897E-10 |
| TXNRD2    | 0.342460485  | 2.27063E-11 | 1.28941E-10 |
| WHSC1L1   | -0.342356175 | 2.30453E-11 | 1.30829E-10 |
| SEMA5A    | -0.34228703  | 2.32727E-11 | 1.32082E-10 |
| CAMTA2    | -0.342227326 | 2.34708E-11 | 1.33168E-10 |
| FBXL6     | 0.342196447  | 2.35739E-11 | 1.33715E-10 |
| LDHAL6B   | -0.342183631 | 2.36168E-11 | 1.3392E-10  |
| ZRANB3    | -0.342171902 | 2.36561E-11 | 1.34105E-10 |
| GNG12     | -0.34214201  | 2.37567E-11 | 1.34637E-10 |
| RNF19A    | -0.341974795 | 2.4327E-11  | 1.3783E-10  |
| COG3      | -0.341954404 | 2.43975E-11 | 1.3819E-10  |
| CD46      | -0.341915562 | 2.45322E-11 | 1.38914E-10 |
| NEURL1B   | -0.341898331 | 2.45922E-11 | 1.39214E-10 |
| NHLRC1    | 0.341879413  | 2.46583E-11 | 1.39548E-10 |
| AMOTL2    | -0.341817486 | 2.48757E-11 | 1.40738E-10 |
| DSCR9     | 0.341776457  | 2.50208E-11 | 1.41519E-10 |
| PLA2R1    | -0.341748302 | 2.51208E-11 | 1.42045E-10 |
| PCDHGA2   | -0.341595065 | 2.56721E-11 | 1.45121E-10 |
| PAPPA     | -0.341590316 | 2.56894E-11 | 1.45177E-10 |
| CDKAL1    | 0.341563889  | 2.57857E-11 | 1.4568E-10  |
| SLC30A7   | -0.341545606 | 2.58526E-11 | 1.46016E-10 |
| TMEM186   | 0.341483578  | 2.60806E-11 | 1.47263E-10 |
| ITGA10    | -0.341470149 | 2.61303E-11 | 1.47501E-10 |
| CDK12     | -0.341451233 | 2.62003E-11 | 1.47855E-10 |
| FASTK     | 0.341428755  | 2.62838E-11 | 1.48284E-10 |
| NCRNA0011 | 0.34140555   | 2.63703E-11 | 1.48713E-10 |
| FBXO28    | -0.341404356 | 2.63748E-11 | 1.48713E-10 |
| JDP2      | -0.341397824 | 2.63992E-11 | 1.48808E-10 |
| MYO1E     | -0.341383613 | 2.64523E-11 | 1.49066E-10 |
| ZNF561    | -0.341377983 | 2.64734E-11 | 1.49142E-10 |
| SURF1     | 0.341334032  | 2.66386E-11 | 1.5003E-10  |
| KDM4C     | -0.341324571 | 2.66742E-11 | 1.50189E-10 |
| PCBP4     | 0.341291521  | 2.67993E-11 | 1.5085E-10  |
| DIRAS3    | -0.341266768 | 2.68933E-11 | 1.51336E-10 |
| PHKG1     | -0.341241564 | 2.69893E-11 | 1.51834E-10 |

|           |              |             |             |
|-----------|--------------|-------------|-------------|
| AHSA1     | 0.341163426  | 2.72893E-11 | 1.53478E-10 |
| NUP98     | -0.340945669 | 2.81423E-11 | 1.58231E-10 |
| SIN3B     | -0.340891344 | 2.83592E-11 | 1.59405E-10 |
| ZNF296    | 0.340836839  | 2.85784E-11 | 1.60592E-10 |
| ARHGEF9   | -0.340792365 | 2.87585E-11 | 1.61558E-10 |
| ISOC2     | 0.34078515   | 2.87878E-11 | 1.61678E-10 |
| PNMA2     | -0.340732696 | 2.90018E-11 | 1.62834E-10 |
| HFE       | -0.340727708 | 2.90222E-11 | 1.62902E-10 |
| COBLL1    | -0.340679533 | 2.92203E-11 | 1.63968E-10 |
| SPAG9     | -0.340619231 | 2.94701E-11 | 1.65323E-10 |
| APOM      | 0.340578684  | 2.96392E-11 | 1.66225E-10 |
| PRICKLE1  | -0.340557374 | 2.97285E-11 | 1.66679E-10 |
| THIL      | 0.340499776  | 2.99711E-11 | 1.67991E-10 |
| C9orf7    | 0.340467969  | 3.01058E-11 | 1.68699E-10 |
| GNG5      | 0.340464259  | 3.01216E-11 | 1.6874E-10  |
| GMDS      | 0.34040121   | 3.03907E-11 | 1.702E-10   |
| ATP7A     | -0.340363536 | 3.05526E-11 | 1.71058E-10 |
| STARD8    | -0.340354299 | 3.05924E-11 | 1.71233E-10 |
| HTR7P1    | -0.340278349 | 3.09217E-11 | 1.73028E-10 |
| NRP1      | -0.340242722 | 3.10774E-11 | 1.7385E-10  |
| BICD1     | -0.340231844 | 3.11251E-11 | 1.74068E-10 |
| WDFY1     | -0.340206043 | 3.12385E-11 | 1.74653E-10 |
| FKTN      | -0.340171881 | 3.13892E-11 | 1.75447E-10 |
| CNNM4     | -0.340143304 | 3.15159E-11 | 1.76105E-10 |
| OXR1      | -0.340120246 | 3.16184E-11 | 1.76629E-10 |
| SNX8      | 0.340115503  | 3.16396E-11 | 1.76697E-10 |
| DUS2L     | 0.340090916  | 3.17493E-11 | 1.7726E-10  |
| ZRANB1    | -0.340082294 | 3.17879E-11 | 1.77426E-10 |
| LOC285593 | -0.340014243 | 3.20941E-11 | 1.79085E-10 |
| RNPS1     | 0.339999385  | 3.21613E-11 | 1.7941E-10  |
| PIPSL     | 0.33998864   | 3.221E-11   | 1.79631E-10 |
| ABHD13    | -0.339957967 | 3.23494E-11 | 1.80358E-10 |
| FKBP15    | -0.339935931 | 3.245E-11   | 1.80868E-10 |
| CDC25A    | 0.339891932  | 3.26516E-11 | 1.81941E-10 |
| DDIT3     | 0.339840942  | 3.28868E-11 | 1.83178E-10 |
| LOC728640 | -0.339839811 | 3.2892E-11  | 1.83178E-10 |
| TMEM100   | -0.339835557 | 3.29117E-11 | 1.83236E-10 |
| RNF103    | -0.339831697 | 3.29296E-11 | 1.83285E-10 |
| VAMP5     | 0.339785886  | 3.31426E-11 | 1.84419E-10 |
| CBLN3     | -0.339782744 | 3.31572E-11 | 1.84449E-10 |
| ZNF616    | -0.339670804 | 3.36836E-11 | 1.87324E-10 |
| NR2F6     | 0.339620133  | 3.39245E-11 | 1.88611E-10 |
| YBX1      | 0.339583521  | 3.40996E-11 | 1.89532E-10 |
| NUPR1     | 0.339503873  | 3.44836E-11 | 1.91613E-10 |
| PL-5283   | 0.339431528  | 3.4836E-11  | 1.93517E-10 |
| APBB2     | -0.339412567 | 3.4929E-11  | 1.9398E-10  |

|           |              |             |             |
|-----------|--------------|-------------|-------------|
| PPP2R3B   | 0.33940295   | 3.49762E-11 | 1.94188E-10 |
| ALG14     | 0.339361648  | 3.51798E-11 | 1.95264E-10 |
| C2orf7    | 0.339350271  | 3.52361E-11 | 1.95522E-10 |
| STEAP4    | -0.339338472 | 3.52946E-11 | 1.95791E-10 |
| CCDC144B  | -0.33925637  | 3.5704E-11  | 1.98007E-10 |
| TNFSF13   | -0.33924423  | 3.57649E-11 | 1.9829E-10  |
| BVES      | -0.339239516 | 3.57886E-11 | 1.98366E-10 |
| BMI1      | -0.339185974 | 3.60587E-11 | 1.99808E-10 |
| PCYT2     | 0.339169376  | 3.61428E-11 | 2.00218E-10 |
| RBM8A     | 0.339107942  | 3.64559E-11 | 2.01896E-10 |
| SLC33A1   | -0.338994558 | 3.70407E-11 | 2.05078E-10 |
| ZNF180    | -0.338960406 | 3.72186E-11 | 2.06006E-10 |
| PEF1      | 0.338914233  | 3.74605E-11 | 2.07287E-10 |
| MED12     | -0.338911707 | 3.74738E-11 | 2.07303E-10 |
| SRF       | 0.338902994  | 3.75196E-11 | 2.07499E-10 |
| RNF187    | 0.338891673  | 3.75792E-11 | 2.07771E-10 |
| RAB8B     | -0.338862617 | 3.77327E-11 | 2.08561E-10 |
| MUTYH     | 0.338837918  | 3.78636E-11 | 2.09227E-10 |
| CDK5      | 0.338831397  | 3.78982E-11 | 2.0936E-10  |
| SHROOM3   | -0.338813959 | 3.7991E-11  | 2.09815E-10 |
| ZWINT     | 0.338809385  | 3.80154E-11 | 2.09891E-10 |
| GPR124    | -0.338779873 | 3.81731E-11 | 2.10668E-10 |
| ATP6V0C   | 0.338779097  | 3.81772E-11 | 2.10668E-10 |
| INO80B    | 0.338775047  | 3.81989E-11 | 2.10729E-10 |
| SAMD9L    | -0.33871601  | 3.85164E-11 | 2.12421E-10 |
| NDC80     | 0.338685462  | 3.86816E-11 | 2.13274E-10 |
| SUGT1     | 0.338659416  | 3.88231E-11 | 2.13995E-10 |
| SEC22B    | -0.338617634 | 3.90511E-11 | 2.15192E-10 |
| CYB5D1    | -0.338470679 | 3.98634E-11 | 2.19607E-10 |
| SCN7A     | -0.338455657 | 3.99474E-11 | 2.20009E-10 |
| TRIM14    | -0.338453667 | 3.99585E-11 | 2.20009E-10 |
| ATPIF1    | 0.338412021  | 4.01922E-11 | 2.21235E-10 |
| TMEM161A  | 0.338404296  | 4.02357E-11 | 2.21413E-10 |
| CSF1      | -0.3383868   | 4.03344E-11 | 2.21895E-10 |
| C9orf64   | -0.338376716 | 4.03914E-11 | 2.22147E-10 |
| SGPP1     | -0.338336105 | 4.06217E-11 | 2.23352E-10 |
| MPP5      | -0.338218444 | 4.12962E-11 | 2.26955E-10 |
| ISPD      | -0.338217824 | 4.12998E-11 | 2.26955E-10 |
| TBC1D24   | -0.338089375 | 4.20486E-11 | 2.31006E-10 |
| VPS41     | -0.338053975 | 4.22573E-11 | 2.32089E-10 |
| PHF8      | -0.338007408 | 4.25334E-11 | 2.33541E-10 |
| ABTB2     | -0.337847552 | 4.34945E-11 | 2.38752E-10 |
| LOC100126 | -0.337829379 | 4.36051E-11 | 2.39293E-10 |
| PPP1R3E   | -0.337807937 | 4.37359E-11 | 2.39945E-10 |
| SCAPER    | -0.33778677  | 4.38655E-11 | 2.4059E-10  |
| NBPF15    | -0.337784705 | 4.38781E-11 | 2.40593E-10 |

|           |              |             |             |
|-----------|--------------|-------------|-------------|
| BAT1      | 0.337725519  | 4.42424E-11 | 2.42524E-10 |
| PHACTR2   | -0.337723269 | 4.42563E-11 | 2.42533E-10 |
| SPTB      | -0.337720463 | 4.42737E-11 | 2.42561E-10 |
| FLJ11235  | -0.337703727 | 4.43773E-11 | 2.43062E-10 |
| PLEKHM1P  | -0.337692884 | 4.44446E-11 | 2.43364E-10 |
| ECM2      | -0.337674713 | 4.45575E-11 | 2.43915E-10 |
| ST6GAL2   | -0.337655779 | 4.46755E-11 | 2.44494E-10 |
| C6orf130  | 0.337647624  | 4.47264E-11 | 2.44705E-10 |
| KRCC1     | -0.337639082 | 4.47798E-11 | 2.4493E-10  |
| LARGE     | -0.337508668 | 4.56025E-11 | 2.49361E-10 |
| RNF217    | -0.337376795 | 4.64495E-11 | 2.53923E-10 |
| PPP1CC    | 0.337291577  | 4.70049E-11 | 2.56889E-10 |
| LRRC14    | 0.337233372  | 4.7388E-11  | 2.58911E-10 |
| TMEM200C  | -0.337150323 | 4.79398E-11 | 2.61855E-10 |
| KPNA3     | -0.337145223 | 4.79739E-11 | 2.61969E-10 |
| ISLR2     | -0.337055553 | 4.85772E-11 | 2.65191E-10 |
| TMEM91    | 0.337033875  | 4.87242E-11 | 2.6592E-10  |
| PCDHB12   | -0.336892727 | 4.96917E-11 | 2.71126E-10 |
| SEPSECS   | -0.336876067 | 4.98071E-11 | 2.71681E-10 |
| KCTD3     | -0.336691593 | 5.11028E-11 | 2.78672E-10 |
| ILK       | 0.336679294  | 5.11903E-11 | 2.79073E-10 |
| G6PD      | 0.336655906  | 5.13572E-11 | 2.79906E-10 |
| LOC100133 | -0.336512094 | 5.2395E-11  | 2.85484E-10 |
| AQP4      | -0.336475593 | 5.26616E-11 | 2.86859E-10 |
| FRY       | -0.336389853 | 5.32931E-11 | 2.90219E-10 |
| BMX       | -0.33637467  | 5.34057E-11 | 2.90753E-10 |
| DLST      | -0.336372127 | 5.34246E-11 | 2.90776E-10 |
| RBPJ      | 0.33633286   | 5.3717E-11  | 2.92288E-10 |
| SCN4B     | -0.336293168 | 5.40141E-11 | 2.93824E-10 |
| ABCB10    | -0.336237529 | 5.44333E-11 | 2.96024E-10 |
| ELOF1     | 0.33617829   | 5.48832E-11 | 2.98389E-10 |
| XPA       | 0.336115628  | 5.53629E-11 | 3.00915E-10 |
| AGTRAP    | 0.336091865  | 5.55459E-11 | 3.01827E-10 |
| FZD4      | -0.336088203 | 5.55742E-11 | 3.01898E-10 |
| AFAP1L2   | -0.336065934 | 5.57463E-11 | 3.02751E-10 |
| ATP5D     | 0.336055314  | 5.58285E-11 | 3.03115E-10 |
| CBLB      | -0.335969745 | 5.64957E-11 | 3.06653E-10 |
| ATAD3A    | 0.335902958  | 5.70218E-11 | 3.09425E-10 |
| ZNF706    | 0.335859995  | 5.73627E-11 | 3.1119E-10  |
| SLC2A14   | -0.335780285 | 5.80006E-11 | 3.14565E-10 |
| CRIM1     | -0.335772795 | 5.80609E-11 | 3.14806E-10 |
| ZBED1     | -0.335769059 | 5.8091E-11  | 3.14883E-10 |
| FAM110C   | -0.335653311 | 5.90309E-11 | 3.19891E-10 |
| STAM      | -0.335632873 | 5.91984E-11 | 3.20712E-10 |
| ADCY5     | -0.335622463 | 5.92839E-11 | 3.21088E-10 |
| SESN1     | -0.335575201 | 5.96736E-11 | 3.2311E-10  |



|          |              |             |             |
|----------|--------------|-------------|-------------|
| ZNF407   | -0.335567804 | 5.97348E-11 | 3.23318E-10 |
| C9orf37  | 0.335566651  | 5.97443E-11 | 3.23318E-10 |
| ZNF551   | -0.335529797 | 6.00503E-11 | 3.24885E-10 |
| CCDC85B  | 0.33548437   | 6.04295E-11 | 3.26848E-10 |
| DST      | -0.335441225 | 6.07918E-11 | 3.28718E-10 |
| RNASET2  | 0.335377496  | 6.13308E-11 | 3.31543E-10 |
| SOAT2    | 0.335315761  | 6.18575E-11 | 3.34299E-10 |
| GPR174   | -0.335250746 | 6.24168E-11 | 3.3723E-10  |
| RAB43    | -0.335238498 | 6.25227E-11 | 3.37711E-10 |
| C7orf55  | 0.335234951  | 6.25534E-11 | 3.37785E-10 |
| IGSF9B   | -0.335141755 | 6.33656E-11 | 3.42078E-10 |
| FANCI    | 0.335120283  | 6.35542E-11 | 3.43003E-10 |
| FGD5     | -0.335091634 | 6.38066E-11 | 3.44272E-10 |
| PHKA1    | -0.335018126 | 6.44588E-11 | 3.47627E-10 |
| GPATCH4  | 0.335017619  | 6.44633E-11 | 3.47627E-10 |
| GRINL1A  | -0.335010443 | 6.45273E-11 | 3.47878E-10 |
| UFM1     | -0.334973535 | 6.48576E-11 | 3.49564E-10 |
| PHACTR4  | -0.334970769 | 6.48824E-11 | 3.49603E-10 |
| BIRC2    | -0.334967559 | 6.49112E-11 | 3.49664E-10 |
| DENND5B  | -0.33493384  | 6.52146E-11 | 3.51203E-10 |
| NME1-NME | 0.334842558  | 6.60429E-11 | 3.55543E-10 |
| ADNP2    | -0.334841095 | 6.60563E-11 | 3.55543E-10 |
| RAD50    | -0.334792296 | 6.65033E-11 | 3.57853E-10 |
| TAF1D    | 0.334776281  | 6.66507E-11 | 3.58549E-10 |
| CD84     | -0.334736645 | 6.70168E-11 | 3.60421E-10 |
| CHMP4A   | 0.334716304  | 6.72054E-11 | 3.61338E-10 |
| TRO      | -0.334642195 | 6.78971E-11 | 3.64958E-10 |
| TRIM16L  | 0.334556079  | 6.87095E-11 | 3.69225E-10 |
| ENO1     | 0.334469641  | 6.95345E-11 | 3.73558E-10 |
| INE1     | -0.334458069 | 6.96456E-11 | 3.74054E-10 |
| DGAT1    | 0.334425864  | 6.99559E-11 | 3.75619E-10 |
| BID      | 0.334421044  | 7.00025E-11 | 3.75768E-10 |
| ZDHHC5   | -0.334401459 | 7.0192E-11  | 3.76684E-10 |
| KPNA2    | 0.334378686  | 7.04129E-11 | 3.77768E-10 |
| SNX22    | 0.334376483  | 7.04344E-11 | 3.77781E-10 |
| WHAMML2  | -0.334286373 | 7.13156E-11 | 3.82404E-10 |
| CASQ2    | -0.334257233 | 7.16029E-11 | 3.83842E-10 |
| GADD45A  | -0.334226103 | 7.1911E-11  | 3.8539E-10  |
| FBXW7    | -0.334202864 | 7.21419E-11 | 3.86523E-10 |
| FANCE    | 0.334176947  | 7.24002E-11 | 3.87802E-10 |
| FLOT2    | 0.334135056  | 7.28196E-11 | 3.89944E-10 |
| DOCK7    | -0.334102453 | 7.31477E-11 | 3.91596E-10 |
| ZNF680   | -0.334060282 | 7.35742E-11 | 3.93773E-10 |
| FAM120A  | -0.334013711 | 7.4048E-11  | 3.96203E-10 |
| ENTPD6   | 0.333935505  | 7.48504E-11 | 4.00388E-10 |
| ARHGEF17 | -0.333841457 | 7.58265E-11 | 4.05501E-10 |

|           |              |             |             |
|-----------|--------------|-------------|-------------|
| AHCY      | 0.333822217  | 7.60277E-11 | 4.06468E-10 |
| CHEK1     | 0.33370619   | 7.72522E-11 | 4.12903E-10 |
| NKAP      | 0.333696323  | 7.73572E-11 | 4.13283E-10 |
| UQCRC1    | 0.333695623  | 7.73647E-11 | 4.13283E-10 |
| ZSCAN16   | 0.33368918   | 7.74333E-11 | 4.13538E-10 |
| THAP9     | -0.333657245 | 7.77745E-11 | 4.15249E-10 |
| TAPT1     | -0.333619517 | 7.81794E-11 | 4.17299E-10 |
| ABCB6     | 0.333601058  | 7.83783E-11 | 4.18249E-10 |
| AKR1C1    | 0.333599022  | 7.84002E-11 | 4.18254E-10 |
| HNRNPA3P  | 0.333589557  | 7.85024E-11 | 4.18687E-10 |
| DBNL      | 0.333568917  | 7.87257E-11 | 4.19765E-10 |
| PDE12     | -0.33356145  | 7.88067E-11 | 4.20084E-10 |
| MIF       | 0.333481656  | 7.96766E-11 | 4.24608E-10 |
| FAM124B   | -0.333424125 | 8.03096E-11 | 4.27867E-10 |
| FLJ39653  | 0.333361294  | 8.10065E-11 | 4.31464E-10 |
| PIAS2     | -0.333342171 | 8.12198E-11 | 4.32407E-10 |
| CASC5     | -0.333341537 | 8.12269E-11 | 4.32407E-10 |
| ST6GALNAC | -0.333310388 | 8.15755E-11 | 4.34146E-10 |
| RNFT2     | 0.333303116  | 8.16571E-11 | 4.34464E-10 |
| GK3P      | -0.333283521 | 8.18773E-11 | 4.3552E-10  |
| GLUD2     | -0.333270717 | 8.20216E-11 | 4.36171E-10 |
| MRPS2     | 0.333234403  | 8.2432E-11  | 4.38236E-10 |
| SHPK      | -0.333228164 | 8.25027E-11 | 4.38495E-10 |
| C3orf63   | -0.333142344 | 8.34814E-11 | 4.43579E-10 |
| SMAD5     | -0.333084248 | 8.41504E-11 | 4.47014E-10 |
| AKT1      | -0.333007847 | 8.5038E-11  | 4.51609E-10 |
| MFSD1     | -0.332993862 | 8.52015E-11 | 4.52356E-10 |
| CRKL      | -0.332853468 | 8.68596E-11 | 4.61037E-10 |
| FAM198A   | -0.332734118 | 8.82939E-11 | 4.68525E-10 |
| PYCR2     | 0.33271705   | 8.85009E-11 | 4.69498E-10 |
| GLP2R     | -0.332708097 | 8.86096E-11 | 4.6995E-10  |
| PTPRC     | -0.332642226 | 8.94138E-11 | 4.74089E-10 |
| FAM98C    | 0.332607578  | 8.98397E-11 | 4.7622E-10  |
| FRS3      | 0.33258857   | 9.00742E-11 | 4.77336E-10 |
| RXRB      | 0.332574931  | 9.02428E-11 | 4.78102E-10 |
| RBBP4     | -0.332494404 | 9.12446E-11 | 4.83281E-10 |
| FAM120B   | -0.33247377  | 9.1503E-11  | 4.84521E-10 |
| MINK1     | -0.332466821 | 9.15902E-11 | 4.84853E-10 |
| THEM4     | 0.332440058  | 9.19267E-11 | 4.86506E-10 |
| RP1L1     | -0.332354124 | 9.30156E-11 | 4.92137E-10 |
| CMPK2     | -0.332267287 | 9.41286E-11 | 4.97894E-10 |
| NDUFAF4   | 0.332242807  | 9.44447E-11 | 4.99434E-10 |
| BTC       | -0.332208711 | 9.48867E-11 | 5.01638E-10 |
| CEP290    | -0.33218089  | 9.52489E-11 | 5.03419E-10 |
| ATP6V1E1  | 0.332054203  | 9.69151E-11 | 5.12089E-10 |
| FBLN5     | -0.331984118 | 9.7849E-11  | 5.16887E-10 |

|          |              |             |             |
|----------|--------------|-------------|-------------|
| FATE1    | 0.331923947  | 9.86578E-11 | 5.21021E-10 |
| MCM3     | 0.331915959  | 9.87656E-11 | 5.21452E-10 |
| RSRC2    | -0.331899478 | 9.89885E-11 | 5.2249E-10  |
| GABRR2   | -0.331890148 | 9.91149E-11 | 5.22914E-10 |
| CACNB2   | -0.331889684 | 9.91212E-11 | 5.22914E-10 |
| DUSP1    | -0.331887139 | 9.91557E-11 | 5.22957E-10 |
| ZNF417   | -0.331836898 | 9.98394E-11 | 5.26423E-10 |
| NACC2    | -0.331825713 | 9.99922E-11 | 5.27023E-10 |
| IBTK     | -0.331824707 | 1.00006E-10 | 5.27023E-10 |
| FAM195A  | 0.331670203  | 1.02141E-10 | 5.3813E-10  |
| ATG16L1  | -0.331639015 | 1.02577E-10 | 5.40285E-10 |
| TRMT2B   | -0.331632767 | 1.02665E-10 | 5.40604E-10 |
| SHANK2   | -0.331622726 | 1.02805E-10 | 5.41203E-10 |
| KLHL5    | -0.331573135 | 1.03504E-10 | 5.44738E-10 |
| GOLGA9P  | -0.331509358 | 1.0441E-10  | 5.4936E-10  |
| HIATL1   | -0.331426043 | 1.05605E-10 | 5.55499E-10 |
| TIFA     | -0.331367081 | 1.06458E-10 | 5.59841E-10 |
| PELI2    | -0.331334345 | 1.06935E-10 | 5.622E-10   |
| KIF1B    | -0.331043999 | 1.11256E-10 | 5.84762E-10 |
| PYGO2    | 0.331035199  | 1.1139E-10  | 5.85309E-10 |
| ACE      | -0.330996754 | 1.11975E-10 | 5.88099E-10 |
| FOSL2    | -0.330996459 | 1.11979E-10 | 5.88099E-10 |
| C17orf85 | -0.330961294 | 1.12518E-10 | 5.90769E-10 |
| COL14A1  | -0.330957353 | 1.12578E-10 | 5.90931E-10 |
| TGFBR1   | -0.330906973 | 1.13354E-10 | 5.94846E-10 |
| KIAA0284 | -0.330899977 | 1.13462E-10 | 5.95256E-10 |
| ZNHIT2   | 0.33079984   | 1.15021E-10 | 6.03275E-10 |
| C17orf59 | 0.330779688  | 1.15337E-10 | 6.04774E-10 |
| FANCG    | 0.330675228  | 1.16989E-10 | 6.13278E-10 |
| WFDC3    | 0.33064669   | 1.17445E-10 | 6.15504E-10 |
| C1QTNF7  | -0.330569438 | 1.18687E-10 | 6.21848E-10 |
| C6orf150 | -0.330495778 | 1.19882E-10 | 6.27948E-10 |
| SMURF2   | -0.330491051 | 1.1996E-10  | 6.28187E-10 |
| ASF1B    | 0.33037551   | 1.2186E-10  | 6.37972E-10 |
| CXXC1    | 0.330262981  | 1.23739E-10 | 6.4764E-10  |
| PITPNA   | -0.33013512  | 1.25909E-10 | 6.58822E-10 |
| NEO1     | -0.33009066  | 1.26672E-10 | 6.62641E-10 |
| SP1      | -0.330084715 | 1.26774E-10 | 6.63002E-10 |
| LY6G5C   | 0.330023319  | 1.27836E-10 | 6.6838E-10  |
| ZBTB20   | -0.329886679 | 1.30231E-10 | 6.80721E-10 |
| DHX29    | -0.329868583 | 1.30551E-10 | 6.82217E-10 |
| ZNF397OS | -0.329783936 | 1.3206E-10  | 6.89921E-10 |
| TRAPPC6B | -0.329742108 | 1.32812E-10 | 6.93666E-10 |
| PDGFRB   | -0.329731661 | 1.33E-10    | 6.94468E-10 |
| PFKFB3   | -0.329725198 | 1.33117E-10 | 6.94896E-10 |
| SPDYE3   | -0.329647746 | 1.34523E-10 | 7.02053E-10 |

|           |              |             |             |
|-----------|--------------|-------------|-------------|
| MGA       | -0.329588474 | 1.35609E-10 | 7.07535E-10 |
| FLNA      | -0.329582354 | 1.35722E-10 | 7.07937E-10 |
| NCKAP5    | -0.329574233 | 1.35872E-10 | 7.08531E-10 |
| EGR2      | -0.329554316 | 1.36239E-10 | 7.10262E-10 |
| PCDHGB4   | -0.329490341 | 1.37426E-10 | 7.16263E-10 |
| CHKA      | 0.329316628  | 1.407E-10   | 7.33136E-10 |
| WDR20     | -0.329237907 | 1.42209E-10 | 7.40803E-10 |
| SEC11C    | 0.329052751  | 1.4582E-10  | 7.59414E-10 |
| ATP2B4    | -0.329009274 | 1.4668E-10  | 7.63697E-10 |
| IQGAP2    | -0.328982089 | 1.47221E-10 | 7.66312E-10 |
| C14orf80  | 0.32895946   | 1.47673E-10 | 7.68461E-10 |
| SRCAP     | -0.32889053  | 1.49056E-10 | 7.75459E-10 |
| ZBTB6     | -0.328886693 | 1.49134E-10 | 7.75659E-10 |
| NBLA00301 | -0.328863942 | 1.49594E-10 | 7.77847E-10 |
| WNT9B     | -0.328859115 | 1.49691E-10 | 7.78152E-10 |
| SLC46A3   | -0.32859095  | 1.55218E-10 | 8.06674E-10 |
| ZBTB10    | -0.328580915 | 1.55429E-10 | 8.07558E-10 |
| TMTC3     | -0.328571216 | 1.55633E-10 | 8.08406E-10 |
| ECSIT     | 0.328538733  | 1.56318E-10 | 8.11751E-10 |
| EGR3      | -0.328501064 | 1.57115E-10 | 8.1568E-10  |
| NAPRT1    | 0.328492307  | 1.57301E-10 | 8.16433E-10 |
| NDUFV3    | 0.328484684  | 1.57463E-10 | 8.17061E-10 |
| TJAP1     | 0.328368744  | 1.59948E-10 | 8.2974E-10  |
| DCTN2     | 0.328361734  | 1.601E-10   | 8.3031E-10  |
| PDZD11    | 0.328273762  | 1.62013E-10 | 8.40012E-10 |
| DCK       | -0.328269796 | 1.621E-10   | 8.40243E-10 |
| ISCA2     | 0.328212616  | 1.63355E-10 | 8.46532E-10 |
| AP4M1     | 0.328188364  | 1.63891E-10 | 8.48937E-10 |
| MCM5      | 0.328187744  | 1.63905E-10 | 8.48937E-10 |
| APLP2     | -0.328156436 | 1.64599E-10 | 8.52309E-10 |
| UTP11L    | 0.32811608   | 1.65497E-10 | 8.5674E-10  |
| SCN11A    | -0.328040925 | 1.67184E-10 | 8.65217E-10 |
| PTER      | -0.328039236 | 1.67222E-10 | 8.65217E-10 |
| PDE8B     | -0.328005923 | 1.67975E-10 | 8.68887E-10 |
| OMD       | -0.328003174 | 1.68037E-10 | 8.68983E-10 |
| PHOSPHO1  | -0.327997685 | 1.68161E-10 | 8.69401E-10 |
| HIST1H1C  | 0.327995567  | 1.68209E-10 | 8.69424E-10 |
| NEURL2    | 0.327990881  | 1.68316E-10 | 8.69748E-10 |
| KHDRBS1   | 0.327974055  | 1.68698E-10 | 8.71497E-10 |
| C20orf94  | -0.327968686 | 1.6882E-10  | 8.71902E-10 |
| CYP2W1    | 0.327890407  | 1.70611E-10 | 8.80626E-10 |
| STAT3     | -0.327890207 | 1.70616E-10 | 8.80626E-10 |
| ITGB1BP1  | 0.327889069  | 1.70642E-10 | 8.80626E-10 |
| TRIM33    | -0.32785108  | 1.71518E-10 | 8.84918E-10 |
| CDC73     | -0.327817802 | 1.72289E-10 | 8.88665E-10 |
| FLRT2     | -0.327781466 | 1.73135E-10 | 8.92796E-10 |

|          |              |             |             |
|----------|--------------|-------------|-------------|
| NT5DC1   | -0.327701737 | 1.75005E-10 | 9.02204E-10 |
| CHSY3    | -0.327685486 | 1.75388E-10 | 9.03948E-10 |
| ZFYVE19  | 0.327655453  | 1.76099E-10 | 9.07377E-10 |
| TWF2     | 0.327652772  | 1.76163E-10 | 9.0747E-10  |
| C7       | -0.327596474 | 1.77503E-10 | 9.1414E-10  |
| MRPL37   | 0.327487454  | 1.80128E-10 | 9.27416E-10 |
| RUFY2    | -0.327480815 | 1.80289E-10 | 9.28005E-10 |
| C16orf75 | 0.327374148  | 1.82895E-10 | 9.41179E-10 |
| DOCK6    | -0.327306119 | 1.84577E-10 | 9.49587E-10 |
| PANK2    | 0.327251978  | 1.85926E-10 | 9.5628E-10  |
| VPS39    | -0.32716061  | 1.88224E-10 | 9.67851E-10 |
| PHF3     | -0.327151146 | 1.88464E-10 | 9.68833E-10 |
| ZNF232   | 0.327123972  | 1.89154E-10 | 9.72128E-10 |
| RNF180   | -0.327103484 | 1.89675E-10 | 9.74557E-10 |
| RIOK1    | 0.327063648  | 1.90694E-10 | 9.79536E-10 |
| CLN8     | -0.327004156 | 1.92224E-10 | 9.87144E-10 |
| COL3A1   | -0.32693489  | 1.94021E-10 | 9.96116E-10 |
| C15orf52 | -0.326804406 | 1.97451E-10 | 1.01347E-09 |
| PHF12    | -0.326790202 | 1.97828E-10 | 1.01514E-09 |
| KCTD2    | 0.326702455  | 2.00172E-10 | 1.0269E-09  |
| PSMG2    | 0.326698404  | 2.00281E-10 | 1.0272E-09  |
| KIAA1530 | -0.326648106 | 2.01638E-10 | 1.03389E-09 |
| KIF3A    | -0.326638442 | 2.01899E-10 | 1.03496E-09 |
| NDUFC1   | 0.326622883  | 2.02321E-10 | 1.03686E-09 |
| RASGRP3  | -0.326576824 | 2.03575E-10 | 1.04302E-09 |
| MAP3K7   | -0.326551308 | 2.04273E-10 | 1.04632E-09 |
| HMGNI    | 0.326424314  | 2.07782E-10 | 1.06402E-09 |
| TMEM9    | 0.326421947  | 2.07848E-10 | 1.06409E-09 |
| MRPS30   | 0.326380327  | 2.09011E-10 | 1.06977E-09 |
| ADRA1B   | -0.326377919 | 2.09079E-10 | 1.06984E-09 |
| C9orf80  | -0.326343753 | 2.10039E-10 | 1.07447E-09 |
| ABAT     | -0.32632784  | 2.10487E-10 | 1.07649E-09 |
| LARP4    | -0.32632461  | 2.10578E-10 | 1.07668E-09 |
| TUFM     | 0.32631228   | 2.10927E-10 | 1.07818E-09 |
| MGMT     | 0.326270689  | 2.12105E-10 | 1.08393E-09 |
| DNAJC16  | -0.326258222 | 2.1246E-10  | 1.08547E-09 |
| PRDM10   | -0.326251517 | 2.12651E-10 | 1.08616E-09 |
| CLDND1   | -0.326204573 | 2.13993E-10 | 1.09274E-09 |
| ZNF721   | -0.326047128 | 2.18553E-10 | 1.11574E-09 |
| JOSD2    | 0.325999382  | 2.19955E-10 | 1.1226E-09  |
| CRHBP    | -0.325982025 | 2.20467E-10 | 1.12493E-09 |
| CAPN7    | -0.325980028 | 2.20526E-10 | 1.12494E-09 |
| TMEM38A  | -0.325947341 | 2.21493E-10 | 1.12958E-09 |
| ZNF446   | 0.325914951  | 2.22455E-10 | 1.1342E-09  |
| YME1L1   | -0.325910706 | 2.22581E-10 | 1.13455E-09 |
| PHF5A    | 0.325880236  | 2.23491E-10 | 1.1389E-09  |

|          |              |             |             |
|----------|--------------|-------------|-------------|
| EIF4E3   | -0.325853485 | 2.24292E-10 | 1.14269E-09 |
| CCT2     | 0.325830884  | 2.24971E-10 | 1.14586E-09 |
| CD164    | -0.325787598 | 2.26278E-10 | 1.15222E-09 |
| ERO1L    | -0.325775477 | 2.26645E-10 | 1.15379E-09 |
| NEK4     | -0.325772854 | 2.26725E-10 | 1.1539E-09  |
| DALRD3   | 0.32574401   | 2.27601E-10 | 1.15807E-09 |
| HSD17B1  | 0.325728637  | 2.2807E-10  | 1.16003E-09 |
| LRRK1    | -0.325727538 | 2.28103E-10 | 1.16003E-09 |
| STAT5B   | -0.325675838 | 2.29686E-10 | 1.16778E-09 |
| RLIM     | -0.325647544 | 2.30556E-10 | 1.17187E-09 |
| MYO5A    | -0.325645888 | 2.30607E-10 | 1.17187E-09 |
| GREB1L   | -0.325643268 | 2.30688E-10 | 1.17198E-09 |
| LPIN2    | -0.325637841 | 2.30855E-10 | 1.17253E-09 |
| UBE2V2   | 0.325556895  | 2.33367E-10 | 1.18498E-09 |
| BACH2    | -0.325541827 | 2.33837E-10 | 1.18707E-09 |
| FRMD4A   | -0.325489533 | 2.35477E-10 | 1.19509E-09 |
| TPI1P2   | -0.325469017 | 2.36124E-10 | 1.19807E-09 |
| ENDOG    | 0.325391317  | 2.38588E-10 | 1.21026E-09 |
| CAST     | -0.325344785 | 2.40075E-10 | 1.21749E-09 |
| MBOAT7   | 0.325328058  | 2.40612E-10 | 1.21991E-09 |
| TRIM5    | -0.325307284 | 2.4128E-10  | 1.22298E-09 |
| PEX6     | 0.32526316   | 2.42706E-10 | 1.2299E-09  |
| NAP1L1   | 0.325255195  | 2.42964E-10 | 1.23089E-09 |
| CPOX     | -0.325214578 | 2.44285E-10 | 1.23727E-09 |
| FAM89B   | 0.325200821  | 2.44734E-10 | 1.23923E-09 |
| RNF144B  | -0.325185893 | 2.45223E-10 | 1.24138E-09 |
| RNPC3    | -0.325166706 | 2.45851E-10 | 1.24425E-09 |
| OLA1     | 0.325100359  | 2.48038E-10 | 1.255E-09   |
| RABAC1   | 0.325057315  | 2.49466E-10 | 1.26191E-09 |
| NAP1L5   | -0.325000944 | 2.51349E-10 | 1.27111E-09 |
| SLC2A4RG | 0.324889329  | 2.55119E-10 | 1.28962E-09 |
| XRN2     | -0.324888119 | 2.5516E-10  | 1.28962E-09 |
| DNPEP    | 0.324886789  | 2.55205E-10 | 1.28962E-09 |
| WASF3    | -0.324866138 | 2.55909E-10 | 1.29285E-09 |
| RNF146   | -0.324773691 | 2.59082E-10 | 1.30855E-09 |
| FOXF1    | -0.324723227 | 2.6083E-10  | 1.31705E-09 |
| ANKRA2   | -0.324709928 | 2.61293E-10 | 1.31905E-09 |
| FLG      | -0.324625834 | 2.64236E-10 | 1.33347E-09 |
| ZNF449   | -0.324624501 | 2.64283E-10 | 1.33347E-09 |
| C17orf62 | 0.324583438  | 2.65733E-10 | 1.34044E-09 |
| MCFD2    | -0.324579842 | 2.6586E-10  | 1.34075E-09 |
| YPEL2    | -0.324511567 | 2.68288E-10 | 1.35265E-09 |
| HNRNPH2  | -0.324451936 | 2.70427E-10 | 1.36308E-09 |
| ANKRD13C | -0.324423029 | 2.71469E-10 | 1.36799E-09 |
| RFWD2    | 0.324365519  | 2.73555E-10 | 1.37816E-09 |
| PRKD3    | -0.32435446  | 2.73958E-10 | 1.37984E-09 |

|           |              |             |             |
|-----------|--------------|-------------|-------------|
| C6orf211  | -0.324338354 | 2.74546E-10 | 1.38245E-09 |
| DTX2      | 0.324266829  | 2.77171E-10 | 1.39531E-09 |
| ELMO2     | -0.32424076  | 2.78134E-10 | 1.39981E-09 |
| TET3      | -0.324213975 | 2.79126E-10 | 1.40445E-09 |
| NBPF3     | -0.324173925 | 2.80617E-10 | 1.41159E-09 |
| HRH2      | -0.324156713 | 2.8126E-10  | 1.41447E-09 |
| HYI       | 0.324152941  | 2.81401E-10 | 1.41482E-09 |
| S100A10   | 0.324132845  | 2.82154E-10 | 1.41825E-09 |
| DNAL1     | -0.324129859 | 2.82266E-10 | 1.41845E-09 |
| PAFAH2    | -0.324094926 | 2.8358E-10  | 1.4247E-09  |
| ZNF668    | 0.32408901   | 2.83803E-10 | 1.42546E-09 |
| TMEM30B   | -0.324060028 | 2.84899E-10 | 1.4306E-09  |
| GNB1L     | 0.324054799  | 2.85097E-10 | 1.43123E-09 |
| FRMPD1    | -0.323995488 | 2.87353E-10 | 1.4422E-09  |
| MAGI3     | -0.323984286 | 2.87781E-10 | 1.44398E-09 |
| N4BP2L1   | -0.323962631 | 2.88611E-10 | 1.44778E-09 |
| CLNS1A    | 0.323941553  | 2.8942E-10  | 1.45147E-09 |
| ARSJ      | -0.323937829 | 2.89563E-10 | 1.45183E-09 |
| SARS2     | 0.323930441  | 2.89848E-10 | 1.45289E-09 |
| VPS29     | 0.323921359  | 2.90198E-10 | 1.45427E-09 |
| PLEKHG5   | -0.323909245 | 2.90665E-10 | 1.45625E-09 |
| C14orf106 | -0.323883018 | 2.91679E-10 | 1.46094E-09 |
| MYL12B    | 0.323881255  | 2.91748E-10 | 1.46094E-09 |
| WDR62     | 0.323794664  | 2.95123E-10 | 1.47747E-09 |
| BMPER     | -0.323779853 | 2.95704E-10 | 1.48E-09    |
| ZNF628    | 0.323773568  | 2.95951E-10 | 1.48087E-09 |
| C9orf72   | -0.323737043 | 2.97389E-10 | 1.48769E-09 |
| FOXN3     | -0.323721288 | 2.98012E-10 | 1.49043E-09 |
| DUSP12    | 0.32367048   | 3.00029E-10 | 1.50014E-09 |
| TUBGCP2   | 0.323615243  | 3.02237E-10 | 1.5108E-09  |
| TBC1D13   | 0.3236065    | 3.02587E-10 | 1.51218E-09 |
| GCAT      | 0.323421609  | 3.10101E-10 | 1.54934E-09 |
| MESP2     | 0.323388921  | 3.11448E-10 | 1.55568E-09 |
| THADA     | 0.32337022   | 3.12221E-10 | 1.55915E-09 |
| FAM54A    | 0.323343716  | 3.1332E-10  | 1.56425E-09 |
| C12orf52  | 0.323331156  | 3.13843E-10 | 1.56646E-09 |
| GAS6      | -0.323320632 | 3.14281E-10 | 1.56825E-09 |
| HRNR      | -0.323263052 | 3.16689E-10 | 1.57987E-09 |
| SRPR      | -0.323219653 | 3.18515E-10 | 1.58852E-09 |
| MED10     | 0.3232163    | 3.18657E-10 | 1.58852E-09 |
| ACTR5     | 0.323216186  | 3.18662E-10 | 1.58852E-09 |
| SNRNP70   | 0.323211815  | 3.18846E-10 | 1.58905E-09 |
| NARFL     | 0.323208426  | 3.1899E-10  | 1.58936E-09 |
| MEX3B     | -0.323125535 | 3.22512E-10 | 1.60651E-09 |
| DOPEY2    | -0.323056153 | 3.2549E-10  | 1.62094E-09 |
| RXFP1     | -0.323039574 | 3.26205E-10 | 1.62409E-09 |

|           |              |             |             |
|-----------|--------------|-------------|-------------|
| E2F1      | 0.323002706  | 3.27802E-10 | 1.63164E-09 |
| SLC22A8   | 0.322893715  | 3.32566E-10 | 1.65494E-09 |
| NHEDC2    | -0.322795386 | 3.36922E-10 | 1.67619E-09 |
| GAPVD1    | -0.322705793 | 3.40939E-10 | 1.69575E-09 |
| SSBP4     | 0.322650656  | 3.43434E-10 | 1.70774E-09 |
| EXPH5     | -0.322626605 | 3.44528E-10 | 1.71275E-09 |
| CPSF3L    | 0.32261203   | 3.45193E-10 | 1.71563E-09 |
| TNFRSF4   | 0.322486703  | 3.50959E-10 | 1.74385E-09 |
| RSPH3     | -0.322409934 | 3.54538E-10 | 1.76119E-09 |
| PTPRK     | -0.322367037 | 3.56553E-10 | 1.77076E-09 |
| NSDHL     | 0.322351579  | 3.57281E-10 | 1.77394E-09 |
| AHDC1     | -0.322307423 | 3.59371E-10 | 1.78387E-09 |
| TTC21B    | -0.322203736 | 3.64326E-10 | 1.80801E-09 |
| PRKRIP1   | 0.322178299  | 3.65551E-10 | 1.81364E-09 |
| DYNC2H1   | -0.322083404 | 3.70159E-10 | 1.83587E-09 |
| PURA      | -0.322082233 | 3.70216E-10 | 1.83587E-09 |
| C12orf72  | -0.322040575 | 3.72257E-10 | 1.84553E-09 |
| CLIC5     | -0.321945188 | 3.76971E-10 | 1.86843E-09 |
| PRR7      | 0.321938751  | 3.77291E-10 | 1.86956E-09 |
| LUZP6     | -0.321885038 | 3.79973E-10 | 1.88238E-09 |
| GIT2      | -0.321833847 | 3.82546E-10 | 1.89466E-09 |
| SMYD4     | -0.321819645 | 3.83263E-10 | 1.89774E-09 |
| PFDN1     | 0.321814684  | 3.83514E-10 | 1.8985E-09  |
| MAN2A2    | -0.321754368 | 3.86576E-10 | 1.91318E-09 |
| DUSP19    | -0.321739281 | 3.87345E-10 | 1.91652E-09 |
| FAM32A    | 0.321690308  | 3.89853E-10 | 1.92845E-09 |
| TBRG1     | -0.321687279 | 3.90009E-10 | 1.92874E-09 |
| CAT       | -0.321603236 | 3.94351E-10 | 1.94973E-09 |
| GFPT1     | -0.321493534 | 4.00091E-10 | 1.97761E-09 |
| C20orf111 | 0.32148985   | 4.00285E-10 | 1.97808E-09 |
| PPP2CB    | -0.321486406 | 4.00466E-10 | 1.97849E-09 |
| ZFP3      | -0.321467061 | 4.01488E-10 | 1.98304E-09 |
| CA2       | -0.321358807 | 4.0725E-10  | 2.01101E-09 |
| TTPAL     | -0.321350338 | 4.07704E-10 | 2.01275E-09 |
| BCL9L     | -0.321338325 | 4.08349E-10 | 2.01543E-09 |
| ALKBH6    | 0.32129041   | 4.10932E-10 | 2.02768E-09 |
| BRP44     | 0.321240318  | 4.1365E-10  | 2.04058E-09 |
| C20orf43  | 0.321229173  | 4.14257E-10 | 2.04307E-09 |
| SRFBP1    | -0.321209673 | 4.15321E-10 | 2.04781E-09 |
| DEDD2     | 0.321206793  | 4.15478E-10 | 2.04808E-09 |
| NPIPL3    | 0.321141372  | 4.19068E-10 | 2.06527E-09 |
| IQSEC3    | -0.321071477 | 4.22938E-10 | 2.08382E-09 |
| PIP4K2C   | -0.321023875 | 4.25593E-10 | 2.09638E-09 |
| MDFIC     | -0.321007191 | 4.26527E-10 | 2.10047E-09 |
| FAM103A1  | 0.320868085  | 4.34396E-10 | 2.13869E-09 |
| MRPS28    | 0.320864699  | 4.34589E-10 | 2.13911E-09 |



|          |              |             |             |
|----------|--------------|-------------|-------------|
| AAMP     | 0.32082409   | 4.36914E-10 | 2.15002E-09 |
| ABHD15   | -0.320704921 | 4.43805E-10 | 2.18339E-09 |
| HJURP    | 0.320676943  | 4.45439E-10 | 2.19089E-09 |
| ACACB    | -0.320626293 | 4.4841E-10  | 2.20496E-09 |
| TARDBP   | 0.320609488  | 4.494E-10   | 2.20928E-09 |
| SAE1     | 0.320560305  | 4.52311E-10 | 2.22304E-09 |
| PRPF38B  | -0.320460779 | 4.58256E-10 | 2.25171E-09 |
| QTRTD1   | -0.320391784 | 4.62422E-10 | 2.27161E-09 |
| DCN      | -0.320361846 | 4.64241E-10 | 2.27999E-09 |
| MPI      | 0.320337835  | 4.65705E-10 | 2.28661E-09 |
| STXBP1   | -0.320279762 | 4.69264E-10 | 2.30352E-09 |
| CIB3     | 0.320179876  | 4.75448E-10 | 2.3333E-09  |
| GLS      | -0.320145702 | 4.77582E-10 | 2.3432E-09  |
| DCAF12   | -0.320107406 | 4.79984E-10 | 2.35441E-09 |
| TRPC4    | -0.320066664 | 4.82553E-10 | 2.36642E-09 |
| PPL      | -0.319980524 | 4.88028E-10 | 2.39268E-09 |
| CBX8     | 0.319765457  | 5.01962E-10 | 2.46039E-09 |
| EDA2R    | -0.319745733 | 5.03259E-10 | 2.46614E-09 |
| SMC6     | -0.319651434 | 5.09505E-10 | 2.49614E-09 |
| MED1     | -0.319604846 | 5.12619E-10 | 2.51077E-09 |
| DHPS     | 0.319598549  | 5.13041E-10 | 2.51222E-09 |
| CDC40    | -0.319568831 | 5.15039E-10 | 2.52139E-09 |
| HOXB3    | -0.319494497 | 5.20068E-10 | 2.54538E-09 |
| KTI12    | 0.319439201  | 5.23841E-10 | 2.56322E-09 |
| SYPL1    | -0.319437091 | 5.23985E-10 | 2.56329E-09 |
| ARFGAP3  | -0.319417631 | 5.25319E-10 | 2.56919E-09 |
| PMM1     | 0.319410556  | 5.25805E-10 | 2.57093E-09 |
| MMAA     | -0.319384017 | 5.27632E-10 | 2.57923E-09 |
| CEP135   | -0.319346437 | 5.30229E-10 | 2.59129E-09 |
| WBP1     | 0.319291095  | 5.34076E-10 | 2.60945E-09 |
| TRIP13   | 0.319249711  | 5.36971E-10 | 2.62295E-09 |
| EXOC8    | -0.319231038 | 5.38281E-10 | 2.62871E-09 |
| ACOT13   | 0.319190834  | 5.41115E-10 | 2.6419E-09  |
| MPG      | 0.319140717  | 5.44667E-10 | 2.65859E-09 |
| GNL3L    | -0.31910109  | 5.47492E-10 | 2.67172E-09 |
| ZNF154   | -0.319085253 | 5.48625E-10 | 2.67659E-09 |
| APOLD1   | -0.319081722 | 5.48877E-10 | 2.67717E-09 |
| C17orf81 | 0.319063794  | 5.50163E-10 | 2.68279E-09 |
| POLR3K   | 0.319038492  | 5.51983E-10 | 2.691E-09   |
| KIAA1147 | -0.319035173 | 5.52222E-10 | 2.69151E-09 |
| ZHX3     | -0.318969435 | 5.56979E-10 | 2.71403E-09 |
| HIST1H1A | 0.318942877  | 5.58912E-10 | 2.72278E-09 |
| ASAH2B   | -0.318933345 | 5.59607E-10 | 2.7255E-09  |
| COL6A6   | -0.318839787 | 5.66478E-10 | 2.75829E-09 |
| LTBP2    | -0.318779658 | 5.70936E-10 | 2.77932E-09 |
| ASAP2    | -0.318771351 | 5.71555E-10 | 2.78165E-09 |

|           |              |             |             |
|-----------|--------------|-------------|-------------|
| ARPC1A    | 0.318691248  | 5.77554E-10 | 2.81016E-09 |
| ABI1      | -0.318636127 | 5.81717E-10 | 2.82973E-09 |
| PSMA1     | 0.318625586  | 5.82517E-10 | 2.83292E-09 |
| SLC7A2    | -0.318607872 | 5.83863E-10 | 2.83878E-09 |
| PRRC1     | -0.31851943  | 5.90629E-10 | 2.87097E-09 |
| MPRIIP    | -0.318479752 | 5.93689E-10 | 2.88514E-09 |
| ARNTL     | -0.318434505 | 5.97197E-10 | 2.90148E-09 |
| FMNL3     | -0.31837302  | 6.01996E-10 | 2.92409E-09 |
| ASAH1     | -0.318368056 | 6.02385E-10 | 2.92526E-09 |
| C1orf156  | 0.318336278  | 6.04882E-10 | 2.93667E-09 |
| FEN1      | 0.318323499  | 6.05889E-10 | 2.94084E-09 |
| OGG1      | 0.318273847  | 6.09817E-10 | 2.95919E-09 |
| DEPDC5    | -0.318254399 | 6.11362E-10 | 2.96596E-09 |
| H2AFB1    | 0.318218633  | 6.14214E-10 | 2.97907E-09 |
| STX11     | -0.318215509 | 6.14463E-10 | 2.97956E-09 |
| LOC375190 | 0.318194564  | 6.1614E-10  | 2.98696E-09 |
| RALGDS    | -0.31818426  | 6.16966E-10 | 2.99024E-09 |
| EIF2C3    | -0.31803551  | 6.29018E-10 | 3.0479E-09  |
| BAD       | 0.318018989  | 6.3037E-10  | 3.05371E-09 |
| SLIT3     | -0.318010363 | 6.31077E-10 | 3.0564E-09  |
| SNAPIN    | 0.317944244  | 6.36525E-10 | 3.08203E-09 |
| LRRC57    | -0.317940081 | 6.36869E-10 | 3.08295E-09 |
| TCEANC    | -0.317835112 | 6.45615E-10 | 3.12453E-09 |
| HDDC2     | 0.317831921  | 6.45883E-10 | 3.12506E-09 |
| SEMA3G    | -0.317718384 | 6.55479E-10 | 3.17072E-09 |
| TRIM54    | 0.317698071  | 6.5721E-10  | 3.17832E-09 |
| GOLPH3    | -0.317689958 | 6.57903E-10 | 3.1809E-09  |
| LRRC8C    | -0.317615586 | 6.64286E-10 | 3.21098E-09 |
| MCTP1     | -0.317479845 | 6.76092E-10 | 3.26726E-09 |
| RAB14     | -0.317462563 | 6.77609E-10 | 3.2738E-09  |
| LOC145820 | -0.317416874 | 6.81637E-10 | 3.29246E-09 |
| WASL      | -0.317373174 | 6.85512E-10 | 3.31037E-09 |
| ANKRD5    | -0.317369125 | 6.85872E-10 | 3.31131E-09 |
| MAFB      | -0.31734284  | 6.88214E-10 | 3.32181E-09 |
| NUF2      | 0.317302424  | 6.9183E-10  | 3.33845E-09 |
| PCDHB14   | -0.31730043  | 6.92009E-10 | 3.33851E-09 |
| CCBE1     | -0.31729606  | 6.92401E-10 | 3.33959E-09 |
| STIM2     | -0.317281344 | 6.93724E-10 | 3.34516E-09 |
| AKAP12    | -0.317268014 | 6.94924E-10 | 3.35013E-09 |
| PRDX6     | 0.317244081  | 6.97083E-10 | 3.35973E-09 |
| HNRNPL    | 0.317194537  | 7.01574E-10 | 3.38056E-09 |
| MTR       | -0.317107085 | 7.0957E-10  | 3.41826E-09 |
| EFNA2     | -0.31710002  | 7.1022E-10  | 3.42056E-09 |
| COPB1     | -0.317073234 | 7.12689E-10 | 3.43162E-09 |
| FBXO36    | -0.3169571   | 7.2349E-10  | 3.48279E-09 |
| NCLN      | 0.316952385  | 7.23932E-10 | 3.48408E-09 |

|           |              |             |             |
|-----------|--------------|-------------|-------------|
| ERMAP     | -0.316863376 | 7.32323E-10 | 3.52361E-09 |
| CRK       | -0.316819591 | 7.36485E-10 | 3.54278E-09 |
| FAM162A   | 0.316774248  | 7.4082E-10  | 3.56277E-09 |
| URB1      | -0.316769393 | 7.41285E-10 | 3.56415E-09 |
| MCCD1     | 0.316610606  | 7.5667E-10  | 3.63724E-09 |
| ZNF443    | -0.316594501 | 7.58248E-10 | 3.64394E-09 |
| EMD       | 0.316567646  | 7.60886E-10 | 3.65574E-09 |
| TCF21     | -0.316558721 | 7.61764E-10 | 3.65908E-09 |
| CSTB      | 0.316542634  | 7.6335E-10  | 3.66581E-09 |
| PTGFR     | -0.316530876 | 7.64512E-10 | 3.6705E-09  |
| GCHFR     | 0.316481618  | 7.69396E-10 | 3.69306E-09 |
| MAPKBP1   | -0.316471088 | 7.70444E-10 | 3.6972E-09  |
| CPT1A     | -0.316457364 | 7.71811E-10 | 3.70243E-09 |
| RAD54L    | 0.316456428  | 7.71905E-10 | 3.70243E-09 |
| RHOC      | 0.316428267  | 7.7472E-10  | 3.71503E-09 |
| SIRT3     | 0.316399237  | 7.77631E-10 | 3.7281E-09  |
| ATG4C     | -0.316363905 | 7.8119E-10  | 3.74426E-09 |
| PRIM2     | 0.316355966  | 7.81992E-10 | 3.7472E-09  |
| BDKRB2    | -0.316342639 | 7.83339E-10 | 3.75276E-09 |
| NR4A2     | -0.316265645 | 7.9117E-10  | 3.78936E-09 |
| HIST1H2AM | 0.31624423   | 7.93361E-10 | 3.79894E-09 |
| PAK1IP1   | 0.316216444  | 7.96213E-10 | 3.81168E-09 |
| FOS       | -0.316151057 | 8.02964E-10 | 3.84307E-09 |
| PLXDC2    | -0.316033278 | 8.15265E-10 | 3.90101E-09 |
| CTR9      | -0.316029018 | 8.15713E-10 | 3.90222E-09 |
| PBRM1     | -0.316011832 | 8.17524E-10 | 3.90994E-09 |
| C12orf27  | 0.315992335  | 8.19583E-10 | 3.91885E-09 |
| PLSCR1    | -0.315943315 | 8.24783E-10 | 3.94276E-09 |
| LOC100128 | 0.315941283  | 8.25E-10    | 3.94285E-09 |
| DCLRE1A   | -0.315935061 | 8.25662E-10 | 3.94507E-09 |
| SGCD      | -0.315930043 | 8.26197E-10 | 3.94668E-09 |
| ZNF775    | 0.315900082  | 8.29396E-10 | 3.96101E-09 |
| SYDE2     | -0.315873762 | 8.32216E-10 | 3.97353E-09 |
| HMG20A    | -0.315857362 | 8.33978E-10 | 3.98099E-09 |
| DDX60L    | -0.315783248 | 8.41987E-10 | 4.01825E-09 |
| COX4I2    | 0.315763598  | 8.44123E-10 | 4.02748E-09 |
| TUBGCP3   | -0.315679403 | 8.53334E-10 | 4.07045E-09 |
| PDZRN4    | -0.315674179 | 8.53909E-10 | 4.07222E-09 |
| C6orf64   | 0.315617199  | 8.60202E-10 | 4.10125E-09 |
| PTCH2     | -0.315569498 | 8.65505E-10 | 4.12555E-09 |
| MYL5      | 0.315557788  | 8.66812E-10 | 4.13079E-09 |
| ZMYM5     | -0.315554627 | 8.67165E-10 | 4.13148E-09 |
| BANF2     | 0.315498753  | 8.73428E-10 | 4.16033E-09 |
| EP400     | -0.315472025 | 8.7644E-10  | 4.17367E-09 |
| IQCD      | 0.31546131   | 8.7765E-10  | 4.17844E-09 |
| MTCP1     | -0.315455375 | 8.78321E-10 | 4.18063E-09 |

|           |              |             |             |
|-----------|--------------|-------------|-------------|
| DNTTIP2   | 0.315440294  | 8.80029E-10 | 4.18776E-09 |
| C6orf52   | 0.315430536  | 8.81135E-10 | 4.19202E-09 |
| RPL23AP82 | 0.315400489  | 8.8455E-10  | 4.20727E-09 |
| LOC647979 | -0.315388374 | 8.85931E-10 | 4.21283E-09 |
| GOLGA6B   | -0.31534422  | 8.90981E-10 | 4.23583E-09 |
| PRUNE2    | -0.315300419 | 8.96019E-10 | 4.25876E-09 |
| TSSK4     | -0.315249656 | 9.01891E-10 | 4.28565E-09 |
| GSK3B     | -0.315242272 | 9.02749E-10 | 4.2887E-09  |
| LARS2     | -0.315192427 | 9.08557E-10 | 4.31526E-09 |
| MAMLD1    | -0.315165697 | 9.11686E-10 | 4.3291E-09  |
| PKP2      | -0.31511683  | 9.17435E-10 | 4.35535E-09 |
| CCT6A     | 0.315064412  | 9.2364E-10  | 4.38377E-09 |
| LTA4H     | 0.315058228  | 9.24375E-10 | 4.38621E-09 |
| MBD3      | 0.31502317   | 9.28551E-10 | 4.40498E-09 |
| SSPN      | -0.314845186 | 9.50037E-10 | 4.50583E-09 |
| C20orf7   | 0.314823304  | 9.52712E-10 | 4.51744E-09 |
| FAM82A1   | -0.314752213 | 9.61452E-10 | 4.5578E-09  |
| GALK1     | 0.314633653  | 9.76201E-10 | 4.62662E-09 |
| SLC35E1   | -0.314603967 | 9.79929E-10 | 4.64318E-09 |
| RASSF5    | -0.314519807 | 9.90571E-10 | 4.69249E-09 |
| SLFN11    | -0.314517836 | 9.90822E-10 | 4.69256E-09 |
| PLK2      | -0.314512131 | 9.91547E-10 | 4.69488E-09 |
| BCS1L     | 0.314472848  | 9.96558E-10 | 4.71748E-09 |
| TGFBR3    | -0.314445969 | 1E-09       | 4.73266E-09 |
| TRIM39    | 0.314415308  | 1.00394E-09 | 4.75018E-09 |
| KLHL36    | -0.314386551 | 1.00765E-09 | 4.7666E-09  |
| DAG1      | -0.31437692  | 1.0089E-09  | 4.77136E-09 |
| STX12     | -0.314356205 | 1.01158E-09 | 4.78292E-09 |
| FBXL17    | -0.314311889 | 1.01735E-09 | 4.80848E-09 |
| ZNF434    | -0.314310202 | 1.01757E-09 | 4.80848E-09 |
| FAM129A   | -0.31430908  | 1.01771E-09 | 4.80848E-09 |
| RAD9A     | 0.314268838  | 1.02298E-09 | 4.83221E-09 |
| MRPL4     | 0.314217796  | 1.02969E-09 | 4.86278E-09 |
| TRIM16    | 0.314206737  | 1.03115E-09 | 4.86853E-09 |
| TNFAIP3   | -0.314164709 | 1.03672E-09 | 4.89366E-09 |
| ZNF664    | -0.314142583 | 1.03967E-09 | 4.90639E-09 |
| STOX2     | -0.314104691 | 1.04473E-09 | 4.92911E-09 |
| CRISPLD2  | -0.314094466 | 1.0461E-09  | 4.9344E-09  |
| KCNA3     | -0.314018529 | 1.05632E-09 | 4.98146E-09 |
| TXK       | -0.31400798  | 1.05775E-09 | 4.98701E-09 |
| SPRY4     | -0.313992746 | 1.05982E-09 | 4.99557E-09 |
| TMTC2     | -0.313963648 | 1.06377E-09 | 5.01303E-09 |
| BMP10     | -0.31386324  | 1.07754E-09 | 5.0767E-09  |
| VAMP8     | 0.313763797  | 1.09134E-09 | 5.14051E-09 |
| CD300E    | -0.313716055 | 1.09803E-09 | 5.17078E-09 |
| UBQLN2    | -0.313711813 | 1.09863E-09 | 5.17237E-09 |

|          |              |             |             |
|----------|--------------|-------------|-------------|
| LHFP     | -0.313699498 | 1.10036E-09 | 5.1793E-09  |
| COMTD1   | 0.31355387   | 1.12105E-09 | 5.27543E-09 |
| PSMF1    | 0.313492226  | 1.12992E-09 | 5.31591E-09 |
| FAM186B  | -0.313459957 | 1.13459E-09 | 5.33663E-09 |
| RNF41    | -0.31343758  | 1.13784E-09 | 5.35065E-09 |
| SLC39A9  | -0.313415049 | 1.14112E-09 | 5.36481E-09 |
| COL4A2   | -0.313369551 | 1.14777E-09 | 5.39482E-09 |
| MMRN1    | -0.313338163 | 1.15238E-09 | 5.41522E-09 |
| SCRN2    | 0.313308113  | 1.15682E-09 | 5.43477E-09 |
| MN1      | -0.313199009 | 1.17305E-09 | 5.50974E-09 |
| SHANK3   | -0.313151296 | 1.18022E-09 | 5.5421E-09  |
| ANKRD36B | -0.313070046 | 1.19252E-09 | 5.59813E-09 |
| ATXN3    | -0.313068803 | 1.19271E-09 | 5.59813E-09 |
| MAN2B2   | -0.31299006  | 1.20476E-09 | 5.65334E-09 |
| GATSL1   | -0.312971144 | 1.20767E-09 | 5.66567E-09 |
| CCDC73   | 0.312938805  | 1.21266E-09 | 5.68775E-09 |
| ANGPTL7  | -0.312896909 | 1.21916E-09 | 5.71688E-09 |
| TCF20    | -0.312839543 | 1.22811E-09 | 5.75751E-09 |
| MAMDC4   | -0.312803615 | 1.23375E-09 | 5.78259E-09 |
| API5     | -0.312774993 | 1.23826E-09 | 5.80236E-09 |
| FMO4     | -0.312730164 | 1.24536E-09 | 5.83425E-09 |
| TSTD1    | 0.312683099  | 1.25286E-09 | 5.86797E-09 |
| CCDC158  | -0.312661564 | 1.2563E-09  | 5.88271E-09 |
| C3orf71  | 0.312634883  | 1.26058E-09 | 5.90136E-09 |
| TNKS1BP1 | -0.312617458 | 1.26338E-09 | 5.91309E-09 |
| DULLARD  | 0.312587294  | 1.26824E-09 | 5.93447E-09 |
| PTAFR    | -0.312577154 | 1.26988E-09 | 5.94074E-09 |
| STK4     | -0.312548171 | 1.27458E-09 | 5.96132E-09 |
| DHDH     | 0.312540279  | 1.27586E-09 | 5.96591E-09 |
| THRA     | -0.312384176 | 1.30148E-09 | 6.08427E-09 |
| SATL1    | -0.312371089 | 1.30365E-09 | 6.09299E-09 |
| TUBGCP6  | -0.312369162 | 1.30397E-09 | 6.09305E-09 |
| RNF138P1 | -0.312315303 | 1.31294E-09 | 6.13353E-09 |
| CCS      | 0.312299427  | 1.3156E-09  | 6.14449E-09 |
| MRVI1    | -0.312265696 | 1.32126E-09 | 6.16948E-09 |
| SYS1     | 0.312217457  | 1.32939E-09 | 6.20601E-09 |
| POLRMT   | 0.312176866  | 1.33627E-09 | 6.23668E-09 |
| DTNB     | 0.312054415  | 1.35725E-09 | 6.33308E-09 |
| IFIH1    | -0.312045128 | 1.35885E-09 | 6.33908E-09 |
| POLA2    | 0.312010573  | 1.36484E-09 | 6.3655E-09  |
| TBX20    | -0.311992702 | 1.36794E-09 | 6.37849E-09 |
| PITPNM1  | -0.311981788 | 1.36984E-09 | 6.38585E-09 |
| C17orf56 | 0.311947145  | 1.37588E-09 | 6.41253E-09 |
| LRRC61   | 0.311927134  | 1.37939E-09 | 6.42736E-09 |
| RNFT1    | -0.31187411  | 1.38871E-09 | 6.4693E-09  |
| CCDC127  | 0.311866271  | 1.3901E-09  | 6.47423E-09 |

|           |              |             |             |
|-----------|--------------|-------------|-------------|
| ADAMTS18  | -0.311838977 | 1.39493E-09 | 6.4952E-09  |
| ACVR1B    | -0.31181316  | 1.39951E-09 | 6.51502E-09 |
| XDH       | -0.311763401 | 1.40838E-09 | 6.5548E-09  |
| LIFR      | -0.311708614 | 1.41822E-09 | 6.59902E-09 |
| LIMCH1    | -0.311562779 | 1.44472E-09 | 6.72077E-09 |
| FZD1      | -0.311495301 | 1.45715E-09 | 6.77699E-09 |
| SAAL1     | 0.311464906  | 1.46278E-09 | 6.80159E-09 |
| FERMT2    | -0.311334488 | 1.48718E-09 | 6.91343E-09 |
| SFRS18    | -0.31131943  | 1.49002E-09 | 6.92502E-09 |
| REEP2     | 0.311305047  | 1.49274E-09 | 6.93605E-09 |
| ZNF638    | -0.311284287 | 1.49667E-09 | 6.9527E-09  |
| CDC37     | 0.311207789  | 1.51126E-09 | 7.01882E-09 |
| RGS14     | 0.311172891  | 1.51796E-09 | 7.04829E-09 |
| DYNC1I2   | -0.311168937 | 1.51872E-09 | 7.05018E-09 |
| CREB3L4   | 0.311154449  | 1.52151E-09 | 7.06149E-09 |
| PSMA3     | 0.311144099  | 1.52351E-09 | 7.06911E-09 |
| ZNF717    | -0.311142017 | 1.52391E-09 | 7.06933E-09 |
| ARHGEF10L | -0.31100865  | 1.54988E-09 | 7.18812E-09 |
| KLF6      | -0.310970793 | 1.55732E-09 | 7.22098E-09 |
| PRR12     | -0.310961912 | 1.55908E-09 | 7.22743E-09 |
| SNHG12    | 0.310801885  | 1.59099E-09 | 7.37363E-09 |
| CWC27     | 0.310710967  | 1.60939E-09 | 7.45721E-09 |
| ABCA2     | -0.310697243 | 1.61219E-09 | 7.46843E-09 |
| GUCY1B3   | -0.310661608 | 1.61948E-09 | 7.50043E-09 |
| NECAB3    | 0.310619462  | 1.62813E-09 | 7.53877E-09 |
| RGS5      | -0.310519834 | 1.64877E-09 | 7.63257E-09 |
| CNST      | -0.310516636 | 1.64944E-09 | 7.63388E-09 |
| ATP7B     | -0.310466496 | 1.65993E-09 | 7.68064E-09 |
| ETNK1     | -0.310462161 | 1.66084E-09 | 7.68306E-09 |
| TMCC3     | -0.310450453 | 1.6633E-09  | 7.69265E-09 |
| LOC80154  | 0.310376644  | 1.67888E-09 | 7.76294E-09 |
| CG030     | -0.310282078 | 1.69906E-09 | 7.85442E-09 |
| EAF2      | 0.310253616  | 1.70518E-09 | 7.88088E-09 |
| ZNRF2     | -0.310217824 | 1.71291E-09 | 7.91475E-09 |
| GALNTL2   | -0.310153384 | 1.7269E-09  | 7.97756E-09 |
| SPATA18   | -0.310115868 | 1.7351E-09  | 8.01357E-09 |
| NAIF1     | 0.310030393  | 1.75392E-09 | 8.09862E-09 |
| ZFP92     | -0.309976957 | 1.76579E-09 | 8.15152E-09 |
| TMEM60    | 0.309895684  | 1.78398E-09 | 8.23362E-09 |
| PLXNB2    | -0.309879612 | 1.7876E-09  | 8.24841E-09 |
| MUT       | -0.30985756  | 1.79258E-09 | 8.26947E-09 |
| EDEM3     | -0.309797462 | 1.80622E-09 | 8.33045E-09 |
| CLEC2L    | 0.309777008  | 1.81088E-09 | 8.35002E-09 |
| FAM41C    | 0.309683225  | 1.83242E-09 | 8.44737E-09 |
| CEP170L   | -0.309633472 | 1.84394E-09 | 8.49853E-09 |
| C11orf2   | 0.309534039  | 1.86719E-09 | 8.60367E-09 |

|          |              |             |             |
|----------|--------------|-------------|-------------|
| ZCCHC8   | -0.309475923 | 1.88091E-09 | 8.66487E-09 |
| HARS     | 0.30946047   | 1.88457E-09 | 8.67974E-09 |
| PLDN     | -0.309435714 | 1.89045E-09 | 8.70483E-09 |
| ANKRD42  | -0.309351543 | 1.91059E-09 | 8.79553E-09 |
| SNORD17  | 0.309286288  | 1.92635E-09 | 8.86601E-09 |
| TNFRSF18 | 0.309280328  | 1.92779E-09 | 8.87062E-09 |
| ZNF771   | 0.309203447  | 1.94653E-09 | 8.95477E-09 |
| AFG3L2   | -0.309172603 | 1.9541E-09  | 8.98751E-09 |
| EIF3C    | -0.309090093 | 1.97449E-09 | 9.07917E-09 |
| SLC4A7   | -0.309061387 | 1.98163E-09 | 9.10989E-09 |
| PIGH     | 0.30904463   | 1.9858E-09  | 9.127E-09   |
| ZNF425   | -0.309031571 | 1.98907E-09 | 9.13989E-09 |
| NIPAL2   | -0.309028669 | 1.98979E-09 | 9.14112E-09 |
| DCUN1D5  | 0.309022088  | 1.99144E-09 | 9.14657E-09 |
| LRRC2    | -0.308860603 | 2.03227E-09 | 9.33195E-09 |
| KANK1    | -0.308856632 | 2.03329E-09 | 9.33446E-09 |
| THBS2    | -0.308815967 | 2.0437E-09  | 9.38011E-09 |
| PIGK     | -0.308811278 | 2.0449E-09  | 9.38347E-09 |
| PGGT1B   | -0.308749175 | 2.06092E-09 | 9.45478E-09 |
| SFN      | 0.308720942  | 2.06824E-09 | 9.48617E-09 |
| PCMTD2   | -0.308711502 | 2.07069E-09 | 9.49524E-09 |
| ORAI1    | 0.308673963  | 2.08047E-09 | 9.5379E-09  |
| TSPYL5   | -0.308669526 | 2.08163E-09 | 9.54102E-09 |
| CCDC163P | -0.308603263 | 2.09902E-09 | 9.61851E-09 |
| HEBP2    | 0.308503157  | 2.12556E-09 | 9.73787E-09 |
| GUCY1A2  | -0.308489242 | 2.12927E-09 | 9.75264E-09 |
| TUBGCP5  | -0.308483678 | 2.13076E-09 | 9.75721E-09 |
| RARB     | -0.308467404 | 2.13512E-09 | 9.7749E-09  |
| DEAF1    | 0.308396688  | 2.15414E-09 | 9.85973E-09 |
| CCDC144A | -0.308391083 | 2.15566E-09 | 9.8644E-09  |
| UPF2     | -0.308363955 | 2.163E-09   | 9.89575E-09 |
| ABCD3    | -0.308355601 | 2.16527E-09 | 9.90384E-09 |
| PLAA     | -0.308286733 | 2.18405E-09 | 9.98744E-09 |
| IGSF10   | -0.308259685 | 2.19147E-09 | 1.00191E-08 |
| CAMLG    | 0.308178253  | 2.21395E-09 | 1.01195E-08 |
| DLD      | -0.308174218 | 2.21507E-09 | 1.01223E-08 |
| ZFHX4    | -0.308137775 | 2.22521E-09 | 1.01663E-08 |
| ANKH     | -0.308114859 | 2.23161E-09 | 1.01932E-08 |
| ZNF708   | -0.308102771 | 2.23499E-09 | 1.02063E-08 |
| PUM1     | -0.307941404 | 2.28062E-09 | 1.04123E-08 |
| TXNDC12  | 0.307932666  | 2.28312E-09 | 1.04213E-08 |
| PHRF1    | -0.307877903 | 2.29882E-09 | 1.04906E-08 |
| PELI1    | -0.30784774  | 2.30752E-09 | 1.05279E-08 |
| HSF2BP   | 0.307791065  | 2.32394E-09 | 1.06004E-08 |
| SLFN12   | -0.307778141 | 2.32771E-09 | 1.06151E-08 |
| SYT9     | -0.307760999 | 2.3327E-09  | 1.06355E-08 |

|           |              |             |             |
|-----------|--------------|-------------|-------------|
| TMEM33    | -0.307754882 | 2.33449E-09 | 1.06412E-08 |
| CDC42EP2  | 0.307732808  | 2.34095E-09 | 1.06682E-08 |
| PDE1C     | -0.307712576 | 2.34688E-09 | 1.06928E-08 |
| NHS       | -0.307677807 | 2.35711E-09 | 1.07348E-08 |
| DGCR14    | 0.307677573  | 2.35718E-09 | 1.07348E-08 |
| SMAD6     | -0.307670579 | 2.35924E-09 | 1.0741E-08  |
| LOC80054  | 0.307669265  | 2.35963E-09 | 1.0741E-08  |
| LOC402377 | -0.307634771 | 2.36983E-09 | 1.0785E-08  |
| PCDHGA10  | -0.30760206  | 2.37955E-09 | 1.08267E-08 |
| DLGAP2    | -0.307528001 | 2.40168E-09 | 1.09232E-08 |
| CDC37L1   | -0.307527497 | 2.40183E-09 | 1.09232E-08 |
| APPBP2    | -0.307509789 | 2.40716E-09 | 1.09449E-08 |
| SIAE      | -0.307473936 | 2.41797E-09 | 1.09915E-08 |
| SPIRE2    | 0.307324414  | 2.46357E-09 | 1.11963E-08 |
| GPR37     | -0.30729163  | 2.47368E-09 | 1.12396E-08 |
| RCCD1     | 0.307234107  | 2.49151E-09 | 1.13181E-08 |
| MFN2      | -0.306993691 | 2.56742E-09 | 1.16602E-08 |
| PIF1      | 0.306986228  | 2.56981E-09 | 1.16684E-08 |
| MYH10     | -0.306886583 | 2.60195E-09 | 1.18117E-08 |
| HAUS5     | 0.306876636  | 2.60518E-09 | 1.18236E-08 |
| GRN       | 0.306867521  | 2.60814E-09 | 1.18344E-08 |
| RGS18     | -0.306835862 | 2.61846E-09 | 1.18785E-08 |
| TACO1     | 0.306821715  | 2.62308E-09 | 1.18968E-08 |
| CTRL      | 0.306817193  | 2.62456E-09 | 1.19008E-08 |
| C22orf27  | 0.306807132  | 2.62786E-09 | 1.1913E-08  |
| POM121L9P | -0.306781011 | 2.63643E-09 | 1.19491E-08 |
| CCRN4L    | -0.306759807 | 2.64341E-09 | 1.1978E-08  |
| SHOC2     | -0.306749126 | 2.64693E-09 | 1.19913E-08 |
| WBP11P1   | -0.306745274 | 2.6482E-09  | 1.19943E-08 |
| HEMK1     | 0.30667009   | 2.67313E-09 | 1.21045E-08 |
| CEP110    | -0.306493303 | 2.73265E-09 | 1.23712E-08 |
| CDK14     | -0.306460783 | 2.74374E-09 | 1.24185E-08 |
| RPS6KB2   | 0.306447508  | 2.74828E-09 | 1.24363E-08 |
| SNX1      | -0.306402862 | 2.7636E-09  | 1.25027E-08 |
| CHEK2     | 0.306386539  | 2.76922E-09 | 1.25253E-08 |
| PAMR1     | -0.30631353  | 2.7945E-09  | 1.26368E-08 |
| TAS2R14   | -0.306310137 | 2.79568E-09 | 1.26393E-08 |
| SPCS2     | 0.306263697  | 2.81188E-09 | 1.27096E-08 |
| CP110     | -0.30625563  | 2.8147E-09  | 1.27195E-08 |
| MGC16275  | 0.306241079  | 2.8198E-09  | 1.27397E-08 |
| RABGEF1   | 0.306199965  | 2.83426E-09 | 1.28021E-08 |
| DHH       | -0.306153243 | 2.85078E-09 | 1.28738E-08 |
| AGAP11    | -0.306126997 | 2.8601E-09  | 1.29129E-08 |
| PGM5P2    | -0.306101532 | 2.86917E-09 | 1.2951E-08  |
| BAG5      | -0.306096207 | 2.87107E-09 | 1.29566E-08 |
| KIF21A    | -0.306021021 | 2.89804E-09 | 1.30753E-08 |



|           |              |             |             |
|-----------|--------------|-------------|-------------|
| RABGGTB   | 0.306001369  | 2.90513E-09 | 1.31043E-08 |
| NOL11     | 0.305992945  | 2.90817E-09 | 1.31151E-08 |
| LRRC55    | -0.305888628 | 2.94612E-09 | 1.32832E-08 |
| SLFN12L   | -0.305806669 | 2.97626E-09 | 1.34161E-08 |
| UBOX5     | 0.305749004  | 2.99766E-09 | 1.3508E-08  |
| MSL2      | -0.305748083 | 2.998E-09   | 1.3508E-08  |
| VOPP1     | 0.305744401  | 2.99937E-09 | 1.35111E-08 |
| LOC100286 | 0.305686493  | 3.02101E-09 | 1.36055E-08 |
| CAPN12    | 0.305593809  | 3.05597E-09 | 1.37598E-08 |
| EIF5AL1   | 0.30551172   | 3.08726E-09 | 1.38976E-08 |
| C19orf22  | 0.305441392  | 3.11431E-09 | 1.40162E-08 |
| PDE1A     | -0.305409523 | 3.12665E-09 | 1.40685E-08 |
| ELL3      | 0.305287948  | 3.17414E-09 | 1.4279E-08  |
| LHX6      | -0.30526852  | 3.18179E-09 | 1.43102E-08 |
| PTPRF     | -0.305230051 | 3.197E-09   | 1.43753E-08 |
| FBXL4     | -0.305134978 | 3.23488E-09 | 1.45424E-08 |
| PEX3      | -0.305099665 | 3.24907E-09 | 1.46028E-08 |
| KIAA1462  | -0.305097613 | 3.24989E-09 | 1.46033E-08 |
| SPRED1    | -0.305057393 | 3.26612E-09 | 1.46729E-08 |
| TIMP3     | -0.30502018  | 3.28121E-09 | 1.47373E-08 |
| UBQLN1    | -0.304952415 | 3.30886E-09 | 1.48582E-08 |
| MGC23284  | 0.304945379  | 3.31174E-09 | 1.48678E-08 |
| SLC40A1   | -0.304928026 | 3.31887E-09 | 1.48964E-08 |
| TECR      | 0.304914526  | 3.32442E-09 | 1.49179E-08 |
| PPP1R13B  | -0.304815266 | 3.36551E-09 | 1.50989E-08 |
| TP53TG1   | 0.304713081  | 3.40833E-09 | 1.52876E-08 |
| PCDHB10   | -0.304659364 | 3.43105E-09 | 1.5386E-08  |
| FAM126A   | -0.30463413  | 3.44177E-09 | 1.54306E-08 |
| EXO1      | 0.30458671   | 3.46201E-09 | 1.55179E-08 |
| RYBP      | -0.304568861 | 3.46966E-09 | 1.55487E-08 |
| SLC25A43  | -0.304563889 | 3.47179E-09 | 1.55547E-08 |
| MITF      | -0.304499104 | 3.49971E-09 | 1.56763E-08 |
| PCNA      | 0.30448094   | 3.50757E-09 | 1.5708E-08  |
| ZSCAN23   | -0.30443734  | 3.52652E-09 | 1.57893E-08 |
| PPP1CB    | -0.304429956 | 3.52974E-09 | 1.58001E-08 |
| SYTL5     | -0.304422152 | 3.53315E-09 | 1.58118E-08 |
| COPS3     | 0.30434386   | 3.56749E-09 | 1.59619E-08 |
| IFI30     | 0.304337256  | 3.5704E-09  | 1.59714E-08 |
| FUNDC2    | 0.304312566  | 3.5813E-09  | 1.60165E-08 |
| NUP160    | -0.304310354 | 3.58228E-09 | 1.60173E-08 |
| GOSR1     | -0.304226932 | 3.61938E-09 | 1.61795E-08 |
| ZC3H14    | -0.304209346 | 3.62724E-09 | 1.62111E-08 |
| PROCA1    | 0.304135378  | 3.66052E-09 | 1.63561E-08 |
| C1orf124  | -0.304051221 | 3.69873E-09 | 1.65232E-08 |
| PHKG2     | 0.304031158  | 3.7079E-09  | 1.65604E-08 |
| C5orf39   | 0.303934194  | 3.75251E-09 | 1.67559E-08 |

|          |              |             |             |
|----------|--------------|-------------|-------------|
| EGR1     | -0.30391334  | 3.76218E-09 | 1.67953E-08 |
| SLC5A11  | 0.303900631  | 3.76808E-09 | 1.68179E-08 |
| ENTPD5   | -0.303878863 | 3.77821E-09 | 1.68593E-08 |
| KIAA1217 | -0.303842804 | 3.79504E-09 | 1.69306E-08 |
| THAP10   | -0.303805121 | 3.81271E-09 | 1.70056E-08 |
| THOP1    | 0.303788494  | 3.82054E-09 | 1.70367E-08 |
| TRABD    | 0.303766932  | 3.8307E-09  | 1.70782E-08 |
| FAM26E   | -0.303693705 | 3.86543E-09 | 1.72292E-08 |
| ZNF268   | -0.303603215 | 3.90876E-09 | 1.74184E-08 |
| IFT27    | 0.303600828  | 3.90991E-09 | 1.74197E-08 |
| FAM65B   | -0.303595913 | 3.91228E-09 | 1.74263E-08 |
| HADHB    | -0.303529846 | 3.94424E-09 | 1.75626E-08 |
| CX3CR1   | -0.303529023 | 3.94464E-09 | 1.75626E-08 |
| TOMM40L  | 0.303480134  | 3.96846E-09 | 1.76647E-08 |
| SIK3     | -0.303443823 | 3.98624E-09 | 1.77399E-08 |
| DDOST    | 0.303401228  | 4.0072E-09  | 1.78292E-08 |
| DPYD     | -0.303293906 | 4.06047E-09 | 1.80622E-08 |
| ITGBL1   | -0.303205548 | 4.10485E-09 | 1.82555E-08 |
| PLAGL1   | -0.30309891  | 4.15903E-09 | 1.84923E-08 |
| LRRTM2   | -0.303096427 | 4.1603E-09  | 1.84938E-08 |
| LZTS1    | -0.303090877 | 4.16314E-09 | 1.85023E-08 |
| KPNA6    | -0.303083341 | 4.167E-09   | 1.85153E-08 |
| AP1S1    | 0.30288432   | 4.27017E-09 | 1.89695E-08 |
| RABEP1   | -0.302880767 | 4.27203E-09 | 1.89736E-08 |
| ADCY4    | -0.30284262  | 4.2921E-09  | 1.90584E-08 |
| PGAM4    | -0.302820064 | 4.304E-09   | 1.9107E-08  |
| KRT8     | 0.302812565  | 4.30797E-09 | 1.91204E-08 |
| HSPA1B   | 0.302706774  | 4.36429E-09 | 1.93661E-08 |
| BAI3     | -0.302691218 | 4.37263E-09 | 1.93988E-08 |
| ZNF426   | -0.302685093 | 4.37592E-09 | 1.9409E-08  |
| NVL      | 0.302610492  | 4.41617E-09 | 1.95832E-08 |
| FAM83C   | 0.302563141  | 4.44191E-09 | 1.96929E-08 |
| OGDH     | -0.302435154 | 4.51219E-09 | 2.00001E-08 |
| KIAA0892 | -0.302423499 | 4.51865E-09 | 2.00242E-08 |
| C3orf70  | -0.302349664 | 4.55974E-09 | 2.02018E-08 |
| LAMP2    | -0.302332734 | 4.56921E-09 | 2.02393E-08 |
| ANK3     | -0.302311545 | 4.5811E-09  | 2.02849E-08 |
| NPY5R    | -0.302310729 | 4.58155E-09 | 2.02849E-08 |
| IFI16    | -0.302197741 | 4.64543E-09 | 2.05632E-08 |
| GNB4     | -0.302170442 | 4.661E-09   | 2.06275E-08 |
| GRAPL    | -0.302121675 | 4.68893E-09 | 2.07465E-08 |
| MERTK    | -0.302118577 | 4.69071E-09 | 2.07498E-08 |
| NEK2     | 0.302100326  | 4.7012E-09  | 2.07916E-08 |
| HINT2    | 0.302092637  | 4.70563E-09 | 2.08065E-08 |
| ZNF500   | -0.302067004 | 4.72043E-09 | 2.08673E-08 |
| HEXDC    | 0.302061624  | 4.72354E-09 | 2.08764E-08 |

|           |              |             |             |
|-----------|--------------|-------------|-------------|
| TMEM38B   | -0.302011278 | 4.75275E-09 | 2.10009E-08 |
| MKKS      | 0.301944114  | 4.79199E-09 | 2.11696E-08 |
| C11orf17  | 0.301928089  | 4.8014E-09  | 2.12064E-08 |
| SMURF1    | -0.301855028 | 4.84452E-09 | 2.13922E-08 |
| FAM163B   | -0.301849717 | 4.84767E-09 | 2.14013E-08 |
| CGGBP1    | -0.301802833 | 4.87556E-09 | 2.15197E-08 |
| ZACN      | 0.30175491   | 4.90422E-09 | 2.16414E-08 |
| PIR       | 0.301740831  | 4.91268E-09 | 2.16739E-08 |
| UCN       | 0.301734332  | 4.91658E-09 | 2.16863E-08 |
| HBP1      | -0.30170552  | 4.93394E-09 | 2.17581E-08 |
| SOX6      | -0.301644678 | 4.97078E-09 | 2.19157E-08 |
| GLIS3     | -0.301590651 | 5.00372E-09 | 2.20519E-08 |
| TMED1     | 0.301590358  | 5.0039E-09  | 2.20519E-08 |
| AHCYL1    | -0.301567466 | 5.01792E-09 | 2.21088E-08 |
| RRS1      | 0.301515342  | 5.04999E-09 | 2.22452E-08 |
| BRIP1     | -0.301427074 | 5.10475E-09 | 2.24815E-08 |
| C6orf134  | 0.301405169  | 5.11843E-09 | 2.25367E-08 |
| HSPA4     | 0.301386134  | 5.13035E-09 | 2.25842E-08 |
| YY1       | -0.301381243 | 5.13341E-09 | 2.25927E-08 |
| SLC30A5   | -0.301339762 | 5.15948E-09 | 2.27024E-08 |
| KLHL4     | -0.301277675 | 5.19875E-09 | 2.28701E-08 |
| FBXO43    | 0.301251832  | 5.21518E-09 | 2.29373E-08 |
| C15orf28  | -0.301205503 | 5.24476E-09 | 2.30603E-08 |
| FBXO46    | 0.301204405  | 5.24546E-09 | 2.30603E-08 |
| OAZ3      | 0.30119769   | 5.24976E-09 | 2.30742E-08 |
| ERGIC1    | -0.301190137 | 5.2546E-09  | 2.30903E-08 |
| SSB       | 0.301182981  | 5.25919E-09 | 2.31054E-08 |
| PDZRN3    | -0.301153241 | 5.27832E-09 | 2.31843E-08 |
| GPR89B    | -0.301133228 | 5.29122E-09 | 2.32359E-08 |
| COX4NB    | 0.301053069  | 5.34323E-09 | 2.34591E-08 |
| COX7B     | 0.301038867  | 5.35249E-09 | 2.34946E-08 |
| ITGAE     | 0.300990129  | 5.38441E-09 | 2.36295E-08 |
| PCDH7     | -0.30084809  | 5.47847E-09 | 2.4037E-08  |
| C6orf174  | -0.300777088 | 5.52608E-09 | 2.42405E-08 |
| C1orf122  | 0.300738631  | 5.55204E-09 | 2.4349E-08  |
| C20orf152 | 0.300694126  | 5.58223E-09 | 2.4476E-08  |
| ARF6      | -0.300692298 | 5.58347E-09 | 2.44761E-08 |
| KLHL7     | -0.300650604 | 5.6119E-09  | 2.45953E-08 |
| GUSBL1    | -0.300638412 | 5.62024E-09 | 2.46264E-08 |
| IRGQ      | 0.300635789  | 5.62204E-09 | 2.46289E-08 |
| ZBTB8A    | -0.30061055  | 5.63935E-09 | 2.46993E-08 |
| ZNF567    | -0.300572036 | 5.66586E-09 | 2.48099E-08 |
| ANGPT4    | -0.300466137 | 5.73938E-09 | 2.51263E-08 |
| RASSF2    | -0.300407693 | 5.78035E-09 | 2.53001E-08 |
| SGPL1     | -0.300403984 | 5.78296E-09 | 2.5306E-08  |
| KCNE1     | -0.300333293 | 5.83291E-09 | 2.5519E-08  |

|           |              |             |             |
|-----------|--------------|-------------|-------------|
| RPN2      | 0.300293574  | 5.86116E-09 | 2.5637E-08  |
| BACH1     | -0.300237275 | 5.90144E-09 | 2.58074E-08 |
| MRPL19    | -0.300177301 | 5.94463E-09 | 2.59906E-08 |
| SRPX      | -0.300169189 | 5.9505E-09  | 2.60106E-08 |
| ZNF254    | -0.300105519 | 5.99673E-09 | 2.62069E-08 |
| SUPT5H    | 0.300097833  | 6.00234E-09 | 2.62257E-08 |
| SIKE1     | -0.300093424 | 6.00556E-09 | 2.6234E-08  |
| C19orf60  | 0.300044082  | 6.04168E-09 | 2.6386E-08  |
| ARCN1     | -0.300035897 | 6.04769E-09 | 2.64064E-08 |
| NSMCE4A   | 0.300027097  | 6.05416E-09 | 2.64289E-08 |
| RIC8B     | -0.299995034 | 6.0778E-09  | 2.65263E-08 |
| CD274     | -0.299990626 | 6.08105E-09 | 2.65346E-08 |
| MFAP3L    | -0.299960717 | 6.10319E-09 | 2.66254E-08 |
| FDPS      | 0.299948459  | 6.11228E-09 | 2.66592E-08 |
| PSMA2     | 0.299908227  | 6.14223E-09 | 2.6784E-08  |
| ACVR1     | -0.299830859 | 6.20021E-09 | 2.70309E-08 |
| DUSP22    | 0.299783397  | 6.23604E-09 | 2.71812E-08 |
| LPP       | -0.299758187 | 6.25516E-09 | 2.72585E-08 |
| SLC25A1   | 0.299749164  | 6.26201E-09 | 2.72824E-08 |
| SRGAP1    | -0.299746802 | 6.26381E-09 | 2.72843E-08 |
| HTR7      | -0.299735842 | 6.27215E-09 | 2.73146E-08 |
| ZNF718    | -0.299647239 | 6.33995E-09 | 2.76039E-08 |
| PDE4DIP   | -0.299618298 | 6.36226E-09 | 2.76949E-08 |
| JUND      | 0.299613207  | 6.36619E-09 | 2.7706E-08  |
| DNAJC2    | 0.299567884  | 6.40129E-09 | 2.78527E-08 |
| KLHDC8B   | 0.299429797  | 6.50939E-09 | 2.83168E-08 |
| PI4KA     | -0.299379685 | 6.54905E-09 | 2.84832E-08 |
| TRIM62    | -0.299358108 | 6.5662E-09  | 2.85515E-08 |
| NIPSNAP3A | -0.299310921 | 6.60386E-09 | 2.8709E-08  |
| SULT1C4   | -0.299242154 | 6.65912E-09 | 2.89429E-08 |
| CTAGE5    | -0.299198668 | 6.69429E-09 | 2.90894E-08 |
| ATF1      | -0.299186409 | 6.70424E-09 | 2.91208E-08 |
| LDB3      | -0.299186167 | 6.70443E-09 | 2.91208E-08 |
| KIAA0922  | -0.299160851 | 6.72502E-09 | 2.92038E-08 |
| CHRM2     | -0.299147534 | 6.73588E-09 | 2.92446E-08 |
| RNF114    | 0.299012192  | 6.84717E-09 | 2.97213E-08 |
| DCLK1     | -0.298931428 | 6.91442E-09 | 3.00067E-08 |
| LOC648740 | -0.298885129 | 6.95327E-09 | 3.01687E-08 |
| ZMYM1     | -0.298821224 | 7.00723E-09 | 3.03962E-08 |
| GALE      | 0.298818122  | 7.00986E-09 | 3.0401E-08  |
| CYP2C8    | -0.29878428  | 7.03861E-09 | 3.0519E-08  |
| PLCXD3    | -0.298739601 | 7.07675E-09 | 3.06777E-08 |
| CDK2AP2   | 0.298727884  | 7.08678E-09 | 3.07145E-08 |
| UTRN      | -0.298666394 | 7.13966E-09 | 3.0937E-08  |
| TAGAP     | -0.298607805 | 7.1904E-09  | 3.11501E-08 |
| ZNF394    | 0.298595134  | 7.20142E-09 | 3.1191E-08  |

|          |              |             |             |
|----------|--------------|-------------|-------------|
| MESTIT1  | -0.298590867 | 7.20514E-09 | 3.12003E-08 |
| SNHG1    | 0.298571925  | 7.22165E-09 | 3.1265E-08  |
| KIAA0649 | -0.298521375 | 7.26589E-09 | 3.14497E-08 |
| UBD      | 0.298423383  | 7.35241E-09 | 3.18173E-08 |
| IFITM3   | 0.298378171  | 7.39267E-09 | 3.19846E-08 |
| RBM33    | -0.298374361 | 7.39607E-09 | 3.19923E-08 |
| MAPKAPK5 | 0.298367045  | 7.4026E-09  | 3.20137E-08 |
| FAM13A   | -0.298307452 | 7.45606E-09 | 3.22378E-08 |
| CPNE1    | 0.29828563   | 7.47572E-09 | 3.23158E-08 |
| CXCL17   | 0.298246995  | 7.51067E-09 | 3.24598E-08 |
| GNA13    | -0.298221369 | 7.53393E-09 | 3.25533E-08 |
| ZMYM4    | -0.29816333  | 7.58688E-09 | 3.2775E-08  |
| AP1M2    | 0.298085393  | 7.65855E-09 | 3.30774E-08 |
| ZNF346   | 0.298081411  | 7.66223E-09 | 3.30861E-08 |
| ZNF660   | -0.298057756 | 7.68412E-09 | 3.31735E-08 |
| DNAJC14  | -0.298021727 | 7.71758E-09 | 3.33107E-08 |
| ITPKB    | -0.297982296 | 7.75436E-09 | 3.34622E-08 |
| EIF5     | -0.297959069 | 7.77611E-09 | 3.35488E-08 |
| ELTD1    | -0.297938633 | 7.79529E-09 | 3.36243E-08 |
| PAFAH1B1 | -0.297926035 | 7.80714E-09 | 3.36681E-08 |
| ARMC8    | -0.297900624 | 7.83109E-09 | 3.3764E-08  |
| JMY      | -0.297843604 | 7.88509E-09 | 3.39895E-08 |
| ALDOA    | 0.297839817  | 7.88869E-09 | 3.39977E-08 |
| ZNF799   | -0.297708239 | 8.01474E-09 | 3.45334E-08 |
| B4GALT1  | -0.297613812 | 8.10639E-09 | 3.49208E-08 |
| ACP6     | 0.297551398  | 8.16753E-09 | 3.51766E-08 |
| ALKBH8   | -0.297547024 | 8.17183E-09 | 3.51875E-08 |
| GPC3     | 0.297519628  | 8.19882E-09 | 3.52961E-08 |
| PPP2R2A  | -0.297504909 | 8.21336E-09 | 3.5351E-08  |
| DUS3L    | 0.297496141  | 8.22203E-09 | 3.53807E-08 |
| C4orf52  | 0.297491965  | 8.22617E-09 | 3.53908E-08 |
| PPARA    | -0.297486016 | 8.23206E-09 | 3.54085E-08 |
| HIST1H4J | 0.297431278  | 8.28646E-09 | 3.56348E-08 |
| CST3     | 0.297375495  | 8.34225E-09 | 3.5867E-08  |
| ST20     | 0.297352677  | 8.36518E-09 | 3.59578E-08 |
| KIAA0556 | -0.297290136 | 8.42834E-09 | 3.62215E-08 |
| ZNF592   | -0.297248904 | 8.47023E-09 | 3.63937E-08 |
| SKP1     | 0.297236115  | 8.48326E-09 | 3.64418E-08 |
| PKD1L3   | -0.297215587 | 8.50423E-09 | 3.6524E-08  |
| FAM38A   | -0.297180126 | 8.54055E-09 | 3.66721E-08 |
| CDK1     | 0.297163794  | 8.55734E-09 | 3.67362E-08 |
| RALGAPB  | -0.297153035 | 8.56841E-09 | 3.67734E-08 |
| UMPS     | 0.297151804  | 8.56968E-09 | 3.67734E-08 |
| ANKRD11  | -0.29711588  | 8.60676E-09 | 3.69245E-08 |
| PABPC1   | 0.297079797  | 8.64415E-09 | 3.7077E-08  |
| TUBG1    | 0.296982617  | 8.74566E-09 | 3.75043E-08 |

|           |              |             |             |
|-----------|--------------|-------------|-------------|
| DIXDC1    | -0.296916626 | 8.81525E-09 | 3.77945E-08 |
| TRIM65    | 0.296907827  | 8.82457E-09 | 3.78264E-08 |
| DEFB132   | -0.296892383 | 8.84095E-09 | 3.78884E-08 |
| ARHGEF11  | -0.296771624 | 8.97004E-09 | 3.84334E-08 |
| BDNFOS    | -0.296763584 | 8.9787E-09  | 3.84622E-08 |
| SPCS3     | -0.296745039 | 8.9987E-09  | 3.85396E-08 |
| KCNK7     | 0.296695797  | 9.05203E-09 | 3.87597E-08 |
| ALG1L     | 0.296670284  | 9.07978E-09 | 3.88701E-08 |
| DIDO1     | -0.296637284 | 9.11579E-09 | 3.90159E-08 |
| AKIRIN1   | -0.29661779  | 9.13713E-09 | 3.90988E-08 |
| LOC646214 | -0.296568884 | 9.19088E-09 | 3.93204E-08 |
| TOMM20L   | 0.29648711   | 9.28144E-09 | 3.96993E-08 |
| BTN2A3    | -0.296470627 | 9.2998E-09  | 3.97625E-08 |
| MEF2C     | -0.296470251 | 9.30022E-09 | 3.97625E-08 |
| MRPL18    | 0.296468141  | 9.30257E-09 | 3.97641E-08 |
| CHD8      | -0.296448998 | 9.32394E-09 | 3.98469E-08 |
| KIAA0232  | -0.29643829  | 9.33592E-09 | 3.98895E-08 |
| GSTCD     | -0.296408343 | 9.36949E-09 | 4.00243E-08 |
| DBR1      | -0.296399093 | 9.37988E-09 | 4.00601E-08 |
| PITPNM3   | -0.296388694 | 9.39158E-09 | 4.01015E-08 |
| SFRS2B    | -0.296372833 | 9.40944E-09 | 4.01691E-08 |
| ANXA3     | -0.296369313 | 9.41341E-09 | 4.01775E-08 |
| C19orf18  | 0.296341076  | 9.44532E-09 | 4.0305E-08  |
| POLD4     | 0.29633548   | 9.45165E-09 | 4.03234E-08 |
| LRRC4     | -0.2963218   | 9.46716E-09 | 4.03785E-08 |
| CCDC123   | 0.296320508  | 9.46862E-09 | 4.03785E-08 |
| CDKL1     | -0.296203269 | 9.60252E-09 | 4.09408E-08 |
| HIST1H3C  | 0.296177644  | 9.63203E-09 | 4.10578E-08 |
| LOC728875 | 0.296162141  | 9.64993E-09 | 4.1123E-08  |
| IL13RA1   | -0.296160816 | 9.65146E-09 | 4.1123E-08  |
| FAM66D    | 0.296063495  | 9.76456E-09 | 4.15821E-08 |
| SEMA4B    | -0.296062943 | 9.76521E-09 | 4.15821E-08 |
| SLC9A3R1  | 0.296062708  | 9.76548E-09 | 4.15821E-08 |
| SULF2     | -0.296030591 | 9.80309E-09 | 4.17333E-08 |
| CBY1      | 0.296011893  | 9.82505E-09 | 4.18179E-08 |
| RETSAT    | -0.295941309 | 9.90838E-09 | 4.21635E-08 |
| CYB5R4    | -0.29590169  | 9.95545E-09 | 4.23548E-08 |
| KCMF1     | 0.295866501  | 9.99744E-09 | 4.25243E-08 |
| TBCK      | -0.295844747 | 1.00235E-08 | 4.2626E-08  |
| XPC       | -0.295774729 | 1.01077E-08 | 4.29752E-08 |
| C14orf104 | -0.295707715 | 1.0189E-08  | 4.33116E-08 |
| AEBP2     | -0.29568082  | 1.02219E-08 | 4.34418E-08 |
| HIST1H2AH | 0.295672791  | 1.02317E-08 | 4.34742E-08 |
| PNKP      | 0.295654407  | 1.02542E-08 | 4.35605E-08 |
| DERL2     | 0.295594712  | 1.03276E-08 | 4.3863E-08  |
| SIPA1L3   | -0.295585057 | 1.03395E-08 | 4.39042E-08 |

|          |              |             |             |
|----------|--------------|-------------|-------------|
| ZFYVE26  | -0.295539293 | 1.03962E-08 | 4.41355E-08 |
| THOC3    | 0.295533887  | 1.04029E-08 | 4.41546E-08 |
| ELK4     | -0.295525661 | 1.04131E-08 | 4.41886E-08 |
| ROS1     | -0.295489624 | 1.0458E-08  | 4.43697E-08 |
| SLC6A1   | -0.295482638 | 1.04668E-08 | 4.43973E-08 |
| ASPA     | -0.295366316 | 1.06131E-08 | 4.50086E-08 |
| RASSF6   | -0.295331052 | 1.06579E-08 | 4.51889E-08 |
| TIGD3    | 0.295318913  | 1.06733E-08 | 4.52447E-08 |
| DZIP1    | -0.295289141 | 1.07113E-08 | 4.53961E-08 |
| LRRC4C   | -0.295244261 | 1.07689E-08 | 4.56302E-08 |
| TP53BP1  | -0.295240003 | 1.07743E-08 | 4.56436E-08 |
| SEC11A   | 0.295235762  | 1.07798E-08 | 4.5657E-08  |
| WAPAL    | -0.29521762  | 1.08031E-08 | 4.57462E-08 |
| RPAIN    | 0.295152451  | 1.08874E-08 | 4.60934E-08 |
| ZNF558   | -0.295140957 | 1.09024E-08 | 4.61463E-08 |
| JAG1     | -0.295139266 | 1.09046E-08 | 4.61463E-08 |
| ENG      | -0.295049744 | 1.10216E-08 | 4.66317E-08 |
| PCDHGB8P | -0.29503539  | 1.10405E-08 | 4.67016E-08 |
| FAM134C  | 0.295030702  | 1.10467E-08 | 4.67178E-08 |
| UBR4     | -0.294967383 | 1.11303E-08 | 4.70618E-08 |
| FHL2     | -0.294932307 | 1.1177E-08  | 4.72489E-08 |
| FLJ13197 | -0.294871472 | 1.12583E-08 | 4.75825E-08 |
| C2orf29  | 0.294812049  | 1.13383E-08 | 4.79104E-08 |
| SDK1     | -0.294788121 | 1.13706E-08 | 4.80369E-08 |
| NQO2     | 0.294763757  | 1.14037E-08 | 4.81663E-08 |
| DNAJB9   | -0.294752382 | 1.14191E-08 | 4.82213E-08 |
| RPL36A   | 0.294610146  | 1.16141E-08 | 4.90345E-08 |
| DNAJC3   | -0.294598251 | 1.16306E-08 | 4.90935E-08 |
| MAD1L1   | 0.294576688  | 1.16605E-08 | 4.92092E-08 |
| MYH11    | -0.294553076 | 1.16933E-08 | 4.93373E-08 |
| HIST1H4C | 0.294527821  | 1.17285E-08 | 4.94753E-08 |
| IPO7     | -0.294385577 | 1.19286E-08 | 5.03088E-08 |
| C5orf25  | -0.294379231 | 1.19376E-08 | 5.03362E-08 |
| EXOSC3   | 0.294338792  | 1.19952E-08 | 5.05681E-08 |
| ASAH2    | -0.294309145 | 1.20375E-08 | 5.07359E-08 |
| TMEM85   | 0.294295676  | 1.20568E-08 | 5.08065E-08 |
| VGLL4    | -0.294252995 | 1.21181E-08 | 5.10541E-08 |
| DHX15    | -0.294192247 | 1.22059E-08 | 5.14131E-08 |
| APPL1    | -0.29417095  | 1.22369E-08 | 5.15325E-08 |
| CHST13   | 0.29406295   | 1.23949E-08 | 5.21869E-08 |
| INTS8    | 0.294058061  | 1.24021E-08 | 5.22061E-08 |
| PKD1     | -0.293880232 | 1.26667E-08 | 5.3304E-08  |
| CCDC91   | -0.293879214 | 1.26682E-08 | 5.3304E-08  |
| FAM107A  | -0.293876469 | 1.26724E-08 | 5.33101E-08 |
| GYPE     | -0.293862976 | 1.26927E-08 | 5.33843E-08 |
| MAPRE2   | -0.293664222 | 1.29955E-08 | 5.46464E-08 |

|           |              |             |             |
|-----------|--------------|-------------|-------------|
| ZNF823    | -0.293652451 | 1.30137E-08 | 5.47112E-08 |
| PLK1      | 0.293649306  | 1.30185E-08 | 5.47201E-08 |
| EDNRA     | -0.293635654 | 1.30396E-08 | 5.47972E-08 |
| ATN1      | -0.293624041 | 1.30576E-08 | 5.48611E-08 |
| MYO1D     | -0.293608982 | 1.30809E-08 | 5.49475E-08 |
| OR2A4     | -0.29360508  | 1.3087E-08  | 5.49614E-08 |
| TUBB2A    | 0.293472828  | 1.32937E-08 | 5.5818E-08  |
| C8orf38   | 0.293382986  | 1.3436E-08  | 5.64034E-08 |
| CEP120    | -0.293352196 | 1.34851E-08 | 5.65975E-08 |
| SEC62     | -0.293298224 | 1.35716E-08 | 5.69383E-08 |
| PPP1R2P3  | -0.29329796  | 1.3572E-08  | 5.69383E-08 |
| MAP2K4    | -0.293196524 | 1.3736E-08  | 5.76141E-08 |
| C1orf25   | -0.293183837 | 1.37566E-08 | 5.76885E-08 |
| HEPH      | -0.293175296 | 1.37705E-08 | 5.77347E-08 |
| ZNF596    | -0.292983263 | 1.4087E-08  | 5.90491E-08 |
| NR4A3     | -0.292974299 | 1.41019E-08 | 5.90993E-08 |
| BAT5      | 0.292911791  | 1.42066E-08 | 5.95253E-08 |
| PGAP1     | -0.292887374 | 1.42476E-08 | 5.96848E-08 |
| DLEC1     | -0.29282434  | 1.43542E-08 | 6.01186E-08 |
| ZC3H11A   | -0.292806263 | 1.43849E-08 | 6.02345E-08 |
| CHCHD10   | 0.29280421   | 1.43884E-08 | 6.02365E-08 |
| USP35     | -0.292780969 | 1.4428E-08  | 6.03801E-08 |
| GABARAPL3 | -0.292780498 | 1.44288E-08 | 6.03801E-08 |
| C1QL3     | -0.29270011  | 1.45665E-08 | 6.09436E-08 |
| ZNF280C   | -0.292688132 | 1.45871E-08 | 6.10171E-08 |
| SLC35E2   | -0.292629037 | 1.46893E-08 | 6.14316E-08 |
| AIM1      | -0.292586811 | 1.47627E-08 | 6.17258E-08 |
| TMEM189   | 0.292473608  | 1.49614E-08 | 6.25432E-08 |
| SHANK1    | -0.292424965 | 1.50475E-08 | 6.28902E-08 |
| DNM3      | -0.292404641 | 1.50837E-08 | 6.3028E-08  |
| ATL2      | -0.292377167 | 1.51326E-08 | 6.32194E-08 |
| ITFG1     | -0.292359647 | 1.5164E-08  | 6.33369E-08 |
| AGTPBP1   | -0.292292978 | 1.52837E-08 | 6.38237E-08 |
| COQ10B    | -0.292255499 | 1.53514E-08 | 6.4093E-08  |
| HUWE1     | -0.292216132 | 1.54229E-08 | 6.43778E-08 |
| STXBP5    | -0.292201769 | 1.5449E-08  | 6.44734E-08 |
| NASP      | 0.292199419  | 1.54533E-08 | 6.44777E-08 |
| SHF       | 0.29210122   | 1.56332E-08 | 6.52149E-08 |
| FCF1      | -0.292029903 | 1.57652E-08 | 6.57516E-08 |
| GP6       | -0.292021293 | 1.57812E-08 | 6.58045E-08 |
| C19orf42  | 0.292018253  | 1.57869E-08 | 6.58143E-08 |
| MED11     | 0.291911404  | 1.59868E-08 | 6.66265E-08 |
| GBE1      | -0.291910592 | 1.59884E-08 | 6.66265E-08 |
| AMFR      | -0.291907295 | 1.59946E-08 | 6.66385E-08 |
| LOC400927 | -0.291894398 | 1.60189E-08 | 6.67258E-08 |
| MTRR      | -0.29188665  | 1.60335E-08 | 6.67728E-08 |



|           |              |             |             |
|-----------|--------------|-------------|-------------|
| MSH5      | 0.291875743  | 1.60541E-08 | 6.68446E-08 |
| C1orf97   | 0.291841902  | 1.61182E-08 | 6.70975E-08 |
| LY75      | -0.291820197 | 1.61595E-08 | 6.72552E-08 |
| SLC29A3   | 0.291810381  | 1.61782E-08 | 6.73189E-08 |
| SNTA1     | 0.291796342  | 1.62049E-08 | 6.74162E-08 |
| ZNF267    | -0.2917816   | 1.62331E-08 | 6.75192E-08 |
| GFOD2     | -0.291708155 | 1.6374E-08  | 6.80912E-08 |
| FAR1      | -0.291658013 | 1.64709E-08 | 6.84799E-08 |
| RCSD1     | -0.291644945 | 1.64963E-08 | 6.8571E-08  |
| CELSR2    | -0.291622772 | 1.65394E-08 | 6.87357E-08 |
| BHLHE22   | -0.291543104 | 1.66951E-08 | 6.93685E-08 |
| MAPKSP1   | -0.29151015  | 1.67599E-08 | 6.96233E-08 |
| BRCA2     | -0.291490314 | 1.67991E-08 | 6.97714E-08 |
| SLC25A24  | -0.291465632 | 1.68479E-08 | 6.99596E-08 |
| GEMIN8P4  | 0.291462689  | 1.68537E-08 | 6.99692E-08 |
| SLC38A2   | -0.291442466 | 1.68939E-08 | 7.01212E-08 |
| DUSP18    | -0.291434086 | 1.69105E-08 | 7.01757E-08 |
| PSMD3     | 0.291379731  | 1.70189E-08 | 7.06108E-08 |
| HTR1B     | -0.291344585 | 1.70894E-08 | 7.08883E-08 |
| NCRNA0020 | 0.291302776  | 1.71735E-08 | 7.12227E-08 |
| IFT81     | -0.291290304 | 1.71987E-08 | 7.13123E-08 |
| SPIN3     | -0.291216767 | 1.7348E-08  | 7.19161E-08 |
| SH3GLB1   | -0.291168851 | 1.74459E-08 | 7.23069E-08 |
| DACH1     | -0.29100628  | 1.77821E-08 | 7.36851E-08 |
| ZNF24     | -0.290949103 | 1.79018E-08 | 7.41657E-08 |
| RP1       | -0.290903976 | 1.79969E-08 | 7.4544E-08  |
| FOXH1     | 0.290875264  | 1.80576E-08 | 7.478E-08   |
| GK5       | -0.290821812 | 1.81712E-08 | 7.52347E-08 |
| TOE1      | 0.290792828  | 1.8233E-08  | 7.54752E-08 |
| ROBO4     | -0.290783337 | 1.82534E-08 | 7.55435E-08 |
| SAMD10    | 0.290774378  | 1.82725E-08 | 7.56072E-08 |
| TNC       | -0.290710263 | 1.84104E-08 | 7.61586E-08 |
| SEMA3C    | -0.290708865 | 1.84134E-08 | 7.61586E-08 |
| RNF152    | -0.290648219 | 1.85448E-08 | 7.66861E-08 |
| PARVA     | -0.290643534 | 1.8555E-08  | 7.67123E-08 |
| METTL6    | 0.290591199  | 1.86692E-08 | 7.71682E-08 |
| IFIT2     | -0.290584902 | 1.86829E-08 | 7.72091E-08 |
| KIT       | -0.290571054 | 1.87133E-08 | 7.73185E-08 |
| C6orf62   | 0.290559599  | 1.87384E-08 | 7.74063E-08 |
| C4orf10   | 0.290476994  | 1.89206E-08 | 7.81428E-08 |
| STXBP6    | 0.290452306  | 1.89754E-08 | 7.83529E-08 |
| C4orf31   | -0.290445781 | 1.89899E-08 | 7.83965E-08 |
| KIAA0040  | -0.290425666 | 1.90347E-08 | 7.85651E-08 |
| C15orf24  | 0.290416129  | 1.9056E-08  | 7.86366E-08 |
| FN1       | -0.290340617 | 1.92252E-08 | 7.93186E-08 |
| UGP2      | -0.290327242 | 1.92554E-08 | 7.94131E-08 |

|           |              |             |             |
|-----------|--------------|-------------|-------------|
| DUSP9     | 0.290326906  | 1.92561E-08 | 7.94131E-08 |
| C15orf42  | 0.290273133  | 1.93777E-08 | 7.9898E-08  |
| DSN1      | 0.290262235  | 1.94024E-08 | 7.99834E-08 |
| CCNF      | 0.290237552  | 1.94586E-08 | 8.01982E-08 |
| HERC2P2   | -0.290109289 | 1.97528E-08 | 8.13939E-08 |
| PPARGC1A  | -0.290103528 | 1.97661E-08 | 8.14319E-08 |
| DRD1      | -0.290086129 | 1.98064E-08 | 8.15809E-08 |
| GLRX2     | 0.290018817  | 1.99629E-08 | 8.22086E-08 |
| C1orf52   | 0.290015055  | 1.99717E-08 | 8.22278E-08 |
| HIRA      | -0.289932086 | 2.01663E-08 | 8.30121E-08 |
| FAM160A2  | -0.289914531 | 2.02077E-08 | 8.31654E-08 |
| HSPA13    | -0.289887655 | 2.02713E-08 | 8.34098E-08 |
| PTPN12    | -0.289849653 | 2.03615E-08 | 8.37637E-08 |
| PROSC     | -0.289766968 | 2.05592E-08 | 8.45594E-08 |
| NARG2     | -0.289709228 | 2.06983E-08 | 8.5114E-08  |
| CRY2      | -0.289693263 | 2.07369E-08 | 8.52552E-08 |
| CXCR7     | -0.289578227 | 2.10173E-08 | 8.63902E-08 |
| ZNF107    | -0.289544353 | 2.11006E-08 | 8.6712E-08  |
| CY TSA    | -0.289542828 | 2.11044E-08 | 8.6712E-08  |
| CLCC1     | -0.289484051 | 2.12496E-08 | 8.72909E-08 |
| C11orf42  | -0.289437188 | 2.13661E-08 | 8.77513E-08 |
| SH3BGRL3  | 0.289397963  | 2.14641E-08 | 8.81356E-08 |
| RHOT1     | -0.289386132 | 2.14937E-08 | 8.82391E-08 |
| TMEM66    | -0.289352762 | 2.15776E-08 | 8.8565E-08  |
| LG TN     | 0.289290108  | 2.17358E-08 | 8.9196E-08  |
| JAM2      | -0.289287332 | 2.17428E-08 | 8.92065E-08 |
| NKIRAS2   | 0.289246761  | 2.18459E-08 | 8.9611E-08  |
| ME2       | -0.289225779 | 2.18994E-08 | 8.9812E-08  |
| LOC222699 | 0.28920249   | 2.19589E-08 | 9.00376E-08 |
| CAMK2D    | -0.289032857 | 2.23973E-08 | 9.1816E-08  |
| YAF2      | -0.288976984 | 2.25435E-08 | 9.23964E-08 |
| PDGFB     | -0.288912944 | 2.27122E-08 | 9.30688E-08 |
| MAP9      | -0.288894099 | 2.27621E-08 | 9.3254E-08  |
| ATP8A1    | -0.288855784 | 2.28639E-08 | 9.36516E-08 |
| TEX19     | 0.288844965  | 2.28927E-08 | 9.37503E-08 |
| BAZ2A     | -0.288781575 | 2.30622E-08 | 9.44251E-08 |
| KIAA1107  | -0.288717187 | 2.32356E-08 | 9.51156E-08 |
| TTC4      | 0.288708657  | 2.32587E-08 | 9.51905E-08 |
| RG9MTD2   | -0.288592479 | 2.35751E-08 | 9.64656E-08 |
| TRIP4     | 0.288570191  | 2.36363E-08 | 9.66961E-08 |
| MAP3K12   | -0.288516565 | 2.37841E-08 | 9.72775E-08 |
| GATA6     | -0.288515093 | 2.37882E-08 | 9.72775E-08 |
| ZNF193    | 0.288426866  | 2.40334E-08 | 9.826E-08   |
| TRPV3     | -0.288413181 | 2.40716E-08 | 9.83962E-08 |
| TP53RK    | 0.288304016  | 2.43788E-08 | 9.96315E-08 |
| RGL2      | 0.288280633  | 2.44451E-08 | 9.9882E-08  |

|           |              |             |             |
|-----------|--------------|-------------|-------------|
| TFAP4     | 0.288254265  | 2.45201E-08 | 1.00168E-07 |
| SLC16A2   | -0.288162089 | 2.47839E-08 | 1.01225E-07 |
| TAS2R20   | 0.288102086  | 2.49572E-08 | 1.01911E-07 |
| BRCC3     | -0.288035958 | 2.51494E-08 | 1.02675E-07 |
| LRRC34    | -0.287998012 | 2.52604E-08 | 1.03107E-07 |
| ZNF514    | -0.287990126 | 2.52835E-08 | 1.03164E-07 |
| THAP1     | -0.287989723 | 2.52847E-08 | 1.03164E-07 |
| DOCK8     | -0.28796102  | 2.5369E-08  | 1.03487E-07 |
| DHX40     | -0.287936305 | 2.54418E-08 | 1.03763E-07 |
| EMR4P     | -0.287903982 | 2.55374E-08 | 1.04131E-07 |
| SFRS12IP1 | 0.287890443  | 2.55775E-08 | 1.04273E-07 |
| C9orf47   | -0.28781578  | 2.57999E-08 | 1.05159E-07 |
| TOB1      | -0.287781385 | 2.5903E-08  | 1.05557E-07 |
| KDM5C     | -0.287756552 | 2.59776E-08 | 1.0584E-07  |
| ARID3C    | -0.287740648 | 2.60256E-08 | 1.06005E-07 |
| N4BP1     | -0.287739544 | 2.60289E-08 | 1.06005E-07 |
| HRH4      | -0.287640585 | 2.63291E-08 | 1.07206E-07 |
| RAB6C     | -0.287627938 | 2.63677E-08 | 1.07341E-07 |
| C5orf34   | 0.287624125  | 2.63793E-08 | 1.07366E-07 |
| RBM26     | -0.28750605  | 2.67425E-08 | 1.08823E-07 |
| CSRNP2    | -0.287460146 | 2.6885E-08  | 1.0938E-07  |
| KCNS3     | -0.287428136 | 2.69848E-08 | 1.09764E-07 |
| C3orf36   | -0.287421726 | 2.70049E-08 | 1.09823E-07 |
| PLCG2     | -0.287343693 | 2.72499E-08 | 1.10796E-07 |
| PTPN3     | -0.287261676 | 2.75097E-08 | 1.1183E-07  |
| HAUS1     | 0.287216174  | 2.76548E-08 | 1.12397E-07 |
| CITED2    | -0.287182001 | 2.77644E-08 | 1.12819E-07 |
| RRM2      | 0.287096862  | 2.8039E-08  | 1.13912E-07 |
| APEX1     | 0.287089878  | 2.80617E-08 | 1.13974E-07 |
| PSIMCT-1  | -0.28708864  | 2.80657E-08 | 1.13974E-07 |
| PSD4      | -0.28708218  | 2.80867E-08 | 1.14036E-07 |
| AZI2      | -0.287041264 | 2.82198E-08 | 1.14553E-07 |
| NFIB      | -0.28702528  | 2.8272E-08  | 1.14741E-07 |
| TNXB      | -0.286995092 | 2.83708E-08 | 1.15119E-07 |
| C3orf1    | 0.286822528  | 2.8942E-08  | 1.17413E-07 |
| C17orf42  | 0.286816246  | 2.8963E-08  | 1.17474E-07 |
| FAM65A    | -0.286776789 | 2.90953E-08 | 1.17987E-07 |
| C1orf105  | 0.28666771   | 2.9464E-08  | 1.19457E-07 |
| LOC100128 | 0.286496298  | 3.00524E-08 | 1.21819E-07 |
| RNF150    | -0.28649104  | 3.00707E-08 | 1.21868E-07 |
| CRTAC1    | -0.286486995 | 3.00847E-08 | 1.219E-07   |
| FAM183A   | 0.286418071  | 3.03248E-08 | 1.22847E-07 |
| FN3KRP    | 0.286401466  | 3.03829E-08 | 1.23058E-07 |
| ZNF121    | -0.286388856 | 3.04271E-08 | 1.23212E-07 |
| VWA3B     | -0.286381571 | 3.04526E-08 | 1.2329E-07  |
| LENG9     | 0.286347033  | 3.05741E-08 | 1.23757E-07 |

|           |              |             |             |
|-----------|--------------|-------------|-------------|
| ATF6      | -0.286336451 | 3.06114E-08 | 1.23883E-07 |
| PAXIP1    | -0.286303208 | 3.0729E-08  | 1.24333E-07 |
| ZNF233    | 0.286298804  | 3.07446E-08 | 1.24371E-07 |
| KIF4A     | 0.286283017  | 3.08005E-08 | 1.24572E-07 |
| DIS3      | -0.286200566 | 3.10945E-08 | 1.25736E-07 |
| SMG5      | 0.286188505  | 3.11378E-08 | 1.25872E-07 |
| CRTC2     | 0.286187621  | 3.11409E-08 | 1.25872E-07 |
| FLJ12825  | 0.286185714  | 3.11478E-08 | 1.25874E-07 |
| SYT11     | -0.286138998 | 3.13158E-08 | 1.26528E-07 |
| KIAA0391  | -0.286067676 | 3.15741E-08 | 1.27545E-07 |
| DNM2      | -0.28603317  | 3.16998E-08 | 1.28027E-07 |
| SPERT     | 0.286021104  | 3.17439E-08 | 1.28179E-07 |
| TBC1D19   | -0.28599356  | 3.18447E-08 | 1.2856E-07  |
| KCNAB2    | -0.285971302 | 3.19263E-08 | 1.28864E-07 |
| RPGR      | -0.285929883 | 3.20789E-08 | 1.29453E-07 |
| LOC728855 | 0.285926828  | 3.20902E-08 | 1.29472E-07 |
| HSPD1     | 0.285857811  | 3.2346E-08  | 1.30478E-07 |
| MKS1      | 0.285805241  | 3.25422E-08 | 1.31243E-07 |
| DPH1      | -0.28575246  | 3.27404E-08 | 1.32015E-07 |
| RBL1      | -0.285731964 | 3.28176E-08 | 1.323E-07   |
| CSRNP1    | -0.285693292 | 3.29639E-08 | 1.32863E-07 |
| TTN       | -0.285679936 | 3.30145E-08 | 1.3304E-07  |
| PLS1      | -0.285678    | 3.30219E-08 | 1.33043E-07 |
| C3orf47   | 0.28567054   | 3.30502E-08 | 1.3313E-07  |
| SPON1     | -0.28556743  | 3.34442E-08 | 1.3469E-07  |
| ZSWIM3    | 0.285524694  | 3.36089E-08 | 1.35326E-07 |
| ZNF33A    | -0.285482533 | 3.37721E-08 | 1.35955E-07 |
| CT45A1    | 0.28547869   | 3.3787E-08  | 1.35988E-07 |
| SMC3      | -0.285445219 | 3.39171E-08 | 1.36484E-07 |
| ZBTB16    | -0.285441247 | 3.39326E-08 | 1.36519E-07 |
| EFNB3     | -0.28541707  | 3.4027E-08  | 1.36871E-07 |
| NAA35     | -0.285382246 | 3.41633E-08 | 1.37391E-07 |
| KDM4B     | -0.285371572 | 3.42052E-08 | 1.37532E-07 |
| RNPEPL1   | 0.285357355  | 3.42611E-08 | 1.37729E-07 |
| RECK      | -0.285343671 | 3.4315E-08  | 1.37918E-07 |
| CABP7     | 0.285338843  | 3.4334E-08  | 1.37966E-07 |
| POLR2J4   | 0.285332827  | 3.43577E-08 | 1.38034E-07 |
| RANGAP1   | 0.285312848  | 3.44366E-08 | 1.38323E-07 |
| TRMT12    | 0.285281432  | 3.4561E-08  | 1.38795E-07 |
| SOCS2     | -0.285274112 | 3.45901E-08 | 1.38883E-07 |
| COBRA1    | 0.285250826  | 3.46827E-08 | 1.39227E-07 |
| MUSTN1    | 0.285216646  | 3.4819E-08  | 1.39746E-07 |
| GPR141    | -0.285163226 | 3.50331E-08 | 1.40577E-07 |
| FAM193A   | -0.285161279 | 3.50409E-08 | 1.4058E-07  |
| SH2D1B    | -0.285159521 | 3.5048E-08  | 1.4058E-07  |
| AMZ2      | 0.285131261  | 3.51618E-08 | 1.41008E-07 |

|            |              |             |             |
|------------|--------------|-------------|-------------|
| C14orf109  | 0.285106641  | 3.52612E-08 | 1.41378E-07 |
| ATXN7L1    | -0.285090486 | 3.53266E-08 | 1.41612E-07 |
| SPIN4      | -0.285011922 | 3.56463E-08 | 1.42865E-07 |
| RNF13      | -0.284999847 | 3.56957E-08 | 1.43034E-07 |
| RAB22A     | -0.284989711 | 3.57372E-08 | 1.43161E-07 |
| ST6GALNAC  | -0.284988611 | 3.57417E-08 | 1.43161E-07 |
| KLHDC5     | -0.284984151 | 3.576E-08   | 1.43206E-07 |
| PWWP2A     | -0.284964491 | 3.58407E-08 | 1.435E-07   |
| PLN        | -0.284941115 | 3.59369E-08 | 1.43856E-07 |
| ZNF821     | 0.284925258  | 3.60023E-08 | 1.44089E-07 |
| IVD        | -0.284809888 | 3.64814E-08 | 1.45977E-07 |
| ABCE1      | -0.284806385 | 3.64961E-08 | 1.46006E-07 |
| TPPP       | -0.284739375 | 3.67773E-08 | 1.47102E-07 |
| GTF2IRD2P1 | -0.284729752 | 3.68179E-08 | 1.47235E-07 |
| RTN4IP1    | 0.284701774  | 3.69361E-08 | 1.47677E-07 |
| TRAF3IP1   | -0.284666351 | 3.70862E-08 | 1.48248E-07 |
| GLI2       | -0.284661985 | 3.71047E-08 | 1.48292E-07 |
| FIBIN      | -0.284657427 | 3.71241E-08 | 1.4834E-07  |
| SULT1B1    | -0.284609566 | 3.73281E-08 | 1.49108E-07 |
| RNF219     | -0.284608842 | 3.73312E-08 | 1.49108E-07 |
| ZNF169     | -0.284604915 | 3.7348E-08  | 1.49145E-07 |
| SERPINB9   | -0.284600105 | 3.73686E-08 | 1.49197E-07 |
| PIK3C2B    | -0.284575809 | 3.74726E-08 | 1.49583E-07 |
| CXCL12     | -0.284565424 | 3.75172E-08 | 1.49731E-07 |
| CCDC55     | -0.28453202  | 3.76609E-08 | 1.50274E-07 |
| UROS       | 0.284512832  | 3.77437E-08 | 1.50574E-07 |
| ZNF774     | -0.284497405 | 3.78104E-08 | 1.5081E-07  |
| WBSCR16    | 0.284467775  | 3.79388E-08 | 1.51278E-07 |
| CYB5R1     | 0.284466812  | 3.7943E-08  | 1.51278E-07 |
| NR1H3      | 0.284412168  | 3.8181E-08  | 1.52197E-07 |
| GDF2       | -0.284409312 | 3.81934E-08 | 1.52216E-07 |
| GRINA      | 0.284389604  | 3.82796E-08 | 1.52529E-07 |
| ANAPC5     | 0.284386734  | 3.82922E-08 | 1.52544E-07 |
| IRF2BP1    | 0.284385216  | 3.82989E-08 | 1.52544E-07 |
| PCDHB13    | -0.284317555 | 3.85964E-08 | 1.53671E-07 |
| HDAC5      | 0.284317349  | 3.85973E-08 | 1.53671E-07 |
| RPL13AP6   | 0.284311627  | 3.86225E-08 | 1.53741E-07 |
| ZFPM1      | -0.284306031 | 3.86473E-08 | 1.53809E-07 |
| SLITRK6    | -0.284203966 | 3.91009E-08 | 1.55583E-07 |
| ANO3       | -0.284184948 | 3.9186E-08  | 1.55891E-07 |
| NLRP14     | -0.284118043 | 3.94867E-08 | 1.57049E-07 |
| CELF2      | -0.284116653 | 3.9493E-08  | 1.57049E-07 |
| C8orf79    | -0.284102258 | 3.9558E-08  | 1.57261E-07 |
| TXNDC9     | 0.284101363  | 3.9562E-08  | 1.57261E-07 |
| RPS26P11   | 0.284011362  | 3.99709E-08 | 1.58855E-07 |
| TNNC1      | 0.283988808  | 4.0074E-08  | 1.59233E-07 |

|           |              |             |             |
|-----------|--------------|-------------|-------------|
| LDOC1L    | -0.283889989 | 4.05287E-08 | 1.61007E-07 |
| TNPO1     | -0.283887712 | 4.05393E-08 | 1.61017E-07 |
| DACT1     | -0.28388185  | 4.05664E-08 | 1.61093E-07 |
| EXOC3     | 0.283871583  | 4.0614E-08  | 1.61249E-07 |
| CXorf61   | 0.283795057  | 4.09703E-08 | 1.62632E-07 |
| CITED4    | 0.283780613  | 4.10379E-08 | 1.62867E-07 |
| GORAB     | -0.283720431 | 4.13206E-08 | 1.63957E-07 |
| NAAA      | -0.283705121 | 4.13929E-08 | 1.64211E-07 |
| LYPLA2P1  | 0.283700684  | 4.14138E-08 | 1.64261E-07 |
| PDGFD     | -0.28364695  | 4.16684E-08 | 1.65238E-07 |
| LOC440944 | 0.283540832  | 4.21757E-08 | 1.67217E-07 |
| SEBOX     | -0.283481838 | 4.24603E-08 | 1.68311E-07 |
| PCDHGA1   | -0.283439984 | 4.26633E-08 | 1.69082E-07 |
| TOM1L1    | -0.283405984 | 4.28289E-08 | 1.69705E-07 |
| KCNJ2     | -0.283391341 | 4.29004E-08 | 1.69955E-07 |
| AURKA     | 0.283369684  | 4.30064E-08 | 1.70341E-07 |
| ADAMTS7   | -0.283362525 | 4.30415E-08 | 1.70446E-07 |
| KIAA1704  | -0.283324624 | 4.32277E-08 | 1.71149E-07 |
| LOC613037 | -0.283267851 | 4.35082E-08 | 1.72225E-07 |
| TBC1D3C   | 0.283199656  | 4.38473E-08 | 1.73533E-07 |
| SP2       | -0.283165994 | 4.40157E-08 | 1.74165E-07 |
| ZDBF2     | -0.283144124 | 4.41254E-08 | 1.74564E-07 |
| DCAF10    | -0.283109862 | 4.42978E-08 | 1.75211E-07 |
| FMR1      | -0.283108162 | 4.43064E-08 | 1.75211E-07 |
| PSMB10    | 0.283066381  | 4.45176E-08 | 1.76011E-07 |
| NUFIP2    | -0.282933144 | 4.51975E-08 | 1.78664E-07 |
| TIMM22    | 0.282892926  | 4.54047E-08 | 1.79447E-07 |
| PRR16     | -0.282827211 | 4.57452E-08 | 1.80757E-07 |
| ANXA11    | 0.282823908  | 4.57624E-08 | 1.80789E-07 |
| UBE2CBP   | 0.282815859  | 4.58043E-08 | 1.80919E-07 |
| CHST3     | -0.28279477  | 4.59142E-08 | 1.81317E-07 |
| C1orf54   | 0.282787744  | 4.59509E-08 | 1.81426E-07 |
| MAP7      | -0.282664785 | 4.65975E-08 | 1.83942E-07 |
| SH2D3C    | -0.28265647  | 4.66415E-08 | 1.8408E-07  |
| PIGC      | 0.282644055  | 4.67073E-08 | 1.84303E-07 |
| RNMT      | -0.282549495 | 4.72117E-08 | 1.86256E-07 |
| C4orf34   | -0.282532664 | 4.7302E-08  | 1.86575E-07 |
| NPY1R     | -0.28252145  | 4.73623E-08 | 1.86776E-07 |
| TOMM34    | 0.282465969  | 4.76616E-08 | 1.87919E-07 |
| TRIM66    | -0.282431838 | 4.78466E-08 | 1.88611E-07 |
| ASB8      | -0.28235558  | 4.82625E-08 | 1.90213E-07 |
| EPHA2     | -0.282268341 | 4.87425E-08 | 1.92067E-07 |
| GDF6      | -0.282234318 | 4.8931E-08  | 1.92741E-07 |
| POLD2     | 0.282233959  | 4.8933E-08  | 1.92741E-07 |
| GJA5      | -0.282186557 | 4.91968E-08 | 1.93742E-07 |
| MGLL      | -0.282135501 | 4.94824E-08 | 1.94828E-07 |

|           |              |             |             |
|-----------|--------------|-------------|-------------|
| THSD7B    | -0.282095995 | 4.97045E-08 | 1.95664E-07 |
| LOC643677 | -0.282065079 | 4.9879E-08  | 1.96312E-07 |
| KCNN3     | -0.282055357 | 4.9934E-08  | 1.9649E-07  |
| ANO7      | 0.281941116  | 5.05846E-08 | 1.99011E-07 |
| HAND2     | -0.281892258 | 5.08653E-08 | 2.00076E-07 |
| ZC3HAV1L  | -0.281883655 | 5.09149E-08 | 2.00231E-07 |
| TLR1      | -0.281860485 | 5.10487E-08 | 2.00718E-07 |
| SMPD3     | -0.281830191 | 5.12241E-08 | 2.01368E-07 |
| OSGEP     | 0.281776741  | 5.15351E-08 | 2.0255E-07  |
| VEGFC     | -0.281772753 | 5.15584E-08 | 2.02602E-07 |
| TOM1      | 0.281749954  | 5.16916E-08 | 2.03085E-07 |
| BICC1     | -0.281729967 | 5.18087E-08 | 2.03505E-07 |
| PDCD2     | 0.281673491  | 5.21409E-08 | 2.0477E-07  |
| FUT10     | -0.281643256 | 5.23196E-08 | 2.05431E-07 |
| LYVE1     | -0.281594799 | 5.26073E-08 | 2.0652E-07  |
| TMTC1     | -0.281572022 | 5.2743E-08  | 2.07012E-07 |
| ARL6IP1   | -0.281569166 | 5.276E-08   | 2.07038E-07 |
| TMEM188   | -0.281530683 | 5.29902E-08 | 2.07893E-07 |
| GJB5      | -0.281529239 | 5.29989E-08 | 2.07893E-07 |
| ZXDB      | -0.281470574 | 5.33517E-08 | 2.09236E-07 |
| PDXDC2    | -0.281368402 | 5.39715E-08 | 2.11625E-07 |
| CHST9     | -0.281337209 | 5.41621E-08 | 2.1233E-07  |
| KTN1      | -0.281301719 | 5.43798E-08 | 2.13142E-07 |
| SC65      | 0.281235552  | 5.47879E-08 | 2.14699E-07 |
| CALM3     | 0.281208038  | 5.49584E-08 | 2.15325E-07 |
| LENG8     | -0.281203968 | 5.49837E-08 | 2.15382E-07 |
| IFT80     | -0.281192566 | 5.50546E-08 | 2.15617E-07 |
| CHMP1A    | 0.281082632  | 5.57423E-08 | 2.18267E-07 |
| MOBK1A    | -0.281014386 | 5.61734E-08 | 2.19912E-07 |
| ANAPC1    | -0.281004789 | 5.62343E-08 | 2.20107E-07 |
| ZNF17     | -0.280941995 | 5.66343E-08 | 2.21629E-07 |
| 43895     | -0.280926466 | 5.67336E-08 | 2.21974E-07 |
| LASS6     | -0.280919673 | 5.67771E-08 | 2.22101E-07 |
| MALT1     | -0.280858744 | 5.71687E-08 | 2.23589E-07 |
| PSMB9     | 0.280806342  | 5.75076E-08 | 2.24869E-07 |
| BEST4     | 0.280804648  | 5.75186E-08 | 2.24869E-07 |
| NTRK2     | -0.280795926 | 5.75752E-08 | 2.25046E-07 |
| WDR45     | 0.280792062  | 5.76003E-08 | 2.251E-07   |
| ANKRD54   | 0.280738756  | 5.79476E-08 | 2.26413E-07 |
| NUAK1     | -0.280514544 | 5.94305E-08 | 2.32161E-07 |
| SOX5      | -0.280503711 | 5.95031E-08 | 2.32399E-07 |
| KIFC2     | 0.280495061  | 5.95611E-08 | 2.3258E-07  |
| RAB3GAP2  | -0.280377837 | 6.03526E-08 | 2.35625E-07 |
| FAM180A   | -0.28037517  | 6.03707E-08 | 2.35649E-07 |
| C20orf194 | -0.280275322 | 6.10531E-08 | 2.38266E-07 |
| NDUFA9    | 0.28023636   | 6.13214E-08 | 2.39266E-07 |

|          |              |             |             |
|----------|--------------|-------------|-------------|
| C1orf56  | 0.28019307   | 6.16208E-08 | 2.40388E-07 |
| RANBP3L  | -0.280163902 | 6.18234E-08 | 2.41131E-07 |
| GDAP2    | -0.280150587 | 6.19161E-08 | 2.41445E-07 |
| NRBP1    | 0.280108454  | 6.22102E-08 | 2.42544E-07 |
| POLR2E   | 0.280076176  | 6.24364E-08 | 2.43379E-07 |
| ABHD5    | -0.280053985 | 6.25924E-08 | 2.43939E-07 |
| C2orf82  | 0.280021521  | 6.28213E-08 | 2.44783E-07 |
| FTSJ2    | 0.279878305  | 6.38408E-08 | 2.48707E-07 |
| C1orf77  | 0.279831395  | 6.41782E-08 | 2.49972E-07 |
| CEP76    | -0.279819297 | 6.42654E-08 | 2.50242E-07 |
| BAT2L2   | -0.279818298 | 6.42727E-08 | 2.50242E-07 |
| MEGF10   | -0.279760459 | 6.46916E-08 | 2.51824E-07 |
| TYK2     | -0.279707392 | 6.50783E-08 | 2.5328E-07  |
| BBS5     | -0.279639211 | 6.55784E-08 | 2.55177E-07 |
| MOGAT2   | -0.279602388 | 6.585E-08   | 2.56183E-07 |
| TSGA10   | -0.279570024 | 6.60897E-08 | 2.57066E-07 |
| BZW2     | 0.279468948  | 6.68435E-08 | 2.59947E-07 |
| ZNF778   | -0.279425192 | 6.71724E-08 | 2.61175E-07 |
| ZNF132   | -0.279417794 | 6.72282E-08 | 2.61341E-07 |
| NCOR2    | -0.279397423 | 6.73819E-08 | 2.61887E-07 |
| CRHR2    | -0.279388298 | 6.74509E-08 | 2.62104E-07 |
| NSUN5P1  | 0.279382192  | 6.74971E-08 | 2.62233E-07 |
| ATP5J    | 0.279341657  | 6.78047E-08 | 2.63376E-07 |
| EPM2A    | -0.279310147 | 6.80446E-08 | 2.64257E-07 |
| TUBB3    | 0.27929988   | 6.8123E-08  | 2.64484E-07 |
| TMEM173  | -0.279299009 | 6.81297E-08 | 2.64484E-07 |
| ITGAV    | -0.279162046 | 6.91836E-08 | 2.68498E-07 |
| PAR5     | -0.279161134 | 6.91906E-08 | 2.68498E-07 |
| WDR19    | -0.27915617  | 6.92291E-08 | 2.68595E-07 |
| C2orf24  | 0.279093594  | 6.97162E-08 | 2.70432E-07 |
| ATP9B    | -0.279069081 | 6.99079E-08 | 2.71123E-07 |
| RPA2     | 0.279058506  | 6.99907E-08 | 2.71391E-07 |
| GCFC1    | -0.278997333 | 7.04719E-08 | 2.73204E-07 |
| GPCPD1   | -0.278968393 | 7.07006E-08 | 2.74037E-07 |
| NOV      | -0.278925731 | 7.10391E-08 | 2.75296E-07 |
| S100P    | 0.278868156  | 7.14984E-08 | 2.77008E-07 |
| HSD17B4  | -0.278866844 | 7.15089E-08 | 2.77008E-07 |
| GNPAT    | 0.278721765  | 7.26791E-08 | 2.81487E-07 |
| VSNL1    | 0.278693154  | 7.29121E-08 | 2.82334E-07 |
| KIAA1279 | -0.278683811 | 7.29883E-08 | 2.82574E-07 |
| CASKIN2  | -0.278671329 | 7.30903E-08 | 2.82914E-07 |
| TMX1     | -0.278655531 | 7.32195E-08 | 2.83359E-07 |
| NAP1L4   | 0.278638323  | 7.33605E-08 | 2.8385E-07  |
| CILP     | -0.278622765 | 7.34883E-08 | 2.84289E-07 |
| POLR3H   | 0.278614148  | 7.35591E-08 | 2.84508E-07 |
| SPATA2L  | 0.278601567  | 7.36627E-08 | 2.84853E-07 |



|           |              |             |             |
|-----------|--------------|-------------|-------------|
| GPRC5B    | -0.278594821 | 7.37182E-08 | 2.85012E-07 |
| C20orf196 | 0.278455439  | 7.48756E-08 | 2.89431E-07 |
| HECA      | -0.278450605 | 7.49161E-08 | 2.89496E-07 |
| LOC606724 | 0.278449956  | 7.49215E-08 | 2.89496E-07 |
| DNAH10    | -0.27844674  | 7.49484E-08 | 2.89544E-07 |
| ANGPT1    | -0.278429936 | 7.50893E-08 | 2.90032E-07 |
| ARHGEF15  | -0.278417161 | 7.51965E-08 | 2.9039E-07  |
| CYTH2     | 0.278390691  | 7.54192E-08 | 2.91193E-07 |
| SLC25A6   | 0.278381415  | 7.54974E-08 | 2.91438E-07 |
| SULT1A3   | 0.278360691  | 7.56724E-08 | 2.92057E-07 |
| SPG20     | -0.278216908 | 7.68971E-08 | 2.96727E-07 |
| CD302     | -0.278214882 | 7.69145E-08 | 2.96736E-07 |
| PRICKLE3  | -0.27818105  | 7.72055E-08 | 2.97801E-07 |
| CMPK1     | -0.27817794  | 7.72323E-08 | 2.97847E-07 |
| ZNF214    | -0.278096191 | 7.79401E-08 | 3.00518E-07 |
| LIPG      | -0.278093513 | 7.79634E-08 | 3.0055E-07  |
| SOX12     | 0.278084345  | 7.80432E-08 | 3.00799E-07 |
| SYNGAP1   | -0.278074075 | 7.81327E-08 | 3.01086E-07 |
| SH3BGRL   | -0.278062408 | 7.82345E-08 | 3.014E-07   |
| SSC5D     | -0.278061266 | 7.82444E-08 | 3.014E-07   |
| MAGED4    | 0.277939299  | 7.93161E-08 | 3.05469E-07 |
| C14orf132 | -0.277910081 | 7.95749E-08 | 3.06407E-07 |
| SCARA5    | -0.277903358 | 7.96346E-08 | 3.06577E-07 |
| GSR       | -0.277882894 | 7.98165E-08 | 3.07218E-07 |
| OAS3      | -0.277779588 | 8.07409E-08 | 3.10716E-07 |
| IL17RA    | -0.277702549 | 8.14369E-08 | 3.13334E-07 |
| N6AMT2    | 0.2777002    | 8.14582E-08 | 3.13355E-07 |
| NTF3      | -0.277690492 | 8.15463E-08 | 3.13634E-07 |
| ZNF836    | -0.277651088 | 8.19051E-08 | 3.14953E-07 |
| PDE4B     | -0.277634688 | 8.20548E-08 | 3.15467E-07 |
| CKAP4     | 0.277535193  | 8.29689E-08 | 3.1892E-07  |
| DOK5      | -0.277484774 | 8.34359E-08 | 3.20653E-07 |
| EIF4G1    | -0.277456498 | 8.36989E-08 | 3.21602E-07 |
| G6PC3     | 0.277437401  | 8.3877E-08  | 3.22224E-07 |
| SUV420H2  | 0.277410203  | 8.41312E-08 | 3.23138E-07 |
| NGRN      | 0.277399178  | 8.42345E-08 | 3.23473E-07 |
| AMBRA1    | -0.277393716 | 8.42857E-08 | 3.23607E-07 |
| POFUT1    | -0.277321335 | 8.49671E-08 | 3.2616E-07  |
| ARMCX2    | -0.277245232 | 8.56893E-08 | 3.28869E-07 |
| PCYT1A    | -0.277149556 | 8.66057E-08 | 3.32259E-07 |
| NOP2      | 0.277149545  | 8.66058E-08 | 3.32259E-07 |
| RBM18     | -0.277121524 | 8.6876E-08  | 3.33231E-07 |
| PPP3CA    | -0.277111319 | 8.69746E-08 | 3.33545E-07 |
| FAM59A    | -0.277047606 | 8.75925E-08 | 3.3585E-07  |
| IRAK4     | -0.27702287  | 8.78336E-08 | 3.3671E-07  |
| ESF1      | -0.276990061 | 8.81543E-08 | 3.37874E-07 |

|           |              |             |             |
|-----------|--------------|-------------|-------------|
| IGF2BP1   | 0.276949978  | 8.85477E-08 | 3.39316E-07 |
| BSND      | 0.276934014  | 8.87049E-08 | 3.39853E-07 |
| GTF3C3    | -0.276870041 | 8.93373E-08 | 3.4221E-07  |
| IL1RAP    | -0.276857661 | 8.94602E-08 | 3.42615E-07 |
| C9orf69   | 0.276798217  | 9.00525E-08 | 3.44817E-07 |
| CAPN10    | 0.276787582  | 9.01588E-08 | 3.45158E-07 |
| WIPI2     | 0.27677037   | 9.03312E-08 | 3.45752E-07 |
| PPP2R5B   | -0.276747995 | 9.05558E-08 | 3.46545E-07 |
| CALR      | 0.276741084  | 9.06253E-08 | 3.46744E-07 |
| ALG10B    | -0.276735829 | 9.06782E-08 | 3.4688E-07  |
| PLA2G1B   | 0.276708092  | 9.09577E-08 | 3.47882E-07 |
| IQCC      | 0.276679227  | 9.12495E-08 | 3.48931E-07 |
| ASB6      | 0.27661665   | 9.18852E-08 | 3.51295E-07 |
| ZNF862    | -0.276457611 | 9.352E-08   | 3.57476E-07 |
| MAGT1     | -0.276427432 | 9.38333E-08 | 3.58605E-07 |
| COL5A1    | -0.27642218  | 9.3888E-08  | 3.58745E-07 |
| YIPF6     | -0.276413902 | 9.39742E-08 | 3.59005E-07 |
| CNOT8     | -0.276406196 | 9.40544E-08 | 3.59243E-07 |
| UBR2      | -0.27640094  | 9.41092E-08 | 3.59384E-07 |
| TSR2      | 0.276389333  | 9.42304E-08 | 3.59777E-07 |
| TM4SF5    | 0.276375766  | 9.43722E-08 | 3.60249E-07 |
| TPX2      | 0.276365236  | 9.44823E-08 | 3.60601E-07 |
| CEBPA     | 0.276352468  | 9.46161E-08 | 3.61042E-07 |
| HSPA4L    | -0.276319648 | 9.49608E-08 | 3.62288E-07 |
| ARPP19    | -0.276292213 | 9.52499E-08 | 3.63321E-07 |
| TOMM20    | 0.276178403  | 9.64581E-08 | 3.6786E-07  |
| TRAP1     | 0.27611955   | 9.70886E-08 | 3.70193E-07 |
| LOC100133 | 0.276090655  | 9.73997E-08 | 3.71308E-07 |
| GLA       | 0.276083029  | 9.74819E-08 | 3.71551E-07 |
| WHAMML1   | -0.27607328  | 9.75872E-08 | 3.71881E-07 |
| BRE       | 0.275957704  | 9.88432E-08 | 3.76581E-07 |
| ZNF469    | -0.275956319 | 9.88584E-08 | 3.76581E-07 |
| TIAM1     | -0.275945598 | 9.89757E-08 | 3.76956E-07 |
| PER2      | -0.275889218 | 9.95949E-08 | 3.79241E-07 |
| MAP6      | -0.275874877 | 9.9753E-08  | 3.79771E-07 |
| LRRC45    | 0.275827669  | 1.00275E-07 | 3.81686E-07 |
| C11orf63  | -0.2757753   | 1.00857E-07 | 3.83829E-07 |
| RPPH1     | 0.275749927  | 1.01141E-07 | 3.84833E-07 |
| PGAM5     | -0.275747303 | 1.0117E-07  | 3.84871E-07 |
| NAPG      | -0.27566496  | 1.02095E-07 | 3.88316E-07 |
| HINT3     | -0.275650123 | 1.02262E-07 | 3.88878E-07 |
| PCDHB17   | -0.275590951 | 1.02933E-07 | 3.91354E-07 |
| NID1      | -0.275582555 | 1.03029E-07 | 3.91643E-07 |
| RTF1      | -0.27552518  | 1.03684E-07 | 3.94037E-07 |
| XPO4      | -0.275523906 | 1.03698E-07 | 3.94037E-07 |
| DPY19L4   | -0.275483027 | 1.04167E-07 | 3.95745E-07 |

|           |              |             |             |
|-----------|--------------|-------------|-------------|
| RNF141    | -0.275463047 | 1.04397E-07 | 3.96543E-07 |
| FBLL1     | 0.275420324  | 1.04891E-07 | 3.98342E-07 |
| KIAA1274  | -0.275179045 | 1.07721E-07 | 4.09011E-07 |
| ORC6L     | 0.275169805  | 1.07831E-07 | 4.0935E-07  |
| MIA       | 0.27515625   | 1.07992E-07 | 4.09867E-07 |
| LDLRAD2   | 0.27515492   | 1.08008E-07 | 4.09867E-07 |
| TOR2A     | 0.275143217  | 1.08148E-07 | 4.10318E-07 |
| PDLIM1    | 0.275136031  | 1.08233E-07 | 4.10565E-07 |
| PAWR      | -0.275131584 | 1.08286E-07 | 4.10688E-07 |
| DCI       | 0.275103422  | 1.08623E-07 | 4.11887E-07 |
| BLZF1     | -0.275022446 | 1.09597E-07 | 4.15501E-07 |
| SIN3A     | -0.275000379 | 1.09864E-07 | 4.16433E-07 |
| RPL7L1    | 0.274974118  | 1.10182E-07 | 4.17561E-07 |
| BDNF      | -0.274924537 | 1.10786E-07 | 4.19768E-07 |
| LSM12     | 0.27491883   | 1.10856E-07 | 4.19952E-07 |
| TSG101    | 0.274915004  | 1.10902E-07 | 4.2005E-07  |
| SLC35A1   | -0.274909759 | 1.10966E-07 | 4.20212E-07 |
| LPXN      | -0.274795153 | 1.12376E-07 | 4.25469E-07 |
| CAMK1D    | -0.274763008 | 1.12775E-07 | 4.26897E-07 |
| SNORD116- | -0.274747175 | 1.12971E-07 | 4.2756E-07  |
| LUM       | -0.274742183 | 1.13033E-07 | 4.27714E-07 |
| FAM101B   | -0.274710017 | 1.13434E-07 | 4.2915E-07  |
| C17orf57  | -0.274641392 | 1.14294E-07 | 4.32322E-07 |
| TCHH      | -0.274532408 | 1.15673E-07 | 4.37454E-07 |
| ZBTB7C    | -0.274495983 | 1.16138E-07 | 4.39126E-07 |
| SLC16A4   | -0.274454987 | 1.16662E-07 | 4.41027E-07 |
| TTC3      | -0.274440122 | 1.16853E-07 | 4.4164E-07  |
| HIST1H3I  | 0.2744389    | 1.16869E-07 | 4.4164E-07  |
| TIPIN     | 0.274402682  | 1.17335E-07 | 4.43318E-07 |
| TELO2     | 0.274376551  | 1.17673E-07 | 4.44509E-07 |
| MED20     | 0.274347199  | 1.18053E-07 | 4.45861E-07 |
| GATAD2B   | -0.274308295 | 1.18559E-07 | 4.47687E-07 |
| TNFAIP2   | -0.274295688 | 1.18723E-07 | 4.48223E-07 |
| SLC41A3   | 0.274283961  | 1.18876E-07 | 4.48716E-07 |
| HP1BP3    | -0.274273527 | 1.19013E-07 | 4.49145E-07 |
| NT5C1B    | -0.274200458 | 1.19972E-07 | 4.5268E-07  |
| SNX20     | -0.274155851 | 1.20561E-07 | 4.54817E-07 |
| LPPR1     | 0.274114464  | 1.21111E-07 | 4.56803E-07 |
| ANKRD6    | -0.274016105 | 1.22426E-07 | 4.61675E-07 |
| PPM1D     | -0.274009483 | 1.22515E-07 | 4.61924E-07 |
| CAV2      | -0.274003396 | 1.22597E-07 | 4.62145E-07 |
| ZNF317    | -0.273978526 | 1.22932E-07 | 4.63319E-07 |
| TADA2A    | -0.27397684  | 1.22954E-07 | 4.63319E-07 |
| PIGT      | 0.273969477  | 1.23054E-07 | 4.63605E-07 |
| TMEM87B   | -0.273958014 | 1.23209E-07 | 4.64083E-07 |
| VANGL1    | -0.273956642 | 1.23227E-07 | 4.64083E-07 |

|           |              |             |             |
|-----------|--------------|-------------|-------------|
| FCGR2C    | -0.273875557 | 1.24329E-07 | 4.68142E-07 |
| C15orf37  | -0.27369173  | 1.26861E-07 | 4.77586E-07 |
| TBC1D2    | -0.273683175 | 1.2698E-07  | 4.77944E-07 |
| EFR3A     | -0.273644191 | 1.27523E-07 | 4.799E-07   |
| C9orf131  | -0.273597513 | 1.28178E-07 | 4.8227E-07  |
| TAS2R5    | -0.27354949  | 1.28854E-07 | 4.84723E-07 |
| GUSBL2    | 0.273414355  | 1.30775E-07 | 4.91859E-07 |
| IFIT5     | -0.273398264 | 1.31006E-07 | 4.92633E-07 |
| PHF16     | -0.27339009  | 1.31123E-07 | 4.92981E-07 |
| ARRDC3    | -0.273364772 | 1.31487E-07 | 4.94257E-07 |
| HCST      | 0.273269941  | 1.32859E-07 | 4.9932E-07  |
| ZNF16     | 0.273179524  | 1.3418E-07  | 5.0419E-07  |
| IDH3G     | 0.273175081  | 1.34246E-07 | 5.04339E-07 |
| LDB1      | -0.273173305 | 1.34272E-07 | 5.04342E-07 |
| VCAN      | -0.273168648 | 1.3434E-07  | 5.04504E-07 |
| DAP3      | 0.273136578  | 1.34812E-07 | 5.06182E-07 |
| BAK1      | 0.273130732  | 1.34899E-07 | 5.0641E-07  |
| C2orf27A  | 0.273002284  | 1.36807E-07 | 5.13477E-07 |
| HPCAL1    | 0.272986786  | 1.37039E-07 | 5.14251E-07 |
| TGM3      | 0.272927491  | 1.3793E-07  | 5.17497E-07 |
| SRRT      | 0.272878068  | 1.38677E-07 | 5.20202E-07 |
| GSS       | 0.272869921  | 1.388E-07   | 5.20567E-07 |
| CHN1      | -0.272863071 | 1.38904E-07 | 5.20859E-07 |
| FOXO3     | -0.272847911 | 1.39135E-07 | 5.21624E-07 |
| CPXM2     | -0.272845012 | 1.39179E-07 | 5.21691E-07 |
| FAM72B    | 0.272794456  | 1.3995E-07  | 5.24482E-07 |
| HSPB9     | 0.272762762  | 1.40435E-07 | 5.26202E-07 |
| ZFP30     | -0.272731375 | 1.40917E-07 | 5.27909E-07 |
| FOXP2     | -0.272600346 | 1.42948E-07 | 5.35415E-07 |
| MIA3      | -0.272582868 | 1.43221E-07 | 5.36337E-07 |
| PRR19     | 0.272575917  | 1.43329E-07 | 5.36643E-07 |
| MTUS2     | -0.272510146 | 1.44362E-07 | 5.40407E-07 |
| MOSPD3    | 0.27236109   | 1.46728E-07 | 5.49162E-07 |
| ZDHHC2    | -0.272335241 | 1.47142E-07 | 5.50608E-07 |
| HEY2      | -0.27233352  | 1.4717E-07  | 5.50608E-07 |
| LOC646982 | -0.272322038 | 1.47354E-07 | 5.51194E-07 |
| GALNT7    | -0.272313238 | 1.47496E-07 | 5.5162E-07  |
| CAMK2B    | -0.272300113 | 1.47707E-07 | 5.52306E-07 |
| PLCL2     | -0.272270285 | 1.48188E-07 | 5.54001E-07 |
| GRAMD3    | -0.272247742 | 1.48552E-07 | 5.5521E-07  |
| RGMA      | -0.272245678 | 1.48586E-07 | 5.5521E-07  |
| RNF126    | 0.272245126  | 1.48595E-07 | 5.5521E-07  |
| C9orf172  | -0.272209368 | 1.49175E-07 | 5.57273E-07 |
| C15orf33  | -0.272195494 | 1.49401E-07 | 5.58011E-07 |
| UPF1      | -0.272150093 | 1.50142E-07 | 5.60674E-07 |
| MED13     | -0.272116796 | 1.50687E-07 | 5.62606E-07 |

|            |              |             |             |
|------------|--------------|-------------|-------------|
| RNF185     | -0.27207582  | 1.51361E-07 | 5.65017E-07 |
| CHMP1B     | -0.272064706 | 1.51545E-07 | 5.65595E-07 |
| KLHL3      | -0.272046819 | 1.5184E-07  | 5.66489E-07 |
| SCARNA16   | 0.272046764  | 1.51841E-07 | 5.66489E-07 |
| BAHD1      | -0.272024053 | 1.52217E-07 | 5.67786E-07 |
| PDGFC      | -0.271991652 | 1.52755E-07 | 5.69686E-07 |
| TSPAN11    | -0.271975591 | 1.53023E-07 | 5.70576E-07 |
| EZH2       | 0.271964939  | 1.532E-07   | 5.71131E-07 |
| DNAJB4     | -0.271961599 | 1.53256E-07 | 5.71232E-07 |
| DYRK4      | 0.271932928  | 1.53735E-07 | 5.7291E-07  |
| OPCML      | -0.27190894  | 1.54137E-07 | 5.74301E-07 |
| ATP6AP1    | 0.271888659  | 1.54478E-07 | 5.75462E-07 |
| TRAK2      | -0.271884785 | 1.54543E-07 | 5.75597E-07 |
| C19orf47   | 0.271871231  | 1.54771E-07 | 5.76339E-07 |
| SLC37A3    | -0.271861855 | 1.54929E-07 | 5.7682E-07  |
| C7orf26    | 0.271855944  | 1.55029E-07 | 5.77083E-07 |
| EOMES      | -0.271838747 | 1.55319E-07 | 5.78056E-07 |
| C6orf106   | 0.271770376  | 1.56479E-07 | 5.82264E-07 |
| PVT1       | 0.271760938  | 1.56639E-07 | 5.82753E-07 |
| RPN1       | 0.271736514  | 1.57056E-07 | 5.84194E-07 |
| MAF        | -0.271591759 | 1.59548E-07 | 5.93352E-07 |
| MON1A      | 0.271516752  | 1.60854E-07 | 5.98097E-07 |
| NME4       | 0.271471037  | 1.61655E-07 | 6.00964E-07 |
| TRNT1      | -0.271382098 | 1.63225E-07 | 6.06685E-07 |
| SARS       | 0.271346596  | 1.63855E-07 | 6.08915E-07 |
| MTX3       | -0.271337732 | 1.64013E-07 | 6.09388E-07 |
| C20orf29   | 0.271330604  | 1.6414E-07  | 6.09746E-07 |
| SLC24A3    | -0.271291818 | 1.64833E-07 | 6.12205E-07 |
| EEF1A1     | 0.271250578  | 1.65572E-07 | 6.14838E-07 |
| TMEM56     | -0.271227176 | 1.65994E-07 | 6.16287E-07 |
| AMPH       | -0.27121856  | 1.66149E-07 | 6.16718E-07 |
| LOC401463  | -0.271217295 | 1.66172E-07 | 6.16718E-07 |
| GNGT1      | 0.271214862  | 1.66216E-07 | 6.16766E-07 |
| TAT        | -0.271198269 | 1.66515E-07 | 6.17763E-07 |
| RINL       | 0.271174773  | 1.6694E-07  | 6.19225E-07 |
| DKFZP686I1 | 0.271160987  | 1.6719E-07  | 6.20037E-07 |
| GARS       | 0.27112654   | 1.67817E-07 | 6.22243E-07 |
| UTP14A     | 0.271110593  | 1.68107E-07 | 6.23204E-07 |
| FANCM      | -0.271104941 | 1.6821E-07  | 6.23471E-07 |
| NOM1       | -0.271080218 | 1.68662E-07 | 6.25029E-07 |
| 44082      | -0.27107396  | 1.68777E-07 | 6.25337E-07 |
| HSD17B13   | -0.271015038 | 1.69859E-07 | 6.29229E-07 |
| SQSTM1     | 0.270912143  | 1.71765E-07 | 6.36171E-07 |
| GALR2      | 0.270898521  | 1.72018E-07 | 6.36993E-07 |
| UBB        | 0.270813005  | 1.7362E-07  | 6.42805E-07 |
| PIAS1      | -0.270780932 | 1.74225E-07 | 6.44923E-07 |

|           |              |             |             |
|-----------|--------------|-------------|-------------|
| LPIN1     | -0.270757526 | 1.74667E-07 | 6.4644E-07  |
| ABCA8     | -0.270728883 | 1.7521E-07  | 6.48329E-07 |
| OTUD5     | 0.270718985  | 1.75398E-07 | 6.48904E-07 |
| GABARAPL1 | -0.270707554 | 1.75615E-07 | 6.49587E-07 |
| SH3GLB2   | 0.270702306  | 1.75715E-07 | 6.49836E-07 |
| DNAJC9    | 0.270653675  | 1.76643E-07 | 6.53146E-07 |
| ZNF532    | -0.270643785 | 1.76832E-07 | 6.53725E-07 |
| EPB41     | -0.270634408 | 1.77012E-07 | 6.54268E-07 |
| NCBP1     | -0.270626028 | 1.77173E-07 | 6.5474E-07  |
| KIAA0831  | -0.270575096 | 1.78152E-07 | 6.58239E-07 |
| DCBLD2    | -0.270539951 | 1.78832E-07 | 6.60625E-07 |
| NFYB      | -0.270502242 | 1.79563E-07 | 6.63204E-07 |
| ARHGAP12  | -0.270485264 | 1.79893E-07 | 6.64301E-07 |
| LOC283174 | -0.270472108 | 1.8015E-07  | 6.65015E-07 |
| PRR18     | -0.270471907 | 1.80154E-07 | 6.65015E-07 |
| ZFAND5    | -0.270428828 | 1.80995E-07 | 6.67999E-07 |
| GRIP2     | -0.270426962 | 1.81032E-07 | 6.6801E-07  |
| ACO1      | -0.270406012 | 1.81443E-07 | 6.69402E-07 |
| GPM6B     | -0.270361898 | 1.82311E-07 | 6.72479E-07 |
| ACTR1A    | 0.27034764   | 1.82592E-07 | 6.73393E-07 |
| FAM134B   | -0.270345355 | 1.82637E-07 | 6.73434E-07 |
| PRDX2     | 0.270312536  | 1.83287E-07 | 6.75704E-07 |
| ASB7      | -0.270265909 | 1.84213E-07 | 6.78994E-07 |
| STX10     | 0.270252864  | 1.84473E-07 | 6.79826E-07 |
| TRERF1    | -0.270071754 | 1.8812E-07  | 6.93137E-07 |
| PAM       | -0.270056745 | 1.88425E-07 | 6.94133E-07 |
| GTF2F2    | 0.270024542  | 1.89082E-07 | 6.96424E-07 |
| ITGB1BP2  | 0.270006722  | 1.89446E-07 | 6.97636E-07 |
| ZNF146    | -0.269999606 | 1.89592E-07 | 6.98044E-07 |
| KILLIN    | -0.269997089 | 1.89643E-07 | 6.98105E-07 |
| GATAD2A   | -0.26997817  | 1.90031E-07 | 6.99403E-07 |
| WNT9A     | -0.269968513 | 1.90229E-07 | 6.99959E-07 |
| TRIM58    | -0.26996739  | 1.90253E-07 | 6.99959E-07 |
| SENP2     | -0.269926912 | 1.91086E-07 | 7.02896E-07 |
| OSBPL1A   | -0.269878727 | 1.92083E-07 | 7.06432E-07 |
| SFRS13A   | -0.26987338  | 1.92194E-07 | 7.06709E-07 |
| SYNRG     | -0.269806383 | 1.93589E-07 | 7.11707E-07 |
| GDNF      | -0.269733686 | 1.95113E-07 | 7.1718E-07  |
| TMEM177   | 0.269702153  | 1.95778E-07 | 7.19491E-07 |
| EDAR      | -0.269682834 | 1.96187E-07 | 7.20859E-07 |
| SHISA3    | -0.269677896 | 1.96291E-07 | 7.2111E-07  |
| FAM189B   | 0.269575532  | 1.9847E-07  | 7.28981E-07 |
| DLG2      | -0.26949553  | 2.00189E-07 | 7.3516E-07  |
| TMEM123   | -0.269464294 | 2.00865E-07 | 7.37504E-07 |
| OSBPL9    | -0.269449027 | 2.01195E-07 | 7.38582E-07 |
| KCTD11    | -0.269437897 | 2.01437E-07 | 7.39332E-07 |

|           |              |             |             |
|-----------|--------------|-------------|-------------|
| MRO       | -0.269418949 | 2.01849E-07 | 7.40707E-07 |
| ACYPI     | 0.269393026  | 2.02413E-07 | 7.42642E-07 |
| SNAI1     | -0.269378008 | 2.02741E-07 | 7.43707E-07 |
| C1orf111  | -0.269302466 | 2.04398E-07 | 7.49538E-07 |
| C17orf104 | -0.269302099 | 2.04406E-07 | 7.49538E-07 |
| RORB      | -0.269281544 | 2.04859E-07 | 7.51061E-07 |
| C14orf45  | -0.269275999 | 2.04981E-07 | 7.51371E-07 |
| ATRN      | -0.269247898 | 2.05602E-07 | 7.5351E-07  |
| MYNN      | -0.269224976 | 2.0611E-07  | 7.55233E-07 |
| CCDC25    | -0.269204817 | 2.06558E-07 | 7.56735E-07 |
| C2orf63   | -0.269201347 | 2.06636E-07 | 7.56878E-07 |
| PER1      | -0.269138133 | 2.08046E-07 | 7.61906E-07 |
| ORC1L     | 0.269114358  | 2.0858E-07  | 7.63718E-07 |
| CT45A3    | 0.269104978  | 2.0879E-07  | 7.64349E-07 |
| SNX17     | 0.269089142  | 2.09146E-07 | 7.65512E-07 |
| RBM12B    | -0.269086941 | 2.09196E-07 | 7.65552E-07 |
| AGBL5     | 0.269050745  | 2.10012E-07 | 7.68399E-07 |
| RAB19     | -0.269031236 | 2.10454E-07 | 7.69872E-07 |
| TPR       | -0.268991038 | 2.11366E-07 | 7.73067E-07 |
| IRS1      | -0.268952123 | 2.12252E-07 | 7.76167E-07 |
| EMILIN1   | -0.26894258  | 2.1247E-07  | 7.76821E-07 |
| CD200     | -0.268885301 | 2.13783E-07 | 7.81478E-07 |
| BFSP1     | 0.268854207  | 2.14499E-07 | 7.83951E-07 |
| KRI1      | 0.268846123  | 2.14686E-07 | 7.84277E-07 |
| UTP20     | -0.268845651 | 2.14696E-07 | 7.84277E-07 |
| GPLD1     | -0.268845213 | 2.14707E-07 | 7.84277E-07 |
| TMEM2     | -0.268805456 | 2.15626E-07 | 7.87492E-07 |
| PTGER3    | -0.268777386 | 2.16278E-07 | 7.89727E-07 |
| C10orf105 | -0.26873691  | 2.17221E-07 | 7.93024E-07 |
| CTNNB1    | -0.268703856 | 2.17993E-07 | 7.957E-07   |
| ZNF750    | -0.268677036 | 2.18623E-07 | 7.9785E-07  |
| DYNLT3    | -0.268659691 | 2.1903E-07  | 7.99192E-07 |
| FLJ34503  | -0.268643526 | 2.19411E-07 | 8.00434E-07 |
| ARNT      | -0.268608674 | 2.20234E-07 | 8.03289E-07 |
| FAM131B   | -0.26860228  | 2.20385E-07 | 8.03694E-07 |
| C1orf227  | 0.268545804  | 2.21726E-07 | 8.08435E-07 |
| CLK4      | -0.268480123 | 2.23295E-07 | 8.13907E-07 |
| TXNL1     | 0.268479566  | 2.23308E-07 | 8.13907E-07 |
| TSPAN2    | -0.268475148 | 2.23414E-07 | 8.14144E-07 |
| FAM161A   | -0.268447705 | 2.24073E-07 | 8.16396E-07 |
| NCAPD3    | -0.268382472 | 2.25648E-07 | 8.21981E-07 |
| KIAA0240  | -0.268269694 | 2.28394E-07 | 8.31835E-07 |
| OGN       | -0.268259916 | 2.28634E-07 | 8.32556E-07 |
| C3orf64   | -0.268257459 | 2.28694E-07 | 8.32623E-07 |
| PRR14     | 0.26823283   | 2.29299E-07 | 8.34672E-07 |
| CCR9      | -0.268201432 | 2.30073E-07 | 8.37334E-07 |

|          |              |             |             |
|----------|--------------|-------------|-------------|
| CPSF7    | -0.268172342 | 2.30791E-07 | 8.39797E-07 |
| TBC1D14  | -0.26814992  | 2.31347E-07 | 8.41664E-07 |
| GPR4     | -0.268147323 | 2.31411E-07 | 8.41745E-07 |
| CDC25B   | 0.268133018  | 2.31766E-07 | 8.42883E-07 |
| HAPLN4   | -0.268048139 | 2.33884E-07 | 8.5043E-07  |
| C19orf73 | 0.268010081  | 2.3484E-07  | 8.5375E-07  |
| THBS1    | -0.267985951 | 2.35448E-07 | 8.55804E-07 |
| TFCP2    | -0.26797853  | 2.35635E-07 | 8.56328E-07 |
| VARS2    | 0.267866423  | 2.38482E-07 | 8.66514E-07 |
| SAMD4A   | -0.267805805 | 2.40035E-07 | 8.71997E-07 |
| PTGS2    | -0.267790182 | 2.40436E-07 | 8.73298E-07 |
| ATP5SL   | 0.267776718  | 2.40783E-07 | 8.74398E-07 |
| FNBP4    | -0.267711455 | 2.42471E-07 | 8.80367E-07 |
| UST      | -0.267652016 | 2.44018E-07 | 8.85822E-07 |
| WDR65    | -0.267611266 | 2.45084E-07 | 8.8953E-07  |
| FAM106C  | -0.267562112 | 2.46376E-07 | 8.94056E-07 |
| MIOS     | -0.267554553 | 2.46575E-07 | 8.94616E-07 |
| VKORC1L1 | -0.267533507 | 2.47131E-07 | 8.96469E-07 |
| HSPC157  | 0.267484759  | 2.48423E-07 | 9.0099E-07  |
| HSPA1A   | 0.267483009  | 2.48469E-07 | 9.00994E-07 |
| CCDC71   | 0.267429625  | 2.49891E-07 | 9.05986E-07 |
| PIBF1    | -0.267390505 | 2.50938E-07 | 9.09617E-07 |
| DYSF     | -0.267384169 | 2.51108E-07 | 9.10067E-07 |
| IYD      | -0.267373145 | 2.51404E-07 | 9.10974E-07 |
| TJP2     | -0.267320265 | 2.52829E-07 | 9.1597E-07  |
| TBC1D15  | -0.26730358  | 2.5328E-07  | 9.17437E-07 |
| MDM2     | -0.267295693 | 2.53493E-07 | 9.18043E-07 |
| EWSR1    | 0.267263534  | 2.54366E-07 | 9.21035E-07 |
| NAA16    | -0.267245243 | 2.54863E-07 | 9.22669E-07 |
| APOA2    | 0.267227038  | 2.55359E-07 | 9.24297E-07 |
| SUOX     | -0.267210079 | 2.55822E-07 | 9.25804E-07 |
| CIAPIN1  | 0.267141644  | 2.57699E-07 | 9.32425E-07 |
| TULP4    | -0.267129695 | 2.58028E-07 | 9.33446E-07 |
| BTBD10   | -0.267113037 | 2.58487E-07 | 9.34937E-07 |
| CASZ1    | -0.26706872  | 2.59713E-07 | 9.392E-07   |
| HAS2     | -0.26704577  | 2.60349E-07 | 9.41333E-07 |
| C1orf159 | 0.26701508   | 2.61204E-07 | 9.44249E-07 |
| MGC87042 | 0.267003555  | 2.61525E-07 | 9.4524E-07  |
| RIPK2    | 0.266999702  | 2.61633E-07 | 9.45457E-07 |
| CETN2    | 0.266987426  | 2.61975E-07 | 9.46524E-07 |
| GPR82    | -0.266977022 | 2.62266E-07 | 9.47404E-07 |
| WDR35    | -0.266884594 | 2.64865E-07 | 9.56618E-07 |
| SCAMP2   | 0.266875414  | 2.65125E-07 | 9.57381E-07 |
| CALHM2   | -0.266854922 | 2.65705E-07 | 9.5899E-07  |
| PRKD1    | -0.266854607 | 2.65714E-07 | 9.5899E-07  |
| EHF      | -0.266854572 | 2.65715E-07 | 9.5899E-07  |



|           |              |             |             |
|-----------|--------------|-------------|-------------|
| HMGCLL1   | -0.266820802 | 2.66673E-07 | 9.6226E-07  |
| NDUFS7    | 0.266817853  | 2.66757E-07 | 9.6226E-07  |
| C1orf95   | -0.266817555 | 2.66766E-07 | 9.6226E-07  |
| LOC148696 | -0.266806532 | 2.67079E-07 | 9.63217E-07 |
| POC1B     | -0.266799164 | 2.67289E-07 | 9.63799E-07 |
| C22orf9   | 0.266750708  | 2.68673E-07 | 9.68616E-07 |
| ST3GAL6   | -0.266724771 | 2.69417E-07 | 9.71121E-07 |
| NMNAT2    | -0.266710929 | 2.69815E-07 | 9.72379E-07 |
| CCNL1     | -0.266709198 | 2.69865E-07 | 9.72383E-07 |
| PYY2      | 0.266697981  | 2.70188E-07 | 9.7337E-07  |
| CAMK4     | -0.266564538 | 2.74057E-07 | 9.87129E-07 |
| ULK2      | -0.266552136 | 2.74419E-07 | 9.88255E-07 |
| SHISA5    | 0.266489089  | 2.76268E-07 | 9.94733E-07 |
| CXorf21   | -0.266487028 | 2.76328E-07 | 9.94772E-07 |
| LCMT2     | -0.266439772 | 2.77722E-07 | 9.99609E-07 |
| MCPH1     | -0.266404046 | 2.7878E-07  | 1.00324E-06 |
| ACRV1     | 0.266291916  | 2.82127E-07 | 1.0151E-06  |
| LOC653786 | 0.266282822  | 2.824E-07   | 1.0159E-06  |
| GIMAP2    | -0.266240586 | 2.83672E-07 | 1.02029E-06 |
| ZCRB1     | 0.266230922  | 2.83964E-07 | 1.02115E-06 |
| BHLHA15   | -0.266187814 | 2.85269E-07 | 1.02566E-06 |
| GPX2      | 0.266133828  | 2.86911E-07 | 1.03138E-06 |
| PCMTD1    | -0.266049307 | 2.89501E-07 | 1.0405E-06  |
| CCDC89    | -0.265999053 | 2.91051E-07 | 1.04588E-06 |
| GJC1      | -0.265956657 | 2.92366E-07 | 1.05042E-06 |
| CD300LG   | -0.265917351 | 2.93589E-07 | 1.05462E-06 |
| P2RX3     | -0.265909322 | 2.9384E-07  | 1.05533E-06 |
| THEM5     | -0.265859935 | 2.95385E-07 | 1.06069E-06 |
| C18orf22  | 0.265820245  | 2.96633E-07 | 1.06498E-06 |
| RPL9      | 0.26579758   | 2.97348E-07 | 1.06735E-06 |
| AMDHD2    | 0.265793498  | 2.97477E-07 | 1.06762E-06 |
| TBC1D4    | -0.265728825 | 2.99526E-07 | 1.07479E-06 |
| SKAP2     | -0.265719027 | 2.99838E-07 | 1.07571E-06 |
| NAGK      | 0.265702873  | 3.00352E-07 | 1.07736E-06 |
| NFATC2IP  | -0.265633844 | 3.02561E-07 | 1.08509E-06 |
| RFK       | -0.265600841 | 3.03622E-07 | 1.0887E-06  |
| IL6       | -0.265553796 | 3.05141E-07 | 1.09395E-06 |
| 43897     | -0.265549308 | 3.05287E-07 | 1.09427E-06 |
| KCNJ3     | -0.265513967 | 3.06433E-07 | 1.09819E-06 |
| SMARCAL1  | 0.265500682  | 3.06865E-07 | 1.09954E-06 |
| LOC595101 | -0.265420327 | 3.09491E-07 | 1.10875E-06 |
| ZNF133    | 0.265414249  | 3.09691E-07 | 1.10926E-06 |
| TOR1B     | -0.265407723 | 3.09905E-07 | 1.1098E-06  |
| AVEN      | 0.265406295  | 3.09952E-07 | 1.1098E-06  |
| LAIR2     | 0.26540304   | 3.10059E-07 | 1.10998E-06 |
| BNC1      | -0.265392733 | 3.10398E-07 | 1.11099E-06 |

|           |              |             |             |
|-----------|--------------|-------------|-------------|
| PDGFRA    | -0.265332105 | 3.12399E-07 | 1.11796E-06 |
| GJA1      | -0.265320721 | 3.12776E-07 | 1.1191E-06  |
| ZNF7      | 0.265315983  | 3.12933E-07 | 1.11947E-06 |
| OLFM1     | -0.265276952 | 3.1423E-07  | 1.1239E-06  |
| TSC22D3   | -0.26521492  | 3.16302E-07 | 1.13111E-06 |
| C4orf36   | -0.265176267 | 3.176E-07   | 1.13555E-06 |
| GP1BA     | -0.265173583 | 3.1769E-07  | 1.13567E-06 |
| TTC5      | -0.265142149 | 3.1875E-07  | 1.13925E-06 |
| NLRC3     | -0.265095907 | 3.20314E-07 | 1.14464E-06 |
| ANXA2     | 0.265078208  | 3.20915E-07 | 1.14658E-06 |
| BACE1     | -0.26507547  | 3.21008E-07 | 1.14665E-06 |
| KCNE4     | -0.265074248 | 3.2105E-07  | 1.14665E-06 |
| USP5      | 0.265048513  | 3.21925E-07 | 1.14957E-06 |
| LOC283731 | -0.26501465  | 3.23081E-07 | 1.15349E-06 |
| FAM133B   | -0.264967281 | 3.24705E-07 | 1.15908E-06 |
| SCLT1     | -0.264963968 | 3.24819E-07 | 1.15928E-06 |
| CEP350    | -0.264954106 | 3.25158E-07 | 1.16028E-06 |
| CUL4A     | -0.264880828 | 3.27689E-07 | 1.1691E-06  |
| GBF1      | -0.264869334 | 3.28088E-07 | 1.17031E-06 |
| LTBP3     | -0.264865682 | 3.28215E-07 | 1.17056E-06 |
| AKT2      | -0.264852992 | 3.28655E-07 | 1.17171E-06 |
| ZNF259    | 0.264852953  | 3.28657E-07 | 1.17171E-06 |
| CREB1     | -0.264842206 | 3.29031E-07 | 1.17284E-06 |
| SCARNA2   | 0.264794723  | 3.30687E-07 | 1.17853E-06 |
| YWHAG     | -0.264666603 | 3.35197E-07 | 1.19439E-06 |
| ZHX1      | -0.264615009 | 3.37029E-07 | 1.20071E-06 |
| DENR      | 0.264601925  | 3.37496E-07 | 1.20215E-06 |
| HAS3      | -0.26457624  | 3.38413E-07 | 1.20509E-06 |
| TNFSF15   | -0.264575403 | 3.38443E-07 | 1.20509E-06 |
| PCBD1     | 0.264553901  | 3.39213E-07 | 1.20762E-06 |
| PLEKHO1   | 0.264456108  | 3.42735E-07 | 1.21994E-06 |
| TC2N      | -0.264452694 | 3.42858E-07 | 1.22016E-06 |
| SYNGR4    | 0.264442324  | 3.43234E-07 | 1.22128E-06 |
| FGFR1     | -0.264425821 | 3.43833E-07 | 1.22319E-06 |
| NOS2      | -0.264394545 | 3.4497E-07  | 1.22702E-06 |
| PRKCSH    | 0.264386587  | 3.4526E-07  | 1.22783E-06 |
| PRAP1     | 0.264372232  | 3.45783E-07 | 1.22947E-06 |
| FRMD7     | -0.264338327 | 3.47023E-07 | 1.23366E-06 |
| DDX5      | -0.264320442 | 3.47679E-07 | 1.23572E-06 |
| C11orf21  | -0.26431915  | 3.47726E-07 | 1.23572E-06 |
| NDUFV2    | 0.26424423   | 3.50486E-07 | 1.24531E-06 |
| DAB1      | -0.264193722 | 3.52359E-07 | 1.25174E-06 |
| PCDHAC1   | -0.264189639 | 3.52511E-07 | 1.25205E-06 |
| TGDS      | -0.264176563 | 3.52997E-07 | 1.25356E-06 |
| FOXD4L2   | -0.264142814 | 3.54256E-07 | 1.2578E-06  |
| CPT2      | -0.264116089 | 3.55256E-07 | 1.26113E-06 |

|           |              |             |             |
|-----------|--------------|-------------|-------------|
| XPO7      | -0.264078971 | 3.56649E-07 | 1.26585E-06 |
| C6orf126  | 0.264013953  | 3.59102E-07 | 1.27433E-06 |
| NSUN3     | -0.26398557  | 3.60178E-07 | 1.27792E-06 |
| DIO2      | -0.263969974 | 3.60771E-07 | 1.27979E-06 |
| C3orf32   | 0.263954648  | 3.61354E-07 | 1.28163E-06 |
| C12orf5   | -0.263949545 | 3.61549E-07 | 1.28209E-06 |
| TRIB3     | 0.263943115  | 3.61794E-07 | 1.2827E-06  |
| C2orf39   | 0.263941708  | 3.61847E-07 | 1.2827E-06  |
| GNB2      | 0.263907022  | 3.63172E-07 | 1.28716E-06 |
| C20orf4   | 0.263898961  | 3.63481E-07 | 1.28803E-06 |
| TNFSF18   | -0.26388901  | 3.63862E-07 | 1.28915E-06 |
| KLHL29    | -0.263885529 | 3.63996E-07 | 1.28939E-06 |
| OXA1L     | 0.263883669  | 3.64067E-07 | 1.28942E-06 |
| MAPK8IP3  | -0.263822742 | 3.66411E-07 | 1.29749E-06 |
| PCP2      | 0.263810193  | 3.66896E-07 | 1.29897E-06 |
| PRMT7     | 0.263800274  | 3.67279E-07 | 1.3001E-06  |
| SLC4A10   | -0.263776543 | 3.68198E-07 | 1.30312E-06 |
| TAF12     | 0.263628752  | 3.73972E-07 | 1.32332E-06 |
| STX1A     | 0.263616566  | 3.74452E-07 | 1.32478E-06 |
| CPSF2     | -0.263591964 | 3.75423E-07 | 1.32798E-06 |
| C16orf79  | 0.263569419  | 3.76314E-07 | 1.3309E-06  |
| STRADA    | 0.263497628  | 3.79167E-07 | 1.34075E-06 |
| PCSK6     | -0.263377937 | 3.8397E-07  | 1.35749E-06 |
| ALS2CR11  | -0.263357233 | 3.84807E-07 | 1.36021E-06 |
| LOC349196 | -0.263335886 | 3.85671E-07 | 1.36302E-06 |
| TTK       | 0.26328052   | 3.87922E-07 | 1.37074E-06 |
| ABR       | -0.263252457 | 3.89068E-07 | 1.37454E-06 |
| COIL      | 0.263213516  | 3.90663E-07 | 1.37993E-06 |
| CBLL1     | -0.263187888 | 3.91717E-07 | 1.38341E-06 |
| CT45A2    | 0.263183465  | 3.91899E-07 | 1.38381E-06 |
| RGAG4     | -0.263131176 | 3.94057E-07 | 1.39118E-06 |
| PCDHB6    | -0.263128988 | 3.94148E-07 | 1.39125E-06 |
| ZBTB17    | 0.263111233  | 3.94883E-07 | 1.3936E-06  |
| SGIP1     | -0.263062221 | 3.96921E-07 | 1.40055E-06 |
| WDR13     | 0.263011487  | 3.99041E-07 | 1.40778E-06 |
| LPAR1     | -0.26299738  | 3.99632E-07 | 1.40961E-06 |
| IP6K2     | 0.262980586  | 4.00337E-07 | 1.41185E-06 |
| ZNF780B   | -0.262928203 | 4.02544E-07 | 1.41938E-06 |
| CSTF2T    | -0.262922994 | 4.02765E-07 | 1.41991E-06 |
| FZD8      | -0.262825105 | 4.06923E-07 | 1.43431E-06 |
| CYP4A22   | -0.262782523 | 4.08744E-07 | 1.44048E-06 |
| NFKBIB    | 0.262774709  | 4.09079E-07 | 1.4414E-06  |
| ZSCAN2    | 0.262704275  | 4.12112E-07 | 1.45183E-06 |
| C19orf52  | 0.262620192  | 4.1576E-07  | 1.46443E-06 |
| EFEMP1    | -0.262587168 | 4.17202E-07 | 1.46924E-06 |
| GNRHR     | -0.262573958 | 4.1778E-07  | 1.47102E-06 |

|           |              |             |             |
|-----------|--------------|-------------|-------------|
| BICD2     | -0.262556361 | 4.18551E-07 | 1.47347E-06 |
| PMS2L1    | 0.262541546  | 4.19201E-07 | 1.4755E-06  |
| ZC3H12D   | -0.262538895 | 4.19318E-07 | 1.47565E-06 |
| MRC1      | -0.262524712 | 4.19941E-07 | 1.47758E-06 |
| KTELC1    | -0.262489316 | 4.21501E-07 | 1.48281E-06 |
| BTN3A3    | -0.262470397 | 4.22337E-07 | 1.48549E-06 |
| CDH13     | -0.262403576 | 4.25304E-07 | 1.49566E-06 |
| NEIL3     | 0.262349558  | 4.27716E-07 | 1.50388E-06 |
| RNF207    | -0.262300965 | 4.29897E-07 | 1.51128E-06 |
| SMG6      | -0.262283825 | 4.30669E-07 | 1.51373E-06 |
| SERTAD4   | -0.262251393 | 4.32133E-07 | 1.51861E-06 |
| IL1RAPL2  | -0.262183227 | 4.35227E-07 | 1.52908E-06 |
| OCLM      | -0.262182344 | 4.35267E-07 | 1.52908E-06 |
| SEMA4C    | -0.262166259 | 4.36E-07    | 1.53138E-06 |
| FNDC1     | -0.262148059 | 4.36831E-07 | 1.53403E-06 |
| PRAF2     | 0.262140878  | 4.37159E-07 | 1.53491E-06 |
| NDNL2     | -0.262095116 | 4.39257E-07 | 1.54201E-06 |
| CDH1      | -0.262044078 | 4.41607E-07 | 1.54998E-06 |
| HSD17B3   | 0.261999194  | 4.43685E-07 | 1.557E-06   |
| PBX1      | -0.261956408 | 4.45674E-07 | 1.56371E-06 |
| SLAH1     | -0.261878161 | 4.49333E-07 | 1.57627E-06 |
| MOV10     | 0.261870029  | 4.49715E-07 | 1.57733E-06 |
| FAM173A   | 0.261817965  | 4.52168E-07 | 1.58565E-06 |
| NBEA      | -0.261806297 | 4.52719E-07 | 1.58708E-06 |
| PIGN      | -0.261805603 | 4.52752E-07 | 1.58708E-06 |
| LTB4R2    | -0.261804319 | 4.52813E-07 | 1.58708E-06 |
| ZNF271    | 0.261745792  | 4.55589E-07 | 1.59653E-06 |
| RAB1A     | -0.261710072 | 4.57292E-07 | 1.60221E-06 |
| TRIP12    | -0.261701859 | 4.57684E-07 | 1.6033E-06  |
| GMCL1L    | -0.261670911 | 4.59166E-07 | 1.60821E-06 |
| TM6SF1    | -0.261666339 | 4.59385E-07 | 1.6087E-06  |
| UBL4A     | 0.261612014  | 4.61997E-07 | 1.61756E-06 |
| LSM6      | 0.261583121  | 4.63393E-07 | 1.62216E-06 |
| RHOBTB2   | -0.261569836 | 4.64036E-07 | 1.62413E-06 |
| PRIM1     | 0.261543948  | 4.65291E-07 | 1.62823E-06 |
| SDPR      | -0.261533528 | 4.65797E-07 | 1.62972E-06 |
| C10orf110 | -0.261520611 | 4.66425E-07 | 1.63163E-06 |
| SYCE2     | 0.261465161  | 4.69131E-07 | 1.64081E-06 |
| TTC19     | -0.261450774 | 4.69836E-07 | 1.64298E-06 |
| SPAG4     | 0.261444207  | 4.70158E-07 | 1.64382E-06 |
| ZBTB22    | 0.261413847  | 4.71649E-07 | 1.64874E-06 |
| KCNG2     | -0.261410774 | 4.718E-07   | 1.64898E-06 |
| HDAC1     | 0.261407549  | 4.71959E-07 | 1.64925E-06 |
| FYN       | -0.26133976  | 4.75307E-07 | 1.66066E-06 |
| C10orf2   | 0.261284173  | 4.78069E-07 | 1.67001E-06 |
| B9D2      | 0.261251787  | 4.79686E-07 | 1.67537E-06 |

|           |              |             |             |
|-----------|--------------|-------------|-------------|
| HOXB4     | -0.261244699 | 4.8004E-07  | 1.67631E-06 |
| HEMGN     | -0.261240462 | 4.80252E-07 | 1.67676E-06 |
| C1orf135  | 0.261195034  | 4.82531E-07 | 1.68442E-06 |
| RBM3      | 0.261164085  | 4.8409E-07  | 1.68956E-06 |
| ZNF92     | -0.261145379 | 4.85034E-07 | 1.69256E-06 |
| ARGLU1    | -0.261123287 | 4.86152E-07 | 1.69616E-06 |
| UBAP1     | -0.261102858 | 4.87187E-07 | 1.69948E-06 |
| KISS1     | 0.261064353  | 4.89145E-07 | 1.70601E-06 |
| TNIK      | -0.261048642 | 4.89946E-07 | 1.7085E-06  |
| E4F1      | 0.260959884  | 4.94494E-07 | 1.72406E-06 |
| COL6A2    | -0.260945301 | 4.95246E-07 | 1.72638E-06 |
| PMS2CL    | -0.260936657 | 4.95691E-07 | 1.72763E-06 |
| BRD9      | 0.26092129   | 4.96485E-07 | 1.7301E-06  |
| WNT2      | -0.260916872 | 4.96713E-07 | 1.73059E-06 |
| SUCLG2    | -0.260859687 | 4.99678E-07 | 1.74061E-06 |
| SPARC     | -0.260804234 | 5.02569E-07 | 1.75038E-06 |
| LIG1      | 0.260740583  | 5.05908E-07 | 1.7617E-06  |
| NDOR1     | 0.260735006  | 5.06201E-07 | 1.76241E-06 |
| MSN       | -0.260730726 | 5.06427E-07 | 1.76289E-06 |
| MCTP2     | -0.260612197 | 5.12706E-07 | 1.78444E-06 |
| DCLRE1C   | 0.260597209  | 5.13506E-07 | 1.78691E-06 |
| ARL5A     | -0.260589968 | 5.13892E-07 | 1.78794E-06 |
| HAUS2     | -0.260587611 | 5.14018E-07 | 1.78807E-06 |
| C20orf107 | 0.260585099  | 5.14153E-07 | 1.78822E-06 |
| LOC645752 | -0.260517995 | 5.17751E-07 | 1.80042E-06 |
| SLC9A6    | -0.260453788 | 5.21216E-07 | 1.81215E-06 |
| ITPR3     | -0.260394147 | 5.24455E-07 | 1.8231E-06  |
| S100A1    | 0.260330545  | 5.2793E-07  | 1.83486E-06 |
| MSMB      | 0.260292719  | 5.30007E-07 | 1.84175E-06 |
| BSG       | 0.26027365   | 5.31057E-07 | 1.84508E-06 |
| OR2B6     | 0.260264728  | 5.31549E-07 | 1.84647E-06 |
| PARP14    | -0.260257903 | 5.31926E-07 | 1.84746E-06 |
| ZNF764    | 0.26024486   | 5.32647E-07 | 1.84964E-06 |
| RPL3      | 0.260235326  | 5.33174E-07 | 1.85114E-06 |
| ZFP1      | -0.260226213 | 5.33679E-07 | 1.85257E-06 |
| PIGF      | 0.260208477  | 5.34662E-07 | 1.85566E-06 |
| PSMD6     | 0.260202015  | 5.3502E-07  | 1.85658E-06 |
| EXOSC9    | 0.260155726  | 5.37596E-07 | 1.8652E-06  |
| SLC43A1   | 0.260153824  | 5.37702E-07 | 1.86524E-06 |
| C2        | 0.260141811  | 5.38373E-07 | 1.86704E-06 |
| LINGO4    | -0.260141175 | 5.38409E-07 | 1.86704E-06 |
| GP5       | -0.2600965   | 5.4091E-07  | 1.87539E-06 |
| BCL2L13   | -0.25997549  | 5.4774E-07  | 1.89874E-06 |
| IGF1      | -0.259933192 | 5.50147E-07 | 1.90675E-06 |
| PAN2      | -0.259928346 | 5.50424E-07 | 1.90738E-06 |
| C11orf75  | 0.259899838  | 5.52052E-07 | 1.91269E-06 |

|           |              |             |             |
|-----------|--------------|-------------|-------------|
| E2F2      | 0.259847203  | 5.55072E-07 | 1.92281E-06 |
| KLHL33    | -0.259792759 | 5.58212E-07 | 1.93335E-06 |
| FAM64A    | 0.259757669  | 5.60245E-07 | 1.94006E-06 |
| KIAA1919  | -0.259751235 | 5.60618E-07 | 1.94101E-06 |
| GPN1      | 0.25974751   | 5.60834E-07 | 1.94142E-06 |
| ZNF304    | -0.25973605  | 5.615E-07   | 1.94339E-06 |
| CCDC42B   | 0.259671564  | 5.65263E-07 | 1.95607E-06 |
| ZNF703    | -0.259668329 | 5.65452E-07 | 1.95639E-06 |
| SRP68     | 0.259656918  | 5.66121E-07 | 1.95836E-06 |
| IDH3A     | -0.259634671 | 5.67426E-07 | 1.96254E-06 |
| LRRC46    | 0.259622164  | 5.68161E-07 | 1.96474E-06 |
| TAPBP     | 0.25961704   | 5.68463E-07 | 1.96544E-06 |
| C10orf78  | 0.259601791  | 5.69361E-07 | 1.9682E-06  |
| THAP5     | -0.25958737  | 5.70211E-07 | 1.9708E-06  |
| TMEM200A  | -0.259572227 | 5.71106E-07 | 1.97342E-06 |
| GALNTL1   | -0.259571203 | 5.71166E-07 | 1.97342E-06 |
| MOBK2B    | -0.259530098 | 5.73601E-07 | 1.98149E-06 |
| SLC14A1   | -0.259501002 | 5.75331E-07 | 1.98712E-06 |
| OGT       | -0.259484034 | 5.76342E-07 | 1.99026E-06 |
| SLC6A6    | -0.259479563 | 5.76608E-07 | 1.99084E-06 |
| WDR17     | -0.25941167  | 5.80672E-07 | 2.00452E-06 |
| TRAF3IP2  | -0.259384905 | 5.82282E-07 | 2.00918E-06 |
| FTSJ1     | 0.259384584  | 5.82301E-07 | 2.00918E-06 |
| RUFY1     | 0.259384196  | 5.82325E-07 | 2.00918E-06 |
| SUSD5     | -0.25934495  | 5.84693E-07 | 2.017E-06   |
| NUP54     | -0.259305568 | 5.87079E-07 | 2.02488E-06 |
| C20orf191 | 0.259140721  | 5.97167E-07 | 2.05932E-06 |
| CDK11A    | -0.259128723 | 5.97907E-07 | 2.06152E-06 |
| EIF2AK1   | 0.259038005  | 6.03536E-07 | 2.08057E-06 |
| C20orf11  | 0.259030654  | 6.03995E-07 | 2.08167E-06 |
| FAM186A   | 0.259029503  | 6.04067E-07 | 2.08167E-06 |
| NLRC5     | -0.259007031 | 6.0547E-07  | 2.08615E-06 |
| RHEBL1    | 0.258996746  | 6.06113E-07 | 2.088E-06   |
| GATA2     | -0.258955729 | 6.08686E-07 | 2.0965E-06  |
| RNMTL1    | 0.258862084  | 6.14598E-07 | 2.1165E-06  |
| ZGLP1     | 0.2588467    | 6.15574E-07 | 2.11949E-06 |
| PSMC2     | 0.258804369  | 6.18269E-07 | 2.1284E-06  |
| FHL3      | 0.258798117  | 6.18668E-07 | 2.12941E-06 |
| C21orf45  | 0.258674196  | 6.26626E-07 | 2.15643E-06 |
| FAM114A2  | -0.258655073 | 6.27863E-07 | 2.16031E-06 |
| DCTN6     | -0.25864129  | 6.28756E-07 | 2.16301E-06 |
| GATM      | -0.258635757 | 6.29114E-07 | 2.1636E-06  |
| CRBN      | -0.258635314 | 6.29143E-07 | 2.1636E-06  |
| C17orf64  | 0.258619085  | 6.30197E-07 | 2.16685E-06 |
| TMED7-TIC | -0.25861063  | 6.30746E-07 | 2.16836E-06 |
| PRDM1     | -0.258599607 | 6.31463E-07 | 2.17045E-06 |

|          |              |             |             |
|----------|--------------|-------------|-------------|
| FAM122C  | -0.258558593 | 6.34139E-07 | 2.17927E-06 |
| AHR      | -0.258533539 | 6.35778E-07 | 2.18453E-06 |
| FAM160A1 | -0.2585163   | 6.36909E-07 | 2.18803E-06 |
| EIF2AK2  | -0.258502304 | 6.37828E-07 | 2.19081E-06 |
| BCL8     | -0.258490868 | 6.3858E-07  | 2.19302E-06 |
| ATP5G3   | 0.258479028  | 6.3936E-07  | 2.19532E-06 |
| C7orf11  | 0.2583744    | 6.46288E-07 | 2.21872E-06 |
| CHGA     | 0.258366061  | 6.46843E-07 | 2.22025E-06 |
| RHOBTB3  | -0.25835877  | 6.47329E-07 | 2.22153E-06 |
| DLX2     | 0.258282025  | 6.52465E-07 | 2.23877E-06 |
| NLGN3    | -0.258227209 | 6.56157E-07 | 2.25105E-06 |
| PNMA3    | 0.258153431  | 6.61157E-07 | 2.26782E-06 |
| RPF1     | 0.25813609   | 6.62338E-07 | 2.27148E-06 |
| DUSP6    | -0.258128203 | 6.62876E-07 | 2.27293E-06 |
| RNF182   | -0.258105883 | 6.644E-07   | 2.27776E-06 |
| POLR1B   | -0.258077444 | 6.66346E-07 | 2.28404E-06 |
| TACR1    | -0.258060241 | 6.67526E-07 | 2.28769E-06 |
| PRKACA   | -0.258048832 | 6.6831E-07  | 2.28999E-06 |
| RFX1     | -0.25804132  | 6.68827E-07 | 2.29136E-06 |
| WBP2     | 0.258019621  | 6.70321E-07 | 2.29588E-06 |
| HECTD2   | -0.258018831 | 6.70375E-07 | 2.29588E-06 |
| CDC6     | 0.258001337  | 6.71582E-07 | 2.29962E-06 |
| SEPW1    | 0.257987326  | 6.72551E-07 | 2.30253E-06 |
| ITGA11   | -0.257884427 | 6.79703E-07 | 2.32662E-06 |
| ASB15    | -0.257845324 | 6.8244E-07  | 2.33559E-06 |
| PPAPDC2  | -0.25780571  | 6.85223E-07 | 2.34471E-06 |
| SERTAD2  | -0.257777808 | 6.8719E-07  | 2.35104E-06 |
| FAM27C   | 0.257753008  | 6.88943E-07 | 2.35663E-06 |
| THOC2    | -0.257735552 | 6.9018E-07  | 2.36046E-06 |
| RPIA     | 0.257720993  | 6.91213E-07 | 2.36358E-06 |
| BMP8A    | -0.257625776 | 6.98004E-07 | 2.3864E-06  |
| OGFR     | 0.257623541  | 6.98165E-07 | 2.38653E-06 |
| LRIG3    | -0.257616949 | 6.98637E-07 | 2.38774E-06 |
| CNDP1    | -0.257586639 | 7.00815E-07 | 2.39477E-06 |
| AMMECR1  | -0.257577998 | 7.01436E-07 | 2.39648E-06 |
| PANK3    | -0.257559912 | 7.0274E-07  | 2.40053E-06 |
| CBFA2T3  | -0.257492856 | 7.07593E-07 | 2.41648E-06 |
| IL2RB    | -0.257492012 | 7.07654E-07 | 2.41648E-06 |
| PAPD5    | -0.257420317 | 7.12878E-07 | 2.43391E-06 |
| OTUD1    | -0.257394546 | 7.14765E-07 | 2.43993E-06 |
| TMLHE    | -0.257351184 | 7.17951E-07 | 2.45039E-06 |
| MAP1LC3C | -0.257337071 | 7.18991E-07 | 2.45351E-06 |
| CDR2     | -0.257320051 | 7.20247E-07 | 2.45738E-06 |
| MOSC2    | -0.257299111 | 7.21795E-07 | 2.46224E-06 |
| CT45A5   | 0.257289769  | 7.22487E-07 | 2.46361E-06 |
| COG4     | 0.257289592  | 7.225E-07   | 2.46361E-06 |

|           |              |             |             |
|-----------|--------------|-------------|-------------|
| ANAPC16   | 0.257288664  | 7.22569E-07 | 2.46361E-06 |
| ETV4      | 0.257261052  | 7.24617E-07 | 2.47017E-06 |
| NOB1      | 0.257221007  | 7.27598E-07 | 2.47991E-06 |
| RTKN2     | 0.257207669  | 7.28593E-07 | 2.48288E-06 |
| PRPF40A   | -0.257133456 | 7.34155E-07 | 2.5014E-06  |
| CUL9      | 0.257084663  | 7.37834E-07 | 2.51351E-06 |
| SNAPC2    | 0.25708079   | 7.38127E-07 | 2.51407E-06 |
| ZBTB46    | -0.257062262 | 7.39529E-07 | 2.51842E-06 |
| CSNK1A1   | -0.257021997 | 7.42585E-07 | 2.52839E-06 |
| DLGAP5    | 0.256846992  | 7.56009E-07 | 2.57366E-06 |
| KIAA0114  | 0.256843066  | 7.56313E-07 | 2.57426E-06 |
| MCL1      | -0.256796349 | 7.59937E-07 | 2.58615E-06 |
| SILV      | -0.256793051 | 7.60194E-07 | 2.58658E-06 |
| LRRN2     | -0.256782139 | 7.61043E-07 | 2.58903E-06 |
| COPS7B    | 0.256766973  | 7.62224E-07 | 2.5926E-06  |
| POPDC3    | 0.256758206  | 7.62908E-07 | 2.59449E-06 |
| COL1A2    | -0.256748252 | 7.63686E-07 | 2.59669E-06 |
| ZFC3H1    | -0.256709864 | 7.6669E-07  | 2.60646E-06 |
| TTLL1     | 0.256595982  | 7.7567E-07  | 2.63654E-06 |
| UBE4A     | -0.25656071  | 7.78472E-07 | 2.64561E-06 |
| HS3ST1    | -0.256444407 | 7.8778E-07  | 2.67678E-06 |
| POLE2     | 0.256372548  | 7.93584E-07 | 2.69605E-06 |
| XCL1      | 0.256327979  | 7.97204E-07 | 2.70788E-06 |
| C10orf125 | 0.256298404  | 7.99615E-07 | 2.71561E-06 |
| C14orf21  | -0.256291466 | 8.00182E-07 | 2.71707E-06 |
| RNF138    | -0.256268837 | 8.02032E-07 | 2.72289E-06 |
| SPDYE1    | -0.256221721 | 8.05899E-07 | 2.73555E-06 |
| CLEC16A   | -0.256212425 | 8.06664E-07 | 2.73768E-06 |
| ILDR2     | -0.256198332 | 8.07825E-07 | 2.74116E-06 |
| VAMP7     | -0.256176503 | 8.09627E-07 | 2.7468E-06  |
| DENND1C   | -0.256172645 | 8.09946E-07 | 2.74741E-06 |
| CTAGE6    | -0.256086719 | 8.17078E-07 | 2.77114E-06 |
| AIFM3     | 0.256027698  | 8.22012E-07 | 2.78739E-06 |
| NUDT10    | -0.256007715 | 8.23689E-07 | 2.7926E-06  |
| LAMC2     | -0.255995284 | 8.24734E-07 | 2.79567E-06 |
| PAX8      | 0.255977056  | 8.26268E-07 | 2.8004E-06  |
| TAF1B     | -0.255943698 | 8.29083E-07 | 2.80946E-06 |
| ANXA8L2   | -0.25587728  | 8.34715E-07 | 2.82806E-06 |
| DDX26B    | -0.255823581 | 8.39296E-07 | 2.8431E-06  |
| ZNF181    | -0.25580123  | 8.4121E-07  | 2.8491E-06  |
| USP51     | -0.255787837 | 8.42358E-07 | 2.8525E-06  |
| FPR3      | -0.255760946 | 8.44669E-07 | 2.85984E-06 |
| MARVELD1  | -0.255746901 | 8.45879E-07 | 2.86345E-06 |
| KLRAQ1    | -0.255702884 | 8.4968E-07  | 2.87583E-06 |
| SMCR8     | -0.255691782 | 8.50641E-07 | 2.87859E-06 |
| SGMS1     | -0.25564849  | 8.544E-07   | 2.89082E-06 |



|           |              |             |             |
|-----------|--------------|-------------|-------------|
| PAAF1     | 0.255623442  | 8.56581E-07 | 2.89771E-06 |
| AKR1C2    | 0.255551169  | 8.62907E-07 | 2.91861E-06 |
| RMRP      | 0.25552629   | 8.65095E-07 | 2.92552E-06 |
| DIRC2     | -0.255436765 | 8.73011E-07 | 2.95179E-06 |
| ZNF516    | -0.255428925 | 8.73708E-07 | 2.95364E-06 |
| ATPAF2    | 0.255419069  | 8.74585E-07 | 2.9561E-06  |
| LOC285033 | -0.2553745   | 8.78558E-07 | 2.96903E-06 |
| C21orf88  | -0.255335628 | 8.82039E-07 | 2.98028E-06 |
| RALB      | -0.255286395 | 8.86465E-07 | 2.99473E-06 |
| ZBED3     | -0.255274975 | 8.87495E-07 | 2.9977E-06  |
| FPGT      | -0.25527227  | 8.87739E-07 | 2.99802E-06 |
| GPR19     | 0.255122016  | 9.014E-07   | 3.04364E-06 |
| C6orf41   | 0.255116833  | 9.01875E-07 | 3.04473E-06 |
| FGF18     | -0.255096278 | 9.0376E-07  | 3.05057E-06 |
| NXNL2     | -0.254923654 | 9.19744E-07 | 3.104E-06   |
| ADAM19    | -0.254865647 | 9.25175E-07 | 3.1218E-06  |
| OTUD7A    | -0.254856155 | 9.26067E-07 | 3.12428E-06 |
| EIF2S3    | 0.254806258  | 9.30768E-07 | 3.13961E-06 |
| GOLGA6A   | -0.25477453  | 9.33769E-07 | 3.1492E-06  |
| LOC728743 | 0.254765713  | 9.34605E-07 | 3.15148E-06 |
| CARHSP1   | 0.254759268  | 9.35216E-07 | 3.15301E-06 |
| SLC25A37  | -0.254724007 | 9.38567E-07 | 3.16377E-06 |
| BBS2      | -0.254722162 | 9.38743E-07 | 3.16383E-06 |
| GALNT4    | -0.25468249  | 9.42528E-07 | 3.17605E-06 |
| PLBD2     | -0.254678716 | 9.42888E-07 | 3.17673E-06 |
| HNRNPM    | 0.254640934  | 9.46508E-07 | 3.18838E-06 |
| C16orf48  | 0.254629033  | 9.47651E-07 | 3.19169E-06 |
| GRK5      | -0.254623117 | 9.48219E-07 | 3.19307E-06 |
| SIP1      | 0.25459919   | 9.50522E-07 | 3.20028E-06 |
| MMP14     | -0.2545749   | 9.52866E-07 | 3.20763E-06 |
| PANK4     | -0.254554479 | 9.5484E-07  | 3.21373E-06 |
| SEC16A    | -0.254527976 | 9.57409E-07 | 3.22183E-06 |
| SLC39A8   | -0.254495838 | 9.60532E-07 | 3.23179E-06 |
| ADAMTSL2  | -0.254479948 | 9.6208E-07  | 3.23646E-06 |
| GINS1     | 0.254432589  | 9.66707E-07 | 3.25147E-06 |
| AK7       | -0.254408167 | 9.69102E-07 | 3.25898E-06 |
| RPS15AP10 | -0.254385375 | 9.71342E-07 | 3.26596E-06 |
| SH3YL1    | -0.254382917 | 9.71584E-07 | 3.26622E-06 |
| UBA3      | -0.254315041 | 9.78286E-07 | 3.2882E-06  |
| TRUB2     | 0.254305754  | 9.79206E-07 | 3.29073E-06 |
| P704P     | -0.254297574 | 9.80018E-07 | 3.29291E-06 |
| PNPLA3    | -0.254227964 | 9.86948E-07 | 3.31563E-06 |
| TRIOBP    | -0.254197343 | 9.90012E-07 | 3.32536E-06 |
| OCEL1     | 0.254119707  | 9.9782E-07  | 3.35103E-06 |
| EFHD1     | -0.254046075 | 1.00528E-06 | 3.37551E-06 |
| KBTBD8    | -0.254035773 | 1.00633E-06 | 3.37846E-06 |

|          |              |             |             |
|----------|--------------|-------------|-------------|
| RNF4     | -0.254000452 | 1.00993E-06 | 3.38998E-06 |
| SNX15    | 0.253982048  | 1.01181E-06 | 3.39572E-06 |
| ULBP3    | -0.25393327  | 1.01681E-06 | 3.41194E-06 |
| CAPRN2   | -0.253808768 | 1.02969E-06 | 3.45456E-06 |
| HNF1A    | 0.253772214  | 1.0335E-06  | 3.46676E-06 |
| FAM102A  | -0.253725612 | 1.03838E-06 | 3.48253E-06 |
| GANAB    | -0.253709589 | 1.04006E-06 | 3.48758E-06 |
| MRPL1    | 0.253655441  | 1.04576E-06 | 3.50612E-06 |
| GALNT3   | -0.253619242 | 1.04959E-06 | 3.51836E-06 |
| C8orf73  | 0.253538307  | 1.0582E-06  | 3.54663E-06 |
| PRELP    | -0.253529667 | 1.05912E-06 | 3.54913E-06 |
| NUDT14   | 0.253455736  | 1.06706E-06 | 3.5751E-06  |
| DDX28    | 0.253448878  | 1.06779E-06 | 3.57698E-06 |
| B4GALT5  | -0.253422109 | 1.07068E-06 | 3.58605E-06 |
| BNIP3L   | -0.253388736 | 1.07429E-06 | 3.59753E-06 |
| CSTL1    | 0.253342354  | 1.07933E-06 | 3.6138E-06  |
| C17orf58 | 0.253326979  | 1.081E-06   | 3.61879E-06 |
| TMEM231  | -0.253320757 | 1.08168E-06 | 3.62046E-06 |
| FOXO4    | -0.253302729 | 1.08365E-06 | 3.62643E-06 |
| LAMB1    | -0.253294426 | 1.08456E-06 | 3.62886E-06 |
| GEN1     | -0.25327887  | 1.08626E-06 | 3.63395E-06 |
| ASNA1    | 0.253202946  | 1.09461E-06 | 3.66125E-06 |
| WNT2B    | -0.253181697 | 1.09695E-06 | 3.66848E-06 |
| COX7A2L  | 0.253164189  | 1.09889E-06 | 3.67435E-06 |
| FECH     | -0.253092691 | 1.10684E-06 | 3.70029E-06 |
| SAP18    | 0.253038615  | 1.11288E-06 | 3.71988E-06 |
| EBF1     | -0.253030904 | 1.11375E-06 | 3.72214E-06 |
| TMEM120B | 0.253022441  | 1.1147E-06  | 3.72469E-06 |
| SGEF     | -0.252964711 | 1.12119E-06 | 3.74578E-06 |
| CCDC51   | 0.252961813  | 1.12152E-06 | 3.74624E-06 |
| ST3GAL3  | 0.252950772  | 1.12277E-06 | 3.74977E-06 |
| DQX1     | 0.252949132  | 1.12295E-06 | 3.74977E-06 |
| CLCN4    | -0.252936138 | 1.12442E-06 | 3.75397E-06 |
| SRD5A1   | -0.252934681 | 1.12459E-06 | 3.75397E-06 |
| MNAT1    | 0.252878486  | 1.13097E-06 | 3.77463E-06 |
| UGT1A3   | -0.252825513 | 1.13701E-06 | 3.79418E-06 |
| C7orf44  | 0.25281714   | 1.13797E-06 | 3.79674E-06 |
| SMPD2    | 0.252758462  | 1.14471E-06 | 3.81858E-06 |
| TCF19    | 0.252737697  | 1.1471E-06  | 3.82592E-06 |
| KLHL6    | -0.252713406 | 1.14991E-06 | 3.83464E-06 |
| ZNF507   | -0.252658688 | 1.15626E-06 | 3.85516E-06 |
| WLS      | -0.252584638 | 1.1649E-06  | 3.88331E-06 |
| DGKZ     | 0.252555861  | 1.16827E-06 | 3.89391E-06 |
| NCEH1    | -0.252552772 | 1.16863E-06 | 3.89447E-06 |
| TSTA3    | 0.252529036  | 1.17143E-06 | 3.9026E-06  |
| MAPK10   | -0.252528695 | 1.17147E-06 | 3.9026E-06  |

|           |              |             |             |
|-----------|--------------|-------------|-------------|
| ZBTB33    | -0.252504157 | 1.17436E-06 | 3.91158E-06 |
| VIPR1     | -0.25243653  | 1.18237E-06 | 3.93759E-06 |
| TANC2     | -0.25237062  | 1.19022E-06 | 3.96309E-06 |
| C13orf33  | -0.252333941 | 1.19461E-06 | 3.97705E-06 |
| TSSK6     | -0.252279809 | 1.20112E-06 | 3.99805E-06 |
| SQRDL     | 0.252270377  | 1.20226E-06 | 4.00117E-06 |
| MPZL2     | -0.252246114 | 1.20519E-06 | 4.01026E-06 |
| USP10     | -0.252159171 | 1.21575E-06 | 4.04473E-06 |
| EID1      | -0.252137569 | 1.21839E-06 | 4.05283E-06 |
| CAMSAP1L1 | -0.252069115 | 1.22679E-06 | 4.08008E-06 |
| SSH2      | -0.252041966 | 1.23013E-06 | 4.09052E-06 |
| RCAN2     | -0.252019452 | 1.23292E-06 | 4.09908E-06 |
| VPS8      | -0.251962873 | 1.23993E-06 | 4.12172E-06 |
| MYO5C     | -0.251917598 | 1.24557E-06 | 4.13978E-06 |
| LOC729234 | 0.251888355  | 1.24923E-06 | 4.15124E-06 |
| PQLC3     | -0.251877692 | 1.25056E-06 | 4.15498E-06 |
| CCNB1IP1  | 0.251860646  | 1.2527E-06  | 4.16139E-06 |
| ABCD2     | -0.251847397 | 1.25437E-06 | 4.16623E-06 |
| CBX7      | -0.251750637 | 1.26659E-06 | 4.20611E-06 |
| LOC100129 | -0.251715944 | 1.27099E-06 | 4.22005E-06 |
| LOC644165 | 0.251662901  | 1.27776E-06 | 4.24121E-06 |
| EFCAB10   | -0.251662678 | 1.27779E-06 | 4.24121E-06 |
| FAM3A     | 0.251554908  | 1.29165E-06 | 4.2865E-06  |
| GFRA1     | -0.251472865 | 1.3023E-06  | 4.32112E-06 |
| UNC13B    | -0.251468731 | 1.30284E-06 | 4.32215E-06 |
| MSTN      | -0.251467162 | 1.30305E-06 | 4.32215E-06 |
| DDHD1     | -0.251435237 | 1.30721E-06 | 4.33525E-06 |
| C6orf186  | -0.251422461 | 1.30889E-06 | 4.34007E-06 |
| IL7       | -0.251348905 | 1.31855E-06 | 4.37125E-06 |
| ATG9A     | 0.251347569  | 1.31873E-06 | 4.37125E-06 |
| APLNR     | -0.25133078  | 1.32094E-06 | 4.37787E-06 |
| LOC348926 | 0.251303298  | 1.32458E-06 | 4.38918E-06 |
| C10orf11  | 0.251277862  | 1.32795E-06 | 4.39963E-06 |
| MLH3      | -0.251260066 | 1.33032E-06 | 4.40673E-06 |
| TNNI2     | 0.251252543  | 1.33132E-06 | 4.40931E-06 |
| AASS      | -0.251248673 | 1.33183E-06 | 4.41028E-06 |
| NXF3      | -0.251228677 | 1.3345E-06  | 4.41837E-06 |
| CCAR1     | -0.251219515 | 1.33572E-06 | 4.42168E-06 |
| SCYL3     | -0.25120649  | 1.33746E-06 | 4.42671E-06 |
| NOS1      | -0.251125257 | 1.34836E-06 | 4.46205E-06 |
| PLCB4     | -0.251103644 | 1.35127E-06 | 4.47095E-06 |
| MMP2      | -0.251060536 | 1.35711E-06 | 4.4895E-06  |
| SLC9A8    | -0.250984964 | 1.36739E-06 | 4.52276E-06 |
| ART4      | -0.25097975  | 1.3681E-06  | 4.52436E-06 |
| C6orf170  | -0.250940618 | 1.37345E-06 | 4.54132E-06 |
| PABPC5    | -0.250908611 | 1.37785E-06 | 4.55509E-06 |

|          |              |             |             |
|----------|--------------|-------------|-------------|
| MATN2    | -0.250880264 | 1.38175E-06 | 4.56724E-06 |
| C6orf81  | 0.250868136  | 1.38343E-06 | 4.57202E-06 |
| RBM41    | -0.250823282 | 1.38963E-06 | 4.59176E-06 |
| ETV3L    | -0.250820212 | 1.39006E-06 | 4.59241E-06 |
| DYNC1LI1 | 0.250745489  | 1.40046E-06 | 4.626E-06   |
| KIAA1984 | 0.250698893  | 1.40698E-06 | 4.64678E-06 |
| WRNIP1   | 0.250611379  | 1.41932E-06 | 4.68673E-06 |
| RHOB     | -0.250603967 | 1.42037E-06 | 4.68942E-06 |
| CHTF18   | 0.25056711   | 1.42559E-06 | 4.7059E-06  |
| UCHL3    | 0.250495192  | 1.43585E-06 | 4.73896E-06 |
| PTGDR    | -0.250492356 | 1.43625E-06 | 4.73952E-06 |
| IGF1R    | -0.250480061 | 1.43801E-06 | 4.74454E-06 |
| PLGLA    | -0.250445014 | 1.44304E-06 | 4.76035E-06 |
| PMM2     | 0.250373183  | 1.45341E-06 | 4.79374E-06 |
| GPR153   | -0.250325075 | 1.46039E-06 | 4.81596E-06 |
| BUD13    | 0.250290616  | 1.4654E-06  | 4.83171E-06 |
| ATXN7L3B | -0.250272097 | 1.46811E-06 | 4.83983E-06 |
| LRRC70   | -0.250261339 | 1.46968E-06 | 4.84421E-06 |
| ING4     | 0.250219815  | 1.47577E-06 | 4.86347E-06 |
| ALPL     | -0.25019299  | 1.47971E-06 | 4.87566E-06 |
| PCDHGC3  | -0.250084523 | 1.49577E-06 | 4.92775E-06 |
| AMT      | 0.250079718  | 1.49648E-06 | 4.92929E-06 |
| SGTA     | 0.250028189  | 1.50417E-06 | 4.9538E-06  |
| NAA20    | 0.25002519   | 1.50462E-06 | 4.95446E-06 |
| CMTM7    | 0.24998405   | 1.51079E-06 | 4.97394E-06 |
| VCPIP1   | -0.249969631 | 1.51296E-06 | 4.98026E-06 |
| SPAG7    | 0.249921222  | 1.52026E-06 | 5.00345E-06 |
| CRISPLD1 | -0.249911052 | 1.52179E-06 | 5.00769E-06 |
| MED16    | 0.249892405  | 1.52462E-06 | 5.01615E-06 |
| SLC25A30 | -0.249853765 | 1.53048E-06 | 5.03462E-06 |
| C22orf43 | 0.249826739  | 1.5346E-06  | 5.04732E-06 |
| SMARCE1  | 0.249790126  | 1.54019E-06 | 5.06488E-06 |
| ACTR3    | -0.249739758 | 1.54792E-06 | 5.08944E-06 |
| PGBD3    | -0.249702874 | 1.5536E-06  | 5.10728E-06 |
| PRICKLE2 | -0.249680259 | 1.55709E-06 | 5.11792E-06 |
| SIRPA    | -0.249565879 | 1.57487E-06 | 5.17551E-06 |
| ESCO1    | -0.249556639 | 1.57632E-06 | 5.1794E-06  |
| WDR25    | 0.249507793  | 1.58398E-06 | 5.20371E-06 |
| TLK2     | 0.249481486  | 1.58812E-06 | 5.21642E-06 |
| RNF166   | 0.249479892  | 1.58837E-06 | 5.21642E-06 |
| SPHK1    | 0.249478094  | 1.58865E-06 | 5.21649E-06 |
| FAM71E1  | 0.249448307  | 1.59335E-06 | 5.23106E-06 |
| FKBP7    | -0.249424189 | 1.59717E-06 | 5.24273E-06 |
| SLC39A5  | 0.249409912  | 1.59943E-06 | 5.24929E-06 |
| COG5     | -0.249387082 | 1.60306E-06 | 5.26033E-06 |
| HIST1H1B | 0.249369782  | 1.60581E-06 | 5.26849E-06 |

|           |              |             |             |
|-----------|--------------|-------------|-------------|
| JMJD5     | -0.249367996 | 1.6061E-06  | 5.26856E-06 |
| BCL2L11   | -0.249356813 | 1.60788E-06 | 5.27353E-06 |
| TSFM      | 0.249232941  | 1.62775E-06 | 5.33782E-06 |
| DCLK2     | -0.249187332 | 1.63512E-06 | 5.36111E-06 |
| LAPTM4B   | 0.249174907  | 1.63713E-06 | 5.36684E-06 |
| C19orf25  | 0.24915138   | 1.64095E-06 | 5.37848E-06 |
| ALMS1     | -0.249148539 | 1.64142E-06 | 5.3791E-06  |
| CDC26     | 0.249060234  | 1.65584E-06 | 5.42547E-06 |
| GNL2      | 0.249025864  | 1.66148E-06 | 5.44307E-06 |
| MDH2      | 0.249018207  | 1.66274E-06 | 5.44631E-06 |
| PYCARD    | 0.249015467  | 1.6632E-06  | 5.44689E-06 |
| C5orf53   | -0.248985485 | 1.66814E-06 | 5.46218E-06 |
| AQP1      | -0.248964445 | 1.67162E-06 | 5.47267E-06 |
| ACBD3     | -0.248955473 | 1.6731E-06  | 5.47664E-06 |
| CSAD      | -0.248946564 | 1.67458E-06 | 5.48057E-06 |
| CIC       | -0.24892285  | 1.67852E-06 | 5.49255E-06 |
| MASPI     | -0.248893001 | 1.68348E-06 | 5.50789E-06 |
| MRPL15    | 0.248873472  | 1.68674E-06 | 5.51764E-06 |
| CDCA4     | 0.248822573  | 1.69526E-06 | 5.54459E-06 |
| COL18A1   | -0.248820035 | 1.69568E-06 | 5.54507E-06 |
| NCAM2     | -0.248768903 | 1.70428E-06 | 5.57228E-06 |
| ELN       | -0.248741365 | 1.70893E-06 | 5.58656E-06 |
| SNAP23    | -0.248736128 | 1.70981E-06 | 5.58854E-06 |
| C12orf65  | 0.248719153  | 1.71269E-06 | 5.59701E-06 |
| ZNF493    | -0.248717411 | 1.71298E-06 | 5.59705E-06 |
| SEC31B    | -0.248676782 | 1.71988E-06 | 5.61866E-06 |
| BMPRI1A   | -0.248658569 | 1.72298E-06 | 5.62787E-06 |
| SHC4      | -0.248602716 | 1.73252E-06 | 5.6581E-06  |
| C9orf169  | 0.248553108  | 1.74103E-06 | 5.68498E-06 |
| ASB3      | -0.248487138 | 1.75242E-06 | 5.72122E-06 |
| EXOC1     | -0.248475324 | 1.75447E-06 | 5.72696E-06 |
| RBM17     | 0.248469258  | 1.75552E-06 | 5.72946E-06 |
| ZNF347    | -0.248464796 | 1.75629E-06 | 5.73104E-06 |
| FHL5      | -0.248459739 | 1.75717E-06 | 5.73297E-06 |
| RAB5B     | -0.248432524 | 1.7619E-06  | 5.74746E-06 |
| NCRNA0018 | -0.248342402 | 1.77765E-06 | 5.79789E-06 |
| KDSR      | -0.248312649 | 1.78288E-06 | 5.814E-06   |
| AKR7A2    | 0.248300133  | 1.78509E-06 | 5.82023E-06 |
| EFCAB4B   | -0.248280262 | 1.78859E-06 | 5.83071E-06 |
| POLR3F    | 0.248240361  | 1.79565E-06 | 5.85276E-06 |
| ZNF765    | -0.24813253  | 1.81486E-06 | 5.91439E-06 |
| LYZL2     | 0.248129026  | 1.81548E-06 | 5.91547E-06 |
| NDUFA4L2  | 0.248104557  | 1.81987E-06 | 5.9288E-06  |
| LACTB     | -0.248077501 | 1.82473E-06 | 5.94367E-06 |
| MTMR15    | -0.24804686  | 1.83026E-06 | 5.96068E-06 |
| TTC22     | -0.248038822 | 1.83171E-06 | 5.96443E-06 |

|           |              |             |             |
|-----------|--------------|-------------|-------------|
| KIF5B     | -0.247975326 | 1.84321E-06 | 6.00091E-06 |
| UNC5B     | -0.247954269 | 1.84704E-06 | 6.0124E-06  |
| SH3PXD2B  | -0.247945884 | 1.84857E-06 | 6.01595E-06 |
| MAP3K1    | -0.247944955 | 1.84874E-06 | 6.01595E-06 |
| ZNF131    | -0.247921575 | 1.853E-06   | 6.02885E-06 |
| CNTD1     | 0.247917614  | 1.85373E-06 | 6.03021E-06 |
| FLYWCH2   | 0.247905457  | 1.85595E-06 | 6.03646E-06 |
| HERC6     | -0.247877739 | 1.86103E-06 | 6.05198E-06 |
| NAT2      | -0.247793338 | 1.87657E-06 | 6.10151E-06 |
| UBR7      | -0.247791706 | 1.87687E-06 | 6.10151E-06 |
| KGFLP2    | -0.247777478 | 1.8795E-06  | 6.10907E-06 |
| UBE2D3    | -0.247710956 | 1.89185E-06 | 6.14822E-06 |
| WSCD2     | -0.247703565 | 1.89323E-06 | 6.15169E-06 |
| C8orf80   | -0.247685578 | 1.89659E-06 | 6.16159E-06 |
| PSMD7     | 0.247656989  | 1.90193E-06 | 6.17795E-06 |
| C1QBP     | 0.247635291  | 1.906E-06   | 6.19015E-06 |
| FAM102B   | -0.247607132 | 1.91129E-06 | 6.20632E-06 |
| LOC100133 | 0.247602657  | 1.91213E-06 | 6.20804E-06 |
| SLC25A11  | 0.247580099  | 1.91638E-06 | 6.22083E-06 |
| STIM1     | -0.247553103 | 1.92148E-06 | 6.23636E-06 |
| TMCO7     | -0.247500672 | 1.93142E-06 | 6.2676E-06  |
| GJB2      | -0.247418952 | 1.94701E-06 | 6.31715E-06 |
| VRK1      | 0.247399939  | 1.95065E-06 | 6.32794E-06 |
| ZNF165    | 0.247380713  | 1.95434E-06 | 6.33889E-06 |
| DYNLT1    | 0.247366935  | 1.95699E-06 | 6.34645E-06 |
| ARMCX5    | -0.247361266 | 1.95809E-06 | 6.34895E-06 |
| GAMT      | 0.247329677  | 1.96418E-06 | 6.36767E-06 |
| COL6A1    | -0.24731141  | 1.96771E-06 | 6.37807E-06 |
| RAC3      | 0.24717705   | 1.99386E-06 | 6.4618E-06  |
| C8ORFK29  | 0.247117068  | 2.00565E-06 | 6.49893E-06 |
| FCN3      | -0.247058868 | 2.01714E-06 | 6.53512E-06 |
| S100A4    | 0.247048332  | 2.01923E-06 | 6.5401E-06  |
| NCRNA0008 | 0.247047802  | 2.01934E-06 | 6.5401E-06  |
| ABCF3     | 0.247045391  | 2.01981E-06 | 6.54058E-06 |
| C11orf80  | 0.247035081  | 2.02186E-06 | 6.54614E-06 |
| FAM82A2   | -0.247024303 | 2.024E-06   | 6.55201E-06 |
| MTERFD1   | 0.246998584  | 2.02912E-06 | 6.56751E-06 |
| RGS6      | -0.24685799  | 2.05731E-06 | 6.65768E-06 |
| LOC100134 | 0.246846526  | 2.05963E-06 | 6.66409E-06 |
| XRRA1     | 0.2467421    | 2.08083E-06 | 6.7316E-06  |
| CLDND2    | 0.246732962  | 2.0827E-06  | 6.73655E-06 |
| TLK1      | -0.246707206 | 2.08796E-06 | 6.75248E-06 |
| HGF       | -0.246703535 | 2.08872E-06 | 6.75382E-06 |
| TRHDE     | -0.246701002 | 2.08923E-06 | 6.7544E-06  |
| DNAJC24   | -0.24669345  | 2.09078E-06 | 6.7583E-06  |
| TMEM39B   | 0.246602187  | 2.10957E-06 | 6.81793E-06 |

|           |              |             |             |
|-----------|--------------|-------------|-------------|
| RGS22     | -0.246538576 | 2.12276E-06 | 6.85945E-06 |
| SCAI      | -0.246502585 | 2.13026E-06 | 6.88256E-06 |
| ANGPTL2   | -0.246468111 | 2.13747E-06 | 6.90473E-06 |
| SGSM3     | 0.246453908  | 2.14044E-06 | 6.91322E-06 |
| ESPNP     | -0.246444689 | 2.14238E-06 | 6.91834E-06 |
| CASK      | -0.246431328 | 2.14518E-06 | 6.92628E-06 |
| SEPN1     | -0.246421814 | 2.14718E-06 | 6.93161E-06 |
| LQK1      | 0.246410136  | 2.14964E-06 | 6.93842E-06 |
| FIZ1      | 0.246385156  | 2.1549E-06  | 6.95428E-06 |
| PPARG     | 0.246359937  | 2.16023E-06 | 6.97035E-06 |
| APEH      | 0.246347767  | 2.16281E-06 | 6.97753E-06 |
| PRRT3     | 0.246307915  | 2.17126E-06 | 7.00367E-06 |
| CDK10     | 0.246259857  | 2.1815E-06  | 7.03555E-06 |
| SLC23A2   | -0.246245821 | 2.1845E-06  | 7.04408E-06 |
| HSN2      | -0.246205402 | 2.19315E-06 | 7.07085E-06 |
| ZNF789    | 0.246200026  | 2.19431E-06 | 7.07342E-06 |
| HLTF      | -0.246191609 | 2.19611E-06 | 7.0781E-06  |
| NAV3      | -0.246162657 | 2.20234E-06 | 7.09703E-06 |
| MARCKSL1  | 0.246148555  | 2.20538E-06 | 7.10568E-06 |
| SMARCB1   | 0.246121917  | 2.21114E-06 | 7.12192E-06 |
| SOD1      | 0.246121902  | 2.21114E-06 | 7.12192E-06 |
| SIRT4     | 0.246049492  | 2.22685E-06 | 7.17137E-06 |
| LOC388152 | 0.24600986   | 2.2355E-06  | 7.19805E-06 |
| ATG4A     | -0.245968997 | 2.24445E-06 | 7.22569E-06 |
| GPBPIL1   | -0.245908593 | 2.25773E-06 | 7.26723E-06 |
| RPLP0P2   | 0.245906617  | 2.25817E-06 | 7.26723E-06 |
| PDE5A     | -0.245904869 | 2.25856E-06 | 7.26723E-06 |
| MON1B     | -0.245903732 | 2.25881E-06 | 7.26723E-06 |
| AXL       | -0.24587781  | 2.26454E-06 | 7.28448E-06 |
| PRDM6     | -0.245861139 | 2.26823E-06 | 7.29518E-06 |
| EXOC3L2   | -0.245854319 | 2.26974E-06 | 7.29886E-06 |
| NCOA7     | -0.245831334 | 2.27484E-06 | 7.31409E-06 |
| ASPN      | -0.245829326 | 2.27529E-06 | 7.31434E-06 |
| ZNF284    | -0.245813724 | 2.27876E-06 | 7.32432E-06 |
| PDSS2     | -0.245797823 | 2.2823E-06  | 7.33452E-06 |
| CRISP2    | 0.245779001  | 2.2865E-06  | 7.34683E-06 |
| USP31     | -0.245768636 | 2.28882E-06 | 7.35308E-06 |
| CHAF1B    | 0.245747304  | 2.29359E-06 | 7.36723E-06 |
| VAMP4     | -0.245692423 | 2.30591E-06 | 7.40562E-06 |
| CCDC97    | 0.245675141  | 2.30981E-06 | 7.41693E-06 |
| ITK       | -0.245670665 | 2.31081E-06 | 7.41897E-06 |
| GPRASP2   | -0.245662998 | 2.31255E-06 | 7.42333E-06 |
| HHIP      | -0.245657324 | 2.31383E-06 | 7.42625E-06 |
| C19orf45  | 0.245607981  | 2.325E-06   | 7.46089E-06 |
| KHNYN     | -0.245497243 | 2.35025E-06 | 7.54073E-06 |
| BHLHE41   | -0.245420546 | 2.3679E-06  | 7.59612E-06 |

|           |              |             |             |
|-----------|--------------|-------------|-------------|
| ODF2L     | -0.245415794 | 2.369E-06   | 7.59842E-06 |
| TK2       | -0.245376899 | 2.378E-06   | 7.62606E-06 |
| DDA1      | 0.245331671  | 2.38851E-06 | 7.65735E-06 |
| C20orf112 | -0.245331602 | 2.38852E-06 | 7.65735E-06 |
| TMEM14A   | 0.245252483  | 2.40701E-06 | 7.71536E-06 |
| SMS       | 0.245250859  | 2.40739E-06 | 7.71536E-06 |
| DLEU1     | 0.245221555  | 2.41428E-06 | 7.73618E-06 |
| SLC7A6OS  | -0.245188341 | 2.4221E-06  | 7.76E-06    |
| PAIP2     | 0.245183348  | 2.42328E-06 | 7.76253E-06 |
| RNF115    | -0.245159481 | 2.42892E-06 | 7.77934E-06 |
| HIST1H3D  | 0.245148059  | 2.43162E-06 | 7.78568E-06 |
| FAM185A   | -0.245147818 | 2.43168E-06 | 7.78568E-06 |
| PHF20     | -0.245027191 | 2.46041E-06 | 7.87641E-06 |
| HINFP     | 0.245021274  | 2.46183E-06 | 7.87968E-06 |
| GIYD2     | 0.244972226  | 2.47361E-06 | 7.91611E-06 |
| THRSP     | -0.244969043 | 2.47438E-06 | 7.9173E-06  |
| STAG3L4   | 0.244960793  | 2.47637E-06 | 7.92238E-06 |
| NPTXR     | -0.244947959 | 2.47946E-06 | 7.93101E-06 |
| ZNF34     | 0.244939296  | 2.48155E-06 | 7.93642E-06 |
| C2orf48   | 0.244934502  | 2.48271E-06 | 7.93885E-06 |
| RNF5P1    | 0.244877413  | 2.49654E-06 | 7.98179E-06 |
| NUDCD1    | 0.24484046   | 2.50553E-06 | 8.00925E-06 |
| ADAMTS3   | -0.244813748 | 2.51205E-06 | 8.0288E-06  |
| LAX1      | -0.24479955  | 2.51552E-06 | 8.0386E-06  |
| FAM190A   | -0.244794595 | 2.51673E-06 | 8.04119E-06 |
| ZNF597    | -0.244786798 | 2.51864E-06 | 8.046E-06   |
| ABCA6     | -0.244771644 | 2.52236E-06 | 8.0557E-06  |
| CLK1      | -0.244771105 | 2.52249E-06 | 8.0557E-06  |
| TUBB4     | 0.244755918  | 2.52622E-06 | 8.06631E-06 |
| TGFB3     | -0.244693386 | 2.54162E-06 | 8.1142E-06  |
| SAR1A     | 0.244685617  | 2.54354E-06 | 8.11903E-06 |
| NDRG2     | -0.24466174  | 2.54945E-06 | 8.13659E-06 |
| IFT140    | -0.244659752 | 2.54994E-06 | 8.13686E-06 |
| FAM104A   | 0.244643354  | 2.55401E-06 | 8.14853E-06 |
| GABBR1    | -0.244634954 | 2.5561E-06  | 8.15388E-06 |
| SLC22A25  | -0.24461416  | 2.56127E-06 | 8.16907E-06 |
| ELOVL5    | -0.244601258 | 2.56448E-06 | 8.178E-06   |
| C3orf37   | 0.244556949  | 2.57555E-06 | 8.21197E-06 |
| CACHD1    | -0.244506486 | 2.5882E-06  | 8.25101E-06 |
| LRRC15    | -0.244464196 | 2.59885E-06 | 8.28364E-06 |
| CREB3     | 0.244441806  | 2.60451E-06 | 8.30034E-06 |
| CLEC4M    | -0.244430205 | 2.60745E-06 | 8.30837E-06 |
| PLA2G4A   | -0.244363912 | 2.62428E-06 | 8.36068E-06 |
| CXorf40A  | 0.24434916   | 2.62804E-06 | 8.37091E-06 |
| UBE2E1    | 0.244348014  | 2.62834E-06 | 8.37091E-06 |
| KIAA1191  | -0.244311051 | 2.63778E-06 | 8.39966E-06 |



|           |              |             |             |
|-----------|--------------|-------------|-------------|
| MRM1      | 0.244200513  | 2.66623E-06 | 8.48887E-06 |
| NINJ2     | 0.244184662  | 2.67033E-06 | 8.50058E-06 |
| GPR21     | -0.244174874 | 2.67287E-06 | 8.50729E-06 |
| POLR3A    | -0.244172117 | 2.67358E-06 | 8.50821E-06 |
| TMEM79    | 0.244157904  | 2.67727E-06 | 8.51749E-06 |
| CYP46A1   | -0.244157583 | 2.67735E-06 | 8.51749E-06 |
| PEX12     | -0.244134013 | 2.68348E-06 | 8.53561E-06 |
| POLG2     | 0.24411555   | 2.68829E-06 | 8.54955E-06 |
| FNBPIL    | -0.244026004 | 2.71173E-06 | 8.62272E-06 |
| PKHD1     | -0.244013425 | 2.71504E-06 | 8.63186E-06 |
| ODZ4      | -0.243921601 | 2.7393E-06  | 8.70762E-06 |
| SMC5      | -0.243899951 | 2.74506E-06 | 8.72334E-06 |
| SFRS13B   | 0.243899689  | 2.74513E-06 | 8.72334E-06 |
| DCAF8     | -0.243873456 | 2.75211E-06 | 8.74283E-06 |
| IGDCC3    | 0.243873359  | 2.75214E-06 | 8.74283E-06 |
| NCRNA0009 | 0.243852474  | 2.75771E-06 | 8.75914E-06 |
| AADAT     | -0.243837991 | 2.76158E-06 | 8.77004E-06 |
| DAB2IP    | -0.243810268 | 2.76901E-06 | 8.79221E-06 |
| CPLX2     | 0.243798943  | 2.77204E-06 | 8.79952E-06 |
| SELP      | -0.243798392 | 2.77219E-06 | 8.79952E-06 |
| TTYH2     | -0.243773338 | 2.77893E-06 | 8.81949E-06 |
| GGH       | 0.243741386  | 2.78754E-06 | 8.84541E-06 |
| RUNX2     | -0.243724101 | 2.7922E-06  | 8.85881E-06 |
| PGRMC1    | -0.243681284 | 2.8038E-06  | 8.89369E-06 |
| APPL2     | -0.243680213 | 2.80409E-06 | 8.89369E-06 |
| DNAJB5    | -0.24367113  | 2.80656E-06 | 8.9001E-06  |
| MYO5B     | -0.243640437 | 2.81491E-06 | 8.92515E-06 |
| HDHD2     | -0.243609259 | 2.82341E-06 | 8.95069E-06 |
| PLCXD2    | -0.243603342 | 2.82503E-06 | 8.95439E-06 |
| C11orf95  | -0.243577765 | 2.83203E-06 | 8.97515E-06 |
| ZDHHC15   | -0.243573649 | 2.83316E-06 | 8.9773E-06  |
| ADD1      | -0.243525529 | 2.84638E-06 | 9.01775E-06 |
| COL10A1   | -0.243520621 | 2.84773E-06 | 9.0206E-06  |
| C9orf128  | -0.243503308 | 2.8525E-06  | 9.03428E-06 |
| NDRG1     | 0.243457342  | 2.86521E-06 | 9.07308E-06 |
| AKNA      | -0.243436887 | 2.87088E-06 | 9.0896E-06  |
| FAM171B   | -0.243426274 | 2.87383E-06 | 9.09748E-06 |
| MPV17L2   | 0.243407641  | 2.87901E-06 | 9.11244E-06 |
| AVP       | 0.243397558  | 2.88182E-06 | 9.11988E-06 |
| SYNM      | -0.243374204 | 2.88833E-06 | 9.13904E-06 |
| KCTD1     | -0.243365489 | 2.89076E-06 | 9.14528E-06 |
| SLFN14    | -0.243324619 | 2.90221E-06 | 9.18002E-06 |
| CCR8      | -0.243293922 | 2.91083E-06 | 9.2055E-06  |
| ARL10     | -0.243292651 | 2.91118E-06 | 9.2055E-06  |
| LOC100128 | 0.243287524  | 2.91263E-06 | 9.2086E-06  |
| CCDC113   | -0.243271625 | 2.9171E-06  | 9.22129E-06 |

|           |              |             |             |
|-----------|--------------|-------------|-------------|
| AGAP5     | -0.243244234 | 2.92484E-06 | 9.24426E-06 |
| IGFALS    | -0.243234141 | 2.92769E-06 | 9.25181E-06 |
| LOC220729 | -0.243180177 | 2.94299E-06 | 9.29869E-06 |
| LIPE      | -0.243162228 | 2.94809E-06 | 9.31334E-06 |
| COQ5      | 0.24313412   | 2.95611E-06 | 9.33717E-06 |
| PGAP2     | 0.243122042  | 2.95956E-06 | 9.34659E-06 |
| C16orf62  | -0.243098057 | 2.96642E-06 | 9.36677E-06 |
| C14orf181 | 0.243093557  | 2.96771E-06 | 9.36936E-06 |
| TRADD     | 0.2430634    | 2.97636E-06 | 9.39518E-06 |
| CARS2     | 0.242994226  | 2.9963E-06  | 9.45662E-06 |
| VASH1     | -0.242987552 | 2.99823E-06 | 9.46121E-06 |
| SALL1     | -0.242976489 | 3.00143E-06 | 9.46982E-06 |
| AVIL      | -0.242897368 | 3.02443E-06 | 9.54087E-06 |
| SEC16B    | -0.242877406 | 3.03026E-06 | 9.55775E-06 |
| TMEM132C  | -0.242850535 | 3.03812E-06 | 9.58103E-06 |
| E2F6      | 0.242834078  | 3.04295E-06 | 9.59473E-06 |
| CCDC80    | -0.242818351 | 3.04757E-06 | 9.60777E-06 |
| MAB21L2   | -0.242705496 | 3.08091E-06 | 9.71134E-06 |
| TIGD1     | 0.242683452  | 3.08746E-06 | 9.73045E-06 |
| KIF11     | 0.242676523  | 3.08952E-06 | 9.73541E-06 |
| KLF12     | -0.24267147  | 3.09103E-06 | 9.73861E-06 |
| SPPL3     | 0.242653351  | 3.09643E-06 | 9.75409E-06 |
| FOXA3     | 0.242616321  | 3.1075E-06  | 9.78741E-06 |
| PIK3C3    | -0.242592391 | 3.11467E-06 | 9.80844E-06 |
| PTPRU     | -0.242588606 | 3.1158E-06  | 9.81047E-06 |
| RNF208    | 0.24254034   | 3.13032E-06 | 9.85463E-06 |
| FAM70B    | -0.242477618 | 3.14929E-06 | 9.91277E-06 |
| ADAM33    | -0.242434196 | 3.16248E-06 | 9.95272E-06 |
| UBTD1     | 0.24240878   | 3.17023E-06 | 9.97553E-06 |
| CORO2B    | -0.242381967 | 3.17842E-06 | 9.99973E-06 |
| ERI1      | -0.242366473 | 3.18316E-06 | 1.00131E-05 |
| BHLHB9    | -0.242358097 | 3.18573E-06 | 1.00196E-05 |
| ZNF688    | 0.242352078  | 3.18758E-06 | 1.00238E-05 |
| HMGB2     | 0.242308292  | 3.20104E-06 | 1.00645E-05 |
| SCAMP1    | -0.242286604 | 3.20772E-06 | 1.00839E-05 |
| C4orf33   | -0.242280643 | 3.20956E-06 | 1.00881E-05 |
| ELP2P     | 0.242271247  | 3.21247E-06 | 1.00957E-05 |
| RAD52     | -0.242237566 | 3.22289E-06 | 1.01268E-05 |
| LOC127841 | 0.242223577  | 3.22723E-06 | 1.01389E-05 |
| PPM1K     | -0.242189397 | 3.23786E-06 | 1.01706E-05 |
| SLC24A5   | 0.242113802  | 3.26148E-06 | 1.02432E-05 |
| WDR75     | 0.242105647  | 3.26404E-06 | 1.02496E-05 |
| SLC25A15  | -0.242103721 | 3.26464E-06 | 1.02499E-05 |
| RFX3      | -0.242094773 | 3.26745E-06 | 1.02571E-05 |
| PCOTH     | 0.242072067  | 3.27459E-06 | 1.02779E-05 |
| RAG1      | -0.24202873  | 3.28826E-06 | 1.03192E-05 |

|           |              |             |             |
|-----------|--------------|-------------|-------------|
| NCRNA0017 | -0.241978952 | 3.30402E-06 | 1.0367E-05  |
| SNRNP40   | 0.241960787  | 3.30979E-06 | 1.03835E-05 |
| LASS4     | 0.241903105  | 3.32818E-06 | 1.04396E-05 |
| POLR1A    | -0.241892556 | 3.33156E-06 | 1.04485E-05 |
| GMFG      | 0.241879946  | 3.3356E-06  | 1.04595E-05 |
| PADI1     | -0.241860317 | 3.34189E-06 | 1.04776E-05 |
| FGF1      | -0.241794519 | 3.36307E-06 | 1.05423E-05 |
| BIVM      | -0.241776147 | 3.36901E-06 | 1.05593E-05 |
| SLCO3A1   | -0.241756139 | 3.37548E-06 | 1.05779E-05 |
| RNASE7    | -0.241723289 | 3.38614E-06 | 1.06097E-05 |
| KBTBD3    | 0.241708588  | 3.39092E-06 | 1.0623E-05  |
| KIAA0495  | -0.24169413  | 3.39563E-06 | 1.06361E-05 |
| LOC493754 | 0.24168938   | 3.39718E-06 | 1.06392E-05 |
| OR8A1     | 0.241663426  | 3.40565E-06 | 1.06629E-05 |
| TM4SF1    | 0.241662967  | 3.4058E-06  | 1.06629E-05 |
| NFKBIZ    | -0.241576075 | 3.43431E-06 | 1.07504E-05 |
| MTMR10    | -0.241528863 | 3.44989E-06 | 1.07975E-05 |
| TGIF2     | 0.241466855  | 3.47047E-06 | 1.08602E-05 |
| MCAM      | -0.241423159 | 3.48503E-06 | 1.09041E-05 |
| DEFB126   | 0.241404189  | 3.49138E-06 | 1.0921E-05  |
| STAB2     | -0.241403473 | 3.49162E-06 | 1.0921E-05  |
| RBP2      | 0.241402039  | 3.4921E-06  | 1.0921E-05  |
| SEC63     | -0.241386696 | 3.49723E-06 | 1.09354E-05 |
| CASP7     | -0.241333671 | 3.51505E-06 | 1.09894E-05 |
| FAM167A   | -0.241318878 | 3.52003E-06 | 1.10032E-05 |
| TTL9      | 0.241297845  | 3.52714E-06 | 1.10237E-05 |
| KIAA1467  | -0.241283721 | 3.53191E-06 | 1.10369E-05 |
| APOBEC3C  | -0.241239871 | 3.54678E-06 | 1.10816E-05 |
| SNCA      | -0.241234811 | 3.5485E-06  | 1.10852E-05 |
| TMED10    | -0.241228883 | 3.55051E-06 | 1.10898E-05 |
| RNF123    | -0.241221627 | 3.55298E-06 | 1.10957E-05 |
| BTNL9     | -0.241196151 | 3.56166E-06 | 1.11211E-05 |
| URGCP     | -0.241146657 | 3.57858E-06 | 1.11722E-05 |
| MRPS36    | 0.241137539  | 3.5817E-06  | 1.11802E-05 |
| UBXN2B    | -0.241124306 | 3.58624E-06 | 1.11926E-05 |
| DPYSL3    | -0.241110692 | 3.59092E-06 | 1.12054E-05 |
| UBE2Z     | 0.24110603   | 3.59252E-06 | 1.12087E-05 |
| GZF1      | -0.241095416 | 3.59617E-06 | 1.12183E-05 |
| NHEJ1     | 0.241091108  | 3.59765E-06 | 1.12212E-05 |
| ACER3     | -0.241067293 | 3.60586E-06 | 1.1245E-05  |
| CAPZB     | 0.24105021   | 3.61176E-06 | 1.12617E-05 |
| HTR2A     | -0.241045331 | 3.61345E-06 | 1.12652E-05 |
| RTN4RL1   | -0.24099546  | 3.63073E-06 | 1.13173E-05 |
| TMEM209   | -0.240886992 | 3.6686E-06  | 1.14335E-05 |
| NDUFA10   | 0.240843163  | 3.68401E-06 | 1.14797E-05 |
| CPSF1     | 0.240839356  | 3.68535E-06 | 1.14821E-05 |

|           |              |             |             |
|-----------|--------------|-------------|-------------|
| FAM110A   | 0.240807493  | 3.69659E-06 | 1.15153E-05 |
| SNORD1C   | -0.240799889 | 3.69928E-06 | 1.15219E-05 |
| BCAT2     | 0.240778733  | 3.70677E-06 | 1.15423E-05 |
| TRIM32    | -0.240778145 | 3.70698E-06 | 1.15423E-05 |
| MED21     | -0.240722143 | 3.72687E-06 | 1.16024E-05 |
| HIST1H1E  | 0.240652667  | 3.75169E-06 | 1.16779E-05 |
| NEDD1     | -0.240629397 | 3.76004E-06 | 1.1702E-05  |
| FAM83H    | 0.24039149   | 3.84642E-06 | 1.1969E-05  |
| KCND1     | -0.240383071 | 3.84951E-06 | 1.19767E-05 |
| CKMT1A    | 0.240338238  | 3.86601E-06 | 1.20262E-05 |
| RAB4B     | 0.240318365  | 3.87335E-06 | 1.20471E-05 |
| CRELD2    | 0.240287337  | 3.88483E-06 | 1.2081E-05  |
| BCAR3     | -0.240231431 | 3.9056E-06  | 1.21436E-05 |
| DPH2      | 0.240206438  | 3.91492E-06 | 1.21707E-05 |
| COL13A1   | -0.240199452 | 3.91753E-06 | 1.21769E-05 |
| AGGF1     | -0.24004883  | 3.97417E-06 | 1.23511E-05 |
| SYTL4     | -0.240006336 | 3.99029E-06 | 1.23992E-05 |
| GYS2      | -0.239974121 | 4.00256E-06 | 1.24354E-05 |
| CACNA1D   | -0.239950773 | 4.01147E-06 | 1.24611E-05 |
| EPN1      | 0.239944564  | 4.01384E-06 | 1.24666E-05 |
| ADSS      | -0.239896389 | 4.0323E-06  | 1.25219E-05 |
| MCM9      | -0.239862294 | 4.04541E-06 | 1.25607E-05 |
| SPIRE1    | -0.239733933 | 4.09514E-06 | 1.27131E-05 |
| CDCA2     | 0.239691284  | 4.11179E-06 | 1.27628E-05 |
| LAMC3     | -0.239686981 | 4.11347E-06 | 1.27661E-05 |
| KIAA0652  | 0.239663092  | 4.12283E-06 | 1.27914E-05 |
| FAT3      | -0.239661733 | 4.12336E-06 | 1.27914E-05 |
| THPO      | 0.23966123   | 4.12356E-06 | 1.27914E-05 |
| ALG5      | 0.239659553  | 4.12422E-06 | 1.27914E-05 |
| PGM5      | -0.239657732 | 4.12493E-06 | 1.27917E-05 |
| TRIM31    | 0.239644388  | 4.13017E-06 | 1.28059E-05 |
| HIST1H2AB | 0.239639277  | 4.13218E-06 | 1.28101E-05 |
| NSUN6     | -0.239591342 | 4.15106E-06 | 1.28667E-05 |
| FAM129B   | -0.239565603 | 4.16123E-06 | 1.28962E-05 |
| DPH3      | 0.239551136  | 4.16696E-06 | 1.29119E-05 |
| TESK2     | -0.23952108  | 4.17888E-06 | 1.29469E-05 |
| ZNF174    | 0.239436791  | 4.21249E-06 | 1.3049E-05  |
| TRPC5     | -0.239415214 | 4.22114E-06 | 1.30737E-05 |
| ZNF843    | -0.239348864 | 4.24783E-06 | 1.31543E-05 |
| FAM46A    | -0.239337811 | 4.25229E-06 | 1.31661E-05 |
| SNRNP200  | -0.239304051 | 4.26595E-06 | 1.32063E-05 |
| PRSS45    | 0.239237143  | 4.29314E-06 | 1.32885E-05 |
| AAK1      | -0.239214962 | 4.30219E-06 | 1.33144E-05 |
| RABEPK    | 0.239198911  | 4.30875E-06 | 1.33326E-05 |
| CTSA      | 0.239130238  | 4.33693E-06 | 1.34177E-05 |
| WDR26     | -0.239084001 | 4.356E-06   | 1.34735E-05 |

|          |              |             |             |
|----------|--------------|-------------|-------------|
| C1S      | -0.239081703 | 4.35695E-06 | 1.34735E-05 |
| TTC30A   | -0.239081607 | 4.35699E-06 | 1.34735E-05 |
| YKT6     | 0.239045386  | 4.37199E-06 | 1.35178E-05 |
| SLC26A2  | -0.239018364 | 4.38321E-06 | 1.35501E-05 |
| ASB1     | 0.239016989  | 4.38378E-06 | 1.35501E-05 |
| CYR61    | -0.238996875 | 4.39215E-06 | 1.35738E-05 |
| HSD17B12 | -0.238960789 | 4.40721E-06 | 1.36182E-05 |
| RBMX     | 0.238958465  | 4.40818E-06 | 1.36191E-05 |
| IKZF5    | -0.238931698 | 4.41938E-06 | 1.36516E-05 |
| UBE2W    | -0.238919972 | 4.4243E-06  | 1.36647E-05 |
| SNX30    | -0.23889727  | 4.43383E-06 | 1.3692E-05  |
| MPV17    | 0.23886674   | 4.44668E-06 | 1.37296E-05 |
| KCNK17   | -0.238852035 | 4.45289E-06 | 1.37466E-05 |
| CCRL1    | -0.2388468   | 4.4551E-06  | 1.37513E-05 |
| PLEKHA3  | -0.23883623  | 4.45956E-06 | 1.37629E-05 |
| SLC11A2  | -0.238766149 | 4.48928E-06 | 1.38525E-05 |
| AK2      | 0.238750466  | 4.49595E-06 | 1.38709E-05 |
| ZBTB47   | -0.238732342 | 4.50368E-06 | 1.38926E-05 |
| NEAT1    | -0.23870549  | 4.51515E-06 | 1.39258E-05 |
| C5orf4   | -0.238685469 | 4.52372E-06 | 1.39501E-05 |
| TTLL7    | -0.238644576 | 4.54127E-06 | 1.40021E-05 |
| OLFML1   | -0.238641444 | 4.54262E-06 | 1.40041E-05 |
| RERG     | -0.238616331 | 4.55344E-06 | 1.40352E-05 |
| C22orf36 | 0.238581285  | 4.56857E-06 | 1.40797E-05 |
| FOXN2    | -0.238534183 | 4.58899E-06 | 1.41404E-05 |
| LGALS2   | 0.238527127  | 4.59205E-06 | 1.41477E-05 |
| SLC26A11 | 0.238497937  | 4.60476E-06 | 1.41846E-05 |
| SBDSP1   | -0.238491888 | 4.60739E-06 | 1.41906E-05 |
| GHDC     | 0.23848286   | 4.61133E-06 | 1.42005E-05 |
| YARS     | 0.238375819  | 4.65827E-06 | 1.43428E-05 |
| SELM     | 0.238358117  | 4.66608E-06 | 1.43647E-05 |
| HNF4G    | -0.238210823 | 4.73152E-06 | 1.45639E-05 |
| CD1D     | -0.238090273 | 4.78572E-06 | 1.47284E-05 |
| SMAD4    | -0.238072269 | 4.79387E-06 | 1.47512E-05 |
| KIAA1586 | 0.238052994  | 4.80261E-06 | 1.47758E-05 |
| NFKBIA   | -0.238040805 | 4.80814E-06 | 1.47906E-05 |
| C7orf13  | 0.237927787  | 4.85973E-06 | 1.49469E-05 |
| KCNE1L   | 0.237868921  | 4.8868E-06  | 1.50279E-05 |
| DGCR6L   | 0.237852579  | 4.89435E-06 | 1.50488E-05 |
| DHRS11   | 0.237838717  | 4.90075E-06 | 1.50662E-05 |
| NT5DC2   | 0.237767735  | 4.93369E-06 | 1.51651E-05 |
| MARK2    | -0.23776136  | 4.93665E-06 | 1.51718E-05 |
| S100A13  | 0.237758387  | 4.93804E-06 | 1.51737E-05 |
| BCL6B    | -0.237730004 | 4.95128E-06 | 1.52121E-05 |
| GBP4     | -0.237686859 | 4.97147E-06 | 1.52718E-05 |
| OAS2     | -0.237671609 | 4.97862E-06 | 1.52914E-05 |

|           |              |             |             |
|-----------|--------------|-------------|-------------|
| EMCN      | -0.23763746  | 4.99468E-06 | 1.53383E-05 |
| C20orf177 | -0.237615135 | 5.0052E-06  | 1.53683E-05 |
| C1orf43   | 0.237610758  | 5.00727E-06 | 1.53722E-05 |
| NOL10     | 0.237560787  | 5.03091E-06 | 1.54424E-05 |
| BSDC1     | -0.237522474 | 5.04911E-06 | 1.54959E-05 |
| UHRF2     | -0.237485982 | 5.0665E-06  | 1.55469E-05 |
| RYK       | -0.237468284 | 5.07496E-06 | 1.55704E-05 |
| KCNMA1    | -0.237458151 | 5.0798E-06  | 1.55829E-05 |
| CIB2      | 0.237452459  | 5.08253E-06 | 1.55889E-05 |
| ZNF608    | -0.237449223 | 5.08408E-06 | 1.55912E-05 |
| PTPLAD2   | -0.23739514  | 5.11004E-06 | 1.56684E-05 |
| ZNF546    | -0.237387419 | 5.11376E-06 | 1.56774E-05 |
| NAA15     | -0.237355016 | 5.12939E-06 | 1.57229E-05 |
| ZBTB49    | -0.237342651 | 5.13537E-06 | 1.57388E-05 |
| LY6G6C    | 0.237331105  | 5.14095E-06 | 1.57535E-05 |
| C18orf2   | 0.237286634  | 5.16252E-06 | 1.58172E-05 |
| IGFBP7    | -0.237272227 | 5.16953E-06 | 1.58362E-05 |
| TAF3      | -0.237263733 | 5.17366E-06 | 1.58464E-05 |
| HPDL      | 0.237215305  | 5.1973E-06  | 1.59164E-05 |
| C20orf46  | 0.237210949  | 5.19943E-06 | 1.59202E-05 |
| ETAA1     | -0.237209517 | 5.20013E-06 | 1.59202E-05 |
| RAD23B    | -0.237148065 | 5.23029E-06 | 1.601E-05   |
| PTX3      | -0.237025118 | 5.29112E-06 | 1.61937E-05 |
| IRF8      | -0.237004149 | 5.30157E-06 | 1.62232E-05 |
| ISM2      | 0.236948379  | 5.32944E-06 | 1.63039E-05 |
| C4orf32   | -0.23694813  | 5.32956E-06 | 1.63039E-05 |
| PTDSS1    | 0.236924313  | 5.34151E-06 | 1.63379E-05 |
| BMP5      | -0.236898092 | 5.35469E-06 | 1.63757E-05 |
| ACOT7     | 0.236866354  | 5.37068E-06 | 1.64221E-05 |
| C8orf45   | 0.236864662  | 5.37153E-06 | 1.64222E-05 |
| SELS      | 0.236836236  | 5.3859E-06  | 1.64636E-05 |
| ZNF544    | 0.236828082  | 5.39003E-06 | 1.64737E-05 |
| TAF15     | 0.236819933  | 5.39416E-06 | 1.64838E-05 |
| HSD11B1   | -0.236807951 | 5.40023E-06 | 1.64998E-05 |
| CDC48     | 0.236794426  | 5.4071E-06  | 1.65182E-05 |
| GPR179    | -0.236738015 | 5.43582E-06 | 1.66034E-05 |
| CTAG1B    | 0.236712265  | 5.44898E-06 | 1.66411E-05 |
| PAPD7     | -0.236698937 | 5.45581E-06 | 1.66594E-05 |
| MYO1A     | 0.236691322  | 5.45971E-06 | 1.66687E-05 |
| PTRF      | -0.23667352  | 5.46884E-06 | 1.66941E-05 |
| C16orf68  | 0.236635267  | 5.48852E-06 | 1.67495E-05 |
| SLC28A3   | -0.236634946 | 5.48868E-06 | 1.67495E-05 |
| KCNN2     | -0.236532143 | 5.5419E-06  | 1.69093E-05 |
| PRDX4     | 0.236522932  | 5.54669E-06 | 1.69213E-05 |
| TNNC2     | 0.236520167  | 5.54813E-06 | 1.69231E-05 |
| THAP2     | -0.236505141 | 5.55595E-06 | 1.69444E-05 |

|          |              |             |             |
|----------|--------------|-------------|-------------|
| TRIB2    | -0.236492279 | 5.56266E-06 | 1.69608E-05 |
| FAM192A  | 0.23649154   | 5.56305E-06 | 1.69608E-05 |
| EPHB1    | -0.236414541 | 5.60337E-06 | 1.70811E-05 |
| SLC9A1   | -0.236369144 | 5.62728E-06 | 1.71514E-05 |
| NRF1     | 0.236313371  | 5.65678E-06 | 1.72387E-05 |
| C10orf35 | 0.236287817  | 5.67034E-06 | 1.72774E-05 |
| RCE1     | 0.236222316  | 5.70526E-06 | 1.73811E-05 |
| XAF1     | -0.236204898 | 5.71458E-06 | 1.74068E-05 |
| DOCK11   | -0.236157916 | 5.73978E-06 | 1.74809E-05 |
| GAGE12J  | 0.236123038  | 5.75857E-06 | 1.75345E-05 |
| MED29    | 0.236121995  | 5.75913E-06 | 1.75345E-05 |
| TMEFF1   | -0.236110598 | 5.76528E-06 | 1.75505E-05 |
| AHI1     | -0.236097371 | 5.77243E-06 | 1.75696E-05 |
| NPAS1    | 0.236077273  | 5.7833E-06  | 1.76E-05    |
| SLC25A28 | 0.236056707  | 5.79445E-06 | 1.76312E-05 |
| SLC7A10  | 0.235993231  | 5.82899E-06 | 1.77336E-05 |
| DGCR6    | 0.235930139  | 5.86351E-06 | 1.78359E-05 |
| BTBD1    | -0.235819576 | 5.92448E-06 | 1.80186E-05 |
| MAGIX    | 0.235781243  | 5.94576E-06 | 1.80806E-05 |
| TINAGL1  | -0.235773956 | 5.94981E-06 | 1.80901E-05 |
| COPB2    | -0.235763558 | 5.9556E-06  | 1.8105E-05  |
| NFIA     | -0.235708021 | 5.9866E-06  | 1.81965E-05 |
| THSD1    | -0.235704931 | 5.98833E-06 | 1.81989E-05 |
| MYLIP    | -0.235654132 | 6.01684E-06 | 1.82828E-05 |
| LOC90246 | -0.235648906 | 6.01978E-06 | 1.82889E-05 |
| CAGE1    | 0.235629674  | 6.03061E-06 | 1.83165E-05 |
| GSK3A    | 0.235629499  | 6.03071E-06 | 1.83165E-05 |
| MAVS     | 0.235591647  | 6.05208E-06 | 1.83786E-05 |
| AFARP1   | -0.235568273 | 6.06531E-06 | 1.8416E-05  |
| CDR2L    | -0.235517902 | 6.09392E-06 | 1.85001E-05 |
| ZNF844   | -0.235501872 | 6.10305E-06 | 1.8525E-05  |
| C9orf139 | -0.235477311 | 6.11707E-06 | 1.85647E-05 |
| C4orf19  | -0.235472928 | 6.11957E-06 | 1.85694E-05 |
| GIPC1    | 0.235417712  | 6.15121E-06 | 1.86626E-05 |
| FOXC1    | -0.235389444 | 6.16746E-06 | 1.87091E-05 |
| SENP3    | 0.235380717  | 6.17249E-06 | 1.87215E-05 |
| IARS2    | -0.235363442 | 6.18245E-06 | 1.87488E-05 |
| SULF1    | -0.235286734 | 6.22688E-06 | 1.88807E-05 |
| PCDP1    | -0.235279545 | 6.23105E-06 | 1.88905E-05 |
| CEP55    | 0.235248254  | 6.24927E-06 | 1.89428E-05 |
| CBX6     | -0.235234893 | 6.25707E-06 | 1.89636E-05 |
| CSNK1A1L | -0.235227503 | 6.26138E-06 | 1.89737E-05 |
| RACGAP1  | 0.235187186  | 6.28498E-06 | 1.90423E-05 |
| TMCO2    | 0.23516413   | 6.29851E-06 | 1.90804E-05 |
| NUDT8    | 0.235103544  | 6.3342E-06  | 1.91856E-05 |
| AMOT     | -0.235052941 | 6.36415E-06 | 1.92734E-05 |

|           |              |             |             |
|-----------|--------------|-------------|-------------|
| PAPPA2    | -0.234963944 | 6.41716E-06 | 1.9431E-05  |
| PLEKHM1   | -0.234955963 | 6.42193E-06 | 1.94425E-05 |
| SCAF1     | 0.234896754  | 6.45746E-06 | 1.95471E-05 |
| NSUN5P2   | 0.23488299   | 6.46574E-06 | 1.95692E-05 |
| NDST3     | -0.234830901 | 6.49719E-06 | 1.96614E-05 |
| RALA      | 0.234730105  | 6.55845E-06 | 1.98438E-05 |
| CBWD2     | 0.234626155  | 6.62221E-06 | 2.00336E-05 |
| FAM119A   | 0.234607515  | 6.63371E-06 | 2.00653E-05 |
| ISG15     | 0.234557314  | 6.66476E-06 | 2.01562E-05 |
| FAM106A   | -0.234554665 | 6.6664E-06  | 2.01581E-05 |
| NALCN     | -0.234547068 | 6.67111E-06 | 2.01693E-05 |
| LOC400027 | -0.234507948 | 6.69543E-06 | 2.02398E-05 |
| TMEM218   | 0.234478755  | 6.71363E-06 | 2.02917E-05 |
| MGST2     | 0.234411745  | 6.75559E-06 | 2.04154E-05 |
| NCRNA0008 | -0.234389449 | 6.76961E-06 | 2.04547E-05 |
| GPR155    | -0.234358853 | 6.78888E-06 | 2.05094E-05 |
| ATP13A4   | -0.234357431 | 6.78978E-06 | 2.05094E-05 |
| INADL     | -0.234355482 | 6.79101E-06 | 2.051E-05   |
| MFSD10    | 0.234334796  | 6.80408E-06 | 2.05464E-05 |
| CDC42SE1  | -0.23429448  | 6.82961E-06 | 2.06203E-05 |
| PRAMEF10  | -0.234209365 | 6.88383E-06 | 2.07809E-05 |
| MT3       | 0.234194468  | 6.89336E-06 | 2.08065E-05 |
| DTX4      | -0.23411782  | 6.9426E-06  | 2.09519E-05 |
| LOC342346 | -0.234046652 | 6.98861E-06 | 2.10876E-05 |
| HIST1H4B  | 0.234021747  | 7.00478E-06 | 2.1131E-05  |
| DDT       | 0.234021247  | 7.00511E-06 | 2.1131E-05  |
| EID2B     | 0.234004641  | 7.01591E-06 | 2.11604E-05 |
| ZNF117    | -0.233992663 | 7.02371E-06 | 2.11807E-05 |
| CALR3     | 0.233930934  | 7.06405E-06 | 2.12991E-05 |
| CENPQ     | 0.23387043   | 7.10381E-06 | 2.14157E-05 |
| DLL3      | 0.233831878  | 7.12925E-06 | 2.14892E-05 |
| JAM3      | -0.233800531 | 7.15E-06    | 2.15485E-05 |
| SEC22A    | 0.233742038  | 7.18887E-06 | 2.16623E-05 |
| CNOT7     | -0.233707478 | 7.21193E-06 | 2.17285E-05 |
| GDPD4     | -0.233692534 | 7.22193E-06 | 2.17554E-05 |
| TERT      | 0.233678544  | 7.23129E-06 | 2.17803E-05 |
| PTTG2     | 0.233670806  | 7.23648E-06 | 2.17926E-05 |
| NLRP12    | -0.233641033 | 7.25647E-06 | 2.18473E-05 |
| CXCR2     | -0.233640502 | 7.25683E-06 | 2.18473E-05 |
| MCM10     | 0.233631793  | 7.26268E-06 | 2.18616E-05 |
| COL1A1    | -0.233605731 | 7.28024E-06 | 2.19111E-05 |
| LOC441294 | -0.233580447 | 7.29731E-06 | 2.19592E-05 |
| KLF16     | 0.233513908  | 7.34241E-06 | 2.20916E-05 |
| SCD5      | -0.233508042 | 7.3464E-06  | 2.21002E-05 |
| HRASLS2   | 0.233471289  | 7.37144E-06 | 2.21722E-05 |
| LOC341056 | 0.23333524   | 7.46484E-06 | 2.24498E-05 |



|           |              |             |             |
|-----------|--------------|-------------|-------------|
| C9orf40   | 0.233260652  | 7.51653E-06 | 2.26018E-05 |
| RPS27     | 0.23323865   | 7.53184E-06 | 2.26444E-05 |
| MCM2      | 0.233227255  | 7.53978E-06 | 2.26649E-05 |
| MRE11A    | -0.233208668 | 7.55275E-06 | 2.27004E-05 |
| MOAP1     | -0.233204272 | 7.55582E-06 | 2.27062E-05 |
| ANXA1     | -0.233197244 | 7.56073E-06 | 2.27176E-05 |
| PTMS      | 0.23319115   | 7.56499E-06 | 2.27269E-05 |
| NAT6      | 0.233137177  | 7.60283E-06 | 2.28372E-05 |
| PDE11A    | -0.233122819 | 7.61293E-06 | 2.2864E-05  |
| TFDP2     | 0.233119903  | 7.61498E-06 | 2.28668E-05 |
| TINAG     | 0.233117482  | 7.61669E-06 | 2.28684E-05 |
| ANKRD31   | -0.233063163 | 7.65502E-06 | 2.29801E-05 |
| SEPX1     | 0.233040163  | 7.6713E-06  | 2.30255E-05 |
| ITGB8     | -0.232994296 | 7.70388E-06 | 2.31198E-05 |
| UBN1      | -0.23297416  | 7.71822E-06 | 2.31561E-05 |
| SCXB      | 0.232974051  | 7.7183E-06  | 2.31561E-05 |
| PCDH12    | -0.232969642 | 7.72145E-06 | 2.3161E-05  |
| FLG2      | -0.232968481 | 7.72227E-06 | 2.3161E-05  |
| SLC3A2    | 0.232961947  | 7.72694E-06 | 2.31715E-05 |
| CRYBB2    | 0.232910207  | 7.76395E-06 | 2.3279E-05  |
| C3orf49   | -0.232897899 | 7.77278E-06 | 2.33015E-05 |
| CDKN2D    | 0.232896475  | 7.7738E-06  | 2.33015E-05 |
| MECR      | 0.232891004  | 7.77773E-06 | 2.33098E-05 |
| ZNF45     | -0.232843754 | 7.81173E-06 | 2.34082E-05 |
| TFEC      | -0.232835615 | 7.8176E-06  | 2.34222E-05 |
| LOC399815 | 0.232808678  | 7.83707E-06 | 2.3477E-05  |
| C16orf55  | 0.232801355  | 7.84236E-06 | 2.34894E-05 |
| IQSEC2    | -0.232759695 | 7.87258E-06 | 2.35763E-05 |
| ZNF124    | -0.232735728 | 7.89001E-06 | 2.36249E-05 |
| NDST2     | -0.23269366  | 7.92069E-06 | 2.37133E-05 |
| EPB41L2   | -0.232672487 | 7.93618E-06 | 2.3756E-05  |
| C9orf89   | 0.232636105  | 7.96285E-06 | 2.38323E-05 |
| LIN7C     | -0.23261746  | 7.97656E-06 | 2.38697E-05 |
| AHCTF1    | -0.232586259 | 7.99954E-06 | 2.39349E-05 |
| RET       | -0.232560165 | 8.01881E-06 | 2.3989E-05  |
| KCTD21    | -0.232549137 | 8.02697E-06 | 2.40098E-05 |
| ECM1      | -0.232454213 | 8.09751E-06 | 2.42172E-05 |
| HAO2      | -0.232430552 | 8.11519E-06 | 2.42664E-05 |
| PODN      | -0.232415675 | 8.12632E-06 | 2.42954E-05 |
| SLC16A6   | -0.232414298 | 8.12735E-06 | 2.42954E-05 |
| GUCA2A    | 0.232406395  | 8.13327E-06 | 2.43095E-05 |
| DYRK3     | -0.232355621 | 8.17141E-06 | 2.44198E-05 |
| HOMER2    | -0.232335582 | 8.18651E-06 | 2.44613E-05 |
| GDPD3     | 0.23230183   | 8.21199E-06 | 2.45337E-05 |
| NETO1     | -0.232147117 | 8.3298E-06  | 2.4882E-05  |
| ERRFI1    | -0.232117034 | 8.35289E-06 | 2.49472E-05 |

|           |              |             |             |
|-----------|--------------|-------------|-------------|
| SOCS3     | -0.232049907 | 8.40464E-06 | 2.5098E-05  |
| SAT2      | 0.232030742  | 8.41947E-06 | 2.51385E-05 |
| ECE1      | -0.231993647 | 8.44825E-06 | 2.52206E-05 |
| TM4SF18   | -0.231979324 | 8.45938E-06 | 2.52501E-05 |
| FCN2      | -0.231949464 | 8.48264E-06 | 2.53157E-05 |
| ESYT1     | -0.231924088 | 8.50246E-06 | 2.53711E-05 |
| HSPA12A   | -0.231890107 | 8.52906E-06 | 2.54466E-05 |
| GLMN      | 0.23184828   | 8.56192E-06 | 2.55408E-05 |
| IKBKB     | -0.231844901 | 8.56458E-06 | 2.55449E-05 |
| GALC      | -0.231838799 | 8.56938E-06 | 2.55554E-05 |
| C9orf5    | -0.231827696 | 8.57813E-06 | 2.55777E-05 |
| STBD1     | -0.231824088 | 8.58098E-06 | 2.55824E-05 |
| C4orf27   | 0.23182158   | 8.58295E-06 | 2.55844E-05 |
| ARHGEF35  | -0.231769222 | 8.62435E-06 | 2.5704E-05  |
| SFRS16    | 0.231674499  | 8.69972E-06 | 2.59247E-05 |
| EDEM2     | 0.231634856  | 8.73145E-06 | 2.60154E-05 |
| UQCRC2    | -0.231609237 | 8.75201E-06 | 2.60727E-05 |
| SLC25A36  | -0.231485275 | 8.85216E-06 | 2.63672E-05 |
| SIX5      | 0.231430137  | 8.89706E-06 | 2.64969E-05 |
| RHOT2     | 0.231412833  | 8.91119E-06 | 2.6535E-05  |
| PGD       | 0.231404266  | 8.9182E-06  | 2.65519E-05 |
| DHRS4L2   | 0.231402491  | 8.91965E-06 | 2.65523E-05 |
| FLJ45244  | 0.231387914  | 8.93158E-06 | 2.65838E-05 |
| C19orf63  | 0.231358063  | 8.95607E-06 | 2.66527E-05 |
| ZNF530    | 0.231348081  | 8.96427E-06 | 2.66732E-05 |
| C11orf54  | -0.231313661 | 8.99261E-06 | 2.67535E-05 |
| SLC25A33  | 0.231285973  | 9.01547E-06 | 2.68175E-05 |
| C19orf39  | 0.231241821  | 9.05203E-06 | 2.69222E-05 |
| DNMBP     | -0.231238023 | 9.05519E-06 | 2.69276E-05 |
| SNURF     | -0.231180089 | 9.10339E-06 | 2.70669E-05 |
| TMEM63B   | 0.231120186  | 9.1535E-06  | 2.72118E-05 |
| PGC       | 0.231113613  | 9.15901E-06 | 2.72241E-05 |
| UGT1A5    | -0.231097173 | 9.17282E-06 | 2.72609E-05 |
| POM121    | -0.231095628 | 9.17411E-06 | 2.72609E-05 |
| psiTPTE22 | -0.231085273 | 9.18282E-06 | 2.72827E-05 |
| NGFR      | -0.23105796  | 9.20582E-06 | 2.73469E-05 |
| B3GAT2    | -0.231047503 | 9.21464E-06 | 2.73691E-05 |
| ADCY6     | -0.231001033 | 9.25394E-06 | 2.74817E-05 |
| CLDN20    | -0.230978794 | 9.2728E-06  | 2.75336E-05 |
| DDX59     | -0.230961785 | 9.28725E-06 | 2.75724E-05 |
| SACS      | -0.23094659  | 9.30018E-06 | 2.76067E-05 |
| C13orf37  | 0.230906831  | 9.33409E-06 | 2.77032E-05 |
| PNCK      | 0.230896263  | 9.34312E-06 | 2.77224E-05 |
| C7orf41   | -0.230896005 | 9.34334E-06 | 2.77224E-05 |
| STK17B    | -0.230883732 | 9.35384E-06 | 2.77494E-05 |
| PHF20L1   | -0.230872355 | 9.36359E-06 | 2.77742E-05 |

|           |              |             |             |
|-----------|--------------|-------------|-------------|
| POMT1     | 0.230840448  | 9.39097E-06 | 2.78512E-05 |
| PCDHGA3   | -0.23074869  | 9.47013E-06 | 2.80818E-05 |
| FRAT1     | 0.230726238  | 9.48959E-06 | 2.81354E-05 |
| KDM3A     | -0.230680802 | 9.5291E-06  | 2.82483E-05 |
| DISC1     | -0.230652842 | 9.55349E-06 | 2.83164E-05 |
| PDIK1L    | -0.230607472 | 9.5932E-06  | 2.84298E-05 |
| ALG8      | 0.230569816  | 9.62627E-06 | 2.85236E-05 |
| PRAMEF8   | -0.230564975 | 9.63053E-06 | 2.8532E-05  |
| ZNF543    | -0.23056055  | 9.63443E-06 | 2.85393E-05 |
| THRB      | -0.230524819 | 9.66594E-06 | 2.86284E-05 |
| MEX3A     | 0.230512519  | 9.67681E-06 | 2.86563E-05 |
| CASP8     | -0.230493607 | 9.69354E-06 | 2.87016E-05 |
| HSPA12B   | -0.230491059 | 9.6958E-06  | 2.87026E-05 |
| NUBP1     | 0.230489976  | 9.69676E-06 | 2.87026E-05 |
| GFM2      | -0.230472805 | 9.71198E-06 | 2.87434E-05 |
| CAV1      | -0.23046781  | 9.71641E-06 | 2.87522E-05 |
| GORASP1   | -0.230316841 | 9.85129E-06 | 2.9147E-05  |
| C14orf174 | -0.230309702 | 9.85771E-06 | 2.91617E-05 |
| ZNF566    | -0.230302567 | 9.86414E-06 | 2.91763E-05 |
| FOSB      | -0.230292201 | 9.87347E-06 | 2.9198E-05  |
| EXOC7     | 0.230290724  | 9.87481E-06 | 2.9198E-05  |
| ACAD11    | -0.230289557 | 9.87586E-06 | 2.9198E-05  |
| LYRM5     | -0.230230437 | 9.92929E-06 | 2.93516E-05 |
| IL17F     | 0.230177215  | 9.97762E-06 | 2.94901E-05 |
| NFE2L1    | -0.230143983 | 1.00079E-05 | 2.95752E-05 |
| GRM8      | -0.230139519 | 1.0012E-05  | 2.95829E-05 |
| LOC100124 | -0.230125586 | 1.00247E-05 | 2.96161E-05 |
| CSF2RB    | -0.230058926 | 1.00858E-05 | 2.97923E-05 |
| PFKM      | -0.230046374 | 1.00974E-05 | 2.9822E-05  |
| PPARGC1B  | -0.230028546 | 1.01138E-05 | 2.98661E-05 |
| NLRP1     | -0.230021366 | 1.01204E-05 | 2.98812E-05 |
| EPSTI1    | -0.229970157 | 1.01678E-05 | 3.00166E-05 |
| BCL7A     | -0.229946714 | 1.01895E-05 | 3.00763E-05 |
| NTRK3     | -0.229912745 | 1.02211E-05 | 3.01651E-05 |
| C10orf62  | 0.229888499  | 1.02437E-05 | 3.02273E-05 |
| ZNF23     | -0.229881376 | 1.02504E-05 | 3.02425E-05 |
| UQCRFS1   | 0.229767246  | 1.03575E-05 | 3.0554E-05  |
| JUN       | -0.229754528 | 1.03695E-05 | 3.05848E-05 |
| ABLIM1    | -0.229724718 | 1.03977E-05 | 3.06634E-05 |
| RAB9A     | -0.229705493 | 1.04159E-05 | 3.07126E-05 |
| ARHGAP11B | -0.229699332 | 1.04218E-05 | 3.07253E-05 |
| RPL31P11  | 0.229636596  | 1.04814E-05 | 3.08957E-05 |
| TFPI2     | -0.229635306 | 1.04827E-05 | 3.08957E-05 |
| GBP2      | 0.229623435  | 1.0494E-05  | 3.09245E-05 |
| FAM122B   | -0.229520327 | 1.05929E-05 | 3.12114E-05 |
| C17orf101 | 0.229478108  | 1.06337E-05 | 3.13268E-05 |

|           |              |             |             |
|-----------|--------------|-------------|-------------|
| PANK1     | -0.229475263 | 1.06364E-05 | 3.13303E-05 |
| ADAMTS10  | -0.22946138  | 1.06499E-05 | 3.13653E-05 |
| ZNF646    | -0.229443909 | 1.06668E-05 | 3.14105E-05 |
| C1orf64   | 0.229387604  | 1.07215E-05 | 3.1567E-05  |
| HDAC9     | -0.229384125 | 1.07249E-05 | 3.15723E-05 |
| RWDD4A    | -0.229351647 | 1.07566E-05 | 3.1661E-05  |
| ADAM9     | -0.22932479  | 1.07829E-05 | 3.17337E-05 |
| LOC642597 | -0.229270885 | 1.08359E-05 | 3.18848E-05 |
| AJAP1     | -0.229242925 | 1.08634E-05 | 3.19612E-05 |
| EBF3      | -0.229221168 | 1.08849E-05 | 3.20197E-05 |
| HIC1      | -0.229208552 | 1.08974E-05 | 3.20517E-05 |
| DEPDC1B   | 0.229158536  | 1.0947E-05  | 3.21929E-05 |
| GALNT1    | -0.229141932 | 1.09635E-05 | 3.22367E-05 |
| GAB2      | -0.229112539 | 1.09928E-05 | 3.23181E-05 |
| QRFPR     | -0.229110368 | 1.0995E-05  | 3.23197E-05 |
| RNASEH1   | 0.22909216   | 1.10132E-05 | 3.23684E-05 |
| PDE3B     | -0.229078313 | 1.10271E-05 | 3.24043E-05 |
| YIPF1     | 0.229041651  | 1.10638E-05 | 3.25075E-05 |
| LMOD1     | -0.229039299 | 1.10662E-05 | 3.25097E-05 |
| TIMM44    | 0.229005646  | 1.11E-05    | 3.26043E-05 |
| AMICA1    | 0.228978367  | 1.11275E-05 | 3.26803E-05 |
| ATXN1     | -0.228953671 | 1.11525E-05 | 3.27488E-05 |
| HLA-A     | 0.228929308  | 1.11772E-05 | 3.28164E-05 |
| LBH       | -0.228921139 | 1.11855E-05 | 3.28359E-05 |
| ZBTB48    | 0.228913392  | 1.11933E-05 | 3.28541E-05 |
| B3GALTL   | -0.228888716 | 1.12184E-05 | 3.29229E-05 |
| RIPPLY2   | 0.228886883  | 1.12203E-05 | 3.29235E-05 |
| 44076     | -0.228865774 | 1.12418E-05 | 3.29818E-05 |
| CHRM5     | -0.228856678 | 1.12511E-05 | 3.30041E-05 |
| RBBP9     | -0.228830196 | 1.12781E-05 | 3.30786E-05 |
| APOC1     | 0.228762606  | 1.13475E-05 | 3.32771E-05 |
| KIAA1211  | -0.228732692 | 1.13783E-05 | 3.33625E-05 |
| C12orf48  | 0.228713823  | 1.13977E-05 | 3.34147E-05 |
| TMEM89    | 0.228663177  | 1.14502E-05 | 3.35635E-05 |
| FIGNL2    | 0.228646891  | 1.14671E-05 | 3.36081E-05 |
| GNG4      | 0.228612306  | 1.15031E-05 | 3.37086E-05 |
| LOC338651 | -0.228603918 | 1.15118E-05 | 3.37293E-05 |
| F3        | -0.228597048 | 1.1519E-05  | 3.37453E-05 |
| C16orf93  | 0.228582662  | 1.1534E-05  | 3.37843E-05 |
| PEBP4     | -0.228533906 | 1.1585E-05  | 3.39289E-05 |
| GGTLC2    | 0.228445692  | 1.1678E-05  | 3.41959E-05 |
| LOC339290 | -0.228432369 | 1.1692E-05  | 3.42322E-05 |
| AMIGO1    | -0.228423658 | 1.17013E-05 | 3.42541E-05 |
| RAB10     | -0.228408966 | 1.17168E-05 | 3.42947E-05 |
| SLC39A6   | -0.228378634 | 1.17491E-05 | 3.43839E-05 |
| JKAMP     | -0.228349993 | 1.17795E-05 | 3.44652E-05 |

|           |              |             |             |
|-----------|--------------|-------------|-------------|
| SLC16A13  | -0.228349277 | 1.17803E-05 | 3.44652E-05 |
| RFTN1     | -0.228336986 | 1.17934E-05 | 3.44985E-05 |
| CHRNA6    | -0.22831696  | 1.18148E-05 | 3.4556E-05  |
| LANCL1    | -0.228309359 | 1.18229E-05 | 3.45747E-05 |
| FAM72D    | 0.228304013  | 1.18286E-05 | 3.45863E-05 |
| RAB27A    | -0.228222872 | 1.19158E-05 | 3.4836E-05  |
| C14orf159 | -0.228192418 | 1.19486E-05 | 3.49221E-05 |
| UGT1A6    | 0.228192341  | 1.19487E-05 | 3.49221E-05 |
| PCM1      | -0.228111712 | 1.20361E-05 | 3.51724E-05 |
| PRKRIR    | -0.228014075 | 1.21428E-05 | 3.54789E-05 |
| CCDC3     | -0.228010947 | 1.21463E-05 | 3.54837E-05 |
| TMEM150A  | 0.227962651  | 1.21994E-05 | 3.56337E-05 |
| EXOSC6    | 0.227943701  | 1.22203E-05 | 3.56895E-05 |
| MED6      | 0.22781471   | 1.23634E-05 | 3.61023E-05 |
| NDE1      | -0.227744869 | 1.24416E-05 | 3.63253E-05 |
| PCGF5     | -0.227671775 | 1.25239E-05 | 3.65603E-05 |
| CDH20     | -0.227598291 | 1.26072E-05 | 3.6798E-05  |
| FGF8      | 0.227592235  | 1.26141E-05 | 3.68127E-05 |
| NPAS3     | -0.227545005 | 1.26679E-05 | 3.69644E-05 |
| ZBTB7B    | -0.227542624 | 1.26707E-05 | 3.69669E-05 |
| ARPP21    | -0.227533084 | 1.26816E-05 | 3.69933E-05 |
| C6        | -0.227527902 | 1.26875E-05 | 3.70052E-05 |
| GTF2A1L   | -0.227491847 | 1.27288E-05 | 3.71202E-05 |
| UCK1      | 0.227483905  | 1.27379E-05 | 3.71414E-05 |
| HSD17B7   | 0.227442345  | 1.27857E-05 | 3.72753E-05 |
| SRPK1     | 0.227355389  | 1.28863E-05 | 3.7563E-05  |
| C12orf63  | -0.227350705 | 1.28917E-05 | 3.75733E-05 |
| ITM2A     | -0.227292734 | 1.29592E-05 | 3.77629E-05 |
| HIST1H2BD | 0.227291592  | 1.29605E-05 | 3.77629E-05 |
| ACAA2     | -0.227242377 | 1.30181E-05 | 3.79251E-05 |
| SPRED3    | -0.22720405  | 1.30631E-05 | 3.80506E-05 |
| PIK3R5    | -0.227186655 | 1.30836E-05 | 3.81046E-05 |
| ENTPD1    | -0.227180903 | 1.30904E-05 | 3.81188E-05 |
| ZSWIM1    | 0.227150256  | 1.31265E-05 | 3.82185E-05 |
| TMBIM6    | -0.227134145 | 1.31456E-05 | 3.82684E-05 |
| NCSTN     | -0.227090371 | 1.31974E-05 | 3.84138E-05 |
| PARM1     | -0.227073518 | 1.32175E-05 | 3.84665E-05 |
| MAPK4     | -0.227066436 | 1.32259E-05 | 3.84854E-05 |
| POT1      | -0.227051907 | 1.32432E-05 | 3.85301E-05 |
| CDKN2C    | 0.227033189  | 1.32655E-05 | 3.85894E-05 |
| CROCCL2   | -0.227021193 | 1.32798E-05 | 3.86254E-05 |
| LOC653566 | 0.227016785  | 1.32851E-05 | 3.86351E-05 |
| ZSWIM7    | 0.226990518  | 1.33165E-05 | 3.87208E-05 |
| PPYR1     | -0.226966235 | 1.33456E-05 | 3.87998E-05 |
| C17orf103 | -0.226933146 | 1.33854E-05 | 3.89097E-05 |
| HSD17B10  | 0.226920603  | 1.34005E-05 | 3.89479E-05 |

|           |              |             |             |
|-----------|--------------|-------------|-------------|
| CASC2     | -0.226876196 | 1.34541E-05 | 3.9098E-05  |
| GNAT2     | -0.22686994  | 1.34617E-05 | 3.91143E-05 |
| PCDHB7    | -0.226838894 | 1.34993E-05 | 3.92179E-05 |
| H3F3B     | 0.226826906  | 1.35139E-05 | 3.92544E-05 |
| DNMT3A    | 0.226794465  | 1.35533E-05 | 3.93633E-05 |
| SPN       | -0.226739365 | 1.36206E-05 | 3.95529E-05 |
| BRPF1     | -0.226668715 | 1.37073E-05 | 3.97989E-05 |
| FAM151B   | -0.226643537 | 1.37383E-05 | 3.98832E-05 |
| SNORD116- | -0.226624897 | 1.37613E-05 | 3.99441E-05 |
| OLFML2A   | -0.226621116 | 1.3766E-05  | 3.99519E-05 |
| ZNF483    | -0.226589836 | 1.38047E-05 | 4.00536E-05 |
| TIA1      | -0.226589555 | 1.38051E-05 | 4.00536E-05 |
| HTR1D     | 0.226492173  | 1.39263E-05 | 4.03993E-05 |
| INSR      | -0.226490115 | 1.39288E-05 | 4.04009E-05 |
| PDHX      | -0.226325057 | 1.41366E-05 | 4.09975E-05 |
| ZCCHC10   | 0.226308464  | 1.41576E-05 | 4.10482E-05 |
| LTF       | -0.226308034 | 1.41582E-05 | 4.10482E-05 |
| FRZB      | -0.226291035 | 1.41798E-05 | 4.11048E-05 |
| NRBF2     | -0.226259748 | 1.42196E-05 | 4.12143E-05 |
| RRM2B     | -0.226235954 | 1.425E-05   | 4.12963E-05 |
| PHLDB3    | 0.226211832  | 1.42808E-05 | 4.13796E-05 |
| PHKB      | -0.226181409 | 1.43198E-05 | 4.14866E-05 |
| ATL1      | -0.226175538 | 1.43273E-05 | 4.15024E-05 |
| NDST1     | -0.226132478 | 1.43827E-05 | 4.16567E-05 |
| SLCO2B1   | -0.226084413 | 1.44448E-05 | 4.18304E-05 |
| ZDHHC23   | -0.226080578 | 1.44497E-05 | 4.18387E-05 |
| MOXD1     | -0.22598102  | 1.45791E-05 | 4.22072E-05 |
| GNL3      | 0.225944362  | 1.46271E-05 | 4.23398E-05 |
| MTHFD1    | -0.225905843 | 1.46776E-05 | 4.24799E-05 |
| NAALADL1  | 0.22589783   | 1.46881E-05 | 4.24982E-05 |
| HIST1H3B  | 0.225897771  | 1.46882E-05 | 4.24982E-05 |
| PANX3     | 0.225836518  | 1.47689E-05 | 4.27256E-05 |
| P2RY10    | -0.225819673 | 1.47912E-05 | 4.27838E-05 |
| FAM132A   | 0.225752255  | 1.48807E-05 | 4.30363E-05 |
| DCUN1D4   | -0.225730082 | 1.49102E-05 | 4.31155E-05 |
| PSEN1     | -0.225679562 | 1.49777E-05 | 4.33044E-05 |
| GCOM1     | -0.225673746 | 1.49855E-05 | 4.33207E-05 |
| C9orf140  | 0.225629827  | 1.50444E-05 | 4.34848E-05 |
| ATP6V1B2  | -0.225577224 | 1.51153E-05 | 4.36833E-05 |
| FAM99B    | -0.225575017 | 1.51183E-05 | 4.36856E-05 |
| URB2      | -0.225573158 | 1.51208E-05 | 4.36865E-05 |
| TOP2B     | -0.22552698  | 1.51834E-05 | 4.38608E-05 |
| SPEF1     | 0.225503149  | 1.52157E-05 | 4.39479E-05 |
| UBE2G1    | -0.225459076 | 1.52757E-05 | 4.41149E-05 |
| HIST1H2BK | 0.225455332  | 1.52808E-05 | 4.41232E-05 |
| BTBD3     | -0.225445241 | 1.52946E-05 | 4.41566E-05 |

|          |              |             |             |
|----------|--------------|-------------|-------------|
| TMEM41A  | 0.225394364  | 1.53643E-05 | 4.43513E-05 |
| FAM86D   | 0.225359241  | 1.54125E-05 | 4.44841E-05 |
| METT11D1 | 0.225273133  | 1.55314E-05 | 4.48209E-05 |
| CLDN12   | -0.225246372 | 1.55686E-05 | 4.49215E-05 |
| GRLF1    | -0.225100478 | 1.57725E-05 | 4.55034E-05 |
| LRRC59   | 0.225062848  | 1.58255E-05 | 4.56497E-05 |
| TXNDC6   | -0.225060312 | 1.58291E-05 | 4.56534E-05 |
| P4HA3    | -0.225036666 | 1.58625E-05 | 4.57431E-05 |
| MEP1A    | 0.225019223  | 1.58872E-05 | 4.58077E-05 |
| MAP3K10  | -0.224997309 | 1.59183E-05 | 4.58906E-05 |
| POMZP3   | 0.224989587  | 1.59292E-05 | 4.59155E-05 |
| GAGE2D   | 0.224976202  | 1.59482E-05 | 4.59637E-05 |
| BSCL2    | 0.224970933  | 1.59557E-05 | 4.5977E-05  |
| HPS6     | 0.224969717  | 1.59575E-05 | 4.5977E-05  |
| TMEM40   | 0.224953533  | 1.59805E-05 | 4.60366E-05 |
| PSMB8    | 0.224940067  | 1.59997E-05 | 4.60853E-05 |
| PALB2    | -0.224927442 | 1.60177E-05 | 4.61305E-05 |
| C12orf56 | 0.224870011  | 1.60998E-05 | 4.63604E-05 |
| CD99     | 0.224860497  | 1.61135E-05 | 4.6393E-05  |
| SLC44A4  | 0.224813996  | 1.61804E-05 | 4.65788E-05 |
| TMEM205  | 0.22478036   | 1.62289E-05 | 4.67118E-05 |
| TYMS     | 0.224764675  | 1.62516E-05 | 4.67703E-05 |
| BZW1     | -0.224743399 | 1.62824E-05 | 4.68522E-05 |
| MELK     | 0.2247306    | 1.6301E-05  | 4.68989E-05 |
| TMEM216  | 0.224727323  | 1.63057E-05 | 4.69058E-05 |
| ARHGDI A | 0.224718017  | 1.63192E-05 | 4.69379E-05 |
| LRIT3    | -0.224706557 | 1.63359E-05 | 4.6979E-05  |
| BUB1     | 0.224685665  | 1.63663E-05 | 4.70596E-05 |
| SPATA6   | -0.224550802 | 1.65639E-05 | 4.76209E-05 |
| RBM23    | -0.224522572 | 1.66055E-05 | 4.77337E-05 |
| CDH19    | -0.224478286 | 1.66711E-05 | 4.79152E-05 |
| FBXO33   | -0.22443607  | 1.67338E-05 | 4.80884E-05 |
| ZDHHC24  | 0.224421675  | 1.67552E-05 | 4.8143E-05  |
| SS18     | -0.224364638 | 1.68403E-05 | 4.83808E-05 |
| TMEM52   | 0.224355834  | 1.68535E-05 | 4.84117E-05 |
| WHAMM    | -0.224349433 | 1.68631E-05 | 4.84322E-05 |
| TAOK2    | -0.224315992 | 1.69133E-05 | 4.85693E-05 |
| FCER1A   | -0.224274952 | 1.69751E-05 | 4.87397E-05 |
| SGK3     | -0.224235428 | 1.70348E-05 | 4.89041E-05 |
| CARKD    | -0.224230441 | 1.70423E-05 | 4.89187E-05 |
| GAGE4    | 0.224213605  | 1.70678E-05 | 4.89849E-05 |
| TOM1L2   | -0.224156945 | 1.71539E-05 | 4.92249E-05 |
| PITRM1   | -0.224145233 | 1.71718E-05 | 4.9269E-05  |
| SPIN2B   | 0.224106054  | 1.72316E-05 | 4.94336E-05 |
| FMOD     | -0.224090616 | 1.72553E-05 | 4.94942E-05 |
| RG9MTD1  | 0.22407727   | 1.72757E-05 | 4.95457E-05 |

|           |              |             |             |
|-----------|--------------|-------------|-------------|
| ANAPC13   | 0.224047752  | 1.7321E-05  | 4.96686E-05 |
| TRIM61    | -0.224042951 | 1.73284E-05 | 4.96826E-05 |
| NOMO2     | -0.224023849 | 1.73578E-05 | 4.97597E-05 |
| ZCCHC6    | -0.224004245 | 1.7388E-05  | 4.98392E-05 |
| VCX3A     | 0.223967473  | 1.74448E-05 | 4.99948E-05 |
| TIGD4     | -0.223954458 | 1.7465E-05  | 5.00454E-05 |
| GCC1      | -0.223807367 | 1.76943E-05 | 5.06952E-05 |
| NFX1      | -0.223769833 | 1.77533E-05 | 5.08568E-05 |
| ERO1LB    | -0.223757888 | 1.77721E-05 | 5.09034E-05 |
| ACSM5     | -0.22373367  | 1.78103E-05 | 5.10054E-05 |
| FANCD2    | 0.22372686   | 1.7821E-05  | 5.10289E-05 |
| CAPN1     | -0.223701653 | 1.78609E-05 | 5.11356E-05 |
| NAT10     | 0.223696533  | 1.7869E-05  | 5.11515E-05 |
| SAP30     | 0.223601025  | 1.80208E-05 | 5.15787E-05 |
| LRP1      | -0.223584937 | 1.80465E-05 | 5.16448E-05 |
| INTS4L1   | -0.223507346 | 1.81709E-05 | 5.19934E-05 |
| RNF128    | -0.223505411 | 1.8174E-05  | 5.19948E-05 |
| TMEM90B   | -0.2234279   | 1.82992E-05 | 5.23453E-05 |
| USP18     | -0.223401308 | 1.83423E-05 | 5.24611E-05 |
| ATP5F1    | 0.223345571  | 1.8433E-05  | 5.27128E-05 |
| PARP8     | -0.223330295 | 1.84579E-05 | 5.27765E-05 |
| LOC389458 | 0.223295214  | 1.85152E-05 | 5.2933E-05  |
| FNDC5     | -0.223289389 | 1.85248E-05 | 5.29527E-05 |
| C14orf145 | -0.223287162 | 1.85284E-05 | 5.29555E-05 |
| ARMC1     | -0.223274699 | 1.85489E-05 | 5.30063E-05 |
| FAM172A   | -0.223253609 | 1.85835E-05 | 5.30976E-05 |
| CLSTN2    | -0.223248519 | 1.85919E-05 | 5.31139E-05 |
| SP5       | 0.223210874  | 1.86538E-05 | 5.32833E-05 |
| CCL27     | 0.223192623  | 1.8684E-05  | 5.3356E-05  |
| PRKACB    | -0.223192211 | 1.86847E-05 | 5.3356E-05  |
| COLEC10   | -0.22315933  | 1.8739E-05  | 5.35037E-05 |
| FAM76A    | -0.223157531 | 1.8742E-05  | 5.35045E-05 |
| YWHAE     | 0.223132493  | 1.87835E-05 | 5.36153E-05 |
| FAM189A1  | -0.223111545 | 1.88184E-05 | 5.3707E-05  |
| ZNF785    | -0.223093045 | 1.88491E-05 | 5.37872E-05 |
| C3orf22   | 0.223047648  | 1.89249E-05 | 5.39956E-05 |
| ZNF696    | 0.223018864  | 1.89731E-05 | 5.41253E-05 |
| APLF      | -0.222991203 | 1.90195E-05 | 5.425E-05   |
| SF3A1     | -0.222962081 | 1.90685E-05 | 5.43819E-05 |
| ASPRV1    | -0.222930179 | 1.91223E-05 | 5.45275E-05 |
| C21orf7   | -0.222872357 | 1.92201E-05 | 5.47987E-05 |
| UGT2A3    | -0.222854308 | 1.92508E-05 | 5.48782E-05 |
| HIST1H2BN | 0.222844973  | 1.92667E-05 | 5.49156E-05 |
| OSTC      | 0.22281533   | 1.93171E-05 | 5.50514E-05 |
| GCK       | -0.222813745 | 1.93198E-05 | 5.50514E-05 |
| CTDSP2    | -0.222794956 | 1.93519E-05 | 5.51349E-05 |



|           |              |             |             |
|-----------|--------------|-------------|-------------|
| LOC390595 | 0.222778088  | 1.93807E-05 | 5.52091E-05 |
| CDKN1A    | -0.222775295 | 1.93855E-05 | 5.52148E-05 |
| C21orf119 | 0.222744396  | 1.94384E-05 | 5.53577E-05 |
| RMI1      | -0.222716205 | 1.94868E-05 | 5.54876E-05 |
| SENP1     | -0.222696473 | 1.95208E-05 | 5.55763E-05 |
| MARS      | 0.222633255  | 1.96299E-05 | 5.5879E-05  |
| SNHG10    | 0.222609007  | 1.96719E-05 | 5.59906E-05 |
| ARHGAP27  | -0.222596569 | 1.96935E-05 | 5.6044E-05  |
| CGNL1     | -0.222570007 | 1.97397E-05 | 5.61674E-05 |
| TICAM1    | -0.222533728 | 1.98029E-05 | 5.63393E-05 |
| LOC441454 | -0.222510926 | 1.98427E-05 | 5.64445E-05 |
| BNIP1     | 0.222449349  | 1.99507E-05 | 5.67435E-05 |
| TREM2     | 0.222374595  | 2.00825E-05 | 5.71103E-05 |
| GALNT2    | -0.222308249 | 2.02002E-05 | 5.74367E-05 |
| FGF12     | -0.222286458 | 2.0239E-05  | 5.75388E-05 |
| RAB11FIP3 | -0.222280421 | 2.02497E-05 | 5.75612E-05 |
| PTPN22    | -0.222239313 | 2.03232E-05 | 5.77616E-05 |
| FAM153A   | -0.222236458 | 2.03283E-05 | 5.77679E-05 |
| VPS33B    | 0.222214963  | 2.03668E-05 | 5.7869E-05  |
| FAM108A1  | 0.222146192  | 2.04904E-05 | 5.8212E-05  |
| CCDC50    | -0.222136191 | 2.05084E-05 | 5.82549E-05 |
| DNAJB12   | 0.222133338  | 2.05136E-05 | 5.82613E-05 |
| LASS1     | 0.222118161  | 2.0541E-05  | 5.83308E-05 |
| HOXB2     | -0.222084408 | 2.06021E-05 | 5.84959E-05 |
| NPB       | 0.222075733  | 2.06178E-05 | 5.85322E-05 |
| MSH3      | -0.222040727 | 2.06814E-05 | 5.87043E-05 |
| ITGA2     | -0.222030107 | 2.07007E-05 | 5.87508E-05 |
| CCDC24    | 0.222006777  | 2.07432E-05 | 5.88631E-05 |
| C4orf44   | 0.221995796  | 2.07632E-05 | 5.89115E-05 |
| PCDHA12   | -0.221943614 | 2.08587E-05 | 5.9174E-05  |
| VGF       | 0.221934312  | 2.08758E-05 | 5.92139E-05 |
| CFHR4     | -0.221913188 | 2.09146E-05 | 5.93155E-05 |
| DNM1L     | -0.221893497 | 2.09508E-05 | 5.94098E-05 |
| CCDC106   | 0.221886458  | 2.09638E-05 | 5.94381E-05 |
| LIPA      | -0.221839557 | 2.10503E-05 | 5.96751E-05 |
| NAPSA     | 0.221782374  | 2.11563E-05 | 5.99671E-05 |
| COBL      | -0.221752347 | 2.12122E-05 | 6.01169E-05 |
| TMEM97    | 0.221742757  | 2.12301E-05 | 6.0159E-05  |
| CTBP2     | -0.221740376 | 2.12345E-05 | 6.0163E-05  |
| SCRIB     | 0.221735463  | 2.12437E-05 | 6.01804E-05 |
| DUSP7     | -0.221727526 | 2.12585E-05 | 6.02138E-05 |
| USP2      | -0.221699581 | 2.13107E-05 | 6.03532E-05 |
| CYP26A1   | -0.221693392 | 2.13223E-05 | 6.03774E-05 |
| MSL3      | -0.221688825 | 2.13309E-05 | 6.0393E-05  |
| CSTF1     | 0.22156745   | 2.15593E-05 | 6.10312E-05 |
| ASTN1     | -0.221557763 | 2.15777E-05 | 6.10691E-05 |

|           |              |             |             |
|-----------|--------------|-------------|-------------|
| CARD18    | 0.221557143  | 2.15789E-05 | 6.10691E-05 |
| PCDH19    | -0.221543138 | 2.16054E-05 | 6.11355E-05 |
| KRTAP5-10 | 0.221541296  | 2.16089E-05 | 6.11366E-05 |
| ARL6      | -0.221458879 | 2.17657E-05 | 6.15715E-05 |
| GPD1      | -0.221420128 | 2.18398E-05 | 6.17724E-05 |
| PHOSPHO2  | 0.221414988  | 2.18496E-05 | 6.17914E-05 |
| ZC3H4     | -0.221398287 | 2.18816E-05 | 6.18732E-05 |
| YTHDF3    | -0.221365721 | 2.19442E-05 | 6.20413E-05 |
| ZCCHC4    | -0.221358698 | 2.19577E-05 | 6.20707E-05 |
| USP6      | -0.221343961 | 2.19861E-05 | 6.21421E-05 |
| OMG       | -0.221307868 | 2.20558E-05 | 6.23302E-05 |
| GPRC5A    | -0.221291219 | 2.2088E-05  | 6.24124E-05 |
| SLC16A7   | -0.221265598 | 2.21376E-05 | 6.25438E-05 |
| MNT       | -0.221211489 | 2.22429E-05 | 6.28321E-05 |
| GNA12     | -0.221181537 | 2.23013E-05 | 6.29883E-05 |
| PSORS1C3  | 0.221097183  | 2.24667E-05 | 6.34463E-05 |
| LRRRC43   | -0.221083387 | 2.24938E-05 | 6.3514E-05  |
| TRAF1     | -0.221075104 | 2.25101E-05 | 6.35511E-05 |
| GOT2      | -0.221035633 | 2.25881E-05 | 6.3762E-05  |
| SELE      | -0.220995609 | 2.26673E-05 | 6.39767E-05 |
| CATSPERB  | -0.220984752 | 2.26889E-05 | 6.40285E-05 |
| HPCAL4    | -0.220973079 | 2.27121E-05 | 6.40848E-05 |
| TTC28     | -0.220931836 | 2.27942E-05 | 6.43074E-05 |
| SPNS2     | -0.220898542 | 2.28607E-05 | 6.44859E-05 |
| TMEM135   | -0.220852213 | 2.29535E-05 | 6.47386E-05 |
| TRMT6     | 0.220840442  | 2.29772E-05 | 6.47961E-05 |
| TMEM43    | -0.220824569 | 2.30091E-05 | 6.48769E-05 |
| TEKT4     | 0.22076336   | 2.31326E-05 | 6.52159E-05 |
| FAM46C    | -0.220717649 | 2.32252E-05 | 6.54677E-05 |
| PRPSAP1   | 0.220701526  | 2.32579E-05 | 6.55508E-05 |
| PDHA2     | 0.220651699  | 2.33594E-05 | 6.58275E-05 |
| EGFLAM    | -0.220601195 | 2.34627E-05 | 6.61093E-05 |
| ZC3H3     | 0.22056525   | 2.35365E-05 | 6.63078E-05 |
| WBSCR17   | -0.220502859 | 2.36651E-05 | 6.66607E-05 |
| C13orf26  | -0.220500381 | 2.36703E-05 | 6.66657E-05 |
| KIAA1804  | -0.220472864 | 2.37272E-05 | 6.68166E-05 |
| OR1L8     | -0.220421956 | 2.38329E-05 | 6.71048E-05 |
| SFXN1     | -0.220410379 | 2.3857E-05  | 6.71631E-05 |
| DDX17     | -0.22040703  | 2.3864E-05  | 6.71733E-05 |
| COL8A2    | -0.220389388 | 2.39007E-05 | 6.72673E-05 |
| CLEC1B    | -0.2203353   | 2.40138E-05 | 6.7576E-05  |
| TOR1A     | -0.220268459 | 2.41543E-05 | 6.79576E-05 |
| KCNS2     | -0.220267524 | 2.41562E-05 | 6.79576E-05 |
| FLJ10357  | -0.220205447 | 2.42874E-05 | 6.83169E-05 |
| LOC284232 | -0.220191288 | 2.43174E-05 | 6.83916E-05 |
| LMF2      | 0.22017214   | 2.4358E-05  | 6.84962E-05 |

|           |              |             |             |
|-----------|--------------|-------------|-------------|
| MAGEL2    | -0.220152749 | 2.43993E-05 | 6.86022E-05 |
| C17orf51  | -0.220151165 | 2.44026E-05 | 6.86022E-05 |
| UPP1      | 0.220122495  | 2.44637E-05 | 6.87642E-05 |
| ZNF572    | 0.220111859  | 2.44864E-05 | 6.88183E-05 |
| ANKRD57   | -0.220103054 | 2.45052E-05 | 6.88614E-05 |
| GIT1      | 0.220095023  | 2.45223E-05 | 6.88999E-05 |
| CCL23     | -0.220065157 | 2.45863E-05 | 6.90697E-05 |
| SEC14L3   | -0.22003192  | 2.46576E-05 | 6.92603E-05 |
| PARP12    | 0.220023123  | 2.46765E-05 | 6.93036E-05 |
| CCDC130   | 0.220006457  | 2.47123E-05 | 6.93946E-05 |
| DAPK3     | 0.219999899  | 2.47265E-05 | 6.94244E-05 |
| RALGPS2   | -0.219995706 | 2.47355E-05 | 6.944E-05   |
| CD7       | 0.219942156  | 2.48512E-05 | 6.97549E-05 |
| LRDD      | 0.219910629  | 2.49195E-05 | 6.99368E-05 |
| SAGE1     | 0.21986752   | 2.50132E-05 | 7.019E-05   |
| PBX2      | 0.219845316  | 2.50616E-05 | 7.03159E-05 |
| PROS1     | -0.219831832 | 2.50911E-05 | 7.03886E-05 |
| TRPC6     | -0.219828544 | 2.50982E-05 | 7.03988E-05 |
| SPON2     | 0.219820005  | 2.51169E-05 | 7.04412E-05 |
| LOC284900 | 0.219744722  | 2.5282E-05  | 7.08943E-05 |
| OCRL      | -0.219714974 | 2.53475E-05 | 7.10681E-05 |
| C6orf217  | -0.2197118   | 2.53546E-05 | 7.10777E-05 |
| HDHD3     | 0.219675662  | 2.54344E-05 | 7.12915E-05 |
| KIAA1199  | -0.219600162 | 2.5602E-05  | 7.17511E-05 |
| C9orf68   | -0.219597253 | 2.56084E-05 | 7.17591E-05 |
| LXN       | -0.219550604 | 2.57125E-05 | 7.20407E-05 |
| RRP7B     | 0.219526877  | 2.57656E-05 | 7.21793E-05 |
| SC5DL     | -0.21950443  | 2.5816E-05  | 7.23101E-05 |
| C19orf46  | 0.219432208  | 2.59785E-05 | 7.27552E-05 |
| ADCYAP1R1 | -0.219400582 | 2.605E-05   | 7.29451E-05 |
| ACTL6B    | 0.219392626  | 2.6068E-05  | 7.29853E-05 |
| CLEC18A   | 0.219339974  | 2.61875E-05 | 7.33096E-05 |
| USP48     | -0.219322977 | 2.62262E-05 | 7.34076E-05 |
| C6orf138  | -0.21931312  | 2.62487E-05 | 7.34506E-05 |
| ZNF625    | -0.219312994 | 2.6249E-05  | 7.34506E-05 |
| PFN4      | 0.219268032  | 2.63517E-05 | 7.37276E-05 |
| BIN1      | 0.219265358  | 2.63578E-05 | 7.37344E-05 |
| NECAP2    | 0.219243064  | 2.64088E-05 | 7.38669E-05 |
| XPOT      | -0.21921001  | 2.64847E-05 | 7.40687E-05 |
| TGFA      | -0.219143702 | 2.66376E-05 | 7.44858E-05 |
| WSB1      | -0.219129714 | 2.667E-05   | 7.45658E-05 |
| RNASEL    | -0.219107419 | 2.67216E-05 | 7.46997E-05 |
| KIAA0753  | -0.219094784 | 2.67509E-05 | 7.47711E-05 |
| SPEG      | -0.2190804   | 2.67843E-05 | 7.4854E-05  |
| DTL       | 0.219052637  | 2.68489E-05 | 7.5024E-05  |
| FASTKD5   | -0.218917424 | 2.71656E-05 | 7.58982E-05 |

|           |              |             |             |
|-----------|--------------|-------------|-------------|
| COQ3      | 0.218875473  | 2.72645E-05 | 7.6164E-05  |
| TCF7L2    | -0.218873347 | 2.72696E-05 | 7.61674E-05 |
| NLRP3     | -0.218851715 | 2.73207E-05 | 7.62904E-05 |
| ZNF709    | -0.218851486 | 2.73213E-05 | 7.62904E-05 |
| CCDC14    | -0.218849125 | 2.73269E-05 | 7.62954E-05 |
| XRCC1     | 0.218830997  | 2.73698E-05 | 7.64046E-05 |
| GLIPR1L2  | -0.218764481 | 2.7528E-05  | 7.68354E-05 |
| SFT2D2    | 0.218735269  | 2.75978E-05 | 7.70193E-05 |
| SERPINB1  | 0.218709563  | 2.76593E-05 | 7.71802E-05 |
| CYP4F3    | -0.218674856 | 2.77426E-05 | 7.74017E-05 |
| KIAA1409  | -0.218633175 | 2.78429E-05 | 7.76706E-05 |
| MAT2B     | -0.21859664  | 2.79311E-05 | 7.79058E-05 |
| TMEM39A   | -0.218594828 | 2.79355E-05 | 7.79071E-05 |
| SNORA74B  | 0.218528415  | 2.80965E-05 | 7.83392E-05 |
| PTPN5     | -0.218527681 | 2.80983E-05 | 7.83392E-05 |
| FAM155A   | -0.218516472 | 2.81255E-05 | 7.84023E-05 |
| CCDC104   | 0.218515145  | 2.81288E-05 | 7.84023E-05 |
| OLFM2     | -0.218422814 | 2.83544E-05 | 7.902E-05   |
| RSAD2     | -0.218390462 | 2.84338E-05 | 7.92303E-05 |
| HIBADH    | -0.218373556 | 2.84754E-05 | 7.93352E-05 |
| ERCC6L    | 0.218360502  | 2.85076E-05 | 7.94137E-05 |
| FCAR      | -0.218353015 | 2.8526E-05  | 7.9454E-05  |
| ITGA3     | -0.218335153 | 2.85701E-05 | 7.95657E-05 |
| FLCN      | -0.218328432 | 2.85867E-05 | 7.96008E-05 |
| TRIL      | -0.218317    | 2.8615E-05  | 7.96683E-05 |
| CA13      | -0.218296099 | 2.86667E-05 | 7.98013E-05 |
| HOXD9     | 0.218274234  | 2.8721E-05  | 7.99411E-05 |
| LOC619207 | -0.21826535  | 2.8743E-05  | 7.99913E-05 |
| KIF20A    | 0.218247401  | 2.87877E-05 | 8.01043E-05 |
| PHTF1     | -0.218243208 | 2.87981E-05 | 8.01221E-05 |
| ABCA10    | -0.218223339 | 2.88476E-05 | 8.02486E-05 |
| NDUFV1    | 0.218220369  | 2.8855E-05  | 8.0258E-05  |
| SLC25A34  | -0.218182921 | 2.89485E-05 | 8.05069E-05 |
| CUZD1     | 0.218144999  | 2.90435E-05 | 8.07598E-05 |
| C6orf27   | -0.21807807  | 2.92119E-05 | 8.12166E-05 |
| TMEM181   | -0.218063074 | 2.92497E-05 | 8.13105E-05 |
| RCC1      | 0.218027424  | 2.93399E-05 | 8.15498E-05 |
| QSER1     | -0.218011866 | 2.93794E-05 | 8.1648E-05  |
| DYDC2     | 0.218007583  | 2.93902E-05 | 8.16668E-05 |
| ACOX1     | -0.217992501 | 2.94285E-05 | 8.17618E-05 |
| MAP3K9    | -0.217951414 | 2.95331E-05 | 8.20409E-05 |
| MYLK4     | -0.217937315 | 2.9569E-05  | 8.21293E-05 |
| NRN1      | -0.217931961 | 2.95827E-05 | 8.21558E-05 |
| AKAP3     | -0.217909646 | 2.96397E-05 | 8.23027E-05 |
| FLJ36031  | -0.217906748 | 2.96471E-05 | 8.23118E-05 |
| AFAP1L1   | -0.217886477 | 2.9699E-05  | 8.24444E-05 |

|          |              |             |             |
|----------|--------------|-------------|-------------|
| DCAF7    | -0.217876294 | 2.97251E-05 | 8.25053E-05 |
| GBA3     | -0.217872616 | 2.97346E-05 | 8.252E-05   |
| SNX27    | -0.217861526 | 2.9763E-05  | 8.25875E-05 |
| ZNF324   | -0.217856732 | 2.97753E-05 | 8.26102E-05 |
| DARC     | -0.217821406 | 2.98662E-05 | 8.28507E-05 |
| MFSD2A   | -0.217807316 | 2.99025E-05 | 8.29399E-05 |
| COPS2    | -0.217785935 | 2.99577E-05 | 8.30814E-05 |
| MAPRE3   | -0.217782483 | 2.99666E-05 | 8.30946E-05 |
| FAM109A  | 0.217778386  | 2.99772E-05 | 8.31124E-05 |
| LCN12    | 0.217765971  | 3.00093E-05 | 8.31898E-05 |
| AIF1     | 0.217736664  | 3.00853E-05 | 8.33887E-05 |
| ABCA7    | -0.217704147 | 3.01697E-05 | 8.36008E-05 |
| C10orf84 | 0.217703978  | 3.01702E-05 | 8.36008E-05 |
| PAPOLA   | -0.217684191 | 3.02217E-05 | 8.37319E-05 |
| HOOK1    | -0.21761876  | 3.03926E-05 | 8.41937E-05 |
| EPHX2    | -0.21759992  | 3.0442E-05  | 8.43187E-05 |
| ZNF786   | -0.21757246  | 3.05141E-05 | 8.45067E-05 |
| GSDMB    | 0.217516065  | 3.06627E-05 | 8.49065E-05 |
| KRTAP5-6 | -0.217463161 | 3.08027E-05 | 8.52806E-05 |
| DNM1P35  | 0.217461781  | 3.08064E-05 | 8.52806E-05 |
| KCNJ12   | -0.217293894 | 3.12548E-05 | 8.651E-05   |
| CABC1    | 0.21728059   | 3.12906E-05 | 8.6597E-05  |
| KIAA0408 | -0.217274351 | 3.13074E-05 | 8.66315E-05 |
| CNN3     | -0.217197727 | 3.15144E-05 | 8.71923E-05 |
| EBPL     | 0.217189718  | 3.15361E-05 | 8.72326E-05 |
| C1orf223 | 0.21718912   | 3.15378E-05 | 8.72326E-05 |
| C11orf61 | -0.217180704 | 3.15606E-05 | 8.72836E-05 |
| GOLT1A   | 0.217177104  | 3.15704E-05 | 8.72985E-05 |
| OR56B4   | -0.217128748 | 3.17019E-05 | 8.76501E-05 |
| BRAP     | 0.217088497  | 3.18118E-05 | 8.79417E-05 |
| SIDT2    | -0.217075408 | 3.18476E-05 | 8.80285E-05 |
| PMEPA1   | -0.217037122 | 3.19526E-05 | 8.83064E-05 |
| RGS4     | -0.217025524 | 3.19845E-05 | 8.83822E-05 |
| UBC      | 0.216950776  | 3.21906E-05 | 8.89394E-05 |
| RBMXL1   | -0.216941421 | 3.22164E-05 | 8.89985E-05 |
| KISS1R   | 0.21693884   | 3.22236E-05 | 8.90059E-05 |
| FAM159A  | 0.216929957  | 3.22482E-05 | 8.90615E-05 |
| DMGDH    | -0.21691794  | 3.22815E-05 | 8.91411E-05 |
| EHHADH   | -0.216869817 | 3.24152E-05 | 8.94979E-05 |
| AKAP7    | -0.216848801 | 3.24737E-05 | 8.96471E-05 |
| PRPF3    | 0.216846313  | 3.24807E-05 | 8.96538E-05 |
| ZCCHC24  | -0.216843634 | 3.24881E-05 | 8.96621E-05 |
| NFYC     | 0.216813042  | 3.25736E-05 | 8.98854E-05 |
| CATSPER1 | 0.216804174  | 3.25984E-05 | 8.99414E-05 |
| C21orf56 | 0.216794668  | 3.2625E-05  | 9.00024E-05 |
| PPIG     | -0.216783027 | 3.26576E-05 | 9.00799E-05 |

|           |              |             |             |
|-----------|--------------|-------------|-------------|
| PNPLA7    | -0.216704094 | 3.28796E-05 | 9.06796E-05 |
| BOC       | -0.216657613 | 3.3011E-05  | 9.10294E-05 |
| RARG      | -0.216651635 | 3.30279E-05 | 9.10635E-05 |
| KIAA0427  | -0.216636642 | 3.30705E-05 | 9.11681E-05 |
| FGD2      | -0.216623118 | 3.31088E-05 | 9.12613E-05 |
| ZCCHC3    | 0.216576584  | 3.32412E-05 | 9.16135E-05 |
| CTSL2     | 0.216547851  | 3.33233E-05 | 9.18268E-05 |
| RNF149    | 0.216531227  | 3.33708E-05 | 9.19451E-05 |
| ZNF623    | -0.216460358 | 3.35741E-05 | 9.24926E-05 |
| HEATR4    | -0.21640009  | 3.3748E-05  | 9.29587E-05 |
| INCENP    | -0.216395501 | 3.37613E-05 | 9.29758E-05 |
| REG4      | 0.216394716  | 3.37636E-05 | 9.29758E-05 |
| PTBP1     | 0.216359962  | 3.38642E-05 | 9.32402E-05 |
| LMAN2L    | 0.216352113  | 3.3887E-05  | 9.329E-05   |
| CABYR     | 0.216323512  | 3.39701E-05 | 9.35059E-05 |
| CDRT15P   | -0.216317939 | 3.39864E-05 | 9.35377E-05 |
| NKX3-1    | -0.216272141 | 3.41199E-05 | 9.38923E-05 |
| GNPDA1    | 0.216257034  | 3.41641E-05 | 9.40009E-05 |
| MGC27382  | -0.216237448 | 3.42215E-05 | 9.41456E-05 |
| TSNARE1   | 0.216221181  | 3.42692E-05 | 9.42638E-05 |
| GABRD     | 0.216189156  | 3.43632E-05 | 9.45096E-05 |
| DCTN1     | 0.21618579   | 3.43731E-05 | 9.45238E-05 |
| PART1     | 0.21617784   | 3.43965E-05 | 9.45751E-05 |
| TTC15     | 0.216168456  | 3.44242E-05 | 9.4638E-05  |
| ZMPSTE24  | -0.216146176 | 3.44899E-05 | 9.48056E-05 |
| FSHR      | -0.216103992 | 3.46146E-05 | 9.51353E-05 |
| LRRC33    | -0.216089864 | 3.46565E-05 | 9.52372E-05 |
| DGKI      | -0.21605149  | 3.47705E-05 | 9.55373E-05 |
| TGM2      | -0.216043787 | 3.47934E-05 | 9.5587E-05  |
| ATG2A     | -0.216035374 | 3.48184E-05 | 9.56427E-05 |
| PSMD5     | -0.21603244  | 3.48272E-05 | 9.56535E-05 |
| MEGF6     | -0.216029965 | 3.48346E-05 | 9.56606E-05 |
| TMEM128   | -0.216024886 | 3.48497E-05 | 9.56889E-05 |
| HNRNPD    | 0.215942785  | 3.50953E-05 | 9.63499E-05 |
| HIFX      | 0.215940908  | 3.51009E-05 | 9.63521E-05 |
| MEF2B     | 0.215934868  | 3.5119E-05  | 9.63886E-05 |
| LOC144571 | 0.215907956  | 3.51999E-05 | 9.65973E-05 |
| ABCG4     | -0.215896969 | 3.5233E-05  | 9.66748E-05 |
| AEBP1     | -0.215842825 | 3.53965E-05 | 9.71098E-05 |
| PRSS23    | -0.215837533 | 3.54125E-05 | 9.71404E-05 |
| MYL4      | 0.21576515   | 3.56322E-05 | 9.77296E-05 |
| CLCN6     | -0.215747688 | 3.56854E-05 | 9.78621E-05 |
| PKNOX2    | -0.215641865 | 3.60094E-05 | 9.8737E-05  |
| TBCD      | 0.215625214  | 3.60606E-05 | 9.88638E-05 |
| STX16     | -0.215620343 | 3.60756E-05 | 9.88913E-05 |
| SRXN1     | 0.215510588  | 3.64152E-05 | 9.98084E-05 |

|           |              |             |             |
|-----------|--------------|-------------|-------------|
| SLC38A4   | -0.215502597 | 3.644E-05   | 9.98628E-05 |
| SH3PXD2A  | -0.215500402 | 3.64468E-05 | 9.98677E-05 |
| SLC25A10  | 0.215491064  | 3.64759E-05 | 9.99336E-05 |
| C1orf101  | -0.215433221 | 3.66563E-05 | 0.000100414 |
| PRDX3     | -0.215430038 | 3.66663E-05 | 0.000100428 |
| TLR5      | -0.215412238 | 3.6722E-05  | 0.000100566 |
| TAF4B     | -0.215402463 | 3.67526E-05 | 0.000100636 |
| TRIM34    | -0.215376444 | 3.68343E-05 | 0.000100846 |
| MESDC2    | 0.215365618  | 3.68683E-05 | 0.000100925 |
| LOC285733 | 0.215342323  | 3.69416E-05 | 0.000101112 |
| C17orf86  | 0.215321624  | 3.70069E-05 | 0.00010127  |
| BOP1      | 0.215320842  | 3.70093E-05 | 0.00010127  |
| MAD2L1    | 0.215266643  | 3.71807E-05 | 0.000101725 |
| BTG2      | -0.215200052 | 3.73924E-05 | 0.00010229  |
| DEM1      | 0.215175438  | 3.74709E-05 | 0.00010249  |
| EVI5L     | -0.215144166 | 3.75708E-05 | 0.00010275  |
| PAPSS2    | -0.215096419 | 3.77239E-05 | 0.000103154 |
| PLCE1     | -0.21505729  | 3.78499E-05 | 0.000103484 |
| RGS16     | -0.215042573 | 3.78973E-05 | 0.0001036   |
| KIF3B     | -0.215032815 | 3.79288E-05 | 0.000103672 |
| UGT1A4    | -0.214970825 | 3.81295E-05 | 0.000104206 |
| SLC22A1   | -0.214935883 | 3.82431E-05 | 0.000104502 |
| LIPT2     | 0.214927744  | 3.82696E-05 | 0.00010456  |
| WDR66     | -0.214914148 | 3.83139E-05 | 0.000104667 |
| C20orf12  | -0.214905708 | 3.83414E-05 | 0.000104728 |
| CHMP4C    | 0.214816657  | 3.8633E-05  | 0.00010551  |
| ZNF445    | -0.214809307 | 3.86572E-05 | 0.000105561 |
| ZNF518B   | -0.21479393  | 3.87078E-05 | 0.000105685 |
| KCNMB3    | 0.214765627  | 3.88011E-05 | 0.000105925 |
| LPCAT1    | 0.214681452  | 3.90797E-05 | 0.000106671 |
| BEX2      | 0.214668652  | 3.91223E-05 | 0.000106773 |
| C6orf89   | 0.214629915  | 3.92513E-05 | 0.00010711  |
| FAM133A   | 0.214572938  | 3.94418E-05 | 0.000107608 |
| OGDHL     | -0.214572103 | 3.94446E-05 | 0.000107608 |
| TMX2      | 0.214568308  | 3.94573E-05 | 0.000107628 |
| ATAD1     | -0.214556673 | 3.94964E-05 | 0.00010772  |
| VCX       | 0.214482185  | 3.9747E-05  | 0.000108389 |
| UNC45B    | -0.214472757 | 3.97789E-05 | 0.000108461 |
| HIST4H4   | -0.214454155 | 3.98418E-05 | 0.00010861  |
| CHUK      | -0.214453349 | 3.98445E-05 | 0.00010861  |
| ACVR1C    | -0.214441578 | 3.98843E-05 | 0.000108704 |
| PDIA2     | 0.214405123  | 4.0008E-05  | 0.000109026 |
| WAC       | -0.214381577 | 4.0088E-05  | 0.000109229 |
| CCM2      | 0.214377674  | 4.01013E-05 | 0.00010925  |
| MFAP4     | -0.214289692 | 4.04019E-05 | 0.000110054 |
| DHX37     | 0.214259075  | 4.0507E-05  | 0.000110325 |

|           |              |             |             |
|-----------|--------------|-------------|-------------|
| PLD1      | -0.214250173 | 4.05376E-05 | 0.000110393 |
| BCAM      | 0.214198502  | 4.07156E-05 | 0.000110863 |
| STOML1    | 0.214109852  | 4.10229E-05 | 0.000111684 |
| ACTC1     | -0.214053062 | 4.12208E-05 | 0.000112208 |
| PTGER2    | -0.214041903 | 4.12598E-05 | 0.000112299 |
| C10orf114 | 0.214021688  | 4.13306E-05 | 0.000112476 |
| B4GALT6   | -0.214016405 | 4.13491E-05 | 0.000112511 |
| IL9R      | -0.213978631 | 4.14817E-05 | 0.000112856 |
| MED17     | -0.213956984 | 4.15578E-05 | 0.000113048 |
| KIAA1826  | -0.213894612 | 4.1778E-05  | 0.000113631 |
| ART1      | -0.213883835 | 4.18161E-05 | 0.000113719 |
| SH3GL1    | 0.21386873   | 4.18696E-05 | 0.00011385  |
| CWF19L2   | -0.213863373 | 4.18886E-05 | 0.000113886 |
| MITD1     | 0.21386019   | 4.18999E-05 | 0.000113901 |
| SS18L1    | -0.21385818  | 4.19071E-05 | 0.000113905 |
| FNDC3B    | -0.213832265 | 4.19991E-05 | 0.000114139 |
| FUT8      | -0.213828757 | 4.20116E-05 | 0.000114158 |
| PNMAL2    | -0.213773346 | 4.22091E-05 | 0.000114679 |
| DIAPH2    | -0.213752423 | 4.2284E-05  | 0.000114866 |
| SCN4A     | -0.21371324  | 4.24244E-05 | 0.000115232 |
| INPPL1    | -0.21370471  | 4.2455E-05  | 0.0001153   |
| CBX5      | -0.213696292 | 4.24853E-05 | 0.000115366 |
| ELF4      | -0.213668516 | 4.25853E-05 | 0.000115622 |
| KCNH1     | -0.213639766 | 4.2689E-05  | 0.000115887 |
| MPND      | 0.21359471   | 4.2852E-05  | 0.000116314 |
| PPP4R4    | -0.213576964 | 4.29163E-05 | 0.000116473 |
| NEBL      | -0.213538326 | 4.30568E-05 | 0.000116838 |
| MYOZ2     | -0.213510734 | 4.31573E-05 | 0.000117095 |
| C2CD4D    | -0.213494957 | 4.32149E-05 | 0.000117235 |
| EIF3L     | 0.213481529  | 4.3264E-05  | 0.000117351 |
| C11orf86  | 0.213480084  | 4.32693E-05 | 0.000117351 |
| WDR78     | -0.213462664 | 4.33331E-05 | 0.000117508 |
| PECI      | 0.21343576   | 4.34317E-05 | 0.000117759 |
| CSMD2     | -0.213409054 | 4.35298E-05 | 0.000118009 |
| LNX1      | -0.213402137 | 4.35553E-05 | 0.000118062 |
| CNP       | 0.213340309  | 4.37834E-05 | 0.000118664 |
| MLF1IP    | 0.213332836  | 4.38111E-05 | 0.000118723 |
| MFAP5     | -0.213308923 | 4.38996E-05 | 0.000118947 |
| AK5       | -0.213282243 | 4.39987E-05 | 0.000119199 |
| DNASE1L3  | -0.21325427  | 4.41027E-05 | 0.000119465 |
| ERCC5     | -0.213117517 | 4.46148E-05 | 0.000120836 |
| TNFSF12-T | 0.213093585  | 4.4705E-05  | 0.000121063 |
| GPR64     | -0.213083911 | 4.47415E-05 | 0.000121146 |
| ACAD9     | 0.21296177   | 4.52048E-05 | 0.000122384 |
| BCAS4     | 0.212952106  | 4.52417E-05 | 0.000122467 |
| AQP7P3    | 0.212905312  | 4.54206E-05 | 0.000122934 |



|         |              |             |             |
|---------|--------------|-------------|-------------|
| PPP2R1B | -0.212885639 | 4.54959E-05 | 0.000123122 |
| SLC39A3 | 0.212862155  | 4.55861E-05 | 0.000123349 |
| CRIP3   | 0.212849647  | 4.56342E-05 | 0.000123462 |
| ERMP1   | -0.212840318 | 4.56701E-05 | 0.000123542 |
| OR5K2   | -0.212823707 | 4.5734E-05  | 0.000123699 |
| CCDC122 | -0.212814788 | 4.57684E-05 | 0.000123775 |
| KCNJ13  | -0.212812878 | 4.57758E-05 | 0.000123778 |
| ATXN7L2 | 0.212786978  | 4.58758E-05 | 0.000124032 |
| RBM44   | -0.212741414 | 4.60523E-05 | 0.000124492 |
| FOXP3   | -0.212735359 | 4.60757E-05 | 0.000124538 |
| GOLGA8A | -0.212711968 | 4.61666E-05 | 0.000124751 |
| RENBP   | 0.212711929  | 4.61668E-05 | 0.000124751 |
| DCTD    | -0.212706554 | 4.61877E-05 | 0.00012479  |
| ALDH1A2 | -0.21264599  | 4.64238E-05 | 0.000125411 |
| RRAGB   | -0.212634348 | 4.64694E-05 | 0.000125517 |
| RAD17   | -0.212593163 | 4.66308E-05 | 0.000125936 |
| RHBG    | 0.212562285  | 4.67521E-05 | 0.000126247 |
| ZNF695  | 0.212545911  | 4.68166E-05 | 0.000126404 |
| KCND2   | -0.212525406 | 4.68975E-05 | 0.000126605 |
| UPK3A   | 0.212494143  | 4.7021E-05  | 0.000126906 |
| RNU11   | 0.212493961  | 4.70217E-05 | 0.000126906 |
| LRRC1   | 0.212483129  | 4.70646E-05 | 0.000127004 |
| ITPR2   | -0.212478171 | 4.70842E-05 | 0.00012704  |
| PTGIS   | -0.212438822 | 4.72404E-05 | 0.000127444 |
| LIMD2   | 0.212432705  | 4.72647E-05 | 0.000127492 |
| ANK1    | -0.212420908 | 4.73116E-05 | 0.000127602 |
| MRPL46  | 0.212402323  | 4.73856E-05 | 0.000127784 |
| VAV2    | -0.212336246 | 4.76497E-05 | 0.000128479 |
| TTL4    | 0.212317401  | 4.77252E-05 | 0.000128665 |
| SLC39A4 | 0.212299962  | 4.77952E-05 | 0.000128836 |
| FAM66C  | -0.212253316 | 4.7983E-05  | 0.000129325 |
| HARS2   | 0.212247846  | 4.80051E-05 | 0.000129367 |
| CAPN2   | -0.212231082 | 4.80727E-05 | 0.000129532 |
| EID2    | 0.212205972  | 4.81743E-05 | 0.000129788 |
| CADPS2  | -0.21220245  | 4.81885E-05 | 0.000129809 |
| ADAMTS9 | -0.212190792 | 4.82358E-05 | 0.000129914 |
| C18orf1 | -0.212189587 | 4.82407E-05 | 0.000129914 |
| NFKB2   | 0.212184596  | 4.82609E-05 | 0.000129951 |
| TMEM27  | -0.212180265 | 4.82785E-05 | 0.00012998  |
| ODZ3    | -0.212140696 | 4.84392E-05 | 0.000130396 |
| RRAGD   | 0.212115016  | 4.85438E-05 | 0.00013066  |
| KIF18B  | 0.21211186   | 4.85567E-05 | 0.000130677 |
| TCL1B   | 0.212096131  | 4.86209E-05 | 0.000130832 |
| MDC1    | 0.212081653  | 4.868E-05   | 0.000130973 |
| HMG20B  | 0.212078069  | 4.86947E-05 | 0.000130995 |
| CXorf48 | 0.212017547  | 4.89428E-05 | 0.000131644 |

|           |              |             |             |
|-----------|--------------|-------------|-------------|
| CCDC102B  | -0.211987019 | 4.90683E-05 | 0.000131964 |
| LZTS2     | 0.211966366  | 4.91535E-05 | 0.000132175 |
| LOC728190 | 0.211945932  | 4.92379E-05 | 0.000132384 |
| GTF2IRD2B | -0.211938138 | 4.92701E-05 | 0.000132453 |
| LIME1     | 0.211928255  | 4.9311E-05  | 0.000132545 |
| BTBD16    | 0.211881099  | 4.95065E-05 | 0.000133053 |
| ARRB2     | 0.211815511  | 4.97796E-05 | 0.000133769 |
| DDIT4     | -0.211791656 | 4.98793E-05 | 0.000134019 |
| C8orf55   | 0.211778046  | 4.99362E-05 | 0.000134153 |
| GSTO2     | 0.211776476  | 4.99428E-05 | 0.000134153 |
| ZNF248    | -0.211761307 | 5.00064E-05 | 0.000134306 |
| ZNF585B   | -0.211750093 | 5.00534E-05 | 0.000134414 |
| RSAD1     | 0.211714289  | 5.02039E-05 | 0.0001348   |
| ACADSB    | -0.211612533 | 5.06339E-05 | 0.000135936 |
| WNT8B     | -0.211603951 | 5.06703E-05 | 0.000136016 |
| RGS10     | 0.211587416  | 5.07406E-05 | 0.000136186 |
| SH3TC2    | -0.211550952 | 5.08958E-05 | 0.000136584 |
| MATR3     | -0.211535124 | 5.09633E-05 | 0.000136747 |
| ACCN2     | 0.211500393  | 5.11118E-05 | 0.000137127 |
| THNSL1    | -0.211486141 | 5.11729E-05 | 0.000137272 |
| C17orf102 | -0.211450522 | 5.13257E-05 | 0.000137664 |
| S100A9    | 0.211447514  | 5.13386E-05 | 0.00013768  |
| RNH1      | 0.211431229  | 5.14087E-05 | 0.000137849 |
| ZNF548    | -0.21139804  | 5.15517E-05 | 0.000138214 |
| GRAMD4    | -0.211352777 | 5.17474E-05 | 0.00013872  |
| GLIS2     | -0.211324064 | 5.18719E-05 | 0.000139035 |
| GSTA3     | 0.211314824  | 5.1912E-05  | 0.000139124 |
| FOXP4     | 0.211272078  | 5.2098E-05  | 0.000139603 |
| CHST12    | 0.21126262   | 5.21392E-05 | 0.000139695 |
| SSR1      | 0.211257895  | 5.21599E-05 | 0.000139713 |
| FPGS      | 0.211257856  | 5.216E-05   | 0.000139713 |
| PNPT1     | -0.211181032 | 5.24963E-05 | 0.000140579 |
| MAGED2    | 0.211180748  | 5.24975E-05 | 0.000140579 |
| MFF       | 0.211101965  | 5.28444E-05 | 0.000141489 |
| VDAC1     | 0.211094044  | 5.28794E-05 | 0.000141564 |
| EFS       | -0.211087782 | 5.29071E-05 | 0.000141619 |
| PMP22     | -0.211049669 | 5.30759E-05 | 0.000142052 |
| TP53INP2  | -0.211029674 | 5.31647E-05 | 0.00014227  |
| EXOC4     | 0.211027067  | 5.31763E-05 | 0.000142278 |
| SH3RF3    | -0.211025779 | 5.3182E-05  | 0.000142278 |
| IRS2      | -0.211005745 | 5.32711E-05 | 0.000142498 |
| NCKIPSD   | 0.210991217  | 5.33358E-05 | 0.000142651 |
| AMY2B     | -0.210951281 | 5.35141E-05 | 0.000143109 |
| C19orf28  | 0.210879298  | 5.38367E-05 | 0.000143953 |
| PLEKHA9   | 0.210876487  | 5.38494E-05 | 0.000143967 |
| LOC100287 | 0.210815511  | 5.41242E-05 | 0.000144674 |

|           |              |             |             |
|-----------|--------------|-------------|-------------|
| PLXNA2    | -0.210814598 | 5.41284E-05 | 0.000144674 |
| PHF19     | 0.210796876  | 5.42085E-05 | 0.000144869 |
| DSCAM     | -0.21069589  | 5.46673E-05 | 0.000146075 |
| RTN4      | -0.210649254 | 5.48804E-05 | 0.000146625 |
| NANOS3    | 0.210598013  | 5.51154E-05 | 0.000147233 |
| APOC2     | 0.210580168  | 5.51975E-05 | 0.000147433 |
| ZBTB34    | -0.210578246 | 5.52063E-05 | 0.000147437 |
| LOC81691  | 0.210567664  | 5.52551E-05 | 0.000147547 |
| PLCH2     | -0.210474965 | 5.56837E-05 | 0.000148672 |
| XRCC3     | 0.210433232  | 5.58777E-05 | 0.00014917  |
| MCM6      | 0.210418221  | 5.59477E-05 | 0.000149336 |
| ZNF486    | -0.210416346 | 5.59564E-05 | 0.00014934  |
| PLOD1     | 0.210400388  | 5.60308E-05 | 0.000149518 |
| MMP21     | -0.210384261 | 5.61062E-05 | 0.000149699 |
| H6PD      | -0.210352481 | 5.62549E-05 | 0.000150076 |
| ACAT1     | -0.210310872 | 5.64502E-05 | 0.000150577 |
| C17orf50  | 0.210290802  | 5.65446E-05 | 0.000150808 |
| LOC441204 | -0.210276175 | 5.66135E-05 | 0.000150972 |
| KIAA1244  | -0.210274281 | 5.66225E-05 | 0.000150976 |
| HIGD1B    | 0.210250924  | 5.67327E-05 | 0.000151249 |
| ADAL      | -0.210223211 | 5.68637E-05 | 0.000151567 |
| PCCA      | -0.210222244 | 5.68683E-05 | 0.000151567 |
| CCDC154   | 0.210220874  | 5.68748E-05 | 0.000151567 |
| VAT1      | 0.210197598  | 5.69851E-05 | 0.000151841 |
| ARL13A    | -0.210152619 | 5.71988E-05 | 0.00015239  |
| LCP2      | -0.210132696 | 5.72937E-05 | 0.00015261  |
| FOXK2     | 0.210132087  | 5.72966E-05 | 0.00015261  |
| SLC39A1   | 0.210126802  | 5.73218E-05 | 0.000152656 |
| PPP1R3G   | 0.210121068  | 5.73492E-05 | 0.000152709 |
| SYP       | 0.210111748  | 5.73937E-05 | 0.000152807 |
| LOC441046 | -0.210105241 | 5.74248E-05 | 0.000152869 |
| SBF1      | -0.210083789 | 5.75273E-05 | 0.000153109 |
| LRRC49    | -0.210083214 | 5.75301E-05 | 0.000153109 |
| RTKN      | 0.210047514  | 5.77012E-05 | 0.000153543 |
| CNOT1     | -0.210026646 | 5.78014E-05 | 0.00015379  |
| L3MBTL4   | -0.210003492 | 5.79128E-05 | 0.000154066 |
| MAPK14    | 0.2098706    | 5.85562E-05 | 0.000155756 |
| MS4A7     | -0.209798866 | 5.89063E-05 | 0.000156666 |
| ATP8B2    | -0.209714896 | 5.93186E-05 | 0.000157742 |
| VRK2      | -0.209676724 | 5.95069E-05 | 0.000158222 |
| STARD4    | -0.20962868  | 5.97447E-05 | 0.000158833 |
| GNLY      | 0.20958799   | 5.99469E-05 | 0.000159349 |
| BMP8B     | -0.209546696 | 6.01527E-05 | 0.000159875 |
| KIAA0467  | -0.209537607 | 6.0198E-05  | 0.000159974 |
| DNAJC25   | -0.209519555 | 6.02883E-05 | 0.000160192 |
| SHISA2    | -0.209505944 | 6.03564E-05 | 0.000160352 |

|           |              |             |             |
|-----------|--------------|-------------|-------------|
| TMEM132E  | -0.209500744 | 6.03824E-05 | 0.0001604   |
| SHKBP1    | 0.209487113  | 6.04508E-05 | 0.00016056  |
| DTX1      | -0.209470661 | 6.05333E-05 | 0.000160758 |
| CWC22     | -0.209446908 | 6.06527E-05 | 0.000161053 |
| THEMIS    | -0.209434485 | 6.07152E-05 | 0.000161198 |
| C7orf40   | 0.209384544  | 6.09672E-05 | 0.000161845 |
| JPH2      | -0.20935628  | 6.11102E-05 | 0.000162203 |
| MTO1      | -0.209313917 | 6.13252E-05 | 0.000162752 |
| COQ4      | 0.209249766  | 6.16521E-05 | 0.000163598 |
| DOCK2     | -0.209238722 | 6.17086E-05 | 0.000163726 |
| PLEKHH2   | -0.209221979 | 6.17942E-05 | 0.000163931 |
| ADAT3     | 0.209189881  | 6.19588E-05 | 0.000164346 |
| NCRNA0010 | 0.209155632  | 6.21348E-05 | 0.000164791 |
| DKFZp686A | 0.209151475  | 6.21562E-05 | 0.000164826 |
| STARD5    | -0.209088957 | 6.24788E-05 | 0.000165659 |
| SEMA6C    | 0.209079541  | 6.25276E-05 | 0.000165766 |
| GPX3      | 0.209026469  | 6.28029E-05 | 0.000166474 |
| PTPRA     | -0.208987653 | 6.3005E-05  | 0.000166988 |
| C2orf55   | -0.208958828 | 6.31555E-05 | 0.000167364 |
| C1orf168  | -0.20892911  | 6.33109E-05 | 0.000167754 |
| RAB11FIP1 | -0.208879332 | 6.35722E-05 | 0.000168424 |
| OVGP1     | 0.208861071  | 6.36683E-05 | 0.000168656 |
| MICA      | 0.208837979  | 6.379E-05   | 0.000168956 |
| FGD1      | -0.208820755 | 6.38809E-05 | 0.000169174 |
| C3orf59   | -0.208788328 | 6.40525E-05 | 0.000169601 |
| DNAJC30   | 0.208787035  | 6.40593E-05 | 0.000169601 |
| UCN2      | 0.208771999  | 6.4139E-05  | 0.00016979  |
| SPR       | 0.208731128  | 6.43561E-05 | 0.000170342 |
| ALOX5     | -0.208702065 | 6.45108E-05 | 0.000170729 |
| CCND2     | -0.208671704 | 6.46729E-05 | 0.000171135 |
| SPHAR     | 0.20865739   | 6.47495E-05 | 0.000171315 |
| HUS1B     | 0.208641299  | 6.48356E-05 | 0.00017152  |
| CCBL1     | 0.208634723  | 6.48708E-05 | 0.00017159  |
| GPR45     | -0.208610161 | 6.50026E-05 | 0.000171916 |
| WBSCR27   | 0.208585726  | 6.51339E-05 | 0.00017224  |
| SIGLEC6   | -0.208513085 | 6.55259E-05 | 0.000173254 |
| HHIPL2    | 0.208493711  | 6.56308E-05 | 0.000173508 |
| MCF2      | -0.208489896 | 6.56515E-05 | 0.00017354  |
| GAGE12D   | 0.20847459   | 6.57345E-05 | 0.000173736 |
| ASAP1     | -0.208472341 | 6.57467E-05 | 0.000173745 |
| TLR2      | -0.208430958 | 6.59717E-05 | 0.000174317 |
| GPATCH1   | 0.208409555  | 6.60883E-05 | 0.000174602 |
| NT5C3     | 0.208402482  | 6.61269E-05 | 0.000174681 |
| KCNA5     | -0.208364924 | 6.63322E-05 | 0.0001752   |
| MMP28     | -0.208362678 | 6.63445E-05 | 0.000175209 |
| RACGAP1P  | 0.208356764  | 6.63769E-05 | 0.000175271 |

|           |              |             |             |
|-----------|--------------|-------------|-------------|
| LOC652276 | -0.208315765 | 6.66018E-05 | 0.000175842 |
| ASXL3     | -0.208312465 | 6.66199E-05 | 0.000175866 |
| SNAP47    | 0.208290954  | 6.67382E-05 | 0.000176155 |
| SLC28A1   | -0.208267157 | 6.68694E-05 | 0.000176478 |
| NR2F1     | -0.208249408 | 6.69673E-05 | 0.000176713 |
| PRR11     | -0.208218689 | 6.71372E-05 | 0.000177138 |
| GTPBP5    | 0.20819941   | 6.7244E-05  | 0.000177396 |
| ARHGEF3   | -0.208196738 | 6.72588E-05 | 0.000177412 |
| NCR1      | -0.208183492 | 6.73323E-05 | 0.000177582 |
| HNRNPAB   | 0.208116198  | 6.77068E-05 | 0.000178546 |
| NUDT12    | -0.208074439 | 6.79402E-05 | 0.000179138 |
| CDIPT     | 0.208069161  | 6.79698E-05 | 0.000179192 |
| BEND7     | -0.2079993   | 6.83621E-05 | 0.000180203 |
| NPIP      | -0.207961137 | 6.85774E-05 | 0.000180746 |
| C3orf33   | 0.207946566  | 6.86597E-05 | 0.000180939 |
| PBK       | 0.207917432  | 6.88246E-05 | 0.00018135  |
| MARCKS    | 0.207886338  | 6.9001E-05  | 0.000181791 |
| KDM2B     | -0.207874617 | 6.90677E-05 | 0.000181942 |
| LST1      | 0.207863963  | 6.91283E-05 | 0.000182078 |
| B3GNT5    | -0.207820046 | 6.93786E-05 | 0.000182713 |
| LY6H      | 0.207781833  | 6.95971E-05 | 0.000183264 |
| EYS       | -0.207706565 | 7.00294E-05 | 0.000184378 |
| TAX1BP1   | -0.207633255 | 7.04529E-05 | 0.000185469 |
| GUCY2D    | 0.20760417   | 7.06216E-05 | 0.000185888 |
| HULC      | 0.207587297  | 7.07197E-05 | 0.000186122 |
| SAR1B     | -0.207483452 | 7.13259E-05 | 0.000187692 |
| FGL2      | -0.207393035 | 7.18576E-05 | 0.000189067 |
| SCFD1     | -0.207387217 | 7.1892E-05  | 0.000189132 |
| C1orf203  | 0.207367988  | 7.20056E-05 | 0.000189406 |
| MCCC1     | -0.207342655 | 7.21556E-05 | 0.000189775 |
| H2AFY     | 0.207270499  | 7.25843E-05 | 0.000190878 |
| MLYCD     | -0.207252083 | 7.26941E-05 | 0.000191141 |
| TNIP2     | 0.207200667  | 7.30015E-05 | 0.000191924 |
| ZDHHC8    | -0.207196087 | 7.30289E-05 | 0.000191971 |
| SNCG      | 0.207156389  | 7.32672E-05 | 0.000192572 |
| HIST1H2AJ | 0.207144082  | 7.33412E-05 | 0.000192741 |
| ID2       | -0.207135684 | 7.33918E-05 | 0.000192848 |
| ZNF658    | -0.207089986 | 7.36674E-05 | 0.000193547 |
| KIF15     | 0.207053603  | 7.38875E-05 | 0.0001941   |
| PARG      | -0.20705145  | 7.39006E-05 | 0.000194108 |
| LOC338758 | -0.207030702 | 7.40264E-05 | 0.000194413 |
| FAM49A    | -0.207027725 | 7.40445E-05 | 0.000194435 |
| HSD17B8   | 0.20693846   | 7.45883E-05 | 0.000195837 |
| JUNB      | -0.20690402  | 7.47991E-05 | 0.000196365 |
| PEG3AS    | -0.206898686 | 7.48318E-05 | 0.000196425 |
| FHIT      | 0.206891268  | 7.48773E-05 | 0.000196518 |

|            |              |             |             |
|------------|--------------|-------------|-------------|
| RIOK3      | -0.206884004 | 7.49219E-05 | 0.000196609 |
| TRAM2      | -0.206875081 | 7.49767E-05 | 0.000196716 |
| SLC2A3     | -0.206874173 | 7.49822E-05 | 0.000196716 |
| RAB31      | -0.20686687  | 7.50271E-05 | 0.000196808 |
| ARHGAP17   | -0.206848648 | 7.51392E-05 | 0.000197076 |
| POU5F1     | 0.206837445  | 7.52082E-05 | 0.000197231 |
| LOC147804  | 0.206831216  | 7.52466E-05 | 0.000197306 |
| TTF2       | -0.206788374 | 7.55111E-05 | 0.000197973 |
| PRDM9      | 0.206780917  | 7.55572E-05 | 0.000198068 |
| CT45A6     | 0.206721664  | 7.59247E-05 | 0.000198972 |
| TMPPE      | -0.206721457 | 7.5926E-05  | 0.000198972 |
| TRAPPC9    | 0.206720483  | 7.59321E-05 | 0.000198972 |
| WDR3       | -0.206701523 | 7.605E-05   | 0.000199255 |
| TRPM5      | 0.206653149  | 7.63517E-05 | 0.000200019 |
| NAA11      | 0.206632172  | 7.64829E-05 | 0.000200336 |
| C1orf113   | 0.206569787  | 7.68744E-05 | 0.000201335 |
| FAM175B    | -0.206546522 | 7.70208E-05 | 0.000201692 |
| NR1H2      | 0.206515453  | 7.72168E-05 | 0.000202179 |
| UBAC1      | 0.206504612  | 7.72853E-05 | 0.000202332 |
| GPR34      | -0.206481704 | 7.74302E-05 | 0.000202684 |
| KCNQ4      | -0.206471469 | 7.74951E-05 | 0.000202827 |
| PRKAB1     | 0.206436122  | 7.77194E-05 | 0.000203378 |
| ROR2       | -0.20643508  | 7.7726E-05  | 0.000203378 |
| DHX58      | -0.206384266 | 7.80495E-05 | 0.000204198 |
| TCTEX1D2   | 0.206373183  | 7.81203E-05 | 0.000204356 |
| HIST2H2AA3 | 0.206320509  | 7.84573E-05 | 0.000205211 |
| LEPREL1    | -0.206313527 | 7.85021E-05 | 0.000205282 |
| CALU       | -0.206313064 | 7.8505E-05  | 0.000205282 |
| LRRCC1     | -0.206301704 | 7.85779E-05 | 0.000205446 |
| YIPF5      | -0.206262742 | 7.88285E-05 | 0.000206074 |
| LOX        | -0.206260447 | 7.88433E-05 | 0.000206085 |
| ASCL2      | 0.206252079  | 7.88972E-05 | 0.000206199 |
| SEPP1      | -0.206226715 | 7.90608E-05 | 0.000206594 |
| MARK1      | -0.206225457 | 7.90689E-05 | 0.000206594 |
| ASRGL1     | 0.20621609   | 7.91294E-05 | 0.000206725 |
| ZNF280A    | 0.206210344  | 7.91666E-05 | 0.000206795 |
| PRDM13     | 0.2061659    | 7.94544E-05 | 0.000207519 |
| KCNK9      | 0.206145094  | 7.95895E-05 | 0.000207845 |
| PRKAR2B    | -0.206124469 | 7.97237E-05 | 0.000208168 |
| MAFK       | -0.206003415 | 8.05152E-05 | 0.000210207 |
| PRR5       | 0.205963609  | 8.07771E-05 | 0.000210863 |
| MLF2       | 0.205885774  | 8.12916E-05 | 0.000212178 |
| RASA3      | -0.205783365 | 8.19731E-05 | 0.000213929 |
| RBM20      | -0.205741498 | 8.22533E-05 | 0.000214632 |
| XRCC4      | 0.205738175  | 8.22756E-05 | 0.000214657 |
| DR1        | -0.205736898 | 8.22841E-05 | 0.000214657 |

|           |              |             |             |
|-----------|--------------|-------------|-------------|
| C2orf64   | 0.205714072  | 8.24373E-05 | 0.000215028 |
| NBPF7     | -0.20570359  | 8.25077E-05 | 0.000215184 |
| SHQ1      | -0.205697737 | 8.25471E-05 | 0.000215258 |
| LOC84989  | 0.205649857  | 8.28697E-05 | 0.000216071 |
| NLN       | -0.20564306  | 8.29156E-05 | 0.000216162 |
| SFTA1P    | 0.20559651   | 8.32305E-05 | 0.000216955 |
| PPP1R14D  | 0.205573434  | 8.33871E-05 | 0.000217335 |
| KCNIP1    | -0.205528579 | 8.36921E-05 | 0.000218101 |
| DDX18     | -0.205519096 | 8.37568E-05 | 0.000218241 |
| NR4A1     | -0.205513719 | 8.37934E-05 | 0.000218308 |
| SLC24A4   | -0.205414508 | 8.44727E-05 | 0.000220049 |
| RGS11     | -0.205363112 | 8.48267E-05 | 0.000220942 |
| TMEM180   | 0.205347141  | 8.49369E-05 | 0.0002212   |
| PSMD2     | 0.205344513  | 8.49551E-05 | 0.000221219 |
| FREM2     | -0.205334703 | 8.50229E-05 | 0.000221366 |
| WIZ       | -0.205316482 | 8.5149E-05  | 0.000221666 |
| DUT       | 0.205304426  | 8.52325E-05 | 0.000221854 |
| SAFB      | 0.205282091  | 8.53874E-05 | 0.000222228 |
| B4GALNT3  | -0.205254884 | 8.55765E-05 | 0.000222691 |
| NUP153    | -0.205213716 | 8.58634E-05 | 0.000223409 |
| HBSIL     | -0.20519346  | 8.60049E-05 | 0.000223747 |
| ARFGEF1   | -0.205190337 | 8.60267E-05 | 0.000223775 |
| MPPE1     | -0.205116635 | 8.65435E-05 | 0.00022509  |
| ITPKA     | 0.20509858   | 8.66705E-05 | 0.000225391 |
| TRIM9     | -0.205089955 | 8.67313E-05 | 0.000225519 |
| AK3L1     | 0.205067757  | 8.68878E-05 | 0.000225897 |
| GSTM5     | -0.205065666 | 8.69025E-05 | 0.000225906 |
| CAMTA1    | 0.205047837  | 8.70285E-05 | 0.000226204 |
| LAMB3     | -0.20499726  | 8.73867E-05 | 0.000227105 |
| DSTYK     | -0.204975165 | 8.75436E-05 | 0.000227483 |
| VPS45     | 0.204923711  | 8.791E-05   | 0.000228405 |
| CUL2      | -0.204789048 | 8.88759E-05 | 0.000230885 |
| GGT5      | -0.204772941 | 8.89921E-05 | 0.000231157 |
| GMEB2     | 0.204756562  | 8.91104E-05 | 0.000231434 |
| TBCCD1    | -0.204653939 | 8.9855E-05  | 0.000233337 |
| RAF1      | -0.204645302 | 8.99179E-05 | 0.00023347  |
| KIF2A     | -0.204639903 | 8.99573E-05 | 0.000233542 |
| DPP9      | -0.204558011 | 9.05563E-05 | 0.000235066 |
| C4orf49   | -0.204554339 | 9.05832E-05 | 0.000235106 |
| NBEAL2    | -0.204550432 | 9.06119E-05 | 0.000235149 |
| LOC148189 | -0.204497359 | 9.10024E-05 | 0.000236132 |
| TRIM7     | 0.204488526  | 9.10675E-05 | 0.00023627  |
| PKD1L1    | -0.204460877 | 9.12717E-05 | 0.000236769 |
| PID1      | -0.204456988 | 9.13004E-05 | 0.000236813 |
| ARPC2     | 0.204387978  | 9.1812E-05  | 0.000238106 |
| LOC285954 | -0.204386502 | 9.1823E-05  | 0.000238106 |

|           |              |             |             |
|-----------|--------------|-------------|-------------|
| FKRP      | -0.20438106  | 9.18635E-05 | 0.00023818  |
| DHX9      | -0.204367479 | 9.19645E-05 | 0.000238411 |
| EPB41L3   | -0.204349415 | 9.20991E-05 | 0.000238729 |
| NCAM1     | -0.20433037  | 9.22412E-05 | 0.000239066 |
| IL17REL   | -0.204321144 | 9.23101E-05 | 0.000239213 |
| ENKUR     | -0.204256645 | 9.27932E-05 | 0.000240434 |
| XPR1      | -0.2041911   | 9.32865E-05 | 0.000241681 |
| RSPH4A    | -0.204128156 | 9.37626E-05 | 0.000242883 |
| KIAA0895L | -0.204026464 | 9.45366E-05 | 0.000244856 |
| DHX35     | -0.204018843 | 9.45948E-05 | 0.000244975 |
| GMFB      | -0.203992195 | 9.47987E-05 | 0.000245471 |
| IL4I1     | 0.203942115  | 9.51831E-05 | 0.000246434 |
| C22orf26  | 0.203925201  | 9.53133E-05 | 0.000246739 |
| LEPR      | -0.203876191 | 9.56913E-05 | 0.000247686 |
| FLT3      | -0.203865054 | 9.57774E-05 | 0.000247876 |
| RAB39     | -0.203841452 | 9.59601E-05 | 0.000248317 |
| SLC44A2   | -0.20383075  | 9.60431E-05 | 0.000248499 |
| LRRC8B    | -0.203822527 | 9.61069E-05 | 0.000248632 |
| SSRP1     | 0.203788659  | 9.637E-05   | 0.00024928  |
| UBP1      | -0.203774921 | 9.6477E-05  | 0.000249525 |
| KCNK5     | -0.20376242  | 9.65744E-05 | 0.000249744 |
| MMP16     | -0.203746824 | 9.6696E-05  | 0.000250026 |
| FAM116A   | -0.20373268  | 9.68065E-05 | 0.000250279 |
| CPNE3     | -0.203662045 | 9.73598E-05 | 0.000251677 |
| CARD6     | -0.203634411 | 9.75771E-05 | 0.000252206 |
| PHLDA2    | 0.203631909  | 9.75968E-05 | 0.000252224 |
| C16orf86  | 0.203597878  | 9.78651E-05 | 0.000252885 |
| GGA1      | 0.203538318  | 9.83362E-05 | 0.000254069 |
| SIK1      | -0.203534757 | 9.83645E-05 | 0.000254109 |
| SYCE1L    | 0.203519839  | 9.84829E-05 | 0.000254382 |
| HIST1H2AE | 0.203516291  | 9.8511E-05  | 0.000254422 |
| PGPEP1    | 0.203475483  | 9.88356E-05 | 0.000255227 |
| PRTG      | -0.203460034 | 9.89588E-05 | 0.000255481 |
| RGS20     | 0.203458478  | 9.89712E-05 | 0.000255481 |
| MBTD1     | -0.203458312 | 9.89725E-05 | 0.000255481 |
| EPR1      | 0.203433939  | 9.91671E-05 | 0.00025595  |
| MAPK3     | 0.203431696  | 9.91851E-05 | 0.000255964 |
| SUMO4     | -0.203358389 | 9.97726E-05 | 0.000257447 |
| UPK3BL    | 0.203272745  | 0.000100463 | 0.000259195 |
| FAM27A    | 0.203268538  | 0.000100497 | 0.000259249 |
| BLVRB     | 0.20322047   | 0.000100887 | 0.000260221 |
| BAG1      | 0.203207897  | 0.000100989 | 0.000260451 |
| ZNF534    | 0.203204365  | 0.000101018 | 0.000260491 |
| G6PC      | -0.203191439 | 0.000101123 | 0.000260728 |
| STK38     | 0.203179868  | 0.000101217 | 0.000260938 |
| KIF3C     | -0.203103756 | 0.000101839 | 0.000262507 |



|           |              |             |             |
|-----------|--------------|-------------|-------------|
| LOC255167 | -0.203081129 | 0.000102025 | 0.000262951 |
| GALT      | 0.203072122  | 0.000102099 | 0.000263108 |
| INSIG2    | -0.203060882 | 0.000102191 | 0.000263312 |
| VASP      | 0.203053207  | 0.000102254 | 0.00026344  |
| COG8      | -0.203048304 | 0.000102294 | 0.00026351  |
| TMEM20    | -0.203035312 | 0.000102401 | 0.000263751 |
| XPO1      | -0.202989328 | 0.000102781 | 0.000264694 |
| TNFRSF10D | -0.202920944 | 0.000103348 | 0.000266119 |
| GM2A      | 0.202908564  | 0.00010345  | 0.00026635  |
| MYOZ1     | -0.202865461 | 0.000103809 | 0.000267213 |
| MGC16703  | -0.202865073 | 0.000103813 | 0.000267213 |
| HDAC6     | -0.202859592 | 0.000103858 | 0.000267297 |
| SLC25A20  | -0.202836875 | 0.000104048 | 0.00026775  |
| C21orf59  | 0.202823697  | 0.000104158 | 0.000267999 |
| RHBDD3    | 0.20281271   | 0.00010425  | 0.000268202 |
| SERTAD3   | 0.202804153  | 0.000104322 | 0.000268351 |
| RPL23AP32 | 0.202796529  | 0.000104386 | 0.000268481 |
| GAPT      | -0.202780037 | 0.000104524 | 0.000268802 |
| LYZL1     | 0.202748914  | 0.000104786 | 0.00026944  |
| ZSWIM4    | -0.202726802 | 0.000104972 | 0.000269884 |
| STEAP1    | 0.202705689  | 0.000105151 | 0.000270308 |
| PPAPDC1A  | -0.202693239 | 0.000105256 | 0.000270543 |
| CLEC2D    | 0.202681628  | 0.000105354 | 0.00027076  |
| FAM82B    | 0.202661897  | 0.000105521 | 0.000271155 |
| LOC642846 | 0.202658435  | 0.00010555  | 0.000271195 |
| WDR92     | -0.202644724 | 0.000105667 | 0.000271459 |
| MTPAP     | -0.202630436 | 0.000105788 | 0.000271735 |
| LOC84931  | 0.202593212  | 0.000106104 | 0.000272513 |
| NUDT22    | 0.20253235   | 0.000106624 | 0.000273812 |
| ZDHHC18   | 0.202523985  | 0.000106695 | 0.000273961 |
| SLCO1C1   | -0.202519741 | 0.000106732 | 0.000274019 |
| PHACTR3   | -0.20251167  | 0.000106801 | 0.000274161 |
| POMGNT1   | 0.202508677  | 0.000106827 | 0.000274191 |
| TOP1P2    | 0.202499435  | 0.000106906 | 0.000274359 |
| PDIA3     | 0.202476602  | 0.000107102 | 0.000274827 |
| GPC6      | -0.202447471 | 0.000107352 | 0.000275435 |
| RASL10B   | 0.202424801  | 0.000107548 | 0.0002759   |
| RABL2B    | -0.202394729 | 0.000107807 | 0.000276531 |
| BAP1      | 0.202390651  | 0.000107843 | 0.000276586 |
| FADD      | 0.202367912  | 0.000108039 | 0.000277055 |
| DENND2A   | -0.202351766 | 0.000108179 | 0.000277378 |
| FST       | 0.202334895  | 0.000108326 | 0.000277717 |
| CORT      | 0.202267884  | 0.000108909 | 0.000279177 |
| PCDHA13   | -0.202256934 | 0.000109005 | 0.000279386 |
| RRN3P3    | -0.202241038 | 0.000109144 | 0.000279706 |
| GPR44     | 0.202224108  | 0.000109292 | 0.000280038 |

|           |              |             |             |
|-----------|--------------|-------------|-------------|
| PARS2     | 0.202223019  | 0.000109301 | 0.000280038 |
| LOC400696 | 0.202181192  | 0.000109668 | 0.000280942 |
| STXBP2    | 0.202166102  | 0.000109801 | 0.000281246 |
| FAF2      | -0.202146708 | 0.000109972 | 0.000281647 |
| CCR1      | -0.20208965  | 0.000110475 | 0.0002829   |
| AIF1L     | -0.202082608 | 0.000110538 | 0.000283023 |
| GDF15     | 0.202074757  | 0.000110607 | 0.000283165 |
| RABGGTA   | 0.202056956  | 0.000110765 | 0.000283532 |
| AK1       | 0.202003286  | 0.000111242 | 0.000284716 |
| CCL15     | 0.201982492  | 0.000111427 | 0.000285154 |
| CYP27C1   | -0.201952617 | 0.000111694 | 0.000285765 |
| MYADML    | 0.201952527  | 0.000111694 | 0.000285765 |
| USF2      | 0.201902493  | 0.000112142 | 0.000286874 |
| GLYATL1   | -0.201863878 | 0.000112489 | 0.000287725 |
| CTAG2     | 0.201823417  | 0.000112854 | 0.00028862  |
| GOLGA8DP  | 0.20172733   | 0.000113724 | 0.000290809 |
| COQ6      | -0.201701767 | 0.000113957 | 0.000291366 |
| FUS       | 0.201675564  | 0.000114196 | 0.000291939 |
| PLEKHA2   | -0.201649775 | 0.000114431 | 0.000292504 |
| NQO1      | 0.201639424  | 0.000114526 | 0.000292708 |
| H2AFY2    | 0.201621493  | 0.00011469  | 0.00029309  |
| CHST15    | -0.2016149   | 0.00011475  | 0.000293207 |
| FPR2      | -0.201566252 | 0.000115197 | 0.000294311 |
| OTOA      | 0.201529064  | 0.00011554  | 0.000295148 |
| CEP152    | -0.201460393 | 0.000116175 | 0.000296733 |
| ANKRD29   | -0.201443775 | 0.000116329 | 0.000297088 |
| AGXT2L1   | -0.201438829 | 0.000116375 | 0.00029714  |
| SLC41A1   | -0.201438405 | 0.000116379 | 0.00029714  |
| PPA1      | 0.20135685   | 0.000117139 | 0.000299041 |
| LGI2      | -0.201348305 | 0.000117219 | 0.000299207 |
| RCAN3     | -0.201343941 | 0.00011726  | 0.000299273 |
| BAMBI     | 0.201328287  | 0.000117406 | 0.000299608 |
| AHNAK2    | -0.201307938 | 0.000117597 | 0.000300057 |
| FGFBP3    | 0.201305838  | 0.000117617 | 0.000300068 |
| EXTL2     | -0.201243654 | 0.000118201 | 0.000301522 |
| CEP57     | -0.201242016 | 0.000118217 | 0.000301522 |
| VTI1B     | 0.201236674  | 0.000118267 | 0.000301612 |
| UBE2MP1   | 0.201217725  | 0.000118446 | 0.000301991 |
| ARL2BP    | -0.201217712 | 0.000118446 | 0.000301991 |
| CLEC14A   | -0.201189762 | 0.00011871  | 0.000302626 |
| MEX3D     | -0.20113533  | 0.000119226 | 0.000303903 |
| BMS1      | 0.201133229  | 0.000119246 | 0.000303915 |
| CDKN2A    | 0.201121382  | 0.000119359 | 0.000304163 |
| DLX1      | 0.201101325  | 0.00011955  | 0.000304611 |
| PHB2      | 0.201098744  | 0.000119575 | 0.000304634 |
| P4HB      | 0.201082971  | 0.000119725 | 0.000304979 |

|           |              |             |             |
|-----------|--------------|-------------|-------------|
| TMEM176A  | 0.201076179  | 0.00011979  | 0.000305105 |
| F11       | -0.201041851 | 0.000120118 | 0.000305901 |
| LOC148709 | 0.200983582  | 0.000120677 | 0.000307285 |
| NOL4      | -0.200952544 | 0.000120975 | 0.000308006 |
| PDPN      | -0.200918405 | 0.000121304 | 0.000308805 |
| ICMT      | -0.200909293 | 0.000121393 | 0.000308989 |
| PAGE1     | 0.200900438  | 0.000121478 | 0.000309168 |
| SULT1C2   | 0.200898765  | 0.000121494 | 0.000309169 |
| NIPAL3    | -0.200840256 | 0.000122061 | 0.000310573 |
| HUNK      | -0.200776527 | 0.000122682 | 0.000312112 |
| DNAH1     | -0.20076821  | 0.000122763 | 0.000312278 |
| LPHN3     | -0.200718504 | 0.000123249 | 0.000313476 |
| FAM150B   | -0.200699216 | 0.000123439 | 0.000313917 |
| TPP1      | -0.200667274 | 0.000123753 | 0.000314675 |
| ZNF700    | -0.200645985 | 0.000123962 | 0.000315168 |
| RIBC2     | 0.200604779  | 0.000124369 | 0.000316156 |
| CDH9      | 0.200603386  | 0.000124383 | 0.000316156 |
| CATSPERG  | -0.200532311 | 0.000125087 | 0.000317907 |
| FUCA2     | 0.200432209  | 0.000126086 | 0.000320404 |
| CXorf66   | -0.200418589 | 0.000126223 | 0.00032071  |
| STYX      | -0.200380143 | 0.000126609 | 0.000321649 |
| GHRL      | 0.200368917  | 0.000126721 | 0.000321895 |
| CXADRP3   | -0.200322177 | 0.000127193 | 0.000323051 |
| KRTAP6-3  | 0.20030155   | 0.000127401 | 0.000323539 |
| BNIP3     | 0.200297411  | 0.000127443 | 0.000323604 |
| RHOQ      | -0.200292466 | 0.000127493 | 0.00032369  |
| SLC10A1   | -0.200269496 | 0.000127726 | 0.000324239 |
| TFIP11    | 0.200244615  | 0.000127978 | 0.000324838 |
| DOLK      | 0.200208249  | 0.000128348 | 0.000325735 |
| MGST3     | 0.200173777  | 0.000128699 | 0.000326586 |
| FAM149B1  | -0.200113956 | 0.000129311 | 0.000328097 |
| TSSK3     | -0.200095909 | 0.000129497 | 0.000328525 |
| HIST1H4E  | 0.200034888  | 0.000130125 | 0.000330076 |
| DOK6      | -0.199988036 | 0.000130609 | 0.000331262 |
| LOC344595 | -0.199951041 | 0.000130992 | 0.000332193 |
| BCAS1     | 0.199933257  | 0.000131177 | 0.000332619 |
| LOC100130 | -0.199895327 | 0.000131572 | 0.000333577 |
| LRRN3     | -0.199780686 | 0.000132772 | 0.000336577 |
| FGF14     | -0.19975331  | 0.00013306  | 0.000337264 |
| TDO2      | -0.199746948 | 0.000133127 | 0.000337391 |
| GTF2F1    | 0.199729848  | 0.000133307 | 0.000337805 |
| SUMO3     | 0.19972573   | 0.00013335  | 0.000337872 |
| CDK5R2    | 0.199655319  | 0.000134096 | 0.000339717 |
| LUC7L     | 0.199646434  | 0.00013419  | 0.000339912 |
| MGAT3     | -0.19962026  | 0.000134468 | 0.000340574 |
| KBTBD2    | -0.199531784 | 0.000135412 | 0.000342922 |

|           |              |             |             |
|-----------|--------------|-------------|-------------|
| C19orf44  | 0.199526647  | 0.000135467 | 0.000343017 |
| CKMT2     | -0.199477534 | 0.000135994 | 0.000344308 |
| PGM2L1    | -0.199422696 | 0.000136585 | 0.00034576  |
| PRPF38A   | 0.199372122  | 0.000137132 | 0.000347101 |
| VCX3B     | 0.199303304  | 0.00013788  | 0.000348948 |
| PIGO      | -0.199278978 | 0.000138145 | 0.000349575 |
| PRPF8     | -0.199256694 | 0.000138388 | 0.000350146 |
| ZNF100    | -0.199218954 | 0.000138801 | 0.000351147 |
| PHYHIPL   | 0.199192549  | 0.000139091 | 0.000351835 |
| GREM1     | -0.199143804 | 0.000139627 | 0.000353146 |
| RS1       | 0.199139602  | 0.000139673 | 0.000353219 |
| ZNF517    | 0.199089293  | 0.000140229 | 0.000354579 |
| CTSS      | -0.199073596 | 0.000140403 | 0.000354973 |
| C20orf197 | -0.199060583 | 0.000140547 | 0.000355293 |
| ABCA5     | -0.198952307 | 0.000141752 | 0.000358294 |
| POSTN     | -0.198896349 | 0.000142379 | 0.000359833 |
| COL5A2    | -0.198889035 | 0.000142461 | 0.000359995 |
| PSMD14    | 0.198882922  | 0.00014253  | 0.000360123 |
| DYRK2     | -0.198847494 | 0.000142929 | 0.000361084 |
| CCND1     | -0.198826486 | 0.000143165 | 0.000361636 |
| PDZD4     | -0.198813344 | 0.000143314 | 0.000361931 |
| AKTIP     | -0.198812344 | 0.000143325 | 0.000361931 |
| FRMD8     | -0.19881131  | 0.000143337 | 0.000361931 |
| LLGL1     | -0.198788223 | 0.000143598 | 0.000362544 |
| SART3     | -0.198759949 | 0.000143918 | 0.000363307 |
| C21orf2   | 0.198744805  | 0.00014409  | 0.000363694 |
| ADH1B     | -0.198740964 | 0.000144133 | 0.000363758 |
| HK1       | -0.198738143 | 0.000144165 | 0.000363793 |
| CD200R1   | -0.198654754 | 0.000145115 | 0.000366092 |
| ZNF618    | -0.198653712 | 0.000145127 | 0.000366092 |
| EEPDI     | -0.198653329 | 0.000145132 | 0.000366092 |
| EPOR      | -0.198602294 | 0.000145716 | 0.000367519 |
| NRIP2     | -0.198584258 | 0.000145923 | 0.000367995 |
| ARSK      | -0.198581706 | 0.000145952 | 0.000368022 |
| DNAL4     | 0.198579991  | 0.000145972 | 0.000368025 |
| PAOX      | 0.198565449  | 0.000146139 | 0.0003684   |
| EPS8L3    | 0.198551337  | 0.000146301 | 0.000368763 |
| ZMYND10   | 0.198540171  | 0.00014643  | 0.00036904  |
| STARD6    | 0.198519926  | 0.000146663 | 0.000369582 |
| ILVBL     | 0.198420362  | 0.000147817 | 0.000372431 |
| TMEM207   | 0.198419063  | 0.000147832 | 0.000372431 |
| ISG20L2   | -0.198370413 | 0.000148398 | 0.000373812 |
| GPR180    | -0.198291347 | 0.000149324 | 0.000376095 |
| DENND3    | -0.198280782 | 0.000149448 | 0.00037636  |
| RPRD2     | -0.198207305 | 0.000150313 | 0.000378491 |
| ARSD      | -0.198187298 | 0.00015055  | 0.000379038 |

|          |              |             |             |
|----------|--------------|-------------|-------------|
| MKNK2    | -0.19815221  | 0.000150965 | 0.000380037 |
| C2orf60  | -0.19814054  | 0.000151104 | 0.000380337 |
| LYPLAL1  | 0.19811095   | 0.000151455 | 0.00038117  |
| MTSS1    | -0.198109479 | 0.000151473 | 0.00038117  |
| C15orf21 | 0.198100617  | 0.000151578 | 0.000381387 |
| CYP2A13  | -0.198091392 | 0.000151688 | 0.000381615 |
| MMADHC   | -0.198076336 | 0.000151867 | 0.000382018 |
| MIF4GD   | 0.198023679  | 0.000152496 | 0.000383552 |
| ARHGAP18 | -0.198016718 | 0.00015258  | 0.000383713 |
| ZFP90    | -0.198001498 | 0.000152762 | 0.000384123 |
| RARA     | -0.197955017 | 0.00015332  | 0.000385478 |
| NCAPH    | 0.197947824  | 0.000153407 | 0.000385647 |
| IL17RD   | -0.197943782 | 0.000153456 | 0.000385721 |
| FCRL6    | -0.197933668 | 0.000153577 | 0.000385978 |
| NOC3L    | -0.197891781 | 0.000154083 | 0.0003872   |
| LAG3     | 0.197880555  | 0.000154219 | 0.000387492 |
| SFRS17A  | -0.197878227 | 0.000154247 | 0.000387514 |
| C2orf44  | 0.197826423  | 0.000154875 | 0.000389043 |
| CCDC7    | -0.197805128 | 0.000155134 | 0.000389644 |
| CCDC17   | 0.19776652   | 0.000155604 | 0.000390776 |
| RPS6KA3  | -0.197756205 | 0.00015573  | 0.000391042 |
| EHD4     | -0.197671775 | 0.000156764 | 0.000393589 |
| ATP6AP2  | -0.197666512 | 0.000156828 | 0.000393702 |
| GABRR3   | 0.19763917   | 0.000157165 | 0.000394496 |
| PLA2G12B | 0.197636718  | 0.000157195 | 0.000394522 |
| ACTL8    | 0.197557545  | 0.000158173 | 0.000396926 |
| TSC22D1  | -0.1975372   | 0.000158425 | 0.000397509 |
| LGALS8   | -0.197530514 | 0.000158508 | 0.000397667 |
| GDF1     | 0.197509448  | 0.00015877  | 0.000398274 |
| KLF2     | -0.197492186 | 0.000158984 | 0.000398762 |
| TFAP2E   | 0.197454045  | 0.00015946  | 0.000399904 |
| ANKRD13A | -0.197442833 | 0.0001596   | 0.000400205 |
| STC1     | -0.197416557 | 0.000159928 | 0.000400978 |
| C9orf86  | 0.197404168  | 0.000160083 | 0.000401317 |
| SYT7     | -0.197369166 | 0.000160522 | 0.000402367 |
| CLEC18C  | 0.197359598  | 0.000160643 | 0.000402617 |
| LHB      | 0.197348788  | 0.000160778 | 0.000402907 |
| HYDIN    | -0.197336454 | 0.000160934 | 0.000403196 |
| RBBP8    | -0.197336412 | 0.000160934 | 0.000403196 |
| ACPT     | 0.197259464  | 0.000161906 | 0.000405579 |
| IL4R     | -0.197225805 | 0.000162332 | 0.000406597 |
| SUZ12    | -0.197206281 | 0.00016258  | 0.000407167 |
| KIAA0528 | -0.197150748 | 0.000163288 | 0.000408886 |
| C1orf173 | -0.197146349 | 0.000163344 | 0.000408976 |
| CBWD1    | 0.197120211  | 0.000163678 | 0.00040976  |
| PARP15   | -0.196987537 | 0.000165383 | 0.000413977 |

|           |              |             |             |
|-----------|--------------|-------------|-------------|
| PNRC1     | -0.196975499 | 0.000165539 | 0.000414315 |
| SERAC1    | -0.196862414 | 0.000167007 | 0.000417936 |
| CFTR      | -0.196826696 | 0.000167473 | 0.00041905  |
| CCL3L1    | 0.19681881   | 0.000167576 | 0.000419255 |
| SPAG5     | 0.19681616   | 0.00016761  | 0.000419289 |
| CHRN4     | -0.19681419  | 0.000167636 | 0.000419301 |
| ZCCHC16   | -0.196783733 | 0.000168035 | 0.000420246 |
| CTTNBP2   | -0.196771664 | 0.000168193 | 0.000420589 |
| CNKSR2    | -0.196768626 | 0.000168233 | 0.000420636 |
| CSPG4     | -0.196765746 | 0.000168271 | 0.000420677 |
| CENPT     | 0.196760481  | 0.00016834  | 0.000420797 |
| LRRC7     | -0.196752545 | 0.000168444 | 0.000421005 |
| SRD5A2    | -0.19674377  | 0.00016856  | 0.000421241 |
| LRRC19    | -0.196701676 | 0.000169114 | 0.000422573 |
| USP7      | -0.196697228 | 0.000169173 | 0.000422666 |
| CLIC3     | 0.196667386  | 0.000169567 | 0.000423598 |
| ZFP112    | -0.196661225 | 0.000169648 | 0.000423748 |
| WFDC10A   | 0.196623688  | 0.000170145 | 0.000424937 |
| ADCY7     | -0.196590641 | 0.000170584 | 0.000425979 |
| SPATA9    | -0.196564839 | 0.000170928 | 0.000426783 |
| RPRML     | 0.196536243  | 0.000171309 | 0.000427682 |
| C5orf44   | -0.196530898 | 0.00017138  | 0.000427806 |
| C10orf41  | 0.196510979  | 0.000171647 | 0.000428417 |
| SLC6A17   | -0.196478564 | 0.000172081 | 0.000429447 |
| SND1      | 0.196452181  | 0.000172435 | 0.000430276 |
| ROPN1     | -0.196393874 | 0.000173219 | 0.00043218  |
| KRTDAP    | 0.196386577  | 0.000173318 | 0.000432318 |
| ZNF385B   | -0.196386558 | 0.000173318 | 0.000432318 |
| AGFG1     | -0.196383352 | 0.000173361 | 0.000432372 |
| PDIA5     | -0.196344338 | 0.000173889 | 0.000433633 |
| C3orf54   | 0.196336285  | 0.000173998 | 0.00043385  |
| LOXL2     | -0.196331383 | 0.000174064 | 0.000433962 |
| FAM86C    | 0.196317709  | 0.000174249 | 0.000434369 |
| NXN       | -0.196306036 | 0.000174408 | 0.00043471  |
| ERAP1     | -0.196303616 | 0.000174441 | 0.000434737 |
| MTERF     | -0.196277019 | 0.000174802 | 0.000435584 |
| TTL5      | -0.196260097 | 0.000175032 | 0.000436103 |
| DNASE1L2  | 0.196229295  | 0.000175452 | 0.000437095 |
| WDR61     | 0.196223274  | 0.000175535 | 0.000437194 |
| C1orf66   | 0.196223174  | 0.000175536 | 0.000437194 |
| LOC162632 | -0.196202698 | 0.000175816 | 0.000437836 |
| LYPD2     | -0.196190993 | 0.000175976 | 0.00043818  |
| ZNF429    | -0.196162726 | 0.000176363 | 0.00043909  |
| MSI1      | 0.196107032  | 0.000177129 | 0.00044094  |
| C3orf19   | 0.196101095  | 0.000177211 | 0.000441089 |
| ATP10A    | -0.196084542 | 0.000177439 | 0.000441602 |

|           |              |             |             |
|-----------|--------------|-------------|-------------|
| FKBP9     | -0.196043045 | 0.000178012 | 0.000442973 |
| PODNL1    | -0.196024271 | 0.000178272 | 0.000443562 |
| TEX9      | -0.196022732 | 0.000178294 | 0.000443562 |
| EPX       | -0.196017779 | 0.000178362 | 0.000443678 |
| ALOX12P2  | -0.195978014 | 0.000178914 | 0.000444995 |
| TNFAIP8L2 | 0.195975118  | 0.000178954 | 0.00044504  |
| SLC5A1    | -0.195938333 | 0.000179467 | 0.000446258 |
| ADCY1     | -0.195914757 | 0.000179796 | 0.00044702  |
| APH1A     | 0.195881211  | 0.000180265 | 0.000448095 |
| GBP3      | -0.195880614 | 0.000180273 | 0.000448095 |
| TMED5     | -0.195804886 | 0.000181336 | 0.000450682 |
| OCLN      | -0.195791334 | 0.000181527 | 0.0004511   |
| FYB       | -0.195762308 | 0.000181937 | 0.000452061 |
| NLGN4X    | -0.195687759 | 0.000182992 | 0.000454628 |
| EHD2      | -0.195642565 | 0.000183635 | 0.000456168 |
| LRRC28    | 0.195631953  | 0.000183786 | 0.000456484 |
| ISM1      | -0.195630424 | 0.000183808 | 0.000456484 |
| CAPG      | 0.19561995   | 0.000183958 | 0.000456798 |
| TMEM145   | 0.195577277  | 0.000184568 | 0.000458255 |
| ZNF570    | -0.19554897  | 0.000184973 | 0.000459205 |
| FAM55B    | -0.195544533 | 0.000185037 | 0.000459305 |
| ADAMTS8   | -0.19552102  | 0.000185374 | 0.000460019 |
| CXADR     | -0.195520409 | 0.000185383 | 0.000460019 |
| SMPX      | 0.195519692  | 0.000185393 | 0.000460019 |
| FLJ25363  | 0.195517667  | 0.000185423 | 0.000460034 |
| TNPO2     | -0.195514872 | 0.000185463 | 0.000460076 |
| RPE       | -0.195476672 | 0.000186013 | 0.000461383 |
| INMT      | -0.195443217 | 0.000186496 | 0.000462523 |
| PPP1R2P1  | -0.195400657 | 0.000187112 | 0.000463994 |
| PXMP4     | 0.195379042  | 0.000187425 | 0.000464702 |
| SECISBP2  | -0.195377742 | 0.000187444 | 0.000464702 |
| MYST2     | -0.195363263 | 0.000187655 | 0.000465166 |
| GBP1      | -0.195296043 | 0.000188634 | 0.000467536 |
| C9orf82   | -0.195259045 | 0.000189176 | 0.000468819 |
| TMTC4     | -0.195253427 | 0.000189258 | 0.000468965 |
| CMYA5     | -0.195224646 | 0.00018968  | 0.000469952 |
| ZNF70     | -0.19521439  | 0.000189831 | 0.000470267 |
| DUSP10    | -0.195209079 | 0.000189909 | 0.000470402 |
| FEV       | 0.195197879  | 0.000190073 | 0.000470752 |
| GREM2     | -0.195191587 | 0.000190166 | 0.000470922 |
| P2RX2     | -0.195182586 | 0.000190299 | 0.000471141 |
| RNF170    | -0.195182365 | 0.000190302 | 0.000471141 |
| RARRES2   | 0.195159797  | 0.000190635 | 0.000471906 |
| CNKSR3    | -0.195113079 | 0.000191325 | 0.000473557 |
| CENPBD1   | 0.19508561   | 0.000191732 | 0.000474505 |
| CD55      | -0.195071734 | 0.000191938 | 0.000474956 |

|           |              |             |             |
|-----------|--------------|-------------|-------------|
| IMPA2     | 0.19506796   | 0.000191994 | 0.000475035 |
| PPT1      | 0.195042186  | 0.000192377 | 0.000475924 |
| CLEC7A    | -0.195035344 | 0.000192479 | 0.000476117 |
| KCTD7     | -0.195024241 | 0.000192644 | 0.000476467 |
| NCRNA0017 | 0.19498129   | 0.000193285 | 0.000477993 |
| FAM3B     | 0.194967446  | 0.000193492 | 0.000478445 |
| PHLDB1    | -0.194906706 | 0.000194403 | 0.000480637 |
| NCRNA0009 | -0.194824849 | 0.000195637 | 0.000483628 |
| MEP1B     | -0.19475241  | 0.000196734 | 0.000486281 |
| SPDYE5    | -0.19474608  | 0.000196831 | 0.000486458 |
| TPM2      | 0.194692393  | 0.000197648 | 0.000488419 |
| C1orf128  | 0.194668003  | 0.000198021 | 0.000489279 |
| FAM91A1   | -0.194649951 | 0.000198297 | 0.0004899   |
| DNAJC10   | -0.194589806 | 0.00019922  | 0.000492119 |
| PMS2L4    | 0.194581162  | 0.000199353 | 0.000492386 |
| TMCO6     | 0.194565639  | 0.000199592 | 0.000492915 |
| KCNJ16    | -0.194515426 | 0.000200366 | 0.000494767 |
| PTPRN     | 0.194493437  | 0.000200707 | 0.000495546 |
| GPHN      | -0.194474456 | 0.000201001 | 0.00049621  |
| USP44     | -0.194439812 | 0.000201538 | 0.000497476 |
| SNX5      | 0.194434278  | 0.000201624 | 0.000497627 |
| MAGED1    | 0.194366045  | 0.000202688 | 0.000500189 |
| PLP2      | 0.194266488  | 0.000204249 | 0.00050398  |
| SFPQ      | 0.194254884  | 0.000204432 | 0.000504368 |
| CFL2      | -0.194234761 | 0.000204749 | 0.000505088 |
| ENOX2     | -0.194228598 | 0.000204846 | 0.000505265 |
| PRKD2     | 0.194221174  | 0.000204963 | 0.000505491 |
| MMP1      | 0.194208456  | 0.000205164 | 0.000505924 |
| CANT1     | 0.194194422  | 0.000205386 | 0.000506409 |
| CNTLN     | -0.194189732 | 0.00020546  | 0.000506529 |
| RERE      | -0.194172404 | 0.000205735 | 0.000507143 |
| RAPGEF3   | -0.194169975 | 0.000205773 | 0.000507175 |
| CRELD1    | 0.194085892  | 0.00020711  | 0.000510406 |
| ALX1      | 0.194046095  | 0.000207745 | 0.000511908 |
| FAM3C     | -0.194037672 | 0.00020788  | 0.000512177 |
| NMUR1     | -0.193994017 | 0.000208579 | 0.000513837 |
| STAP2     | 0.193915336  | 0.000209846 | 0.000516892 |
| CATSPER3  | 0.193907765  | 0.000209968 | 0.00051713  |
| C18orf19  | -0.193902593 | 0.000210051 | 0.000517271 |
| CAPS      | 0.193880801  | 0.000210404 | 0.000518075 |
| UBE2R2    | 0.19386956   | 0.000210586 | 0.000518459 |
| C20orf96  | 0.193859683  | 0.000210746 | 0.00051875  |
| CPAMD8    | -0.193859044 | 0.000210756 | 0.00051875  |
| DKFZP434K | -0.193818855 | 0.000211408 | 0.000520291 |
| TIMP2     | -0.193767106 | 0.000212251 | 0.0005223   |
| BBS9      | -0.193724918 | 0.00021294  | 0.000523932 |



|           |              |             |             |
|-----------|--------------|-------------|-------------|
| CEBPD     | 0.193705779  | 0.000213254 | 0.000524638 |
| TUT1      | 0.193702557  | 0.000213306 | 0.000524703 |
| C20orf160 | -0.193698198 | 0.000213378 | 0.000524814 |
| PRDM16    | -0.193658693 | 0.000214026 | 0.000526344 |
| FBXO6     | 0.193622405  | 0.000214624 | 0.000527748 |
| ACSBG1    | -0.193575795 | 0.000215393 | 0.000529492 |
| LOC100131 | -0.193574834 | 0.000215409 | 0.000529492 |
| CAPN13    | -0.193574621 | 0.000215413 | 0.000529492 |
| OR2A1     | -0.193542244 | 0.000215949 | 0.000530744 |
| EGLN1     | -0.193513791 | 0.000216421 | 0.000531839 |
| CCNDBP1   | -0.19349981  | 0.000216653 | 0.000532345 |
| WWC3      | -0.193447754 | 0.000217521 | 0.00053441  |
| DKK1      | 0.193432495  | 0.000217776 | 0.00053497  |
| EMB       | -0.193407056 | 0.000218201 | 0.000535949 |
| KLC4      | 0.193401692  | 0.000218291 | 0.000536103 |
| RAMP3     | -0.193324685 | 0.000219584 | 0.000539213 |
| BUB3      | 0.193309564  | 0.000219839 | 0.000539772 |
| CBWD6     | 0.193304316  | 0.000219927 | 0.000539923 |
| TSPAN14   | -0.193299108 | 0.000220015 | 0.000540072 |
| CHAF1A    | 0.193234274  | 0.000221111 | 0.000542696 |
| BCAR1     | -0.193193974 | 0.000221795 | 0.000544308 |
| DCP1A     | -0.193189759 | 0.000221867 | 0.000544414 |
| MXD1      | -0.193188221 | 0.000221893 | 0.000544414 |
| MRC2      | -0.193185386 | 0.000221941 | 0.000544465 |
| C1orf103  | -0.193172634 | 0.000222158 | 0.00054493  |
| C20orf106 | 0.193112616  | 0.000223182 | 0.000547374 |
| CSTF3     | 0.193109766  | 0.000223231 | 0.000547426 |
| FMN1      | -0.193081703 | 0.000223712 | 0.000548537 |
| CD69      | -0.193071185 | 0.000223892 | 0.000548911 |
| C17orf68  | -0.193044352 | 0.000224352 | 0.000549973 |
| RNF44     | -0.193012936 | 0.000224893 | 0.00055123  |
| AS3MT     | 0.193008315  | 0.000224972 | 0.000551357 |
| FAM66A    | -0.192974473 | 0.000225556 | 0.000552719 |
| IL17RE    | 0.192956768  | 0.000225862 | 0.000553401 |
| TM7SF2    | 0.192918298  | 0.000226528 | 0.000554964 |
| CTGF      | -0.19291304  | 0.000226619 | 0.000555119 |
| LOC415056 | -0.19291057  | 0.000226662 | 0.000555156 |
| NDRG3     | 0.192862094  | 0.000227504 | 0.000557151 |
| ZNF263    | 0.192859424  | 0.000227551 | 0.000557196 |
| ADRA2A    | -0.192857307 | 0.000227588 | 0.000557218 |
| SAMD14    | -0.192796946 | 0.000228641 | 0.000559728 |
| ZNF44     | -0.192757408 | 0.000229333 | 0.000561354 |
| TYROBP    | 0.192746621  | 0.000229523 | 0.000561748 |
| BLVRA     | 0.192721086  | 0.000229971 | 0.000562777 |
| C8orf77   | 0.192705259  | 0.00023025  | 0.000563389 |
| RASL11B   | -0.192671074 | 0.000230852 | 0.000564794 |

|           |              |             |             |
|-----------|--------------|-------------|-------------|
| PSPH      | 0.192575698  | 0.000232541 | 0.000568855 |
| AUH       | -0.192559953 | 0.000232821 | 0.00056947  |
| EXT2      | -0.192541283 | 0.000233153 | 0.000570213 |
| REEP4     | 0.192519733  | 0.000233537 | 0.000571082 |
| CCDC159   | 0.192501152  | 0.000233869 | 0.000571823 |
| RBM19     | 0.192483363  | 0.000234187 | 0.00057253  |
| SCUBE3    | -0.192407908 | 0.00023554  | 0.000575767 |
| NPHP4     | -0.192396854 | 0.000235739 | 0.000576183 |
| FGF2      | -0.192381622 | 0.000236013 | 0.000576782 |
| SLC8A3    | -0.192371823 | 0.00023619  | 0.000577143 |
| NEURL3    | 0.192337074  | 0.000236817 | 0.000578604 |
| HSP90B1   | 0.192333141  | 0.000236888 | 0.000578707 |
| LOC283392 | -0.192313636 | 0.000237241 | 0.000579498 |
| P2RY13    | -0.192290261 | 0.000237664 | 0.000580461 |
| EXOC3L    | -0.192275538 | 0.000237931 | 0.000581042 |
| PLCG1     | -0.192187916 | 0.000239527 | 0.000584832 |
| TAS2R3    | -0.192187088 | 0.000239542 | 0.000584832 |
| ELOVL1    | 0.192177879  | 0.00023971  | 0.000585171 |
| CTSK      | -0.192155044 | 0.000240128 | 0.000586119 |
| CUBN      | -0.192093765 | 0.000241252 | 0.000588791 |
| PPIAL4D   | 0.192059675  | 0.00024188  | 0.00059025  |
| CTXN2     | 0.192030401  | 0.00024242  | 0.000591496 |
| ODZ2      | -0.192025166 | 0.000242516 | 0.000591659 |
| LRRC23    | 0.191988473  | 0.000243195 | 0.000593243 |
| NPEPL1    | 0.191975488  | 0.000243436 | 0.000593757 |
| XKR6      | -0.191955369 | 0.000243809 | 0.000594595 |
| CMTM4     | -0.191941611 | 0.000244065 | 0.000595146 |
| BCL10     | -0.191915452 | 0.000244552 | 0.000596259 |
| ANXA8     | -0.191912609 | 0.000244605 | 0.000596315 |
| COX11     | 0.191904743  | 0.000244751 | 0.0005966   |
| SIM1      | -0.19189735  | 0.000244889 | 0.000596851 |
| CYP2C19   | -0.191896006 | 0.000244914 | 0.000596851 |
| EFTUD1    | -0.191894237 | 0.000244947 | 0.000596858 |
| DNAJB13   | 0.191824318  | 0.000246254 | 0.00059997  |
| CORO7     | 0.191785032  | 0.000246992 | 0.000601693 |
| GPR31     | -0.191712008 | 0.000248368 | 0.000604971 |
| CLDN23    | -0.19168072  | 0.00024896  | 0.000606339 |
| IMPG2     | -0.19156008  | 0.000251254 | 0.000611851 |
| APITD1    | 0.191554015  | 0.00025137  | 0.000612059 |
| PRKAR1A   | -0.1915386   | 0.000251664 | 0.000612701 |
| NUSAP1    | 0.191520326  | 0.000252014 | 0.000613478 |
| AGPAT3    | -0.191451032 | 0.000253345 | 0.000616641 |
| FAM194A   | 0.191439047  | 0.000253575 | 0.000617127 |
| GGPS1     | 0.191395499  | 0.000254416 | 0.000619097 |
| TNFAIP8L1 | -0.191341186 | 0.000255467 | 0.000621579 |
| MKI67     | 0.191322653  | 0.000255827 | 0.000622379 |

|           |              |             |             |
|-----------|--------------|-------------|-------------|
| ESAM      | -0.191282417 | 0.000256609 | 0.000624206 |
| CDK2      | -0.191263713 | 0.000256974 | 0.000625017 |
| REEP3     | -0.191229536 | 0.000257641 | 0.000626564 |
| FABP1     | 0.191190606  | 0.000258404 | 0.00062834  |
| MOGS      | 0.191181861  | 0.000258575 | 0.000628681 |
| ESM1      | 0.191165236  | 0.000258901 | 0.000629397 |
| CGN       | -0.191141182 | 0.000259374 | 0.00063047  |
| MOGAT1    | -0.191119953 | 0.000259792 | 0.000631409 |
| C1QTNF2   | -0.191039614 | 0.00026138  | 0.000635158 |
| C9orf93   | -0.191038668 | 0.000261399 | 0.000635158 |
| FAM49B    | 0.19103573   | 0.000261457 | 0.000635222 |
| NHSL1     | -0.191027185 | 0.000261626 | 0.000635556 |
| PAK2      | -0.190986046 | 0.000262443 | 0.000637463 |
| ANKRD16   | 0.190965289  | 0.000262857 | 0.000638389 |
| LOC145783 | 0.190875863  | 0.000264644 | 0.000642651 |
| KIF18A    | 0.190833727  | 0.00026549  | 0.000644627 |
| ATP6V1C1  | 0.190770333  | 0.000266767 | 0.00064765  |
| LRCH2     | -0.190728613 | 0.000267611 | 0.000649567 |
| LOC26102  | 0.190728063  | 0.000267622 | 0.000649567 |
| FGR       | -0.19071707  | 0.000267845 | 0.000650029 |
| C21orf63  | -0.19068614  | 0.000268473 | 0.000651473 |
| UBE4B     | -0.190677804 | 0.000268642 | 0.000651804 |
| OSTM1     | -0.190617976 | 0.000269861 | 0.000654682 |
| COL9A2    | 0.190609327  | 0.000270038 | 0.000655031 |
| HHLA3     | 0.190572305  | 0.000270795 | 0.000656788 |
| FAM135B   | -0.190569015 | 0.000270862 | 0.000656871 |
| SPARCL1   | -0.190545158 | 0.000271352 | 0.000657977 |
| DNAH7     | -0.190538242 | 0.000271494 | 0.000658241 |
| C12orf12  | 0.190510376  | 0.000272066 | 0.000659484 |
| ATP1A2    | -0.190510076 | 0.000272072 | 0.000659484 |
| TP53I11   | -0.190486739 | 0.000272553 | 0.000660568 |
| PAQR9     | 0.19048223   | 0.000272646 | 0.000660713 |
| S100A2    | 0.190478441  | 0.000272724 | 0.000660806 |
| F2RL2     | -0.190476158 | 0.000272771 | 0.000660806 |
| PRODH2    | 0.190475553  | 0.000272783 | 0.000660806 |
| HIGD1A    | -0.190442289 | 0.00027347  | 0.000662389 |
| MURC      | -0.19043256  | 0.000273671 | 0.000662795 |
| GPR142    | -0.190416694 | 0.000274    | 0.000663442 |
| SECTM1    | 0.190416442  | 0.000274005 | 0.000663442 |
| CNRIP1    | -0.190396168 | 0.000274425 | 0.000664379 |
| AP3S2     | -0.190385333 | 0.00027465  | 0.000664842 |
| GPR56     | -0.190383197 | 0.000274694 | 0.000664868 |
| ZNF575    | 0.190342515  | 0.00027554  | 0.000666834 |
| HMGB1     | 0.190307634  | 0.000276267 | 0.000668512 |
| DBC1      | -0.190297654 | 0.000276475 | 0.000668935 |
| IFIT3     | -0.190243059 | 0.000277618 | 0.000671617 |

|           |              |             |             |
|-----------|--------------|-------------|-------------|
| CNOT4     | -0.19019525  | 0.000278622 | 0.000673964 |
| PBLD      | -0.190189641 | 0.00027874  | 0.000674168 |
| KIAA1239  | -0.190179749 | 0.000278948 | 0.00067459  |
| SERP1     | 0.190176005  | 0.000279027 | 0.000674692 |
| ADAR      | -0.190174527 | 0.000279058 | 0.000674692 |
| SCN3A     | -0.190135637 | 0.000279878 | 0.000676593 |
| GRAP2     | -0.19012065  | 0.000280195 | 0.000677276 |
| ARHGAP39  | 0.190088143  | 0.000280883 | 0.000678857 |
| PTGER4    | -0.190069835 | 0.000281271 | 0.000679692 |
| ZNF707    | 0.190068631  | 0.000281297 | 0.000679692 |
| GLT8D1    | 0.190037309  | 0.000281962 | 0.000681218 |
| PYGM      | -0.189993802 | 0.000282889 | 0.000683374 |
| LAMA1     | -0.189934638 | 0.000284154 | 0.000686346 |
| ADAMTS5   | -0.18992957  | 0.000284262 | 0.000686525 |
| NCK2      | -0.189845847 | 0.000286062 | 0.000690788 |
| GRID1     | -0.189811026 | 0.000286814 | 0.000692519 |
| FBXL18    | 0.189792946  | 0.000287205 | 0.000693379 |
| LARP6     | -0.189790655 | 0.000287254 | 0.000693414 |
| LOC285830 | 0.189772286  | 0.000287652 | 0.00069429  |
| SLC3A1    | -0.189740379 | 0.000288344 | 0.000695877 |
| RAB11FIP4 | 0.189735146  | 0.000288458 | 0.000696067 |
| HABP4     | 0.189732495  | 0.000288515 | 0.000696121 |
| KDM4D     | -0.189730271 | 0.000288564 | 0.000696153 |
| DGKE      | -0.189727015 | 0.000288635 | 0.00069624  |
| PYCR1     | 0.189724968  | 0.000288679 | 0.000696263 |
| C3orf17   | -0.189672389 | 0.000289824 | 0.00069894  |
| KCNC3     | -0.189656454 | 0.000290172 | 0.000699695 |
| MMS19     | 0.189614289  | 0.000291095 | 0.000701834 |
| TPM3      | 0.189601777  | 0.000291369 | 0.000702411 |
| ELL       | -0.189571103 | 0.000292042 | 0.000703949 |
| LRP2BP    | -0.189527354 | 0.000293005 | 0.000706185 |
| HELLS     | 0.18945131   | 0.000294686 | 0.00071015  |
| CAMK1G    | -0.189433682 | 0.000295077 | 0.000711006 |
| LOC100270 | 0.189423678  | 0.000295299 | 0.000711455 |
| HEXA      | 0.189395343  | 0.000295929 | 0.000712886 |
| CNOT3     | 0.189393601  | 0.000295968 | 0.000712893 |
| ZNF253    | -0.189381973 | 0.000296227 | 0.00071343  |
| DBNDD2    | 0.189379944  | 0.000296272 | 0.000713453 |
| FUBP1     | -0.189363613 | 0.000296636 | 0.000714243 |
| FANCB     | 0.18933474   | 0.000297281 | 0.000715709 |
| SRCRB4D   | 0.189316104  | 0.000297697 | 0.000716625 |
| ZNF69     | 0.189291184  | 0.000298255 | 0.000717882 |
| PDXK      | 0.18928504   | 0.000298393 | 0.000718126 |
| GPX8      | -0.189268282 | 0.000298769 | 0.000718944 |
| INSIG1    | -0.189237732 | 0.000299456 | 0.00072051  |
| PRSS50    | 0.189226079  | 0.000299718 | 0.000721053 |

|           |              |             |             |
|-----------|--------------|-------------|-------------|
| SGOL1     | 0.189216657  | 0.00029993  | 0.000721477 |
| ERICH1    | -0.189173784 | 0.000300897 | 0.000723717 |
| CNFN      | 0.18914286   | 0.000301597 | 0.000725312 |
| ADAM20    | -0.189120173 | 0.000302111 | 0.000726461 |
| KIAA1009  | -0.189028159 | 0.000304205 | 0.000731332 |
| CPNE9     | 0.189027926  | 0.000304211 | 0.000731332 |
| ZNF238    | -0.18898764  | 0.000305132 | 0.000733458 |
| APOL3     | -0.188944585 | 0.000306119 | 0.000735742 |
| KIAA0087  | -0.188908545 | 0.000306948 | 0.000737645 |
| COG2      | 0.188903822  | 0.000307056 | 0.000737817 |
| PANX1     | -0.188806759 | 0.000309299 | 0.000743117 |
| GJA9      | 0.1887686    | 0.000310185 | 0.000745155 |
| UCA1      | -0.18874085  | 0.000310831 | 0.000746617 |
| COL29A1   | -0.188687766 | 0.00031207  | 0.000749502 |
| TSPAN5    | -0.18861533  | 0.000313768 | 0.000753489 |
| WWC1      | -0.188597312 | 0.000314191 | 0.000754415 |
| ARHGEF18  | -0.188540286 | 0.000315536 | 0.000757552 |
| FBXL16    | -0.188528112 | 0.000315823 | 0.000758151 |
| GRIPAP1   | -0.188516165 | 0.000316106 | 0.000758738 |
| LOC100134 | 0.188492328  | 0.00031667  | 0.000760002 |
| PYGL      | -0.188487325 | 0.000316789 | 0.000760195 |
| TUG1      | -0.188464498 | 0.000317331 | 0.000761403 |
| POM121L10 | 0.188457416  | 0.000317499 | 0.000761714 |
| TFDP1     | -0.188429188 | 0.00031817  | 0.000763233 |
| NR1I2     | -0.188309019 | 0.000321043 | 0.000770032 |
| EFR3B     | -0.188254233 | 0.000322361 | 0.000773099 |
| CD79B     | 0.188206748  | 0.000323507 | 0.000775755 |
| TUBAL3    | 0.188198021  | 0.000323718 | 0.000776167 |
| CYP3A43   | -0.188194265 | 0.000323809 | 0.000776292 |
| TRPS1     | -0.188189399 | 0.000323927 | 0.000776472 |
| METT5D1   | -0.188187943 | 0.000323962 | 0.000776472 |
| TRIP6     | 0.188082665  | 0.00032652  | 0.000782509 |
| SLC25A14  | 0.188031976  | 0.000327758 | 0.000785382 |
| CLDN19    | 0.187937937  | 0.000330067 | 0.00079082  |
| DSEL      | -0.18790698  | 0.000330831 | 0.000792554 |
| ZNF37B    | -0.187897515 | 0.000331065 | 0.000793018 |
| FCGRT     | 0.187831491  | 0.000332699 | 0.000796838 |
| C5orf48   | 0.187789212  | 0.00033375  | 0.000799259 |
| LOC285359 | 0.187755252  | 0.000334597 | 0.000801189 |
| RINT1     | -0.187737498 | 0.00033504  | 0.000802154 |
| CYP39A1   | -0.18769093  | 0.000336205 | 0.000804847 |
| GRHL1     | -0.187564898 | 0.000339377 | 0.000812344 |
| ASB16     | -0.187553542 | 0.000339665 | 0.000812933 |
| C21orf34  | -0.187503863 | 0.000340924 | 0.000815849 |
| FLJ36777  | 0.187490191  | 0.000341271 | 0.000816582 |
| PDCD1LG2  | -0.187460854 | 0.000342017 | 0.000818214 |

|           |              |             |             |
|-----------|--------------|-------------|-------------|
| ACTA1     | 0.187460154  | 0.000342035 | 0.000818214 |
| CNIH2     | 0.187455312  | 0.000342158 | 0.000818321 |
| ELP4      | 0.187455161  | 0.000342162 | 0.000818321 |
| CYP8B1    | -0.187413747 | 0.000343219 | 0.000820749 |
| RAB32     | 0.187399656  | 0.000343579 | 0.000821512 |
| WIPF1     | -0.187376043 | 0.000344183 | 0.000822809 |
| SMTNL1    | -0.187375234 | 0.000344204 | 0.000822809 |
| PNRC2     | -0.18736758  | 0.0003444   | 0.000823179 |
| IGSF9     | -0.187365283 | 0.000344459 | 0.000823221 |
| PMPCA     | 0.187355016  | 0.000344722 | 0.000823751 |
| CCNE1     | 0.187334993  | 0.000345236 | 0.000824881 |
| EDN2      | -0.187280559 | 0.000346637 | 0.000828128 |
| MMP9      | 0.187270952  | 0.000346885 | 0.000828621 |
| TBC1D3B   | 0.187254467  | 0.000347311 | 0.000829538 |
| TAF4      | -0.187231589 | 0.000347902 | 0.000830851 |
| CKMT1B    | 0.187229662  | 0.000347952 | 0.000830871 |
| AVL9      | -0.187196905 | 0.0003488   | 0.000832797 |
| HIST2H2BF | -0.187187728 | 0.000349039 | 0.000833258 |
| SLC12A2   | -0.187186237 | 0.000349077 | 0.000833258 |
| NCBP2     | 0.187180602  | 0.000349223 | 0.000833507 |
| NUP93     | 0.18717184   | 0.000349451 | 0.000833951 |
| FAM99A    | -0.187156035 | 0.000349862 | 0.000834831 |
| HORMAD2   | -0.187151714 | 0.000349974 | 0.000834999 |
| ARSE      | 0.187145416  | 0.000350138 | 0.00083529  |
| AP3M2     | -0.187117051 | 0.000350877 | 0.000836953 |
| GPR171    | -0.187076577 | 0.000351934 | 0.000839373 |
| TOP3A     | -0.187069204 | 0.000352127 | 0.000839733 |
| GPRC6A    | 0.186976899  | 0.00035455  | 0.00084541  |
| KIAA1024  | -0.18693629  | 0.000355621 | 0.000847862 |
| SOX17     | -0.18691244  | 0.000356251 | 0.000849263 |
| KIF12     | 0.186909508  | 0.000356329 | 0.000849346 |
| ALDH2     | -0.186884139 | 0.000357    | 0.000850845 |
| NT5C1A    | -0.186878126 | 0.00035716  | 0.000851123 |
| CRYBB3    | 0.186838111  | 0.000358222 | 0.000853553 |
| CYP4F2    | -0.186799332 | 0.000359255 | 0.00085591  |
| NPW       | 0.186785213  | 0.000359631 | 0.000856705 |
| MIP       | -0.186735686 | 0.000360955 | 0.000859756 |
| DCTN5     | 0.186732231  | 0.000361047 | 0.000859873 |
| PACSIN1   | 0.186711311  | 0.000361608 | 0.000861106 |
| ST8SIA4   | -0.186692107 | 0.000362124 | 0.00086223  |
| MYO1C     | -0.186641669 | 0.00036348  | 0.000865357 |
| TERC      | 0.186633848  | 0.000363691 | 0.000865756 |
| KIF1A     | -0.186580405 | 0.000365135 | 0.000869089 |
| G3BP1     | -0.186544885 | 0.000366098 | 0.000871275 |
| LY96      | 0.186521018  | 0.000366746 | 0.000872713 |
| MFSD6     | -0.186518809 | 0.000366806 | 0.000872752 |

|           |              |             |             |
|-----------|--------------|-------------|-------------|
| LOC283070 | -0.186366963 | 0.000370954 | 0.000882518 |
| C6orf208  | -0.186360525 | 0.000371131 | 0.000882833 |
| HMHB1     | 0.186355845  | 0.00037126  | 0.000883033 |
| C3orf35   | 0.186352241  | 0.000371359 | 0.000883164 |
| FBXO40    | -0.186329577 | 0.000371982 | 0.000884541 |
| CYP2A7    | -0.186318128 | 0.000372298 | 0.000885185 |
| ALOX12    | -0.186308326 | 0.000372568 | 0.000885722 |
| SNAPC1    | -0.186289207 | 0.000373096 | 0.00088687  |
| C16orf54  | -0.186269773 | 0.000373633 | 0.000888041 |
| SAPS3     | -0.186256892 | 0.000373989 | 0.000888782 |
| LHX2      | -0.186202965 | 0.000375484 | 0.000892228 |
| SUFU      | -0.186143048 | 0.000377152 | 0.000896085 |
| EVC       | -0.186109342 | 0.000378093 | 0.000898214 |
| LCN2      | 0.186043897  | 0.000379927 | 0.000902462 |
| SIGLEC5   | -0.185850473 | 0.000385395 | 0.000915342 |
| MADD      | -0.185808714 | 0.000386585 | 0.000918059 |
| BIRC7     | 0.185794317  | 0.000386996 | 0.000918926 |
| CXorf36   | -0.185777376 | 0.000387481 | 0.000919966 |
| ALG2      | -0.18571225  | 0.000389348 | 0.000924289 |
| RBM45     | 0.185662081  | 0.000390791 | 0.000927606 |
| TRIM15    | 0.185659443  | 0.000390868 | 0.000927676 |
| USP4      | -0.185642057 | 0.000391369 | 0.000928756 |
| UCHL5     | -0.185638039 | 0.000391485 | 0.00092892  |
| FAM200B   | 0.185618974  | 0.000392036 | 0.000930117 |
| HSDL2     | -0.185606019 | 0.000392411 | 0.000930895 |
| TNNT1     | 0.185603205  | 0.000392492 | 0.000930977 |
| ASAM      | -0.185581527 | 0.00039312  | 0.000932356 |
| C2orf53   | 0.185568888  | 0.000393487 | 0.000933114 |
| CRCP      | -0.18556218  | 0.000393682 | 0.000933464 |
| DLAT      | -0.185526781 | 0.00039471  | 0.000935792 |
| MYO7A     | -0.185523285 | 0.000394812 | 0.000935893 |
| PAGE2B    | 0.18552209   | 0.000394847 | 0.000935893 |
| MRS2P2    | 0.185515621  | 0.000395035 | 0.000936228 |
| TREML3    | 0.185500332  | 0.000395481 | 0.000937172 |
| CYP4F22   | -0.185472951 | 0.00039628  | 0.000938954 |
| YWHAZ     | 0.185433504  | 0.000397433 | 0.000941576 |
| AMBP      | 0.185431395  | 0.000397495 | 0.00094161  |
| GLTPD2    | 0.18542721   | 0.000397618 | 0.000941788 |
| RTDR1     | 0.185411375  | 0.000398082 | 0.000942776 |
| RAB27B    | -0.185397979 | 0.000398475 | 0.000943594 |
| CCDC93    | -0.185394931 | 0.000398564 | 0.000943694 |
| SOAT1     | -0.185373631 | 0.00039919  | 0.000944997 |
| ZNF615    | -0.185372974 | 0.00039921  | 0.000944997 |
| INVS      | -0.185367498 | 0.000399371 | 0.000945266 |
| CIZ1      | 0.185341558  | 0.000400134 | 0.000946961 |
| PCNP      | -0.185324365 | 0.000400641 | 0.000948048 |

|           |              |             |             |
|-----------|--------------|-------------|-------------|
| WNT7A     | -0.185314478 | 0.000400933 | 0.000948626 |
| C9orf150  | -0.185281363 | 0.000401912 | 0.000950829 |
| CCDC99    | 0.185221051  | 0.000403701 | 0.000954947 |
| COX7B2    | 0.185218273  | 0.000403783 | 0.000955029 |
| MAP3K6    | -0.185208474 | 0.000404074 | 0.000955604 |
| RNF216L   | 0.185196332  | 0.000404436 | 0.000956345 |
| ST8SIA5   | 0.185189848  | 0.000404629 | 0.000956688 |
| HTR2B     | -0.185166067 | 0.000405338 | 0.00095825  |
| MYRIP     | -0.185150184 | 0.000405812 | 0.000959257 |
| RAP2A     | -0.185147059 | 0.000405905 | 0.000959289 |
| NMRAL1    | 0.185146499  | 0.000405922 | 0.000959289 |
| CTH       | -0.185139773 | 0.000406122 | 0.00095965  |
| SFRS7     | 0.185113864  | 0.000406897 | 0.000961367 |
| AGXT2L2   | -0.18509243  | 0.000407539 | 0.00096277  |
| TM9SF3    | -0.185088406 | 0.00040766  | 0.00096294  |
| MORF4L1   | 0.185085671  | 0.000407742 | 0.00096302  |
| NCL       | 0.185073376  | 0.000408111 | 0.000963777 |
| AMIGO2    | -0.18505979  | 0.000408519 | 0.000964626 |
| IKZF1     | -0.185054546 | 0.000408677 | 0.000964884 |
| PIK3AP1   | -0.185029486 | 0.00040943  | 0.000966549 |
| EPO       | 0.185022394  | 0.000409644 | 0.000966938 |
| MRPS22    | 0.185011405  | 0.000409975 | 0.000967515 |
| KLRC4     | -0.185011066 | 0.000409985 | 0.000967515 |
| AKR1B10   | 0.184992293  | 0.000410552 | 0.000968736 |
| PPP1R3D   | -0.184972359 | 0.000411154 | 0.000970042 |
| SSR3      | 0.184968236  | 0.000411278 | 0.000970221 |
| ENPP1     | -0.184957764 | 0.000411595 | 0.000970853 |
| FLJ40852  | -0.184951214 | 0.000411793 | 0.000971206 |
| ALDH8A1   | -0.184938342 | 0.000412183 | 0.00097201  |
| ART5      | 0.184923427  | 0.000412635 | 0.000972961 |
| SNAI2     | -0.184889886 | 0.000413653 | 0.000975247 |
| GNB5      | -0.184882915 | 0.000413865 | 0.000975631 |
| G0S2      | -0.18487193  | 0.0004142   | 0.000976303 |
| EVI2B     | -0.184848933 | 0.0004149   | 0.000977838 |
| SETDB1    | 0.184823166  | 0.000415686 | 0.000979575 |
| CLDN3     | 0.184812924  | 0.000415999 | 0.000980196 |
| C14orf19  | 0.184724204  | 0.000418718 | 0.000986487 |
| CST8      | 0.18470355   | 0.000419354 | 0.000987867 |
| PRPSAP2   | 0.184690078  | 0.000419768 | 0.000988727 |
| OR10A3    | 0.18468094   | 0.00042005  | 0.000989274 |
| MAP3K11   | 0.184662913  | 0.000420606 | 0.000990466 |
| GLTSCR1   | -0.184655355 | 0.00042084  | 0.000990899 |
| MUC6      | -0.184586284 | 0.000422978 | 0.000995816 |
| LOC339240 | -0.184584004 | 0.000423049 | 0.000995865 |
| C7orf46   | -0.184576436 | 0.000423284 | 0.0009963   |
| SMAD5OS   | 0.184571249  | 0.000423445 | 0.000996562 |



|           |              |             |             |
|-----------|--------------|-------------|-------------|
| ANKRD10   | -0.184555095 | 0.000423947 | 0.000997625 |
| FAM47E    | -0.184530947 | 0.000424699 | 0.000999276 |
| TSLP      | -0.184528728 | 0.000424768 | 0.00099932  |
| FAM124A   | -0.184520752 | 0.000425016 | 0.000999787 |
| BMS1P5    | -0.18447687  | 0.000426386 | 0.001002891 |
| SH2B2     | 0.184473806  | 0.000426482 | 0.001002998 |
| NRK       | -0.184460178 | 0.000426908 | 0.001003882 |
| KIAA1731  | -0.184442519 | 0.000427461 | 0.001005064 |
| SCOC      | -0.18443739  | 0.000427622 | 0.001005323 |
| SMCR7L    | -0.184426059 | 0.000427977 | 0.00100604  |
| TLL2      | 0.184422561  | 0.000428087 | 0.001006179 |
| APOH      | 0.184409019  | 0.000428512 | 0.001007009 |
| LOXHD1    | -0.184408097 | 0.000428541 | 0.001007009 |
| FAM43B    | -0.184405066 | 0.000428637 | 0.001007114 |
| THOC1     | 0.184397562  | 0.000428872 | 0.001007549 |
| C14orf184 | -0.18434676  | 0.000430472 | 0.001011188 |
| STX7      | -0.184309441 | 0.000431651 | 0.001013837 |
| ORC2L     | -0.18428505  | 0.000432423 | 0.00101553  |
| C2orf34   | 0.184274428  | 0.000432759 | 0.001016201 |
| KIF26B    | -0.18425171  | 0.00043348  | 0.001017773 |
| ABCB11    | -0.184242532 | 0.000433771 | 0.001018338 |
| SLC25A25  | -0.184237367 | 0.000433936 | 0.001018603 |
| CAMKK2    | -0.184231176 | 0.000434132 | 0.001018892 |
| GFPT2     | -0.184230268 | 0.000434161 | 0.001018892 |
| PALLD     | -0.184213572 | 0.000434692 | 0.001020019 |
| MFSD4     | -0.184205661 | 0.000434944 | 0.00102049  |
| USP43     | -0.184201285 | 0.000435084 | 0.001020696 |
| GNAZ      | 0.184165383  | 0.000436229 | 0.001023262 |
| GEFT      | -0.184147959 | 0.000436786 | 0.001024448 |
| SLC17A7   | -0.184144902 | 0.000436883 | 0.001024556 |
| SRGAP2    | -0.184118957 | 0.000437714 | 0.001026383 |
| BLK       | -0.18409623  | 0.000438442 | 0.00102797  |
| ZNF573    | -0.18407977  | 0.000438971 | 0.001029088 |
| TP53BP2   | -0.184045474 | 0.000440074 | 0.001031552 |
| ITGA6     | -0.184039106 | 0.000440279 | 0.001031798 |
| MED22     | 0.184038998  | 0.000440282 | 0.001031798 |
| AMN       | 0.184031679  | 0.000440518 | 0.00103223  |
| GAGE1     | 0.184021909  | 0.000440833 | 0.001032846 |
| SPAG8     | 0.183904247  | 0.000444643 | 0.001041649 |
| PRDM8     | -0.183872978 | 0.00044566  | 0.001043903 |
| DSG1      | -0.183871462 | 0.00044571  | 0.001043903 |
| CLEC9A    | -0.183847759 | 0.000446483 | 0.00104559  |
| ERLEC1    | -0.183831702 | 0.000447007 | 0.001046695 |
| ANKRD35   | -0.183823987 | 0.000447259 | 0.001047162 |
| APBB1IP   | -0.183812745 | 0.000447627 | 0.0010479   |
| SLC1A4    | 0.183806419  | 0.000447834 | 0.001048261 |

|           |              |             |             |
|-----------|--------------|-------------|-------------|
| SLC1A5    | 0.183801643  | 0.00044799  | 0.001048504 |
| GUF1      | -0.183739783 | 0.000450019 | 0.001053129 |
| ARPC1B    | 0.183716129  | 0.000450797 | 0.001054826 |
| ZNF160    | -0.183696987 | 0.000451428 | 0.00105616  |
| C2orf58   | -0.183695606 | 0.000451473 | 0.00105616  |
| GRHL3     | -0.183643695 | 0.000453188 | 0.001060047 |
| TIAM2     | -0.183636351 | 0.000453431 | 0.001060491 |
| MYCBP     | 0.183624802  | 0.000453814 | 0.001061261 |
| GLS2      | -0.18360599  | 0.000454437 | 0.001062595 |
| LIM2      | 0.183575255  | 0.000455458 | 0.001064856 |
| STX1B     | -0.18354913  | 0.000456327 | 0.001066763 |
| PRCP      | -0.183529363 | 0.000456986 | 0.001068177 |
| KLK2      | 0.183515905  | 0.000457435 | 0.001069101 |
| TRIM68    | -0.183486349 | 0.000458422 | 0.001071283 |
| DNAH2     | -0.183436649 | 0.000460087 | 0.001075048 |
| SHCBP1    | 0.183427861  | 0.000460382 | 0.001075611 |
| MPPED1    | -0.18334157  | 0.000463288 | 0.001082273 |
| LOC644172 | -0.183286999 | 0.000465134 | 0.001086459 |
| ACTB      | 0.183280472  | 0.000465355 | 0.001086848 |
| LMBR1L    | 0.183259014  | 0.000466084 | 0.001088421 |
| WBP4      | -0.183237354 | 0.00046682  | 0.001090013 |
| XAGE1D    | 0.183233431  | 0.000466953 | 0.001090196 |
| FAM19A2   | -0.183208065 | 0.000467817 | 0.001092085 |
| GDAP1L1   | 0.183175017  | 0.000468945 | 0.001094589 |
| ERBB2     | -0.183148319 | 0.000469857 | 0.00109659  |
| CHRNA7    | -0.183094676 | 0.000471696 | 0.001100753 |
| C7orf45   | -0.183076822 | 0.00047231  | 0.001102056 |
| C9orf144B | -0.183070902 | 0.000472513 | 0.001102402 |
| PCDHB16   | -0.183047951 | 0.000473303 | 0.001104115 |
| ZNF655    | -0.183037012 | 0.00047368  | 0.001104865 |
| C4orf21   | -0.183022769 | 0.000474171 | 0.001105882 |
| TPT1      | 0.183013704  | 0.000474484 | 0.001106482 |
| CASP10    | -0.1829761   | 0.000475784 | 0.001109268 |
| GSTA4     | 0.182975934  | 0.00047579  | 0.001109268 |
| OR56B1    | -0.182948555 | 0.000476739 | 0.001111349 |
| COL7A1    | 0.1829436    | 0.000476911 | 0.001111162 |
| C4orf48   | 0.182816267  | 0.000481348 | 0.00112183  |
| CCDC47    | -0.182775142 | 0.000482789 | 0.001125057 |
| ITGA7     | -0.182762135 | 0.000483245 | 0.001125945 |
| TMED2     | -0.182761066 | 0.000483283 | 0.001125945 |
| LYRM7     | -0.182717986 | 0.000484798 | 0.001129343 |
| PIGA      | -0.18270606  | 0.000485218 | 0.00113019  |
| TCP1      | 0.18267743   | 0.000486229 | 0.001132295 |
| PDDC1     | 0.182677236  | 0.000486236 | 0.001132295 |
| PIK3IP1   | -0.182672481 | 0.000486404 | 0.001132553 |
| RNGTT     | -0.182658753 | 0.000486889 | 0.001133551 |

|          |              |             |             |
|----------|--------------|-------------|-------------|
| KIAA0513 | -0.182610452 | 0.0004886   | 0.001137402 |
| STK11IP  | 0.182596204  | 0.000489106 | 0.001138446 |
| EFNA1    | 0.182584891  | 0.000489508 | 0.001139248 |
| POGZ     | -0.182548035 | 0.000490819 | 0.001142168 |
| NFXL1    | -0.182535301 | 0.000491273 | 0.00114309  |
| INPP4B   | -0.182466519 | 0.000493732 | 0.001148677 |
| GOLGA6C  | -0.182436289 | 0.000494816 | 0.001151065 |
| L3MBTL3  | -0.182434397 | 0.000494884 | 0.001151089 |
| PLAU     | -0.182411874 | 0.000495694 | 0.001152836 |
| MYCL1    | -0.182378789 | 0.000496885 | 0.001155472 |
| C5orf32  | 0.18235309   | 0.000497812 | 0.001157492 |
| RELB     | 0.18233306   | 0.000498535 | 0.001159039 |
| PHF7     | 0.182327817  | 0.000498725 | 0.001159345 |
| PDCD11   | 0.182323616  | 0.000498877 | 0.001159563 |
| IMPAD1   | -0.18230439  | 0.000499573 | 0.001161045 |
| GNPDA2   | -0.182293257 | 0.000499976 | 0.001161847 |
| PFKFB4   | 0.182266485  | 0.000500948 | 0.001163968 |
| AGRN     | -0.182249531 | 0.000501564 | 0.001165264 |
| ICAM2    | 0.182244091  | 0.000501761 | 0.001165587 |
| SLC7A5P1 | -0.182231467 | 0.000502221 | 0.001166518 |
| CASP3    | -0.182106986 | 0.000506771 | 0.00117695  |
| C16orf5  | 0.182087581  | 0.000507484 | 0.001178468 |
| ZNF662   | -0.182066302 | 0.000508266 | 0.001180148 |
| DAND5    | 0.182011655  | 0.000510282 | 0.001184688 |
| SYDE1    | -0.181986235 | 0.000511221 | 0.001186732 |
| FMO3     | -0.181967372 | 0.00051192  | 0.001188215 |
| GTPBP2   | 0.18193606   | 0.000513081 | 0.001190705 |
| INHBB    | -0.181935227 | 0.000513112 | 0.001190705 |
| MANBA    | -0.181902014 | 0.000514347 | 0.001193431 |
| ZBED4    | -0.181888827 | 0.000514838 | 0.001194431 |
| TPBG     | -0.18187216  | 0.000515459 | 0.001195733 |
| ZNF485   | 0.181841681  | 0.000516597 | 0.001198233 |
| NIT2     | 0.18182085   | 0.000517376 | 0.0011999   |
| SNORA74A | 0.181771359  | 0.000519231 | 0.001204062 |
| GTPBP3   | 0.18175779   | 0.00051974  | 0.001205103 |
| NADK     | -0.181733644 | 0.000520649 | 0.001207068 |
| TAF6     | 0.181652747  | 0.000523702 | 0.001214005 |
| YOD1     | -0.181649604 | 0.000523821 | 0.00121414  |
| SDC4P    | -0.181483478 | 0.000530144 | 0.001228653 |
| C6orf47  | 0.181464261  | 0.00053088  | 0.001230216 |
| THUMPD2  | 0.181447986  | 0.000531504 | 0.001231519 |
| ICA1L    | -0.181381927 | 0.000534044 | 0.00123726  |
| SMN2     | 0.181345923  | 0.000535433 | 0.001240334 |
| PPM1H    | -0.181276728 | 0.000538112 | 0.001246395 |
| TCF15    | 0.181241393  | 0.000539485 | 0.00124943  |
| FAM168B  | -0.181223621 | 0.000540177 | 0.001250887 |

|           |              |             |             |
|-----------|--------------|-------------|-------------|
| PWRN1     | -0.181215861 | 0.000540479 | 0.001251441 |
| SERPINA13 | 0.181206619  | 0.00054084  | 0.00125213  |
| TPCN2     | -0.181201089 | 0.000541055 | 0.001252484 |
| WISP2     | -0.1811706   | 0.000542246 | 0.001255094 |
| GNRHR2    | 0.181151559  | 0.00054299  | 0.001256671 |
| RASA4     | -0.181149363 | 0.000543076 | 0.001256724 |
| RPL23AP7  | 0.181128332  | 0.0005439   | 0.001258484 |
| CDK5RAP2  | 0.181071986  | 0.000546113 | 0.001263457 |
| FXYD6     | -0.181053367 | 0.000546846 | 0.001264999 |
| CARD16    | 0.181051828  | 0.000546907 | 0.001264999 |
| CRB1      | -0.181046865 | 0.000547102 | 0.001265305 |
| SLC16A3   | 0.181003784  | 0.000548802 | 0.00126909  |
| PPP3CC    | -0.180998423 | 0.000549014 | 0.001269432 |
| SAMD13    | 0.180976383  | 0.000549886 | 0.001271301 |
| PIK3CB    | -0.180950233 | 0.000550923 | 0.001273549 |
| LRRC17    | -0.180945117 | 0.000551126 | 0.00127387  |
| CDKN1B    | -0.180941914 | 0.000551253 | 0.001274016 |
| CHRFAM7A  | -0.180908312 | 0.000552588 | 0.001276954 |
| PPFIA2    | -0.180805792 | 0.00055668  | 0.00128626  |
| LOXL1     | -0.180796923 | 0.000557035 | 0.001286932 |
| PRC1      | 0.180792621  | 0.000557207 | 0.001287181 |
| HERPUD2   | -0.180781207 | 0.000557665 | 0.001288089 |
| PPT2      | 0.180715221  | 0.000560318 | 0.001294066 |
| PRIMA1    | -0.18069561  | 0.000561109 | 0.001295732 |
| LOC728264 | -0.180694112 | 0.000561169 | 0.001295732 |
| C15orf23  | 0.180662497  | 0.000562446 | 0.00129853  |
| HPS1      | 0.18065614   | 0.000562703 | 0.001298942 |
| U2AF2     | 0.180654859  | 0.000562755 | 0.001298942 |
| DND1      | -0.18060043  | 0.000564961 | 0.001303882 |
| C5orf46   | 0.180563394  | 0.000566467 | 0.001307205 |
| PGK2      | 0.180558452  | 0.000566668 | 0.001307518 |
| MPP1      | -0.18055644  | 0.00056675  | 0.001307556 |
| SNORA57   | 0.180512462  | 0.000568543 | 0.001311541 |
| MAGEA6    | 0.180486954  | 0.000569586 | 0.001313794 |
| GADD45B   | -0.180484537 | 0.000569685 | 0.00131387  |
| AKR1A1    | 0.180473697  | 0.000570128 | 0.001314709 |
| TRIM69    | -0.180472432 | 0.00057018  | 0.001314709 |
| TXNDC15   | -0.180424593 | 0.000572142 | 0.00131908  |
| TRIP10    | 0.180411637  | 0.000572675 | 0.001320155 |
| PRDM5     | -0.180401541 | 0.00057309  | 0.001320959 |
| CCT8      | 0.180364499  | 0.000574616 | 0.001324323 |
| TGFBII1   | -0.180301636 | 0.000577214 | 0.001330157 |
| CAPZA1    | -0.180266066 | 0.000578689 | 0.001333402 |
| LCA5L     | -0.180172702 | 0.000582577 | 0.001342206 |
| DLX4      | 0.180141801  | 0.000583869 | 0.001345027 |
| GLTP      | 0.180114353  | 0.00058502  | 0.001347521 |

|           |              |             |             |
|-----------|--------------|-------------|-------------|
| PIGZ      | 0.180088369  | 0.00058611  | 0.001349877 |
| TMEM167B  | -0.180046655 | 0.000587865 | 0.001353762 |
| RPP14     | -0.179958006 | 0.00059161  | 0.001362229 |
| NBR1      | -0.179947155 | 0.00059207  | 0.001363131 |
| CC2D1B    | 0.17990291   | 0.000593949 | 0.001367299 |
| COL2A1    | 0.179888911  | 0.000594545 | 0.001368512 |
| LAMB2L    | 0.179871469  | 0.000595288 | 0.001369987 |
| SERPINE1  | -0.179870631 | 0.000595324 | 0.001369987 |
| TAS2R60   | -0.179861826 | 0.000595699 | 0.001370693 |
| MYOM2     | -0.17983509  | 0.00059684  | 0.00137316  |
| CCDC88B   | 0.179792044  | 0.000598682 | 0.001377238 |
| RRH       | -0.179789745 | 0.00059878  | 0.001377306 |
| STEAP3    | -0.179706494 | 0.000602358 | 0.001385374 |
| MCF2L2    | -0.179699172 | 0.000602673 | 0.00138594  |
| CIAO1     | 0.179690285  | 0.000603056 | 0.001386661 |
| TBCE      | 0.179656589  | 0.000604511 | 0.001389846 |
| GBA2      | -0.179644227 | 0.000605046 | 0.001390915 |
| ARHGAP4   | 0.179631054  | 0.000605616 | 0.001392065 |
| FGFR1OP   | -0.179566636 | 0.000608412 | 0.001398258 |
| FAM48A    | -0.179565733 | 0.000608451 | 0.001398258 |
| C1orf21   | -0.179562014 | 0.000608613 | 0.001398468 |
| GIMAP4    | -0.179542467 | 0.000609464 | 0.001400262 |
| ISL2      | 0.179526151  | 0.000610175 | 0.001401734 |
| TMEM69    | 0.179515696  | 0.000610631 | 0.001402505 |
| HIST2H4A  | 0.179515228  | 0.000610651 | 0.001402505 |
| HDC       | -0.179503712 | 0.000611154 | 0.001403498 |
| RFFL      | -0.179498776 | 0.00061137  | 0.001403814 |
| ACSF2     | 0.179497329  | 0.000611433 | 0.001403814 |
| ACTR8     | 0.179491521  | 0.000611687 | 0.001404235 |
| CHRNA10   | 0.179385369  | 0.000616342 | 0.00141476  |
| C6orf203  | 0.179377027  | 0.00061671  | 0.00141544  |
| C10orf119 | -0.179372728 | 0.000616899 | 0.001415711 |
| PACRGL    | -0.17936718  | 0.000617143 | 0.001416109 |
| RPRD1A    | -0.179345613 | 0.000618095 | 0.001418128 |
| STXBP4    | -0.179291305 | 0.000620495 | 0.001423473 |
| C14orf126 | -0.17928942  | 0.000620579 | 0.0014235   |
| SOX8      | -0.179252389 | 0.000622221 | 0.001427023 |
| LOC550112 | -0.179251558 | 0.000622258 | 0.001427023 |
| RPS28     | 0.179249211  | 0.000622362 | 0.001427098 |
| ID4       | -0.179222368 | 0.000623556 | 0.001429669 |
| SF3B2     | 0.179216968  | 0.000623796 | 0.001430056 |
| C12orf68  | -0.179206014 | 0.000624284 | 0.001430877 |
| PCNT      | -0.179205699 | 0.000624298 | 0.001430877 |
| IKBKG     | 0.17918408   | 0.000625261 | 0.00143292  |
| TNFAIP6   | -0.179180101 | 0.000625439 | 0.001433162 |
| TMPRSS2   | -0.179146778 | 0.000626927 | 0.001436246 |

|           |              |             |             |
|-----------|--------------|-------------|-------------|
| PNMA6A    | 0.179146735  | 0.000626929 | 0.001436246 |
| NPR1      | -0.179137476 | 0.000627343 | 0.00143703  |
| TM6SF2    | -0.179116587 | 0.000628278 | 0.001438859 |
| FAM83B    | -0.1791158   | 0.000628314 | 0.001438859 |
| WDR54     | 0.179114798  | 0.000628358 | 0.001438859 |
| STK16     | 0.179081069  | 0.000629872 | 0.001442158 |
| SUDS3     | -0.179068627 | 0.000630431 | 0.001443272 |
| POFUT2    | -0.179057397 | 0.000630935 | 0.001444262 |
| SGOL2     | 0.178980976  | 0.000634381 | 0.001451983 |
| NUDT21    | -0.178963955 | 0.000635151 | 0.001453578 |
| HHAT      | -0.17883105  | 0.000641193 | 0.001467236 |
| FKBP5     | -0.178770741 | 0.000643952 | 0.00147338  |
| WDR12     | 0.17869185   | 0.000647577 | 0.001481505 |
| CES7      | -0.178686942 | 0.000647803 | 0.001481852 |
| LOC441601 | 0.17868358   | 0.000647958 | 0.001482036 |
| C17orf39  | -0.178666951 | 0.000648725 | 0.00148362  |
| ATP8A2    | -0.178643663 | 0.000649801 | 0.00148591  |
| HSD3B1    | -0.178608091 | 0.000651447 | 0.001489503 |
| LMO2      | -0.17855607  | 0.000653862 | 0.001494852 |
| MSX2      | -0.178531198 | 0.000655019 | 0.001497325 |
| C19orf23  | 0.178525713  | 0.000655274 | 0.001497737 |
| C5orf55   | 0.178501175  | 0.000656418 | 0.00150018  |
| CCNA2     | 0.178466089  | 0.000658057 | 0.001503688 |
| SIVA1     | 0.17846499   | 0.000658109 | 0.001503688 |
| DUSP3     | -0.178463471 | 0.00065818  | 0.001503688 |
| PROM2     | -0.178455843 | 0.000658537 | 0.001504331 |
| GOLGA7    | -0.178452286 | 0.000658703 | 0.001504538 |
| RSU1      | -0.17839775  | 0.00066126  | 0.001510206 |
| RFX6      | 0.17839211   | 0.000661525 | 0.001510638 |
| ZBTB5     | -0.178388881 | 0.000661677 | 0.001510812 |
| CCDC8     | -0.178312538 | 0.000665275 | 0.001518852 |
| TMEM54    | 0.178305273  | 0.000665618 | 0.001519461 |
| PPP2CA    | 0.178302305  | 0.000665758 | 0.001519607 |
| AFG3L1    | -0.178283788 | 0.000666634 | 0.001521432 |
| PGAM1     | 0.178276847  | 0.000666963 | 0.001522008 |
| C12orf74  | -0.178239796 | 0.000668719 | 0.001525842 |
| TSPO      | 0.178231303  | 0.000669123 | 0.001526587 |
| LOC647121 | -0.178169859 | 0.000672047 | 0.001533083 |
| SLC2A12   | -0.178147785 | 0.0006731   | 0.00153531  |
| CABIN1    | -0.178121226 | 0.00067437  | 0.001538029 |
| ANGPTL6   | -0.178101383 | 0.000675319 | 0.001540019 |
| FLJ44635  | 0.178055653  | 0.000677513 | 0.001544845 |
| DCAF11    | -0.178041233 | 0.000678206 | 0.001546248 |
| HUS1      | -0.178006997 | 0.000679855 | 0.001549829 |
| C2CD2     | -0.177995061 | 0.00068043  | 0.001550963 |
| ANXA7     | -0.177991031 | 0.000680625 | 0.001551229 |

|           |              |             |             |
|-----------|--------------|-------------|-------------|
| BLM       | 0.177973861  | 0.000681454 | 0.001552941 |
| C11orf49  | 0.177959704  | 0.000682138 | 0.001554322 |
| BTBD12    | -0.177945237 | 0.000682838 | 0.001555738 |
| CRIP1     | 0.177924797  | 0.000683827 | 0.001557815 |
| SMOC2     | -0.17791061  | 0.000684515 | 0.001559204 |
| KRTAP19-5 | 0.177888275  | 0.000685599 | 0.001561495 |
| ATP6V1C2  | 0.177884888  | 0.000685764 | 0.001561691 |
| C6orf120  | -0.17782352  | 0.000688752 | 0.001568316 |
| DDX46     | -0.1777796   | 0.000690897 | 0.001573021 |
| EDC4      | 0.177762473  | 0.000691736 | 0.00157475  |
| GMPR      | -0.177737437 | 0.000692963 | 0.001577364 |
| LOC143188 | 0.177681276  | 0.000695723 | 0.001583466 |
| MYADM     | -0.177625548 | 0.000698472 | 0.001589541 |
| NLGN2     | -0.177621783 | 0.000698658 | 0.001589783 |
| MAP1D     | 0.17761236   | 0.000699124 | 0.001590661 |
| BATF3     | 0.17760941   | 0.00069927  | 0.001590811 |
| LOC401093 | -0.177591664 | 0.000700148 | 0.001592628 |
| PI4KAP2   | -0.177588109 | 0.000700325 | 0.001592847 |
| NCRNA0016 | 0.177568417  | 0.000701301 | 0.001594885 |
| SPATA17   | 0.177531544  | 0.000703132 | 0.001598867 |
| PTPRT     | -0.177480578 | 0.000705671 | 0.001604456 |
| LOC388387 | -0.177428203 | 0.000708288 | 0.001610223 |
| OTUD3     | -0.177420418 | 0.000708678 | 0.001610926 |
| REPS1     | -0.177378682 | 0.000710771 | 0.0016155   |
| VIM       | -0.177362909 | 0.000711564 | 0.001617117 |
| DNAH8     | 0.177255144  | 0.000717001 | 0.001629287 |
| TBC1D9    | -0.177229699 | 0.00071829  | 0.001632031 |
| IAH1      | 0.177216235  | 0.000718973 | 0.001633397 |
| TIGD2     | -0.177203844 | 0.000719603 | 0.00163464  |
| TMEM44    | 0.177200888  | 0.000719753 | 0.001634794 |
| DCAF6     | -0.17719481  | 0.000720062 | 0.00163531  |
| KCNK1     | -0.17715996  | 0.000721835 | 0.00163915  |
| OTX1      | -0.177113371 | 0.000724212 | 0.001644361 |
| IKBIP     | 0.177100677  | 0.000724861 | 0.001645647 |
| ZNF75A    | 0.177080357  | 0.000725901 | 0.00164782  |
| PVRIG     | -0.177063164 | 0.000726782 | 0.001649632 |
| ZNF134    | -0.176991309 | 0.000730475 | 0.001657824 |
| ZNF672    | 0.176983862  | 0.000730859 | 0.001658506 |
| EIF4E     | -0.17695825  | 0.00073218  | 0.001661315 |
| SPA17     | 0.176954262  | 0.000732386 | 0.001661593 |
| ZSCAN12P1 | -0.176935013 | 0.00073338  | 0.001663659 |
| TSPAN12   | -0.176904023 | 0.000734984 | 0.001667108 |
| P2RY14    | -0.176848747 | 0.000737853 | 0.001673424 |
| GPR161    | -0.176843364 | 0.000738133 | 0.001673868 |
| DDX55     | 0.17683791   | 0.000738416 | 0.001674321 |
| TESC      | 0.176825097  | 0.000739083 | 0.001675642 |

|           |              |             |             |
|-----------|--------------|-------------|-------------|
| ZBTB41    | -0.176815307 | 0.000739593 | 0.001676608 |
| NTSR1     | -0.176717746 | 0.000744693 | 0.001687976 |
| SRRM5     | 0.176701595  | 0.00074554  | 0.001689705 |
| HMGB4     | -0.176675972 | 0.000746886 | 0.001692563 |
| PITX3     | 0.176665558  | 0.000747434 | 0.001693611 |
| MAP1A     | -0.176642366 | 0.000748655 | 0.001696186 |
| KDM4DL    | -0.176622781 | 0.000749688 | 0.001698332 |
| AKR1D1    | -0.176571547 | 0.000752396 | 0.001704272 |
| TMEM53    | 0.176563078  | 0.000752844 | 0.001705094 |
| TBL2      | 0.176549358  | 0.000753571 | 0.001706547 |
| LIN28B    | 0.176511631  | 0.000755574 | 0.001710887 |
| LCORL     | -0.176413809 | 0.000760789 | 0.001722501 |
| OR10AD1   | -0.176402478 | 0.000761396 | 0.001723678 |
| MEF2D     | -0.176387352 | 0.000762206 | 0.001725315 |
| ZRSR2     | 0.176382314  | 0.000762476 | 0.00172573  |
| TMEM168   | -0.176368008 | 0.000763243 | 0.00172727  |
| SNORD115- | -0.176365154 | 0.000763396 | 0.00172742  |
| SPDYE6    | -0.176341378 | 0.000764672 | 0.00173004  |
| CDC16     | 0.176340358  | 0.000764727 | 0.00173004  |
| RBM12     | -0.176319332 | 0.000765858 | 0.001732401 |
| TMEM68    | 0.176278155  | 0.000768077 | 0.001737223 |
| CISH      | -0.176262513 | 0.000768921 | 0.001738936 |
| TMEM19    | -0.176228834 | 0.000770742 | 0.001742856 |
| RAB15     | 0.176216994  | 0.000771384 | 0.001744108 |
| CACNG8    | -0.176193302 | 0.000772668 | 0.001746814 |
| CREB5     | -0.17616382  | 0.000774269 | 0.001750235 |
| RASGRP1   | -0.176154889 | 0.000774755 | 0.001751134 |
| ZDHHC19   | 0.176132065  | 0.000775997 | 0.001753743 |
| VWF       | -0.176127202 | 0.000776262 | 0.001754143 |
| SDCCAG3   | 0.176123292  | 0.000776475 | 0.001754425 |
| IP6K3     | -0.176097315 | 0.000777892 | 0.001757428 |
| OR52W1    | -0.176046014 | 0.000780698 | 0.001763481 |
| GPC1      | -0.176045078 | 0.000780749 | 0.001763481 |
| GAB3      | -0.176032348 | 0.000781447 | 0.001764857 |
| DKKL1     | 0.175976908  | 0.000784492 | 0.001771533 |
| PIP4K2A   | -0.175967617 | 0.000785003 | 0.001772487 |
| C16orf46  | -0.17596563  | 0.000785112 | 0.001772533 |
| OR2A7     | -0.17596214  | 0.000785305 | 0.001772766 |
| ZDHHC1    | -0.175909604 | 0.000788203 | 0.001779107 |
| MORF4L2   | -0.175901599 | 0.000788646 | 0.001779904 |
| NKAIN1    | 0.175882011  | 0.000789729 | 0.001782148 |
| FLJ35390  | -0.175877352 | 0.000789987 | 0.001782529 |
| XIST      | -0.175854049 | 0.000791279 | 0.00178524  |
| PTCD2     | -0.175813671 | 0.000793521 | 0.001790097 |
| CYP2B7P1  | -0.175802883 | 0.000794121 | 0.001791248 |
| COPA      | -0.175788923 | 0.000794899 | 0.001792798 |



|           |              |             |             |
|-----------|--------------|-------------|-------------|
| PGBD1     | 0.175786331  | 0.000795043 | 0.00179292  |
| CACNG1    | 0.175745535  | 0.000797319 | 0.001797849 |
| PKD2L2    | -0.175737842 | 0.000797748 | 0.001798614 |
| SFRP4     | -0.175715843 | 0.000798979 | 0.001801184 |
| TPST1     | -0.175677334 | 0.000801136 | 0.001805844 |
| LOC400759 | -0.175572756 | 0.000807023 | 0.001818908 |
| KIAA1407  | -0.17546822  | 0.000812948 | 0.001832053 |
| FURIN     | -0.17545645  | 0.000813617 | 0.001833354 |
| CECR2     | -0.175451892 | 0.000813877 | 0.001833732 |
| SHMT2     | 0.175420006  | 0.000815694 | 0.001837618 |
| MMP24     | 0.175416713  | 0.000815882 | 0.001837833 |
| MRAP2     | 0.175403427  | 0.00081664  | 0.001839281 |
| PAGE5     | 0.175399302  | 0.000816875 | 0.001839281 |
| VIL1      | 0.175397865  | 0.000816958 | 0.001839281 |
| ZNF684    | -0.175397483 | 0.000816979 | 0.001839281 |
| PRPF39    | -0.175397364 | 0.000816986 | 0.001839281 |
| GNASAS    | 0.175390808  | 0.000817361 | 0.001839916 |
| MRFAP1    | 0.175387691  | 0.000817539 | 0.001840109 |
| TNP1      | 0.175385642  | 0.000817656 | 0.001840165 |
| ABHD11    | 0.175356422  | 0.000819328 | 0.00184372  |
| C1orf83   | -0.175305367 | 0.000822257 | 0.001849936 |
| CHRNA1    | -0.175305035 | 0.000822276 | 0.001849936 |
| C9orf25   | -0.175298298 | 0.000822664 | 0.001850598 |
| CCDC68    | -0.175227613 | 0.000826737 | 0.001859551 |
| ACPI      | 0.175199248  | 0.000828377 | 0.001863029 |
| VWCE      | 0.175174968  | 0.000829783 | 0.00186598  |
| EFHA1     | -0.175120769 | 0.000832929 | 0.001872844 |
| UBE2Q1    | 0.175114317  | 0.000833304 | 0.001873477 |
| WNT6      | 0.175107932  | 0.000833676 | 0.001874101 |
| ZNF624    | -0.175097648 | 0.000834275 | 0.001875213 |
| TMEM41B   | 0.1750962    | 0.000834359 | 0.001875213 |
| AGAP8     | -0.17508831  | 0.000834819 | 0.001876034 |
| ZNF611    | -0.175041379 | 0.000837558 | 0.001881977 |
| EFCAB7    | -0.174999955 | 0.000839983 | 0.001887213 |
| PKIG      | 0.174993669  | 0.000840351 | 0.001887828 |
| KCTD6     | 0.17498559   | 0.000840825 | 0.001888679 |
| ZNF665    | -0.174902287 | 0.000845725 | 0.001899471 |
| KCNK13    | -0.174879184 | 0.000847089 | 0.001902185 |
| SIX2      | 0.174878578  | 0.000847124 | 0.001902185 |
| SYVN1     | -0.174866967 | 0.000847811 | 0.001903511 |
| F2RL1     | -0.174854335 | 0.000848558 | 0.001904873 |
| C2orf76   | 0.174852353  | 0.000848675 | 0.001904873 |
| PTP4A1    | -0.174851861 | 0.000848704 | 0.001904873 |
| MTA3      | 0.17482606   | 0.000850232 | 0.001908087 |
| ANKRD7    | 0.1747822    | 0.000852835 | 0.001913714 |
| SFRS4     | -0.174768355 | 0.000853658 | 0.001915346 |

|           |              |             |             |
|-----------|--------------|-------------|-------------|
| ZNF860    | -0.17476041  | 0.000854131 | 0.001916191 |
| C2orf67   | -0.17475837  | 0.000854253 | 0.001916247 |
| HNRNPU    | 0.174738221  | 0.000855453 | 0.001918723 |
| NR0B1     | 0.174729374  | 0.00085598  | 0.00191969  |
| C8orf46   | -0.174720693 | 0.000856498 | 0.001920635 |
| ARHGAP10  | -0.174710192 | 0.000857125 | 0.001921628 |
| ARL6IP5   | -0.174710044 | 0.000857134 | 0.001921628 |
| CAPSL     | 0.174677374  | 0.000859087 | 0.00192579  |
| DGCR9     | -0.174648433 | 0.00086082  | 0.001929458 |
| LARP1     | -0.174622051 | 0.000862403 | 0.001932789 |
| ABCF2     | 0.174618715  | 0.000862604 | 0.001933021 |
| P2RY8     | -0.174583407 | 0.000864727 | 0.00193756  |
| C12orf43  | 0.174548926  | 0.000866805 | 0.001941998 |
| GPHA2     | 0.17454013   | 0.000867336 | 0.001942969 |
| ATG16L2   | -0.174523115 | 0.000868364 | 0.001945053 |
| SYT10     | -0.174473799 | 0.000871349 | 0.00195152  |
| IPCEF1    | -0.174445737 | 0.000873052 | 0.001955114 |
| RMND5B    | 0.174438961  | 0.000873464 | 0.001955816 |
| PHLDA1    | -0.174384431 | 0.000876783 | 0.001963028 |
| CDKL3     | 0.17436824   | 0.000877771 | 0.001965018 |
| R3HCC1    | 0.17430436   | 0.000881678 | 0.001973544 |
| ZGPAT     | 0.174258281  | 0.000884506 | 0.001979652 |
| C20orf165 | -0.174231987 | 0.000886124 | 0.00198305  |
| CADM1     | -0.174207131 | 0.000887656 | 0.001986255 |
| FOXMI     | 0.174145558  | 0.000891461 | 0.001994449 |
| AGBL2     | -0.174144275 | 0.00089154  | 0.001994449 |
| GABRP     | -0.174143019 | 0.000891618 | 0.001994449 |
| PCNXL2    | -0.174115594 | 0.000893318 | 0.001998027 |
| FAM160B2  | -0.174093961 | 0.000894661 | 0.002000806 |
| RAB9B     | -0.174088127 | 0.000895024 | 0.002001392 |
| ZNF414    | 0.174053214  | 0.000897196 | 0.002006024 |
| CAPN5     | -0.174037496 | 0.000898175 | 0.002007989 |
| BUB1B     | 0.174009936  | 0.000899895 | 0.002011608 |
| UBTD2     | -0.174005327 | 0.000900183 | 0.002012026 |
| CWC25     | -0.17399901  | 0.000900578 | 0.002012682 |
| C14orf142 | 0.173988615  | 0.000901228 | 0.002013797 |
| LGALS7B   | 0.173987798  | 0.000901279 | 0.002013797 |
| UPF0639   | -0.173940731 | 0.000904227 | 0.002020158 |
| RXFP4     | 0.173925744  | 0.000905168 | 0.002022033 |
| CPD       | -0.173893185 | 0.000907215 | 0.002026378 |
| TMEM72    | -0.173877302 | 0.000908215 | 0.002028311 |
| ZNF345    | -0.173876205 | 0.000908284 | 0.002028311 |
| FXR1      | 0.173849141  | 0.00090999  | 0.002031633 |
| AGPAT2    | 0.173847804  | 0.000910075 | 0.002031633 |
| NTN1      | -0.173847759 | 0.000910078 | 0.002031633 |
| SSX6      | 0.17383104   | 0.000911133 | 0.002033762 |

|           |              |             |             |
|-----------|--------------|-------------|-------------|
| CCR7      | -0.173823001 | 0.000911641 | 0.002034668 |
| SLC4A8    | -0.173805317 | 0.00091276  | 0.002036936 |
| WDFY4     | -0.173803043 | 0.000912904 | 0.002037029 |
| IL12A     | 0.173783473  | 0.000914143 | 0.002039566 |
| ALDH3A1   | 0.173764453  | 0.000915349 | 0.002042028 |
| EP400NL   | -0.173750712 | 0.000916222 | 0.002043643 |
| LMNB1     | 0.173749813  | 0.000916279 | 0.002043643 |
| IER3      | 0.173690846  | 0.000920031 | 0.002051782 |
| IFNAR1    | -0.173674811 | 0.000921053 | 0.002053723 |
| CCDC141   | -0.173673962 | 0.000921108 | 0.002053723 |
| ADAM12    | -0.173623242 | 0.00092435  | 0.002060721 |
| C1orf104  | -0.173616285 | 0.000924795 | 0.002061484 |
| FMNL2     | -0.173593914 | 0.000926229 | 0.002064385 |
| OMP       | -0.173592745 | 0.000926304 | 0.002064385 |
| IGLL3     | 0.173576931  | 0.000927319 | 0.002066416 |
| GALM      | 0.17356815   | 0.000927883 | 0.002067441 |
| LOC100130 | -0.173517422 | 0.000931148 | 0.002074483 |
| GRPEL2    | 0.173479268  | 0.00093361  | 0.002079736 |
| GNG2      | -0.173460409 | 0.000934829 | 0.00208222  |
| FUNDC1    | 0.17344475   | 0.000935843 | 0.002084244 |
| C17orf99  | 0.173441591  | 0.000936047 | 0.002084467 |
| CSRP2BP   | 0.17343852   | 0.000936246 | 0.002084677 |
| PAQR6     | 0.173435551  | 0.000936439 | 0.002084872 |
| FAM125B   | -0.173425662 | 0.00093708  | 0.002086066 |
| MAST1     | 0.173387139  | 0.000939581 | 0.002091399 |
| C19orf35  | -0.173384515 | 0.000939751 | 0.002091545 |
| CES8      | -0.173378541 | 0.00094014  | 0.002092176 |
| ADAMTS17  | -0.173374377 | 0.00094041  | 0.002092545 |
| SRD5A3    | 0.173357913  | 0.000941482 | 0.002094695 |
| ACTG2     | 0.173230929  | 0.000949785 | 0.002112931 |
| MBNL3     | -0.173216153 | 0.000950755 | 0.002114854 |
| ZNF589    | 0.173206209  | 0.000951409 | 0.002116072 |
| DHX30     | 0.173190556  | 0.000952438 | 0.002118125 |
| SHH       | -0.173174894 | 0.00095347  | 0.002120182 |
| TCF7      | 0.173169972  | 0.000953794 | 0.002120666 |
| ATOH8     | -0.173156995 | 0.00095465  | 0.002122332 |
| LONRF3    | -0.173104682 | 0.000958106 | 0.002129647 |
| MSGN1     | 0.173103959  | 0.000958154 | 0.002129647 |
| C11orf52  | 0.17310055   | 0.000958379 | 0.00212991  |
| GCH1      | -0.173089932 | 0.000959083 | 0.002131235 |
| GATAD1    | -0.173071105 | 0.00096033  | 0.00213377  |
| VRK3      | 0.17304064   | 0.000962353 | 0.002138025 |
| ANKRD20A4 | -0.173030846 | 0.000963004 | 0.002139233 |
| CHRNA4    | -0.173015232 | 0.000964043 | 0.002141301 |
| OGFOD1    | -0.173007175 | 0.000964579 | 0.002142254 |
| MAP7D3    | -0.172990782 | 0.000965671 | 0.00214444  |

|            |              |             |             |
|------------|--------------|-------------|-------------|
| ABCC6P2    | 0.172981742  | 0.000966274 | 0.00214554  |
| ETHE1      | 0.172948391  | 0.000968501 | 0.002150244 |
| DDC        | 0.17290462   | 0.00097143  | 0.002156307 |
| SLC35E3    | -0.172904359 | 0.000971448 | 0.002156307 |
| C17orf47   | -0.172887403 | 0.000972585 | 0.002158591 |
| CCDC62     | -0.17287721  | 0.000973269 | 0.002159868 |
| LYG1       | 0.17287447   | 0.000973453 | 0.002160036 |
| C5orf22    | -0.172840883 | 0.000975711 | 0.002164805 |
| PCGF3      | -0.172791514 | 0.000979039 | 0.002171946 |
| TRNP1      | 0.17276251   | 0.000980999 | 0.002176052 |
| FAIM2      | -0.172745891 | 0.000982124 | 0.002178304 |
| FKBP1B     | 0.172734562  | 0.000982891 | 0.002179763 |
| PHF17      | -0.172725886 | 0.000983479 | 0.002180824 |
| JAZF1      | -0.172651196 | 0.000988554 | 0.002191835 |
| KEAP1      | 0.172637282  | 0.000989503 | 0.002193693 |
| DCT        | -0.172616006 | 0.000990954 | 0.002196666 |
| DKFZP586I1 | -0.172568159 | 0.000994225 | 0.002203673 |
| DGCR5      | -0.172530182 | 0.000996829 | 0.002209198 |
| POU5F1B    | 0.17251965   | 0.000997552 | 0.002210555 |
| CDK15      | -0.17250854  | 0.000998316 | 0.002212    |
| KIAA0141   | -0.172499008 | 0.000998971 | 0.002213206 |
| SBDS       | -0.172464884 | 0.001001321 | 0.002218164 |
| SLC25A38   | 0.172461806  | 0.001001533 | 0.002218388 |
| FOXE3      | 0.172452638  | 0.001002165 | 0.002219541 |
| ADA        | 0.172449453  | 0.001002385 | 0.002219579 |
| IRF7       | 0.17244916   | 0.001002405 | 0.002219579 |
| SYS1-DBND  | -0.172446635 | 0.001002579 | 0.002219718 |
| CYB5R3     | -0.172443955 | 0.001002764 | 0.002219763 |
| MYLK2      | 0.17244311   | 0.001002822 | 0.002219763 |
| ZC3H10     | 0.172378045  | 0.001007323 | 0.002229476 |
| BGN        | -0.172363249 | 0.001008349 | 0.002231499 |
| CXCL14     | -0.172350367 | 0.001009243 | 0.002233229 |
| PRM1       | 0.17232855   | 0.001010758 | 0.002236335 |
| GDPD1      | -0.172304863 | 0.001012406 | 0.002239733 |
| SLC20A2    | -0.172243033 | 0.00101672  | 0.002249026 |
| MS4A14     | -0.172227345 | 0.001017817 | 0.002251203 |
| IL28RA     | -0.172219156 | 0.00101839  | 0.00225222  |
| AFMID      | 0.17220656   | 0.001019273 | 0.002253921 |
| TMEM116    | 0.172169059  | 0.001021903 | 0.002259487 |
| CCR10      | 0.172138653  | 0.001024041 | 0.002263962 |
| MSL1       | -0.172131493 | 0.001024545 | 0.002264825 |
| CBR3       | 0.172110415  | 0.001026029 | 0.002267855 |
| LPAR6      | -0.172090415 | 0.00102744  | 0.002270722 |
| RHOXF2B    | 0.17207746   | 0.001028355 | 0.002272491 |
| LOC440905  | 0.172060217  | 0.001029574 | 0.002274932 |
| PLA2G16    | 0.172019152  | 0.001032481 | 0.002281104 |

|           |              |             |             |
|-----------|--------------|-------------|-------------|
| CDA       | -0.172001838 | 0.00103371  | 0.002283564 |
| CORO1C    | -0.171977039 | 0.001035471 | 0.002287202 |
| BEND6     | -0.171962114 | 0.001036533 | 0.002289292 |
| DIMT1L    | -0.171947136 | 0.001037599 | 0.002291393 |
| ALDH1B1   | -0.171933599 | 0.001038564 | 0.002293269 |
| HIST1H2AL | 0.171911395  | 0.001040148 | 0.002296512 |
| EPHA8     | 0.171905614  | 0.00104056  | 0.002297169 |
| RSP01     | -0.171900761 | 0.001040907 | 0.002297679 |
| ARMCX1    | -0.171892171 | 0.001041521 | 0.002298779 |
| AGAP1     | -0.171833958 | 0.001045689 | 0.002307724 |
| ARHGAP1   | -0.171825353 | 0.001046307 | 0.002308831 |
| EIF1AX    | -0.171818726 | 0.001046782 | 0.002309624 |
| HSD3B2    | -0.171808055 | 0.001047549 | 0.002311059 |
| HEXIM1    | -0.171792396 | 0.001048675 | 0.002313287 |
| C1orf112  | 0.171784721  | 0.001049227 | 0.002314248 |
| QPRT      | 0.171769796  | 0.001050301 | 0.002316362 |
| GTSE1     | 0.171754923  | 0.001051373 | 0.002318469 |
| FAM13AOS  | -0.171740312 | 0.001052427 | 0.002320536 |
| TMEM178   | -0.171674709 | 0.001057171 | 0.002330738 |
| LILRB5    | -0.171651095 | 0.001058883 | 0.002334255 |
| KIAA0895  | -0.171644208 | 0.001059383 | 0.002335098 |
| NRAP      | -0.171641322 | 0.001059593 | 0.002335302 |
| ACTN1     | -0.171636423 | 0.001059948 | 0.002335827 |
| MGEA5     | -0.17160991  | 0.001061876 | 0.002339816 |
| OR2B2     | 0.171531431  | 0.0010676   | 0.002352169 |
| KRTAP19-1 | 0.171515079  | 0.001068796 | 0.002354544 |
| GPR137B   | -0.171506509 | 0.001069424 | 0.002355528 |
| AKR1C4    | 0.171505748  | 0.001069479 | 0.002355528 |
| TMEM71    | -0.171485006 | 0.001071    | 0.002358615 |
| ANGEL2    | -0.171462814 | 0.001072628 | 0.00236194  |
| FASTKD1   | -0.171447511 | 0.001073753 | 0.002364155 |
| CPZ       | -0.171423834 | 0.001075494 | 0.002367728 |
| RPS4Y2    | 0.171418439  | 0.001075891 | 0.002368341 |
| ISLR      | -0.171409944 | 0.001076517 | 0.002369456 |
| ST3GAL2   | -0.171407133 | 0.001076724 | 0.00236965  |
| ATL3      | -0.17140361  | 0.001076984 | 0.00236996  |
| TOP2A     | 0.17138658   | 0.00107824  | 0.002372462 |
| TYW1      | -0.171298969 | 0.001084723 | 0.002386462 |
| HNRNPUL2  | -0.171285107 | 0.001085752 | 0.002388462 |
| ENPP4     | -0.17126739  | 0.001087068 | 0.002391094 |
| C2orf16   | -0.171250788 | 0.001088303 | 0.002393546 |
| KCNQ5     | -0.171243274 | 0.001088863 | 0.002394512 |
| MME       | -0.171231078 | 0.001089771 | 0.002396245 |
| AQP5      | 0.171226974  | 0.001090077 | 0.002396653 |
| KITLG     | -0.171156823 | 0.001095317 | 0.002407909 |
| PLEKHA8   | 0.171150954  | 0.001095757 | 0.002408609 |

|           |              |             |             |
|-----------|--------------|-------------|-------------|
| TCEB3     | -0.171148128 | 0.001095968 | 0.002408808 |
| SCFD2     | -0.171140033 | 0.001096575 | 0.002409875 |
| XPNPEP1   | 0.171106433  | 0.001099096 | 0.002415149 |
| FAM40B    | -0.171100067 | 0.001099574 | 0.002415933 |
| CCBP2     | -0.171085597 | 0.001100662 | 0.002418056 |
| PDP1      | -0.171073321 | 0.001101585 | 0.002419818 |
| CIR1      | 0.171066837  | 0.001102073 | 0.002420623 |
| ZNF813    | -0.171044883 | 0.001103727 | 0.002423989 |
| C21orf33  | 0.171034216  | 0.001104532 | 0.002425488 |
| TDRD7     | -0.171031944 | 0.001104703 | 0.002425597 |
| SLC22A6   | 0.170995128  | 0.001107485 | 0.002431436 |
| PLK1S1    | 0.170949604  | 0.001110933 | 0.002438606 |
| TP53TG3B  | 0.170948778  | 0.001110995 | 0.002438606 |
| USHBP1    | -0.170938483 | 0.001111777 | 0.002440052 |
| FOXI2     | -0.170920934 | 0.001113109 | 0.002442708 |
| MBOAT2    | -0.17087137  | 0.001116881 | 0.002450715 |
| C19orf26  | -0.17086255  | 0.001117554 | 0.002451921 |
| IFNGR1    | -0.170772607 | 0.001124433 | 0.002466741 |
| FAM177A1  | -0.170676953 | 0.001131791 | 0.002482611 |
| LMNB2     | 0.170672651  | 0.001132123 | 0.002483065 |
| SPINK1    | 0.170668496  | 0.001132444 | 0.002483495 |
| SAG       | 0.170660434  | 0.001133066 | 0.002484587 |
| ISG20     | 0.170584079  | 0.001138978 | 0.002497275 |
| MAB21L1   | -0.170580207 | 0.001139279 | 0.002497659 |
| XPNPEP2   | 0.170576333  | 0.00113958  | 0.002498044 |
| KATNA1    | 0.170562112  | 0.001140684 | 0.00250019  |
| ZNF226    | 0.170538747  | 0.001142501 | 0.002503735 |
| LOC401127 | -0.170538086 | 0.001142553 | 0.002503735 |
| SNN       | -0.170526954 | 0.00114342  | 0.002505358 |
| VPS54     | -0.170508412 | 0.001144865 | 0.002508249 |
| FRG1B     | -0.170484526 | 0.001146729 | 0.002512056 |
| TADA1     | -0.17046339  | 0.00114838  | 0.002515398 |
| SEC1      | -0.170458702 | 0.001148747 | 0.002515924 |
| MEIS2     | -0.170455699 | 0.001148982 | 0.002516162 |
| HIST1H2AG | -0.170384682 | 0.001154551 | 0.002528079 |
| NAPA      | 0.17036167   | 0.00115636  | 0.002531763 |
| ADIG      | 0.170348086  | 0.00115743  | 0.002533826 |
| MYCNOS    | 0.170338531  | 0.001158183 | 0.002534977 |
| KIAA1522  | 0.170338182  | 0.00115821  | 0.002534977 |
| TAC3      | 0.170319881  | 0.001159653 | 0.002537857 |
| PLIN3     | 0.170312702  | 0.00116022  | 0.002538818 |
| MNDA      | -0.17031078  | 0.001160372 | 0.002538871 |
| RRAS      | 0.170273867  | 0.001163289 | 0.002544975 |
| PRAME     | 0.170238693  | 0.001166076 | 0.002550791 |
| RNF167    | 0.170219774  | 0.001167577 | 0.002553795 |
| HCG9      | 0.170216884  | 0.001167807 | 0.002553992 |

|           |              |             |             |
|-----------|--------------|-------------|-------------|
| CCL3      | 0.17021541   | 0.001167924 | 0.002553992 |
| VMAC      | 0.170193865  | 0.001169636 | 0.002557455 |
| DLEU7     | -0.170191544 | 0.001169821 | 0.002557578 |
| C2orf40   | -0.170183176 | 0.001170487 | 0.002558753 |
| RPS6KA6   | -0.170178515 | 0.001170858 | 0.002559283 |
| PFKFB2    | -0.170120887 | 0.001175453 | 0.002569047 |
| PIP5K1C   | -0.170107185 | 0.001176549 | 0.002571158 |
| PAK3      | -0.170099193 | 0.001177188 | 0.002572273 |
| IL12B     | -0.170054882 | 0.001180738 | 0.002579747 |
| CATSPER2  | 0.170046851  | 0.001181382 | 0.002580872 |
| FAM120C   | -0.170044672 | 0.001181557 | 0.002580971 |
| SLC19A2   | -0.170042049 | 0.001181768 | 0.002581148 |
| GBA       | 0.170012863  | 0.001184113 | 0.002585987 |
| SPTLC1    | -0.169988717 | 0.001186057 | 0.002589948 |
| KIAA1875  | 0.16992268   | 0.001191388 | 0.002601303 |
| CKAP5     | -0.169884621 | 0.00119447  | 0.002607747 |
| NBN       | -0.169880945 | 0.001194768 | 0.002608112 |
| IL16      | -0.169877954 | 0.001195011 | 0.002608356 |
| SPAG6     | 0.169813881  | 0.001200218 | 0.002619028 |
| C1orf161  | -0.169813617 | 0.00120024  | 0.002619028 |
| C5orf13   | 0.169812945  | 0.001200295 | 0.002619028 |
| TAP1      | 0.16980766   | 0.001200725 | 0.00261968  |
| DRD4      | 0.169802066  | 0.001201181 | 0.002620388 |
| AP1M1     | 0.169746522  | 0.001205716 | 0.002629992 |
| ASCC2     | 0.169741155  | 0.001206155 | 0.002630662 |
| MIPEP     | -0.169695651 | 0.001209883 | 0.002638504 |
| DEPDC1    | 0.169681329  | 0.001211059 | 0.002640779 |
| CNR2      | -0.169676776 | 0.001211432 | 0.002641305 |
| PTP4A3    | 0.169672952  | 0.001211747 | 0.002641701 |
| ZNF189    | -0.169658939 | 0.001212898 | 0.002643922 |
| LAP3      | -0.169642792 | 0.001214227 | 0.002646528 |
| C12orf53  | -0.169638053 | 0.001214617 | 0.002647089 |
| SH3D20    | -0.169615248 | 0.001216496 | 0.002650894 |
| AIMP2     | 0.169561945  | 0.001220899 | 0.002660197 |
| GPR146    | -0.169549987 | 0.001221888 | 0.002662062 |
| C10orf26  | -0.169514505 | 0.001224829 | 0.002668177 |
| KRT78     | 0.169454092  | 0.001229852 | 0.002678825 |
| HSPA1L    | 0.169440873  | 0.001230953 | 0.002680931 |
| ACER1     | -0.169382046 | 0.001235866 | 0.002691336 |
| RFX5      | -0.169332292 | 0.001240035 | 0.00270012  |
| PPIL5     | 0.16931606   | 0.001241398 | 0.002702792 |
| STON1-GTF | -0.169302616 | 0.001242528 | 0.002704956 |
| LZTFL1    | -0.169288043 | 0.001243754 | 0.002707329 |
| ZNF675    | -0.169250524 | 0.001246915 | 0.002713913 |
| LOC440925 | 0.169200476  | 0.001251143 | 0.002722819 |
| C12orf42  | 0.169198217  | 0.001251334 | 0.002722937 |

|           |              |             |             |
|-----------|--------------|-------------|-------------|
| GALNTL4   | -0.169185755 | 0.001252389 | 0.002724935 |
| C1orf177  | 0.169159439  | 0.00125462  | 0.00272949  |
| ANKRD34C  | -0.169155893 | 0.001254921 | 0.002729672 |
| C4BPB     | 0.169155224  | 0.001254977 | 0.002729672 |
| C19orf21  | 0.169151574  | 0.001255287 | 0.002730047 |
| TMEM108   | -0.169145267 | 0.001255823 | 0.002730914 |
| RPL10L    | 0.169115417  | 0.001258359 | 0.002736131 |
| ARNTL2    | -0.169051838 | 0.001263778 | 0.002747614 |
| AMZ2P1    | 0.169023983  | 0.001266159 | 0.00275249  |
| DECR2     | 0.169019307  | 0.001266559 | 0.002753059 |
| SSX4      | 0.169004528  | 0.001267825 | 0.002755509 |
| CNGB3     | 0.168947911  | 0.001272682 | 0.002765765 |
| CCL24     | -0.168925514 | 0.001274609 | 0.002769649 |
| BTBD18    | -0.168903432 | 0.001276511 | 0.002773479 |
| DUSP15    | 0.168883249  | 0.001278251 | 0.002776958 |
| C1orf49   | 0.16887432   | 0.001279022 | 0.00277833  |
| GAGE2A    | 0.16885237   | 0.001280919 | 0.002782146 |
| FANCA     | 0.168823463  | 0.001283421 | 0.002787276 |
| UNC45A    | 0.16879384   | 0.001285989 | 0.002792549 |
| LOC442421 | -0.168745105 | 0.001290224 | 0.002801441 |
| PADI2     | -0.168675074 | 0.001296333 | 0.002814398 |
| KLK11     | -0.168667648 | 0.001296983 | 0.002815501 |
| FUT4      | -0.168604272 | 0.001302536 | 0.002827249 |
| CLIP3     | -0.168589828 | 0.001303805 | 0.002829695 |
| PICK1     | 0.168586708  | 0.001304079 | 0.002829982 |
| ATP1B2    | -0.16855729  | 0.001306668 | 0.00283529  |
| MYO16     | -0.168535218 | 0.001308613 | 0.002839201 |
| SLC35B4   | -0.168512429 | 0.001310624 | 0.002843254 |
| ANXA2P3   | 0.168487893  | 0.001312792 | 0.002847587 |
| LPL       | -0.168486594 | 0.001312907 | 0.002847587 |
| CLIC6     | -0.168464445 | 0.001314867 | 0.002851528 |
| BLOC1S2   | 0.168408369  | 0.001319842 | 0.002862006 |
| RTN3      | 0.168396355  | 0.001320911 | 0.00286401  |
| VPS53     | -0.168368159 | 0.001323421 | 0.00286914  |
| VCY       | 0.168365192  | 0.001323685 | 0.002869401 |
| FAM55C    | -0.168222611 | 0.001336447 | 0.002896751 |
| LAMA3     | -0.168191348 | 0.00133926  | 0.002902533 |
| TUBA3C    | 0.168169987  | 0.001341186 | 0.002906389 |
| RPGRIP1L  | -0.168103164 | 0.001347225 | 0.00291916  |
| CH25H     | -0.168070586 | 0.001350179 | 0.002925241 |
| GIPC3     | -0.168060692 | 0.001351077 | 0.002926869 |
| LOC100129 | -0.168043708 | 0.00135262  | 0.002929893 |
| LOC646627 | 0.168031184  | 0.001353759 | 0.002931892 |
| RAB28     | -0.168030322 | 0.001353838 | 0.002931892 |
| RNF183    | 0.168016837  | 0.001355065 | 0.002934231 |
| HIST1H2BG | 0.168008501  | 0.001355824 | 0.002935555 |



|           |              |             |             |
|-----------|--------------|-------------|-------------|
| MR1       | -0.168000266 | 0.001356575 | 0.002936861 |
| JMJD8     | 0.167981237  | 0.00135831  | 0.002939986 |
| MEIG1     | 0.167981197  | 0.001358314 | 0.002939986 |
| CDRT1     | 0.167939216  | 0.00136215  | 0.002947969 |
| TMEM70    | 0.167932674  | 0.001362748 | 0.002948944 |
| LOC100303 | -0.167929244 | 0.001363062 | 0.002949303 |
| MDM4      | -0.167865739 | 0.001368887 | 0.002961379 |
| CYP2A6    | -0.167865155 | 0.001368941 | 0.002961379 |
| TNFSF11   | -0.167847985 | 0.00137052  | 0.002964473 |
| RNF14     | -0.16783691  | 0.001371539 | 0.002966356 |
| REG1A     | 0.167791017  | 0.00137577  | 0.002975184 |
| LOC100129 | -0.16778763  | 0.001376083 | 0.002975402 |
| FAM19A1   | -0.16778669  | 0.00137617  | 0.002975402 |
| SMOX      | 0.167755403  | 0.001379062 | 0.002981331 |
| RAB1B     | 0.167703891  | 0.001383837 | 0.002991328 |
| FXYD3     | 0.167698222  | 0.001384363 | 0.002991971 |
| APOE      | 0.167697452  | 0.001384434 | 0.002991971 |
| TBC1D3H   | -0.167627525 | 0.001390942 | 0.003005709 |
| EIF1B     | 0.167593223  | 0.001394145 | 0.003012302 |
| TSGA10IP  | 0.167575603  | 0.001395792 | 0.003015455 |
| CD163     | -0.167574379 | 0.001395907 | 0.003015455 |
| CCDC155   | 0.167566539  | 0.001396641 | 0.003016713 |
| AKNAD1    | 0.167564823  | 0.001396801 | 0.003016733 |
| LOC121838 | -0.167533839 | 0.001399705 | 0.003022676 |
| CHID1     | 0.167529215  | 0.001400139 | 0.003023278 |
| GIP       | 0.167527633  | 0.001400287 | 0.003023278 |
| HEXB      | 0.167520875  | 0.001400921 | 0.00302432  |
| REXO1     | -0.167507186 | 0.001402207 | 0.003026767 |
| C11orf20  | 0.167503873  | 0.001402518 | 0.003027111 |
| MED18     | 0.167486656  | 0.001404137 | 0.003030277 |
| ZNF782    | -0.167474721 | 0.001405261 | 0.003032372 |
| FAM69B    | 0.167464866  | 0.001406189 | 0.003034046 |
| NRL       | 0.167460096  | 0.001406638 | 0.003034687 |
| ZNF831    | -0.167455426 | 0.001407078 | 0.003035308 |
| FLVCR1    | 0.167423045  | 0.001410133 | 0.003041569 |
| RHOD      | 0.167392297  | 0.00141304  | 0.003047508 |
| PTPRCAP   | 0.167350337  | 0.001417016 | 0.003055752 |
| LOC644538 | -0.167329549 | 0.001418989 | 0.003059676 |
| NEGR1     | -0.16728688  | 0.001423047 | 0.003068095 |
| GRIA3     | -0.167283267 | 0.001423392 | 0.003068505 |
| HERPUD1   | -0.167261    | 0.001425514 | 0.003072748 |
| SH2D4A    | -0.167243162 | 0.001427217 | 0.003076085 |
| CHIC1     | -0.167237445 | 0.001427763 | 0.003076929 |
| E2F4      | 0.167228256  | 0.001428641 | 0.003078488 |
| CARNS1    | -0.167221579 | 0.001429279 | 0.00307953  |
| MBD4      | -0.167218389 | 0.001429584 | 0.003079854 |

|           |              |             |             |
|-----------|--------------|-------------|-------------|
| GABARAPL2 | 0.167162384  | 0.00143495  | 0.003091079 |
| C17orf76  | -0.167155552 | 0.001435606 | 0.003092157 |
| MTRF1     | -0.167143587 | 0.001436755 | 0.003094298 |
| LGI1      | -0.167129211 | 0.001438137 | 0.003096939 |
| ADD3      | -0.16712109  | 0.001438918 | 0.003098286 |
| C1orf198  | -0.167074886 | 0.00144337  | 0.003107536 |
| SAMSN1    | -0.16706718  | 0.001444113 | 0.003108801 |
| FOXJ1     | 0.167050817  | 0.001445694 | 0.003111867 |
| TRIM42    | 0.167047449  | 0.001446019 | 0.003112231 |
| NARS      | -0.167027216 | 0.001447976 | 0.003116106 |
| PREP      | -0.166987504 | 0.001451824 | 0.003123755 |
| SQLE      | 0.166987294  | 0.001451844 | 0.003123755 |
| ADCK1     | 0.16694107   | 0.001456334 | 0.003133078 |
| HOXD10    | 0.166838615  | 0.001466333 | 0.003154247 |
| HELQ      | -0.166832673 | 0.001466915 | 0.003155158 |
| PSMD1     | 0.16681061   | 0.001469077 | 0.003159467 |
| IL17RB    | 0.166790872  | 0.001471013 | 0.003163284 |
| LPAR5     | -0.166789283 | 0.001471169 | 0.003163284 |
| B2M       | -0.166784626 | 0.001471627 | 0.003163926 |
| CFI       | -0.166781311 | 0.001471953 | 0.003164285 |
| TIGD6     | 0.166756946  | 0.001474348 | 0.003169092 |
| ZNF77     | -0.166747911 | 0.001475237 | 0.003170661 |
| RAI14     | -0.166734389 | 0.001476569 | 0.003173181 |
| FOXN4     | -0.166727296 | 0.001477268 | 0.00317434  |
| AGAP3     | 0.166712033  | 0.001478773 | 0.003177232 |
| SEC14L2   | -0.166658568 | 0.001484056 | 0.003188239 |
| ASNS      | 0.166636073  | 0.001486284 | 0.003192682 |
| CALCOCO2  | -0.166624159 | 0.001487466 | 0.003194875 |
| ICAM3     | 0.166598775  | 0.001489985 | 0.003199941 |
| LOC153910 | 0.166542534  | 0.001495582 | 0.003211615 |
| RGAG1     | -0.166533772 | 0.001496456 | 0.003213145 |
| SMPD4     | 0.166512007  | 0.001498628 | 0.003217462 |
| AMN1      | -0.166472919 | 0.001502537 | 0.003225506 |
| CYCSP52   | -0.166439259 | 0.00150591  | 0.003232398 |
| STK32C    | 0.166427269  | 0.001507113 | 0.003234632 |
| RNASE4    | -0.166414689 | 0.001508376 | 0.003236995 |
| FAM134A   | 0.166391436  | 0.001510714 | 0.003241663 |
| METAP1    | -0.166379559 | 0.00151191  | 0.003243878 |
| C12orf71  | -0.166326819 | 0.001517228 | 0.003254939 |
| SNORA45   | 0.166310377  | 0.00151889  | 0.003258153 |
| CRYGC     | 0.166307594  | 0.001519171 | 0.003258405 |
| HLA-H     | 0.166250299  | 0.001524975 | 0.003270502 |
| FGFR2     | -0.166236124 | 0.001526414 | 0.003273236 |
| CDH6      | -0.166209609 | 0.00152911  | 0.003278329 |
| PRPF4B    | -0.166209522 | 0.001529119 | 0.003278329 |
| LONRF2    | -0.166117957 | 0.00153846  | 0.003298001 |

|           |              |             |             |
|-----------|--------------|-------------|-------------|
| CUX1      | -0.166103221 | 0.001539968 | 0.003300879 |
| TNFSF9    | 0.166096961  | 0.001540609 | 0.003301898 |
| ESRRG     | -0.166082096 | 0.001542133 | 0.003304807 |
| TASP1     | -0.166047387 | 0.001545695 | 0.003312085 |
| SP100     | -0.166034748 | 0.001546994 | 0.003314512 |
| ZNF571    | -0.166027557 | 0.001547734 | 0.00331574  |
| NUDT18    | 0.166005121  | 0.001550043 | 0.003320179 |
| ZNF221    | -0.16600419  | 0.001550139 | 0.003320179 |
| C9orf109  | 0.165980413  | 0.00155259  | 0.003325071 |
| SEPT7P2   | -0.165977189 | 0.001552923 | 0.003325426 |
| VIPR2     | -0.165947224 | 0.001556018 | 0.003331695 |
| NKAIN2    | 0.165927482  | 0.00155806  | 0.003335709 |
| GGCX      | -0.165913498 | 0.001559508 | 0.00333845  |
| ZBTB25    | -0.165845708 | 0.001566545 | 0.003353153 |
| C15orf34  | -0.165832894 | 0.001567878 | 0.003355646 |
| SAPS1     | 0.165792498  | 0.001572088 | 0.003364296 |
| BBS12     | -0.165754713 | 0.001576036 | 0.003372381 |
| PRKCG     | 0.165725306  | 0.001579114 | 0.003378606 |
| PRR22     | 0.165710215  | 0.001580696 | 0.003381627 |
| SET       | 0.165707873  | 0.001580942 | 0.003381789 |
| OR5AK2    | -0.165704511 | 0.001581295 | 0.00338218  |
| NINL      | -0.165699476 | 0.001581823 | 0.003382947 |
| C17orf91  | -0.165673541 | 0.001584547 | 0.003388408 |
| TCERG1    | -0.165669306 | 0.001584992 | 0.003388997 |
| SDR42E1   | -0.165652333 | 0.001586777 | 0.00339245  |
| FABP6     | 0.165626087  | 0.001589542 | 0.003397996 |
| SCGN      | 0.165608654  | 0.001591381 | 0.003401561 |
| C3orf58   | -0.165598091 | 0.001592496 | 0.003403579 |
| LOC643719 | 0.165580696  | 0.001594333 | 0.003407141 |
| ZNF697    | -0.165536387 | 0.001599023 | 0.003416797 |
| ASGR1     | 0.16550107   | 0.001602771 | 0.003424437 |
| RAB8A     | -0.16548327  | 0.001604662 | 0.003428111 |
| PAIP2B    | -0.165480511 | 0.001604956 | 0.00342837  |
| CDK20     | -0.16547616  | 0.001605419 | 0.003428991 |
| CACNG4    | 0.165404413  | 0.001613068 | 0.003444959 |
| PHF23     | 0.165377669  | 0.001615927 | 0.003450696 |
| ZNF594    | -0.165355277 | 0.001618325 | 0.003455446 |
| STK10     | -0.165312869 | 0.001622876 | 0.003464791 |
| RAB5C     | -0.16529567  | 0.001624725 | 0.003468366 |
| LTB       | 0.165276066  | 0.001626834 | 0.003472498 |
| IQCF1     | 0.165235986  | 0.001631155 | 0.003481348 |
| POM121L4P | -0.165222393 | 0.001632623 | 0.003484107 |
| CNGA4     | -0.16521452  | 0.001633474 | 0.003485549 |
| FAM153B   | -0.165180899 | 0.001637111 | 0.003492937 |
| LOXL3     | -0.165165894 | 0.001638737 | 0.003496031 |
| RGS9BP    | 0.165162068  | 0.001639152 | 0.003496362 |

|           |              |             |             |
|-----------|--------------|-------------|-------------|
| MBD6      | -0.165161224 | 0.001639244 | 0.003496362 |
| SPPL2A    | -0.165127127 | 0.001642945 | 0.003503881 |
| RIBC1     | 0.16512398   | 0.001643287 | 0.003504235 |
| EDN1      | -0.165112659 | 0.001644517 | 0.003506484 |
| PLA2G5    | -0.16509417  | 0.001646529 | 0.003510398 |
| ZSWIM5    | 0.165078256  | 0.001648263 | 0.003513718 |
| MAGEA3    | 0.165053922  | 0.001650916 | 0.003518998 |
| JUP       | 0.165035493  | 0.001652929 | 0.003522911 |
| PCDHA11   | -0.165024455 | 0.001654135 | 0.003525105 |
| C17orf75  | 0.164989436  | 0.001657968 | 0.003532895 |
| SETD8     | 0.16498009   | 0.001658992 | 0.003534354 |
| SMAGP     | 0.164979949  | 0.001659008 | 0.003534354 |
| LTB4R     | -0.164975639 | 0.00165948  | 0.003534983 |
| PRKX      | -0.164946593 | 0.001662668 | 0.003541395 |
| NR6A1     | -0.164906422 | 0.001667086 | 0.003550425 |
| CDC14A    | -0.164839751 | 0.001674443 | 0.003565711 |
| ZNF235    | -0.164820051 | 0.001676622 | 0.003569971 |
| GPA33     | -0.164814892 | 0.001677194 | 0.003570805 |
| KDM5B     | -0.164795716 | 0.001679318 | 0.003574946 |
| ELMOD1    | -0.164786933 | 0.001680292 | 0.003576637 |
| ANXA9     | 0.164759328  | 0.001683357 | 0.003582693 |
| WDR5      | 0.164758066  | 0.001683497 | 0.003582693 |
| SEMA3D    | -0.164754144 | 0.001683933 | 0.003583237 |
| CAMK2G    | -0.164709557 | 0.001688895 | 0.003593412 |
| USP3      | -0.164701944 | 0.001689743 | 0.003594833 |
| C16orf88  | 0.164680646  | 0.001692119 | 0.003599503 |
| LOC647859 | -0.164672029 | 0.001693081 | 0.003601166 |
| VEZF1     | -0.164658349 | 0.00169461  | 0.003604032 |
| TACSTD2   | -0.164636732 | 0.001697028 | 0.003608789 |
| PRM2      | 0.164601425  | 0.001700984 | 0.003616816 |
| XRCC6BP1  | 0.164580566  | 0.001703325 | 0.003621407 |
| SPAST     | -0.164561825 | 0.001705431 | 0.003625497 |
| SLC4A1    | -0.164557105 | 0.001705962 | 0.003626239 |
| ANKRD20A3 | -0.164515113 | 0.001710691 | 0.003635535 |
| ZW10      | -0.164515024 | 0.001710701 | 0.003635535 |
| LGALS1    | 0.164452129  | 0.001717806 | 0.003650246 |
| TBC1D1    | -0.164444265 | 0.001718696 | 0.003651748 |
| BATF      | 0.164436923  | 0.001719528 | 0.003653125 |
| ZNF766    | 0.164405954  | 0.001723039 | 0.003660195 |
| VMO1      | 0.164396607  | 0.0017241   | 0.003661978 |
| HRH3      | 0.164395321  | 0.001724246 | 0.003661978 |
| NPFFR2    | 0.164387294  | 0.001725158 | 0.003663524 |
| TLX1      | 0.164380565  | 0.001725923 | 0.003664757 |
| DSG2      | -0.164356848 | 0.001728621 | 0.003670095 |
| F2RL3     | -0.164300367 | 0.001735061 | 0.003683376 |
| CCDC153   | 0.164274466  | 0.001738022 | 0.003689268 |

|           |              |             |             |
|-----------|--------------|-------------|-------------|
| SOCS7     | -0.16426177  | 0.001739475 | 0.003691959 |
| TRPC2     | 0.164245126  | 0.001741382 | 0.003695612 |
| ABCC11    | -0.164205218 | 0.001745961 | 0.003704935 |
| SETMAR    | 0.164136263  | 0.001753899 | 0.003721383 |
| C10orf72  | -0.164119112 | 0.001755879 | 0.003725186 |
| TTC36     | -0.164116946 | 0.001756129 | 0.00372532  |
| KLHL18    | -0.164100688 | 0.001758007 | 0.003728908 |
| F11R      | -0.164085896 | 0.001759718 | 0.003732139 |
| LOC340508 | 0.1640531    | 0.001763517 | 0.003739797 |
| GCNT2     | 0.164041276  | 0.001764888 | 0.003742307 |
| ROBO3     | 0.16402395   | 0.001766899 | 0.003746173 |
| NAA40     | -0.163978689 | 0.001772163 | 0.003756933 |
| ATG9B     | 0.163931816  | 0.001777629 | 0.00376812  |
| IFIT1B    | -0.163910044 | 0.001780174 | 0.003773112 |
| NME5      | -0.163904418 | 0.001780832 | 0.003774105 |
| IGF2BP3   | 0.163885717  | 0.001783021 | 0.003778342 |
| CCDC147   | -0.163882701 | 0.001783374 | 0.003778688 |
| NRXN3     | -0.163867954 | 0.001785102 | 0.003781948 |
| LRMP      | -0.163855502 | 0.001786562 | 0.003784639 |
| API52     | -0.163851685 | 0.00178701  | 0.003785185 |
| ACADL     | -0.163831791 | 0.001789346 | 0.00378973  |
| GPR27     | -0.163816095 | 0.001791191 | 0.003792859 |
| HSPB7     | -0.163815982 | 0.001791205 | 0.003792859 |
| RNF186    | 0.163769437  | 0.001796686 | 0.003804062 |
| MYOM3     | -0.163754335 | 0.001798468 | 0.003807429 |
| PRSS30P   | 0.163737399  | 0.001800468 | 0.003811258 |
| PDIA3P    | -0.163733204 | 0.001800964 | 0.003811903 |
| SERPINB8  | -0.16373026  | 0.001801312 | 0.003812234 |
| SCARF2    | -0.163657479 | 0.001809934 | 0.003830075 |
| PRO0611   | -0.163653889 | 0.00181036  | 0.00383057  |
| DLGAP3    | 0.163609126  | 0.001815683 | 0.003841425 |
| SPSB3     | 0.163604306  | 0.001816257 | 0.003842231 |
| CTLA4     | 0.16355512   | 0.001822124 | 0.003854233 |
| SCT       | 0.163553475  | 0.001822321 | 0.003854239 |
| BEND4     | -0.163512799 | 0.001827186 | 0.00386412  |
| SLC13A1   | -0.163496667 | 0.001829119 | 0.003867797 |
| NR5A1     | 0.163467959  | 0.001832564 | 0.003874669 |
| TLR10     | -0.163457731 | 0.001833792 | 0.003876855 |
| ABHD12B   | -0.163455007 | 0.00183412  | 0.003877135 |
| DIAPH3    | 0.16344543   | 0.001835271 | 0.003879158 |
| PSD       | -0.163436922 | 0.001836294 | 0.003880909 |
| CUL1      | -0.163431301 | 0.001836971 | 0.003881926 |
| C15orf29  | -0.163386193 | 0.001842407 | 0.003893001 |
| HBQ1      | 0.163360095  | 0.001845559 | 0.003899247 |
| FGFR3     | 0.16333458   | 0.001848645 | 0.003905353 |
| PINX1     | 0.163323572  | 0.001849978 | 0.003907754 |

|           |              |             |             |
|-----------|--------------|-------------|-------------|
| TMED6     | 0.163321737  | 0.0018502   | 0.003907809 |
| PIAS4     | -0.163301062 | 0.001852706 | 0.003912688 |
| UTP15     | -0.163283971 | 0.00185478  | 0.003916652 |
| GLIPR1    | -0.16327583  | 0.001855769 | 0.003918325 |
| ZNF10     | -0.163267887 | 0.001856734 | 0.003919947 |
| KRTAP26-1 | 0.16322657   | 0.001861762 | 0.003930145 |
| SFT2D3    | 0.163223922  | 0.001862084 | 0.003930409 |
| MEN1      | 0.163221943  | 0.001862326 | 0.003930502 |
| AMPD3     | -0.163152072 | 0.001870859 | 0.003948092 |
| C7orf28A  | 0.163149124  | 0.001871219 | 0.003948209 |
| CCDC150   | 0.16314838   | 0.00187131  | 0.003948209 |
| C2orf61   | -0.163071042 | 0.001880799 | 0.003967808 |
| DDX1      | 0.163060268  | 0.001882124 | 0.003970184 |
| PMS2L11   | -0.163050239 | 0.001883359 | 0.003972367 |
| MCART1    | -0.163027528 | 0.001886157 | 0.003977848 |
| KCTD10    | -0.162998595 | 0.001889727 | 0.003984956 |
| SFRP2     | -0.162980337 | 0.001891984 | 0.003989291 |
| SEC23B    | -0.162961594 | 0.001894302 | 0.003993757 |
| MTHFSD    | 0.162958689  | 0.001894662 | 0.003994092 |
| AP1S3     | -0.162881683 | 0.001904218 | 0.004013812 |
| TBXA2R    | -0.162865454 | 0.001906237 | 0.004017527 |
| RFPL4B    | 0.162863374  | 0.001906496 | 0.004017527 |
| WDR33     | 0.162862654  | 0.001906586 | 0.004017527 |
| CCDC28B   | 0.162848661  | 0.001908329 | 0.004020775 |
| STARD10   | 0.16283658   | 0.001909835 | 0.004023522 |
| TPRG1     | -0.16282231  | 0.001911615 | 0.004026847 |
| SRGN      | -0.162815651 | 0.001912446 | 0.004028172 |
| C19orf34  | -0.162812293 | 0.001912866 | 0.004028629 |
| NOTCH2NL  | 0.162763492  | 0.001918969 | 0.004041057 |
| SCN2B     | -0.162751632 | 0.001920455 | 0.004043759 |
| PAGE2     | 0.162737654  | 0.001922208 | 0.004047021 |
| PROX2     | -0.162708187 | 0.001925908 | 0.004054382 |
| SYT3      | -0.162694028 | 0.001927688 | 0.004057701 |
| PABPC4    | 0.162620972  | 0.001936897 | 0.004076654 |
| RGR       | 0.162614584  | 0.001937704 | 0.004077922 |
| PLA2G4E   | -0.162581241 | 0.001941922 | 0.004086366 |
| MYBPC1    | 0.162550277  | 0.001945846 | 0.004094192 |
| PROL1     | -0.162537394 | 0.001947481 | 0.004097199 |
| SFT2D1    | 0.162517176  | 0.001950049 | 0.004102169 |
| MACC1     | -0.162496015 | 0.001952741 | 0.004107397 |
| SDR39U1   | 0.162484679  | 0.001954184 | 0.004109998 |
| SYBU      | -0.162456756 | 0.001957743 | 0.004117049 |
| PRKAG1    | 0.162445601  | 0.001959166 | 0.004119607 |
| XG        | -0.162443323 | 0.001959457 | 0.004119784 |
| IL32      | 0.162408841  | 0.001963864 | 0.004128613 |
| LBXCOR1   | -0.162366543 | 0.001969282 | 0.004139567 |

|          |              |             |             |
|----------|--------------|-------------|-------------|
| SIRT5    | 0.162331354  | 0.0019738   | 0.004148626 |
| INHBE    | -0.162329617 | 0.001974023 | 0.004148657 |
| NUP205   | -0.162286829 | 0.00197953  | 0.004159791 |
| DVL2     | 0.162241625  | 0.001985363 | 0.004171609 |
| VSTM2B   | 0.162231803  | 0.001986633 | 0.004173836 |
| CRTAP    | 0.16216502   | 0.001995284 | 0.004191569 |
| CENPN    | 0.162156329  | 0.001996412 | 0.004193498 |
| SCARNA17 | 0.162028665  | 0.002013055 | 0.00422801  |
| PHGDH    | 0.162022858  | 0.002013815 | 0.00422916  |
| ZBTB2    | -0.161953995 | 0.002022848 | 0.004247586 |
| DNAJC11  | -0.161952717 | 0.002023016 | 0.004247586 |
| KLHDC9   | 0.161887618  | 0.002031589 | 0.004265138 |
| PTPRR    | -0.161885045 | 0.002031929 | 0.004265401 |
| EIF2B2   | 0.161845482  | 0.002037156 | 0.004275924 |
| WNK4     | 0.161842245  | 0.002037585 | 0.004276372 |
| ELOVL6   | -0.161821962 | 0.00204027  | 0.004281223 |
| SLC27A2  | -0.161821542 | 0.002040326 | 0.004281223 |
| GTSF1    | 0.16176756   | 0.002047488 | 0.0042958   |
| C1orf220 | -0.161708894 | 0.002055299 | 0.004311732 |
| SH2D2A   | 0.161706491  | 0.002055619 | 0.00431195  |
| CDH18    | 0.161682823  | 0.002058778 | 0.004318122 |
| FBXO24   | 0.161670396  | 0.002060439 | 0.00432115  |
| SPANXE   | 0.161656615  | 0.002062282 | 0.004324559 |
| NPPB     | 0.16163255   | 0.002065503 | 0.004330859 |
| ARRDC1   | 0.161608538  | 0.002068722 | 0.004337152 |
| HADH     | -0.16160096  | 0.002069739 | 0.004338827 |
| RHPN1    | 0.161583782  | 0.002072046 | 0.004343206 |
| MGC3771  | 0.161573093  | 0.002073483 | 0.00434576  |
| FAM111A  | -0.1615379   | 0.002078219 | 0.004355228 |
| CHP      | -0.161518707 | 0.002080806 | 0.004360191 |
| ZNF322B  | 0.161500104  | 0.002083317 | 0.004364992 |
| WDR67    | 0.161495217  | 0.002083977 | 0.004365916 |
| WDR73    | 0.161444508  | 0.002090836 | 0.004379825 |
| ABTB1    | 0.161432569  | 0.002092454 | 0.004382753 |
| HNRNPF   | -0.16141597  | 0.002094705 | 0.004387007 |
| TBC1D22B | 0.161410307  | 0.002095474 | 0.004388155 |
| BEAN     | -0.161392686 | 0.002097867 | 0.004392705 |
| HTATIP2  | 0.161380409  | 0.002099536 | 0.004395737 |
| ZNF829   | -0.161355377 | 0.002102942 | 0.004402406 |
| MYO15A   | -0.161336969 | 0.00210545  | 0.004407194 |
| RTN1     | -0.16129623  | 0.002111011 | 0.00441837  |
| NAT15    | 0.161260792  | 0.002115859 | 0.004428051 |
| CD96     | -0.161254921 | 0.002116663 | 0.004429269 |
| KSR1     | -0.161248116 | 0.002117596 | 0.004430602 |
| RABL3    | -0.161247025 | 0.002117745 | 0.004430602 |
| TRIM38   | -0.161222254 | 0.002121143 | 0.004437244 |

|           |              |             |             |
|-----------|--------------|-------------|-------------|
| C19orf69  | 0.161178098  | 0.002127212 | 0.004449472 |
| ZNF498    | -0.161156907 | 0.00213013  | 0.004455108 |
| DNAJC19   | 0.161127808  | 0.002134143 | 0.004463032 |
| TCIRG1    | 0.161086279  | 0.002139882 | 0.004474565 |
| C17orf60  | 0.161022109  | 0.002148778 | 0.004492695 |
| B3GAT1    | -0.161018637 | 0.00214926  | 0.00449281  |
| ZNF323    | 0.161018463  | 0.002149285 | 0.00449281  |
| COPS7A    | 0.161006298  | 0.002150975 | 0.004495872 |
| RBP7      | 0.160980415  | 0.002154576 | 0.004502926 |
| C7orf29   | 0.16097066   | 0.002155935 | 0.004505293 |
| PPP2R3C   | 0.160924332  | 0.002162398 | 0.004518325 |
| ADRA2B    | -0.1609131   | 0.002163967 | 0.00452113  |
| C13orf23  | -0.160856313 | 0.002171919 | 0.004537198 |
| TMEM62    | 0.160854924  | 0.002172114 | 0.004537198 |
| RAB11FIP5 | -0.160848663 | 0.002172992 | 0.004538557 |
| HAUS4     | 0.160836599  | 0.002174686 | 0.004541617 |
| OAF       | -0.160820099 | 0.002177004 | 0.004545982 |
| EXD3      | 0.160800472  | 0.002179764 | 0.004551268 |
| TTC13     | 0.160788369  | 0.002181468 | 0.004554348 |
| PIWIL4    | -0.160784745 | 0.002181978 | 0.004554936 |
| PCDH9     | -0.160775753 | 0.002183245 | 0.004557103 |
| RPL39L    | 0.160758003  | 0.002185748 | 0.004561849 |
| TMUB2     | 0.160754558  | 0.002186234 | 0.004562385 |
| HIST1H2AC | 0.160735962  | 0.002188859 | 0.004567386 |
| GTF2B     | 0.160715091  | 0.002191809 | 0.004572275 |
| ZP1       | 0.160714926  | 0.002191832 | 0.004572275 |
| CYP21A2   | 0.160714509  | 0.002191891 | 0.004572275 |
| C1QTNF1   | -0.160712887 | 0.002192121 | 0.004572275 |
| HEYL      | -0.160569925 | 0.002212428 | 0.004614148 |
| C9orf156  | 0.1605538    | 0.002214729 | 0.004618464 |
| ABCA4     | 0.160551856  | 0.002215007 | 0.004618559 |
| CMTM8     | 0.160518922  | 0.002219714 | 0.00462789  |
| RMND1     | 0.160502132  | 0.002222117 | 0.004632345 |
| AGPAT5    | -0.160500743 | 0.002222316 | 0.004632345 |
| ISOC1     | -0.160494901 | 0.002223153 | 0.004633605 |
| CCDC41    | -0.160471756 | 0.002226471 | 0.004640035 |
| MRPL50    | 0.160446119  | 0.002230152 | 0.00464722  |
| MAGEE1    | -0.160417381 | 0.002234285 | 0.004655345 |
| NIF3L1    | 0.160369491  | 0.002241188 | 0.004669239 |
| RNF39     | -0.160360344 | 0.002242508 | 0.004671501 |
| TCF3      | 0.16033095   | 0.002246757 | 0.004679862 |
| TRAT1     | -0.16032306  | 0.002247898 | 0.00468175  |
| ZC3H18    | -0.16031836  | 0.002248579 | 0.004682677 |
| ANKRD36   | -0.160308254 | 0.002250042 | 0.004685235 |
| CR1       | -0.160303683 | 0.002250704 | 0.004686124 |
| DIS3L2    | 0.160288387  | 0.002252922 | 0.00469025  |



|           |              |             |             |
|-----------|--------------|-------------|-------------|
| IL17B     | 0.160285269  | 0.002253374 | 0.004690701 |
| PI16      | -0.160253349 | 0.002258008 | 0.004699857 |
| IL20      | -0.160244841 | 0.002259245 | 0.00470194  |
| MEFV      | -0.160216243 | 0.002263406 | 0.004709686 |
| PKP1      | -0.160216015 | 0.00226344  | 0.004709686 |
| PLIN4     | -0.160210248 | 0.00226428  | 0.004710941 |
| GPR89A    | 0.160201293  | 0.002265585 | 0.004713164 |
| VWA5B2    | 0.16016984   | 0.002270174 | 0.004721435 |
| DNASE1    | 0.160169372  | 0.002270242 | 0.004721435 |
| C1QA      | 0.160169168  | 0.002270272 | 0.004721435 |
| SEC22C    | -0.160142884 | 0.002274113 | 0.004728931 |
| POLR1E    | 0.160075459  | 0.002283995 | 0.004748983 |
| UGT1A1    | -0.160060948 | 0.002286127 | 0.00475292  |
| SORCS2    | -0.16004718  | 0.002288151 | 0.004756632 |
| C6orf25   | -0.160027058 | 0.002291113 | 0.004762291 |
| C14orf180 | -0.160024218 | 0.002291531 | 0.004762663 |
| LRRC39    | -0.1600107   | 0.002293523 | 0.004766306 |
| EMR3      | -0.15999533  | 0.00229517  | 0.00476923  |
| LRRN4CL   | -0.159993086 | 0.002296121 | 0.004770709 |
| SLC27A1   | -0.159990142 | 0.002296555 | 0.004771113 |
| FUCA1     | -0.159981614 | 0.002297814 | 0.004773231 |
| CD151     | 0.15997869   | 0.002298246 | 0.00477363  |
| SCRN1     | -0.159964557 | 0.002300334 | 0.004777469 |
| BMP3      | -0.159947545 | 0.00230285  | 0.004782195 |
| PPP4R1L   | -0.159937593 | 0.002304322 | 0.004784754 |
| POLR3GL   | 0.159917269  | 0.002307333 | 0.004790071 |
| NUP210L   | -0.159917059 | 0.002307364 | 0.004790071 |
| NCOA3     | -0.159871995 | 0.002314052 | 0.004803455 |
| GBP7      | -0.159863775 | 0.002315274 | 0.004805491 |
| C7orf42   | -0.159841127 | 0.002318644 | 0.004811983 |
| CHST2     | -0.159799026 | 0.002324919 | 0.004824504 |
| MCART6    | -0.159796118 | 0.002325353 | 0.004824902 |
| MVK       | 0.159793068  | 0.002325809 | 0.004825344 |
| MKX       | -0.159722145 | 0.002336419 | 0.004846853 |
| SNX16     | -0.159709158 | 0.002338367 | 0.004850388 |
| SFI1      | 0.159676935  | 0.002343206 | 0.00485992  |
| C14orf162 | -0.159664243 | 0.002345115 | 0.004863109 |
| ERI2      | -0.159663461 | 0.002345232 | 0.004863109 |
| PPFIA3    | 0.159638659  | 0.002348966 | 0.004870344 |
| PKIB      | 0.159588198  | 0.002356579 | 0.004885621 |
| MSL3L2    | 0.159478016  | 0.002373281 | 0.004919735 |
| CELSR1    | -0.159459662 | 0.002376074 | 0.004925012 |
| PGBD2     | -0.159457414 | 0.002376416 | 0.004925209 |
| SNORA39   | -0.15944523  | 0.002378272 | 0.004928542 |
| FAM48B1   | -0.159442777 | 0.002378646 | 0.004928803 |
| C14orf70  | 0.15942346   | 0.002381591 | 0.004934393 |

|           |              |             |             |
|-----------|--------------|-------------|-------------|
| ALG10     | -0.159370658 | 0.002389659 | 0.004950594 |
| KIAA1045  | -0.159360932 | 0.002391148 | 0.004953027 |
| DIAPH1    | -0.159359735 | 0.002391331 | 0.004953027 |
| PPIAL4E   | 0.159331676  | 0.002395631 | 0.004961418 |
| CHTF8     | -0.159317067 | 0.002397873 | 0.004965544 |
| GRIP1     | -0.159209123 | 0.002414496 | 0.004999126 |
| RDH13     | 0.159208502  | 0.002414591 | 0.004999126 |
| SMC2      | -0.159138034 | 0.0024255   | 0.005021189 |
| F9        | -0.15912681  | 0.002427242 | 0.005024272 |
| 44083     | 0.159124761  | 0.00242756  | 0.005024408 |
| HSPB6     | -0.159099891 | 0.002431424 | 0.005031882 |
| MPPED2    | -0.159090477 | 0.002432887 | 0.005034388 |
| PRDM4     | -0.159082342 | 0.002434153 | 0.005036484 |
| TNFRSF11B | -0.159052011 | 0.002438878 | 0.005045735 |
| CYB5RL    | -0.159046699 | 0.002439706 | 0.005046924 |
| DKFZp761E | -0.159029859 | 0.002442333 | 0.005051835 |
| CYP3A4    | -0.159014853 | 0.002444677 | 0.005056157 |
| IFI44L    | -0.159005682 | 0.00244611  | 0.005058596 |
| NCRNA0018 | -0.158967223 | 0.002452129 | 0.005070517 |
| ZCWPW1    | 0.158964556  | 0.002452547 | 0.005070854 |
| SLC30A8   | 0.158945544  | 0.002455527 | 0.00507649  |
| LPPR4     | -0.158938843 | 0.002456579 | 0.005078137 |
| C16orf11  | 0.158897558  | 0.002463066 | 0.005091017 |
| NDRG4     | -0.158877    | 0.002466301 | 0.005097177 |
| MGC42105  | -0.158853605 | 0.002469989 | 0.005104267 |
| EPB42     | -0.158841966 | 0.002471825 | 0.005107532 |
| CDK16     | 0.158835865  | 0.002472788 | 0.005108992 |
| TCTEX1D1  | -0.158822891 | 0.002474837 | 0.005112695 |
| GALNTL6   | -0.158805604 | 0.00247757  | 0.005117809 |
| ST5       | -0.158803079 | 0.002477969 | 0.005118103 |
| NFIL3     | -0.158763194 | 0.002484285 | 0.005130617 |
| GPR128    | -0.158745859 | 0.002487035 | 0.005135763 |
| BET3L     | -0.158742752 | 0.002487528 | 0.005136249 |
| PWP2      | 0.158723358  | 0.002490608 | 0.005142076 |
| PABPC1L   | 0.158711062  | 0.002492563 | 0.005145578 |
| PALMD     | -0.158695906 | 0.002494974 | 0.005150021 |
| C20orf108 | -0.158685685 | 0.002496601 | 0.005152846 |
| GPR77     | -0.158661212 | 0.002500502 | 0.005160362 |
| OSTBETA   | 0.158653164  | 0.002501785 | 0.005162476 |
| CLEC17A   | -0.158624644 | 0.00250634  | 0.005171339 |
| FCGR2B    | -0.158600092 | 0.002510267 | 0.005178904 |
| PRKG2     | -0.158588646 | 0.002512099 | 0.005182148 |
| RHOA      | 0.15858608   | 0.00251251  | 0.005182459 |
| ARGFXP2   | -0.158577263 | 0.002513923 | 0.005184836 |
| WDR52     | -0.158555745 | 0.002517374 | 0.005191415 |
| AKAP5     | -0.158546216 | 0.002518903 | 0.005194032 |

|           |              |             |             |
|-----------|--------------|-------------|-------------|
| OR8B12    | 0.158525293  | 0.002522265 | 0.005200424 |
| ZNF410    | -0.15852273  | 0.002522677 | 0.005200735 |
| OLAH      | -0.158517906 | 0.002523452 | 0.005201796 |
| SCARNA5   | 0.158515345  | 0.002523864 | 0.005202107 |
| CSK       | 0.158503148  | 0.002525827 | 0.005205613 |
| REG3A     | 0.158479807  | 0.002529586 | 0.005212822 |
| LOC389791 | 0.158476444  | 0.002530128 | 0.005213062 |
| CETN1     | 0.158475836  | 0.002530226 | 0.005213062 |
| TNRC6C    | -0.158469532 | 0.002531243 | 0.005214617 |
| GPR112    | -0.158462079 | 0.002532445 | 0.005216554 |
| SCPEP1    | -0.158390126 | 0.002544078 | 0.005239975 |
| ARHGAP26  | -0.158348894 | 0.002550766 | 0.005253207 |
| DSCR8     | 0.158329588  | 0.002553903 | 0.005259124 |
| TMEM45A   | -0.158322952 | 0.002554983 | 0.005260802 |
| LOC646999 | -0.158301379 | 0.002558494 | 0.005267487 |
| ZNF702P   | -0.158294686 | 0.002559584 | 0.005269187 |
| BTN1A1    | 0.15829082   | 0.002560214 | 0.005269939 |
| CARTPT    | 0.158287375  | 0.002560775 | 0.005270549 |
| LOC100132 | -0.158283731 | 0.002561369 | 0.005271227 |
| CENPJ     | 0.158242247  | 0.00256814  | 0.005284615 |
| FCER1G    | 0.158232026  | 0.00256981  | 0.005287507 |
| GLCE      | -0.158212357 | 0.002573028 | 0.005293581 |
| CELSR3    | 0.158197103  | 0.002575527 | 0.005298173 |
| CSNK1D    | 0.158151094  | 0.002583074 | 0.005313151 |
| LOC441089 | -0.158114288 | 0.002589127 | 0.005325051 |
| PTPLAD1   | -0.158107524 | 0.002590241 | 0.005326792 |
| MXRA8     | -0.158077668 | 0.002595162 | 0.005336361 |
| EPT1      | -0.158036069 | 0.002602033 | 0.005349938 |
| NME7      | 0.158024677  | 0.002603918 | 0.00535326  |
| SSBP2     | -0.15798372  | 0.002610704 | 0.005366438 |
| TSN       | 0.157982735  | 0.002610867 | 0.005366438 |
| BASP1     | -0.157962475 | 0.00261423  | 0.005372796 |
| RWDD3     | 0.157935704  | 0.002618679 | 0.005381385 |
| KRTAP20-4 | 0.157894418  | 0.002625555 | 0.005394957 |
| C20orf70  | 0.157885885  | 0.002626978 | 0.005397324 |
| FAM169B   | -0.157852602 | 0.002632535 | 0.005408185 |
| NKG7      | 0.157830747  | 0.002636191 | 0.005415135 |
| POLE3     | 0.157799931  | 0.002641352 | 0.005425178 |
| TMEM165   | -0.1577918   | 0.002642716 | 0.005427419 |
| AES       | 0.157778246  | 0.00264499  | 0.005431529 |
| HIRIP3    | 0.157775826  | 0.002645396 | 0.005431804 |
| C6orf154  | 0.157768481  | 0.002646629 | 0.005433776 |
| RUNX1     | -0.157751133 | 0.002649544 | 0.0054392   |
| PXDNL     | -0.15767849  | 0.002661783 | 0.005463761 |
| SUV39H2   | 0.157641104  | 0.002668101 | 0.005476166 |
| ABI2      | -0.157616054 | 0.002672343 | 0.005484306 |

|           |              |             |             |
|-----------|--------------|-------------|-------------|
| JPH4      | -0.157575085 | 0.002679293 | 0.005498002 |
| LGALS7    | 0.157490259  | 0.002693734 | 0.005526962 |
| DACT3     | -0.157488936 | 0.00269396  | 0.005526962 |
| OR2W3     | -0.157482681 | 0.002695028 | 0.005528583 |
| CRYGA     | 0.157474177  | 0.00269648  | 0.005530992 |
| HLA-DMA   | 0.15747101   | 0.002697021 | 0.005531533 |
| PLA2G2E   | 0.15743474   | 0.002703225 | 0.005543685 |
| ALK       | -0.157423439 | 0.00270516  | 0.005547083 |
| LMOD2     | -0.157417591 | 0.002706163 | 0.005548567 |
| LGALS13   | 0.157407456  | 0.0027079   | 0.005551558 |
| PTPRD     | -0.157379911 | 0.002712627 | 0.005560677 |
| SULT6B1   | 0.157368588  | 0.002714573 | 0.005564092 |
| SLC26A10  | -0.157344467 | 0.002718722 | 0.005572022 |
| PPP2R5C   | -0.157335805 | 0.002720213 | 0.005574505 |
| ATP6V1H   | 0.157331898  | 0.002720886 | 0.00557531  |
| MED25     | 0.157324904  | 0.00272209  | 0.005577205 |
| LOC348840 | -0.157312285 | 0.002724265 | 0.005581087 |
| SERBP1    | 0.157236537  | 0.002737355 | 0.005607326 |
| FAM178A   | -0.157221789 | 0.00273991  | 0.005611983 |
| LOC642826 | -0.157217304 | 0.002740688 | 0.005612998 |
| EYA2      | -0.157211725 | 0.002741655 | 0.005614402 |
| FER1L6    | -0.157201661 | 0.002743401 | 0.0056174   |
| DHRS3     | 0.15712337   | 0.002757018 | 0.00564429  |
| GPBP1     | 0.157122895  | 0.0027571   | 0.00564429  |
| ARHGAP25  | -0.157108692 | 0.002759577 | 0.00564878  |
| WEE1      | -0.157101844 | 0.002760772 | 0.005650645 |
| S100A16   | 0.157083382  | 0.002763996 | 0.005656662 |
| TMEM217   | -0.157078986 | 0.002764764 | 0.005657653 |
| ZBBX      | 0.157056367  | 0.00276872  | 0.005665165 |
| CECR4     | 0.157027996  | 0.002773688 | 0.005674749 |
| TMEM49    | 0.156981857  | 0.002781786 | 0.005690731 |
| NPY       | 0.156960941  | 0.002785464 | 0.005697097 |
| USP14     | -0.156960905 | 0.00278547  | 0.005697097 |
| CD3D      | 0.156954048  | 0.002786677 | 0.00569898  |
| SLC36A1   | -0.156943298 | 0.00278857  | 0.005702266 |
| PPBP      | -0.156918582 | 0.002792926 | 0.005710587 |
| GPR183    | -0.156913563 | 0.002793811 | 0.005711251 |
| PZP       | -0.156913491 | 0.002793824 | 0.005711251 |
| ANKRD34A  | -0.156911322 | 0.002794207 | 0.005711447 |
| LNP1      | -0.156874896 | 0.002800641 | 0.005724011 |
| FAM36A    | 0.156798684  | 0.002814146 | 0.005751023 |
| GGA2      | -0.156790112 | 0.002815669 | 0.005753545 |
| INPP5D    | -0.15677495  | 0.002818364 | 0.005758461 |
| C10orf129 | 0.156757141  | 0.002821533 | 0.005764344 |
| ACR       | -0.156733193 | 0.002825799 | 0.005772468 |
| COL19A1   | -0.156724682 | 0.002827316 | 0.005774975 |

|           |              |             |             |
|-----------|--------------|-------------|-------------|
| ZNF814    | 0.156722717  | 0.002827667 | 0.005775099 |
| SLC34A2   | -0.156716139 | 0.002828841 | 0.005776903 |
| LOC100130 | 0.156667324  | 0.002837563 | 0.005794122 |
| CYS1      | -0.156654386 | 0.002839879 | 0.005798257 |
| SPSB4     | -0.156615736 | 0.002846808 | 0.005811807 |
| SLC25A16  | -0.156588364 | 0.002851724 | 0.005821247 |
| SUCLG1    | 0.156567229  | 0.002855526 | 0.00582841  |
| CDX2      | 0.156552819  | 0.00285812  | 0.005833107 |
| DHFR      | -0.156526544 | 0.002862856 | 0.005842174 |
| POLR3B    | -0.156491473 | 0.002869189 | 0.005854498 |
| AP4B1     | 0.156478291  | 0.002871572 | 0.005858761 |
| FAM127A   | 0.156476525  | 0.002871892 | 0.005858812 |
| MZF1      | -0.15643097  | 0.002880144 | 0.005875045 |
| TIMM17A   | 0.156395096  | 0.002886657 | 0.005887728 |
| KCNF1     | 0.156357234  | 0.002893546 | 0.005901175 |
| PDHB      | 0.156305077  | 0.002903061 | 0.005919972 |
| GCM1      | 0.156225946  | 0.00291755  | 0.00594891  |
| GAL       | 0.156212722  | 0.002919977 | 0.005953251 |
| LYN       | -0.156204689 | 0.002921453 | 0.00595565  |
| DLL4      | -0.156185394 | 0.002925001 | 0.005962271 |
| WIPF3     | -0.156182375 | 0.002925556 | 0.005962793 |
| ADPRHL1   | 0.156168591  | 0.002928093 | 0.005967353 |
| TLN2      | -0.156158439 | 0.002929962 | 0.005970552 |
| LOC401010 | 0.156131541  | 0.002934922 | 0.005979507 |
| SLC45A1   | -0.156131345 | 0.002934958 | 0.005979507 |
| HMGN4     | 0.156125542  | 0.002936029 | 0.005981077 |
| SOX2OT    | -0.156109599 | 0.002938973 | 0.005986462 |
| JAG2      | -0.156083833 | 0.002943736 | 0.005995552 |
| SERPINI1  | 0.156080704  | 0.002944315 | 0.005996118 |
| KCTD17    | 0.156050139  | 0.002949976 | 0.006007032 |
| C9orf43   | 0.156045987  | 0.002950746 | 0.006007985 |
| SLC38A5   | 0.156023735  | 0.002954874 | 0.006015776 |
| ITIH5     | -0.156017779 | 0.00295598  | 0.006017413 |
| C15orf58  | -0.155949123 | 0.002968756 | 0.006042506 |
| TMEM63A   | -0.155947261 | 0.002969103 | 0.006042506 |
| CDH10     | 0.155946646  | 0.002969218 | 0.006042506 |
| LHX9      | -0.155938273 | 0.002970779 | 0.006045067 |
| FBN2      | -0.155934453 | 0.002971492 | 0.006045899 |
| SST       | 0.155924265  | 0.002973394 | 0.006049151 |
| GPR119    | 0.155901153  | 0.002977712 | 0.006057317 |
| ZDHHC4    | 0.155892985  | 0.002979239 | 0.006059804 |
| NPTX1     | -0.155879275 | 0.002981804 | 0.006064403 |
| C16orf92  | 0.155798388  | 0.00299698  | 0.006094646 |
| GCA       | -0.155753741 | 0.003005387 | 0.006111117 |
| TAF1A     | -0.1557216   | 0.003011452 | 0.006122825 |
| C7orf61   | 0.155669046  | 0.003021393 | 0.00614241  |

|           |              |             |             |
|-----------|--------------|-------------|-------------|
| BFSP2     | 0.15566312   | 0.003022516 | 0.006144065 |
| ZNF583    | -0.155655212 | 0.003024015 | 0.006146485 |
| ANKAR     | -0.15561351  | 0.003031931 | 0.006161946 |
| PKP4      | -0.155570251 | 0.003040162 | 0.006178044 |
| SLC15A4   | -0.155542906 | 0.003045376 | 0.006188007 |
| SNORD15B  | 0.155473788  | 0.00305859  | 0.006214224 |
| CAMKK1    | -0.155468576 | 0.003059589 | 0.006215619 |
| GRB10     | -0.155415018 | 0.003069867 | 0.006235475 |
| THG1L     | 0.155414383  | 0.003069989 | 0.006235475 |
| FER1L4    | 0.155396831  | 0.003073364 | 0.006241694 |
| ZFP28     | -0.155390505 | 0.003074582 | 0.00624353  |
| PCSK1N    | 0.155361082  | 0.00308025  | 0.006254402 |
| ITFG2     | -0.155343457 | 0.003083649 | 0.006260666 |
| NPRL3     | 0.155315641  | 0.003089021 | 0.006270934 |
| WBSCR26   | 0.155283404  | 0.003095258 | 0.006282955 |
| CD34      | -0.155278552 | 0.003096198 | 0.006284222 |
| CUL7      | 0.155239267  | 0.003103816 | 0.006299042 |
| KCNAB3    | -0.155223597 | 0.003106859 | 0.006304575 |
| RBM24     | 0.155208604  | 0.003109774 | 0.006309847 |
| CIITA     | -0.155181038 | 0.003115139 | 0.006320089 |
| GOLGA2B   | 0.15517128   | 0.00311704  | 0.006323301 |
| ZNF471    | -0.155160872 | 0.003119069 | 0.006326773 |
| TFCP2L1   | -0.155115608 | 0.003127907 | 0.006344053 |
| YY1AP1    | 0.155112881  | 0.00312844  | 0.006344488 |
| BRD2      | -0.155096085 | 0.003131725 | 0.006350024 |
| SNAP29    | 0.155095668  | 0.003131807 | 0.006350024 |
| FOXO3B    | -0.155076528 | 0.003135555 | 0.006356976 |
| LOC723809 | 0.155066481  | 0.003137524 | 0.006360321 |
| MST1R     | -0.155053325 | 0.003140104 | 0.006364903 |
| NUDCD2    | 0.155044866  | 0.003141764 | 0.00636762  |
| CCDC45    | 0.155041825  | 0.003142361 | 0.006368182 |
| NFKBID    | -0.155006026 | 0.003149396 | 0.00638179  |
| VIPAR     | -0.155000072 | 0.003150568 | 0.006383514 |
| ARL4A     | 0.154972841  | 0.003155931 | 0.006393729 |
| KHDRBS3   | 0.15488341   | 0.003173601 | 0.006428875 |
| C9orf91   | -0.154875944 | 0.00317508  | 0.006431217 |
| OR10J5    | -0.154852944 | 0.003179641 | 0.0064398   |
| CDC27     | -0.154824117 | 0.003185366 | 0.006450739 |
| HMX2      | 0.154819466  | 0.003186291 | 0.006451955 |
| LYG2      | 0.154812242  | 0.003187727 | 0.006454208 |
| UGGT2     | -0.154798924 | 0.003190377 | 0.006458916 |
| TPM4      | -0.154749297 | 0.003200269 | 0.006478283 |
| TSEN2     | 0.154718907  | 0.00320634  | 0.006489913 |
| HOXB13    | 0.154671068  | 0.003215918 | 0.006508638 |
| HIST1H4H  | 0.154665127  | 0.003217109 | 0.006510388 |
| CCDC135   | 0.154617778  | 0.003226618 | 0.006528967 |

|           |              |             |             |
|-----------|--------------|-------------|-------------|
| SH3GL2    | -0.154612776 | 0.003227624 | 0.006530339 |
| FOXG1     | 0.154548933  | 0.003240489 | 0.006555216 |
| PLEKHF1   | 0.154548493  | 0.003240577 | 0.006555216 |
| GATSL2    | -0.154519666 | 0.003246402 | 0.006566331 |
| DAGLB     | 0.154513853  | 0.003247577 | 0.006568042 |
| CSRP1     | -0.154492979 | 0.003251802 | 0.006575918 |
| GGTLC1    | 0.154486421  | 0.003253131 | 0.006577937 |
| REEP1     | -0.154466071 | 0.003257256 | 0.006585609 |
| PPP1R3A   | 0.154457528  | 0.003258989 | 0.006588062 |
| SCNN1A    | -0.154456829 | 0.003259131 | 0.006588062 |
| C21orf96  | -0.154450965 | 0.003260321 | 0.006589799 |
| FAM43A    | -0.154396741 | 0.003271345 | 0.00661141  |
| SETD3     | -0.154374765 | 0.003275822 | 0.006619787 |
| KIF23     | 0.154349111  | 0.003281056 | 0.006629691 |
| VEGFB     | 0.154307101  | 0.003289643 | 0.006646368 |
| CREB3L1   | -0.154302591 | 0.003290566 | 0.006647559 |
| TMEM5     | 0.154281516  | 0.003294883 | 0.006655604 |
| LOC150197 | 0.154233179  | 0.003304803 | 0.006674965 |
| SNCAIP    | -0.154214855 | 0.003308571 | 0.006681897 |
| SCRG1     | -0.15420636  | 0.003310319 | 0.006684749 |
| LOC100133 | 0.154181703  | 0.003315397 | 0.006694326 |
| TLR8      | -0.154143999 | 0.003323176 | 0.006709353 |
| VWA2      | -0.154139608 | 0.003324083 | 0.006710154 |
| METTL7A   | -0.154138816 | 0.003324247 | 0.006710154 |
| TTC35     | 0.154103244  | 0.003331604 | 0.006724322 |
| LASS3     | 0.154061602  | 0.003340234 | 0.006741059 |
| C20orf186 | 0.154051326  | 0.003342367 | 0.00674468  |
| KLRF1     | -0.154040657 | 0.003344583 | 0.006748467 |
| KIN       | 0.154036653  | 0.003345415 | 0.006749462 |
| TAS2R4    | -0.154028138 | 0.003347185 | 0.006752349 |
| MXI1      | -0.154026254 | 0.003347577 | 0.006752455 |
| DBP       | 0.153989407  | 0.003355246 | 0.006767239 |
| TMEM132B  | -0.153966987 | 0.00335992  | 0.00677598  |
| PDSS1     | 0.153922976  | 0.003369112 | 0.006793831 |
| TP63      | -0.153862825 | 0.003381713 | 0.006818074 |
| TMEM194A  | -0.153862316 | 0.00338182  | 0.006818074 |
| NPAS2     | -0.153846103 | 0.003385223 | 0.006824246 |
| COL11A1   | -0.153831928 | 0.003388202 | 0.006828957 |
| GOLGA8C   | 0.153831717  | 0.003388246 | 0.006828957 |
| SLC39A2   | -0.15381278  | 0.003392229 | 0.006836293 |
| SH3BGRL2  | -0.153805671 | 0.003393725 | 0.006838616 |
| LRCH4     | -0.153798185 | 0.003395302 | 0.0068411   |
| PTPRZ1    | -0.153764107 | 0.003402485 | 0.006854881 |
| PTH1R     | -0.153732738 | 0.00340911  | 0.006867533 |
| PINK1     | -0.153726979 | 0.003410328 | 0.006869291 |
| KREMEN1   | -0.153724118 | 0.003410933 | 0.006869815 |

|           |              |             |             |
|-----------|--------------|-------------|-------------|
| VTCN1     | -0.153721824 | 0.003411418 | 0.006870097 |
| VPS26B    | -0.153711463 | 0.00341361  | 0.006873403 |
| SLC17A3   | 0.153710802  | 0.00341375  | 0.006873403 |
| CLDN10    | -0.153675241 | 0.003421284 | 0.006887875 |
| MASTL     | -0.153642256 | 0.003428285 | 0.006901273 |
| PCDHB19P  | -0.153635853 | 0.003429646 | 0.006903314 |
| ATXN2     | -0.153588446 | 0.003439735 | 0.006922922 |
| FPR1      | -0.153564508 | 0.003444839 | 0.006932495 |
| TAS2R50   | -0.153496317 | 0.003459418 | 0.006961131 |
| RNF213    | -0.15345965  | 0.003467281 | 0.006976247 |
| CPEB1     | -0.153455877 | 0.00346809  | 0.006977172 |
| MREG      | -0.153434217 | 0.003472743 | 0.006985827 |
| SNORA8    | -0.153426307 | 0.003474444 | 0.006988542 |
| ZNF404    | 0.153406059  | 0.003478801 | 0.006996598 |
| RPA4      | -0.153375681 | 0.003485346 | 0.007009055 |
| C13orf16  | 0.153370354  | 0.003486496 | 0.007010658 |
| C5orf62   | -0.153334859 | 0.00349416  | 0.007025361 |
| C6orf122  | -0.153329241 | 0.003495375 | 0.007027094 |
| ELANE     | -0.153306861 | 0.003500217 | 0.007036118 |
| SDHAP1    | -0.153269796 | 0.00350825  | 0.007051072 |
| SCUBE1    | -0.153269267 | 0.003508364 | 0.007051072 |
| MAP6D1    | 0.153250931  | 0.003512344 | 0.007058359 |
| GPR81     | -0.153236965 | 0.003515379 | 0.007063744 |
| HIST2H2AB | 0.153231621  | 0.00351654  | 0.007065365 |
| HSP90B3P  | -0.153221895 | 0.003518655 | 0.007068901 |
| EPHA7     | -0.153212098 | 0.003520787 | 0.00707247  |
| DACH2     | 0.153203731  | 0.003522608 | 0.007075416 |
| SDC3      | -0.153157643 | 0.003532657 | 0.007094883 |
| C22orf41  | 0.153113644  | 0.003542274 | 0.007112971 |
| MTHFD1L   | 0.153113173  | 0.003542377 | 0.007112971 |
| FAM40A    | -0.153080259 | 0.003549587 | 0.007126729 |
| CCND3     | 0.153067781  | 0.003552324 | 0.007131505 |
| POTEF     | -0.153054217 | 0.003555301 | 0.007136763 |
| TMEM87A   | -0.153029195 | 0.003560799 | 0.007147079 |
| SOX15     | -0.152976446 | 0.003572415 | 0.007169671 |
| 44088     | 0.152969255  | 0.003574001 | 0.007172132 |
| C21orf122 | 0.15295748   | 0.0035766   | 0.007176624 |
| GALNT9    | -0.15295047  | 0.003578148 | 0.007179007 |
| CHURC1    | -0.152942223 | 0.00357997  | 0.007181938 |
| S1PR2     | 0.152917114  | 0.003585522 | 0.00719163  |
| TSPAN33   | 0.152917108  | 0.003585523 | 0.00719163  |
| TTC31     | -0.152911601 | 0.003586742 | 0.00719335  |
| SCARNA9   | 0.152870879  | 0.003595765 | 0.007210721 |
| NOXO1     | 0.152851764  | 0.003600008 | 0.007218502 |
| ROPN1B    | -0.152831956 | 0.003604409 | 0.0072266   |
| DHRS4     | 0.15280337   | 0.00361077  | 0.007238623 |



|           |              |             |             |
|-----------|--------------|-------------|-------------|
| ABHD3     | -0.152771902 | 0.003617783 | 0.007251953 |
| ABHD6     | -0.152761786 | 0.00362004  | 0.0072553   |
| PCDHA10   | -0.152760123 | 0.003620412 | 0.0072553   |
| TPH1      | -0.152759521 | 0.003620546 | 0.0072553   |
| VPREB3    | 0.152755871  | 0.003621361 | 0.00725557  |
| FAP       | -0.152755654 | 0.003621409 | 0.00725557  |
| CDCA7     | 0.152749371  | 0.003622812 | 0.007257651 |
| TRPV1     | -0.152644108 | 0.003646392 | 0.007304154 |
| RADIL     | -0.152565417 | 0.00366411  | 0.007338907 |
| KRT81     | -0.152550828 | 0.003667404 | 0.007344765 |
| PRMT3     | -0.152548076 | 0.003668025 | 0.007345271 |
| EFNB1     | -0.152482465 | 0.003682872 | 0.007374261 |
| ACTBL2    | -0.152478442 | 0.003683784 | 0.007375346 |
| ARPC5     | 0.152466541  | 0.003686484 | 0.007380008 |
| LAT       | 0.152453935  | 0.003689345 | 0.007384994 |
| KRTAP10-6 | -0.152442866 | 0.003691859 | 0.007389284 |
| SPP1      | 0.152430579  | 0.003694652 | 0.00739413  |
| SSX2      | 0.152413333  | 0.003698575 | 0.007401238 |
| MEMO1     | 0.152379141  | 0.003706363 | 0.007416078 |
| RCVRN     | -0.152369383 | 0.003708589 | 0.007419786 |
| MTVR2     | -0.152332754 | 0.003716954 | 0.007435775 |
| C20orf200 | -0.152278844 | 0.003729296 | 0.007459716 |
| MIAT      | -0.152264376 | 0.003732615 | 0.007465604 |
| C9orf106  | -0.152259038 | 0.00373384  | 0.007466683 |
| SLC7A9    | 0.152258608  | 0.003733939 | 0.007466683 |
| ULK1      | -0.152257125 | 0.003734279 | 0.007466683 |
| GAS7      | -0.152192739 | 0.003749086 | 0.007495538 |
| ARID5A    | 0.152188752  | 0.003750005 | 0.007496622 |
| CRLS1     | 0.152146837  | 0.003759675 | 0.007515199 |
| ZNF251    | 0.152144193  | 0.003760286 | 0.007515665 |
| CLIP2     | -0.152141756 | 0.003760849 | 0.007516036 |
| WNT5A     | -0.152138134 | 0.003761686 | 0.007516955 |
| TOPBP1    | -0.152126416 | 0.003764394 | 0.007521613 |
| PROC      | 0.152114411  | 0.003767171 | 0.007526406 |
| CARD8     | -0.152102674 | 0.003769888 | 0.007531078 |
| HIATL2    | 0.152094528  | 0.003771775 | 0.007534092 |
| SETDB2    | -0.152089467 | 0.003772947 | 0.00753497  |
| C17orf73  | 0.152089364  | 0.003772971 | 0.00753497  |
| BPIL1     | 0.152058832  | 0.003780052 | 0.007548354 |
| GAGE2B    | 0.15205429   | 0.003781106 | 0.007549702 |
| RBM14     | 0.152039786  | 0.003784475 | 0.007555671 |
| INTS10    | -0.152027761 | 0.00378727  | 0.007560493 |
| ZNF142    | -0.151978281 | 0.00379879  | 0.007582731 |
| ADPRH     | -0.151967218 | 0.00380137  | 0.007587121 |
| FLII      | -0.151942657 | 0.003807104 | 0.007597804 |
| PGBD5     | -0.15194004  | 0.003807716 | 0.007598263 |

|           |              |             |             |
|-----------|--------------|-------------|-------------|
| GZMH      | 0.151937736  | 0.003808254 | 0.007598575 |
| CMTM5     | -0.151928238 | 0.003810474 | 0.007602243 |
| REM2      | 0.151855143  | 0.003827598 | 0.007635643 |
| PLP1      | -0.151850856 | 0.003828605 | 0.007636885 |
| MECP2     | -0.151838795 | 0.003831438 | 0.007641771 |
| KLHL34    | -0.151833875 | 0.003832594 | 0.007643312 |
| CCDC19    | 0.15181626   | 0.003836736 | 0.007650594 |
| PTCRA     | 0.151815078  | 0.003837014 | 0.007650594 |
| DGKA      | -0.151727934 | 0.003857566 | 0.007690803 |
| UGT3A1    | -0.151713091 | 0.003861077 | 0.007697032 |
| CHI3L1    | -0.151696182 | 0.003865079 | 0.007704239 |
| S100A5    | 0.151682139  | 0.003868407 | 0.0077101   |
| CD4       | -0.151663462 | 0.003872835 | 0.007718154 |
| SNRPN     | 0.151657417  | 0.00387427  | 0.007720241 |
| C20orf72  | 0.151634544  | 0.003879702 | 0.007730292 |
| SERINC4   | -0.151601937 | 0.003887458 | 0.00774497  |
| SMAD2     | -0.151588645 | 0.003890623 | 0.007750501 |
| MEOX1     | -0.151584971 | 0.003891499 | 0.00775147  |
| AGPHD1    | 0.151573275  | 0.003894287 | 0.007756248 |
| ARID3A    | 0.151502467  | 0.003911204 | 0.007789162 |
| PARK2     | -0.151488586 | 0.003914528 | 0.007795003 |
| NUP214    | -0.15143875  | 0.003926483 | 0.007818028 |
| ATF3      | -0.151410655 | 0.003933238 | 0.007830694 |
| DNAH11    | -0.151358    | 0.003945925 | 0.007855168 |
| UGT2B15   | -0.151351963 | 0.003947382 | 0.007857283 |
| ZYG11A    | 0.151340024  | 0.003950265 | 0.007862236 |
| GPR126    | -0.15133699  | 0.003950998 | 0.007862908 |
| CLK2P     | -0.151315645 | 0.003956158 | 0.00787239  |
| NUMBL     | -0.151312076 | 0.003957021 | 0.007873321 |
| BAI2      | -0.151289547 | 0.003962475 | 0.007883385 |
| LRP5L     | -0.151275628 | 0.003965847 | 0.007889307 |
| SNX21     | 0.151272094  | 0.003966704 | 0.007890223 |
| HCG27     | 0.15126976   | 0.00396727  | 0.007890561 |
| TCEA1     | 0.151246608  | 0.003972888 | 0.007900793 |
| MATN4     | 0.151245288  | 0.003973208 | 0.007900793 |
| BCL7B     | 0.15118297   | 0.003988366 | 0.007929735 |
| UROCI     | -0.151182177 | 0.003988559 | 0.007929735 |
| SHMT1     | -0.151154872 | 0.003995217 | 0.007942179 |
| ANKRD13D  | 0.15113587   | 0.003999857 | 0.007950608 |
| NCRNA0016 | 0.151129844  | 0.004001329 | 0.007952741 |
| TAF9B     | -0.151068609 | 0.004016318 | 0.007981736 |
| PAK4      | 0.151062301  | 0.004017865 | 0.007984013 |
| FAM7A2    | -0.151042728 | 0.004022669 | 0.007992761 |
| GPR107    | -0.151039021 | 0.004023579 | 0.007993772 |
| KLF4      | -0.150985462 | 0.004036752 | 0.008019144 |
| DPT       | -0.150980107 | 0.004038071 | 0.008020964 |

|           |              |             |             |
|-----------|--------------|-------------|-------------|
| FLJ25328  | 0.150947648  | 0.004046076 | 0.008036063 |
| C11orf87  | -0.150942827 | 0.004047266 | 0.008037625 |
| SLC7A4    | -0.15093319  | 0.004049646 | 0.00804155  |
| TMEM25    | -0.150878997 | 0.004063054 | 0.008067369 |
| ANKS1A    | -0.150855678 | 0.004068835 | 0.008077863 |
| LOC284788 | 0.150854409  | 0.00406915  | 0.008077863 |
| WDR86     | -0.150844618 | 0.00407158  | 0.008081881 |
| FLRT3     | -0.15083777  | 0.00407328  | 0.00808445  |
| CPLX3     | 0.150829239  | 0.004075399 | 0.00808785  |
| PGM3      | -0.150817933 | 0.004078209 | 0.00809262  |
| MGAT4A    | -0.15081339  | 0.004079339 | 0.008094055 |
| HS1BP3    | 0.150803382  | 0.004081828 | 0.008098187 |
| TLE2      | -0.150795706 | 0.004083738 | 0.00810117  |
| MAGEA4    | 0.150783944  | 0.004086667 | 0.008106172 |
| CTBP1     | 0.150763184  | 0.004091841 | 0.008115626 |
| HIST1H4D  | 0.150749415  | 0.004095275 | 0.00812163  |
| CD3G      | -0.150724937 | 0.004101388 | 0.008132149 |
| BBC3      | 0.150724904  | 0.004101396 | 0.008132149 |
| LOC647309 | -0.15070996  | 0.004105132 | 0.008138746 |
| NOL9      | -0.150644928 | 0.004121425 | 0.008170234 |
| CECR7     | 0.150636571  | 0.004123523 | 0.008173579 |
| SCARNA18  | 0.150623752  | 0.004126743 | 0.008179148 |
| FSCN1     | -0.1506149   | 0.004128968 | 0.008182744 |
| BEX5      | 0.150584098  | 0.004136718 | 0.008197287 |
| EFHD2     | 0.150551199  | 0.00414501  | 0.008212902 |
| LIX1      | 0.150485576  | 0.004161596 | 0.008244944 |
| SMEK3P    | 0.150480808  | 0.004162803 | 0.008246515 |
| UNC93B1   | 0.150473728  | 0.004164596 | 0.008249248 |
| UBE2J1    | -0.150429396 | 0.004175842 | 0.008269905 |
| KCNQ3     | -0.150429343 | 0.004175856 | 0.008269905 |
| SUSD2     | -0.150424098 | 0.004177188 | 0.008271721 |
| ZNF780A   | 0.150353328  | 0.004195202 | 0.008306567 |
| DLX6      | 0.150344605  | 0.004197427 | 0.008310147 |
| PRRX1     | -0.150339782 | 0.004198658 | 0.008311757 |
| KIAA1429  | 0.150316909  | 0.0042045   | 0.008322494 |
| C3orf67   | -0.150299975 | 0.004208829 | 0.008330236 |
| C6orf123  | -0.15027191  | 0.004216014 | 0.008343626 |
| KCNJ5     | -0.150251783 | 0.004221173 | 0.008353006 |
| MAS1L     | -0.150235682 | 0.004225304 | 0.00836035  |
| ALG6      | 0.150195398  | 0.004235656 | 0.008380001 |
| SYT2      | -0.15018909  | 0.004237279 | 0.008382379 |
| SIRT2     | 0.150147015  | 0.00424812  | 0.00840299  |
| GCNT7     | -0.150140249 | 0.004249865 | 0.008405122 |
| MAPK7     | -0.150139564 | 0.004250042 | 0.008405122 |
| INPP5E    | -0.150118009 | 0.004255607 | 0.008415293 |
| BRF2      | 0.150105409  | 0.004258864 | 0.008420897 |

|           |              |             |             |
|-----------|--------------|-------------|-------------|
| KCNK10    | 0.15009761   | 0.004260881 | 0.008424048 |
| C8A       | -0.150073502 | 0.00426712  | 0.008435547 |
| PRRT2     | -0.149965397 | 0.004295201 | 0.008490216 |
| LOC100130 | 0.149942637  | 0.004301134 | 0.008501101 |
| PPP2R2D   | 0.14992819   | 0.004304904 | 0.008507708 |
| PDIA6     | 0.149906065  | 0.004310684 | 0.008518284 |
| PCDHB3    | -0.149852141 | 0.004324799 | 0.008545329 |
| DKK3      | -0.14981786  | 0.004333794 | 0.008562253 |
| RAD1      | 0.14981614   | 0.004334246 | 0.008562296 |
| C14orf101 | -0.149801733 | 0.004338031 | 0.008568703 |
| DPPA4     | -0.149800522 | 0.00433835  | 0.008568703 |
| DDN       | 0.149751404  | 0.00435128  | 0.008593389 |
| C19orf30  | 0.149744461  | 0.00435311  | 0.008596151 |
| LOC285780 | -0.149723751 | 0.004358574 | 0.008606089 |
| ADM2      | 0.149716477  | 0.004360495 | 0.008609027 |
| RRP15     | 0.149695268  | 0.004366099 | 0.008619238 |
| ERLIN1    | -0.149689082 | 0.004367735 | 0.008621613 |
| DIO3      | -0.149637267 | 0.00438146  | 0.008647846 |
| TAS2R10   | -0.149632885 | 0.004382622 | 0.008649283 |
| TSHB      | -0.149604113 | 0.004390261 | 0.008663501 |
| ACAT2     | 0.149598386  | 0.004391784 | 0.008665647 |
| TDRD12    | -0.149577096 | 0.004397446 | 0.00867596  |
| SYT5      | 0.149491658  | 0.004420236 | 0.008720059 |
| HSP90AB4P | 0.149480864  | 0.004423122 | 0.008724889 |
| ITPRIPL2  | -0.149472883 | 0.004425258 | 0.008728237 |
| BRI3BP    | 0.14941995   | 0.004439445 | 0.008755353 |
| CHRDL1    | -0.149385601 | 0.004448673 | 0.008772684 |
| KLK3      | 0.149381148  | 0.004449871 | 0.008774176 |
| EPHB6     | -0.149372882 | 0.004452095 | 0.008777693 |
| L3MBTL2   | 0.149322858  | 0.004465575 | 0.008803398 |
| CDK3      | 0.149290102  | 0.004474421 | 0.008819965 |
| ECH1      | 0.149269881  | 0.004479891 | 0.008829872 |
| PHF14     | 0.149193301  | 0.004500658 | 0.008869926 |
| OCIAD1    | -0.149161612 | 0.004509277 | 0.008886033 |
| SPINK4    | 0.149152555  | 0.004511743 | 0.008890013 |
| TMEM17    | -0.149140388 | 0.004515057 | 0.008895664 |
| FUNDC2P2  | 0.149131228  | 0.004517555 | 0.008899703 |
| FDX1      | -0.149081542 | 0.004531121 | 0.008925546 |
| RNF133    | -0.149078851 | 0.004531856 | 0.008925902 |
| NOD2      | -0.149077603 | 0.004532198 | 0.008925902 |
| C14orf1   | 0.149065559  | 0.004535492 | 0.008931507 |
| TTC9      | -0.149057047 | 0.004537822 | 0.008935212 |
| BREA2     | 0.149054097  | 0.00453863  | 0.008935918 |
| NDST4     | 0.149049117  | 0.004539994 | 0.00893772  |
| TBX10     | 0.14904553   | 0.004540976 | 0.008938771 |
| ZNF282    | 0.149042829  | 0.004541716 | 0.008939344 |

|            |              |             |             |
|------------|--------------|-------------|-------------|
| INPP5B     | -0.149037181 | 0.004543264 | 0.008941506 |
| FCRL1      | -0.14900479  | 0.004552149 | 0.008957563 |
| STAT6      | -0.14900416  | 0.004552322 | 0.008957563 |
| IDH2       | -0.148960229 | 0.004564398 | 0.008980437 |
| C5orf43    | -0.148953986 | 0.004566117 | 0.008982592 |
| GAGE8      | 0.148952974  | 0.004566395 | 0.008982592 |
| PLEKHA6    | -0.148930773 | 0.004572512 | 0.008993735 |
| SOX30      | -0.148921942 | 0.004574946 | 0.00899731  |
| GPR65      | -0.148920903 | 0.004575233 | 0.00899731  |
| MTMR9L     | -0.148884367 | 0.00458532  | 0.009016256 |
| TGFB2      | -0.148873575 | 0.004588303 | 0.009021232 |
| CD9        | -0.148793912 | 0.004610379 | 0.009063741 |
| SEMA6A     | -0.148740585 | 0.00462521  | 0.009092001 |
| DKFZP434L1 | 0.14873346   | 0.004627195 | 0.009095005 |
| GDF3       | -0.148719291 | 0.004631145 | 0.00910187  |
| FZD10      | -0.148712581 | 0.004633016 | 0.009103943 |
| RAP1A      | -0.148712231 | 0.004633114 | 0.009103943 |
| CXorf65    | 0.148654232  | 0.004649318 | 0.009134883 |
| TFAM       | -0.148614977 | 0.004660315 | 0.009155585 |
| ZNF804A    | -0.148609444 | 0.004661866 | 0.00915773  |
| TSPAN8     | 0.148598185  | 0.004665026 | 0.009163032 |
| MUTED      | 0.148586136  | 0.004668409 | 0.009167657 |
| EVI2A      | -0.148585479 | 0.004668593 | 0.009167657 |
| IP6K1      | 0.148584881  | 0.004668761 | 0.009167657 |
| ZNF649     | -0.14856353  | 0.004674762 | 0.009178535 |
| ZFP14      | -0.148530243 | 0.004684131 | 0.009196024 |
| ABCB7      | -0.148513532 | 0.004688841 | 0.009204363 |
| PDLIM7     | 0.148506094  | 0.004690939 | 0.009207574 |
| TSPAN4     | 0.148459434  | 0.004704118 | 0.009232532 |
| IFT57      | -0.148409655 | 0.004718214 | 0.009259286 |
| MFGE8      | -0.148290134 | 0.004752216 | 0.009325095 |
| IL10RA     | -0.148250942 | 0.004763414 | 0.009346146 |
| DET1       | -0.148222775 | 0.004771476 | 0.009361043 |
| ZNF496     | -0.148203396 | 0.00477703  | 0.009371016 |
| GPR68      | -0.148168657 | 0.004787001 | 0.009389651 |
| DBF4       | 0.148126013  | 0.004799266 | 0.009412782 |
| BMP1       | -0.14812094  | 0.004800727 | 0.00941472  |
| TMEM80     | 0.148113617  | 0.004802837 | 0.00941793  |
| NAGA       | -0.148046506 | 0.00482221  | 0.009454988 |
| CCDC46     | -0.148029444 | 0.004827146 | 0.009463735 |
| SNORA12    | 0.148011368  | 0.004832381 | 0.009473065 |
| TAS2R31    | -0.14800554  | 0.00483407  | 0.009475443 |
| NKPD1      | 0.147959182  | 0.004847523 | 0.00950012  |
| VPS37D     | 0.147958872  | 0.004847613 | 0.00950012  |
| ZCCHC9     | 0.147953967  | 0.004849039 | 0.009501978 |
| FAM157A    | -0.147942164 | 0.00485247  | 0.009507767 |

|           |              |             |             |
|-----------|--------------|-------------|-------------|
| GTF2IRD2  | -0.147935684 | 0.004854355 | 0.009510524 |
| HIST1H2BH | 0.147922838  | 0.004858094 | 0.009516913 |
| FOXP1     | 0.147895001  | 0.004866204 | 0.009531863 |
| CDON      | -0.147880908 | 0.004870315 | 0.009538977 |
| TBC1D10A  | -0.147860517 | 0.004876268 | 0.009549697 |
| PLD2      | -0.147780467 | 0.004899702 | 0.009594647 |
| ZNF550    | -0.147769419 | 0.004902944 | 0.009600052 |
| GDA       | -0.147739463 | 0.004911745 | 0.009616339 |
| GRB7      | 0.147709829  | 0.004920465 | 0.009632464 |
| WDR6      | 0.147678017  | 0.004929842 | 0.009649872 |
| CD70      | 0.147647569  | 0.004938831 | 0.009666518 |
| YPEL5     | -0.147640229 | 0.004941    | 0.009669814 |
| C12orf69  | -0.147638134 | 0.00494162  | 0.009670075 |
| ST6GAL1   | -0.147590719 | 0.004955655 | 0.009696588 |
| ANKK1     | 0.147581793  | 0.004958302 | 0.009700813 |
| RIPK3     | -0.147574645 | 0.004960421 | 0.009704007 |
| LOC92249  | -0.147553582 | 0.004966674 | 0.009715284 |
| FAM138F   | 0.147524617  | 0.004975282 | 0.009731167 |
| SSH3      | -0.147521028 | 0.00497635  | 0.0097323   |
| NFATC1    | -0.147417218 | 0.005007321 | 0.009791908 |
| C14orf73  | 0.147410141  | 0.005009438 | 0.009795087 |
| LOC100131 | -0.147396451 | 0.005013537 | 0.009802139 |
| C12orf39  | 0.147394236  | 0.005014201 | 0.009802474 |
| AP3M1     | -0.147379074 | 0.005018744 | 0.009810393 |
| CORO1B    | 0.147367064  | 0.005022346 | 0.00981647  |
| C22orf13  | -0.147344947 | 0.005028984 | 0.009828481 |
| HOXA1     | -0.147307185 | 0.005040337 | 0.009849702 |
| ASCC1     | -0.147267577 | 0.00505227  | 0.009872053 |
| PIH1D2    | 0.147262198  | 0.005053892 | 0.009874254 |
| P2RY6     | 0.147257665  | 0.00505526  | 0.009875957 |
| FEZ1      | -0.147204263 | 0.005071397 | 0.009906511 |
| GOLGA6L9  | 0.147191698  | 0.005075201 | 0.009912969 |
| PTPRS     | -0.14717618  | 0.005079902 | 0.009921178 |
| HOXD11    | 0.14717168   | 0.005081266 | 0.009922869 |
| GHRLOS    | 0.147158318  | 0.005085318 | 0.009929808 |
| KDEL2     | 0.147152124  | 0.005087198 | 0.009932504 |
| YBX2      | 0.147122966  | 0.005096053 | 0.009948819 |
| SLC30A3   | 0.147118618  | 0.005097375 | 0.009950423 |
| C2CD4C    | -0.147073893 | 0.005110988 | 0.00997602  |
| POM121L8P | -0.147069026 | 0.005112472 | 0.009977937 |
| GTPBP1    | -0.147060956 | 0.005114932 | 0.009981761 |
| CCDC88C   | -0.147058161 | 0.005115784 | 0.009982446 |
| CCNC      | -0.147043785 | 0.005120171 | 0.009990027 |
| ALDH16A1  | 0.147017745  | 0.005128125 | 0.010004565 |
| HPGD      | -0.146984735 | 0.005138224 | 0.010023286 |
| WIF1      | 0.146969903  | 0.005142767 | 0.010031166 |

|           |              |             |             |
|-----------|--------------|-------------|-------------|
| ADAM21P1  | -0.146962352 | 0.005145082 | 0.010034698 |
| SNAR-C4   | 0.146957691  | 0.005146511 | 0.010036502 |
| MRPL30    | 0.146952902  | 0.005147979 | 0.010038383 |
| ATP6V0A1  | 0.146855307  | 0.005177993 | 0.010095921 |
| AGER      | 0.146839397  | 0.005182901 | 0.0101045   |
| GART      | -0.146819173 | 0.005189145 | 0.010115684 |
| C6orf162  | 0.146810989  | 0.005191674 | 0.010119623 |
| TMEM198   | 0.146770414  | 0.005204228 | 0.010143101 |
| C2orf62   | 0.146759494  | 0.005207612 | 0.010148702 |
| PCK1      | -0.146749954 | 0.005210569 | 0.010153472 |
| ACOT2     | -0.146739604 | 0.005213779 | 0.010158734 |
| GCSH      | -0.146732789 | 0.005215894 | 0.01016186  |
| TDRD1     | -0.146710866 | 0.005222702 | 0.010174128 |
| SLC22A2   | -0.146698922 | 0.005226415 | 0.010180365 |
| ASFMR1    | -0.146683966 | 0.005231067 | 0.010187854 |
| C1orf38   | -0.146683272 | 0.005231283 | 0.010187854 |
| SUZ12P    | 0.146679692  | 0.005232397 | 0.010189028 |
| TAF7L     | -0.146676456 | 0.005233404 | 0.010189993 |
| GPATCH2   | -0.146588833 | 0.005260746 | 0.010242177 |
| C1orf126  | -0.146587272 | 0.005261234 | 0.010242177 |
| RAB4A     | 0.146549092  | 0.005273189 | 0.010264447 |
| BCAP29    | -0.146526547 | 0.005280259 | 0.010277205 |
| XCL2      | 0.14652031   | 0.005282217 | 0.010279476 |
| CPM       | -0.146519541 | 0.005282458 | 0.010279476 |
| LRRC47    | 0.14649469   | 0.005290265 | 0.010293662 |
| LOC644936 | -0.146422784 | 0.005312912 | 0.010336013 |
| VSIG4     | -0.146422287 | 0.005313069 | 0.010336013 |
| NPEPPS    | -0.14640633  | 0.005318106 | 0.010344802 |
| EEF1A1P9  | 0.146367238  | 0.005330466 | 0.010367831 |
| OR7E5P    | 0.146362375  | 0.005332005 | 0.010369813 |
| GFOD1     | -0.146350118 | 0.005335887 | 0.010376348 |
| C9orf103  | 0.146288527  | 0.005355429 | 0.010413335 |
| GYG1      | 0.146277544  | 0.005358921 | 0.010419107 |
| ZNF473    | 0.146207085  | 0.00538137  | 0.010461732 |
| AAA1      | 0.146202247  | 0.005382915 | 0.010463714 |
| TSPY2     | 0.146177405  | 0.005390852 | 0.010478119 |
| STK36     | -0.146154066 | 0.005398318 | 0.010491608 |
| FAM189A2  | -0.146150967 | 0.00539931  | 0.010492512 |
| SERPINF2  | 0.146131654  | 0.005405497 | 0.01050351  |
| TUBB2B    | 0.146083681  | 0.005420892 | 0.010532396 |
| LIPM      | -0.146075625 | 0.005423481 | 0.010536384 |
| LOC100130 | 0.146074002  | 0.005424002 | 0.010536384 |
| SIGLEC8   | -0.146045564 | 0.005433152 | 0.010553128 |
| IQCK      | -0.146043134 | 0.005433934 | 0.010553618 |
| ATP9A     | -0.146023465 | 0.005440271 | 0.010564895 |
| MAPK8IP1  | -0.14600491  | 0.005446255 | 0.010575485 |

|           |              |             |             |
|-----------|--------------|-------------|-------------|
| INTS1     | 0.14594023   | 0.005467161 | 0.010615045 |
| USH2A     | -0.145930035 | 0.005470463 | 0.010620421 |
| MRPS6     | 0.14591459   | 0.005475469 | 0.010629102 |
| UTS2      | 0.145901374  | 0.005479755 | 0.010636387 |
| PCDH1     | -0.145890398 | 0.005483318 | 0.010642264 |
| GRB2      | 0.145874345  | 0.005488531 | 0.010651345 |
| RICH2     | -0.145768205 | 0.005523116 | 0.010717417 |
| ERAS      | 0.145750866  | 0.005528784 | 0.01072737  |
| SIPA1     | 0.145744954  | 0.005530718 | 0.010730077 |
| OR52N4    | -0.1456846   | 0.005550495 | 0.010767398 |
| BTF3L4    | 0.145624279  | 0.005570325 | 0.010804813 |
| MMGT1     | -0.14560941  | 0.005575223 | 0.010813261 |
| MIER2     | 0.145602331  | 0.005577556 | 0.010816733 |
| RAPSN     | 0.145595154  | 0.005579922 | 0.010820267 |
| C1orf27   | -0.14558047  | 0.005584766 | 0.010828607 |
| PTN       | -0.145536789 | 0.005599199 | 0.010855535 |
| NGFRAP1   | 0.145529857  | 0.005601493 | 0.010858924 |
| SLC26A4   | -0.145521117 | 0.005604386 | 0.010863475 |
| BLMH      | 0.145514023  | 0.005606735 | 0.010866971 |
| ABCC6     | -0.145484332 | 0.005616576 | 0.010884986 |
| CMTM3     | 0.145476558  | 0.005619156 | 0.010888925 |
| FAIM3     | -0.145464258 | 0.005623239 | 0.010895777 |
| MTSS1L    | -0.145446329 | 0.005629196 | 0.010906258 |
| HIST1H2AK | -0.145417141 | 0.005638905 | 0.010924006 |
| BCL6      | -0.145409164 | 0.005641561 | 0.010928089 |
| CDCA7L    | 0.145405584  | 0.005642753 | 0.010929336 |
| SFRS5     | -0.145394874 | 0.005646322 | 0.010935114 |
| ZXDC      | -0.145391757 | 0.005647361 | 0.010935114 |
| TNFRSF12A | 0.145391688  | 0.005647384 | 0.010935114 |
| CHST8     | -0.145389476 | 0.005648121 | 0.010935479 |
| ADCYAP1   | -0.145378364 | 0.005651827 | 0.01094159  |
| LOC100129 | 0.145336886  | 0.005665679 | 0.010967341 |
| CHMP2B    | -0.145334309 | 0.005666541 | 0.010967943 |
| CSNK1G1   | -0.145307802 | 0.00567541  | 0.010983449 |
| OSBPL10   | -0.14530707  | 0.005675655 | 0.010983449 |
| AQP7P1    | 0.145291465  | 0.005680883 | 0.010992497 |
| MYO3B     | -0.145271257 | 0.005687659 | 0.01100454  |
| TMEM86B   | 0.145263885  | 0.005690133 | 0.011008256 |
| WDR76     | 0.145257871  | 0.005692151 | 0.011011092 |
| LONP1     | 0.14524855   | 0.005695281 | 0.011016077 |
| C20orf3   | -0.145190739 | 0.005714729 | 0.011052621 |
| CCR2      | -0.145173857 | 0.00572042  | 0.01106254  |
| ASPM      | 0.145172229  | 0.005720969 | 0.01106254  |
| EDA       | -0.145167613 | 0.005722526 | 0.011064476 |
| B3GALT5   | -0.145156334 | 0.005726332 | 0.01107076  |
| RBPJL     | 0.145150896  | 0.005728168 | 0.011073235 |



|           |              |             |             |
|-----------|--------------|-------------|-------------|
| C3orf48   | -0.145142949 | 0.005730852 | 0.011077347 |
| GABRG1    | -0.145135592 | 0.005733337 | 0.011081076 |
| RNASE1    | 0.145112327  | 0.005741203 | 0.011095203 |
| ZNF431    | -0.145101485 | 0.005744873 | 0.011101217 |
| ITM2C     | 0.145074429  | 0.005754038 | 0.011117849 |
| TMCO3     | -0.145048984 | 0.00576267  | 0.011133447 |
| FSD2      | -0.145012184 | 0.005775174 | 0.011156523 |
| TEAD4     | 0.14500895   | 0.005776274 | 0.011157566 |
| TAF5      | 0.144999692  | 0.005779425 | 0.011162568 |
| TNFRSF13B | 0.144958378  | 0.005793501 | 0.01118867  |
| MYF6      | 0.144928984  | 0.005803535 | 0.011206962 |
| CTNBP1    | 0.144911435  | 0.005809533 | 0.011217457 |
| CHRM3     | -0.144908486 | 0.005810541 | 0.011218316 |
| RHOU      | -0.144906749 | 0.005811135 | 0.011218375 |
| NKD2      | -0.144868702 | 0.005824161 | 0.011242432 |
| ZNF461    | -0.144855288 | 0.00582876  | 0.011250219 |
| DDX58     | -0.144851527 | 0.00583005  | 0.011251618 |
| FAM187B   | 0.144844886  | 0.005832329 | 0.011254925 |
| CXorf42   | 0.144771225  | 0.005857654 | 0.011302701 |
| CPNE7     | 0.144762522  | 0.005860653 | 0.011307392 |
| NFYA      | 0.144755554  | 0.005863055 | 0.01131093  |
| CCL11     | -0.144737632 | 0.005869237 | 0.011321759 |
| ETV6      | -0.144701445 | 0.005881736 | 0.011344772 |
| BIK       | 0.144698599  | 0.00588272  | 0.011345572 |
| C21orf62  | -0.144663062 | 0.005895021 | 0.011368194 |
| FAM20B    | -0.144661128 | 0.005895691 | 0.011368385 |
| PLCB2     | -0.14465638  | 0.005897336 | 0.011370457 |
| RAPGEFL1  | 0.144611229  | 0.005913003 | 0.01139956  |
| FASN      | -0.144589647 | 0.005920505 | 0.011412918 |
| EIF4A2    | -0.144577945 | 0.005924576 | 0.01141966  |
| UTP3      | -0.144508838 | 0.00594867  | 0.011464992 |
| SAMM50    | 0.144480353  | 0.005958627 | 0.01148307  |
| FAM57B    | 0.144471729  | 0.005961644 | 0.011487774 |
| FAM48B2   | -0.14446699  | 0.005963303 | 0.011489858 |
| LIMS2     | -0.144452286 | 0.005968452 | 0.011498667 |
| PYHIN1    | -0.144431457 | 0.005975753 | 0.011511619 |
| PEX7      | -0.144429175 | 0.005976553 | 0.011512047 |
| PSORS1C1  | 0.144406017  | 0.005984681 | 0.011526588 |
| LGALS9B   | -0.144386931 | 0.005991386 | 0.011538387 |
| TYR       | -0.144351865 | 0.006003725 | 0.01156103  |
| CSDE1     | -0.14428077  | 0.00602881  | 0.011608069 |
| FAM123B   | -0.144279333 | 0.006029318 | 0.011608069 |
| ENOX1     | -0.144266787 | 0.006033755 | 0.011615488 |
| LYZ       | 0.144226097  | 0.006048165 | 0.011642103 |
| ZBTB32    | 0.144220148  | 0.006050274 | 0.011645038 |
| C11orf82  | 0.14418306   | 0.006063439 | 0.01166925  |

|           |              |             |             |
|-----------|--------------|-------------|-------------|
| DCPS      | 0.144174664  | 0.006066423 | 0.011673864 |
| RCC2      | 0.144111436  | 0.006088937 | 0.011716055 |
| PREB      | 0.144098549  | 0.006093535 | 0.01172377  |
| PEX2      | 0.144062424  | 0.00610644  | 0.011747464 |
| DNMT1     | -0.144056086 | 0.006108706 | 0.01175069  |
| KLHDC2    | -0.144048995 | 0.006111244 | 0.01175324  |
| RANBP3    | 0.144047567  | 0.006111755 | 0.01175324  |
| STK35     | -0.144047432 | 0.006111803 | 0.01175324  |
| CDC42BPG  | -0.144018093 | 0.00612231  | 0.011772016 |
| BTN3A1    | -0.144016869 | 0.006122749 | 0.011772016 |
| NOL8      | -0.143996052 | 0.006130215 | 0.011785233 |
| NEUROD4   | 0.143991318  | 0.006131914 | 0.011787361 |
| GNS       | -0.143984303 | 0.006134432 | 0.011791064 |
| ENDOU     | -0.143978145 | 0.006136643 | 0.011794176 |
| LOC339535 | 0.143949477  | 0.006146948 | 0.01181284  |
| GOLGA6D   | -0.143944887 | 0.006148599 | 0.011814873 |
| KCNK15    | -0.143915998 | 0.006159001 | 0.011833719 |
| PTPN14    | -0.143891612 | 0.006167794 | 0.01184947  |
| GRIN2A    | -0.143800502 | 0.006200745 | 0.011911222 |
| YIPF2     | 0.143799433  | 0.006201132 | 0.011911222 |
| VPS33A    | 0.143797142  | 0.006201963 | 0.011911669 |
| UBR5      | -0.143763711 | 0.006214095 | 0.01193382  |
| LOC401588 | -0.143732262 | 0.006225528 | 0.011954623 |
| INPP5K    | 0.143725192  | 0.006228101 | 0.01195841  |
| HNRNPK    | -0.143707957 | 0.006234376 | 0.011969306 |
| PVRL2     | 0.143702364  | 0.006236414 | 0.011972064 |
| PIM2      | 0.14368379   | 0.006243186 | 0.011983909 |
| HOXC9     | 0.14367923   | 0.006244849 | 0.011985946 |
| RNF19B    | -0.143666883 | 0.006249355 | 0.011993439 |
| MYST1     | 0.14365867   | 0.006252355 | 0.011998038 |
| ABCC1     | -0.143649935 | 0.006255546 | 0.012003005 |
| IGFBP2    | 0.143633702  | 0.00626148  | 0.012013234 |
| ATP2A3    | -0.143616905 | 0.006267625 | 0.012023866 |
| TRPM8     | -0.14354773  | 0.006292991 | 0.012071366 |
| SVOP      | 0.143534455  | 0.00629787  | 0.012079534 |
| PDC       | -0.143532843 | 0.006298463 | 0.012079534 |
| VSIG2     | -0.143506391 | 0.006308194 | 0.012096754 |
| NAP1L3    | -0.143505136 | 0.006308656 | 0.012096754 |
| HBD       | -0.143464746 | 0.006323543 | 0.012124131 |
| SNORD116- | -0.14344355  | 0.006331367 | 0.012137965 |
| CAMKV     | 0.143383928  | 0.006353424 | 0.012179078 |
| LST-3TM12 | -0.143369056 | 0.006358937 | 0.012188472 |
| LIPI      | -0.143361792 | 0.006361631 | 0.012192463 |
| CYBA      | 0.143335043  | 0.00637156  | 0.012210318 |
| DNAJA3    | -0.143331901 | 0.006372728 | 0.01221138  |
| ZFP41     | 0.14328744   | 0.006389265 | 0.012241891 |

|           |              |             |             |
|-----------|--------------|-------------|-------------|
| SAMD12    | -0.143282074 | 0.006391264 | 0.012244542 |
| SEPHS2    | 0.143252033  | 0.006402463 | 0.012264818 |
| TFE3      | -0.143209038 | 0.006418521 | 0.012294398 |
| LOC283267 | -0.143207058 | 0.006419262 | 0.012294633 |
| CA9       | 0.143195697  | 0.006423512 | 0.01230159  |
| CYGB      | -0.143188077 | 0.006426363 | 0.012305868 |
| GABRA1    | 0.143171326  | 0.006432636 | 0.012316696 |
| SCARNA10  | 0.14316687   | 0.006434306 | 0.012318709 |
| DAPP1     | -0.143147114 | 0.006441713 | 0.012331704 |
| FXYD1     | 0.1431217    | 0.006451253 | 0.01234878  |
| GJB4      | -0.143111301 | 0.00645516  | 0.012355071 |
| RNF157    | 0.143077522  | 0.006467867 | 0.012378202 |
| CPVL      | 0.143042071  | 0.006481226 | 0.012402577 |
| ADAM28    | -0.143040011 | 0.006482003 | 0.012402872 |
| TEKT5     | 0.143020509  | 0.006489364 | 0.012415764 |
| KRTAP5-7  | 0.143006914  | 0.006494499 | 0.012424395 |
| ZNF260    | -0.142993256 | 0.006499662 | 0.012433078 |
| RYR2      | -0.142957902 | 0.006513044 | 0.012457479 |
| PRR23C    | 0.14295531   | 0.006514026 | 0.01245816  |
| UBE2B     | 0.142933273  | 0.00652238  | 0.012472941 |
| RABEP2    | 0.14291616   | 0.006528875 | 0.012484162 |
| ENHO      | 0.142883624  | 0.006541239 | 0.012506602 |
| ALG12     | 0.142851744  | 0.006553373 | 0.0125286   |
| ANKRD26P1 | 0.142832477  | 0.006560717 | 0.012541435 |
| ZNF620    | 0.142823421  | 0.006564171 | 0.012546834 |
| CDC42EP1  | 0.142813505  | 0.006567955 | 0.012552862 |
| TRPA1     | -0.142811705 | 0.006568642 | 0.01255297  |
| PARP1     | 0.142755737  | 0.006590039 | 0.012592652 |
| MRPL16    | 0.142738564  | 0.006596616 | 0.012604011 |
| NOMO3     | 0.142727598  | 0.006600819 | 0.012610833 |
| HMMR      | 0.142718239  | 0.006604409 | 0.01261648  |
| CPA2      | 0.142712776  | 0.006606505 | 0.012619273 |
| CLUAP1    | 0.142708608  | 0.006608105 | 0.012621118 |
| IWS1      | -0.142606727 | 0.00664731  | 0.01269478  |
| PCGF2     | -0.142588005 | 0.006654537 | 0.012707365 |
| KCTD5     | -0.142586139 | 0.006655257 | 0.012707522 |
| C17orf97  | -0.142551778 | 0.006668541 | 0.012731666 |
| GLB1L3    | 0.142540898  | 0.006672752 | 0.01273794  |
| SLA       | -0.142539982 | 0.006673107 | 0.01273794  |
| MAGEA9B   | 0.142504621  | 0.00668681  | 0.012762874 |
| MAOA      | -0.142475189 | 0.006698235 | 0.012783456 |
| SDHAP3    | 0.142470134  | 0.006700199 | 0.012785979 |
| ICOSLG    | -0.142437762 | 0.006712789 | 0.012808777 |
| VEPH1     | -0.142423709 | 0.006718261 | 0.01281799  |
| ARL6IP6   | -0.142395543 | 0.00672924  | 0.012837707 |
| SKA2      | 0.14238981   | 0.006731477 | 0.012840744 |

|           |              |             |             |
|-----------|--------------|-------------|-------------|
| SYNCRIP   | -0.142368141 | 0.006739937 | 0.012855651 |
| KLHDC7A   | -0.142302426 | 0.006765653 | 0.012903464 |
| COL16A1   | -0.142290062 | 0.006770501 | 0.012911474 |
| C16orf74  | 0.142288267  | 0.006771204 | 0.012911579 |
| EPHA1     | -0.142230471 | 0.00679391  | 0.012952759 |
| RABL5     | 0.142229986  | 0.006794101 | 0.012952759 |
| TBC1D26   | 0.142222973  | 0.006796861 | 0.01295678  |
| P2RY11    | 0.142186227  | 0.006811338 | 0.012983134 |
| RASGRP4   | -0.142170111 | 0.006817695 | 0.012994009 |
| C5orf60   | 0.142144986  | 0.006827618 | 0.013011676 |
| ZNF419    | 0.142081801  | 0.006852629 | 0.013057397 |
| TTY10     | -0.142081066 | 0.00685292  | 0.013057397 |
| LOC284837 | -0.142076722 | 0.006854643 | 0.013059429 |
| LOC678655 | 0.142036726  | 0.006870522 | 0.013088429 |
| DKK4      | 0.142022954  | 0.006875996 | 0.013097606 |
| KRTAP10-4 | -0.142011706 | 0.006880471 | 0.013104876 |
| ELOVL3    | 0.141988628  | 0.00688966  | 0.013121122 |
| TRMT61B   | -0.141927621 | 0.006914004 | 0.013166225 |
| PLA1A     | -0.141918935 | 0.006917476 | 0.013171578 |
| MGC45800  | -0.141911578 | 0.006920418 | 0.01317592  |
| WDR91     | -0.141899058 | 0.006925428 | 0.013184198 |
| NRGN      | 0.141840333  | 0.006948968 | 0.013227748 |
| GLRX5     | 0.141834654  | 0.006951248 | 0.013230824 |
| APBB3     | -0.141829792 | 0.006953201 | 0.013233276 |
| FAM27B    | 0.141818933  | 0.006957564 | 0.013240314 |
| SPOP      | 0.14178969   | 0.006969326 | 0.013261431 |
| FAM83F    | -0.141755243 | 0.006983204 | 0.013286568 |
| SLC25A13  | -0.141729463 | 0.006993606 | 0.013305089 |
| CD52      | 0.141647218  | 0.007026886 | 0.013367125 |
| STAU1     | -0.141612545 | 0.007040958 | 0.013392614 |
| PRELID2   | 0.141577869  | 0.007055056 | 0.01341815  |
| SCG3      | 0.141569284  | 0.007058551 | 0.013423514 |
| APOD      | -0.141564524 | 0.007060489 | 0.013425917 |
| WWP2      | -0.141561573 | 0.007061691 | 0.01342662  |
| HEATR7B2  | 0.141560307  | 0.007062206 | 0.01342662  |
| BDH2      | -0.141537448 | 0.007071523 | 0.013443048 |
| MEG8      | 0.141530546  | 0.007074338 | 0.013447116 |
| FAT2      | -0.141434404 | 0.007113655 | 0.013520561 |
| C15orf54  | -0.141419086 | 0.007119937 | 0.01353121  |
| C4orf47   | 0.141413476  | 0.007122239 | 0.013534294 |
| CREG1     | -0.141411276 | 0.007123142 | 0.013534718 |
| CST4      | 0.141366597  | 0.007141502 | 0.013568309 |
| PIWIL2    | -0.141317521 | 0.007161717 | 0.013605419 |
| CCL22     | -0.141310273 | 0.007164707 | 0.0136098   |
| CEP250    | 0.141306672  | 0.007166193 | 0.013611325 |
| CXXC4     | -0.141289499 | 0.007173284 | 0.013623492 |

|           |              |             |             |
|-----------|--------------|-------------|-------------|
| HAUS6     | -0.141268932 | 0.007181783 | 0.013638333 |
| LIN7A     | 0.141265791  | 0.007183081 | 0.013639499 |
| GTDC1     | -0.141256999 | 0.007186718 | 0.013645104 |
| IGF2BP2   | 0.141248732  | 0.007190139 | 0.013650297 |
| PDLIM2    | -0.141222    | 0.007201211 | 0.013667771 |
| PCBD2     | -0.141221906 | 0.00720125  | 0.013667771 |
| GJB3      | -0.14122154  | 0.007201402 | 0.013667771 |
| DPRXP4    | -0.141218276 | 0.007202755 | 0.013669036 |
| ZNF227    | -0.141194433 | 0.007212645 | 0.013686501 |
| BCAN      | 0.141169045  | 0.00722319  | 0.013705204 |
| LOC100132 | 0.141139141  | 0.007235627 | 0.013727496 |
| CLK3      | 0.141092974  | 0.007254867 | 0.013762685 |
| RAB34     | 0.141090039  | 0.007256091 | 0.013763698 |
| GPR15     | -0.14108294  | 0.007259055 | 0.013768007 |
| RAB37     | 0.14106893   | 0.007264905 | 0.013777791 |
| FAM138E   | 0.141056736  | 0.007270001 | 0.013786142 |
| TMED3     | 0.141049257  | 0.007273128 | 0.013790759 |
| PTGIR     | -0.141045848 | 0.007274553 | 0.013791331 |
| UBASH3B   | -0.141045224 | 0.007274814 | 0.013791331 |
| ERCC3     | -0.141035003 | 0.00727909  | 0.013798123 |
| ADH1C     | -0.141026233 | 0.007282761 | 0.013803768 |
| LYRM1     | 0.140940204  | 0.007318858 | 0.013870866 |
| SDC2      | 0.140929835  | 0.00732322  | 0.013877812 |
| ASB11     | -0.140921139 | 0.007326879 | 0.013883425 |
| C14orf33  | 0.140912955  | 0.007330325 | 0.013888633 |
| FHOD1     | -0.140909658 | 0.007331713 | 0.013889942 |
| CHST11    | -0.140895606 | 0.007337634 | 0.013899837 |
| PABPC1L2A | 0.140892896  | 0.007338777 | 0.013900679 |
| SKP2      | -0.14087458  | 0.007346501 | 0.013913987 |
| CIDEC     | 0.140853299  | 0.007355485 | 0.013929677 |
| LILRA6    | -0.14082209  | 0.007368678 | 0.013953335 |
| PRKCB     | -0.140808074 | 0.00737461  | 0.013963241 |
| GDI2      | 0.140792292  | 0.007381295 | 0.013974568 |
| ZMYND8    | -0.140789585 | 0.007382442 | 0.013975412 |
| KCNAB1    | -0.140737396 | 0.007404588 | 0.014014794 |
| SPTBN2    | -0.140737243 | 0.007404653 | 0.014014794 |
| C17orf87  | -0.140728807 | 0.007408239 | 0.014020248 |
| C4orf38   | -0.140714263 | 0.007414424 | 0.01403062  |
| LOC149134 | 0.14067344   | 0.007431809 | 0.014062183 |
| CYP4B1    | -0.140664255 | 0.007435725 | 0.014068256 |
| IGFN1     | -0.140645259 | 0.007443831 | 0.014082255 |
| CEPT1     | -0.140628776 | 0.007450871 | 0.014094235 |
| CCDC9     | 0.140609358  | 0.007459172 | 0.014107488 |
| GRPR      | -0.140609072 | 0.007459295 | 0.014107488 |
| PLEKHG3   | -0.140575207 | 0.007473792 | 0.014132624 |
| OXSM      | 0.140574712  | 0.007474004 | 0.014132624 |

|           |              |             |             |
|-----------|--------------|-------------|-------------|
| C8orf83   | -0.140526348 | 0.007494752 | 0.014170511 |
| C3orf34   | -0.140523024 | 0.00749618  | 0.014171866 |
| ESRRB     | -0.140486222 | 0.007512006 | 0.014200437 |
| CHMP5     | -0.140461055 | 0.007522845 | 0.014219577 |
| PSPN      | 0.140445911  | 0.007529374 | 0.014230568 |
| C15orf2   | -0.140422322 | 0.007539554 | 0.014248456 |
| CN5H6.4   | 0.140391057  | 0.007553066 | 0.014272636 |
| SH2D6     | 0.140367697  | 0.007563176 | 0.014290384 |
| RBKS      | 0.14027767   | 0.007602251 | 0.014362852 |
| MINA      | 0.140270962  | 0.007605169 | 0.014367003 |
| PRSS37    | -0.140267078 | 0.00760686  | 0.014368833 |
| IFI44     | -0.140240888 | 0.007618267 | 0.014389016 |
| RIN3      | -0.140237535 | 0.007619728 | 0.014390412 |
| DDX47     | 0.140233358  | 0.00762155  | 0.014392486 |
| ZNF276    | -0.140215209 | 0.007629467 | 0.014406071 |
| GNG8      | 0.140157945  | 0.007654494 | 0.014451958 |
| NACAD     | -0.140153801 | 0.007656308 | 0.014454013 |
| LEMD1     | 0.140141086  | 0.007661877 | 0.014463154 |
| STAT1     | -0.140125518 | 0.007668699 | 0.014474661 |
| C14orf143 | 0.140090546  | 0.007684045 | 0.014502252 |
| TNIP1     | 0.140059269  | 0.007697793 | 0.014526822 |
| IQUB      | -0.14003427  | 0.007708798 | 0.014546162 |
| METTL4    | -0.14003267  | 0.007709503 | 0.014546162 |
| PPP1R1B   | 0.139997019  | 0.007725221 | 0.014573934 |
| C20orf134 | 0.139995968  | 0.007725685 | 0.014573934 |
| CUL3      | -0.139977538 | 0.007733823 | 0.014587903 |
| GABRG2    | 0.139973786  | 0.00773548  | 0.014589648 |
| TIGD7     | 0.139892318  | 0.00777155  | 0.01465629  |
| FCGR3B    | -0.139848696 | 0.007790925 | 0.014691438 |
| ZCCHC18   | -0.139818001 | 0.007804584 | 0.014715802 |
| CNPY4     | 0.13980634   | 0.007809779 | 0.014724203 |
| CMAS      | -0.139706098 | 0.007854563 | 0.014807234 |
| TNFRSF11A | -0.139675374 | 0.007868335 | 0.014831792 |
| HIST1H4A  | 0.139668433  | 0.007871449 | 0.014836258 |
| ODAM      | 0.139657786  | 0.007876228 | 0.014843861 |
| MORC4     | -0.139641277 | 0.007883643 | 0.014855931 |
| ARHGAP28  | -0.139638739 | 0.007884784 | 0.014855931 |
| ALG1      | 0.139638548  | 0.00788487  | 0.014855931 |
| POP1      | 0.139636537  | 0.007885774 | 0.014856228 |
| ATP2B2    | -0.139626289 | 0.007890381 | 0.014863502 |
| DEFA6     | 0.139612981  | 0.007896368 | 0.014873372 |
| INF2      | -0.13960821  | 0.007898515 | 0.01487601  |
| TIFAB     | 0.139591959  | 0.007905833 | 0.014888385 |
| ALDOB     | -0.139540179 | 0.007929191 | 0.014930961 |
| ALMS1P    | -0.139522485 | 0.007937187 | 0.014944604 |
| NCRNA0008 | -0.139507617 | 0.007943911 | 0.014955851 |

|          |              |             |             |
|----------|--------------|-------------|-------------|
| FZD3     | -0.139472108 | 0.007959991 | 0.014984708 |
| FOLR2    | 0.13944947   | 0.007970258 | 0.015002616 |
| MPHOSPH6 | 0.139416354  | 0.007985297 | 0.015029505 |
| CCDC88A  | -0.139404241 | 0.007990805 | 0.01503845  |
| FAM182A  | 0.139391414  | 0.007996641 | 0.015048011 |
| PGAP3    | 0.139385513  | 0.007999327 | 0.015051643 |
| CA5B     | -0.139376877 | 0.008003259 | 0.01505762  |
| FBXW10   | 0.139373288  | 0.008004894 | 0.015059273 |
| TRIT1    | 0.139302377  | 0.008037254 | 0.015118723 |
| C11orf90 | -0.139293321 | 0.008041395 | 0.015125084 |
| B3GNT1   | 0.139287299  | 0.00804415  | 0.015128836 |
| EEF2     | -0.139275048 | 0.008049757 | 0.015137952 |
| C1orf63  | -0.139235254 | 0.008067993 | 0.015170814 |
| DTHD1    | -0.139227943 | 0.008071348 | 0.015175688 |
| GPR113   | -0.139200844 | 0.008083792 | 0.015197651 |
| ANP32C   | 0.139161637  | 0.008101826 | 0.015230118 |
| AVPR2    | -0.139153997 | 0.008105345 | 0.015235295 |
| OR14J1   | 0.139129565  | 0.008116606 | 0.015255022 |
| CBFB     | -0.139117079 | 0.008122366 | 0.015263324 |
| USP30    | -0.139116667 | 0.008122556 | 0.015263324 |
| CYP7B1   | -0.139111777 | 0.008124814 | 0.015266125 |
| PRPS2    | -0.139049856 | 0.008153442 | 0.015318471 |
| MFSD7    | -0.139011922 | 0.008171024 | 0.015350056 |
| AP3B1    | -0.138995588 | 0.008178605 | 0.015362849 |
| CD8B     | 0.138988134  | 0.008182067 | 0.015367903 |
| FMNL1    | -0.138984963 | 0.00818354  | 0.01536922  |
| SLC22A17 | -0.138913355 | 0.008216868 | 0.015430357 |
| POTEE    | -0.138890763 | 0.008227408 | 0.015448693 |
| GRAP     | -0.13886744  | 0.008238302 | 0.01546769  |
| ZFYVE20  | -0.138865196 | 0.008239351 | 0.015468201 |
| PYY      | 0.138847371  | 0.008247686 | 0.015482389 |
| RYR1     | -0.138822823 | 0.008259177 | 0.015502499 |
| PHLPP1   | -0.13879271  | 0.008273293 | 0.015527531 |
| ZNF395   | -0.138771864 | 0.008283078 | 0.01554443  |
| UBXN8    | -0.138752573 | 0.008292142 | 0.015559974 |
| CCDC76   | -0.138739526 | 0.008298276 | 0.015570018 |
| ABCB4    | -0.138728819 | 0.008303314 | 0.015578003 |
| ZNF324B  | -0.138678362 | 0.008327091 | 0.015619703 |
| CNBP     | 0.138678323  | 0.00832711  | 0.015619703 |
| TYW1B    | -0.138655507 | 0.008337882 | 0.015638436 |
| FLJ45079 | -0.138642584 | 0.008343988 | 0.015648415 |
| GCLM     | -0.138636887 | 0.008346681 | 0.015651992 |
| LRP12    | -0.138634063 | 0.008348016 | 0.015653022 |
| VAMP1    | -0.138598591 | 0.008364806 | 0.015683027 |
| MRPS27   | 0.138556452  | 0.00838479  | 0.015719015 |
| HHEX     | 0.138535418  | 0.008394781 | 0.015736264 |

|           |              |             |             |
|-----------|--------------|-------------|-------------|
| C13orf35  | 0.138532395  | 0.008396218 | 0.015737476 |
| S100A6    | 0.138522746  | 0.008400806 | 0.015744593 |
| SIGLECP3  | -0.138497965 | 0.008412598 | 0.015764024 |
| UBFD1     | -0.138497632 | 0.008412756 | 0.015764024 |
| CA1       | -0.138465147 | 0.008428237 | 0.015791546 |
| ZNF223    | -0.138439239 | 0.008440602 | 0.015813225 |
| LOC100272 | -0.138433383 | 0.008443399 | 0.015816977 |
| PRMT5     | 0.138385262  | 0.008466414 | 0.0158586   |
| BTRC      | -0.138372319 | 0.008472614 | 0.015868721 |
| GJB7      | 0.138357793  | 0.008479577 | 0.015880269 |
| LOC338588 | -0.138340943 | 0.00848766  | 0.015893912 |
| TSPAN17   | 0.138322491  | 0.00849652  | 0.015909008 |
| FLVCR2    | -0.13831429  | 0.008500461 | 0.015914889 |
| STAC3     | 0.13830337   | 0.00850571  | 0.01592322  |
| CDK5R1    | -0.138297073 | 0.008508739 | 0.015927392 |
| GEMIN8    | 0.138252217  | 0.008530338 | 0.015966324 |
| PAPSS1    | -0.138196148 | 0.008557406 | 0.016015482 |
| LETMD1    | 0.138187696  | 0.008561493 | 0.016021625 |
| SMARCD1   | 0.138168264  | 0.008570896 | 0.016037714 |
| EXOSC10   | 0.138153558  | 0.008578018 | 0.016048757 |
| UPP2      | -0.138152751 | 0.008578409 | 0.016048757 |
| PRKCA     | -0.138148683 | 0.00858038  | 0.016050937 |
| HBEGF     | -0.138124763 | 0.008591978 | 0.016071123 |
| NICN1     | 0.13810403   | 0.008602043 | 0.016088438 |
| ZNF311    | -0.138087225 | 0.008610208 | 0.016102198 |
| OSTF1     | -0.138068412 | 0.008619358 | 0.016117794 |
| ZNF747    | -0.138058901 | 0.008623987 | 0.016124936 |
| FGF13     | -0.138045495 | 0.008630514 | 0.016135626 |
| LAMC1     | -0.138023507 | 0.008641231 | 0.016154147 |
| ELF3      | 0.137982896  | 0.008661056 | 0.016189687 |
| KRT24     | 0.137962393  | 0.00867108  | 0.016206903 |
| ZNF835    | -0.137958961 | 0.008672759 | 0.01620852  |
| FHOD3     | -0.137954769 | 0.00867481  | 0.016210832 |
| UBTF      | 0.13795041   | 0.008676943 | 0.016213163 |
| SFMBT1    | -0.137948893 | 0.008677685 | 0.016213163 |
| WBP2NL    | -0.137893868 | 0.008704657 | 0.01626203  |
| LOC253039 | 0.137873433  | 0.008714692 | 0.016279251 |
| PRKAB2    | -0.137871511 | 0.008715636 | 0.016279488 |
| CADM3     | -0.137831776 | 0.008735181 | 0.016314465 |
| APOA1     | 0.137824729  | 0.008738652 | 0.016319415 |
| S100Z     | -0.137810892 | 0.00874547  | 0.016330617 |
| WBP11     | -0.137804237 | 0.00874875  | 0.01633521  |
| ZFP91-CNT | -0.137759242 | 0.00877096  | 0.016375145 |
| PLVAP     | -0.137736471 | 0.008782219 | 0.016394628 |
| RGMB      | -0.137717312 | 0.008791702 | 0.016410792 |
| LRRC41    | -0.13768292  | 0.008808748 | 0.01644107  |



|           |              |             |             |
|-----------|--------------|-------------|-------------|
| TM9SF1    | -0.137675813 | 0.008812274 | 0.016446109 |
| NTM       | -0.137664924 | 0.008817679 | 0.016454655 |
| ARMCX3    | -0.137607851 | 0.008846057 | 0.016504605 |
| UPK1A     | 0.137607757  | 0.008846104 | 0.016504605 |
| RGS19     | 0.137593634  | 0.008853138 | 0.016516182 |
| UBE2G2    | -0.137571286 | 0.00886428  | 0.016535419 |
| TUBB6     | 0.1375479    | 0.008875953 | 0.016555643 |
| GOLGA6L1  | 0.137528918  | 0.008885437 | 0.016571782 |
| C6orf163  | 0.137480763  | 0.008909539 | 0.016615177 |
| IFNG      | 0.137451455  | 0.008924236 | 0.016641026 |
| HEATR1    | -0.13741989  | 0.008940089 | 0.016669027 |
| KMO       | -0.137411689 | 0.008944212 | 0.016675153 |
| GJA4      | -0.137396609 | 0.008951798 | 0.016687733 |
| CCDC108   | 0.137370466  | 0.008964962 | 0.016710709 |
| AGFG2     | 0.137360378  | 0.008970047 | 0.016718622 |
| CYP4X1    | -0.137352851 | 0.008973842 | 0.01672413  |
| CACNA1H   | -0.137338811 | 0.008980925 | 0.016735765 |
| ZNF605    | 0.137312869  | 0.008994025 | 0.016758609 |
| WDR63     | -0.137285268 | 0.009007983 | 0.016783046 |
| SLC29A2   | 0.137282945  | 0.009009158 | 0.016783047 |
| MAGEC2    | 0.137281937  | 0.009009669 | 0.016783047 |
| C19orf33  | 0.137250233  | 0.009025727 | 0.016811387 |
| SV2C      | -0.137240661 | 0.00903058  | 0.016818854 |
| KIAA1310  | -0.137205308 | 0.009048526 | 0.0168507   |
| TSEN15    | 0.137189223  | 0.009056701 | 0.016864348 |
| CDKN2BAS  | 0.137163203  | 0.009069939 | 0.01688742  |
| PHF21A    | -0.137098534 | 0.009102917 | 0.016946634 |
| OXCT1     | -0.137097502 | 0.009103444 | 0.016946634 |
| DDIT4L    | -0.137075189 | 0.009114848 | 0.016966277 |
| CNTROB    | 0.137044939  | 0.009130328 | 0.016993503 |
| CCDC160   | -0.137036832 | 0.009134481 | 0.016999643 |
| LOC285696 | -0.137017832 | 0.00914422  | 0.017015369 |
| MRPL42    | 0.137017013  | 0.00914464  | 0.017015369 |
| MBOAT1    | -0.137010946 | 0.009147752 | 0.01701957  |
| FAM127C   | -0.136986686 | 0.009160204 | 0.017041146 |
| NLRP11    | -0.136976817 | 0.009165275 | 0.017048987 |
| LGI4      | 0.136946811  | 0.009180706 | 0.017076095 |
| AOX1      | -0.136920606 | 0.009194201 | 0.017099599 |
| IFNGR2    | 0.136854852  | 0.00922814  | 0.017161118 |
| CYP20A1   | -0.136848162 | 0.009231599 | 0.017165948 |
| GLRA1     | -0.136833169 | 0.009239357 | 0.017178768 |
| DCLRE1B   | -0.136827076 | 0.00924251  | 0.017183028 |
| PTF1A     | 0.136814294  | 0.00924913  | 0.017192823 |
| IDO2      | -0.136813569 | 0.009249506 | 0.017192823 |
| BARX1     | 0.136796249  | 0.009258483 | 0.017207903 |
| GLG1      | -0.136769827 | 0.009272192 | 0.017231775 |

|           |              |             |             |
|-----------|--------------|-------------|-------------|
| VAPA      | 0.136730569  | 0.009292595 | 0.017268081 |
| LZIC      | 0.136705221  | 0.009305789 | 0.017290319 |
| MOGAT3    | 0.136704243  | 0.009306298 | 0.017290319 |
| FXYD2     | 0.136691148  | 0.009313122 | 0.017301383 |
| GSPT2     | -0.13664777  | 0.009335757 | 0.017341814 |
| FRMD1     | 0.136628494  | 0.00934583  | 0.017358907 |
| NONO      | 0.136590006  | 0.009365973 | 0.017394699 |
| LOC286367 | -0.136586973 | 0.009367562 | 0.017396027 |
| MEG3      | 0.136582964  | 0.009369663 | 0.017398306 |
| RARRES3   | 0.13655589   | 0.009383861 | 0.017422173 |
| FAM78B    | 0.136555117  | 0.009384266 | 0.017422173 |
| DNHD1     | -0.13654347  | 0.00939038  | 0.017431899 |
| LPCAT2    | -0.136538059 | 0.009393221 | 0.017435549 |
| SHISA6    | -0.13653029  | 0.009397303 | 0.017441499 |
| IRAK1BP1  | -0.136439233 | 0.009445254 | 0.017528863 |
| SLC22A15  | -0.136427867 | 0.009451254 | 0.017538365 |
| ZBTB3     | -0.136425516 | 0.009452496 | 0.017539034 |
| C1orf212  | 0.1364007    | 0.009465611 | 0.017561484 |
| PDE1B     | -0.136399287 | 0.009466358 | 0.017561484 |
| ALX3      | -0.136396495 | 0.009467835 | 0.017562587 |
| CALY      | 0.136391148  | 0.009470663 | 0.017566197 |
| SMC1B     | 0.136312027  | 0.009512605 | 0.017642348 |
| EIF2C2    | 0.136254378  | 0.009543269 | 0.017697569 |
| HNRNPR    | -0.136244226 | 0.009548678 | 0.017705952 |
| RBM15     | 0.136234904  | 0.009553647 | 0.017713516 |
| C12orf34  | 0.136223174  | 0.009559903 | 0.017723465 |
| SLC9A3R2  | 0.136183276  | 0.009581209 | 0.017761312 |
| RCOR3     | -0.136170456 | 0.009588064 | 0.017772365 |
| TMEM232   | -0.136148449 | 0.009599841 | 0.01779254  |
| ACOT12    | -0.136131723 | 0.009608801 | 0.017806137 |
| MGC12982  | 0.136131416  | 0.009608966 | 0.017806137 |
| CYB561    | -0.136086988 | 0.009632801 | 0.017848645 |
| PMS2L3    | 0.136042691  | 0.009656619 | 0.017891113 |
| BARHL2    | 0.136034047  | 0.009661273 | 0.01789807  |
| MAOB      | -0.13603082  | 0.009663011 | 0.017899624 |
| DEFA4     | -0.136022421 | 0.009667536 | 0.01790634  |
| ANAPC2    | 0.135993934  | 0.009682895 | 0.017933122 |
| TMEM104   | 0.135979239  | 0.009690827 | 0.017946143 |
| LRRN4     | -0.135975895 | 0.009692633 | 0.017947819 |
| DCAF4L2   | 0.13595937   | 0.009701561 | 0.017962681 |
| SLC45A3   | -0.13594665  | 0.009708438 | 0.017973742 |
| RUNDC3A   | 0.13592499   | 0.009720159 | 0.017993769 |
| TCEB3C    | -0.135895866 | 0.009735939 | 0.018021306 |
| GATA1     | -0.135874253 | 0.009747663 | 0.018041331 |
| CITED1    | 0.135803354  | 0.009786213 | 0.018110997 |
| ATCAY     | 0.135798539  | 0.009788836 | 0.018114168 |

|           |              |             |             |
|-----------|--------------|-------------|-------------|
| LOC152024 | 0.135794492  | 0.009791041 | 0.018116565 |
| PXT1      | -0.135775405 | 0.009801447 | 0.018134134 |
| ART3      | 0.135764748  | 0.009807261 | 0.018143205 |
| C7orf60   | -0.135735401 | 0.009823288 | 0.018171167 |
| LAPTM4A   | -0.13571539  | 0.00983423  | 0.018189717 |
| SFRS8     | 0.135713391  | 0.009835323 | 0.018190051 |
| ZNF439    | -0.135670989 | 0.009858546 | 0.018231307 |
| PPAPDC3   | -0.135665038 | 0.009861809 | 0.018235648 |
| CSRNP3    | -0.135658719 | 0.009865275 | 0.018240364 |
| TNNI3     | 0.135642143  | 0.009874372 | 0.01825413  |
| SAA3P     | 0.135641811  | 0.009874554 | 0.01825413  |
| MEIS1     | -0.135608731 | 0.009892731 | 0.018286035 |
| RFWD3     | -0.135593611 | 0.00990105  | 0.018299713 |
| HOXA2     | -0.135582306 | 0.009907273 | 0.018309516 |
| SPINT3    | -0.135560837 | 0.009919101 | 0.018329675 |
| IGJ       | -0.135554102 | 0.009922815 | 0.018334835 |
| GH2       | 0.135505266  | 0.009949776 | 0.018382947 |
| SNX10     | -0.135495534 | 0.009955157 | 0.018391182 |
| ANKRD2    | 0.135487737  | 0.00995947  | 0.018397443 |
| HOMER3    | 0.135479825  | 0.009963847 | 0.018403823 |
| DDX4      | 0.135459873  | 0.009974895 | 0.018422521 |
| C11orf93  | 0.135434636  | 0.009988885 | 0.018446647 |
| GKAP1     | 0.135428623  | 0.00999222  | 0.018451096 |
| FAM138D   | 0.13539241   | 0.010012331 | 0.018486516 |
| ANXA4     | -0.135380928 | 0.010018715 | 0.018496589 |
| FAM166B   | 0.1353273    | 0.010048579 | 0.018550005 |
| KIAA1683  | -0.135284573 | 0.010072429 | 0.01859231  |
| SPSB1     | -0.135269897 | 0.010080633 | 0.018605728 |
| TST       | 0.135223695  | 0.010106498 | 0.018651739 |
| MAK16     | -0.135197587 | 0.010121141 | 0.018677031 |
| TMEM164   | 0.135151376  | 0.010147103 | 0.018723205 |
| CCDC54    | -0.135135005 | 0.010156314 | 0.018738466 |
| MRI1      | -0.13511154  | 0.010169531 | 0.018761113 |
| FRMPD2    | -0.135101955 | 0.010174934 | 0.018769342 |
| 43901     | 0.135098826  | 0.010176698 | 0.018770857 |
| C9orf50   | 0.135038505  | 0.010210765 | 0.018831948 |
| FAM71F2   | -0.134989336 | 0.010238608 | 0.018881552 |
| HPS3      | 0.134986185  | 0.010240394 | 0.018883097 |
| TMX4      | -0.134954919 | 0.010258137 | 0.018914064 |
| LHFPL4    | 0.134943962  | 0.010264361 | 0.018923787 |
| C7orf49   | 0.134934345  | 0.010269827 | 0.018932112 |
| CPN1      | 0.134924488  | 0.010275432 | 0.018940691 |
| F13A1     | -0.134911499 | 0.010282822 | 0.018951875 |
| VCX2      | 0.134910479  | 0.010283403 | 0.018951875 |
| KIAA0226  | -0.13489975  | 0.010289511 | 0.018961377 |
| DDX11     | 0.134889036  | 0.010295614 | 0.018970868 |

|           |              |             |             |
|-----------|--------------|-------------|-------------|
| NUP155    | -0.134870659 | 0.010306089 | 0.018988413 |
| OPN1LW    | 0.134857847  | 0.010313397 | 0.018998944 |
| KANK3     | -0.134857294 | 0.010313713 | 0.018998944 |
| CTPS      | -0.134850681 | 0.010317487 | 0.019004139 |
| MYOZ3     | -0.134824686 | 0.010332335 | 0.019029728 |
| TCHP      | -0.13481176  | 0.010339725 | 0.019041578 |
| CLLU1     | -0.134721597 | 0.010391405 | 0.019134982 |
| HEPN1     | -0.134694455 | 0.010407007 | 0.01916194  |
| C17orf55  | 0.134674388  | 0.010418555 | 0.01918143  |
| SYNPO2L   | -0.134668471 | 0.010421963 | 0.019185929 |
| ACLY      | -0.134665371 | 0.010423748 | 0.019187443 |
| RAD54B    | 0.134645308  | 0.010435311 | 0.019206951 |
| TMEM201   | 0.134608461  | 0.010456576 | 0.019244313 |
| SLC39A12  | -0.13451708  | 0.010509479 | 0.019339889 |
| C17orf70  | 0.134499284  | 0.01051981  | 0.019357111 |
| MBL1P     | -0.134492073 | 0.010523998 | 0.019363028 |
| C17orf96  | 0.134458686  | 0.010543409 | 0.019396951 |
| JAKMIP3   | -0.134445031 | 0.010551358 | 0.019409781 |
| CLECL1    | 0.13442413   | 0.010563534 | 0.019430385 |
| NKX2-5    | 0.134404907  | 0.010574744 | 0.019449208 |
| DYNC2LI1  | 0.134391651  | 0.01058248  | 0.019461639 |
| LIN28A    | 0.134389389  | 0.010583801 | 0.019462271 |
| EIF3IP1   | 0.134372943  | 0.010593407 | 0.019478136 |
| AGR2      | 0.134336978  | 0.010614441 | 0.01951501  |
| MTL5      | 0.134330687  | 0.010618124 | 0.019519979 |
| LOC143666 | 0.134318969  | 0.010624987 | 0.019530779 |
| LOC653113 | 0.134317308  | 0.01062596  | 0.019530779 |
| FBXO39    | -0.134293648 | 0.010639831 | 0.01955447  |
| C1orf127  | 0.134285455  | 0.010644638 | 0.019561499 |
| CLCN1     | -0.134280511 | 0.01064754  | 0.019565026 |
| TUB       | -0.134273176 | 0.010651846 | 0.019571133 |
| PIK3R2    | 0.134255917  | 0.010661984 | 0.019587953 |
| EPB49     | -0.134235551 | 0.010673959 | 0.019608144 |
| SCG2      | -0.134137695 | 0.010731661 | 0.019711787 |
| KIRREL2   | 0.134136517  | 0.010732358 | 0.019711787 |
| MSLNL     | 0.134112398  | 0.010746623 | 0.019734791 |
| SCAMP5    | 0.13411199   | 0.010746865 | 0.019734791 |
| FAM22G    | 0.134099953  | 0.010753991 | 0.01974532  |
| C10orf88  | 0.134098955  | 0.010754582 | 0.01974532  |
| GLOD4     | -0.134071912 | 0.010770607 | 0.019772919 |
| RCL1      | -0.134044328 | 0.010786975 | 0.019801143 |
| HSD17B6   | -0.134037524 | 0.010791015 | 0.019806734 |
| C21orf82  | -0.134022382 | 0.010800012 | 0.019821421 |
| LOC100134 | 0.134019208  | 0.010801899 | 0.019823057 |
| PTCD3     | -0.134008781 | 0.010808099 | 0.019832608 |
| NLGN1     | -0.13399268  | 0.01081768  | 0.01984836  |

|           |              |             |             |
|-----------|--------------|-------------|-------------|
| OR7C1     | 0.133983831  | 0.010822949 | 0.019856198 |
| ZBTB45    | 0.133944831  | 0.010846196 | 0.019895893 |
| KLF5      | -0.133944182 | 0.010846584 | 0.019895893 |
| DGCR8     | -0.133913327 | 0.010865008 | 0.019926726 |
| FAM22A    | 0.133912681  | 0.010865394 | 0.019926726 |
| SPINK9    | 0.133910693  | 0.010866582 | 0.019927071 |
| LY6G6D    | 0.133900341  | 0.01087277  | 0.019936582 |
| ZNF826    | 0.133884593  | 0.010882191 | 0.019952019 |
| CD1E      | -0.133878587 | 0.010885785 | 0.019955786 |
| CEP68     | -0.133877812 | 0.010886249 | 0.019955786 |
| PBXIP1    | 0.133825109  | 0.010917838 | 0.020011445 |
| KHDC1     | 0.133823803  | 0.010918622 | 0.020011445 |
| ZNF302    | -0.133819627 | 0.010921128 | 0.020014196 |
| BDKRB1    | -0.133788009 | 0.010940123 | 0.020047162 |
| TRIM63    | -0.133758925 | 0.010957622 | 0.02007738  |
| MAPK13    | 0.133729325  | 0.010975456 | 0.020108207 |
| ZNF416    | 0.133701855  | 0.01099203  | 0.02013672  |
| PRR4      | 0.133660085  | 0.011017275 | 0.02018111  |
| S100A7    | 0.133656104  | 0.011019684 | 0.020183666 |
| TMEM151B  | -0.133645735 | 0.011025959 | 0.020193303 |
| LGALS14   | 0.133606662  | 0.011049637 | 0.020233829 |
| DPEP3     | 0.133605866  | 0.011050119 | 0.020233829 |
| GAGE13    | 0.133594859  | 0.011056798 | 0.020244196 |
| FAM171A1  | -0.133591196 | 0.011059021 | 0.020246406 |
| PRSS8     | -0.13357275  | 0.011070223 | 0.020264204 |
| CLNK      | -0.133571836 | 0.011070778 | 0.020264204 |
| ZNF239    | 0.133543032  | 0.011088291 | 0.020294396 |
| GCET2     | -0.133519836 | 0.011102413 | 0.020318374 |
| EML3      | -0.13351735  | 0.011103927 | 0.020319278 |
| FBP1      | -0.133494288 | 0.011117984 | 0.020343131 |
| SOX10     | -0.133491597 | 0.011119625 | 0.020344266 |
| MRAP      | -0.13346453  | 0.011136145 | 0.020372619 |
| FABP3     | 0.133461458  | 0.011138022 | 0.02037418  |
| DMRTA2    | 0.133457976  | 0.011140148 | 0.020376199 |
| OR6B1     | 0.133453198  | 0.011143068 | 0.020379421 |
| POM121L1P | -0.133451744 | 0.011143956 | 0.020379421 |
| PAQR4     | 0.133437944  | 0.011152393 | 0.020392977 |
| CLN5      | -0.133425734 | 0.011159862 | 0.020404761 |
| PCDH11X   | -0.13331394  | 0.011228454 | 0.02052829  |
| TTY9B     | 0.13329914   | 0.011237563 | 0.020543058 |
| TCEAL6    | -0.13321924  | 0.01128685  | 0.020630207 |
| AWAT1     | 0.1332185    | 0.011287308 | 0.020630207 |
| TM4SF19   | 0.13317413   | 0.011314762 | 0.020678487 |
| ATG3      | 0.13316112   | 0.011322822 | 0.02069132  |
| GTPBP4    | 0.133144531  | 0.011333108 | 0.020708217 |
| AKD1      | -0.133135365 | 0.011338795 | 0.020716707 |

|           |              |             |             |
|-----------|--------------|-------------|-------------|
| C10orf75  | 0.13310703   | 0.011356391 | 0.020746006 |
| SNORA72   | 0.133106187  | 0.011356915 | 0.020746006 |
| TP53I13   | 0.133095041  | 0.011363843 | 0.020756758 |
| BAALC     | -0.133090512 | 0.01136666  | 0.020759999 |
| CLCN5     | -0.133075247 | 0.011376156 | 0.020775438 |
| ST6GALNAC | -0.133064946 | 0.011382569 | 0.020785243 |
| SCUBE2    | -0.133047754 | 0.011393279 | 0.020802893 |
| IRX4      | 0.133041463  | 0.0113972   | 0.020808145 |
| SELT      | -0.132994423 | 0.011426558 | 0.020858192 |
| ZNF273    | -0.132994184 | 0.011426707 | 0.020858192 |
| TRIM37    | -0.132892468 | 0.011490418 | 0.020972567 |
| LOC100127 | 0.132884802  | 0.011495232 | 0.020979431 |
| PNPLA1    | 0.132878361  | 0.011499278 | 0.020984892 |
| ABCG1     | -0.132847332 | 0.01151879  | 0.021018572 |
| FBXL20    | -0.132805781 | 0.011544962 | 0.0210644   |
| LOC286467 | 0.132793667  | 0.011552603 | 0.02107641  |
| PKDREJ    | -0.132736247 | 0.011588879 | 0.021140655 |
| C14orf139 | -0.132724279 | 0.011596453 | 0.021152534 |
| HIST1H2BI | 0.132708935  | 0.01160617  | 0.021168319 |
| UGT2B10   | -0.132647546 | 0.011645117 | 0.021237408 |
| LOC146880 | 0.13263911   | 0.011650478 | 0.02124524  |
| OCM       | 0.132590643  | 0.01168132  | 0.021299532 |
| KIAA1543  | 0.132584335  | 0.01168534  | 0.021304911 |
| AP3S1     | 0.13257732   | 0.011689811 | 0.021311112 |
| GSTA1     | 0.132554755  | 0.011704204 | 0.021335398 |
| PORCN     | -0.132548613 | 0.011708125 | 0.021340592 |
| MOBKL2A   | 0.132531304  | 0.01171918  | 0.021358787 |
| DTWD1     | 0.132494495  | 0.011742718 | 0.021399729 |
| ZNF167    | -0.132476825 | 0.011754034 | 0.02141839  |
| ZMYND12   | -0.132443142 | 0.011775628 | 0.021455777 |
| CLTC      | -0.132403816 | 0.011800886 | 0.021499831 |
| UBA7      | -0.132401989 | 0.01180206  | 0.021500003 |
| RTTN      | -0.132383982 | 0.011813642 | 0.021519134 |
| HSD11B2   | 0.132374702  | 0.011819616 | 0.021528045 |
| SLC22A11  | 0.132361468  | 0.011828137 | 0.021541596 |
| SNORA9    | 0.132358109  | 0.011830301 | 0.021543567 |
| SLC5A8    | -0.132346714 | 0.011837645 | 0.021554969 |
| RAB25     | -0.132327967 | 0.011849736 | 0.021575013 |
| CUEDC1    | -0.1323219   | 0.01185365  | 0.021580167 |
| C8orf56   | 0.132305957  | 0.011863944 | 0.021596933 |
| NHEG1     | 0.132297539  | 0.011869382 | 0.02160427  |
| CADM4     | -0.13229636  | 0.011870144 | 0.02160427  |
| KCTD16    | -0.132269294 | 0.011887646 | 0.021634146 |
| FGF3      | 0.132231654  | 0.011912022 | 0.021676528 |
| PPWD1     | -0.132227797 | 0.011914522 | 0.021679097 |
| LOC220594 | -0.132221646 | 0.011918511 | 0.021684373 |

|           |              |             |             |
|-----------|--------------|-------------|-------------|
| OR7E37P   | 0.13221513   | 0.011922737 | 0.021690081 |
| ZNF749    | -0.132207944 | 0.0119274   | 0.021696581 |
| C1orf204  | -0.132177438 | 0.011947211 | 0.021730634 |
| SLFNL1    | -0.132158658 | 0.011959422 | 0.021750857 |
| CSF3      | -0.132154403 | 0.011962189 | 0.021753904 |
| KIAA0146  | 0.132117408  | 0.011986281 | 0.021795725 |
| FKSG29    | -0.132085551 | 0.01200706  | 0.021831517 |
| ZFP36L2   | -0.132076016 | 0.012013286 | 0.021840842 |
| ALPI      | 0.132068929  | 0.012017915 | 0.021847263 |
| C12orf32  | 0.132065261  | 0.012020311 | 0.021849626 |
| CMAH      | -0.131998205 | 0.012064196 | 0.021927395 |
| ANO5      | -0.131979012 | 0.012076784 | 0.02194827  |
| CAMP      | -0.131974891 | 0.012079487 | 0.021951181 |
| TMEM159   | -0.131960627 | 0.012088852 | 0.021966194 |
| SHISA7    | -0.131940523 | 0.01210206  | 0.021988187 |
| PARD3     | 0.131933495  | 0.012106681 | 0.021994576 |
| SLCO6A1   | 0.131913104  | 0.012120095 | 0.022016938 |
| MRPS31    | 0.131905765  | 0.012124927 | 0.022023706 |
| DAO       | -0.13190071  | 0.012128255 | 0.022027744 |
| MAGEA2    | 0.131854317  | 0.012158843 | 0.022081283 |
| PLOD3     | 0.131842476  | 0.012166661 | 0.022093467 |
| HAGHL     | 0.131819858  | 0.012181606 | 0.022116825 |
| C2orf42   | -0.131819648 | 0.012181745 | 0.022116825 |
| ASMT      | 0.131803351  | 0.012192524 | 0.022134377 |
| CTNNA3    | -0.131796457 | 0.012197086 | 0.022138936 |
| TCF25     | 0.131796196  | 0.012197259 | 0.022138936 |
| OMA1      | -0.131791101 | 0.012200632 | 0.02214304  |
| NFATC3    | -0.131775828 | 0.012210747 | 0.022159378 |
| HCN3      | 0.131749392  | 0.012228272 | 0.022189161 |
| HSPA2     | -0.131742512 | 0.012232838 | 0.022195423 |
| ZBTB12    | 0.131717086  | 0.01224972  | 0.02222403  |
| LOC148145 | -0.1317068   | 0.012256556 | 0.022234406 |
| FSTL3     | -0.131701796 | 0.012259882 | 0.022238415 |
| TTYH3     | -0.131696445 | 0.012263441 | 0.022242844 |
| GPRIN2    | -0.131694401 | 0.0122648   | 0.022243283 |
| PFAS      | -0.131661244 | 0.012286871 | 0.022281282 |
| TRA2A     | -0.13164749  | 0.012296037 | 0.022295873 |
| SLC25A45  | 0.131645625  | 0.01229728  | 0.022296097 |
| PIP5K1P1  | -0.131643862 | 0.012298455 | 0.022296198 |
| RPP25     | 0.131635419  | 0.012304086 | 0.022304375 |
| SLC12A9   | 0.131607058  | 0.012323015 | 0.022336657 |
| MALAT1    | -0.131598987 | 0.012328407 | 0.022344396 |
| SH3BP2    | -0.131577797 | 0.012342573 | 0.022368035 |
| SLC2A2    | -0.131573634 | 0.012345357 | 0.022371045 |
| POLQ      | 0.131540318  | 0.012367663 | 0.022409426 |
| C9orf46   | 0.131523392  | 0.012379008 | 0.022427943 |

|          |              |             |             |
|----------|--------------|-------------|-------------|
| ZNF746   | -0.13152121  | 0.012380471 | 0.022428554 |
| CIDEB    | -0.131517564 | 0.012382917 | 0.022430943 |
| RAGE     | 0.131513809  | 0.012385436 | 0.022433466 |
| PIGB     | -0.131487581 | 0.012403043 | 0.022463315 |
| TCAP     | 0.131455252  | 0.012424776 | 0.022500629 |
| OSGIN1   | 0.131439015  | 0.012435704 | 0.022518371 |
| IL10     | -0.131413387 | 0.01245297  | 0.022547586 |
| KIF5C    | -0.131396073 | 0.012464646 | 0.022566676 |
| PCDHB9   | -0.131368558 | 0.012483222 | 0.022598252 |
| SFTPD    | -0.131353491 | 0.012493404 | 0.022614629 |
| ODZ1     | -0.131346031 | 0.012498448 | 0.022621703 |
| MB       | -0.131323649 | 0.012513593 | 0.022647056 |
| LIAS     | 0.131320292  | 0.012515866 | 0.022649111 |
| YTHDF1   | 0.131311213  | 0.012522015 | 0.022657085 |
| SLC34A3  | 0.131310427  | 0.012522548 | 0.022657085 |
| ZNF833   | -0.131252169 | 0.012562068 | 0.022726525 |
| PIGP     | 0.131248336  | 0.012564672 | 0.022729172 |
| ITGAD    | -0.13124511  | 0.012566864 | 0.022731072 |
| SLC35A4  | 0.131235715  | 0.01257325  | 0.022740557 |
| SIDT1    | -0.131233524 | 0.01257474  | 0.022741187 |
| ZNF318   | -0.131183029 | 0.012609114 | 0.02279949  |
| PROCR    | -0.131182802 | 0.012609268 | 0.02279949  |
| RTN2     | 0.131168414  | 0.012619078 | 0.022815155 |
| PITPNC1  | 0.131114149  | 0.012656137 | 0.022880081 |
| ZIC5     | 0.131102573  | 0.012664055 | 0.022892317 |
| CWH43    | -0.131074617 | 0.012683195 | 0.022924834 |
| ZDHHC7   | -0.131064091 | 0.012690407 | 0.022935789 |
| PNPLA5   | -0.131039056 | 0.012707578 | 0.022964738 |
| MIS12    | -0.131033221 | 0.012711583 | 0.022969891 |
| REXO1L1  | 0.130994328  | 0.012738305 | 0.02301609  |
| MTHFD2   | -0.130932179 | 0.012781108 | 0.023091334 |
| VAX2     | 0.130858418  | 0.012832075 | 0.023181311 |
| CCDC144C | -0.130832606 | 0.012849952 | 0.0232115   |
| WWP1     | -0.130803326 | 0.012870258 | 0.023246071 |
| HNRPLL   | -0.130789747 | 0.012879684 | 0.023260988 |
| SMPDL3A  | -0.13074216  | 0.012912768 | 0.023318623 |
| ZNF48    | 0.130717322  | 0.012930065 | 0.023347427 |
| LSAMP    | -0.13071589  | 0.012931063 | 0.023347427 |
| AMAC1L3  | -0.130691109 | 0.012948343 | 0.023376507 |
| MSI2     | -0.130684706 | 0.01295281  | 0.023382453 |
| DCAF12L1 | 0.130675061  | 0.012959544 | 0.023392487 |
| WNT3A    | 0.130638996  | 0.012984746 | 0.023435855 |
| ZNF365   | -0.13061022  | 0.013004887 | 0.023470079 |
| KPNA7    | 0.130557307  | 0.013041993 | 0.023534912 |
| HMOX2    | 0.130532629  | 0.01305933  | 0.023564062 |
| SLC25A42 | -0.130522724 | 0.013066295 | 0.023574493 |



|         |              |             |             |
|---------|--------------|-------------|-------------|
| CKM     | 0.130454199  | 0.013114566 | 0.023659248 |
| NLRC4   | -0.130452668 | 0.013115646 | 0.023659248 |
| GHITM   | -0.130429697 | 0.013131864 | 0.023686358 |
| ZNF738  | 0.130402926  | 0.013150787 | 0.023718341 |
| JRK     | 0.130393374  | 0.013157545 | 0.02372838  |
| SCLY    | 0.130352226  | 0.01318669  | 0.023778787 |
| TMEM50A | 0.130347669  | 0.013189921 | 0.023782461 |
| CSAG1   | 0.130340212  | 0.01319521  | 0.023789843 |
| WDR8    | 0.130326078  | 0.01320524  | 0.023805771 |
| ARL17B  | -0.130317356 | 0.013211433 | 0.023813103 |
| ARL1    | -0.130316982 | 0.013211698 | 0.023813103 |
| SPANXC  | 0.130311824  | 0.013215362 | 0.02381755  |
| TBX15   | -0.130294712 | 0.013227522 | 0.023837309 |
| CXCL6   | -0.130291369 | 0.013229899 | 0.023839435 |
| ZNF841  | -0.130287921 | 0.013232351 | 0.023840079 |
| CCDC67  | 0.1302875    | 0.01323265  | 0.023840079 |
| GPR149  | -0.130283877 | 0.013235227 | 0.023842565 |
| DCXR    | 0.130267582  | 0.013246822 | 0.023861294 |
| XRCC5   | 0.130239225  | 0.013267021 | 0.023895517 |
| RHD     | -0.130192474 | 0.013300382 | 0.023953437 |
| CALML6  | 0.130162741  | 0.013321637 | 0.023989547 |
| GPC4    | -0.130142485 | 0.013336135 | 0.024013484 |
| IL1F7   | 0.130133201  | 0.013342784 | 0.024023284 |
| TMEM37  | 0.130125552  | 0.013348265 | 0.024030979 |
| ARAP1   | 0.130111434  | 0.013358386 | 0.024047026 |
| ZSCAN20 | -0.130100776 | 0.013366031 | 0.024058614 |
| AMBN    | 0.130087427  | 0.013375612 | 0.024073683 |
| PSTPIP1 | 0.13005477   | 0.013399075 | 0.024112283 |
| ATP2B3  | -0.130054207 | 0.013399479 | 0.024112283 |
| BAGE    | 0.130048241  | 0.01340377  | 0.024117825 |
| DHRS4L1 | 0.130009215  | 0.013431865 | 0.024166194 |
| CD248   | -0.12996272  | 0.013465406 | 0.02422435  |
| GATC    | -0.129958947 | 0.013468131 | 0.024227064 |
| EMR2    | -0.129939791 | 0.013481974 | 0.024249775 |
| DNAH9   | -0.129929677 | 0.013489287 | 0.024260739 |
| C7orf64 | -0.129914699 | 0.013500124 | 0.024278036 |
| C5orf28 | -0.129908066 | 0.013504926 | 0.024284479 |
| DHRS7C  | -0.129878729 | 0.013526182 | 0.024320504 |
| IGHMBP2 | -0.129842125 | 0.013552744 | 0.024366065 |
| BPHL    | 0.129823038  | 0.013566613 | 0.024388797 |
| ABHD14B | 0.12981834   | 0.013570028 | 0.024392735 |
| CDK9    | 0.129810121  | 0.013576006 | 0.024401278 |
| SEC61A2 | -0.129806291 | 0.013578792 | 0.024404082 |
| ZNF705A | -0.129721396 | 0.013640678 | 0.024513093 |
| SNORA10 | 0.129718587  | 0.01364273  | 0.024514569 |
| ZNF480  | 0.129674891  | 0.013674683 | 0.024569769 |

|            |              |             |             |
|------------|--------------|-------------|-------------|
| RTBDN      | 0.129665841  | 0.01368131  | 0.024579458 |
| CPT1B      | 0.129663237  | 0.013683217 | 0.024580667 |
| NLRX1      | -0.129641228 | 0.013699346 | 0.02460742  |
| TRPV2      | 0.129638476  | 0.013701364 | 0.024608825 |
| BBOX1      | -0.129631795 | 0.013706263 | 0.024615406 |
| MANSC1     | -0.129625167 | 0.013711126 | 0.024621918 |
| DKFZp779M  | 0.129604882  | 0.013726017 | 0.024646437 |
| C1orf194   | 0.12955687   | 0.013761319 | 0.024707598 |
| IL20RB     | 0.12955059   | 0.013765942 | 0.02471367  |
| HSDL1      | 0.129511553  | 0.013794713 | 0.02476309  |
| SERPINB2   | -0.129507752 | 0.013797517 | 0.024764325 |
| C4orf7     | 0.129507249  | 0.013797888 | 0.024764325 |
| KCNC1      | 0.129502294  | 0.013801545 | 0.024768655 |
| ARHGEF37   | -0.12948187  | 0.013816625 | 0.024793484 |
| SORCS3     | 0.129473867  | 0.013822538 | 0.02480186  |
| C8orf22    | 0.129456438  | 0.013835423 | 0.024822744 |
| PPP1R12C   | 0.129444322  | 0.013844387 | 0.024836588 |
| OR2A14     | -0.129435174 | 0.013851158 | 0.024846496 |
| PCDHB2     | -0.129432904 | 0.013852838 | 0.024847273 |
| ETV1       | -0.129397043 | 0.013879413 | 0.024892697 |
| FAM182B    | 0.129386877  | 0.013886955 | 0.02490398  |
| ELFN2      | -0.129364048 | 0.013903903 | 0.024932129 |
| NUP50      | -0.129354513 | 0.013910987 | 0.024942587 |
| CSNK2A2    | 0.129337413  | 0.0139237   | 0.024963133 |
| GPR156     | -0.129328468 | 0.013930354 | 0.024972167 |
| GALNT12    | -0.129327269 | 0.013931247 | 0.024972167 |
| ANKRD32    | -0.129315747 | 0.013939822 | 0.02498529  |
| OR6C2      | 0.129313279  | 0.01394166  | 0.024985872 |
| DISP2      | -0.129311941 | 0.013942656 | 0.024985872 |
| GNGT2      | 0.129292537  | 0.013957111 | 0.025009526 |
| C1orf229   | 0.129289332  | 0.0139595   | 0.025011556 |
| HSF4       | 0.129223456  | 0.014008682 | 0.025097418 |
| SLC6A20    | -0.129171471 | 0.0140476   | 0.025164879 |
| ACTRT1     | 0.129153334  | 0.0140612   | 0.025186976 |
| C14orf166B | 0.129130297  | 0.014078492 | 0.025215682 |
| TP53I3     | 0.129128126  | 0.014080123 | 0.025216335 |
| GRM4       | 0.129111028  | 0.01409297  | 0.025237073 |
| BANK1      | -0.129073874 | 0.014120922 | 0.025284856 |
| SLC37A1    | -0.129068513 | 0.014124959 | 0.02528981  |
| ZSCAN4     | -0.129054324 | 0.01413565  | 0.025306676 |
| FAM84B     | -0.129030826 | 0.014153369 | 0.025336121 |
| SLCO1B1    | -0.129005109 | 0.014172785 | 0.025368597 |
| F13B       | -0.128951699 | 0.014213183 | 0.025438621 |
| C3orf15    | -0.128895614 | 0.014255713 | 0.025512448 |
| LOC168474  | -0.128883391 | 0.014264996 | 0.025526767 |
| SGK223     | -0.128847532 | 0.014292263 | 0.025573263 |

|           |              |             |             |
|-----------|--------------|-------------|-------------|
| LRRC20    | 0.128842348  | 0.014296208 | 0.025577487 |
| LRRC36    | 0.128841056  | 0.014297192 | 0.025577487 |
| TAAR1     | -0.128834379 | 0.014302275 | 0.025584282 |
| GPR25     | -0.128822636 | 0.01431122  | 0.025597983 |
| NXT2      | -0.128742599 | 0.014372314 | 0.025704952 |
| SLC7A8    | -0.128723548 | 0.014386891 | 0.025728711 |
| PSG3      | -0.128714545 | 0.014393783 | 0.025738726 |
| LASP1     | 0.128690147  | 0.014412476 | 0.025769839 |
| IHH       | 0.128688117  | 0.014414033 | 0.025770309 |
| JAKMIP2   | -0.128684169 | 0.01441706  | 0.025773407 |
| PRNP      | -0.128677699 | 0.014422023 | 0.025779965 |
| PROKR1    | -0.128622231 | 0.014464626 | 0.025853799 |
| USP17L2   | -0.128619114 | 0.014467024 | 0.025855764 |
| PPP6C     | -0.128611174 | 0.014473132 | 0.025864359 |
| GEMIN5    | -0.128599613 | 0.01448203  | 0.025877939 |
| BBS4      | -0.128507424 | 0.014553158 | 0.026002703 |
| KLHL31    | 0.128504364  | 0.014555524 | 0.026004599 |
| TMEM110   | 0.128480381  | 0.01457408  | 0.026035416 |
| C1orf125  | 0.128461622  | 0.01458861  | 0.026059033 |
| PDE9A     | 0.128416197  | 0.014623845 | 0.026118908 |
| TMEM134   | 0.128415028  | 0.014624753 | 0.026118908 |
| MAPKAPK3  | 0.128402911  | 0.014634164 | 0.026133374 |
| ERBB4     | -0.128338375 | 0.014684383 | 0.026220702 |
| LCE2D     | 0.128334202  | 0.014687636 | 0.026224159 |
| LOH12CR1  | 0.128318074  | 0.014700212 | 0.02624426  |
| M6PR      | -0.128304268 | 0.014710985 | 0.026261139 |
| PLIN1     | -0.128297727 | 0.014716091 | 0.026267899 |
| ETV5      | 0.128252604  | 0.01475136  | 0.026328493 |
| NPLOC4    | 0.128241262  | 0.014760237 | 0.026341977 |
| SERPINA9  | 0.128235317  | 0.014764892 | 0.02634602  |
| PTEN      | -0.128234989 | 0.014765149 | 0.02634602  |
| PLCD4     | 0.12820708   | 0.014787017 | 0.026382677 |
| WFDC1     | -0.128192769 | 0.014798243 | 0.026400341 |
| ACVR2B    | 0.12816905   | 0.014816863 | 0.026431192 |
| ARL4C     | -0.128124394 | 0.014851976 | 0.026491456 |
| NEUROG1   | 0.128108822  | 0.014864238 | 0.026509562 |
| FLJ36000  | 0.128108121  | 0.014864789 | 0.026509562 |
| HIST1H1D  | 0.128055256  | 0.014906484 | 0.026581538 |
| SLC9A3    | -0.128041419 | 0.014917414 | 0.026598647 |
| LOC100132 | 0.128009672  | 0.014942517 | 0.02663928  |
| C7orf70   | 0.128009218  | 0.014942877 | 0.02663928  |
| HAND1     | 0.127991869  | 0.014956611 | 0.026661378 |
| FBXL7     | -0.127979318 | 0.014966555 | 0.026676715 |
| DNAJC6    | -0.127973533 | 0.014971139 | 0.026682499 |
| CDCP2     | -0.127961645 | 0.014980565 | 0.026696908 |
| GRID2     | 0.12793267   | 0.015003561 | 0.026735496 |

|           |              |             |             |
|-----------|--------------|-------------|-------------|
| DEF6      | 0.127902959  | 0.015027172 | 0.026775175 |
| VPS4A     | 0.127900378  | 0.015029225 | 0.026776437 |
| TBC1D10B  | 0.127887461  | 0.015039501 | 0.026792349 |
| WDR90     | -0.127880801 | 0.015044803 | 0.026799396 |
| DTD1      | 0.127871858  | 0.015051923 | 0.026809682 |
| SYAP1     | -0.127837182 | 0.015079562 | 0.026856508 |
| CYTIP     | -0.127814589 | 0.015097593 | 0.026886217 |
| DPCR1     | -0.127782051 | 0.015123595 | 0.026930115 |
| JOSD1     | -0.127779509 | 0.015125629 | 0.026931327 |
| SLC9A9    | -0.127777004 | 0.015127632 | 0.026932487 |
| MORN1     | 0.127740305  | 0.015157013 | 0.026982383 |
| CHAC2     | -0.127710573 | 0.015180853 | 0.027022407 |
| PDCL2     | 0.127701358  | 0.01518825  | 0.027033157 |
| SNORA21   | 0.127690413  | 0.015197037 | 0.027046381 |
| NAA25     | -0.127687681 | 0.015199232 | 0.027047869 |
| MSR1      | -0.12768256  | 0.015203346 | 0.027052772 |
| CCDC43    | 0.127676855  | 0.01520793  | 0.027057962 |
| AOC2      | -0.127675549 | 0.015208979 | 0.027057962 |
| LRRN1     | -0.127664208 | 0.015218096 | 0.027071763 |
| NRG3      | -0.127613328 | 0.015259058 | 0.027139824 |
| RAB11A    | 0.127613299  | 0.015259081 | 0.027139824 |
| C6orf218  | 0.1275579    | 0.015303791 | 0.027216914 |
| PLA2G15   | 0.127532389  | 0.015324418 | 0.027251164 |
| LOC100188 | 0.127508851  | 0.015343472 | 0.027282611 |
| NCRNA0010 | 0.127496024  | 0.015353864 | 0.027298651 |
| TCEAL2    | 0.127483884  | 0.015363705 | 0.02731371  |
| AURKAPS1  | 0.127436164  | 0.015402441 | 0.027380132 |
| GLT6D1    | 0.12741305   | 0.015421234 | 0.027411093 |
| ATG12     | 0.127410014  | 0.015423705 | 0.027413037 |
| ATP6V1G3  | 0.127402028  | 0.015430203 | 0.02742214  |
| STOM      | -0.127372231 | 0.015454473 | 0.027462821 |
| ZC3HAV1   | -0.127366354 | 0.015459264 | 0.027468882 |
| XAGE5     | 0.127349468  | 0.015473036 | 0.027490901 |
| DNAH14    | 0.127343043  | 0.015478279 | 0.027497763 |
| MORC2     | 0.127340338  | 0.015480486 | 0.027499232 |
| GTF2H2B   | 0.127329843  | 0.015489055 | 0.027511999 |
| MAPK12    | 0.127310993  | 0.015504456 | 0.027536898 |
| CLPTM1L   | 0.127290475  | 0.015521234 | 0.027563664 |
| ACSL6     | -0.127289179 | 0.015522295 | 0.027563664 |
| ABCC3     | -0.127280255 | 0.015529597 | 0.027574174 |
| CHST4     | -0.127273216 | 0.01553536  | 0.027581947 |
| GNAI1     | -0.127254161 | 0.015550969 | 0.027607198 |
| KRTAP10-3 | -0.127218722 | 0.015580036 | 0.027656334 |
| UBE2E3    | 0.127212732  | 0.015584953 | 0.027662597 |
| PDE6B     | 0.127188442  | 0.015604909 | 0.027695549 |
| TBL1X     | -0.127178802 | 0.015612835 | 0.027707147 |

|           |              |             |             |
|-----------|--------------|-------------|-------------|
| RAB3A     | -0.12717187  | 0.015618536 | 0.027714795 |
| MARK4     | 0.127165969  | 0.015623391 | 0.027720939 |
| USP1      | -0.127127189 | 0.015655329 | 0.027775135 |
| DRAM2     | 0.127107703  | 0.0156714   | 0.02780117  |
| CT47A2    | 0.127101965  | 0.015676135 | 0.027807092 |
| TCEB3B    | -0.127093359 | 0.015683238 | 0.027817215 |
| PRSS22    | -0.127087945 | 0.015687709 | 0.027822667 |
| TCP11L1   | -0.127004897 | 0.015756423 | 0.027942045 |
| FAM84A    | -0.126999339 | 0.015761031 | 0.027947728 |
| LOC284551 | 0.126971359  | 0.015784247 | 0.027986404 |
| PLEKHH3   | -0.12696531  | 0.01578927  | 0.027992818 |
| LSG1      | -0.126946623 | 0.015804796 | 0.028017849 |
| KCNU1     | 0.12691417   | 0.015831792 | 0.028063207 |
| UCN3      | 0.126906966  | 0.01583779  | 0.028071341 |
| C6orf97   | -0.126874178 | 0.015865115 | 0.02811727  |
| INSM1     | 0.126846673  | 0.015888068 | 0.028154574 |
| SLC39A10  | -0.126845568 | 0.015888991 | 0.028154574 |
| ZFAND1    | 0.126829338  | 0.01590255  | 0.028176092 |
| MLL4      | -0.126798938 | 0.015927973 | 0.028218627 |
| TPK1      | -0.126758055 | 0.015962219 | 0.028276784 |
| SCTR      | -0.126752556 | 0.015966831 | 0.028281064 |
| CGB7      | -0.126751787 | 0.015967476 | 0.028281064 |
| NARS2     | -0.126663551 | 0.01604163  | 0.02840947  |
| CAPZA2    | -0.12666213  | 0.016042827 | 0.02840947  |
| SSX1      | 0.126637988  | 0.01606317  | 0.028442965 |
| TRPM6     | 0.126635003  | 0.016065686 | 0.028444892 |
| ABL2      | -0.126621797 | 0.016076826 | 0.028462084 |
| GPR135    | -0.126599714 | 0.016095467 | 0.028492553 |
| ING1      | -0.126593404 | 0.016100797 | 0.028499456 |
| MOCS1     | 0.126583697  | 0.016109    | 0.028511441 |
| KCNQ1     | -0.12651101  | 0.016170538 | 0.028617815 |
| HOXA11    | 0.126501296  | 0.016178778 | 0.028629853 |
| CIDEA     | -0.1264992   | 0.016180556 | 0.028630455 |
| GPR35     | 0.126478847  | 0.016197833 | 0.02865848  |
| RTCD1     | 0.126468223  | 0.016206858 | 0.028671901 |
| RBM15B    | 0.126463174  | 0.016211149 | 0.028676944 |
| CD80      | -0.126449143 | 0.016223078 | 0.028695124 |
| DHRS7B    | 0.126447696  | 0.016224308 | 0.028695124 |
| SPTA1     | -0.126439308 | 0.016231444 | 0.028705195 |
| PITPNB    | -0.126430555 | 0.016238893 | 0.028715818 |
| LOC154761 | -0.126378973 | 0.01628285  | 0.028790993 |
| HBE1      | 0.126372995  | 0.016287951 | 0.028797455 |
| MPZ       | 0.126356681  | 0.016301879 | 0.028819522 |
| KCNV1     | 0.126264811  | 0.016380507 | 0.028955955 |
| UGDH      | 0.126232429  | 0.0164083   | 0.029002512 |
| GRM6      | -0.126228454 | 0.016411714 | 0.029005972 |

|           |              |             |             |
|-----------|--------------|-------------|-------------|
| PLXNB3    | -0.126217833 | 0.016420841 | 0.029019527 |
| CCL2      | -0.126182704 | 0.016451059 | 0.029070349 |
| INPP5A    | 0.126173596  | 0.016458901 | 0.029081627 |
| MS4A2     | -0.126140147 | 0.016487732 | 0.029129598 |
| TGM5      | -0.126138704 | 0.016488976 | 0.029129598 |
| MBL2      | -0.126119455 | 0.016505589 | 0.029153759 |
| GRID2IP   | -0.12611834  | 0.016506551 | 0.029153759 |
| SNORA20   | 0.126117769  | 0.016507044 | 0.029153759 |
| LOC388692 | -0.126112281 | 0.016511783 | 0.029159543 |
| AMIGO3    | 0.126076726  | 0.016542517 | 0.029211227 |
| MRPL39    | -0.126043778 | 0.016571041 | 0.029259001 |
| TRIM36    | -0.126032679 | 0.016580659 | 0.029273389 |
| UHRF1     | 0.126025191  | 0.01658715  | 0.029281617 |
| KGFLP1    | -0.126023911 | 0.01658826  | 0.029281617 |
| RCN3      | 0.126017418  | 0.016593892 | 0.029288962 |
| PMAIP1    | -0.1259922   | 0.016615779 | 0.029324995 |
| RANBP9    | -0.125963097 | 0.01664107  | 0.029367028 |
| ATF5      | -0.125945573 | 0.016656315 | 0.029391326 |
| SLC2A8    | 0.125932287  | 0.01666788  | 0.029409129 |
| PEMT      | 0.125915329  | 0.016682654 | 0.029432588 |
| PTGS1     | -0.125897502 | 0.016698195 | 0.029457398 |
| GDI1      | 0.125879863  | 0.016713586 | 0.029481937 |
| RPS6KL1   | 0.125844676  | 0.016744326 | 0.029533545 |
| SDSL      | 0.125811007  | 0.016773786 | 0.029582885 |
| TTC39A    | 0.125798597  | 0.016784655 | 0.029599434 |
| CCDC15    | -0.125769867 | 0.016809843 | 0.029641086 |
| FOXA2     | 0.125768262  | 0.016811251 | 0.029641086 |
| HMGB3L1   | 0.125750116  | 0.016827178 | 0.029666542 |
| AMPD1     | -0.125731423 | 0.016843599 | 0.029692862 |
| PSG5      | -0.125694133 | 0.016876398 | 0.02974805  |
| FABP5     | 0.125680904  | 0.016888048 | 0.02976595  |
| TROVE2    | -0.12562019  | 0.016941602 | 0.029857699 |
| ACOT9     | 0.125595514  | 0.01696341  | 0.029893488 |
| PAH       | -0.125585982 | 0.016971842 | 0.029905701 |
| CECR1     | -0.125577702 | 0.016979168 | 0.029915962 |
| C22orf39  | 0.125550675  | 0.017003102 | 0.029955482 |
| PEX19     | -0.125542317 | 0.017010509 | 0.029965549 |
| KCNV2     | -0.125539322 | 0.017013164 | 0.029965549 |
| LYPD4     | 0.125539135  | 0.01701333  | 0.029965549 |
| YEATS2    | -0.125492936 | 0.017054331 | 0.030035108 |
| FAM164C   | -0.125444915 | 0.017097041 | 0.030105942 |
| ZNF335    | 0.125444315  | 0.017097575 | 0.030105942 |
| MYH15     | -0.125426748 | 0.017113223 | 0.030130832 |
| PRDM7     | 0.125422546  | 0.017116968 | 0.030134762 |
| LOC641367 | -0.125392929 | 0.017143383 | 0.030178597 |
| SNORA38B  | 0.125359457  | 0.017173279 | 0.030228553 |

|           |              |             |             |
|-----------|--------------|-------------|-------------|
| SIGIRR    | 0.125355718  | 0.017176621 | 0.030231763 |
| C1R       | -0.125321939 | 0.017206842 | 0.030282279 |
| ORMDL1    | 0.125301828  | 0.017224857 | 0.030311304 |
| ALS2CL    | -0.125288277 | 0.017237005 | 0.030330002 |
| CEP70     | -0.125278478 | 0.017245794 | 0.030342785 |
| DNMT3L    | -0.125261692 | 0.017260859 | 0.030366609 |
| TDRD9     | -0.125241011 | 0.017279436 | 0.030394824 |
| LOC401397 | 0.12524044   | 0.017279949 | 0.030394824 |
| ZNF639    | -0.125223025 | 0.017295606 | 0.030419677 |
| PAGE4     | 0.125214474  | 0.017303299 | 0.030430519 |
| RIMS1     | -0.125204686 | 0.017312107 | 0.03044332  |
| KCNMB1    | -0.125188403 | 0.01732677  | 0.030466415 |
| HDAC2     | 0.12512268   | 0.017386063 | 0.030567974 |
| C10orf55  | -0.125116971 | 0.017391221 | 0.030574343 |
| KIRREL3   | -0.125077498 | 0.017426927 | 0.030634411 |
| SVIP      | 0.125068351  | 0.017435209 | 0.030645249 |
| AFM       | -0.125067291 | 0.01743617  | 0.030645249 |
| DERL3     | 0.125043341  | 0.017457874 | 0.030680689 |
| FAM58B    | -0.12501976  | 0.017479268 | 0.030715576 |
| CNTNAP4   | 0.124999705  | 0.017497482 | 0.030743243 |
| C1orf180  | 0.124999024  | 0.0174981   | 0.030743243 |
| C14orf79  | 0.124996825  | 0.017500099 | 0.030744042 |
| C6orf127  | 0.124982542  | 0.017513081 | 0.030764136 |
| DOK2      | 0.124950502  | 0.017542236 | 0.030812632 |
| C2orf84   | -0.124941178 | 0.017550727 | 0.030824829 |
| ZNF492    | 0.124924366  | 0.017566048 | 0.030849017 |
| NCRNA0011 | -0.124912206 | 0.017577137 | 0.030865769 |
| NAP1L6    | 0.124840401  | 0.017642742 | 0.030978241 |
| HNRNPA1L2 | 0.124814536  | 0.017666427 | 0.031017093 |
| PPP1R9B   | -0.124793643 | 0.017685577 | 0.031047979 |
| SNORA36A  | 0.12477588   | 0.017701874 | 0.031073849 |
| C12orf70  | 0.124741965  | 0.017733026 | 0.031125789 |
| MAP3K8    | -0.124730135 | 0.017743903 | 0.031142138 |
| EBAG9     | 0.124720019  | 0.017753209 | 0.031155724 |
| HYOU1     | -0.124681367 | 0.017788806 | 0.031215443 |
| TRAF3     | -0.124663714 | 0.017805084 | 0.031241255 |
| LAMA4     | -0.124627203 | 0.017838793 | 0.031297644 |
| ITGB1BP3  | -0.124601848 | 0.017862234 | 0.03133601  |
| LOC440173 | 0.124600017  | 0.017863928 | 0.031336222 |
| EIF2A     | 0.124587898  | 0.017875142 | 0.031353132 |
| LOC91450  | 0.124571495  | 0.017890332 | 0.031377011 |
| CACNA1A   | 0.12456168   | 0.017899426 | 0.031390196 |
| TTC9C     | 0.124554561  | 0.017906024 | 0.031399003 |
| SLC16A14  | -0.124516767 | 0.017941091 | 0.031457724 |
| LOC115110 | -0.124486149 | 0.017969543 | 0.031504838 |
| SLC7A13   | 0.124447619  | 0.018005404 | 0.031564931 |

|           |              |             |             |
|-----------|--------------|-------------|-------------|
| C14orf149 | -0.124427975 | 0.018023711 | 0.031594244 |
| SCHIP1    | -0.124416354 | 0.018034549 | 0.03161046  |
| GAGE10    | 0.124400753  | 0.018049108 | 0.031633194 |
| RASA4P    | 0.12438808   | 0.018060942 | 0.031651149 |
| ABCC4     | -0.124348512 | 0.018097932 | 0.031711461 |
| ZNF71     | 0.12434786   | 0.018098542 | 0.031711461 |
| DZIP1L    | -0.124296303 | 0.018146843 | 0.031793294 |
| FAM129C   | -0.124284125 | 0.018158267 | 0.031810511 |
| RPL32P3   | -0.124247173 | 0.018192973 | 0.031868507 |
| OR51E1    | -0.124243133 | 0.018196771 | 0.031872357 |
| PRAMEF12  | -0.124239576 | 0.018200115 | 0.03187541  |
| DVL3      | -0.124199119 | 0.018238192 | 0.031939289 |
| RNF130    | -0.124160019 | 0.018275058 | 0.032001036 |
| LOC92973  | -0.124147632 | 0.01828675  | 0.032018695 |
| PRY2      | -0.124132025 | 0.018301492 | 0.032041688 |
| HPS4      | -0.124128309 | 0.018305004 | 0.03204502  |
| DGCR11    | -0.124119626 | 0.018313211 | 0.032056569 |
| LOC651250 | -0.124109826 | 0.018322478 | 0.032069972 |
| NXF2      | 0.124107819  | 0.018324376 | 0.032070476 |
| C20orf54  | -0.124059148 | 0.018370465 | 0.032148313 |
| MED12L    | -0.124031982 | 0.018396233 | 0.03219058  |
| RSPH9     | 0.124015289  | 0.018412083 | 0.032215484 |
| KCNIP2    | 0.123987896  | 0.018438119 | 0.032258033 |
| ZNF701    | -0.123986296 | 0.018439641 | 0.032258033 |
| HN1L      | 0.123971821  | 0.018453412 | 0.032279288 |
| RNF145    | -0.123949965 | 0.018474223 | 0.032312853 |
| GCN1L1    | 0.123946549  | 0.018477477 | 0.032315708 |
| TSHR      | -0.123936986 | 0.018486591 | 0.032328807 |
| MUM1      | -0.123927756 | 0.018495391 | 0.032340572 |
| MAPRE1    | 0.123926523  | 0.018496566 | 0.032340572 |
| MYL12A    | 0.123918348  | 0.018504363 | 0.032351365 |
| CXorf22   | -0.123907455 | 0.018514758 | 0.032366697 |
| MUM1L1    | -0.123858164 | 0.018561857 | 0.032446185 |
| C10orf140 | 0.123807075  | 0.018610784 | 0.032528854 |
| CCL14     | -0.123781948 | 0.018634888 | 0.032568127 |
| C9orf71   | -0.123777735 | 0.018638933 | 0.032572338 |
| SLBP      | 0.12375582   | 0.018659983 | 0.032606261 |
| C2orf81   | 0.123737542  | 0.018677555 | 0.032634102 |
| ZNF883    | 0.123723249  | 0.018691305 | 0.032655263 |
| AATK      | -0.123704329 | 0.018709522 | 0.032684223 |
| HYAL3     | 0.123695166  | 0.01871835  | 0.032696776 |
| LYPD5     | -0.123688512 | 0.018724763 | 0.032705109 |
| ADRB2     | -0.123658052 | 0.018754143 | 0.032753552 |
| LILRA2    | -0.123649157 | 0.01876273  | 0.032765676 |
| PARP16    | -0.123639264 | 0.018772285 | 0.032779487 |
| MYH2      | -0.123600231 | 0.018810025 | 0.032842507 |



|           |              |             |             |
|-----------|--------------|-------------|-------------|
| PLAC1     | 0.123572383  | 0.01883699  | 0.032886706 |
| KCTD14    | 0.123538269  | 0.01887007  | 0.032939973 |
| GLYAT     | -0.123537507 | 0.018870809 | 0.032939973 |
| SLU7      | 0.123530804  | 0.018877315 | 0.032945589 |
| SMTNL2    | 0.123529535  | 0.018878546 | 0.032945589 |
| CLSTN3    | -0.123529079 | 0.018878989 | 0.032945589 |
| CHMP7     | -0.123525136 | 0.018882817 | 0.032949383 |
| XIRP1     | -0.123523365 | 0.018884537 | 0.032949497 |
| NEK6      | 0.123516582  | 0.018891124 | 0.032958103 |
| SGK494    | 0.123495694  | 0.018911424 | 0.032989208 |
| ANKHD1    | -0.123494827 | 0.018912266 | 0.032989208 |
| EEF1A2    | -0.123458562 | 0.018947555 | 0.033047868 |
| F5        | -0.123456428 | 0.018949634 | 0.0330486   |
| SAP130    | -0.123443235 | 0.018962488 | 0.033068121 |
| MMP8      | -0.123437724 | 0.018967859 | 0.033074592 |
| SOHLH2    | 0.123433577  | 0.018971901 | 0.033078744 |
| ZNF737    | -0.123412846 | 0.018992123 | 0.033111103 |
| RBMS1     | -0.123387707 | 0.019016669 | 0.033150994 |
| OR2C1     | -0.123341604 | 0.019061756 | 0.033226684 |
| SPANXA2   | 0.123293837  | 0.019108569 | 0.033305369 |
| AGAP2     | -0.123282159 | 0.01912003  | 0.033322428 |
| SNORA79   | 0.123265637  | 0.019136253 | 0.033347785 |
| DEFB4A    | -0.123260812 | 0.019140994 | 0.033353127 |
| CCDC64B   | -0.123200572 | 0.01920026  | 0.033453471 |
| PWWP2B    | 0.123182342  | 0.019218228 | 0.033481848 |
| CLEC3B    | -0.123143013 | 0.019257039 | 0.03354653  |
| LIX1L     | 0.123112048  | 0.019287644 | 0.033596907 |
| CC2D2B    | -0.123099574 | 0.019299985 | 0.033614729 |
| ACAD10    | -0.123098294 | 0.019301251 | 0.033614729 |
| SAMD3     | -0.12309578  | 0.01930374  | 0.033616122 |
| TIAL1     | 0.123088601  | 0.019310846 | 0.033625558 |
| LRRC37A2  | -0.123080051 | 0.019319314 | 0.033637361 |
| LOC100129 | 0.123056182  | 0.019342968 | 0.033675602 |
| SH3BP5L   | 0.123011892  | 0.019386927 | 0.033749183 |
| ING2      | 0.122966058  | 0.01943251  | 0.033825579 |
| VGLL1     | -0.122948766 | 0.019449731 | 0.033851586 |
| KCNJ4     | -0.122947642 | 0.019450851 | 0.033851586 |
| LBR       | 0.122932372  | 0.01946607  | 0.033875113 |
| HNMT      | -0.12292184  | 0.019476574 | 0.033888656 |
| PRRG3     | -0.122921156 | 0.019477256 | 0.033888656 |
| POU6F1    | -0.122884572 | 0.01951378  | 0.033948508 |
| HILS1     | 0.122883285  | 0.019515065 | 0.033948508 |
| ZNF195    | -0.122879476 | 0.019518872 | 0.033952164 |
| D4S234E   | -0.122872691 | 0.019525654 | 0.033960995 |
| EMX2OS    | -0.122845636 | 0.019552716 | 0.034005095 |
| C1orf213  | 0.122831754  | 0.019566615 | 0.034026295 |

|           |              |             |             |
|-----------|--------------|-------------|-------------|
| MMACHC    | -0.122826573 | 0.019571805 | 0.034032349 |
| C5        | -0.122799812 | 0.019598628 | 0.034076015 |
| RGS3      | -0.122771327 | 0.019627215 | 0.03412274  |
| AGPS      | -0.122765947 | 0.019632617 | 0.034129153 |
| C4orf43   | 0.12274774   | 0.019650913 | 0.034157976 |
| C1orf131  | 0.122739961  | 0.019658735 | 0.03416859  |
| PLEKHB2   | -0.122680083 | 0.019719028 | 0.034270394 |
| GTF2E1    | -0.12266243  | 0.019736835 | 0.034298348 |
| STAT2     | -0.122618223 | 0.019781487 | 0.034372944 |
| SLC35F1   | -0.122606317 | 0.019793528 | 0.034390866 |
| TMEM107   | 0.122596845  | 0.019803112 | 0.034404516 |
| APIB1     | -0.122567874 | 0.01983245  | 0.034452482 |
| C11orf65  | -0.122558869 | 0.019841577 | 0.034465331 |
| LOC729375 | 0.122555195  | 0.019845301 | 0.034468793 |
| PRAM1     | -0.122518622 | 0.019882413 | 0.034530239 |
| HEPHL1    | 0.122508611  | 0.019892582 | 0.034544888 |
| NFAM1     | -0.122504993 | 0.019896258 | 0.034548259 |
| LOC100270 | 0.122493098  | 0.019908349 | 0.03456624  |
| SUPT6H    | 0.122443108  | 0.01995923  | 0.034651562 |
| TUSC3     | -0.122437975 | 0.019964461 | 0.034657622 |
| APOC1P1   | 0.122417475  | 0.019985364 | 0.034690885 |
| C17orf98  | 0.122409832  | 0.019993162 | 0.034701396 |
| NCF4      | 0.122399017  | 0.020004201 | 0.034717531 |
| CNTN2     | -0.122396474 | 0.020006798 | 0.034719012 |
| ZNF652    | -0.122368408 | 0.020035472 | 0.034765743 |
| LBX2      | 0.122347848  | 0.020056502 | 0.034798937 |
| SESTD1    | -0.122346289 | 0.020058097 | 0.034798937 |
| TMIE      | 0.122343487  | 0.020060965 | 0.034800881 |
| OR2A9P    | -0.12233349  | 0.020071198 | 0.034815601 |
| PDCL      | -0.122320216 | 0.020084794 | 0.03483615  |
| C1orf106  | 0.122240273  | 0.020166844 | 0.034975415 |
| CUX2      | -0.122224827 | 0.02018273  | 0.034999918 |
| DMKN      | 0.122214824  | 0.020193024 | 0.035014722 |
| ZNF560    | 0.122198787  | 0.020209537 | 0.035039693 |
| RBBP7     | 0.122197421  | 0.020210944 | 0.035039693 |
| MARCO     | -0.122194693 | 0.020213754 | 0.035041514 |
| DPF1      | 0.122160017  | 0.020249507 | 0.035097408 |
| SRP72     | -0.122160003 | 0.020249521 | 0.035097408 |
| CPA6      | 0.122151387  | 0.020258413 | 0.035109764 |
| PLK3      | -0.122136117 | 0.02027418  | 0.035134031 |
| COX7A1    | 0.122092835  | 0.02031893  | 0.035208518 |
| PRPF40B   | 0.122085164  | 0.02032687  | 0.035219211 |
| ZNF33B    | -0.122063068 | 0.020349756 | 0.035255797 |
| TULP3     | -0.122058241 | 0.020354758 | 0.035260103 |
| LTBR      | 0.122057253  | 0.020355782 | 0.035260103 |
| LRRC29    | 0.122012592  | 0.02040212  | 0.035337296 |

|           |              |             |             |
|-----------|--------------|-------------|-------------|
| SGCA      | -0.121979617 | 0.020436392 | 0.035391391 |
| FCAMR     | -0.121977966 | 0.02043811  | 0.035391391 |
| PPHLN1    | 0.121977414  | 0.020438684 | 0.035391391 |
| FBRSL1    | 0.121958787  | 0.020458068 | 0.035421877 |
| FABP7     | 0.121933759  | 0.020484137 | 0.035463931 |
| ANXA10    | -0.121926854 | 0.020491335 | 0.035473308 |
| CENPF     | 0.121924439  | 0.020493853 | 0.035473487 |
| KIAA0319  | 0.121923338  | 0.020495001 | 0.035473487 |
| GABRB1    | 0.121889492  | 0.020530318 | 0.035531527 |
| JPH1      | -0.121872381 | 0.020548192 | 0.035559372 |
| PADI3     | -0.121801893 | 0.02062197  | 0.035683947 |
| GAL3ST1   | 0.121789192  | 0.020635288 | 0.035703888 |
| SELL      | -0.121777457 | 0.0206476   | 0.035722087 |
| TP53INP1  | -0.121749743 | 0.020676702 | 0.035769329 |
| OSR1      | -0.121717118 | 0.020711005 | 0.035824655 |
| SYT17     | -0.121715905 | 0.020712281 | 0.035824655 |
| QRSL1     | 0.121710335  | 0.020718143 | 0.035831682 |
| GSTP1     | 0.121704766  | 0.020724006 | 0.03583871  |
| DZIP3     | -0.121652851 | 0.020778724 | 0.035930216 |
| CETN3     | 0.121638548  | 0.020793822 | 0.0359532   |
| ZNF714    | -0.121629102 | 0.020803797 | 0.035967326 |
| SPZ1      | 0.12162222   | 0.020811068 | 0.03597391  |
| LINS1     | -0.121622077 | 0.020811219 | 0.03597391  |
| B3GNT7    | -0.121570958 | 0.020865294 | 0.036064254 |
| C21orf99  | 0.121567355  | 0.02086911  | 0.03606772  |
| G6PC2     | -0.121554798 | 0.020882414 | 0.036087581 |
| AKR7A3    | -0.121537091 | 0.020901187 | 0.036116888 |
| HDHD1A    | 0.121490228  | 0.020950941 | 0.036199722 |
| MRPL49    | -0.121487336 | 0.020954015 | 0.036201892 |
| PHF10     | -0.12148146  | 0.020960261 | 0.036209542 |
| LOC152225 | -0.121472568 | 0.020969717 | 0.036222736 |
| KRBA1     | 0.121462608  | 0.020980313 | 0.036237514 |
| NEUROD1   | 0.121461105  | 0.020981912 | 0.036237514 |
| KRTAP4-4  | 0.121412186  | 0.021034025 | 0.036324369 |
| COL11A2   | 0.121407799  | 0.021038704 | 0.036329298 |
| COL17A1   | -0.121391864 | 0.021055708 | 0.036355508 |
| CCDC21    | -0.121387789 | 0.021060058 | 0.036359867 |
| DBN1      | 0.121377934  | 0.021070581 | 0.036374881 |
| TFEB      | 0.121373037  | 0.021075812 | 0.036380757 |
| EMP3      | 0.121355929  | 0.021094095 | 0.036409162 |
| DVL1      | 0.121330505  | 0.021121291 | 0.036452943 |
| CTXN1     | 0.121318692  | 0.021133938 | 0.03647161  |
| GTF2IP1   | -0.12126386  | 0.021192725 | 0.036569891 |
| CSDC2     | -0.121247442 | 0.021210355 | 0.036597143 |
| CAND2     | -0.121233553 | 0.021225279 | 0.03661972  |
| UBE2O     | 0.12122663   | 0.021232721 | 0.036629387 |

|           |              |             |             |
|-----------|--------------|-------------|-------------|
| SNORA40   | 0.12122265   | 0.021237001 | 0.036633596 |
| DGKQ      | -0.121191293 | 0.021270744 | 0.036688626 |
| FAM118A   | 0.121181816  | 0.021280952 | 0.036703054 |
| LOC100287 | 0.121179897  | 0.021283019 | 0.03670344  |
| ANKRD40   | -0.121177707 | 0.021285379 | 0.036704331 |
| EFEMP2    | -0.121170689 | 0.021292942 | 0.036714194 |
| GRPEL1    | 0.121164853  | 0.021299233 | 0.036721862 |
| C20orf135 | 0.121143303  | 0.021322477 | 0.036758754 |
| MIMT1     | 0.121101983  | 0.021367107 | 0.036832505 |
| RNF135    | -0.12109504  | 0.021374614 | 0.036842257 |
| PTX4      | -0.121045637 | 0.021428097 | 0.036931246 |
| ATXN7L3   | -0.121043123 | 0.021430821 | 0.036932745 |
| GPR50     | -0.120998978 | 0.021478715 | 0.03701208  |
| ZNF630    | -0.120967218 | 0.02151323  | 0.037068348 |
| ZNF777    | -0.120964509 | 0.021516177 | 0.037070219 |
| SLC25A23  | -0.120956931 | 0.021524419 | 0.037081212 |
| GRHL2     | -0.120949792 | 0.021532187 | 0.037091386 |
| PLEKHB1   | 0.120942832  | 0.021539764 | 0.037101228 |
| SP110     | 0.120935396  | 0.021547861 | 0.037111965 |
| GLRX      | 0.120923119  | 0.021561234 | 0.037131786 |
| CCBL2     | -0.120877246 | 0.021611267 | 0.037213345 |
| MAPK9     | -0.120876272 | 0.02161233  | 0.037213345 |
| MAGEA12   | 0.1208706    | 0.021618524 | 0.037220792 |
| TXNL4B    | 0.120850766  | 0.021640194 | 0.037254881 |
| PI4KAP1   | -0.120840547 | 0.021651366 | 0.037270892 |
| MALL      | -0.120826073 | 0.021667199 | 0.037294925 |
| RBM1A1    | 0.120817111  | 0.021677008 | 0.037308583 |
| DPY19L2   | -0.120807454 | 0.021687581 | 0.037323555 |
| C11orf41  | -0.120778798 | 0.021718982 | 0.037374365 |
| HRH1      | -0.120767081 | 0.021731834 | 0.037390276 |
| GJC3      | -0.120766945 | 0.021731983 | 0.037390276 |
| LOC387646 | -0.120753729 | 0.021746486 | 0.037408871 |
| LOC285074 | 0.120753673  | 0.021746548 | 0.037408871 |
| PCSK9     | 0.120724289  | 0.021778823 | 0.037461156 |
| ZNF341    | 0.120698362  | 0.021807336 | 0.03750696  |
| SHOX2     | 0.120689031  | 0.021817605 | 0.037521383 |
| CRYBA4    | 0.120674255  | 0.021833877 | 0.037545982 |
| SLC22A5   | -0.120672618 | 0.02183568  | 0.037545982 |
| SUN3      | 0.120641868  | 0.021869577 | 0.037601021 |
| FBRS      | 0.120617657  | 0.021896297 | 0.037643712 |
| METTL10   | -0.120588259 | 0.021928781 | 0.037696303 |
| LRRIQ4    | -0.1205837   | 0.021933822 | 0.037701715 |
| MUSK      | -0.120517866 | 0.022006732 | 0.037823775 |
| SNORA25   | 0.120501055  | 0.022025384 | 0.037852565 |
| BIN3      | 0.120489806  | 0.022037873 | 0.037869128 |
| KAAG1     | 0.120487698  | 0.022040213 | 0.037869128 |

|           |              |             |             |
|-----------|--------------|-------------|-------------|
| UPF3A     | 0.120487237  | 0.022040726 | 0.037869128 |
| PIAS3     | -0.120481793 | 0.022046772 | 0.037876248 |
| CDH4      | -0.120466111 | 0.022064198 | 0.037902915 |
| CHKB      | 0.120460926  | 0.022069962 | 0.037909547 |
| MRAS      | -0.120440262 | 0.022092948 | 0.037945758 |
| C17orf93  | 0.120429263  | 0.022105191 | 0.037963511 |
| EFCAB2    | 0.120404697  | 0.022132556 | 0.038007231 |
| KPNA5     | -0.120398901 | 0.022139017 | 0.038015048 |
| METTL7B   | 0.120336242  | 0.022208968 | 0.038131873 |
| CALCR     | 0.120302147  | 0.022247112 | 0.038194071 |
| TMEM185B  | -0.12027122  | 0.022281759 | 0.03824982  |
| CROT      | -0.120269734 | 0.022283425 | 0.03824982  |
| GAGE2C    | 0.120256032  | 0.022298792 | 0.038272898 |
| TWISTNB   | -0.120248213 | 0.022307565 | 0.038284657 |
| CEACAM19  | 0.120241239  | 0.022315391 | 0.038294789 |
| IQCG      | -0.120224358 | 0.022334348 | 0.038324017 |
| FLJ39582  | 0.120139702  | 0.022429624 | 0.038484187 |
| ST8SIA2   | -0.120088579 | 0.022487329 | 0.038579873 |
| FANCC     | -0.120068065 | 0.022510521 | 0.038616334 |
| ST6GALNAC | 0.119995087  | 0.022593192 | 0.038754816 |
| CTSZ      | 0.119993191  | 0.022595344 | 0.038755169 |
| CDADC1    | -0.119973181 | 0.022618058 | 0.038790788 |
| OR5K1     | -0.119968161 | 0.022623761 | 0.038797226 |
| TMC3      | -0.119949155 | 0.022645359 | 0.038830922 |
| LOC440040 | 0.119927549  | 0.022669935 | 0.038869716 |
| PAPLN     | -0.119911286 | 0.022688448 | 0.03889811  |
| C8orf42   | -0.119900524 | 0.022700706 | 0.038914636 |
| MAGEA11   | 0.119899392  | 0.022701996 | 0.038914636 |
| DLX6AS    | 0.119865535  | 0.022740599 | 0.038977453 |
| P4HA1     | 0.119851756  | 0.022756326 | 0.039001053 |
| VWA1      | 0.119843711  | 0.022765513 | 0.03901344  |
| LOC728613 | 0.11977183   | 0.022847736 | 0.039150978 |
| UNC5A     | -0.119728655 | 0.022897247 | 0.039232442 |
| C1orf107  | -0.119715381 | 0.022912488 | 0.039255179 |
| ZNF648    | -0.119700837 | 0.022929197 | 0.039280427 |
| CLEC12B   | -0.119691357 | 0.022940093 | 0.039295713 |
| RORC      | -0.119681491 | 0.022951439 | 0.039311767 |
| FUK       | 0.119549674  | 0.023103486 | 0.039565998 |
| OR52D1    | -0.119549366 | 0.023103841 | 0.039565998 |
| AQP9      | -0.11953047  | 0.023125709 | 0.039600043 |
| STYK1     | -0.119515574 | 0.02314296  | 0.039626176 |
| UGT2B7    | -0.119501428 | 0.023159353 | 0.039650835 |
| COCH      | 0.11948281   | 0.023180942 | 0.039684386 |
| C14orf115 | 0.119473246  | 0.02319204  | 0.039699972 |
| NXF1      | -0.119469788 | 0.023196053 | 0.03970343  |
| IL1A      | 0.11945854   | 0.023209114 | 0.03972237  |

|           |              |             |             |
|-----------|--------------|-------------|-------------|
| OTUD7B    | -0.119456363 | 0.023211642 | 0.039723284 |
| LINGO2    | -0.119452934 | 0.023215624 | 0.039726685 |
| SLC39A13  | 0.119446151  | 0.023223505 | 0.039736756 |
| LOC286359 | 0.119440181  | 0.023230443 | 0.039745212 |
| ZNHIT6    | -0.119410616 | 0.023264826 | 0.03980062  |
| ST7OT1    | 0.119367418  | 0.023315145 | 0.039883276 |
| SPRR2G    | -0.119334555 | 0.023353487 | 0.039945245 |
| PCDHGA8   | 0.119332933  | 0.023355382 | 0.039945245 |
| VNN2      | 0.119324817  | 0.02336486  | 0.039958024 |
| ZNF557    | -0.119309947 | 0.023382235 | 0.039984304 |
| TRHR      | -0.11930762  | 0.023384955 | 0.039985523 |
| C22orf28  | 0.119277631  | 0.023420032 | 0.040042062 |
| HES1      | -0.119272642 | 0.023425873 | 0.04004861  |
| CCL13     | 0.119268992  | 0.023430147 | 0.040052478 |
| ATG10     | 0.119265487  | 0.023434251 | 0.040056056 |
| LOC255025 | 0.119249049  | 0.023453507 | 0.04008553  |
| FBXO22    | -0.11922794  | 0.023478256 | 0.040124385 |
| GMEB1     | -0.119219541 | 0.02348811  | 0.040137781 |
| PSORS1C2  | -0.1192139   | 0.023494729 | 0.040145648 |
| HAS1      | -0.119173349 | 0.023542365 | 0.040223592 |
| S100PBP   | -0.119151154 | 0.023568473 | 0.040264746 |
| PLA2G7    | 0.119083426  | 0.023648295 | 0.040397649 |
| PCDHA8    | -0.119033588 | 0.023707182 | 0.040494771 |
| C14orf72  | 0.11902636   | 0.023715733 | 0.040505903 |
| BRPF3     | -0.119000037 | 0.023746897 | 0.040555651 |
| CUL4B     | -0.118976075 | 0.023775295 | 0.040600669 |
| KLK1      | 0.118926384  | 0.023834281 | 0.040697909 |
| ZNF234    | -0.118907831 | 0.023856337 | 0.040732077 |
| C1orf53   | 0.118894849  | 0.02387178  | 0.04075495  |
| GAGE12F   | 0.118875426  | 0.023894902 | 0.040790929 |
| NSUN2     | -0.118865982 | 0.023906152 | 0.040803553 |
| CLEC4G    | -0.118865777 | 0.023906395 | 0.040803553 |
| GAL3ST4   | -0.118853143 | 0.023921453 | 0.040825754 |
| EPYC      | -0.118806709 | 0.023976861 | 0.04091681  |
| LGSN      | -0.11878896  | 0.023998069 | 0.040949493 |
| FSTL5     | 0.118781754  | 0.024006684 | 0.040960684 |
| LOC339524 | -0.118735936 | 0.024061524 | 0.041050737 |
| CT45A4    | 0.118691819  | 0.024114431 | 0.041137476 |
| SNAR-B2   | 0.118686844  | 0.024120403 | 0.041144139 |
| S100A3    | 0.118681448  | 0.024126882 | 0.041151666 |
| TTL6      | 0.118554033  | 0.024280315 | 0.04140982  |
| RUFY3     | -0.118526133 | 0.024314024 | 0.04146376  |
| ADAMTS16  | -0.118514969 | 0.024327524 | 0.04148323  |
| MS4A1     | -0.11842497  | 0.02443659  | 0.041665641 |
| MIR17HG   | 0.118408575  | 0.024456504 | 0.041696026 |
| MLEC      | 0.118385504  | 0.02448455  | 0.041740269 |

|           |              |             |             |
|-----------|--------------|-------------|-------------|
| SNCB      | 0.118351322  | 0.024526154 | 0.041807615 |
| FOXR1     | 0.118346495  | 0.024532035 | 0.041814061 |
| PASD1     | 0.118338695  | 0.02454154  | 0.04182668  |
| C19orf40  | 0.118325512  | 0.02455761  | 0.041850489 |
| TGM4      | 0.118276095  | 0.024617933 | 0.041949699 |
| VBP1      | 0.118272773  | 0.024621992 | 0.041953025 |
| ZBED2     | 0.118269339  | 0.024626189 | 0.041956587 |
| VN1R1     | -0.118257972 | 0.024640087 | 0.041976675 |
| MTCH2     | 0.118236585  | 0.024666253 | 0.042017657 |
| CLRN1OS   | -0.118230272 | 0.024673982 | 0.042027228 |
| BPIL3     | 0.118226627  | 0.024678445 | 0.042031235 |
| CACNG6    | 0.118193225  | 0.024719377 | 0.042095277 |
| CYP2B6    | -0.118192493 | 0.024720275 | 0.042095277 |
| OR10J3    | -0.118190323 | 0.024722936 | 0.042096209 |
| ANKRD27   | -0.118165096 | 0.024753892 | 0.042145316 |
| SLC24A6   | -0.118157734 | 0.024762932 | 0.042157104 |
| KIR3DL1   | -0.118138895 | 0.024786079 | 0.042192903 |
| N4BP2L2   | -0.11813638  | 0.024789171 | 0.042194559 |
| SHC2      | 0.118121519  | 0.024807446 | 0.042222057 |
| MGC23270  | 0.118114112  | 0.024816558 | 0.042233956 |
| RASD2     | -0.118105965 | 0.024826585 | 0.04224741  |
| NPC1      | -0.118103096 | 0.024830116 | 0.042249808 |
| C16orf72  | -0.118091686 | 0.024844166 | 0.042270104 |
| GSG1      | -0.118089522 | 0.024846831 | 0.042271027 |
| STK3      | 0.1180633    | 0.024879149 | 0.042322392 |
| ESPL1     | 0.118040668  | 0.02490707  | 0.042366272 |
| ARHGAP30  | -0.117974066 | 0.024989397 | 0.042500886 |
| RIN1      | 0.117973193  | 0.024990478 | 0.042500886 |
| BTNL2     | 0.117957839  | 0.025009492 | 0.04252959  |
| SSX8      | 0.117915683  | 0.025061758 | 0.042614832 |
| STMN2     | -0.117901915 | 0.025078848 | 0.042640251 |
| HTATSF1   | -0.117877782 | 0.025108829 | 0.042686671 |
| ZNF716    | 0.117876488  | 0.025110437 | 0.042686671 |
| TMEM189-  | -0.117871665 | 0.025116433 | 0.04269322  |
| NR2E3     | -0.11785889  | 0.02513232  | 0.042716579 |
| SLC46A2   | -0.117852003 | 0.025140888 | 0.042727495 |
| FABP9     | 0.117807547  | 0.025196258 | 0.042817944 |
| NPHS1     | 0.117756951  | 0.025259404 | 0.042921589 |
| TNNT2     | 0.117719274  | 0.025306515 | 0.042997973 |
| SP7       | 0.117715521  | 0.025311211 | 0.043002284 |
| HLA-C     | 0.117704705  | 0.025324751 | 0.043021618 |
| PFKFB1    | -0.117674536 | 0.025362552 | 0.043082159 |
| RUNX3     | -0.11766992  | 0.025368341 | 0.043088316 |
| MAL2      | 0.117665128  | 0.02537435  | 0.043094847 |
| IL11RA    | 0.117630313  | 0.02541805  | 0.043165385 |
| LOC550643 | 0.117528175  | 0.02554663  | 0.043380042 |

|           |              |             |             |
|-----------|--------------|-------------|-------------|
| SAMD5     | -0.117505287 | 0.025575518 | 0.043425394 |
| PHYH      | -0.117500173 | 0.025581978 | 0.04343266  |
| KIAA1529  | 0.117491223  | 0.025593284 | 0.043448151 |
| GZMM      | 0.117468847  | 0.025621572 | 0.043492466 |
| RNF20     | -0.117460877 | 0.025631655 | 0.043505872 |
| ZUFSP     | -0.117456731 | 0.025636901 | 0.043511069 |
| ZNF79     | -0.117454856 | 0.025639274 | 0.043511388 |
| NUAK2     | -0.117449826 | 0.02564564  | 0.043518483 |
| SLC16A8   | -0.117431532 | 0.025668806 | 0.043554084 |
| CD53      | -0.117428735 | 0.025672349 | 0.043555693 |
| MYH16     | -0.11742733  | 0.025674129 | 0.043555693 |
| ZFP37     | -0.117418549 | 0.025685257 | 0.04357086  |
| PDK1      | -0.117409495 | 0.025696735 | 0.043586618 |
| MUC12     | 0.117393405  | 0.025717144 | 0.04361752  |
| ATP2B1    | -0.117368876 | 0.025748285 | 0.043666618 |
| KRT222    | -0.117360057 | 0.025759489 | 0.043681899 |
| RIT2      | -0.11735335  | 0.025768012 | 0.043692631 |
| RAB40B    | 0.117347363  | 0.025775622 | 0.043701815 |
| CELF3     | 0.117282146  | 0.025858651 | 0.043838539 |
| FER1L5    | 0.117279469  | 0.025862064 | 0.043838539 |
| C10orf120 | 0.117278839  | 0.025862867 | 0.043838539 |
| TFF2      | 0.117259289  | 0.025887805 | 0.043877075 |
| PM20D1    | -0.117253172 | 0.025895612 | 0.043886572 |
| MAPKAP1   | 0.117240766  | 0.025911451 | 0.043909679 |
| CDAN1     | 0.117221604  | 0.025935934 | 0.043947428 |
| KLKB1     | -0.117212279 | 0.025947855 | 0.043963887 |
| LCAT      | -0.117209433 | 0.025951493 | 0.043966311 |
| SYCP2     | -0.117204114 | 0.025958297 | 0.043974096 |
| PHC2      | 0.117202132  | 0.025960832 | 0.043974651 |
| LIF       | -0.117196663 | 0.025967828 | 0.043982761 |
| TBC1D17   | 0.117187444  | 0.025979626 | 0.043994311 |
| CNTNAP3   | -0.117187223 | 0.025979909 | 0.043994311 |
| CABP2     | -0.117186156 | 0.025981275 | 0.043994311 |
| GPR18     | -0.117113122 | 0.02607491  | 0.04414911  |
| ERBB3     | 0.117105757  | 0.026084368 | 0.044161369 |
| XYLT2     | 0.117082929  | 0.026113703 | 0.044207277 |
| FSD1L     | -0.117016138 | 0.026199697 | 0.044349084 |
| NRTN      | 0.116996174  | 0.026225448 | 0.04438613  |
| RGL3      | -0.116995716 | 0.02622604  | 0.04438613  |
| B3GNT6    | -0.116980283 | 0.026245961 | 0.04441607  |
| ADAMTS13  | -0.11697043  | 0.026258688 | 0.044433832 |
| FMO6P     | 0.116959943  | 0.026272238 | 0.044452983 |
| KLRD1     | -0.116952302 | 0.026282114 | 0.044465917 |
| MRS2      | 0.116947932  | 0.026287764 | 0.044471698 |
| OR5M11    | 0.116914621  | 0.026330868 | 0.044540833 |
| TTLL2     | -0.116878812 | 0.026377272 | 0.044615541 |



|           |              |             |             |
|-----------|--------------|-------------|-------------|
| MESDC1    | -0.116786154 | 0.026497671 | 0.044815381 |
| WNT7B     | -0.116770772 | 0.026517704 | 0.044845455 |
| GALNT5    | -0.116758794 | 0.026533313 | 0.044868042 |
| C13orf30  | -0.116751165 | 0.026543259 | 0.04488105  |
| MFAP1     | 0.116739671  | 0.026558249 | 0.044902583 |
| KIAA1609  | -0.116715621 | 0.026589638 | 0.044951836 |
| ST3GAL5   | -0.11667399  | 0.026644049 | 0.045039999 |
| SMNDC1    | -0.116669802 | 0.026649527 | 0.045045437 |
| ZNF667    | -0.11665287  | 0.026671688 | 0.045079069 |
| C18orf32  | 0.116637075  | 0.026692376 | 0.045110206 |
| CLCN7     | 0.116613251  | 0.026723604 | 0.045159149 |
| LOC100271 | 0.116582045  | 0.026764558 | 0.045224518 |
| GRAMD1B   | -0.116525811 | 0.026838493 | 0.0453456   |
| EGFL7     | 0.116498652  | 0.026874263 | 0.045402184 |
| TPRXL     | 0.116486736  | 0.026889971 | 0.045424868 |
| OR1C1     | 0.116476278  | 0.026903763 | 0.045443808 |
| DLK1      | 0.116474774  | 0.026905746 | 0.045443808 |
| GCGR      | -0.116465047 | 0.02691858  | 0.045461629 |
| GIMAP1    | -0.116461642 | 0.026923075 | 0.045465364 |
| GRAMD2    | -0.116448196 | 0.026940827 | 0.045491485 |
| CXorf49B  | 0.11642824   | 0.026967192 | 0.045531904 |
| TMEM220   | -0.116426618 | 0.026969337 | 0.045531904 |
| C10orf58  | 0.116405786  | 0.026996885 | 0.04557455  |
| APOO      | 0.116385503  | 0.027023732 | 0.045616004 |
| HS2ST1    | -0.116377104 | 0.027034855 | 0.045630912 |
| ASCL1     | -0.116357281 | 0.027061124 | 0.04567138  |
| DMBT1     | 0.116349616  | 0.027071286 | 0.04568466  |
| NPNT      | -0.116345601 | 0.027076612 | 0.045689775 |
| TMEM175   | -0.116340295 | 0.027083651 | 0.04569778  |
| C2orf54   | 0.116337955  | 0.027086755 | 0.04569834  |
| MAGEA10   | 0.116336585  | 0.027088572 | 0.04569834  |
| C1orf88   | 0.116322755  | 0.027106928 | 0.045722234 |
| ADSSL1    | -0.116322455 | 0.027107327 | 0.045722234 |
| SRMS      | -0.116303782 | 0.027132127 | 0.045760189 |
| MS4A10    | -0.116286456 | 0.027155157 | 0.045795153 |
| CCDC114   | 0.116275688  | 0.027169478 | 0.045815424 |
| ZC3H12A   | -0.116239055 | 0.027218248 | 0.045893777 |
| GUCA2B    | 0.116186909  | 0.0272878   | 0.046007157 |
| LAMB2     | -0.116168154 | 0.027312853 | 0.046045497 |
| EZH1      | -0.116151244 | 0.027335457 | 0.046079704 |
| ALDH5A1   | -0.116142365 | 0.027347332 | 0.046095821 |
| C7orf51   | -0.116130576 | 0.027363107 | 0.046116614 |
| CCL8      | 0.116129685  | 0.027364299 | 0.046116614 |
| SMG7      | -0.116078844 | 0.027432421 | 0.046227506 |
| PLSCR5    | 0.116043066  | 0.027480447 | 0.046304519 |
| MCHR1     | 0.116036137  | 0.027489757 | 0.046316287 |

|           |              |             |             |
|-----------|--------------|-------------|-------------|
| PLXND1    | -0.11602426  | 0.02750572  | 0.046339262 |
| FAM105A   | -0.115938857 | 0.027620743 | 0.046529107 |
| GPR108    | 0.115920502  | 0.027645517 | 0.046566902 |
| USP27X    | 0.115859338  | 0.027728212 | 0.046702245 |
| KIFAP3    | -0.115838436 | 0.02775652  | 0.04674597  |
| CASC3     | 0.115821113  | 0.02778     | 0.046781558 |
| CFD       | 0.115800603  | 0.027807822 | 0.046821076 |
| TPSG1     | -0.115800347 | 0.027808169 | 0.046821076 |
| EHD1      | 0.115776365  | 0.027840731 | 0.046871939 |
| GAGE2E    | 0.115755994  | 0.027868417 | 0.046914583 |
| RBPMS2    | -0.115695151 | 0.027951245 | 0.047050042 |
| TLR7      | -0.115675863 | 0.027977547 | 0.047090336 |
| ZCCHC7    | 0.115672337  | 0.027982357 | 0.047094451 |
| FIGN      | -0.115596147 | 0.028086476 | 0.04726569  |
| SLC14A2   | -0.115586498 | 0.028099686 | 0.047283924 |
| TRPV6     | -0.115578213 | 0.028111032 | 0.04729902  |
| DDAH1     | -0.115574196 | 0.028116535 | 0.047304283 |
| SELV      | 0.115553973  | 0.028144253 | 0.047346916 |
| SPAG1     | -0.115542153 | 0.028160463 | 0.047370186 |
| USP21     | 0.115528657  | 0.028178983 | 0.047394274 |
| RCOR2     | 0.115527414  | 0.028180689 | 0.047394274 |
| GPRIN1    | 0.115526515  | 0.028181923 | 0.047394274 |
| DFFB      | -0.115523472 | 0.0281861   | 0.047397296 |
| ANO4      | -0.115516634 | 0.02819549  | 0.047409084 |
| CLDN11    | -0.115511687 | 0.028202284 | 0.047416503 |
| CCK       | 0.115505382  | 0.028210946 | 0.047427063 |
| OR4K2     | -0.115493345 | 0.028227488 | 0.047448154 |
| CNIH      | -0.115492786 | 0.028228257 | 0.047448154 |
| ZNF467    | -0.11548286  | 0.028241904 | 0.047467088 |
| ACTN4     | -0.115436193 | 0.028306145 | 0.047571044 |
| LOC349114 | -0.115429568 | 0.028315276 | 0.047582374 |
| AURKC     | 0.115409216  | 0.028343339 | 0.047625514 |
| CCL20     | 0.115396109  | 0.028361425 | 0.047651884 |
| RBP5      | 0.11537599   | 0.028389206 | 0.047694536 |
| ANGEL1    | -0.115369664 | 0.028397945 | 0.047705194 |
| STK32A    | -0.115329397 | 0.028453631 | 0.047794708 |
| ASB5      | -0.115298891 | 0.02849588  | 0.047861639 |
| DKC1      | 0.115296993  | 0.028498512 | 0.047862022 |
| KNDC1     | -0.115283245 | 0.028517571 | 0.047889992 |
| ABCA17P   | 0.115256729  | 0.028554362 | 0.047947734 |
| RASL10A   | 0.115253893  | 0.0285583   | 0.047950303 |
| FAM70A    | -0.115247186 | 0.028567614 | 0.047961897 |
| ATRNL1    | -0.115237605 | 0.028580922 | 0.047980196 |
| PPPDE2    | 0.115210788  | 0.028618202 | 0.048038731 |
| PIGV      | -0.11520175  | 0.028630777 | 0.048055787 |
| RBM4B     | 0.115188401  | 0.028649356 | 0.048082375 |

|           |              |             |             |
|-----------|--------------|-------------|-------------|
| MTAP      | -0.1151869   | 0.028651446 | 0.048082375 |
| TIMD4     | -0.115174552 | 0.028668643 | 0.048105911 |
| LOC401387 | 0.115173361  | 0.028670302 | 0.048105911 |
| QRICH2    | 0.115160218  | 0.028688617 | 0.04813166  |
| SNORA4    | -0.11515888  | 0.028690481 | 0.04813166  |
| ZNF815    | 0.115128876  | 0.028732331 | 0.048197808 |
| C20orf85  | 0.115082364  | 0.028797311 | 0.048302003 |
| OR5B2     | -0.115080945 | 0.028799296 | 0.048302003 |
| PCDH11Y   | -0.115069265 | 0.028815635 | 0.048324938 |
| TDRD5     | 0.1150677    | 0.028817824 | 0.048324938 |
| TERF2     | -0.115064329 | 0.028822541 | 0.048328779 |
| FBXW8     | -0.11498595  | 0.028932408 | 0.048508917 |
| TLE3      | -0.114928456 | 0.029013229 | 0.048636381 |
| XPNPEP3   | -0.114928393 | 0.029013317 | 0.048636381 |
| RTN4RL2   | -0.114874942 | 0.029088627 | 0.048758523 |
| SYNGR1    | 0.114868374  | 0.029097893 | 0.048769949 |
| DNAJC4    | 0.114865958  | 0.029101302 | 0.048771559 |
| C20orf56  | -0.114848694 | 0.029125672 | 0.048808293 |
| RHBDL1    | 0.114815981  | 0.029171896 | 0.048881642 |
| CD300LF   | 0.114810879  | 0.02917911  | 0.048889616 |
| PGM1      | -0.114803414 | 0.029189669 | 0.048903194 |
| GNPNAT1   | -0.11480014  | 0.029194302 | 0.048906841 |
| CCL21     | -0.114793291 | 0.029203994 | 0.048918962 |
| MLLT3     | -0.11477368  | 0.029231761 | 0.048961356 |
| VIP       | -0.114766793 | 0.029241518 | 0.04897358  |
| PAG1      | -0.114742    | 0.029276665 | 0.049028319 |
| ADAMTS6   | -0.114728649 | 0.029295607 | 0.049055916 |
| BAAT      | -0.114711068 | 0.029320565 | 0.049093581 |
| NCRNA0009 | -0.114688884 | 0.029352084 | 0.049142223 |
| KCNK4     | -0.114565664 | 0.029527685 | 0.049432066 |
| TMEM125   | -0.114560561 | 0.029534977 | 0.049440116 |
| C8orf51   | 0.114537912  | 0.029567358 | 0.049490161 |
| NUS1      | -0.114533822 | 0.029573209 | 0.049495795 |
| RFPL3     | -0.114526827 | 0.029583218 | 0.049508385 |
| CBLC      | 0.11449513   | 0.029628608 | 0.04958018  |
| RAB3IL1   | 0.114486277  | 0.029641295 | 0.049597244 |
| ODF3L2    | 0.114474804  | 0.029657745 | 0.049618067 |
| MED28     | 0.114474123  | 0.029658723 | 0.049618067 |
| GSPT1     | -0.114449621 | 0.029693881 | 0.049672636 |
| FEZ2      | -0.114446479 | 0.029698391 | 0.049672636 |
| SYT6      | -0.114446178 | 0.029698824 | 0.049672636 |
| TGS1      | -0.114438143 | 0.029710363 | 0.049687762 |
| LOC400931 | 0.11443545   | 0.029714231 | 0.04969006  |
| MAGEB2    | 0.114387306  | 0.029783458 | 0.049801642 |
| IL13RA2   | -0.114384756 | 0.029787128 | 0.049803598 |
| MRPS35    | 0.114359046  | 0.029824156 | 0.049861018 |

|           |              |             |             |
|-----------|--------------|-------------|-------------|
| IMPDH1    | 0.114357435  | 0.029826478 | 0.049861018 |
| SYT15     | -0.114315151 | 0.029887468 | 0.049958781 |
| CCDC66    | -0.114301383 | 0.029907349 | 0.049987819 |
| C7orf43   | -0.114298545 | 0.029911449 | 0.049990476 |
| NINJ1     | 0.114281285  | 0.029936393 | 0.050027966 |
| GATA4     | -0.114275651 | 0.029944539 | 0.050037379 |
| LOC399744 | -0.114202801 | 0.030050038 | 0.050209456 |
| C16orf87  | -0.114136642 | 0.030146124 | 0.050365777 |
| KIAA1324L | -0.114123778 | 0.030164838 | 0.050392815 |
| FAM55D    | -0.114067388 | 0.030246985 | 0.05052581  |
| GAS2L1    | -0.114010331 | 0.030330301 | 0.050660736 |
| LOC221710 | 0.114006022  | 0.030336601 | 0.050667009 |
| ZNF367    | -0.113966719 | 0.030394115 | 0.050758809 |
| CLEC5A    | -0.113961165 | 0.030402251 | 0.050768139 |
| KLC1      | -0.113955386 | 0.030410718 | 0.05077802  |
| CFH       | -0.113944973 | 0.030425978 | 0.050799242 |
| RUSC1     | 0.113938274  | 0.0304358   | 0.05081138  |
| MKL1      | -0.113926652 | 0.030452844 | 0.050835574 |
| MMP20     | 0.113905738  | 0.030483539 | 0.050882548 |
| KCNT1     | -0.113870479 | 0.030535344 | 0.050964749 |
| ZBTB40    | -0.113839163 | 0.030581421 | 0.051037375 |
| C9orf173  | -0.113836997 | 0.03058461  | 0.05103842  |
| PASK      | -0.11381767  | 0.030613078 | 0.051081647 |
| ZNF334    | -0.113768274 | 0.030685942 | 0.051198938 |
| SLC25A44  | -0.113733815 | 0.030736859 | 0.051279597 |
| CHST7     | -0.113723335 | 0.030752358 | 0.051301157 |
| FKBP1A1   | -0.113672239 | 0.030828025 | 0.051423077 |
| IGSF1     | 0.113659292  | 0.030847223 | 0.051450792 |
| C1orf216  | 0.113652981  | 0.030856584 | 0.051462095 |
| ZNF321    | 0.113631999  | 0.030887727 | 0.051509721 |
| HSPA9     | -0.113598739 | 0.030937147 | 0.051587816 |
| DHX57     | 0.113585107  | 0.030957422 | 0.051617303 |
| ZIC2      | 0.113582564  | 0.030961207 | 0.051619291 |
| SNHG3-RC  | -0.113579565 | 0.030965669 | 0.051622409 |
| PPP2R4    | 0.113548117  | 0.031012497 | 0.051696147 |
| ASMTL     | -0.113542645 | 0.031020651 | 0.051705412 |
| C15orf51  | -0.113532322 | 0.031036039 | 0.051726731 |
| SERPINA4  | 0.113505076  | 0.031076685 | 0.05179014  |
| LOC646762 | -0.113485699 | 0.031105618 | 0.05183402  |
| HOMER1    | -0.113461856 | 0.031141252 | 0.051889059 |
| RSPH6A    | 0.113448349  | 0.031161455 | 0.051918378 |
| FAM127B   | 0.113424601  | 0.031197002 | 0.051973256 |
| HCG4P6    | 0.113416624  | 0.031208951 | 0.051988813 |
| FLJ44606  | 0.113397722  | 0.031237277 | 0.052030258 |
| MRGPRE    | -0.113395929 | 0.031239967 | 0.052030258 |
| C15orf32  | -0.113394793 | 0.031241669 | 0.052030258 |

|           |              |             |             |
|-----------|--------------|-------------|-------------|
| SSX3      | 0.11338411   | 0.031257691 | 0.05205259  |
| NCS1      | -0.113362003 | 0.031290868 | 0.052103482 |
| GPER      | 0.113356094  | 0.031299741 | 0.052113899 |
| 44089     | 0.113344022  | 0.031317876 | 0.052139734 |
| LOC100128 | -0.113338589 | 0.03132604  | 0.052148966 |
| ARID5B    | -0.113330433 | 0.031338299 | 0.052165014 |
| LOC389634 | 0.113322281  | 0.031350557 | 0.052181056 |
| RFC1      | -0.113311856 | 0.031366237 | 0.052202792 |
| DYDC1     | 0.113306836  | 0.031373791 | 0.052211    |
| ADRA1D    | 0.113296493  | 0.031389358 | 0.052232541 |
| KCNJ6     | -0.113279505 | 0.031414942 | 0.052270747 |
| DGKD      | -0.113277579 | 0.031417844 | 0.052271208 |
| ITGB6     | -0.113256407 | 0.031449755 | 0.052317044 |
| OTC       | -0.113255815 | 0.031450648 | 0.052317044 |
| SPIN2A    | -0.113251111 | 0.031457743 | 0.052324475 |
| TDRKH     | 0.113215416  | 0.031511619 | 0.052409713 |
| GPR150    | -0.113200439 | 0.031534249 | 0.052442969 |
| PRLHR     | 0.113194771  | 0.031542816 | 0.052452838 |
| GFAP      | -0.113190901 | 0.031548666 | 0.052458186 |
| LPA       | -0.113188276 | 0.031552636 | 0.052460406 |
| LOC285456 | -0.113171706 | 0.031577701 | 0.052497697 |
| GALNS     | -0.113161006 | 0.031593895 | 0.052520236 |
| KYNU      | 0.113144898  | 0.031618288 | 0.052556397 |
| METRNL    | -0.113139452 | 0.031626538 | 0.052565724 |
| KRT7      | -0.113136218 | 0.03163144  | 0.052569484 |
| CNTN1     | -0.113123289 | 0.031651037 | 0.052597663 |
| GEMIN4    | 0.113114648  | 0.03166414  | 0.052612712 |
| SLC38A9   | 0.113113833  | 0.031665376 | 0.052612712 |
| ZNF687    | -0.113085812 | 0.031707902 | 0.052678974 |
| KIAA2013  | 0.113076482  | 0.031722072 | 0.052698121 |
| BPIL2     | -0.113071922 | 0.031728999 | 0.052705232 |
| SLC26A9   | -0.113068741 | 0.031733834 | 0.052708865 |
| PGLYRP2   | -0.11305691  | 0.031751816 | 0.052729963 |
| TAGLN2    | 0.1130569    | 0.031751831 | 0.052729963 |
| LRRC66    | -0.112967787 | 0.031887555 | 0.052950943 |
| ABCA11P   | 0.112960115  | 0.031899264 | 0.05296597  |
| TNR       | -0.112919864 | 0.03196075  | 0.05306344  |
| LTA       | 0.1129182    | 0.031963295 | 0.05306344  |
| SLC44A3   | 0.112886566  | 0.032011693 | 0.053139356 |
| OXCT2     | 0.112883892  | 0.032015786 | 0.053141722 |
| AKAP1     | -0.112867784 | 0.032040456 | 0.053178238 |
| SPATA22   | -0.11286585  | 0.03204342  | 0.053178726 |
| TATDN2    | 0.112863796  | 0.032046567 | 0.053179517 |
| FLT3LG    | 0.112840905  | 0.03208166  | 0.053233316 |
| OR3A1     | 0.112835255  | 0.032090327 | 0.053243261 |
| ALOX15    | -0.112801081 | 0.032142791 | 0.053325864 |

|           |              |             |             |
|-----------|--------------|-------------|-------------|
| GATSL3    | -0.112767688 | 0.032194126 | 0.053406583 |
| MMD2      | 0.112753562  | 0.032215862 | 0.053438189 |
| MARVELD3  | -0.112707291 | 0.032287152 | 0.05355198  |
| SENP5     | -0.112701147 | 0.032296628 | 0.053563236 |
| TBX18     | -0.112690699 | 0.032312749 | 0.05358551  |
| PABPC3    | -0.112667268 | 0.032348923 | 0.053641033 |
| IQGAP3    | 0.112658211  | 0.032362916 | 0.053659768 |
| C8orf75   | -0.112646651 | 0.032380783 | 0.053684923 |
| ADHFE1    | -0.112634479 | 0.032399606 | 0.053711659 |
| MDGA1     | -0.112631246 | 0.032404606 | 0.053715477 |
| FLJ37453  | 0.112618242  | 0.032424729 | 0.053744359 |
| RPL29P2   | 0.112600184  | 0.032452688 | 0.053786225 |
| LOC100130 | 0.112586774  | 0.032473464 | 0.05381618  |
| SCN3B     | -0.112571602 | 0.032496983 | 0.053850676 |
| FAM23A    | -0.112563207 | 0.032510004 | 0.05386777  |
| TREML2    | -0.112546968 | 0.032535203 | 0.053905039 |
| CD207     | -0.112527697 | 0.032565127 | 0.05395013  |
| CDKL4     | 0.112517732  | 0.03258061  | 0.053971291 |
| PPAT      | -0.112506823 | 0.032597568 | 0.053994891 |
| ADRBK1    | -0.112500969 | 0.032606671 | 0.054005477 |
| ZNF547    | 0.112492994  | 0.032619076 | 0.054021529 |
| FOXD1     | 0.11249021   | 0.032623407 | 0.05402421  |
| 44075     | 0.112448067  | 0.032689031 | 0.054125611 |
| C10orf91  | 0.112447397  | 0.032690076 | 0.054125611 |
| PCMT1     | 0.11243252   | 0.032713269 | 0.054159511 |
| DIRC1     | -0.112393328 | 0.032774437 | 0.054256268 |
| PPY       | 0.112384528  | 0.032788184 | 0.054271045 |
| RNASE13   | -0.112384126 | 0.032788813 | 0.054271045 |
| ZNF845    | -0.11237444  | 0.032803951 | 0.054291588 |
| CPE       | -0.112364591 | 0.03281935  | 0.05431256  |
| MED31     | 0.112346105  | 0.032848268 | 0.0543559   |
| CNGA1     | -0.112333208 | 0.032868457 | 0.054384789 |
| LAMP1     | -0.112329932 | 0.032873587 | 0.054388759 |
| C3orf38   | -0.112309817 | 0.0329051   | 0.05443546  |
| CRISP1    | 0.112308426  | 0.032907281 | 0.05443546  |
| IL19      | 0.112297958  | 0.032923692 | 0.054458083 |
| 44086     | 0.112294623  | 0.032928921 | 0.054462209 |
| CHRNA3    | -0.112269508 | 0.032968328 | 0.054522857 |
| SCRT1     | 0.112266307  | 0.032973353 | 0.05452664  |
| PHC1      | -0.112248594 | 0.033001174 | 0.054568114 |
| C6orf105  | -0.11220962  | 0.033062458 | 0.054664911 |
| RELN      | 0.112198449  | 0.033080041 | 0.054689442 |
| IFIT1     | -0.112170178 | 0.033124576 | 0.054758523 |
| PCDHA7    | -0.11215421  | 0.033149753 | 0.054795595 |
| C10orf137 | -0.112130271 | 0.033187528 | 0.054853484 |
| APH1B     | -0.11209115  | 0.033249339 | 0.054951085 |

|           |              |             |             |
|-----------|--------------|-------------|-------------|
| PDZD7     | 0.112084603  | 0.033259693 | 0.054963637 |
| HIF1AN    | 0.11207863   | 0.033269141 | 0.05497308  |
| STL       | -0.112077501 | 0.033270928 | 0.05497308  |
| DCAF15    | 0.112052088  | 0.033311155 | 0.05503498  |
| IFFO1     | 0.112049392  | 0.033315424 | 0.055037468 |
| NOX1      | 0.112046481  | 0.033320035 | 0.055040519 |
| CALCA     | 0.112017804  | 0.033365489 | 0.055111032 |
| BEGAIN    | -0.112004025 | 0.033387348 | 0.055142565 |
| POLE      | -0.111985052 | 0.033417467 | 0.055187731 |
| GPAM      | -0.111954175 | 0.033466532 | 0.055264178 |
| GPR101    | -0.111928919 | 0.033506711 | 0.055325938 |
| ABHD8     | 0.11189808   | 0.033555827 | 0.055402445 |
| MRGPRF    | -0.111888801 | 0.033570617 | 0.05542227  |
| POU4F3    | -0.111861178 | 0.03361468  | 0.055490414 |
| RNF121    | 0.111852532  | 0.033628483 | 0.055508598 |
| C5orf54   | 0.11183439   | 0.033657458 | 0.055551821 |
| CD1C      | -0.11182336  | 0.033675086 | 0.05557631  |
| HCP5      | -0.111813537 | 0.03369079  | 0.055597621 |
| RFTN2     | -0.111797669 | 0.033716173 | 0.055634898 |
| LOC100130 | -0.111777832 | 0.033747929 | 0.055682685 |
| LRRC27    | 0.111769906  | 0.033760623 | 0.055699015 |
| ANAPC4    | 0.111744277  | 0.033801701 | 0.055759581 |
| OR7E91P   | -0.111743508 | 0.033802934 | 0.055759581 |
| DSCR10    | 0.111731548  | 0.033822119 | 0.055786607 |
| BCMO1     | -0.111712052 | 0.03385341  | 0.055833596 |
| ORC5L     | 0.111707988  | 0.033859936 | 0.055839735 |
| STX18     | 0.111693879  | 0.033882601 | 0.055872485 |
| HOXA11AS  | 0.111650137  | 0.033952951 | 0.055983856 |
| INHA      | 0.111636143  | 0.033975483 | 0.056016371 |
| SFRP5     | -0.111619766 | 0.034001869 | 0.056055233 |
| PNPLA4    | -0.111601496 | 0.034031325 | 0.05609915  |
| VAV3      | -0.1115901   | 0.03404971  | 0.056124812 |
| TDPI      | 0.111567586  | 0.034086055 | 0.056180069 |
| LEP       | -0.111562816 | 0.03409376  | 0.056188118 |
| PAR4      | -0.111548673 | 0.034116612 | 0.056221128 |
| RTP3      | -0.111535753 | 0.0341375   | 0.056250895 |
| COMP      | -0.111496952 | 0.034200297 | 0.056349707 |
| BEND3     | 0.111470314  | 0.034243466 | 0.056416167 |
| UGT2B28   | -0.111463477 | 0.034254552 | 0.056429763 |
| PTPRO     | -0.111448932 | 0.03427815  | 0.056463966 |
| RPRM      | 0.111411766  | 0.034338508 | 0.056558713 |
| RPS4Y1    | 0.111406641  | 0.034346838 | 0.056567754 |
| LOC100101 | 0.111404629  | 0.03435011  | 0.056568464 |
| CTDSP1    | 0.111391742  | 0.034371066 | 0.056598295 |
| ULBP1     | -0.111386566 | 0.034379485 | 0.056607478 |
| PRKCD     | 0.111380272  | 0.034389726 | 0.056617988 |

|           |              |             |             |
|-----------|--------------|-------------|-------------|
| CRYGD     | 0.111379149  | 0.034391554 | 0.056617988 |
| CCDC64    | -0.111293241 | 0.034531601 | 0.056843845 |
| GTF3C1    | -0.111207993 | 0.034671052 | 0.057064977 |
| KSR2      | -0.111207525 | 0.034671819 | 0.057064977 |
| DAZAP2    | -0.11120587  | 0.034674531 | 0.057064977 |
| PIGQ      | 0.111198256  | 0.03468701  | 0.057080797 |
| HOXB7     | 0.111193753  | 0.034694393 | 0.057088228 |
| KIAA1614  | -0.111154926 | 0.034758103 | 0.057185644 |
| OSM       | -0.111154173 | 0.034759338 | 0.057185644 |
| HSPB8     | -0.111151104 | 0.03476438  | 0.057189213 |
| RXRA      | -0.111139645 | 0.034783203 | 0.057215452 |
| PPPDE1    | -0.111124013 | 0.034808896 | 0.057252987 |
| VKORC1    | 0.111114551  | 0.034824456 | 0.05727385  |
| LOC338799 | 0.111094187  | 0.034857965 | 0.057324226 |
| ZNF415    | -0.111051709 | 0.034927949 | 0.057434572 |
| LETM2     | -0.11103686  | 0.034952442 | 0.057470102 |
| GNG7      | -0.11101841  | 0.034982894 | 0.057515425 |
| MTCP1NB   | 0.111013901  | 0.03499034  | 0.057522917 |
| HPSE2     | 0.111009495  | 0.034997618 | 0.057530133 |
| MGC12916  | 0.110986268  | 0.035036001 | 0.057588475 |
| ERMN      | -0.110976064 | 0.035052873 | 0.057611453 |
| RER1      | 0.110971887  | 0.035059784 | 0.057618055 |
| HSD11B1L  | 0.110961838  | 0.035076409 | 0.057640621 |
| CDC42SE2  | -0.110950739 | 0.035094782 | 0.057664573 |
| AP2A1     | -0.110949535 | 0.035096776 | 0.057664573 |
| DUSP4     | -0.110917296 | 0.035150189 | 0.057741588 |
| PEPD      | -0.110916047 | 0.03515226  | 0.057741588 |
| CCT6B     | -0.110915994 | 0.035152348 | 0.057741588 |
| ZNF442    | -0.110873234 | 0.035223303 | 0.057853367 |
| SNORA80   | 0.110845273  | 0.035269766 | 0.057924904 |
| FAM154B   | -0.110794278 | 0.035354639 | 0.058059506 |
| HEATR6    | -0.110759146 | 0.035413213 | 0.058150901 |
| JSRP1     | 0.110734031  | 0.035455135 | 0.058214941 |
| NEFL      | -0.110716266 | 0.035484815 | 0.058258871 |
| PITX1     | 0.110709672  | 0.035495838 | 0.058272163 |
| FBXO45    | 0.110693224  | 0.035523342 | 0.058312509 |
| INTS4     | 0.110638256  | 0.035615394 | 0.058458796 |
| HOXA5     | -0.110590316 | 0.035695842 | 0.058586014 |
| KIAA1598  | -0.110582589 | 0.035708824 | 0.058602492 |
| CYP2R1    | 0.110503768  | 0.03584147  | 0.058815332 |
| RUNDC3B   | -0.110484079 | 0.03587467  | 0.058864962 |
| APOL1     | -0.110464889 | 0.035907052 | 0.058913243 |
| CRYZ      | -0.110453427 | 0.035926405 | 0.05894014  |
| ARHGEF2   | 0.110426013  | 0.035972732 | 0.059011281 |
| SYTL3     | -0.110412617 | 0.035995387 | 0.059043583 |
| BAGE2     | -0.110404402 | 0.036009286 | 0.059054798 |



|           |              |             |             |
|-----------|--------------|-------------|-------------|
| LPPR3     | -0.110403968 | 0.036010021 | 0.059054798 |
| ACSM2A    | -0.110403318 | 0.036011121 | 0.059054798 |
| SCN1A     | 0.110394814  | 0.036025515 | 0.059072413 |
| FAM138B   | 0.110393467  | 0.036027794 | 0.059072413 |
| CYP4F12   | 0.110359869  | 0.036084712 | 0.059160866 |
| C7orf33   | 0.110332739  | 0.03613073  | 0.059231436 |
| SENP8     | -0.110327394 | 0.036139801 | 0.059241431 |
| C21orf58  | 0.110315877  | 0.036159356 | 0.059268607 |
| FCGR1B    | 0.110295731  | 0.036193581 | 0.059319823 |
| SNRNP27   | -0.110271251 | 0.036235206 | 0.059383158 |
| RFPL3S    | 0.110264774  | 0.036246227 | 0.059396332 |
| NAPB      | 0.110232876  | 0.036300541 | 0.059480441 |
| TMSL3     | 0.110223492  | 0.036316534 | 0.05950175  |
| SPRYD5    | -0.110203893 | 0.036349953 | 0.059551606 |
| CDSN      | -0.110197111 | 0.036361523 | 0.059563477 |
| SH3KBP1   | -0.110196139 | 0.036363181 | 0.059563477 |
| C8G       | 0.110192248  | 0.036369821 | 0.059569453 |
| GABRA2    | 0.110156662  | 0.036430595 | 0.059664088 |
| HMGA2     | 0.110144142  | 0.036451998 | 0.059694231 |
| FABP4     | -0.110128953 | 0.036477977 | 0.059731863 |
| SSTR1     | -0.110115033 | 0.036501798 | 0.059765955 |
| TSPY3     | 0.110080386  | 0.036561151 | 0.059858214 |
| TAF8      | 0.110077062  | 0.036566849 | 0.059862622 |
| RASSF10   | -0.110073501 | 0.036572954 | 0.059867694 |
| ABCG2     | -0.110018767 | 0.036666909 | 0.06001656  |
| MUC2      | -0.110008886 | 0.036683891 | 0.060039422 |
| LOC647946 | 0.109954021  | 0.036778312 | 0.060189012 |
| TMEM144   | -0.109943074 | 0.036797176 | 0.060214935 |
| PTK7      | -0.109910592 | 0.036853197 | 0.060301653 |
| BAG3      | -0.109885127 | 0.036897169 | 0.060368643 |
| CYB5B     | 0.10986612   | 0.036930017 | 0.060417422 |
| TMEM206   | 0.109849514  | 0.036958735 | 0.060459438 |
| CNTNAP2   | -0.109839059 | 0.036976826 | 0.060484065 |
| GDEP      | 0.109786159  | 0.037068478 | 0.060629002 |
| TCAM1P    | 0.109783586  | 0.03707294  | 0.060631322 |
| CYFIP2    | -0.10976887  | 0.037098473 | 0.060668098 |
| C17orf71  | -0.109765321 | 0.037104634 | 0.06067319  |
| IER5L     | 0.10973159   | 0.037163224 | 0.060764006 |
| STH       | 0.10971859   | 0.037185824 | 0.060795968 |
| KLK10     | -0.10966074  | 0.037286542 | 0.06095563  |
| CTAGE9    | -0.109645112 | 0.03731379  | 0.060995168 |
| TARP      | -0.109641279 | 0.037320476 | 0.06100109  |
| LOC220930 | -0.109625764 | 0.037347549 | 0.061040332 |
| TEAD3     | 0.109610468  | 0.037374255 | 0.061078967 |
| WNT4      | -0.109606986 | 0.037380336 | 0.061083892 |
| TREH      | -0.109598233 | 0.037395628 | 0.061103867 |

|           |              |             |             |
|-----------|--------------|-------------|-------------|
| XKR5      | -0.109571525 | 0.03744232  | 0.061175142 |
| ADH4      | -0.109507212 | 0.037554959 | 0.061354143 |
| CNDP2     | -0.109501644 | 0.037564724 | 0.061365063 |
| KLF14     | 0.109498747  | 0.037569806 | 0.06136833  |
| LOC145837 | -0.109462448 | 0.037633529 | 0.061467377 |
| C20orf132 | -0.109449329 | 0.037656581 | 0.061499985 |
| INPP1     | -0.109444259 | 0.037665494 | 0.061509497 |
| PRAMEF2   | -0.109442493 | 0.037668599 | 0.061509523 |
| C15orf27  | 0.109427821  | 0.0376944   | 0.061546608 |
| LIMK2     | -0.109416815 | 0.037713766 | 0.06157318  |
| ATP8B3    | -0.109381976 | 0.037775123 | 0.061668298 |
| RTN4R     | -0.1093496   | 0.037832217 | 0.061751451 |
| RDH11     | -0.109349576 | 0.03783226  | 0.061751451 |
| SLC12A5   | 0.109331882  | 0.037863492 | 0.061795319 |
| LPIN3     | -0.109330447 | 0.037866028 | 0.061795319 |
| GDAP1     | 0.109329078  | 0.037868444 | 0.061795319 |
| tAKR      | -0.109316749 | 0.037890224 | 0.061825794 |
| TPTE      | 0.109309161  | 0.037903633 | 0.061842606 |
| TOP3B     | 0.109288054  | 0.037940953 | 0.061898426 |
| SCEL      | -0.109268669 | 0.037975256 | 0.061949314 |
| TMEM30C   | 0.109253647  | 0.038001857 | 0.061987631 |
| TSPAN9    | -0.109197659 | 0.038101139 | 0.062144486 |
| HOXC13    | 0.109172347  | 0.038146094 | 0.062211466 |
| ZNF491    | -0.109171021 | 0.038148452 | 0.062211466 |
| AMACR     | -0.109169179 | 0.038151725 | 0.062211709 |
| CT62      | -0.109156394 | 0.038174453 | 0.062243674 |
| ATP6V0A2  | -0.109151163 | 0.038183755 | 0.062253744 |
| KCNT2     | -0.109141987 | 0.038200077 | 0.062275257 |
| B3GALT2   | -0.109131342 | 0.03821902  | 0.062301038 |
| ITIH1     | 0.10911215   | 0.038253191 | 0.062351637 |
| PLD5      | -0.109069131 | 0.038329882 | 0.062471529 |
| DNAJB3    | -0.109042012 | 0.038378296 | 0.062545317 |
| TMEM119   | -0.109039447 | 0.038382877 | 0.062547663 |
| CRAT      | -0.109035373 | 0.038390156 | 0.062554406 |
| GPR132    | -0.109021695 | 0.038414599 | 0.062589114 |
| C21orf29  | -0.10901383  | 0.038428661 | 0.062606903 |
| HDAC8     | 0.109003441  | 0.038447242 | 0.062628273 |
| TMEM229B  | -0.10900298  | 0.038448067 | 0.062628273 |
| ZIK1      | -0.108979628 | 0.03848986  | 0.062687167 |
| SOST      | -0.10897926  | 0.038490518 | 0.062687167 |
| C2orf66   | -0.108965266 | 0.038515583 | 0.062722859 |
| PPM1J     | -0.108951063 | 0.038541035 | 0.062759176 |
| PCK2      | -0.108922451 | 0.038592353 | 0.062837601 |
| DTX3L     | -0.108886387 | 0.038657119 | 0.062937911 |
| RNF212    | -0.108872178 | 0.038682662 | 0.062974349 |
| PIGX      | 0.108863885  | 0.038697575 | 0.062993478 |

|           |              |             |             |
|-----------|--------------|-------------|-------------|
| PTGFRN    | -0.108854274 | 0.038714867 | 0.063016475 |
| BOLL      | 0.108793169  | 0.03882495  | 0.063190494 |
| CACNB3    | -0.108774303 | 0.038858992 | 0.063240731 |
| TNFRSF1B  | -0.10876822  | 0.038869973 | 0.063253433 |
| LRFN4     | -0.108737644 | 0.038925211 | 0.063338147 |
| ALDH3B2   | -0.108716919 | 0.03896269  | 0.063393952 |
| LOC100128 | -0.108704418 | 0.038985313 | 0.063425578 |
| C22orf29  | 0.108665317  | 0.03905614  | 0.063535617 |
| C3orf62   | 0.10861157   | 0.039153676 | 0.063687387 |
| GUCY1B2   | 0.108610384  | 0.039155831 | 0.063687387 |
| PGF       | 0.108593078  | 0.039187281 | 0.063733337 |
| CYBB      | -0.10858445  | 0.03920297  | 0.063753646 |
| LINGO3    | -0.108579211 | 0.039212498 | 0.063763933 |
| ADAMTSL4  | -0.108550821 | 0.039264166 | 0.063842739 |
| TTL       | -0.108543624 | 0.039277273 | 0.063858836 |
| SIRPG     | 0.108524931  | 0.039311334 | 0.063908998 |
| DVWA      | 0.108511701  | 0.039335457 | 0.063942995 |
| KLC3      | 0.10848527   | 0.039383685 | 0.064016168 |
| ANAPC10   | -0.108477103 | 0.039398598 | 0.064035181 |
| CES3      | -0.108474773 | 0.039402854 | 0.064036872 |
| DAK       | -0.108451266 | 0.039445807 | 0.064101449 |
| NKAPL     | -0.108441295 | 0.039464037 | 0.064125841 |
| NLGN4Y    | -0.108430977 | 0.039482912 | 0.064151276 |
| BIN2      | -0.108400475 | 0.03953875  | 0.06423676  |
| CYP26C1   | -0.108359248 | 0.039614327 | 0.064354296 |
| DEDD      | 0.108354888  | 0.039622328 | 0.064358368 |
| GCNT3     | 0.10835436   | 0.039623297 | 0.064358368 |
| DNAH12    | 0.108343201  | 0.039643777 | 0.064386383 |
| SNORA65   | 0.108305733  | 0.039712612 | 0.06449292  |
| HES7      | 0.108303606  | 0.039716524 | 0.064494013 |
| ODC1      | 0.108300491  | 0.039722252 | 0.064498055 |
| FAM150A   | -0.108278848 | 0.039762068 | 0.06455209  |
| PLEKHM2   | -0.108277457 | 0.039764629 | 0.06455209  |
| CHIC2     | -0.108277046 | 0.039765384 | 0.06455209  |
| TOX3      | 0.108275356  | 0.039768496 | 0.06455209  |
| TMEM74    | 0.108256889  | 0.0398025   | 0.064602019 |
| FAM90A1   | 0.108196524  | 0.039913826 | 0.064777431 |
| SERPINA1  | 0.108191212  | 0.039923635 | 0.064785954 |
| GPX5      | 0.108190157  | 0.039925584 | 0.064785954 |
| HAR1A     | -0.108186567 | 0.039932215 | 0.064791434 |
| TPTE2P3   | 0.108168938  | 0.039964788 | 0.064839003 |
| HOXC10    | 0.108164039  | 0.039973846 | 0.064842446 |
| CA3       | -0.108162712 | 0.039976298 | 0.064842446 |
| CRB3      | 0.108162507  | 0.039976678 | 0.064842446 |
| KIAA0406  | -0.108159014 | 0.039983136 | 0.06484562  |
| ESPN      | 0.108157926  | 0.039985148 | 0.06484562  |

|           |              |             |             |
|-----------|--------------|-------------|-------------|
| KAZALD1   | 0.108141838  | 0.040014908 | 0.064888599 |
| MCM3AP    | -0.108121347 | 0.040052838 | 0.064944819 |
| DHX8      | -0.10811257  | 0.040069094 | 0.064965888 |
| SLC25A31  | 0.108099962  | 0.040092456 | 0.064998475 |
| PPAP2C    | 0.10808793   | 0.040114761 | 0.065027466 |
| MEGF11    | -0.108086793 | 0.040116869 | 0.065027466 |
| TESK1     | 0.108069635  | 0.040148696 | 0.065073759 |
| ZNF222    | 0.108050359  | 0.040184478 | 0.065126455 |
| DPP4      | -0.108030087 | 0.040222138 | 0.065182186 |
| OR1L6     | 0.108027641  | 0.040226684 | 0.065184248 |
| RHCG      | -0.108011784 | 0.040256164 | 0.065226712 |
| COQ9      | -0.107994403 | 0.040288501 | 0.065273795 |
| FADS3     | 0.107985205  | 0.04030562  | 0.065296219 |
| LOC732275 | 0.107978464  | 0.040318172 | 0.065311241 |
| LIPC      | 0.107961844  | 0.040349132 | 0.065356077 |
| CD40LG    | -0.107937544 | 0.040394434 | 0.065419846 |
| C14orf129 | -0.107937202 | 0.040395071 | 0.065419846 |
| GPR143    | -0.107923084 | 0.040421412 | 0.065457182 |
| PPFIA4    | 0.107908124  | 0.040449339 | 0.06549708  |
| FAM100A   | 0.107870942  | 0.040518819 | 0.065604251 |
| WDR59     | -0.107848379 | 0.04056103  | 0.065667255 |
| MYOM1     | 0.107820455  | 0.040613323 | 0.065746571 |
| ZNF501    | -0.10781657  | 0.040620603 | 0.065753012 |
| PRL       | 0.107785077  | 0.040679657 | 0.065843251 |
| UTF1      | 0.107775234  | 0.040698128 | 0.065867794 |
| PCDH20    | -0.10776322  | 0.040720683 | 0.065898943 |
| KIAA1524  | 0.107758127  | 0.040730248 | 0.065907935 |
| KRTAP19-3 | 0.107756738  | 0.040732858 | 0.065907935 |
| ZFYVE21   | -0.107746602 | 0.040751901 | 0.06593339  |
| C6orf182  | -0.107708373 | 0.040823788 | 0.066044333 |
| CAMK2N1   | 0.107696343  | 0.040846433 | 0.066075601 |
| CD27      | 0.107665615  | 0.040904321 | 0.066163869 |
| RFX2      | -0.107639724 | 0.04095315  | 0.066237471 |
| WFDC5     | -0.107548528 | 0.041125535 | 0.066507628 |
| MSX1      | 0.107547828  | 0.041126861 | 0.066507628 |
| CD44      | -0.107517336 | 0.041184636 | 0.06659565  |
| PLAC9     | 0.107492168  | 0.041232377 | 0.066667434 |
| AMZ1      | -0.107452466 | 0.041307779 | 0.06677944  |
| FBXO32    | 0.107452162  | 0.041308357 | 0.06677944  |
| SLC2A7    | 0.107437241  | 0.041336726 | 0.066819878 |
| TMEM179   | -0.107377868 | 0.041449773 | 0.066997177 |
| CXorf27   | 0.107367972  | 0.04146864  | 0.067022234 |
| ZNF626    | -0.107363047 | 0.041478031 | 0.067031972 |
| NCOA5     | 0.10735515   | 0.041493096 | 0.067050877 |
| MLXIPL    | 0.10735335   | 0.04149653  | 0.067050986 |
| ZPBP2     | 0.107347635  | 0.041507436 | 0.067063166 |

|           |              |             |             |
|-----------|--------------|-------------|-------------|
| OXER1     | 0.107329687  | 0.041541701 | 0.067113082 |
| LRRC3B    | -0.107302086 | 0.04159444  | 0.067192835 |
| FOXRED1   | 0.107283074  | 0.041630801 | 0.067246119 |
| OR2AT4    | 0.107235289  | 0.041722307 | 0.067388463 |
| ENPP5     | -0.107230357 | 0.041731763 | 0.067397844 |
| GATA3     | -0.107228729 | 0.041734884 | 0.067397844 |
| CDH23     | -0.107200291 | 0.041789437 | 0.06748047  |
| BRAF      | -0.107189421 | 0.041810305 | 0.067508693 |
| NUP62     | 0.107182725  | 0.041823162 | 0.067523979 |
| CYTSB     | -0.107149471 | 0.041887073 | 0.067621682 |
| SMARCC2   | -0.107138269 | 0.041908623 | 0.067650986 |
| SLC19A3   | -0.107131604 | 0.041921448 | 0.067666204 |
| TNFAIP8   | -0.107108161 | 0.041966583 | 0.067733568 |
| DLGAP4    | 0.107099021  | 0.041984192 | 0.067756497 |
| KLC2      | -0.107071436 | 0.042037373 | 0.067836827 |
| SETD1A    | -0.107058659 | 0.042062025 | 0.067871108 |
| GZMB      | 0.107025934  | 0.042125221 | 0.067967574 |
| JUB       | -0.107013464 | 0.042149324 | 0.06799777  |
| NEB       | -0.107012719 | 0.042150764 | 0.06799777  |
| VAC14     | 0.106986416  | 0.042201642 | 0.068074332 |
| AKR1B15   | 0.106980989  | 0.042212147 | 0.068085762 |
| TTBK1     | -0.106976914 | 0.042220035 | 0.06809075  |
| B4GALNT1  | 0.106974842  | 0.042224047 | 0.06809075  |
| DEF8      | 0.106974093  | 0.042225496 | 0.06809075  |
| TEX10     | 0.10696917   | 0.042235029 | 0.06809535  |
| SERPINB11 | 0.106969088  | 0.042235188 | 0.06809535  |
| C2orf77   | -0.106962799 | 0.042247369 | 0.068109476 |
| DNAJA4    | -0.10694769  | 0.042276644 | 0.068151154 |
| DSCR4     | 0.106919223  | 0.04233185  | 0.068234625 |
| KCNIP3    | -0.106915882 | 0.042338334 | 0.068239553 |
| SMYD2     | 0.106912945  | 0.042344033 | 0.068243216 |
| FAM83D    | 0.106890098  | 0.042388393 | 0.06830918  |
| RPL21P44  | -0.106861858 | 0.04244328  | 0.068392097 |
| PLEKHG7   | -0.106851005 | 0.042464389 | 0.068420576 |
| BMPR1B    | -0.106819835 | 0.042525066 | 0.068512798 |
| INE2      | 0.1068166    | 0.042531368 | 0.068517407 |
| LOC645676 | 0.106778545  | 0.042605553 | 0.068631368 |
| DDX19A    | -0.106756808 | 0.042647978 | 0.068694152 |
| RFPL4A    | -0.106744658 | 0.042671706 | 0.068726812 |
| ANXA13    | 0.106735542  | 0.042689518 | 0.068749939 |
| LOC388428 | 0.106670935  | 0.042815925 | 0.068947937 |
| CCDC148   | -0.106659532 | 0.042838268 | 0.068978339 |
| PRRT1     | -0.106648733 | 0.042859437 | 0.069006846 |
| TMEM191A  | 0.10664188   | 0.042872876 | 0.069022905 |
| CAPN14    | -0.106636619 | 0.042883194 | 0.069033935 |
| TMEM8A    | -0.106621161 | 0.042913526 | 0.069073038 |

|           |              |             |             |
|-----------|--------------|-------------|-------------|
| KRT86     | -0.106619855 | 0.042916089 | 0.069073038 |
| NR5A2     | -0.106618938 | 0.042917889 | 0.069073038 |
| SLC35F2   | -0.106573039 | 0.043008065 | 0.069212574 |
| PRSS21    | 0.106555328  | 0.043042905 | 0.069263046 |
| FTSJD2    | 0.106496887  | 0.04315803  | 0.069437463 |
| SNORD15A  | 0.106496006  | 0.043159768 | 0.069437463 |
| PELO      | 0.106494998  | 0.043161755 | 0.069437463 |
| C3orf57   | 0.106491728  | 0.043168205 | 0.06944223  |
| EXOC2     | -0.106457209 | 0.043236341 | 0.069546218 |
| NLRP5     | 0.106434615  | 0.043280988 | 0.069612412 |
| C9orf110  | -0.106397812 | 0.043353796 | 0.069723883 |
| FLJ13224  | -0.106374298 | 0.043400366 | 0.069793144 |
| GAL3ST2   | -0.106365442 | 0.043417917 | 0.069814979 |
| TMCO1     | 0.106363909  | 0.043420955 | 0.069814979 |
| DMWD      | 0.106344376  | 0.04345969  | 0.069871617 |
| PSMA8     | 0.106338796  | 0.043470761 | 0.069883775 |
| VSX2      | 0.106325117  | 0.043497911 | 0.069917052 |
| NPC1L1    | 0.106324829  | 0.043498482 | 0.069917052 |
| BRDT      | 0.106322338  | 0.043503427 | 0.069919356 |
| GPR37L1   | 0.106315958  | 0.043516095 | 0.069934072 |
| CHRDL2    | 0.106274969  | 0.04359756  | 0.070059341 |
| CCDC103   | 0.106267407  | 0.043612604 | 0.07007786  |
| GPR123    | -0.106241024 | 0.043665124 | 0.07015659  |
| UXS1      | 0.106238698  | 0.043669756 | 0.070158372 |
| LRRC31    | -0.10622314  | 0.043700754 | 0.070200919 |
| CBLN2     | -0.106221868 | 0.043703289 | 0.070200919 |
| ENC1      | -0.106186532 | 0.043773764 | 0.070308454 |
| WTAP      | -0.106183466 | 0.043779885 | 0.070312614 |
| SCAND3    | -0.106181094 | 0.04378462  | 0.070314548 |
| METT10D   | 0.10616345   | 0.043819852 | 0.070362672 |
| CSTF2     | 0.106162549  | 0.043821653 | 0.070362672 |
| C9orf163  | -0.106153358 | 0.043840016 | 0.070381038 |
| FEM1A     | -0.106153286 | 0.04384016  | 0.070381038 |
| GOLGA6L6  | 0.106116193  | 0.043914338 | 0.070494441 |
| SLC7A6    | 0.10608894   | 0.043968904 | 0.070576346 |
| CCDC6     | -0.106062675 | 0.044021547 | 0.07065515  |
| SIPA1L2   | -0.106060631 | 0.044025647 | 0.070656037 |
| LOC400794 | 0.106050088  | 0.044046793 | 0.070684278 |
| KERA      | -0.10603721  | 0.044072637 | 0.070720052 |
| C14orf147 | -0.106031    | 0.044085104 | 0.070734358 |
| ASGR2     | 0.10601652   | 0.044114183 | 0.070775313 |
| LRIT1     | 0.10599456   | 0.044158317 | 0.070840413 |
| SEMA4D    | -0.10597995  | 0.0441877   | 0.07088184  |
| ALAS2     | -0.10595853  | 0.044230807 | 0.070943913 |
| C21orf131 | 0.105957182  | 0.044233521 | 0.070943913 |
| C1orf150  | -0.10595265  | 0.044242646 | 0.070952834 |

|           |              |             |             |
|-----------|--------------|-------------|-------------|
| MLH1      | -0.105948727 | 0.044250547 | 0.070959791 |
| FREM1     | -0.105920266 | 0.0443079   | 0.071046042 |
| AKR7L     | -0.105917825 | 0.044312823 | 0.071048214 |
| FNTB      | 0.105868683  | 0.044412008 | 0.071201509 |
| LOC407835 | 0.105863654  | 0.044422169 | 0.071212065 |
| HTR3E     | 0.105844504  | 0.044460877 | 0.071268381 |
| OR4F5     | -0.105836805 | 0.044476449 | 0.071287605 |
| NMNAT1    | -0.105819901 | 0.04451065  | 0.071336681 |
| REG3G     | 0.105745486  | 0.044661482 | 0.071572657 |
| RAB3C     | 0.105741578  | 0.044669416 | 0.071579611 |
| TMCC2     | -0.10569906  | 0.044755801 | 0.071712267 |
| POLB      | 0.105648074  | 0.044859575 | 0.071872763 |
| MS4A6E    | -0.105641787 | 0.044872385 | 0.071887503 |
| LOC25845  | 0.105637716  | 0.044880682 | 0.071895012 |
| PNMAL1    | -0.105627934 | 0.044900623 | 0.071921169 |
| ENPP3     | 0.105590418  | 0.044977168 | 0.07203429  |
| TAL2      | 0.105589776  | 0.044978478 | 0.07203429  |
| SERPINA12 | 0.105586124  | 0.044985937 | 0.072040442 |
| C6orf223  | 0.105565437  | 0.045028199 | 0.072100687 |
| C18orf54  | 0.105564165  | 0.045030798 | 0.072100687 |
| ARNT2     | -0.10555504  | 0.045049451 | 0.072124755 |
| FMO9P     | 0.105550504  | 0.045058728 | 0.072133808 |
| GNG10     | 0.105532896  | 0.045094747 | 0.072185667 |
| LRRC42    | 0.105524402  | 0.04511213  | 0.072207689 |
| TNRC18    | -0.105518129 | 0.045124973 | 0.072222442 |
| C19orf2   | 0.105514805  | 0.045131779 | 0.072227529 |
| MORC1     | -0.105478388 | 0.045206401 | 0.07234114  |
| TCF23     | -0.105474918 | 0.045213517 | 0.072346712 |
| ITGAM     | -0.105461254 | 0.045241548 | 0.072385749 |
| LRRC16A   | -0.105456699 | 0.045250895 | 0.072394889 |
| TAGLN3    | 0.105437227  | 0.045290871 | 0.072453024 |
| C4A       | 0.10543527   | 0.045294891 | 0.072453216 |
| ZYX       | 0.105433626  | 0.045298267 | 0.072453216 |
| DDO       | -0.105428015 | 0.045309793 | 0.072465831 |
| KLF15     | -0.105423931 | 0.045318184 | 0.072469528 |
| RASL11A   | -0.105423348 | 0.045319383 | 0.072469528 |
| LOC284661 | 0.105412095  | 0.045342511 | 0.07250069  |
| XKR8      | 0.105397603  | 0.04537231  | 0.072539463 |
| SLC16A9   | -0.10539676  | 0.045374044 | 0.072539463 |
| MAGEB1    | 0.105374587  | 0.045419672 | 0.07260658  |
| PVALB     | -0.105323231 | 0.045525501 | 0.072769913 |
| HMGB3     | 0.105308377  | 0.045556147 | 0.072813056 |
| APBB1     | 0.105297552  | 0.045578493 | 0.072842925 |
| RIMBP2    | -0.105287231 | 0.045599808 | 0.072871142 |
| FAM89A    | -0.105276136 | 0.045622729 | 0.072901922 |
| ZNF837    | -0.105261157 | 0.04565369  | 0.072945187 |

|           |              |             |             |
|-----------|--------------|-------------|-------------|
| SPINK13   | 0.105259493  | 0.04565713  | 0.072945187 |
| NRN1L     | 0.105225572  | 0.045727314 | 0.073051456 |
| TCFL5     | 0.105221459  | 0.04573583  | 0.073059201 |
| S100A8    | 0.105210434  | 0.045758666 | 0.073089816 |
| BTN2A1    | -0.105207063 | 0.045765648 | 0.073095107 |
| FAH       | 0.105200718  | 0.045778796 | 0.073110243 |
| CD72      | 0.105186474  | 0.045808323 | 0.073151531 |
| TKTL2     | 0.105127899  | 0.045929909 | 0.073339813 |
| MRGPRD    | -0.105105234 | 0.045977027 | 0.073409164 |
| LARS      | 0.105062827  | 0.046065298 | 0.073544205 |
| KCNS1     | -0.105050596 | 0.046090783 | 0.073578994 |
| KRTAP1-1  | -0.105035943 | 0.046121333 | 0.073621861 |
| MARK3     | -0.105031182 | 0.046131262 | 0.073631809 |
| LILRA3    | -0.105027746 | 0.046138429 | 0.073637346 |
| EXD1      | 0.105025173  | 0.046143796 | 0.073640011 |
| FAM5C     | 0.105021196  | 0.046152092 | 0.073647348 |
| C11orf57  | -0.104973977 | 0.046250702 | 0.073798793 |
| DNAJC1    | 0.104954141  | 0.04629218  | 0.073859058 |
| CDC42     | 0.10494943   | 0.046302035 | 0.073868863 |
| ANKRD46   | -0.104921655 | 0.046360175 | 0.073955694 |
| ZNF187    | 0.104897551  | 0.046410681 | 0.074030334 |
| MGC14436  | -0.104861062 | 0.046487224 | 0.07414649  |
| AHRR      | -0.104804281 | 0.046606546 | 0.074330853 |
| FOLH1     | -0.104793106 | 0.04663006  | 0.074362399 |
| AGT       | 0.104790173  | 0.046636233 | 0.074366288 |
| PARD6B    | -0.104776524 | 0.046664969 | 0.074406154 |
| PRSS53    | -0.1047732   | 0.04667197  | 0.074411358 |
| LRRC10B   | -0.104719966 | 0.046784202 | 0.074584325 |
| PPID      | -0.104673796 | 0.046881725 | 0.074733816 |
| TGM6      | -0.104651941 | 0.046927947 | 0.074801511 |
| LOC100130 | -0.104627901 | 0.046978836 | 0.074876632 |
| EFHB      | -0.10459275  | 0.047053327 | 0.074989356 |
| COG1      | 0.104582182  | 0.04707574  | 0.075019073 |
| IRX2      | -0.104576716 | 0.047087338 | 0.075031552 |
| C21orf129 | 0.104569166  | 0.04710336  | 0.075051077 |
| AHSG      | 0.104557082  | 0.047129014 | 0.075085945 |
| HSD17B14  | 0.104526364  | 0.047194278 | 0.07518391  |
| EMP2      | 0.104521077  | 0.047205521 | 0.075195804 |
| C5AR1     | -0.104486123 | 0.047279892 | 0.075308249 |
| IFFO2     | -0.104465468 | 0.047323885 | 0.075372295 |
| FANK1     | -0.104460337 | 0.047334821 | 0.075383684 |
| TARM1     | -0.104433553 | 0.047391931 | 0.075468599 |
| ARSF      | -0.104391582 | 0.047481541 | 0.075605252 |
| PPFIBP2   | -0.104385515 | 0.047494505 | 0.075619849 |
| CNN1      | -0.104378814 | 0.047508828 | 0.075636607 |
| MPEG1     | -0.104361572 | 0.0475457   | 0.075689258 |



|           |              |             |             |
|-----------|--------------|-------------|-------------|
| C11orf58  | -0.104353737 | 0.047562464 | 0.075709892 |
| SIGLEC16  | 0.104351669  | 0.047566888 | 0.075710884 |
| ABCC10    | 0.104338636  | 0.047594784 | 0.07574923  |
| ZKSCAN3   | 0.104332995  | 0.047606863 | 0.0757624   |
| TMC6      | 0.104311154  | 0.047653655 | 0.075830806 |
| RRP1B     | -0.104295061 | 0.047688155 | 0.075879643 |
| CRMP1     | -0.104258223 | 0.047767209 | 0.075996808 |
| ATG5      | -0.104257192 | 0.047769422 | 0.075996808 |
| PANX2     | 0.104252586  | 0.047779315 | 0.076006475 |
| FGF17     | 0.104228353  | 0.047831392 | 0.07608324  |
| EPB41L4B  | -0.104203163 | 0.047885572 | 0.076163338 |
| HTR3B     | 0.104127552  | 0.048048513 | 0.076416399 |
| LOC221122 | -0.104118055 | 0.048069012 | 0.076442895 |
| RAG2      | -0.104105669 | 0.048095757 | 0.07647932  |
| PRPH      | 0.104101635  | 0.048104471 | 0.076483313 |
| TTC18     | -0.104100951 | 0.048105949 | 0.076483313 |
| GUCY2GP   | -0.104098649 | 0.048110923 | 0.076485114 |
| HYAL2     | -0.104095073 | 0.048118647 | 0.076491288 |
| TRIM3     | -0.104090899 | 0.048127667 | 0.07649952  |
| ABCG8     | -0.104083596 | 0.048143452 | 0.076518503 |
| NGB       | 0.10407404   | 0.048164112 | 0.076545043 |
| PAIP1     | -0.104072317 | 0.048167837 | 0.076545043 |
| SNPH      | -0.104069925 | 0.04817301  | 0.076547156 |
| LRRC4B    | -0.104060897 | 0.04819254  | 0.076571219 |
| STEAP2    | 0.10405937   | 0.048195844 | 0.076571219 |
| LOC727924 | 0.104054399  | 0.048206599 | 0.076582196 |
| SLC25A29  | 0.104046199  | 0.048224347 | 0.076604281 |
| SNORA11B  | 0.104014188  | 0.048293681 | 0.076707561 |
| TMEM163   | -0.104012626 | 0.048297068 | 0.076707561 |
| KCTD4     | -0.103976909 | 0.048374532 | 0.076824466 |
| CENPL     | 0.103944847  | 0.048444158 | 0.076928906 |
| PDE4D     | -0.103942    | 0.048450344 | 0.076932595 |
| LOC286135 | 0.103927933  | 0.048480923 | 0.076975013 |
| AARS      | 0.103919653  | 0.048498928 | 0.076997461 |
| SLC6A12   | -0.103905507 | 0.048529704 | 0.077040181 |
| RGS9      | -0.103889757 | 0.048563988 | 0.07708846  |
| APEX2     | 0.103876421  | 0.048593032 | 0.077128416 |
| ZC3H12B   | -0.103867774 | 0.048611874 | 0.077152173 |
| IL1R2     | 0.103850249  | 0.048650077 | 0.077206652 |
| DNAJC5    | 0.103762369  | 0.048842027 | 0.077505096 |
| FANCL     | 0.103751628  | 0.048865531 | 0.077536217 |
| OR52K2    | -0.103679095 | 0.049024501 | 0.07778226  |
| NIP7      | 0.103610362  | 0.04917554  | 0.078015683 |
| ATP6V1D   | 0.103602675  | 0.049192456 | 0.078036304 |
| FMO1      | -0.103595534 | 0.049208175 | 0.078055023 |
| MOBK13    | -0.103589325 | 0.049221846 | 0.078070489 |

|           |              |             |             |
|-----------|--------------|-------------|-------------|
| DSTN      | -0.103552992 | 0.049301907 | 0.078191245 |
| FAM47C    | -0.103538471 | 0.049333935 | 0.078235811 |
| C6orf147  | 0.103511654  | 0.049393128 | 0.078323446 |
| FABP2     | 0.103477804  | 0.049467933 | 0.078435818 |
| C7orf23   | 0.10346319   | 0.049500256 | 0.078480822 |
| LOC148413 | 0.103410678  | 0.049616549 | 0.078658938 |
| C22orf31  | 0.103395592  | 0.049650001 | 0.078705705 |
| B3GALNT2  | -0.103391875 | 0.049658245 | 0.078712508 |
| SORD      | -0.103376064 | 0.04969333  | 0.078761852 |
| DHX32     | -0.103372705 | 0.049700787 | 0.078767402 |
| LAMP3     | -0.103310542 | 0.049838944 | 0.078980072 |
| OR13C2    | -0.103306662 | 0.049847579 | 0.07898747  |
| MMP11     | 0.103302601  | 0.049856615 | 0.078995504 |
| TLX2      | 0.103299998  | 0.04986241  | 0.0789984   |
| NIPA2     | -0.103286445 | 0.049892586 | 0.079039922 |
| XPO6      | 0.103280309  | 0.049906252 | 0.079055282 |
| KRTAP5-8  | 0.103220535  | 0.050039552 | 0.079260136 |
| TSPY1     | 0.103203913  | 0.050076675 | 0.079312626 |
| ZNF768    | 0.10320213   | 0.050080657 | 0.079312626 |
| LOC100240 | 0.103194312  | 0.050098126 | 0.079333984 |
| OR7E24    | -0.103192441 | 0.050102308 | 0.079334298 |
| DEFA5     | 0.103167398  | 0.050158301 | 0.079416646 |
| NCRNA0005 | -0.103160856 | 0.050172937 | 0.079433504 |
| NKRF      | -0.103155571 | 0.050184764 | 0.079445913 |
| TICAM2    | -0.103126923 | 0.05024891  | 0.079541137 |
| TRAM1L1   | 0.103122267  | 0.050259343 | 0.0795486   |
| ATXN2L    | -0.103121254 | 0.050261613 | 0.0795486   |
| LRPAP1    | 0.10308976   | 0.050332227 | 0.079654029 |
| HNRPDL    | 0.103015986  | 0.050497962 | 0.079909965 |
| PALM      | 0.103012896  | 0.050504913 | 0.079914615 |
| LIPH      | -0.10300336  | 0.050526372 | 0.079942218 |
| C1orf96   | -0.102999673 | 0.050534671 | 0.079948997 |
| CRYBA2    | 0.102986007  | 0.050565441 | 0.079991322 |
| PCBP2     | 0.102958169  | 0.050628167 | 0.080084189 |
| GRIK5     | 0.102945373  | 0.050657022 | 0.080123469 |
| C17orf82  | 0.102943246  | 0.050661821 | 0.080124695 |
| PPDPF     | 0.102848451  | 0.050876025 | 0.080457083 |
| TGM1      | 0.102839664  | 0.050895918 | 0.080482151 |
| VPS26A    | 0.102789571  | 0.051009454 | 0.080655281 |
| PPEF2     | -0.102770193 | 0.05105343  | 0.080718408 |
| C2orf78   | -0.102759229 | 0.051078327 | 0.08075136  |
| PPM1F     | 0.102737386  | 0.051127957 | 0.080823405 |
| SMAP2     | -0.102730608 | 0.051143364 | 0.080841344 |
| SLC12A1   | -0.102706441 | 0.051198333 | 0.08092181  |
| TTC24     | -0.102692963 | 0.051229013 | 0.080963876 |
| WEE2      | -0.102681    | 0.051256255 | 0.081000502 |

|           |              |             |             |
|-----------|--------------|-------------|-------------|
| C14orf105 | -0.102669387 | 0.051282712 | 0.08103588  |
| DEFB1     | -0.102661237 | 0.051301286 | 0.081058799 |
| STK17A    | 0.102612439  | 0.051412619 | 0.081228267 |
| GLYCTK    | 0.102591834  | 0.051459688 | 0.081296183 |
| C11orf9   | -0.10258586  | 0.051473342 | 0.081311304 |
| SCML2     | 0.102579017  | 0.051488986 | 0.081329565 |
| KIF21B    | -0.102563322 | 0.051524882 | 0.08137981  |
| ZBED5     | -0.102544315 | 0.051568377 | 0.081442049 |
| RPH3AL    | -0.102527733 | 0.051606351 | 0.081495558 |
| PTPN18    | 0.10250542   | 0.051657485 | 0.081569839 |
| METTL13   | 0.102487493  | 0.051698597 | 0.081622461 |
| INGX      | 0.102487315  | 0.051699007 | 0.081622461 |
| ADRB1     | -0.102473954 | 0.051729665 | 0.081664391 |
| PHF13     | -0.102469721 | 0.051739382 | 0.081673256 |
| CARD11    | -0.102464679 | 0.051750958 | 0.081685054 |
| TPTE2P1   | 0.102442472  | 0.051801967 | 0.081759088 |
| HDAC10    | 0.102433528  | 0.051822524 | 0.081785051 |
| LMOD3     | -0.102412441 | 0.051871014 | 0.081855091 |
| PHIP      | -0.102409866 | 0.05187694  | 0.081857956 |
| TUBB8     | 0.102401861  | 0.05189536  | 0.081880533 |
| TTLL13    | 0.10237902   | 0.051947948 | 0.081951253 |
| IL27      | -0.102378818 | 0.051948412 | 0.081951253 |
| PIRT      | 0.102374341  | 0.051958725 | 0.08196103  |
| C3orf52   | -0.10229142  | 0.052150045 | 0.082256309 |
| NFE2      | 0.102255625  | 0.052232816 | 0.082380339 |
| LYSMD1    | 0.102117259  | 0.052553793 | 0.082880012 |
| FKBP6     | 0.102115256  | 0.05255845  | 0.082880793 |
| C18orf62  | -0.102092035 | 0.052612483 | 0.08295943  |
| UBQLNL    | -0.102089877 | 0.052617507 | 0.082960783 |
| MCM3APAS  | -0.102059821 | 0.052687517 | 0.08306459  |
| FAM153C   | -0.102050389 | 0.052709503 | 0.083092674 |
| PLG       | -0.102005668 | 0.052813851 | 0.083250582 |
| HIST1H3F  | 0.102002893  | 0.052820333 | 0.083254208 |
| SH3BP1    | 0.101991876  | 0.052846068 | 0.083288181 |
| SIGLEC10  | -0.101982943 | 0.052866942 | 0.083314485 |
| PHLDA3    | -0.101961969 | 0.052915982 | 0.083385171 |
| C7orf69   | -0.101959668 | 0.052921363 | 0.083387052 |
| SNORA71A  | 0.10191337   | 0.053029759 | 0.083551238 |
| NUBPL     | -0.101858043 | 0.053159532 | 0.083749076 |
| PDE6G     | 0.101811391  | 0.053269164 | 0.083915156 |
| NEURL     | 0.101788669  | 0.053322627 | 0.083985388 |
| MAS1      | -0.10178739  | 0.053325638 | 0.083985388 |
| SNTB1     | 0.101787067  | 0.053326399 | 0.083985388 |
| FBXO2     | -0.101784783 | 0.053331776 | 0.083987215 |
| ZNF788    | -0.101752621 | 0.05340754  | 0.084099878 |
| DDX19B    | -0.101746573 | 0.053421796 | 0.084115676 |

|           |              |             |             |
|-----------|--------------|-------------|-------------|
| WDFY2     | -0.10168991  | 0.053555523 | 0.08431957  |
| NCRNA0011 | 0.101685345  | 0.053566311 | 0.084329888 |
| TMSB15B   | -0.101670881 | 0.053600497 | 0.084377037 |
| LRFN3     | -0.101660797 | 0.05362434  | 0.084401565 |
| OR11L1    | 0.101659626  | 0.053627109 | 0.084401565 |
| IL24      | -0.101658915 | 0.053628793 | 0.084401565 |
| PCDHA5    | -0.101649147 | 0.053651899 | 0.084431258 |
| CYP4A11   | -0.101627348 | 0.053703497 | 0.084505779 |
| ZFP64     | -0.101607493 | 0.05375053  | 0.084573106 |
| LSM11     | 0.101593975  | 0.05378257  | 0.084616834 |
| CBR1      | 0.101551842  | 0.053882538 | 0.084767418 |
| C4orf42   | -0.101524965 | 0.05394639  | 0.084861166 |
| TMEM184B  | -0.101504459 | 0.053995147 | 0.084931154 |
| C13orf34  | 0.101494797  | 0.054018132 | 0.084958745 |
| CXCR1     | -0.1014935   | 0.05402122  | 0.084958745 |
| ACADS     | -0.101459213 | 0.054102859 | 0.08508042  |
| CD59      | -0.101452812 | 0.054118112 | 0.085097687 |
| STX6      | 0.101437477  | 0.054154666 | 0.085148442 |
| CD5       | -0.101415949 | 0.054206019 | 0.085222458 |
| WDR93     | 0.101393129  | 0.054260499 | 0.085301377 |
| DIRC3     | -0.1013887   | 0.054271076 | 0.085307645 |
| ZNF527    | -0.101387308 | 0.054274401 | 0.085307645 |
| ANKRD58   | 0.101386079  | 0.054277337 | 0.085307645 |
| KAT5      | 0.101318378  | 0.054439273 | 0.085555407 |
| C3orf50   | 0.101311069  | 0.054456778 | 0.085576165 |
| PSIP1     | -0.101279503 | 0.054532438 | 0.0856883   |
| ZNF184    | -0.10120011  | 0.054723122 | 0.085979599 |
| CCNJ      | -0.101198723 | 0.054726458 | 0.085979599 |
| ACVR2A    | -0.101177454 | 0.054777638 | 0.086053219 |
| SEMA3B    | 0.101172803  | 0.054788834 | 0.086064018 |
| FAM178B   | 0.101163971  | 0.0548101   | 0.086090634 |
| FAM86B2   | -0.101161904 | 0.054815081 | 0.086091667 |
| P2RX6     | 0.101152329  | 0.054838147 | 0.086121102 |
| TTC32     | 0.101145528  | 0.054854536 | 0.086140047 |
| LCN15     | 0.101130737  | 0.05489019  | 0.086189241 |
| MBD1      | -0.101128241 | 0.054896209 | 0.086191896 |
| KLRG1     | -0.10112116  | 0.054913288 | 0.086209501 |
| POLD3     | -0.101120003 | 0.05491608  | 0.086209501 |
| VDAC3     | 0.101081325  | 0.055009448 | 0.086349268 |
| R3HDML    | -0.101074179 | 0.055026713 | 0.086369561 |
| ARHGEF38  | -0.101054586 | 0.055074072 | 0.086437082 |
| DNAJC12   | 0.101046347  | 0.055093996 | 0.086460785 |
| AANAT     | 0.101044751  | 0.055097857 | 0.086460785 |
| EXTL3     | -0.10085336  | 0.055562431 | 0.087182935 |
| LOC100133 | -0.100770194 | 0.055765314 | 0.087494385 |
| ZNF274    | -0.100762173 | 0.055784915 | 0.087518243 |

|           |              |             |             |
|-----------|--------------|-------------|-------------|
| GSTM3     | 0.100694595  | 0.055950271 | 0.087770747 |
| ZNF559    | -0.100688177 | 0.055965997 | 0.087788503 |
| LOC728723 | -0.100681179 | 0.055983147 | 0.087808487 |
| NUCB1     | 0.100678321  | 0.055990152 | 0.087811742 |
| CSF1R     | -0.100676735 | 0.05599404  | 0.087811742 |
| LMX1A     | 0.100669458  | 0.056011881 | 0.087832805 |
| TMC2      | 0.100665125  | 0.056022508 | 0.087842551 |
| NAT8B     | 0.100660442  | 0.056033996 | 0.087853647 |
| TFG       | 0.100656946  | 0.056042571 | 0.087855287 |
| PCA3      | 0.100656418  | 0.056043865 | 0.087855287 |
| TMEM8B    | 0.100646609  | 0.056067936 | 0.087886103 |
| TNFRSF9   | -0.100624102 | 0.056123194 | 0.087965796 |
| PTK6      | -0.100543962 | 0.056320318 | 0.088267816 |
| LTC4S     | -0.100469056 | 0.056505088 | 0.088550427 |
| CLEC18B   | 0.100456411  | 0.056536331 | 0.088592417 |
| LOC285401 | 0.100361366  | 0.056771608 | 0.088954096 |
| HIBCH     | -0.100359511 | 0.056776207 | 0.088954304 |
| ALDOC     | 0.100344305  | 0.056813927 | 0.089006399 |
| VWA5A     | -0.100326665 | 0.056857709 | 0.089067984 |
| UBE2QL1   | -0.100317369 | 0.056880792 | 0.089097135 |
| AMELY     | 0.100306237  | 0.056908446 | 0.089133442 |
| RUNDC1    | -0.100298007 | 0.056928898 | 0.089158462 |
| C8orf39   | -0.100289451 | 0.056950165 | 0.089184756 |
| HSFY1     | -0.100285395 | 0.056960249 | 0.089193534 |
| HBB       | -0.100207364 | 0.057154549 | 0.089487626 |
| C9orf135  | 0.100206362  | 0.057157048 | 0.089487626 |
| NTAN1     | 0.10019542   | 0.05718434  | 0.089523318 |
| TMEM126B  | 0.100181042  | 0.057220215 | 0.08957244  |
| LCE1F     | 0.100137694  | 0.057328495 | 0.089734887 |
| SVOPL     | 0.100119377  | 0.057374298 | 0.089799525 |
| CD22      | -0.10011468  | 0.057386049 | 0.089810858 |
| SGSH      | 0.100111392  | 0.057394275 | 0.089816673 |
| CLRN3     | -0.100104398 | 0.057411777 | 0.089837003 |
| TRPM2     | 0.100101319  | 0.057419484 | 0.089842003 |
| C3orf66   | 0.100073796  | 0.057488412 | 0.089942787 |
| SLC25A12  | -0.100064081 | 0.057512758 | 0.089973808 |
| FDXR      | 0.100062195  | 0.057517485 | 0.089974135 |
| BHMT      | -0.100026159 | 0.057607872 | 0.09010845  |
| SLC29A4   | 0.100024146  | 0.057612926 | 0.090109276 |
| LCE3D     | -0.100015381 | 0.057634929 | 0.090136612 |
| GAS2      | 0.09999161   | 0.057694643 | 0.090222914 |
| HIST1H3G  | 0.099987673  | 0.057704538 | 0.090231302 |
| HSH2D     | 0.099984229  | 0.057713194 | 0.090237752 |
| IARS      | -0.09997418  | 0.057738459 | 0.090270169 |
| ANKRD24   | -0.099941646 | 0.057820316 | 0.09039105  |
| CD68      | 0.099927666  | 0.05785552  | 0.090438985 |

|           |              |             |             |
|-----------|--------------|-------------|-------------|
| MAGEA8    | 0.099897009  | 0.057932783 | 0.090552654 |
| RHBDF1    | -0.099879684 | 0.057976484 | 0.09061385  |
| ASPHD1    | 0.099874656  | 0.057989172 | 0.090626569 |
| HLA-DOB   | 0.09987176   | 0.05799648  | 0.090630877 |
| KCNC2     | 0.099852552  | 0.058044978 | 0.090699547 |
| ACN9      | 0.099841802  | 0.058072134 | 0.090734861 |
| SDHA      | -0.099826465 | 0.058110895 | 0.0907883   |
| NUB1      | 0.09978787   | 0.058208531 | 0.090933707 |
| CCKBR     | 0.099778097  | 0.058233277 | 0.090965229 |
| ALG13     | -0.099745018 | 0.058317096 | 0.091089017 |
| C17orf108 | -0.099720195 | 0.058380064 | 0.091174857 |
| PPAN-P2RY | -0.099719743 | 0.058381209 | 0.091174857 |
| DUXA      | 0.099710053  | 0.058405806 | 0.091206118 |
| C6orf165  | -0.099698362 | 0.058435491 | 0.09124532  |
| SAPS2     | 0.099694695  | 0.058444805 | 0.091247055 |
| SERPING1  | -0.099694316 | 0.058445766 | 0.091247055 |
| CCR5      | -0.099639732 | 0.058584549 | 0.091456557 |
| MGP       | -0.099624033 | 0.058624518 | 0.091511778 |
| NRSN2     | 0.099617659  | 0.058640749 | 0.091529942 |
| FBLN7     | -0.099607649 | 0.058666251 | 0.09156257  |
| TMEM176B  | 0.099603359  | 0.058677182 | 0.091572453 |
| CYP4Z2P   | -0.099584448 | 0.058725393 | 0.09164051  |
| CST9      | 0.099548329  | 0.058817559 | 0.091777143 |
| NUP210    | 0.099531784  | 0.058859817 | 0.091835887 |
| C7orf10   | 0.099464229  | 0.059032627 | 0.092098297 |
| C3orf51   | 0.099452005  | 0.059063942 | 0.092139935 |
| SLITRK4   | -0.099442452 | 0.059088423 | 0.092170904 |
| KRTAP4-8  | -0.099431135 | 0.059117436 | 0.092204092 |
| TMPO      | -0.09942885  | 0.059123295 | 0.092204092 |
| YARS2     | 0.099428736  | 0.059123588 | 0.092204092 |
| DNALI1    | 0.099425928  | 0.059130789 | 0.092208102 |
| WFDC6     | 0.099422958  | 0.059138407 | 0.09221276  |
| MIOX      | 0.099413862  | 0.059161742 | 0.092241924 |
| DDX12     | 0.099389704  | 0.059223752 | 0.092331377 |
| YPEL1     | -0.099371084 | 0.059271584 | 0.092398716 |
| MAPK8IP2  | 0.09934379   | 0.059341756 | 0.092499983 |
| B3GALT1   | -0.099342205 | 0.059345834 | 0.092499983 |
| NRARP     | -0.099325264 | 0.059389426 | 0.092560684 |
| MS4A8B    | 0.099317741  | 0.059408791 | 0.092583619 |
| AMD1      | -0.099302472 | 0.059448114 | 0.092637652 |
| CCDC84    | 0.099300119  | 0.059454177 | 0.092639851 |
| CFHR5     | -0.099296355 | 0.059463873 | 0.09264771  |
| LHX4      | 0.099275816  | 0.059516813 | 0.092722939 |
| LITAF     | -0.099259025 | 0.059560121 | 0.092783152 |
| SLC17A4   | -0.099254505 | 0.059571785 | 0.092793793 |
| C10orf99  | -0.099252767 | 0.059576271 | 0.092793793 |

|           |              |             |             |
|-----------|--------------|-------------|-------------|
| ULK3      | -0.099245997 | 0.059593743 | 0.092813748 |
| POU3F1    | -0.09923758  | 0.059615472 | 0.092840328 |
| MED24     | 0.099234166  | 0.059624287 | 0.092846797 |
| ISX       | 0.099230468  | 0.059633839 | 0.09285441  |
| POPDC2    | -0.099211404 | 0.059683091 | 0.092923833 |
| NRD1      | 0.099181244  | 0.059761082 | 0.093037988 |
| CRYAB     | 0.099170788  | 0.059788138 | 0.093072835 |
| EFCAB4A   | 0.09915474   | 0.059829686 | 0.093130232 |
| RPGRIPI   | -0.099148867 | 0.059844897 | 0.09314009  |
| C9orf24   | 0.099148683  | 0.059845372 | 0.09314009  |
| CARM1     | 0.099146777  | 0.059850311 | 0.093140497 |
| C10orf131 | -0.099139317 | 0.059869638 | 0.093163294 |
| TMEM129   | -0.099128612 | 0.059897381 | 0.093199077 |
| C7orf68   | 0.099126833  | 0.059901993 | 0.093199077 |
| ARVCF     | 0.099111664  | 0.059941325 | 0.093252987 |
| SUGT1P1   | -0.099088534 | 0.060001341 | 0.093339065 |
| AQPEP     | 0.099082571  | 0.060016821 | 0.093355853 |
| SLFN13    | -0.09901828  | 0.060183937 | 0.093608489 |
| TMEM9B    | -0.099001039 | 0.060228818 | 0.093670981 |
| STK32B    | -0.098993167 | 0.060249318 | 0.093695546 |
| MMP19     | 0.098969199  | 0.060311775 | 0.093778172 |
| HIST1H2BA | -0.098969164 | 0.060311867 | 0.093778172 |
| CENPE     | 0.098950219  | 0.060361271 | 0.093847663 |
| COL23A1   | -0.098935564 | 0.060399511 | 0.093899787 |
| NUDT11    | -0.098925333 | 0.060426219 | 0.093933976 |
| NKX2-4    | -0.098898649 | 0.060495925 | 0.094034994 |
| GBP6      | -0.098864809 | 0.060584416 | 0.094165195 |
| LILRA4    | -0.098842846 | 0.060641908 | 0.094247199 |
| CREM      | -0.098783392 | 0.060797764 | 0.09448205  |
| UPB1      | -0.098774195 | 0.060821904 | 0.094512189 |
| LOC158696 | -0.098769058 | 0.060835391 | 0.094525771 |
| SMARCD2   | 0.098755876  | 0.060870008 | 0.09457218  |
| TWIST1    | -0.098738773 | 0.060914948 | 0.094634619 |
| PIP5K1B   | -0.098733242 | 0.060929486 | 0.094649822 |
| RDH16     | -0.098699837 | 0.061017358 | 0.094778932 |
| ZC3H15    | -0.098693579 | 0.06103383  | 0.094797125 |
| ARMC3     | 0.098677858  | 0.06107523  | 0.094854028 |
| REP15     | 0.098670107  | 0.06109565  | 0.094878343 |
| TEAD2     | 0.098659513  | 0.061123568 | 0.094914297 |
| DLG5      | -0.098657314 | 0.061129366 | 0.094915899 |
| FXRD4     | 0.098634094  | 0.061190601 | 0.095003572 |
| BTLA      | -0.098608001 | 0.06125947  | 0.095103082 |
| PCDHA1    | 0.098593073  | 0.0612989   | 0.095156878 |
| TNFSF13B  | -0.098526007 | 0.061476304 | 0.095424831 |
| VSIG10    | -0.098490021 | 0.061571668 | 0.09556541  |
| RAP1GDS1  | -0.09847723  | 0.061605594 | 0.095610615 |

|            |              |             |             |
|------------|--------------|-------------|-------------|
| FAM75C1    | 0.098454846  | 0.061665002 | 0.095695357 |
| SH2D5      | 0.098437965  | 0.061709837 | 0.095757472 |
| SPPL2B     | 0.098430408  | 0.061729916 | 0.095781168 |
| C3orf31    | 0.098422514  | 0.061750896 | 0.095806256 |
| SNORA67    | 0.098408875  | 0.061787159 | 0.095855505 |
| PCOLCE2    | 0.0983836    | 0.061854404 | 0.095951897 |
| CLDN18     | 0.098375641  | 0.061875594 | 0.095977292 |
| HDAC4      | -0.098355689 | 0.061928734 | 0.096052237 |
| NOL6       | -0.09834346  | 0.061961326 | 0.096095305 |
| SYN3       | 0.098326523  | 0.062006485 | 0.096157853 |
| REG1B      | 0.098311808  | 0.062045744 | 0.096211243 |
| DUSP5      | -0.098302686 | 0.062070089 | 0.096241499 |
| SFRS1      | -0.098299242 | 0.062079285 | 0.096248265 |
| ELAVL4     | -0.098277243 | 0.062138038 | 0.096331857 |
| SPDEF      | 0.098197377  | 0.06235173  | 0.096655616 |
| OPRK1      | 0.098183757  | 0.062388233 | 0.096703133 |
| PIM1       | 0.098182316  | 0.062392094 | 0.096703133 |
| MAPK15     | 0.098141388  | 0.062501895 | 0.096865778 |
| KIF25      | 0.098103202  | 0.062604485 | 0.097017222 |
| C11orf94   | 0.09809482   | 0.06262702  | 0.097044592 |
| C1orf226   | -0.098090883 | 0.062637609 | 0.097053449 |
| KIR3DX1    | -0.098088628 | 0.062643674 | 0.097055296 |
| CST7       | 0.098055562  | 0.062732665 | 0.097185611 |
| LOC100128  | -0.098051008 | 0.06274493  | 0.097190606 |
| FAM177B    | -0.09805074  | 0.06274565  | 0.097190606 |
| SLC22A18AS | 0.098033015  | 0.062793404 | 0.097250435 |
| CLSPN      | -0.098032779 | 0.062794042 | 0.097250435 |
| TAB1       | 0.097987177  | 0.062917041 | 0.097433349 |
| MYO7B      | -0.097983505 | 0.062926953 | 0.097441122 |
| LOC727896  | -0.097973593 | 0.062953718 | 0.097474987 |
| IPO4       | 0.097967913  | 0.06296906  | 0.097491162 |
| OR6A2      | -0.097921025 | 0.06309582  | 0.097679824 |
| METTL8     | -0.09790542  | 0.063138053 | 0.097734966 |
| LHCGR      | -0.097904238 | 0.063141254 | 0.097734966 |
| PHYHD1     | -0.097899652 | 0.06315367  | 0.097746587 |
| ASB14      | -0.097897733 | 0.063158867 | 0.097747035 |
| ANKRD33    | 0.097894645  | 0.063167229 | 0.097752379 |
| SPDYA      | 0.097873762  | 0.063223806 | 0.097832331 |
| FRMPD4     | -0.097871749 | 0.06322926  | 0.097833169 |
| LOC100128  | -0.097851259 | 0.063284817 | 0.097911524 |
| SLC2A11    | -0.097841832 | 0.063310392 | 0.097943483 |
| TBC1D29    | -0.09782604  | 0.063353252 | 0.098002176 |
| C22orf46   | -0.097803632 | 0.063414108 | 0.098088696 |
| C6orf94    | 0.097779675  | 0.063479226 | 0.098181794 |
| PPP1R15A   | -0.097775    | 0.06349194  | 0.098193832 |
| FNBP1      | -0.097728926 | 0.063617346 | 0.09838014  |



|           |              |             |             |
|-----------|--------------|-------------|-------------|
| SLITRK3   | -0.097701815 | 0.063691235 | 0.098486757 |
| SPATS2    | 0.097689197  | 0.063725648 | 0.098532319 |
| KIAA1328  | -0.097680931 | 0.063748201 | 0.098559538 |
| RPS2P32   | 0.09767845   | 0.063754971 | 0.098562354 |
| PKHD1L1   | 0.097676194  | 0.063761127 | 0.09856422  |
| AGAP6     | -0.097663919 | 0.063794636 | 0.098608365 |
| FAM53A    | 0.09765906   | 0.063807903 | 0.098621217 |
| CHRM1     | 0.097620882  | 0.063912231 | 0.098774801 |
| IL12RB2   | -0.097599001 | 0.063972087 | 0.098859635 |
| TSGA13    | 0.097593169  | 0.063988048 | 0.098876627 |
| LACTB2    | -0.097569958 | 0.064051606 | 0.098962986 |
| UTS2D     | -0.09756913  | 0.064053873 | 0.098962986 |
| SAT1      | -0.097544257 | 0.064122041 | 0.099060134 |
| SHISA9    | -0.097542558 | 0.064126701 | 0.099060134 |
| ZCWPW2    | -0.097531853 | 0.064156059 | 0.099097799 |
| FCGBP     | 0.097526482  | 0.064170794 | 0.099112871 |
| GNB1      | -0.097518988 | 0.064191357 | 0.099136942 |
| HOXA13    | -0.097483712 | 0.064288225 | 0.099278846 |
| KIAA0802  | -0.09746982  | 0.064326404 | 0.099330103 |
| FAM18A    | -0.097464803 | 0.064340197 | 0.099335895 |
| DMRT2     | 0.097464482  | 0.064341082 | 0.099335895 |
| CYCS      | 0.097463013  | 0.064345119 | 0.099335895 |
| TRPC4AP   | 0.097448836  | 0.064384112 | 0.099384619 |
| NOX5      | -0.097447909 | 0.064386661 | 0.099384619 |
| FLJ35220  | 0.097439975  | 0.064408493 | 0.099410613 |
| C10orf57  | -0.097435819 | 0.064419929 | 0.099420559 |
| CENPO     | 0.097427178  | 0.064443718 | 0.099449566 |
| IFT88     | -0.097423588 | 0.064453602 | 0.099457112 |
| SNORA18   | -0.097399283 | 0.064520554 | 0.099552711 |
| SMAD3     | -0.097397129 | 0.064526491 | 0.099554157 |
| DCAF8L1   | 0.097361979  | 0.064623427 | 0.099695991 |
| P2RX5     | 0.09733978   | 0.064684708 | 0.099782801 |
| LOC100131 | -0.097331274 | 0.0647082   | 0.099811308 |
| FAM116B   | 0.097314622  | 0.064754216 | 0.099874551 |
| ATP13A1   | 0.097304399  | 0.064782477 | 0.099910402 |
| KRTAP19-8 | -0.097254308 | 0.064921103 | 0.100116445 |
| LOC100128 | -0.097245589 | 0.064945256 | 0.100145937 |
| TERF2IP   | -0.097240608 | 0.06495906  | 0.100159467 |
| INSC      | -0.097226502 | 0.064998159 | 0.100211995 |
| KRTAP12-2 | -0.097198006 | 0.065077208 | 0.100326102 |
| DNAJB6    | 0.097191625  | 0.065094919 | 0.100345639 |
| ST6GALNAC | 0.097145348  | 0.065223487 | 0.100531545 |
| PDLIM3    | -0.097143546 | 0.065228498 | 0.100531545 |
| S100A11   | 0.097142768  | 0.065230662 | 0.100531545 |
| GJA10     | -0.097135009 | 0.065252241 | 0.10055702  |
| ZNF502    | -0.097118275 | 0.0652988   | 0.100620842 |

|           |              |             |             |
|-----------|--------------|-------------|-------------|
| PIWIL1    | -0.097115129 | 0.065307556 | 0.100620842 |
| PEX5L     | -0.097114678 | 0.065308812 | 0.100620842 |
| CLPB      | -0.097110734 | 0.065319791 | 0.100629971 |
| PQLC1     | 0.097058658  | 0.065464897 | 0.100845716 |
| NUDT16P1  | -0.097042595 | 0.065509708 | 0.10090694  |
| DNAJC28   | -0.097029981 | 0.065544916 | 0.100953364 |
| KIAA0195  | 0.096987475  | 0.06566367  | 0.101128449 |
| ITGB7     | -0.096930144 | 0.06582412  | 0.10136418  |
| C12orf76  | 0.096929148  | 0.065826911 | 0.10136418  |
| BRD7P3    | -0.096909834 | 0.065881039 | 0.101439686 |
| RPS27L    | 0.096885466  | 0.065949384 | 0.101537069 |
| DCTN4     | -0.096876516 | 0.065974502 | 0.101567889 |
| PHTF2     | -0.096872061 | 0.065987005 | 0.101579285 |
| OR8B3     | 0.096860183  | 0.066020357 | 0.10161649  |
| TSPAN10   | 0.096859819  | 0.066021379 | 0.10161649  |
| GUSB      | 0.096805992  | 0.06617269  | 0.101841508 |
| PRB3      | 0.096798302  | 0.066194328 | 0.101866938 |
| C2orf89   | 0.096760961  | 0.066299491 | 0.10202089  |
| HERC5     | -0.096743324 | 0.066349209 | 0.102089507 |
| LOC572558 | -0.0967258   | 0.066398639 | 0.102157672 |
| ANLN      | 0.096723825  | 0.066404212 | 0.102158353 |
| INTU      | -0.096711744 | 0.066438307 | 0.102202912 |
| WNT16     | -0.09666262  | 0.0665771   | 0.102408507 |
| CFB       | 0.096616441  | 0.066707791 | 0.10260161  |
| TAX1BP3   | 0.096599546  | 0.066755655 | 0.102667301 |
| CCDC18    | -0.096570865 | 0.066836977 | 0.102784432 |
| RILP      | 0.09655302   | 0.066887618 | 0.102854367 |
| ZFP62     | -0.096549324 | 0.066898109 | 0.102862558 |
| RAB23     | -0.096539247 | 0.066926722 | 0.102898608 |
| GSX1      | 0.096516524  | 0.066991279 | 0.102989913 |
| C19orf20  | 0.096491429  | 0.067062636 | 0.103091656 |
| TWIST2    | -0.096483585 | 0.067084951 | 0.103117999 |
| FAM92A1   | -0.096481615 | 0.067090557 | 0.103118658 |
| CIRH1A    | 0.096476977  | 0.067103755 | 0.103130984 |
| FCGR1A    | 0.096459126  | 0.067154577 | 0.103201127 |
| LOC147727 | 0.096432271  | 0.067231094 | 0.103310744 |
| PLK4      | 0.096428485  | 0.067241886 | 0.103319355 |
| DUSP11    | -0.096426402 | 0.067247825 | 0.103320509 |
| RTEL1     | 0.096405388  | 0.06730776  | 0.103404616 |
| KREMEN2   | 0.096399467  | 0.067324656 | 0.103422595 |
| AOAH      | -0.096366845 | 0.067417803 | 0.103553187 |
| SH2D3A    | 0.096366053  | 0.067420066 | 0.103553187 |
| GABRA3    | 0.096348463  | 0.067470339 | 0.10362241  |
| RD3       | -0.096316341 | 0.067562221 | 0.103755523 |
| LOC400657 | 0.096301081  | 0.067605906 | 0.103814606 |
| CDK19     | -0.096293077 | 0.067628829 | 0.103841799 |

|           |              |             |             |
|-----------|--------------|-------------|-------------|
| CA5BP     | -0.096288409 | 0.067642201 | 0.103854324 |
| FLJ37543  | -0.096216259 | 0.067849157 | 0.104164042 |
| CXCL9     | -0.096165528 | 0.067994981 | 0.10437987  |
| LDHD      | -0.096149507 | 0.068041089 | 0.104442599 |
| CYB5D2    | -0.096137279 | 0.068076295 | 0.104483501 |
| ARRDC2    | -0.096136608 | 0.068078228 | 0.104483501 |
| MGC16121  | 0.096125794  | 0.068109378 | 0.104523253 |
| MLX       | 0.096119821  | 0.068126586 | 0.104541606 |
| PSME4     | -0.096110519 | 0.068153395 | 0.104574687 |
| CCDC120   | -0.096094458 | 0.068199706 | 0.104637685 |
| UBLCP1    | -0.096085273 | 0.0682262   | 0.10467027  |
| LRRC8D    | -0.096082487 | 0.068234238 | 0.104674538 |
| GYP A     | -0.09606743  | 0.068277692 | 0.104733131 |
| C1orf189  | 0.096061742  | 0.068294115 | 0.104743988 |
| C22orf23  | -0.096060053 | 0.068298994 | 0.104743988 |
| CALN1     | -0.096059514 | 0.068300549 | 0.104743988 |
| SCARNA21  | 0.096045161  | 0.068342006 | 0.104799496 |
| CCNG1     | -0.096027336 | 0.068393518 | 0.104870412 |
| GIPR      | -0.096021735 | 0.068409711 | 0.104887165 |
| SSX2IP    | -0.095962241 | 0.068581908 | 0.105143087 |
| SMAP1     | 0.09594148   | 0.068642081 | 0.105227238 |
| POLR2J3   | 0.095909467  | 0.068734953 | 0.105356315 |
| TOR3A     | 0.095908809  | 0.068736862 | 0.105356315 |
| UOX       | -0.095892727 | 0.068783558 | 0.105419776 |
| ACTR1B    | -0.095889526 | 0.068792856 | 0.105425912 |
| ADPGK     | -0.095886208 | 0.068802493 | 0.105432567 |
| FBXO7     | -0.095864847 | 0.06886457  | 0.105519574 |
| LOC285692 | 0.095847631  | 0.068914634 | 0.105588163 |
| C21orf54  | -0.095835147 | 0.068950956 | 0.105629833 |
| FAM123C   | 0.095834637  | 0.068952439 | 0.105629833 |
| NAT8      | 0.095828847  | 0.068969289 | 0.105647519 |
| PRKCQ     | -0.095786241 | 0.069093396 | 0.105829487 |
| ZNF846    | 0.095764527  | 0.069156717 | 0.10591285  |
| LOC100289 | 0.09576393   | 0.069158459 | 0.10591285  |
| PRKCI     | -0.095752772 | 0.069191016 | 0.105954562 |
| PCDH8     | 0.095733569  | 0.069247076 | 0.106032256 |
| PSTPIP2   | -0.095722342 | 0.069279869 | 0.106074313 |
| LOC400891 | 0.095674733  | 0.069419071 | 0.106279274 |
| CACNG2    | 0.09566126   | 0.069458503 | 0.10633147  |
| PMS1      | -0.09561993  | 0.069579589 | 0.106505604 |
| CTDSPL    | 0.095618784  | 0.069582948 | 0.106505604 |
| ERVFRDE1  | -0.095614305 | 0.069596081 | 0.106517519 |
| GPR12     | -0.095581556 | 0.069692167 | 0.106656382 |
| PFKP      | -0.095566015 | 0.069737801 | 0.10671802  |
| SLITRK2   | -0.095514929 | 0.069887987 | 0.106939628 |
| IL5RA     | -0.095505997 | 0.069914272 | 0.106971629 |

|           |              |             |             |
|-----------|--------------|-------------|-------------|
| ICAM4     | 0.095504114  | 0.069919813 | 0.106971889 |
| IRF4      | -0.095498931 | 0.069935073 | 0.106987016 |
| HIST2H2BE | -0.09546709  | 0.070028863 | 0.107122268 |
| METTL9    | 0.095460246  | 0.070049038 | 0.107144899 |
| SCGB3A1   | 0.095455091  | 0.070064235 | 0.107159444 |
| VPS35     | -0.09545337  | 0.070069308 | 0.107159444 |
| PCYOX1L   | -0.095429771 | 0.070138921 | 0.107257669 |
| CDH3      | -0.095420141 | 0.070167347 | 0.107292899 |
| HMGN3     | 0.095412289  | 0.070190527 | 0.107320103 |
| ARTN      | 0.095401871  | 0.070221295 | 0.107358904 |
| CRABP2    | -0.095395479 | 0.070240178 | 0.10737953  |
| MS4A13    | 0.095393037  | 0.070247395 | 0.10738232  |
| HS3ST4    | 0.095387671  | 0.070263252 | 0.107398316 |
| VANGL2    | -0.095376046 | 0.070297612 | 0.10744259  |
| PIGW      | -0.095373599 | 0.070304849 | 0.107445405 |
| LRRC24    | 0.09533804   | 0.070410051 | 0.107597926 |
| SULT1A2   | 0.095329949  | 0.070434006 | 0.10762222  |
| HES3      | 0.09532902   | 0.070436757 | 0.10762222  |
| CCDC74A   | -0.095316183 | 0.07047478  | 0.107672056 |
| OLR1      | -0.095263166 | 0.070631988 | 0.107903962 |
| PSG10     | -0.095204267 | 0.070806975 | 0.108155389 |
| MOCOS     | -0.095204115 | 0.07080743  | 0.108155389 |
| ZNF80     | -0.095194535 | 0.070835925 | 0.108190616 |
| SCN10A    | -0.095180191 | 0.070878607 | 0.108247504 |
| HBM       | -0.095173923 | 0.070897266 | 0.108267698 |
| C4orf6    | 0.095171271  | 0.07090516  | 0.108271451 |
| CACNA1E   | 0.095164228  | 0.070926134 | 0.10829407  |
| MYLPF     | 0.095161245  | 0.070935017 | 0.10829407  |
| TCP10     | 0.095160819  | 0.070936286 | 0.10829407  |
| HMGN5     | -0.095157637 | 0.070945764 | 0.108300236 |
| CD109     | -0.095140571 | 0.070996612 | 0.108369551 |
| TM2D1     | -0.095130026 | 0.071028049 | 0.108409227 |
| CDHR5     | 0.095120536  | 0.071056348 | 0.108444109 |
| ODF3B     | 0.095096468  | 0.071128162 | 0.10854539  |
| LOC392196 | -0.095079561 | 0.071178643 | 0.108614104 |
| POLR3G    | 0.095065171  | 0.071221632 | 0.108671376 |
| RB1CC1    | -0.095043422 | 0.071286647 | 0.108762244 |
| KRTAP3-2  | 0.095039297  | 0.071298983 | 0.108772733 |
| BAI1      | -0.095019122 | 0.071359343 | 0.108856478 |
| FAM188B   | 0.095008074  | 0.071392414 | 0.108898586 |
| RAD9B     | -0.094997249 | 0.071424833 | 0.108939692 |
| SLC35C1   | -0.094977023 | 0.071485434 | 0.109023772 |
| SEL1L3    | -0.094934437 | 0.071613165 | 0.109210214 |
| PPP4R1    | -0.094929663 | 0.071627497 | 0.109223706 |
| MMP3      | 0.094926537  | 0.07163688  | 0.10922965  |
| GPR88     | -0.094872088 | 0.07180051  | 0.109470767 |

|           |              |             |             |
|-----------|--------------|-------------|-------------|
| MGAT5B    | -0.094858427 | 0.071841613 | 0.109523009 |
| PTS       | 0.094857044  | 0.071845774 | 0.109523009 |
| CACNA1I   | -0.094844572 | 0.071883316 | 0.109571851 |
| PTK2      | 0.094813715  | 0.071976272 | 0.109705147 |
| GRRP1     | -0.094807583 | 0.071994754 | 0.109724919 |
| TMOD1     | -0.094795265 | 0.072031895 | 0.109773125 |
| PEG10     | 0.094781793  | 0.072072537 | 0.109826656 |
| LOC282997 | 0.094777076  | 0.072086771 | 0.109839942 |
| PAX5      | -0.094764961 | 0.072123339 | 0.109887254 |
| WHSC1     | -0.094753431 | 0.072158154 | 0.109929797 |
| SH2D1A    | -0.094752058 | 0.072162302 | 0.109929797 |
| CPNE2     | -0.094730455 | 0.072227575 | 0.110020816 |
| APBA2     | -0.094718189 | 0.072264656 | 0.110068882 |
| RASIP1    | -0.094695921 | 0.072332016 | 0.110159546 |
| SAMD7     | -0.094694854 | 0.072335244 | 0.110159546 |
| MET       | -0.094675281 | 0.072394499 | 0.110235828 |
| CERK      | -0.094674651 | 0.072396404 | 0.110235828 |
| SCARB1    | 0.094637911  | 0.072507737 | 0.11039691  |
| GNAI3     | -0.094597271 | 0.072631048 | 0.110576203 |
| ZNF528    | -0.094563195 | 0.072734574 | 0.110725351 |
| TMPRSS4   | -0.094550234 | 0.072773983 | 0.110776876 |
| DNAH6     | -0.094544916 | 0.072790156 | 0.110793027 |
| IRF5      | 0.09454108   | 0.072801824 | 0.110802318 |
| A4GALT    | -0.094516875 | 0.072875492 | 0.110905963 |
| SLC16A10  | 0.094502426  | 0.072919494 | 0.110964447 |
| ASAP1IT1  | -0.094450322 | 0.073078353 | 0.111197692 |
| SLC6A14   | 0.09440439   | 0.073218627 | 0.111402624 |
| OR5M8     | 0.09440062   | 0.073230148 | 0.111411642 |
| FGF5      | -0.094397943 | 0.073238331 | 0.111415581 |
| PBOV1     | -0.094388188 | 0.073268158 | 0.111444476 |
| CDH7      | -0.094388071 | 0.073268517 | 0.111444476 |
| OR8B2     | 0.094384401  | 0.07327974  | 0.111453033 |
| PNPLA6    | 0.094366446  | 0.073334672 | 0.111528064 |
| LOC150185 | 0.094350869  | 0.073382353 | 0.111592055 |
| ALOX15B   | -0.09431065  | 0.073505585 | 0.111770919 |
| LGR5      | 0.094291413  | 0.073564585 | 0.11184844  |
| TFAP2B    | 0.094290366  | 0.073567799 | 0.11184844  |
| NIPSNAP1  | 0.09428426   | 0.073586535 | 0.111868384 |
| HOXB1     | 0.094271008  | 0.07362721  | 0.111921677 |
| PTPN6     | 0.094263094  | 0.073651512 | 0.111950073 |
| MACROD1   | 0.09426091   | 0.073658221 | 0.111951726 |
| ALAS1     | -0.094247842 | 0.073698366 | 0.112004193 |
| NSL1      | 0.094229608  | 0.073754409 | 0.112080813 |
| PRR15L    | 0.094200945  | 0.073842575 | 0.112206233 |
| C1orf187  | -0.094185533 | 0.073890019 | 0.112269759 |
| CD160     | 0.094183132  | 0.073897413 | 0.112270309 |

|           |              |             |             |
|-----------|--------------|-------------|-------------|
| C1orf175  | -0.094181754 | 0.073901656 | 0.112270309 |
| F10       | 0.094140134  | 0.074029917 | 0.112456583 |
| MRPL34    | 0.094134186  | 0.074048261 | 0.112475869 |
| DCAKD     | -0.094105034 | 0.074138227 | 0.112603935 |
| GYG2      | 0.094073682  | 0.074235078 | 0.112742437 |
| KIAA1908  | -0.094066948 | 0.074255896 | 0.11276079  |
| ACCN1     | -0.094064543 | 0.07426333  | 0.11276079  |
| FBF1      | -0.094064278 | 0.074264148 | 0.11276079  |
| FOXD4L5   | -0.094060905 | 0.074274578 | 0.112768028 |
| LOC126536 | 0.094049444  | 0.074310026 | 0.112813247 |
| SMPDL3B   | 0.094045069  | 0.074323561 | 0.112825193 |
| TBKBP1    | 0.094035437  | 0.074353366 | 0.112861835 |
| SNORA41   | 0.09402238   | 0.074393783 | 0.112914579 |
| ZNF143    | -0.093974509 | 0.074542121 | 0.113131104 |
| TMEM105   | 0.093957311  | 0.074595472 | 0.113203446 |
| PI4KB     | 0.093947677  | 0.074625371 | 0.113240191 |
| ARHGEF4   | -0.093909673 | 0.074743415 | 0.113410674 |
| MSTO2P    | 0.093907655  | 0.074749687 | 0.113411551 |
| APOBEC1   | -0.093862637 | 0.074889722 | 0.113615359 |
| OR1J4     | -0.093852441 | 0.074921466 | 0.113654859 |
| CA12      | -0.093842218 | 0.074953307 | 0.113694502 |
| PGA3      | 0.093803781  | 0.075073122 | 0.113867572 |
| CCDC42    | -0.093784052 | 0.075134682 | 0.113951914 |
| SDS       | -0.093782293 | 0.075140172 | 0.113951914 |
| APOB      | -0.09377261  | 0.075170403 | 0.113989079 |
| PEBP1     | 0.093756886  | 0.075219513 | 0.114054865 |
| TMPRSS11B | 0.093746285  | 0.075252637 | 0.114096404 |
| GPR85     | -0.093723105 | 0.07532511  | 0.114197592 |
| CPN2      | -0.093700851 | 0.07539474  | 0.114294454 |
| LRRC67    | 0.093641594  | 0.075580401 | 0.114567185 |
| HIST1H2BL | 0.093637018  | 0.075594754 | 0.114580221 |
| FLNB      | -0.093633393 | 0.075606125 | 0.114588735 |
| NCRNA0011 | 0.093615257  | 0.075663041 | 0.114666271 |
| CANX      | -0.093599086 | 0.075713816 | 0.114734488 |
| NANOS2    | 0.093590269  | 0.075741511 | 0.114767724 |
| C10orf90  | -0.093581889 | 0.075767844 | 0.11479889  |
| LOC286002 | -0.093574183 | 0.075792065 | 0.114826853 |
| MLN       | 0.093568686  | 0.075809346 | 0.114844296 |
| LOC100188 | -0.093561509 | 0.075831915 | 0.114869748 |
| PKN3      | 0.093548217  | 0.075873724 | 0.11492434  |
| ZNF74     | 0.093544096  | 0.075886688 | 0.114935234 |
| EBI3      | 0.09353634   | 0.075911097 | 0.11496346  |
| SCARNA14  | 0.093506022  | 0.076006572 | 0.115099299 |
| LIPN      | -0.093495685 | 0.076039146 | 0.115139871 |
| GPR120    | -0.093468495 | 0.07612488  | 0.115259036 |
| DNM1      | 0.093467057  | 0.076129418 | 0.115259036 |

|           |              |             |             |
|-----------|--------------|-------------|-------------|
| ZSCAN22   | -0.093464148 | 0.076138596 | 0.115264168 |
| ANKS4B    | 0.093426862  | 0.076256312 | 0.115433601 |
| HOXB6     | -0.093421881 | 0.07627205  | 0.115448649 |
| GSTTP2    | -0.093407122 | 0.076318692 | 0.11551047  |
| CC2D1A    | -0.093394892 | 0.076357363 | 0.115560215 |
| ID3       | -0.093367956 | 0.076442587 | 0.115680404 |
| OR56A5    | 0.093343412  | 0.076520308 | 0.115789221 |
| CD177     | 0.093298674  | 0.076662143 | 0.115995029 |
| PPM1M     | 0.093287488  | 0.076697641 | 0.116039924 |
| USP54     | -0.09326857  | 0.076757704 | 0.116113626 |
| ENTPD8    | -0.093268472 | 0.076758016 | 0.116113626 |
| OR52E4    | -0.093244432 | 0.076834395 | 0.116220338 |
| TRIM43    | -0.093238656 | 0.076852755 | 0.116239281 |
| ENOPH1    | -0.093236196 | 0.076860576 | 0.116242283 |
| GULP1     | -0.09319796  | 0.076982223 | 0.116411387 |
| HOXD8     | 0.093197376  | 0.07698408  | 0.116411387 |
| ANK2      | -0.093193359 | 0.076996869 | 0.116421885 |
| NCCRP1    | 0.093183521  | 0.077028201 | 0.116460419 |
| ROM1      | 0.093175041  | 0.077055212 | 0.116492412 |
| RPL13P5   | -0.093149341 | 0.077137125 | 0.116607397 |
| ZNF805    | -0.093135097 | 0.077182556 | 0.116667218 |
| PGK1      | -0.093093576 | 0.077315109 | 0.116858712 |
| CPS1      | -0.093060552 | 0.077420666 | 0.117009378 |
| GRSF1     | -0.093051695 | 0.077448999 | 0.117043316 |
| GBP5      | -0.093017148 | 0.077559584 | 0.117201541 |
| MARVELD2  | -0.092991411 | 0.077642051 | 0.117317257 |
| SNORA27   | 0.09297241   | 0.077702979 | 0.117400412 |
| CA7       | 0.092931356  | 0.077834757 | 0.117590592 |
| CCDC115   | -0.092925928 | 0.077852191 | 0.11760801  |
| C7orf31   | 0.092888826  | 0.077971461 | 0.117779252 |
| SNORA62   | 0.092871011  | 0.078028782 | 0.117856898 |
| TRIM40    | 0.09283975   | 0.07812945  | 0.117996168 |
| GDF10     | 0.092838699  | 0.078132838 | 0.117996168 |
| EIF4ENIF1 | -0.092832446 | 0.078152986 | 0.118017647 |
| ZNF653    | 0.092779543  | 0.078323629 | 0.118266363 |
| CLP1      | 0.092736009  | 0.078464274 | 0.118469752 |
| NRG2      | -0.092728412 | 0.078488839 | 0.118497856 |
| CCKAR     | 0.09269331   | 0.078602422 | 0.118660343 |
| C3orf23   | -0.092635106 | 0.078791055 | 0.118936091 |
| OR11H4    | 0.09261699   | 0.078849841 | 0.119015809 |
| MYO18B    | 0.09260016   | 0.078904486 | 0.119089264 |
| GPR152    | -0.092590771 | 0.078934984 | 0.119123806 |
| NXPH4     | 0.092589431  | 0.078939336 | 0.119123806 |
| HS6ST3    | -0.092551526 | 0.079062566 | 0.119300728 |
| R3HDM1    | -0.092541729 | 0.07909444  | 0.119339782 |
| ADCY10    | -0.092523161 | 0.079154881 | 0.119421928 |

|           |              |             |             |
|-----------|--------------|-------------|-------------|
| FOXD4L6   | -0.092473702 | 0.079316061 | 0.119656038 |
| PECR      | -0.092463922 | 0.079347962 | 0.119695097 |
| BAIAP2L1  | 0.092445173  | 0.079409153 | 0.119778329 |
| FAHD1     | 0.092434085  | 0.079445355 | 0.119823861 |
| DDX50     | 0.092431211  | 0.079454742 | 0.119823971 |
| LHPP      | 0.092430378  | 0.079457462 | 0.119823971 |
| INCA1     | 0.092424813  | 0.07947564  | 0.119842308 |
| NCKAP1L   | -0.09240106  | 0.079553269 | 0.119950284 |
| FAM92A3   | -0.092395156 | 0.079572572 | 0.119970306 |
| SCIN      | -0.092385765 | 0.079603286 | 0.120007528 |
| MMP12     | 0.092377093  | 0.079631657 | 0.120041212 |
| CES2      | -0.092360887 | 0.079684698 | 0.120112077 |
| RNF26     | 0.092349537  | 0.079721861 | 0.120159    |
| HOXD1     | 0.092342965  | 0.079743387 | 0.120182349 |
| RAB3IP    | -0.09233651  | 0.079764535 | 0.120205125 |
| MEGF8     | -0.092333269 | 0.079775154 | 0.120212031 |
| ANKLE1    | 0.092317993  | 0.079825224 | 0.12027838  |
| RNF144A   | -0.09231042  | 0.079850054 | 0.120306689 |
| RAD51AP1  | 0.092281219  | 0.079945858 | 0.120441921 |
| SLC22A23  | 0.092247085  | 0.080057964 | 0.12060169  |
| NUDT16    | 0.092241466  | 0.080076432 | 0.120620387 |
| OR11H6    | 0.092221332  | 0.080142629 | 0.12071097  |
| SFXN3     | -0.092212471 | 0.080171778 | 0.120745743 |
| ST6GALNAC | 0.092208174  | 0.080185916 | 0.120757904 |
| TCP10L2   | 0.092197129  | 0.080222264 | 0.120797349 |
| ARHGAP11A | 0.092196529  | 0.08022424  | 0.120797349 |
| C1orf133  | -0.092181009 | 0.08027534  | 0.120852367 |
| SNX14     | -0.092180783 | 0.080276085 | 0.120852367 |
| IRAK2     | -0.092179903 | 0.080278984 | 0.120852367 |
| FSCN2     | -0.092147539 | 0.080385631 | 0.121003768 |
| KRT17     | 0.092131886  | 0.080437254 | 0.121072324 |
| RASGRP2   | -0.092108185 | 0.080515469 | 0.121173353 |
| UMOD      | 0.092107859  | 0.080516544 | 0.121173353 |
| SUSD1     | -0.092059205 | 0.080677301 | 0.121406109 |
| ZNF549    | -0.092055301 | 0.080690212 | 0.121416363 |
| ZNF670    | -0.092018965 | 0.080810452 | 0.121588105 |
| TAS1R3    | -0.091982465 | 0.080931381 | 0.121760856 |
| TTC26     | -0.091952138 | 0.08103197  | 0.121902982 |
| MIXL1     | 0.091941427  | 0.081067519 | 0.12194725  |
| PGA5      | 0.091910488  | 0.081170279 | 0.122092606 |
| SLC12A7   | -0.091904792 | 0.08118921  | 0.122111858 |
| GMIP      | -0.09190133  | 0.081200715 | 0.122119939 |
| NEK3      | 0.09189877   | 0.081209227 | 0.122123518 |
| NMU       | 0.091885869  | 0.081252122 | 0.122178798 |
| DDB1      | -0.091855439 | 0.081353378 | 0.122321821 |
| PARD6A    | 0.091849973  | 0.081371576 | 0.122339947 |



|           |              |             |             |
|-----------|--------------|-------------|-------------|
| LOC642852 | -0.091846656 | 0.081382621 | 0.122347316 |
| LOC100130 | 0.091842841  | 0.081395326 | 0.1223518   |
| DARS      | -0.091842071 | 0.081397891 | 0.1223518   |
| TNFRSF19  | -0.091839795 | 0.081405472 | 0.12235396  |
| ACTR6     | 0.091776164  | 0.081617638 | 0.122663592 |
| PAK1      | 0.091722335  | 0.081797472 | 0.122924588 |
| CST1      | 0.091716455  | 0.081817133 | 0.122944859 |
| CHRD      | 0.091709954  | 0.081838879 | 0.122968256 |
| GGA3      | 0.091705269  | 0.081854553 | 0.122982528 |
| TPRX1     | 0.091666218  | 0.081985287 | 0.123169658 |
| SEC61A1   | 0.091648984  | 0.082043036 | 0.12324712  |
| KIAA0020  | 0.091641035  | 0.082069686 | 0.123277854 |
| USP19     | -0.091563424 | 0.082330231 | 0.123659896 |
| ZMIZ2     | -0.091524225 | 0.082462077 | 0.123848586 |
| RNF32     | 0.091476076  | 0.08262426  | 0.124082809 |
| SPATA5    | -0.09146871  | 0.082649094 | 0.124110746 |
| SNORA13   | 0.091420461  | 0.082811913 | 0.124345868 |
| FLJ46361  | 0.091418385  | 0.082818925 | 0.124347022 |
| ECHDC2    | -0.091394677 | 0.08289903  | 0.124457911 |
| HIST1H2BM | 0.091381695  | 0.082942918 | 0.124514414 |
| C1QB      | 0.09136072   | 0.08301387  | 0.124611534 |
| MDGA2     | 0.091356523  | 0.083028074 | 0.124623462 |
| CPA5      | 0.091353565  | 0.083038084 | 0.124629093 |
| OR1K1     | -0.0913376   | 0.083092135 | 0.124694016 |
| ABHD10    | 0.09133709   | 0.083093863 | 0.124694016 |
| MAGEB3    | 0.091333263  | 0.083106823 | 0.124704068 |
| CCL4L2    | 0.091300593  | 0.083217533 | 0.124860783 |
| PRODH     | -0.091293343 | 0.083242119 | 0.124888263 |
| TEKT1     | -0.091289348 | 0.083255668 | 0.124899181 |
| C11orf16  | -0.091276964 | 0.083297679 | 0.124940423 |
| KIF17     | -0.091275814 | 0.083301582 | 0.124940423 |
| LOC402644 | 0.091275697  | 0.08330198  | 0.124940423 |
| NT5DC3    | 0.091253234  | 0.083378232 | 0.125028847 |
| UCMA      | 0.091253149  | 0.083378522 | 0.125028847 |
| PLAGL2    | -0.091252781 | 0.08337977  | 0.125028847 |
| ZRANB2    | -0.09124995  | 0.083389384 | 0.12503385  |
| ESX1      | 0.091229194  | 0.083459903 | 0.125130163 |
| FOXA1     | -0.091221929 | 0.083484594 | 0.12515776  |
| TCL6      | 0.091203784  | 0.083546293 | 0.125233993 |
| RWDD2B    | -0.091203276 | 0.08354802  | 0.125233993 |
| ALDH1L1   | 0.091195352  | 0.083574978 | 0.125264972 |
| LRP10     | -0.091163606 | 0.083683046 | 0.125417509 |
| TCERG1L   | -0.091111916 | 0.083859242 | 0.125667495 |
| CAPN11    | -0.091110971 | 0.083862466 | 0.125667495 |
| PMFBP1    | 0.091089095  | 0.083937129 | 0.125769913 |
| DUOX2     | -0.091058937 | 0.084040143 | 0.125914795 |

|            |              |             |             |
|------------|--------------|-------------|-------------|
| PDGFA      | -0.091051036 | 0.08406715  | 0.125945783 |
| OR4D1      | -0.091017184 | 0.084182935 | 0.12610976  |
| C10orf107  | -0.09101448  | 0.084192188 | 0.126114136 |
| UBTFL1     | 0.091005482  | 0.084222991 | 0.126150787 |
| PEX14      | 0.090991804  | 0.084269828 | 0.126211448 |
| DNAJC21    | -0.090988199 | 0.084282177 | 0.126220451 |
| PRO0628    | -0.09097807  | 0.084316879 | 0.126262926 |
| AAGAB      | 0.090959622  | 0.084380112 | 0.126348116 |
| GLYATL2    | 0.090920627  | 0.0845139   | 0.126538931 |
| 43894      | -0.090916029 | 0.084529688 | 0.126553055 |
| ZNF772     | -0.090903679 | 0.084572103 | 0.126598471 |
| STARD3NL   | 0.090903494  | 0.084572737 | 0.126598471 |
| TMEM99     | 0.090886741  | 0.0846303   | 0.126675117 |
| ZNF22      | -0.090851603 | 0.084751135 | 0.126840456 |
| TTL11      | 0.090850916  | 0.0847535   | 0.126840456 |
| BCAR4      | 0.090845659  | 0.084771589 | 0.126854129 |
| COL5A3     | -0.090844559 | 0.084775376 | 0.126854129 |
| DPP6       | 0.090824808  | 0.084843372 | 0.126946338 |
| FAM22D     | -0.090820867 | 0.084856944 | 0.126957106 |
| CXorf40B   | 0.090802613  | 0.084919835 | 0.127041656 |
| MPP6       | 0.090770604  | 0.085030208 | 0.127195978 |
| HMGCS2     | -0.090768994 | 0.085035765 | 0.127195978 |
| SPATA20    | -0.090752284 | 0.085093432 | 0.127272678 |
| MYBBP1A    | 0.090747363  | 0.08511042  | 0.127288527 |
| ENTPD3     | -0.090732993 | 0.085160044 | 0.127353178 |
| BEX1       | 0.090698585  | 0.085278963 | 0.127521441 |
| DUSP8      | -0.090681439 | 0.085338275 | 0.127600552 |
| TRIM49L    | 0.090677216  | 0.085352888 | 0.12761282  |
| PPP1R3C    | -0.090665365 | 0.085393906 | 0.127664563 |
| BMP6       | 0.090630419  | 0.085514952 | 0.127835931 |
| NUDT9      | -0.090618202 | 0.085557302 | 0.12788964  |
| CCL18      | -0.090604106 | 0.085606185 | 0.127953105 |
| MAL        | 0.090601927  | 0.085613744 | 0.1279548   |
| LUZP4      | 0.09059186   | 0.085648673 | 0.127997397 |
| PLD4       | -0.090577768 | 0.085697588 | 0.128060888 |
| TRIM46     | 0.09055683   | 0.085770302 | 0.128159931 |
| LPAL2      | -0.090553807 | 0.085780807 | 0.128166011 |
| DKFZp434L1 | 0.090541509  | 0.085823543 | 0.128220245 |
| NPSR1      | 0.090504354  | 0.085952767 | 0.128403673 |
| C21orf67   | 0.090492068  | 0.085995532 | 0.128457922 |
| L1TD1      | -0.09048435  | 0.086022403 | 0.128488424 |
| PCBP3      | -0.090478296 | 0.08604349  | 0.128510282 |
| MRPL35     | -0.090453825 | 0.086128757 | 0.128627986 |
| IDI1       | 0.090450259  | 0.086141186 | 0.128636902 |
| DPF2       | 0.090442918  | 0.086166781 | 0.128665475 |
| GDPD2      | -0.090440181 | 0.086176326 | 0.128670081 |

|           |              |             |             |
|-----------|--------------|-------------|-------------|
| TPD52     | 0.090434683  | 0.086195501 | 0.128689062 |
| ATP1B3    | 0.090432578  | 0.086202845 | 0.128690379 |
| RWDD2A    | 0.090403158  | 0.086305517 | 0.128833998 |
| CD99L2    | -0.090385628 | 0.086366741 | 0.128915728 |
| FBXO10    | -0.090383215 | 0.086375171 | 0.128918648 |
| LRAT      | -0.090355425 | 0.086472309 | 0.129050783 |
| IMPA1     | -0.09035418  | 0.086476661 | 0.129050783 |
| OR6W1P    | 0.090351861  | 0.086484771 | 0.129053216 |
| SFRS6     | -0.090327128 | 0.086571306 | 0.129172665 |
| GSTM4     | 0.090313617  | 0.086618609 | 0.129233563 |
| OPLAH     | -0.090306137 | 0.086644807 | 0.129262966 |
| LYPD6     | -0.090298033 | 0.086673195 | 0.129295632 |
| VNN3      | 0.090287364  | 0.086710579 | 0.12934171  |
| C14orf182 | -0.090283745 | 0.086723265 | 0.129350945 |
| APOA5     | -0.090227192 | 0.086921672 | 0.129637168 |
| LDLRAP1   | -0.090217665 | 0.086955133 | 0.129677361 |
| SERTAD1   | 0.090184951  | 0.087070107 | 0.1298391   |
| RAB33A    | 0.090173279  | 0.087111157 | 0.129890588 |
| SNORA42   | 0.090147788  | 0.087200865 | 0.130014617 |
| ITGA5     | -0.090119447 | 0.08730069  | 0.130153709 |
| BZRAP1    | -0.090109926 | 0.087334248 | 0.130193992 |
| MAN2B1    | 0.090104664  | 0.087352798 | 0.130211899 |
| EARS2     | -0.090087767 | 0.087412386 | 0.130290971 |
| ZNF200    | -0.09007051  | 0.087473277 | 0.130371974 |
| RAMP1     | 0.090063499  | 0.087498024 | 0.130399099 |
| EGOT      | -0.090061271 | 0.087505888 | 0.13040106  |
| LSM14A    | -0.090022437 | 0.08764308  | 0.130595731 |
| RSPO4     | 0.089990431  | 0.087756279 | 0.130751992 |
| SNORA6    | 0.089989075  | 0.087761079 | 0.130751992 |
| CD2AP     | 0.089973078  | 0.087817703 | 0.130826567 |
| LRRFIP2   | -0.089934573 | 0.08795412  | 0.131019994 |
| TMIGD1    | 0.089888217  | 0.088118578 | 0.131255159 |
| CES4      | -0.089885248 | 0.08812912  | 0.131261045 |
| C1orf183  | -0.089858919 | 0.088222646 | 0.131390517 |
| HIF0      | -0.089851409 | 0.088249341 | 0.131420446 |
| CLIC2     | -0.089813737 | 0.088383329 | 0.131610139 |
| C15orf48  | 0.089793399  | 0.088455735 | 0.131708109 |
| NLK       | -0.089783105 | 0.088492403 | 0.131752856 |
| FOXF2     | -0.089747807 | 0.088618221 | 0.131923649 |
| CCNH      | 0.089747206  | 0.088620366 | 0.131923649 |
| FOLR1     | 0.089733164  | 0.088670459 | 0.131988354 |
| HECTD3    | -0.089723703 | 0.088704221 | 0.132028742 |
| SPAG11A   | 0.089718801  | 0.08872172  | 0.132044919 |
| HSPA5     | 0.089704369  | 0.088773252 | 0.13211174  |
| SHD       | 0.089695883  | 0.088803565 | 0.132146978 |
| IPO9      | -0.089681868 | 0.088853647 | 0.132211624 |

|           |              |             |             |
|-----------|--------------|-------------|-------------|
| C5orf35   | -0.089676557 | 0.088872629 | 0.132229989 |
| LGI3      | 0.08966579   | 0.088911124 | 0.132274504 |
| RETN      | 0.089664474  | 0.088915831 | 0.132274504 |
| PVRL1     | -0.089647933 | 0.088974999 | 0.132352637 |
| USH1G     | 0.089644405  | 0.088987622 | 0.132354591 |
| TREML4    | 0.089643852  | 0.088989605 | 0.132354591 |
| CCL5      | 0.089608125  | 0.089117527 | 0.132534952 |
| MAGEB4    | 0.089524685  | 0.089416864 | 0.132970195 |
| BCDIN3D   | 0.089499159  | 0.089508598 | 0.133096672 |
| UCP2      | 0.089484801  | 0.089560231 | 0.133163506 |
| CCNL2     | -0.089476816 | 0.089588958 | 0.133193636 |
| SERPINE2  | -0.08947545  | 0.089593871 | 0.133193636 |
| NAGS      | 0.0894697    | 0.089614561 | 0.13321445  |
| SSX5      | 0.089466319  | 0.089626728 | 0.133222593 |
| RBM5      | -0.089420777 | 0.089790757 | 0.133456446 |
| HS3ST2    | -0.089377864 | 0.089945538 | 0.133676522 |
| C16orf71  | -0.089354589 | 0.090029575 | 0.133791433 |
| RIMS2     | 0.089333615  | 0.09010536  | 0.133894064 |
| ZNF563    | 0.0893156    | 0.090170493 | 0.133980852 |
| NXF2B     | 0.089302628  | 0.090217417 | 0.134040575 |
| ORAI3     | 0.089293286  | 0.09025122  | 0.134080795 |
| PTH2      | 0.089283526  | 0.09028655  | 0.134123277 |
| FEZF2     | 0.089245626  | 0.090423843 | 0.13431721  |
| NCRNA0016 | -0.089201245 | 0.090584824 | 0.134546298 |
| SC4MOL    | -0.08919191  | 0.090618713 | 0.134586596 |
| CHRM4     | -0.089186918 | 0.090636842 | 0.134603484 |
| C1orf26   | -0.089175574 | 0.090678043 | 0.134654629 |
| SERPINA5  | -0.089140531 | 0.090805422 | 0.134833729 |
| LRRC37A   | -0.089121437 | 0.090874886 | 0.134926813 |
| SLC22A7   | -0.089108346 | 0.090922536 | 0.134987498 |
| TDRD10    | -0.089031504 | 0.09120264  | 0.135392545 |
| LRP2      | 0.089029773  | 0.091208957 | 0.135392545 |
| CDO1      | -0.089001593 | 0.091311857 | 0.13553519  |
| GNPTG     | 0.088949551  | 0.091502135 | 0.135807498 |
| PLRG1     | 0.088931859  | 0.091566893 | 0.135893485 |
| KRTAP5-1  | -0.08891862  | 0.091615375 | 0.135955304 |
| RNU4ATAC  | 0.088913299  | 0.091634866 | 0.135974097 |
| SIGLEC14  | -0.088908564 | 0.091652214 | 0.135989706 |
| DUSP27    | -0.088882855 | 0.091746454 | 0.136119394 |
| KIAA1949  | -0.088879971 | 0.091757029 | 0.136124942 |
| TMEM151A  | 0.088872637  | 0.09178393  | 0.136154709 |
| COL6A4P2  | -0.088867093 | 0.091804269 | 0.136174738 |
| GFRA4     | 0.088854788  | 0.091849423 | 0.136231567 |
| PCSK7     | -0.088841402 | 0.091898566 | 0.136294306 |
| IL17RC    | -0.088827969 | 0.091947901 | 0.13635732  |
| C12orf24  | 0.088818475  | 0.091982783 | 0.136398011 |

|          |              |             |             |
|----------|--------------|-------------|-------------|
| ST3GAL4  | 0.088816773  | 0.091989037 | 0.136398011 |
| TTR      | 0.088797147  | 0.092061183 | 0.136490593 |
| ZNF468   | -0.088795464 | 0.092067372 | 0.136490593 |
| NIPAL4   | -0.088794195 | 0.092072038 | 0.136490593 |
| PXN      | -0.088785282 | 0.092104819 | 0.136529026 |
| IGSF8    | 0.088778527  | 0.09212967  | 0.136555699 |
| LPPR5    | 0.088738138  | 0.092278372 | 0.136765928 |
| TTC25    | -0.088730106 | 0.092307965 | 0.1367934   |
| MFSD11   | -0.088729379 | 0.092310645 | 0.1367934   |
| MADCAM1  | -0.088723029 | 0.092334047 | 0.136817898 |
| ACVRL1   | -0.088716807 | 0.092356981 | 0.136841699 |
| TACR2    | 0.088687163  | 0.092466318 | 0.136993508 |
| PCSK4    | -0.088682795 | 0.09248244  | 0.137003233 |
| TEC      | -0.088681656 | 0.092486642 | 0.137003233 |
| MYOT     | -0.088663718 | 0.092552864 | 0.137091133 |
| SNAR-G1  | 0.08865358   | 0.092590309 | 0.137131686 |
| PMS2L2   | -0.088652577 | 0.092594014 | 0.137131686 |
| H2BFWT   | 0.088650554  | 0.092601487 | 0.137132556 |
| OR4F17   | -0.088591256 | 0.092820764 | 0.137447061 |
| C15orf39 | 0.088552572  | 0.092964038 | 0.137648982 |
| OPRD1    | 0.088541688  | 0.09300438  | 0.137698477 |
| ZNF600   | 0.088537267  | 0.09302077  | 0.137712506 |
| LIPT1    | 0.088526141  | 0.093062029 | 0.137763347 |
| SH3TC1   | -0.088492581 | 0.093186573 | 0.137937462 |
| TMEM167A | -0.08848701  | 0.09320726  | 0.137957828 |
| SEC14L5  | -0.088483888 | 0.093218855 | 0.137964737 |
| FAM115C  | -0.088479982 | 0.093233362 | 0.137975953 |
| PRDXDD1P | 0.088462463  | 0.093298456 | 0.138055453 |
| TSPYL2   | 0.088461793  | 0.093300946 | 0.138055453 |
| KRTAP5-5 | 0.088453119  | 0.093333188 | 0.138092901 |
| TXLNB    | -0.088414837 | 0.093475596 | 0.138293329 |
| EN2      | -0.088377226 | 0.09361568  | 0.138490288 |
| HS6ST1   | -0.088370914 | 0.093639204 | 0.1385148   |
| PLIN2    | -0.088367045 | 0.093653624 | 0.13852584  |
| NWD1     | -0.088360229 | 0.093679039 | 0.138553142 |
| KCNJ1    | -0.088336604 | 0.093767161 | 0.138673178 |
| DAPK2    | 0.088318539  | 0.093834589 | 0.138762593 |
| RABL2A   | -0.088279532 | 0.093980317 | 0.138967777 |
| SKINTL   | -0.088249871 | 0.094091252 | 0.139121486 |
| NPHS2    | 0.08823243   | 0.094156533 | 0.139207672 |
| MNX1     | 0.088211558  | 0.0942347   | 0.139312898 |
| LRRC52   | 0.088207064  | 0.094251535 | 0.139327444 |
| ANKRD9   | -0.088201216 | 0.094273449 | 0.139348429 |
| SPINT2   | -0.088199542 | 0.094279725 | 0.139348429 |
| LGR6     | -0.088145689 | 0.094481725 | 0.139636627 |
| SMCR5    | -0.088123436 | 0.094565298 | 0.139749771 |

|           |              |             |             |
|-----------|--------------|-------------|-------------|
| FLJ42393  | 0.088113016  | 0.094604448 | 0.139797253 |
| IRAK1     | 0.088107045  | 0.094626891 | 0.139813072 |
| WHSC2     | 0.088106432  | 0.094629194 | 0.139813072 |
| CKB       | 0.088098706  | 0.094658241 | 0.139845614 |
| TBX2      | -0.088096688 | 0.094665829 | 0.13984645  |
| RNU6ATAC  | 0.088066987  | 0.094777558 | 0.140001117 |
| DYRK1B    | 0.08806139   | 0.094798625 | 0.14002185  |
| C12orf23  | -0.088058634 | 0.094808997 | 0.140022723 |
| ADAD2     | -0.088057497 | 0.094813277 | 0.140022723 |
| GSTM2P1   | -0.088040961 | 0.094875549 | 0.140104297 |
| C1QTNF8   | 0.088027624  | 0.094925793 | 0.1401681   |
| EVPL      | 0.087989642  | 0.095069008 | 0.140369165 |
| SLC38A8   | 0.087982807  | 0.095094796 | 0.140396832 |
| SLC9A5    | -0.08797287  | 0.095132302 | 0.140441794 |
| OTP       | 0.087964831  | 0.095162649 | 0.140476181 |
| SULT2B1   | 0.087959005  | 0.095184651 | 0.140498246 |
| VEGFA     | -0.087939008 | 0.095260192 | 0.140599327 |
| SLC7A11   | 0.08785821   | 0.095565906 | 0.141035279 |
| FGF23     | -0.087856641 | 0.095571852 | 0.141035279 |
| GPR52     | -0.087855333 | 0.095576808 | 0.141035279 |
| CBX1      | 0.087850569  | 0.095594857 | 0.141051461 |
| IL1RN     | 0.087828488  | 0.095678561 | 0.141164509 |
| PRAMEF11  | -0.087790292 | 0.095823491 | 0.141367865 |
| LOC285768 | -0.087747899 | 0.095984551 | 0.141585092 |
| LOC646813 | 0.087747793  | 0.095984952 | 0.141585092 |
| C9orf125  | 0.087710444  | 0.096127027 | 0.141784162 |
| HOXD13    | 0.087692535  | 0.096195212 | 0.141874225 |
| DNAJB1    | 0.087679411  | 0.096245204 | 0.141937443 |
| VSIG10L   | 0.087672939  | 0.096269867 | 0.141963303 |
| IGFBP4    | -0.087646921 | 0.096369055 | 0.142099047 |
| CYP11A1   | -0.087619356 | 0.096474231 | 0.1422436   |
| NOG       | -0.087575009 | 0.096643629 | 0.142482815 |
| ACE2      | -0.087532416 | 0.096806554 | 0.142712452 |
| TBX4      | 0.087521919  | 0.096846736 | 0.142761121 |
| LILRB1    | -0.087504355 | 0.096914009 | 0.142849714 |
| SUPT16H   | -0.087448661 | 0.097127561 | 0.143153892 |
| PATE1     | 0.087413308  | 0.097263313 | 0.143343364 |
| C17orf48  | 0.08739307   | 0.097341091 | 0.143447376 |
| COQ2      | -0.08738352  | 0.097377812 | 0.143490871 |
| CCL17     | 0.087345335  | 0.097524746 | 0.143696753 |
| PCDHA4    | -0.087336503 | 0.097558757 | 0.143736231 |
| LYPLA1    | -0.087308689 | 0.097665922 | 0.143880765 |
| CLCA4     | 0.08730669   | 0.097673628 | 0.143880765 |
| LOC645332 | 0.087305419  | 0.097678531 | 0.143880765 |
| CAV3      | -0.087296358 | 0.097713464 | 0.143921576 |
| TRIM17    | 0.087282872  | 0.097765481 | 0.143987543 |

|           |              |             |             |
|-----------|--------------|-------------|-------------|
| BTBD2     | 0.087262598  | 0.097843718 | 0.144092114 |
| APOBEC3A  | 0.087243691  | 0.097916726 | 0.144188968 |
| MAGED4B   | 0.087226753  | 0.097982167 | 0.144274665 |
| PTCD1     | 0.087215448  | 0.098025867 | 0.144328341 |
| SLC35F4   | -0.087171799 | 0.098194729 | 0.144566276 |
| A2BP1     | 0.087160457  | 0.098238644 | 0.144620239 |
| TSC22D4   | 0.08713136   | 0.098351378 | 0.144775497 |
| CTSC      | 0.087125946  | 0.098372366 | 0.144795688 |
| PARP6     | -0.087123878 | 0.098380382 | 0.144796786 |
| LOC100189 | 0.087120636  | 0.098392953 | 0.144804585 |
| ZSCAN18   | 0.087117941  | 0.098403403 | 0.144809264 |
| EZR       | -0.087115895 | 0.098411338 | 0.14481024  |
| GPR55     | -0.087103243 | 0.09846041  | 0.144871745 |
| TRPV5     | -0.087095463 | 0.098490598 | 0.144905456 |
| CCDC36    | -0.087039216 | 0.098709062 | 0.145215009 |
| DUSP21    | 0.087037539  | 0.098715581 | 0.145215009 |
| ALS2CR12  | -0.086993347 | 0.098887499 | 0.145457164 |
| ITFG3     | 0.086979011  | 0.098943323 | 0.145527372 |
| HLA-DQB1  | 0.086977337  | 0.098949844 | 0.145527372 |
| EFCAB1    | -0.086973562 | 0.098964546 | 0.145538247 |
| ABCC6P1   | -0.086931931 | 0.099126822 | 0.145766127 |
| SYNPR     | 0.086910891  | 0.099208914 | 0.145876072 |
| TRIM60    | 0.086899546  | 0.099253201 | 0.145930417 |
| POLR3E    | -0.086849216 | 0.099449868 | 0.146208779 |
| LEF1      | 0.086845868  | 0.099462958 | 0.14621723  |
| MOCS3     | 0.086826421  | 0.09953904  | 0.146318275 |
| SPC24     | 0.086820231  | 0.099563265 | 0.146340959 |
| HOXC11    | 0.086818723  | 0.099569169 | 0.146340959 |
| SV2B      | -0.086808408 | 0.099609552 | 0.146389508 |
| ZNF513    | 0.086790461  | 0.099679844 | 0.146482002 |
| TNMD      | -0.086763848 | 0.099784152 | 0.146624465 |
| CPA3      | -0.086734382 | 0.099899737 | 0.146783479 |
| VPS18     | 0.086732321  | 0.09990783  | 0.146784539 |
| OR4K14    | 0.086707453  | 0.100005468 | 0.14691715  |
| IGSF5     | -0.086663104 | 0.100179791 | 0.147162391 |
| KCNE3     | 0.086655203  | 0.100210872 | 0.147186711 |
| C21orf15  | 0.086655137  | 0.100211128 | 0.147186711 |
| GLB1      | -0.086652876 | 0.100220025 | 0.147188923 |
| OPN1SW    | 0.086642757  | 0.100259845 | 0.147236547 |
| DMRTB1    | 0.086620531  | 0.100347355 | 0.147354193 |
| TAS2R1    | 0.086597941  | 0.100436359 | 0.147471387 |
| SGK2      | -0.086596516 | 0.100441973 | 0.147471387 |
| METTL11B  | 0.08658892   | 0.100471919 | 0.147504479 |
| C18orf16  | -0.086574045 | 0.100530575 | 0.147579714 |
| WARS      | 0.086569138  | 0.100549931 | 0.147597248 |
| GSG2      | 0.08656311   | 0.100573713 | 0.147621278 |

|           |              |             |             |
|-----------|--------------|-------------|-------------|
| CES1      | 0.086523979  | 0.100728204 | 0.147837143 |
| FUT7      | 0.086510603  | 0.100781054 | 0.147903809 |
| CEACAM6   | -0.08650094  | 0.100819249 | 0.14794896  |
| MUC15     | 0.086474464  | 0.10092396  | 0.148091709 |
| SDF4      | -0.086439023 | 0.101064261 | 0.148286654 |
| KRTAP3-1  | 0.08643667   | 0.101073579 | 0.148289401 |
| SEMG1     | -0.086422565 | 0.101129465 | 0.148360464 |
| SNORA66   | -0.086416988 | 0.101151569 | 0.14838196  |
| TEX261    | -0.086376844 | 0.101310784 | 0.148601506 |
| IKBKE     | 0.08637549   | 0.101316156 | 0.148601506 |
| C11orf84  | 0.08633335   | 0.101483508 | 0.148836001 |
| SYTL1     | 0.086316893  | 0.101548921 | 0.148920969 |
| BMF       | 0.086288044  | 0.101663674 | 0.149078276 |
| SEMA3A    | -0.08626651  | 0.101749397 | 0.149192994 |
| CLDN25    | -0.086245799 | 0.1018319   | 0.149302974 |
| PRCD      | -0.086217579 | 0.101944397 | 0.14945691  |
| CLPS      | 0.086213867  | 0.101959201 | 0.14946761  |
| FZD5      | -0.086193545 | 0.102040287 | 0.149575468 |
| NFRKB     | -0.086188719 | 0.10205955  | 0.149592695 |
| HCG4      | -0.086186208 | 0.102069571 | 0.149596373 |
| CPA4      | -0.086179028 | 0.102098239 | 0.149627377 |
| OR13C5    | 0.086166356  | 0.102148849 | 0.149690532 |
| RBMV2FP   | 0.086153695  | 0.102199432 | 0.149753637 |
| RND2      | 0.086141438  | 0.102248423 | 0.149814401 |
| LRRC30    | 0.086133789  | 0.102279005 | 0.149848186 |
| SLC23A1   | 0.086110772  | 0.102371072 | 0.149972039 |
| TMEFF2    | 0.086059152  | 0.10257779  | 0.150263823 |
| LOC285501 | 0.086052738  | 0.102603502 | 0.150290434 |
| IL8       | -0.086025995 | 0.102710746 | 0.150436457 |
| GALR3     | 0.085968241  | 0.102942662 | 0.150765047 |
| RG9MTD3   | -0.085945974 | 0.103032183 | 0.15088506  |
| UBE2NL    | -0.085932154 | 0.103087778 | 0.150955375 |
| C1QL2     | -0.08592239  | 0.10312707  | 0.150993385 |
| SCARNA12  | 0.085921936  | 0.103128899 | 0.150993385 |
| ULBP2     | -0.085884915 | 0.103277991 | 0.151200558 |
| GLYATL3   | -0.085853827 | 0.10340332  | 0.151369886 |
| NGF       | -0.085852455 | 0.103408852 | 0.151369886 |
| EDARADD   | 0.085848493  | 0.103424833 | 0.151382151 |
| NUFIP1    | 0.085814298  | 0.103562849 | 0.151573024 |
| C1GALT1C1 | -0.085797463 | 0.103630853 | 0.151661408 |
| GPNMB     | -0.085764227 | 0.103765209 | 0.151846876 |
| NKX3-2    | 0.085756908  | 0.103794811 | 0.151879034 |
| NDN       | 0.085746779  | 0.103835793 | 0.151927839 |
| ARF3      | -0.085723243 | 0.103931074 | 0.152053126 |
| LPCAT4    | 0.085721856  | 0.103936691 | 0.152053126 |
| FAM108C1  | -0.085701234 | 0.104020233 | 0.152164165 |



|           |              |             |             |
|-----------|--------------|-------------|-------------|
| PDCD1     | 0.085686477  | 0.104080045 | 0.152240477 |
| ARMC2     | -0.085676413 | 0.104120855 | 0.152288986 |
| TMSB15A   | 0.085669794  | 0.104147702 | 0.152317066 |
| ZNF57     | -0.085659312 | 0.104190227 | 0.152368069 |
| HAL       | -0.085652606 | 0.104217439 | 0.152396674 |
| TPM1      | -0.085646778 | 0.104241093 | 0.15241747  |
| NPTX2     | -0.085645331 | 0.104246968 | 0.15241747  |
| FLNC      | 0.08563334   | 0.104295652 | 0.152477456 |
| PRKRA     | 0.085629069  | 0.104312996 | 0.152491619 |
| GPR32     | 0.085620602  | 0.104347388 | 0.152530698 |
| KIF1C     | -0.085601684 | 0.104424268 | 0.152631874 |
| HCFC1     | -0.085589322 | 0.104474524 | 0.152694126 |
| ADCY2     | -0.085586861 | 0.104484534 | 0.152696253 |
| C5orf27   | -0.085585193 | 0.104491315 | 0.152696253 |
| SCARNA15  | 0.085571851  | 0.104545586 | 0.152764351 |
| IVNS1ABP  | -0.08555742  | 0.104604314 | 0.152838952 |
| YJEFN3    | 0.085547368  | 0.104645236 | 0.152887197 |
| RASSF4    | 0.085545538  | 0.104652688 | 0.152887197 |
| NCRNA0018 | 0.085533019  | 0.104703673 | 0.152950463 |
| TBX6      | 0.085516337  | 0.104771641 | 0.153038523 |
| FAAH2     | -0.085501673 | 0.104831421 | 0.153114613 |
| USP29     | 0.085492808  | 0.104867572 | 0.153156182 |
| KRTAP4-12 | 0.085454212  | 0.105025076 | 0.153374965 |
| FAM9B     | -0.085451747 | 0.105035141 | 0.153378415 |
| CTNS      | 0.085436838  | 0.105096037 | 0.153452197 |
| ATP1A4    | -0.085435605 | 0.105101078 | 0.153452197 |
| CCDC65    | 0.085429176  | 0.105127345 | 0.153479296 |
| CYP4F11   | -0.085386331 | 0.105302546 | 0.153723809 |
| FRMPD2L1  | -0.085363275 | 0.105396919 | 0.1538503   |
| LOC285847 | 0.085352958  | 0.105439172 | 0.153896001 |
| ENOSF1    | -0.085351857 | 0.105443682 | 0.153896001 |
| RPS6KC1   | -0.085349402 | 0.105453739 | 0.1538994   |
| RNF17     | 0.08532273   | 0.105563043 | 0.154043758 |
| MMP23A    | -0.085321491 | 0.105568125 | 0.154043758 |
| ADI1      | 0.08526711   | 0.105791273 | 0.154358063 |
| C6orf227  | 0.085251847  | 0.105853968 | 0.154438225 |
| FUZ       | -0.085247867 | 0.105870325 | 0.154450774 |
| KIAA1797  | -0.0852198   | 0.105985708 | 0.154607777 |
| LOC283761 | -0.085217034 | 0.105997083 | 0.154613046 |
| LOC201651 | -0.085206229 | 0.106041534 | 0.154666556 |
| CCDC144NL | 0.085203793  | 0.106051555 | 0.154669843 |
| WDR88     | -0.085199717 | 0.10606833  | 0.154682981 |
| C19orf41  | 0.085196397  | 0.106081993 | 0.154691579 |
| CCDC87    | -0.085174778 | 0.106171002 | 0.154810038 |
| CAB39L    | -0.085164884 | 0.106211756 | 0.154850188 |
| USP40     | -0.085164318 | 0.106214089 | 0.154850188 |

|           |              |             |             |
|-----------|--------------|-------------|-------------|
| SKIV2L2   | -0.085150075 | 0.106272778 | 0.15492441  |
| KRT1      | -0.085141689 | 0.106307346 | 0.15496346  |
| RNF24     | 0.085109554  | 0.106439893 | 0.155145317 |
| SCN2A     | -0.085105733 | 0.106455662 | 0.155156946 |
| C2orf18   | 0.085081479  | 0.106555801 | 0.155291531 |
| TPTE2     | 0.085049473  | 0.106688055 | 0.155472898 |
| CDRT4     | 0.084997381  | 0.106903591 | 0.155775592 |
| CSNK1A1P  | -0.084976379 | 0.106990588 | 0.155890954 |
| RIPK4     | -0.084970988 | 0.107012927 | 0.155912096 |
| MLC1      | -0.084957109 | 0.107070456 | 0.155984501 |
| CLDN14    | -0.084924123 | 0.107207286 | 0.156172417 |
| NTS       | 0.084915386  | 0.107243551 | 0.156213818 |
| HCN4      | -0.084908634 | 0.107271584 | 0.156242973 |
| GYPB      | -0.084906785 | 0.107279257 | 0.156242973 |
| DSE       | -0.084894898 | 0.107328629 | 0.156303448 |
| PSG8      | -0.084879753 | 0.107391551 | 0.156383646 |
| ZNF763    | -0.08486724  | 0.107443564 | 0.156447947 |
| IFI6      | 0.084859384  | 0.10747623  | 0.15648407  |
| SETD6     | 0.084839904  | 0.107557258 | 0.156590598 |
| MYB       | 0.08483412   | 0.107581327 | 0.15661419  |
| MAGEC1    | 0.08481935   | 0.107642806 | 0.156692236 |
| IL18      | 0.084817188  | 0.107651808 | 0.156693887 |
| MST1      | 0.084799885  | 0.107723871 | 0.156787319 |
| VENTXP1   | 0.084778287  | 0.107813875 | 0.156897106 |
| C1orf200  | 0.084778004  | 0.107815058 | 0.156897106 |
| STRADB    | -0.084774438 | 0.107829922 | 0.156907271 |
| ALB       | -0.084737055 | 0.107985866 | 0.157122709 |
| KCNJ8     | -0.084730148 | 0.108014698 | 0.157153179 |
| PNOC      | 0.08469417   | 0.108164982 | 0.157360334 |
| C16orf7   | 0.084655733  | 0.108325718 | 0.157582664 |
| MAPT      | 0.0846499    | 0.108350128 | 0.157606662 |
| CSN1S2A   | 0.084645054  | 0.108370411 | 0.157624652 |
| KRTAP10-5 | -0.084607308 | 0.10852849  | 0.15784305  |
| C11orf24  | 0.084581495  | 0.108636701 | 0.157980931 |
| SLAMF9    | 0.084580909  | 0.108639159 | 0.157980931 |
| CLCNKB    | 0.084569247  | 0.108688076 | 0.158040525 |
| HIST1H2BF | -0.084562959 | 0.108714458 | 0.158067345 |
| SLC1A6    | 0.084539786  | 0.108811729 | 0.158197225 |
| SNORD22   | 0.084528807  | 0.108857839 | 0.158252709 |
| LPGAT1    | -0.084525835 | 0.108870322 | 0.158256543 |
| TEX13B    | 0.084524395  | 0.10887637  | 0.158256543 |
| SLC10A5   | 0.084519164  | 0.108898349 | 0.158276939 |
| FAM171A2  | -0.084501807 | 0.108971297 | 0.158371407 |
| PLEK      | -0.084488561 | 0.109026994 | 0.15844079  |
| L1CAM     | -0.084475394 | 0.10908238  | 0.158509711 |
| FSTL4     | 0.084470176  | 0.109104335 | 0.158530048 |

|          |              |             |             |
|----------|--------------|-------------|-------------|
| CYP3A7   | -0.08445447  | 0.10917044  | 0.158614526 |
| MUL1     | -0.084388994 | 0.109446366 | 0.159003821 |
| BARX2    | -0.084383733 | 0.109468558 | 0.159014546 |
| SLC27A3  | 0.084383458  | 0.109469718 | 0.159014546 |
| HDLBP    | 0.084374599  | 0.109507101 | 0.159057248 |
| CIT      | 0.084368188  | 0.109534157 | 0.159081678 |
| C4orf37  | -0.084366828 | 0.109539897 | 0.159081678 |
| RAD21L1  | -0.084291758 | 0.109857142 | 0.15953077  |
| GMPS     | 0.084281619  | 0.109900043 | 0.159581433 |
| EHBP1L1  | -0.084276362 | 0.109922292 | 0.159602104 |
| SNORA26  | 0.0842549    | 0.110013169 | 0.159722407 |
| MKNK1    | -0.084246855 | 0.110047246 | 0.159760235 |
| CYTL1    | -0.084215114 | 0.110181784 | 0.159921593 |
| P4HA2    | 0.084215063  | 0.110181999 | 0.159921593 |
| DUSP2    | 0.084214949  | 0.110182484 | 0.159921593 |
| SCCPDH   | 0.084210441  | 0.1102016   | 0.159937681 |
| SLC22A10 | -0.084208534 | 0.110209689 | 0.159937766 |
| VDR      | -0.084204758 | 0.110225705 | 0.159949353 |
| OPTN     | 0.084199374  | 0.110248547 | 0.159970842 |
| CSF3R    | -0.084169938 | 0.110373487 | 0.160140463 |
| SLPI     | -0.084138268 | 0.110508035 | 0.160323998 |
| SNORA63  | 0.084120607  | 0.110583123 | 0.160421248 |
| ZSCAN12  | -0.084101946 | 0.110662509 | 0.160524719 |
| LPHN1    | -0.084083549 | 0.110740809 | 0.160615715 |
| ATP5L2   | 0.084083418  | 0.11074137  | 0.160615715 |
| LRRC37A3 | 0.084032627  | 0.110957782 | 0.160917873 |
| ACSS3    | -0.084007298 | 0.111065826 | 0.161062836 |
| GPR98    | 0.084002556  | 0.111086064 | 0.161080455 |
| HAUS3    | -0.083911929 | 0.111473384 | 0.161630319 |
| SCN1B    | 0.08390606   | 0.111498506 | 0.161654976 |
| ZNF396   | -0.083858908 | 0.111700476 | 0.161936011 |
| BCAS2    | 0.083829749  | 0.111825523 | 0.162102873 |
| SAP30L   | -0.083828273 | 0.111831854 | 0.162102873 |
| SLC22A12 | 0.083780648  | 0.112036334 | 0.162387452 |
| TMEM200B | 0.083765066  | 0.112103302 | 0.162468394 |
| GALNT8   | -0.08376233  | 0.112115064 | 0.162468394 |
| MCHR2    | 0.08376196   | 0.112116652 | 0.162468394 |
| HIFOO    | 0.083737146  | 0.112223368 | 0.162611203 |
| CCDC30   | -0.083704669 | 0.112363161 | 0.162801918 |
| GPR62    | 0.083702574  | 0.112372187 | 0.16280315  |
| TUBA4A   | 0.083669407  | 0.112515098 | 0.16299834  |
| MICALL1  | -0.083615758 | 0.112746568 | 0.16331353  |
| HAR1B    | -0.083615178 | 0.11274907  | 0.16331353  |
| POU3F2   | 0.083586504  | 0.112872941 | 0.163481064 |
| PDILT    | -0.083562555 | 0.112976479 | 0.163619124 |
| NXF4     | 0.083553731  | 0.113014648 | 0.163662501 |

|           |              |             |             |
|-----------|--------------|-------------|-------------|
| ZNF197    | -0.083522977 | 0.113147754 | 0.163837255 |
| SPAG11B   | 0.083522048  | 0.113151775 | 0.163837255 |
| CILP2     | -0.083506013 | 0.113221227 | 0.163925899 |
| DPYSL5    | 0.083476974  | 0.113347084 | 0.164096189 |
| C15orf50  | -0.083444236 | 0.113489111 | 0.164289862 |
| CDC42EP4  | 0.083440964  | 0.11350331  | 0.164298475 |
| COG7      | -0.083411581 | 0.11363091  | 0.164471224 |
| KRTAP20-2 | 0.083395824  | 0.113699383 | 0.164558374 |
| MMP23B    | -0.083363225 | 0.113841148 | 0.164751579 |
| RILPL2    | 0.083326962  | 0.113999008 | 0.164968046 |
| OPA3      | 0.083319379  | 0.114032038 | 0.165003854 |
| MYL7      | -0.083307871 | 0.114082184 | 0.165064422 |
| PEG3      | -0.083303247 | 0.114102339 | 0.165081589 |
| H19       | 0.083241364  | 0.114372313 | 0.165456476 |
| CDHR2     | 0.083240046  | 0.114378072 | 0.165456476 |
| ADARB2    | -0.083230742 | 0.114418704 | 0.165503232 |
| NUDT4     | -0.083224143 | 0.114447533 | 0.165532909 |
| SRPX2     | -0.083207499 | 0.114520272 | 0.165626087 |
| CNTNAP1   | -0.083204237 | 0.114534527 | 0.165634675 |
| VSX1      | -0.083200957 | 0.114548868 | 0.165643386 |
| ENTPD2    | 0.083176271  | 0.114656838 | 0.165787478 |
| SMYD1     | -0.083173909 | 0.114667174 | 0.165790385 |
| PROZ      | -0.083153419 | 0.114756853 | 0.165908001 |
| CSN1S1    | 0.083133811  | 0.114842728 | 0.166020102 |
| ZNF230    | -0.083073987 | 0.115105041 | 0.166387231 |
| P2RY4     | -0.083071227 | 0.115117152 | 0.166392662 |
| RBM6      | 0.083030289  | 0.11529694  | 0.166640435 |
| ACP2      | 0.08302056   | 0.1153397   | 0.16669014  |
| MAPK1IP1L | -0.082998932 | 0.115434803 | 0.166815478 |
| TRIM24    | 0.082967984  | 0.115570987 | 0.167000161 |
| ESR2      | -0.082947176 | 0.115662624 | 0.167120449 |
| HNF4A     | -0.082919952 | 0.115782603 | 0.167281519 |
| KIR2DL3   | -0.082918071 | 0.115790898 | 0.167281519 |
| WNT8A     | 0.082912349  | 0.11581613  | 0.167305834 |
| RLBP1     | -0.082907547 | 0.115837307 | 0.167324288 |
| CSTA      | 0.082904906  | 0.115848956 | 0.167328979 |
| GABRA6    | 0.082902054  | 0.115861536 | 0.167335013 |
| ATG4D     | 0.082891806  | 0.115906747 | 0.167388171 |
| SLED1     | 0.082881575  | 0.115951901 | 0.167441238 |
| IL13      | -0.082870892 | 0.115999062 | 0.167497196 |
| FGF22     | 0.082859053  | 0.116051345 | 0.16756054  |
| MUC1      | 0.082847783  | 0.116101129 | 0.167620269 |
| UBA5      | -0.082834715 | 0.116158881 | 0.167691491 |
| FBXL13    | -0.082825745 | 0.116198535 | 0.167736578 |
| LOC285629 | 0.082784704  | 0.116380098 | 0.167986494 |
| FUT9      | 0.082769863  | 0.116445808 | 0.168069159 |

|          |              |             |             |
|----------|--------------|-------------|-------------|
| AQP11    | 0.082748267  | 0.116541481 | 0.168195058 |
| SLC36A3  | 0.082727019  | 0.11663567  | 0.168313268 |
| XKR9     | -0.082725977 | 0.116640292 | 0.168313268 |
| SMO      | -0.082721697 | 0.116659271 | 0.168328459 |
| HES4     | 0.0827186    | 0.116673005 | 0.168336079 |
| SPATA16  | 0.082708438  | 0.116718086 | 0.168388922 |
| PKDCC    | -0.082693357 | 0.11678501  | 0.168473269 |
| FLJ32063 | -0.082685723 | 0.116818898 | 0.168509949 |
| ACTR3B   | 0.08267148   | 0.116882149 | 0.168588977 |
| ATPBD4   | 0.082664831  | 0.116911683 | 0.168619363 |
| PPP1R10  | 0.082644289  | 0.117002967 | 0.1687388   |
| MAGEC3   | 0.082641919  | 0.117013505 | 0.168741779 |
| ESRP1    | -0.082630093 | 0.117066084 | 0.168805376 |
| PCDH10   | -0.082617996 | 0.117119891 | 0.168870738 |
| CTCFL    | -0.082582265 | 0.117278929 | 0.16908219  |
| KCNE2    | 0.082581234  | 0.117283524 | 0.16908219  |
| NT5M     | 0.082571612  | 0.117326379 | 0.169131729 |
| C8orf31  | -0.08255196  | 0.11741395  | 0.169245716 |
| ZCCHC5   | -0.082537547 | 0.117478208 | 0.169326085 |
| IFT74    | -0.082516714 | 0.117571137 | 0.169447763 |
| RNF43    | 0.082491496  | 0.117683705 | 0.169597727 |
| LRFN1    | 0.082480444  | 0.117733064 | 0.169656583 |
| TCEAL7   | -0.082476277 | 0.117751679 | 0.16967113  |
| FAM46D   | 0.08246592   | 0.117797955 | 0.16972553  |
| PSG2     | -0.082462803 | 0.117811886 | 0.169733322 |
| GNRH1    | -0.082458689 | 0.117830271 | 0.16974753  |
| OGFRL1   | -0.082438556 | 0.117920289 | 0.169864922 |
| SLC17A2  | 0.082426803  | 0.117972861 | 0.169928361 |
| LAD1     | 0.082422991  | 0.117989917 | 0.169940638 |
| SLC35F3  | -0.082365044 | 0.118249423 | 0.170302086 |
| PRRX2    | 0.082346705  | 0.11833164  | 0.170408172 |
| TAS2R19  | -0.082343867 | 0.118344372 | 0.170414184 |
| CSRP3    | -0.08233043  | 0.118404647 | 0.170488652 |
| SLC27A4  | 0.082328205  | 0.118414629 | 0.170490698 |
| TFF3     | 0.082314423  | 0.118476484 | 0.170567424 |
| PCGEM1   | 0.082302702  | 0.118529104 | 0.170630845 |
| PCYT1B   | -0.08227153  | 0.118669146 | 0.170820097 |
| CYP19A1  | 0.082257382  | 0.118732746 | 0.170899294 |
| KCNJ9    | 0.082240632  | 0.118808081 | 0.17099537  |
| PRKCZ    | -0.082236253 | 0.118827782 | 0.171011365 |
| FIGLA    | 0.082229733  | 0.118857121 | 0.171041228 |
| GNRH2    | -0.082213964 | 0.118928102 | 0.171131008 |
| CRH      | 0.082186869  | 0.119050135 | 0.17129423  |
| SLC22A3  | 0.082181235  | 0.119075526 | 0.171318385 |
| HAT1     | 0.082171061  | 0.11912138  | 0.171371977 |
| DNAJC5G  | 0.082134279  | 0.119287283 | 0.171598255 |

|           |              |             |             |
|-----------|--------------|-------------|-------------|
| C1orf61   | 0.082103318  | 0.119427067 | 0.17178693  |
| RLN2      | 0.082085908  | 0.119505728 | 0.171887663 |
| NEK10     | -0.082027927 | 0.119767987 | 0.172246041 |
| RDH10     | -0.082025729 | 0.119777938 | 0.172246041 |
| STAB1     | -0.082025088 | 0.11978084  | 0.172246041 |
| NADSYN1   | 0.082006058  | 0.11986702  | 0.172346979 |
| BANP      | 0.082004106  | 0.119875863 | 0.172346979 |
| LY86      | 0.082003856  | 0.119876995 | 0.172346979 |
| NEIL2     | -0.081945711 | 0.120140629 | 0.172713536 |
| E2F8      | 0.08192797   | 0.12022116  | 0.172816832 |
| STRA8     | 0.081897917  | 0.120357672 | 0.17300058  |
| PIGG      | -0.081851784 | 0.120567462 | 0.173289622 |
| MAFF      | -0.08183913  | 0.120625055 | 0.173359888 |
| CXCL11    | -0.081829864 | 0.120667243 | 0.173408005 |
| GPR83     | -0.081827483 | 0.120678083 | 0.17341107  |
| LOC100132 | 0.081824157  | 0.120693229 | 0.173420322 |
| RNF126P1  | 0.081803628  | 0.120786751 | 0.173542179 |
| LOC100128 | -0.081798809 | 0.120808715 | 0.173561215 |
| RTL1      | 0.081791115  | 0.120843784 | 0.173599073 |
| SFTA2     | -0.081777723 | 0.120904845 | 0.173674264 |
| MST4      | -0.081767163 | 0.120953015 | 0.173730926 |
| GNB3      | 0.081751362  | 0.121025114 | 0.173821948 |
| IL2RA     | -0.081745156 | 0.121053439 | 0.173850093 |
| SLC22A13  | -0.081723918 | 0.121150419 | 0.173976824 |
| SLC11A1   | 0.081718169  | 0.121176681 | 0.17400199  |
| RHBDD2    | 0.081709203  | 0.121217648 | 0.174036857 |
| CLEC4C    | -0.081709029 | 0.121218441 | 0.174036857 |
| PDE4A     | -0.081687788 | 0.121315537 | 0.174156569 |
| ARHGEF1   | 0.081686962  | 0.121319311 | 0.174156569 |
| ZNF28     | -0.081682707 | 0.12133877  | 0.174171947 |
| CCDC37    | 0.081643556  | 0.121517922 | 0.174416534 |
| MYO3A     | -0.081627269 | 0.121592507 | 0.174511011 |
| AMY1A     | 0.081621231  | 0.121620167 | 0.174535107 |
| LOC100133 | 0.081619778  | 0.121626825 | 0.174535107 |
| ADAM15    | -0.081605097 | 0.121694103 | 0.174616494 |
| AQP6      | 0.081603576  | 0.121701077 | 0.174616494 |
| FAM157B   | -0.081594017 | 0.1217449   | 0.174666788 |
| SPATA21   | 0.081570057  | 0.121854798 | 0.174811865 |
| GINS4     | 0.081563485  | 0.121884957 | 0.174842535 |
| LOC100129 | 0.081518934  | 0.122089544 | 0.175123399 |
| RABGAP1L  | -0.081489508 | 0.122224822 | 0.175304814 |
| ACCSL     | -0.081466164 | 0.122332223 | 0.175446221 |
| NT5C2     | -0.081447101 | 0.122419982 | 0.17555944  |
| DHODH     | -0.081434601 | 0.122477555 | 0.175629357 |
| CNOT6     | -0.081431988 | 0.122489592 | 0.175633971 |
| CAMK2N2   | 0.08142305   | 0.122530772 | 0.175680326 |

|           |              |             |             |
|-----------|--------------|-------------|-------------|
| CD276     | 0.081421143  | 0.122539564 | 0.175680326 |
| C10orf68  | -0.081416272 | 0.122562009 | 0.175699857 |
| FASTKD2   | -0.081401245 | 0.122631288 | 0.175786519 |
| C16orf81  | -0.081386571 | 0.122698962 | 0.175870868 |
| MLLT11    | -0.081361061 | 0.122816687 | 0.17602694  |
| ORM2      | 0.081284675  | 0.123169719 | 0.176520218 |
| LHFPL3    | 0.081280972  | 0.123186854 | 0.176532071 |
| FZD6      | -0.08122744  | 0.123434759 | 0.176874603 |
| IL1RAPL1  | -0.081216411 | 0.123485884 | 0.176935131 |
| C11orf66  | -0.08120953  | 0.123517787 | 0.17696811  |
| CCL26     | 0.081181352  | 0.123648503 | 0.177142647 |
| TMEM214   | 0.081169015  | 0.123705763 | 0.177211932 |
| LOC388242 | 0.081165403  | 0.123722534 | 0.177223208 |
| GLDC      | -0.081150109 | 0.123793559 | 0.177312193 |
| LOH3CR2A  | -0.081124663 | 0.123911804 | 0.177468794 |
| POR       | -0.081085847 | 0.124092339 | 0.177714579 |
| ADAMTS19  | 0.081071568  | 0.124158804 | 0.177796979 |
| F7        | -0.08106236  | 0.124201683 | 0.17784179  |
| KLK14     | -0.081061012 | 0.124207957 | 0.17784179  |
| GABPB2    | -0.081054818 | 0.124236809 | 0.177870313 |
| SLC6A9    | 0.0810485    | 0.124266242 | 0.177899662 |
| TINF2     | -0.08103878  | 0.124311529 | 0.177951704 |
| PLD6      | 0.081017813  | 0.12440927  | 0.178078819 |
| PRMT2     | 0.080989364  | 0.124541981 | 0.178255969 |
| KCNC4     | -0.080971982 | 0.12462312  | 0.178359284 |
| ILF3      | 0.080957887  | 0.124688947 | 0.178439351 |
| LOC100129 | 0.080956166  | 0.124696985 | 0.178439351 |
| C20orf30  | 0.080947557  | 0.124737207 | 0.178484083 |
| SLC1A3    | -0.080923723 | 0.12484861  | 0.178630654 |
| MGAT4C    | -0.080887934 | 0.125016041 | 0.178857361 |
| OR4A47    | -0.080881411 | 0.125046573 | 0.17888819  |
| ALOX12B   | 0.080866066  | 0.125118429 | 0.17897813  |
| MVP       | 0.080850041  | 0.125193501 | 0.179072654 |
| ABLIM3    | -0.080838209 | 0.125248951 | 0.179139102 |
| TMPRSS9   | -0.080783657 | 0.125504864 | 0.179492235 |
| CHST14    | -0.08075407  | 0.125643831 | 0.179678077 |
| RBM1J     | 0.080749977  | 0.125663063 | 0.179691551 |
| NDVIP1    | -0.080748225 | 0.125671299 | 0.179691551 |
| LOC151300 | 0.080745481  | 0.125684195 | 0.179697088 |
| KRT27     | -0.08072696  | 0.125771268 | 0.179808672 |
| NUP35     | 0.080697078  | 0.125911852 | 0.179996736 |
| CHI3L2    | 0.080683068  | 0.125977804 | 0.180078092 |
| RRAS2     | -0.080663716 | 0.126068951 | 0.180195447 |
| OR1Q1     | -0.080656465 | 0.126103114 | 0.180231341 |
| MYEF2     | 0.080654487  | 0.126112436 | 0.18023173  |
| LOC441869 | 0.080650669  | 0.126130428 | 0.180244509 |

|          |              |             |             |
|----------|--------------|-------------|-------------|
| C2orf201 | 0.080610718  | 0.126318826 | 0.180499102 |
| LUC7L3   | 0.080609046  | 0.126326713 | 0.180499102 |
| TPH2     | -0.080598541 | 0.126376293 | 0.18055699  |
| CDC7     | 0.080596586  | 0.126385518 | 0.180557217 |
| OLIG3    | 0.080591991  | 0.126407212 | 0.180575255 |
| FZD9     | 0.080576636  | 0.126479718 | 0.180665872 |
| SLC26A8  | -0.080574453 | 0.126490032 | 0.180667645 |
| LHFPL5   | 0.080555669  | 0.126578779 | 0.180781439 |
| PRAMEF6  | -0.080528716 | 0.126706208 | 0.180950457 |
| C7orf54  | 0.080522412  | 0.126736026 | 0.180979011 |
| LYZL4    | 0.080520647  | 0.126744377 | 0.180979011 |
| ATP1A3   | -0.080518007 | 0.126756863 | 0.180983864 |
| ZNF138   | -0.080511095 | 0.126789571 | 0.181017586 |
| METTL2B  | -0.080498464 | 0.126849352 | 0.181089953 |
| VSTM2L   | -0.080454044 | 0.127059761 | 0.181377331 |
| CDHR3    | 0.080434918  | 0.127150442 | 0.181493768 |
| MYO15B   | -0.08042185  | 0.127212429 | 0.181569234 |
| RAB36    | -0.080380842 | 0.127407096 | 0.181834049 |
| APOA4    | 0.080370233  | 0.127457498 | 0.181892947 |
| DISP1    | -0.080357545 | 0.127517794 | 0.181965954 |
| BTBD11   | -0.08035102  | 0.127548811 | 0.181997175 |
| IL3      | -0.080330322 | 0.12764724  | 0.182118267 |
| C13orf27 | 0.080329329  | 0.127651965 | 0.182118267 |
| EMILIN2  | 0.080318979  | 0.127701207 | 0.182175469 |
| PRKAA2   | 0.08027788   | 0.127896887 | 0.182441552 |
| KCNK6    | -0.080266265 | 0.127952233 | 0.182507429 |
| GPR109A  | -0.08023265  | 0.128112507 | 0.182722952 |
| NF2      | 0.080210483  | 0.128218283 | 0.182860721 |
| FAM26F   | 0.080200582  | 0.128265553 | 0.182913928 |
| SLC25A17 | -0.080198821 | 0.12827396  | 0.182913928 |
| BACE2    | -0.08018658  | 0.128332421 | 0.182984188 |
| TNN      | -0.080182277 | 0.128352974 | 0.183000393 |
| GLI1     | -0.080168736 | 0.128417677 | 0.183079536 |
| SMC4     | -0.080166422 | 0.128428735 | 0.183082194 |
| WDR48    | -0.080131135 | 0.128597471 | 0.183309616 |
| SLC22A18 | 0.08012405   | 0.12863137  | 0.183344814 |
| EYA1     | 0.080117216  | 0.128664075 | 0.183378305 |
| DEGS2    | -0.080107015 | 0.128712907 | 0.183434775 |
| LCE5A    | 0.080097707  | 0.128757476 | 0.183485162 |
| GRIK4    | -0.080082447 | 0.128830568 | 0.183576185 |
| CEND1    | -0.080080024 | 0.128842181 | 0.183579597 |
| WDR64    | -0.080074543 | 0.12886844  | 0.183603877 |
| LCN1     | 0.080072273  | 0.128879323 | 0.183606246 |
| LY6G5B   | 0.080062008  | 0.128928519 | 0.183663195 |
| SLC1A7   | 0.080057547  | 0.128949909 | 0.183680526 |
| DNTT     | 0.080035066  | 0.129057724 | 0.183820954 |



|           |              |             |             |
|-----------|--------------|-------------|-------------|
| KLF17     | -0.080022072 | 0.129120074 | 0.183896608 |
| C6orf57   | 0.079968456  | 0.129377595 | 0.1842502   |
| SCARNA8   | 0.079965829  | 0.129390219 | 0.184255003 |
| MAP3K15   | 0.079960512  | 0.129415779 | 0.184278224 |
| HACL1     | 0.079918267  | 0.129619012 | 0.184554416 |
| ARHGAP33  | 0.079900382  | 0.129705124 | 0.184663821 |
| CD19      | 0.079895929  | 0.129726568 | 0.18468115  |
| SCAND2    | 0.079873607  | 0.129834121 | 0.184813251 |
| IGFL3     | -0.079872819 | 0.129837921 | 0.184813251 |
| SNORA50   | 0.079842369  | 0.12998475  | 0.185009026 |
| CGB8      | -0.079834831 | 0.130021122 | 0.185047569 |
| UBE2D4    | 0.07983051   | 0.130041972 | 0.185064019 |
| C10orf67  | -0.079820321 | 0.130091149 | 0.185120774 |
| OR1E2     | 0.079797875  | 0.130199532 | 0.185261767 |
| UGT2A1    | 0.079793246  | 0.130221897 | 0.185280351 |
| LOC158572 | -0.079786168 | 0.130256093 | 0.185315766 |
| DCP2      | 0.079782944  | 0.130271669 | 0.185324687 |
| MORN4     | 0.079778449  | 0.130293393 | 0.185342352 |
| TULP1     | 0.079773233  | 0.130318605 | 0.185364976 |
| C17orf72  | -0.079717857 | 0.130586484 | 0.185732741 |
| SRC       | 0.079708364  | 0.130632451 | 0.18578485  |
| DPP10     | -0.079678459 | 0.130777336 | 0.185977625 |
| OR2A25    | -0.07967314  | 0.130803118 | 0.186001006 |
| GSTT1     | -0.079671061 | 0.130813195 | 0.186002055 |
| UNC119    | 0.079644017  | 0.13094435  | 0.18617525  |
| C16orf3   | -0.079610596 | 0.131106577 | 0.186392596 |
| CCT8L2    | 0.079594522  | 0.131184652 | 0.186490281 |
| DNASE2B   | -0.079587424 | 0.13121914  | 0.186525994 |
| CSDAP1    | -0.079552106 | 0.131390856 | 0.186756756 |
| C2orf47   | 0.079548527  | 0.131408267 | 0.186768173 |
| FSIP1     | -0.079531625 | 0.131490512 | 0.186871729 |
| LAMB4     | -0.079522639 | 0.131534252 | 0.186920553 |
| HRASLS5   | -0.079502621 | 0.131631738 | 0.187045742 |
| LPAR2     | 0.079497359  | 0.131657373 | 0.18706882  |
| DEK       | 0.079454655  | 0.131865553 | 0.187351251 |
| DMC1      | 0.079422866  | 0.13202069  | 0.187558285 |
| SDK2      | -0.079364995 | 0.132303469 | 0.187946614 |
| ECHS1     | 0.079362188  | 0.132317199 | 0.187952712 |
| C9orf122  | -0.079354841 | 0.132353136 | 0.18799035  |
| PLXDC1    | -0.079352021 | 0.132366933 | 0.187996539 |
| PTPRH     | 0.07930594   | 0.132592517 | 0.188303499 |
| FAM27L    | 0.079289828  | 0.132671463 | 0.188402181 |
| TMEM138   | 0.079286908  | 0.132685774 | 0.188409069 |
| KRT5      | -0.079271601 | 0.132760817 | 0.188502187 |
| AGTR2     | 0.079265933  | 0.13278861  | 0.188528208 |
| DHR SX    | 0.079246436  | 0.132884254 | 0.18865055  |

|           |              |             |             |
|-----------|--------------|-------------|-------------|
| PODXL2    | 0.079242728  | 0.132902451 | 0.188662934 |
| ACOT6     | 0.079215651  | 0.133035386 | 0.188838183 |
| GPR63     | -0.079198452 | 0.133119871 | 0.18894464  |
| LOC100302 | 0.079183077  | 0.133195437 | 0.189038422 |
| KCNQ1DN   | -0.07917334  | 0.133243311 | 0.189092891 |
| TMEM84    | 0.079169877  | 0.133260341 | 0.189103583 |
| C3        | -0.079135491 | 0.13342952  | 0.189330167 |
| FBXL2     | -0.079101035 | 0.133599212 | 0.189557446 |
| CD81      | -0.079082441 | 0.133690855 | 0.18967396  |
| NAE1      | 0.07907492   | 0.133727939 | 0.189713058 |
| GABBR2    | -0.07904067  | 0.133896907 | 0.189939233 |
| FLJ26850  | 0.079033262  | 0.133933474 | 0.189977574 |
| TDRD6     | -0.079026588 | 0.133966427 | 0.190010782 |
| CCDC57    | 0.079015027  | 0.134023523 | 0.190078227 |
| APLP1     | -0.079009559 | 0.13405053  | 0.190102992 |
| FAM78A    | -0.078986289 | 0.134165527 | 0.190252525 |
| TPPP2     | -0.078963069 | 0.134280351 | 0.190375317 |
| C15orf17  | 0.078961875  | 0.134286256 | 0.190375317 |
| FCRLB     | -0.078961077 | 0.134290205 | 0.190375317 |
| RAET1E    | -0.078961046 | 0.134290357 | 0.190375317 |
| MGC15885  | -0.078933665 | 0.134425863 | 0.190553852 |
| HSPA7     | -0.078906842 | 0.134558706 | 0.190726329 |
| HOXC5     | 0.078905231  | 0.134566691 | 0.190726329 |
| NCRNA0018 | 0.078898834  | 0.134598389 | 0.19075768  |
| GLRB      | -0.078890765 | 0.134638379 | 0.190791468 |
| ITM2B     | -0.078890158 | 0.13464139  | 0.190791468 |
| OS9       | 0.078882     | 0.134681834 | 0.190835198 |
| ACTG1     | 0.078878499  | 0.134699189 | 0.190846211 |
| C10orf93  | -0.078870015 | 0.134741266 | 0.190892246 |
| ZNF614    | -0.078861516 | 0.134783424 | 0.190938391 |
| SYT16     | -0.078844969 | 0.13486553  | 0.191041114 |
| GABRR1    | 0.078792916  | 0.135124072 | 0.191393733 |
| RBM39     | -0.078775963 | 0.135208359 | 0.191499499 |
| PPAPDC1B  | -0.078769902 | 0.135238502 | 0.191528571 |
| BRSK1     | 0.07875724   | 0.135301492 | 0.191604154 |
| GAD2      | 0.078739024  | 0.135392152 | 0.191718907 |
| PADI4     | -0.078695479 | 0.135609055 | 0.192012395 |
| PTPRVP    | -0.078689643 | 0.13563815  | 0.192039937 |
| SDC1      | -0.078684884 | 0.135661873 | 0.192059871 |
| LOC286238 | -0.078641573 | 0.135877947 | 0.192352098 |
| NCRNA0011 | -0.078594536 | 0.136112906 | 0.192671016 |
| PPP3R2    | -0.078584285 | 0.13616415  | 0.192729855 |
| DNAJB7    | -0.078569835 | 0.136236416 | 0.192818437 |
| WARS2     | 0.078535262  | 0.136409433 | 0.193049592 |
| SCAMP4    | 0.078506447  | 0.136553766 | 0.193240123 |
| LOC145474 | 0.078485001  | 0.136661263 | 0.193378503 |

|           |              |             |             |
|-----------|--------------|-------------|-------------|
| FLJ30679  | -0.078473687 | 0.136718    | 0.193445042 |
| RAB35     | -0.078470758 | 0.136732691 | 0.193452084 |
| BTF3L1    | 0.078450778  | 0.136832942 | 0.193580168 |
| TAF1C     | -0.078365169 | 0.137263117 | 0.194174952 |
| F2        | 0.078361851  | 0.137279811 | 0.194184774 |
| C9orf53   | 0.078346728  | 0.137355915 | 0.194278626 |
| PILRB     | -0.078315426 | 0.137513545 | 0.194487767 |
| ZNF177    | -0.07830236  | 0.137579383 | 0.194566195 |
| PTPLA     | -0.078300544 | 0.137588537 | 0.194566195 |
| CCDC53    | 0.078293428  | 0.137624402 | 0.194603094 |
| DPYS      | -0.078286588 | 0.13765889  | 0.194638039 |
| LOC91149  | 0.078278426  | 0.137700046 | 0.19468241  |
| KRT71     | -0.078250468 | 0.137841101 | 0.194868    |
| C5orf40   | -0.078232662 | 0.137930993 | 0.194981242 |
| FNDC7     | 0.078196467  | 0.138113862 | 0.19522589  |
| IL31RA    | 0.078171313  | 0.138241055 | 0.19539181  |
| IFITM2    | 0.07816847   | 0.138255437 | 0.19539827  |
| RIOK2     | 0.07815573   | 0.1383199   | 0.195475504 |
| ZNF3      | 0.078124089  | 0.138480096 | 0.195688008 |
| PXMP2     | 0.07809226   | 0.138641383 | 0.195902026 |
| RBM38     | 0.07808298   | 0.13868844  | 0.195954613 |
| IL3RA     | 0.078025527  | 0.138980017 | 0.196352657 |
| MEIS3     | -0.078021872 | 0.13899858  | 0.196364951 |
| CCDC152   | 0.07801825   | 0.139016982 | 0.196377018 |
| MTMR11    | 0.07800242   | 0.139097417 | 0.196476704 |
| SPP2      | -0.077997291 | 0.139123491 | 0.196499598 |
| TMEM106A  | -0.077986422 | 0.139178747 | 0.196558896 |
| RERGL     | -0.07798515  | 0.139185215 | 0.196558896 |
| PTPN7     | 0.077982426  | 0.139199068 | 0.196564522 |
| ARHGAP36  | -0.077972248 | 0.139250834 | 0.196623678 |
| SCARNA3   | 0.077961965  | 0.139303145 | 0.196683597 |
| ARGFX     | 0.077937081  | 0.139429806 | 0.196848475 |
| FAM120AO  | 0.077930143  | 0.139465138 | 0.1968844   |
| PMCH      | 0.077918415  | 0.139524871 | 0.196954764 |
| TH        | 0.077865756  | 0.139793338 | 0.197319748 |
| GPN3      | 0.077831767  | 0.139966828 | 0.19755063  |
| USP39     | 0.077811757  | 0.140069048 | 0.197680893 |
| TRIM49    | 0.077796257  | 0.140148262 | 0.197778673 |
| FBXO27    | -0.077783746 | 0.14021223  | 0.197850462 |
| LMCD1     | 0.077782354  | 0.140219349 | 0.197850462 |
| GNAI2     | -0.077780479 | 0.140228936 | 0.197850462 |
| PRDM11    | -0.077766001 | 0.140302991 | 0.197940923 |
| MAP3K4    | -0.077759734 | 0.14033506  | 0.197972142 |
| ZNF682    | 0.077755535  | 0.140356548 | 0.19798843  |
| LOC100132 | -0.077747651 | 0.140396898 | 0.198031321 |
| TRPM3     | -0.07774178  | 0.140426955 | 0.19805969  |

|           |              |             |             |
|-----------|--------------|-------------|-------------|
| RGS12     | 0.077734725  | 0.140463078 | 0.198096607 |
| CASQ1     | -0.077730162 | 0.140486444 | 0.198115531 |
| SERPINI2  | 0.077685685  | 0.140714362 | 0.198422894 |
| BTBD17    | 0.077681304  | 0.140736828 | 0.198440522 |
| GUCY2C    | 0.077676579  | 0.140761066 | 0.198460646 |
| BEST3     | -0.077641091 | 0.140943172 | 0.198703332 |
| LCTL      | -0.077639057 | 0.140953615 | 0.198703988 |
| CASP1     | -0.077633743 | 0.140980897 | 0.198728381 |
| CTSE      | -0.077624554 | 0.14102809  | 0.19877775  |
| GPR137C   | -0.077623037 | 0.141035883 | 0.19877775  |
| AG2       | -0.077620979 | 0.141046455 | 0.198778583 |
| PHKA2     | 0.077614593  | 0.141079261 | 0.198810748 |
| SLC5A9    | 0.077612279  | 0.141091152 | 0.198813436 |
| ZSCAN5A   | 0.07758432   | 0.141234868 | 0.199001867 |
| NOSTRIN   | -0.077557176 | 0.1413745   | 0.199184518 |
| LEFTY2    | 0.077552826  | 0.141396885 | 0.199197859 |
| C6orf167  | -0.077551449 | 0.141403974 | 0.199197859 |
| LOC441666 | 0.07753625   | 0.141482215 | 0.199293982 |
| SIM2      | -0.077511207 | 0.141611209 | 0.199461576 |
| PPP2R3A   | -0.077468598 | 0.141830891 | 0.199756873 |
| FCRL5     | -0.077464736 | 0.141850815 | 0.199770807 |
| ANP32E    | 0.077455526  | 0.141898339 | 0.199823605 |
| NPFFR1    | -0.077427202 | 0.142044566 | 0.200001256 |
| FAM175A   | 0.0774272    | 0.142044578 | 0.200001256 |
| ARMC5     | 0.07742223   | 0.142070246 | 0.200023256 |
| IL1F9     | -0.077416109 | 0.142101868 | 0.200053634 |
| ELMO1     | -0.077410762 | 0.142129492 | 0.20007838  |
| KRTAP5-11 | 0.077408345  | 0.14214198  | 0.200081816 |
| CPLX4     | 0.077399309  | 0.142188682 | 0.200133409 |
| NRG1      | -0.07739343  | 0.142219071 | 0.200162036 |
| KRTAP4-1  | 0.077387848  | 0.142247931 | 0.200188505 |
| PKM2      | 0.077384655  | 0.142264438 | 0.200197589 |
| SLC6A19   | 0.07738159   | 0.142280286 | 0.200205744 |
| PRSSL1    | 0.077358945  | 0.142397427 | 0.20035642  |
| ATAD2     | 0.077356513  | 0.142410013 | 0.200359972 |
| OR9A2     | -0.077338827 | 0.142501559 | 0.200474608 |
| CMKLR1    | -0.077331555 | 0.142539211 | 0.200513412 |
| USP13     | -0.077313445 | 0.142633017 | 0.2006312   |
| SESN2     | -0.077262401 | 0.142897666 | 0.200985238 |
| NR1I3     | 0.077259773  | 0.142911302 | 0.200985238 |
| PGLYRP1   | -0.077259063 | 0.142914986 | 0.200985238 |
| PATL2     | -0.077255857 | 0.142931626 | 0.200994445 |
| TRIM13    | -0.077248835 | 0.142968069 | 0.201031497 |
| HFM1      | 0.077227401  | 0.143079351 | 0.201172909 |
| PABPC1L2B | 0.077225574  | 0.14308884  | 0.201172909 |
| MPL       | -0.077218513 | 0.143125518 | 0.201210271 |

|           |              |             |             |
|-----------|--------------|-------------|-------------|
| TRPV4     | -0.077211786 | 0.143160463 | 0.20124519  |
| MIPOL1    | -0.077199172 | 0.143226016 | 0.201323131 |
| NRADDP    | 0.077185182  | 0.143298741 | 0.201411139 |
| SDR16C5   | -0.077182535 | 0.143312503 | 0.201416267 |
| FAM71F1   | 0.077174079  | 0.14335648  | 0.201463856 |
| PRAMEF9   | -0.077166626 | 0.143395249 | 0.20149034  |
| LOC389033 | -0.077166566 | 0.143395561 | 0.20149034  |
| MS4A6A    | -0.077162783 | 0.143415243 | 0.201503779 |
| CHD4      | -0.077101003 | 0.143736943 | 0.201941533 |
| LOC157381 | -0.07709557  | 0.143765261 | 0.201967069 |
| DNAJA2    | -0.077089078 | 0.143799104 | 0.202000364 |
| ITPRIPL1  | -0.077081793 | 0.143837088 | 0.202017419 |
| IL1B      | -0.077080984 | 0.143841305 | 0.202017419 |
| ACMSD     | -0.077080913 | 0.143841677 | 0.202017419 |
| MOBK12C   | -0.077045471 | 0.14402658  | 0.20226284  |
| LOC100190 | -0.077042685 | 0.144041126 | 0.202269005 |
| SLC5A7    | -0.077019786 | 0.144160696 | 0.202410303 |
| C10orf71  | -0.077019522 | 0.144162075 | 0.202410303 |
| SLC2A9    | -0.077001979 | 0.144253732 | 0.202524714 |
| TMEM130   | -0.076988557 | 0.144323888 | 0.202608927 |
| PLEC      | -0.076986528 | 0.144334495 | 0.202609534 |
| C12orf29  | -0.076980235 | 0.144367403 | 0.202635592 |
| ZNF607    | 0.076979086  | 0.144373408 | 0.202635592 |
| LOC100130 | 0.076946994  | 0.144541305 | 0.202856947 |
| SCGB1A1   | 0.076939495  | 0.144580555 | 0.202897735 |
| MDS2      | 0.076887499  | 0.144852949 | 0.203265676 |
| TTC7A     | -0.076881279 | 0.144885561 | 0.203297115 |
| L3MBTL    | 0.076848792  | 0.145055984 | 0.203521905 |
| CCNI2     | 0.076828418  | 0.14516294  | 0.203657622 |
| RRAGA     | -0.076808466 | 0.145267737 | 0.203790291 |
| CD47      | -0.076787946 | 0.145375581 | 0.203927217 |
| LOC100101 | -0.07676833  | 0.145478728 | 0.204057534 |
| ETFA      | -0.076686571 | 0.145909247 | 0.204646993 |
| ZNF287    | -0.076676032 | 0.145964814 | 0.204710512 |
| IL2       | -0.076659984 | 0.146049459 | 0.204814799 |
| SPATC1    | -0.076652751 | 0.146087617 | 0.204853886 |
| ZNF474    | -0.076617928 | 0.146271454 | 0.205097234 |
| EML4      | -0.07657049  | 0.146522168 | 0.205434313 |
| PSG4      | -0.076555629 | 0.146600776 | 0.205530056 |
| PSG6      | -0.076549447 | 0.146633485 | 0.205561443 |
| C6orf222  | 0.076546614  | 0.146648478 | 0.20556799  |
| C1orf230  | 0.076542853  | 0.146668381 | 0.20558142  |
| DDX11L2   | 0.076530063  | 0.146736088 | 0.205661847 |
| SLC25A35  | 0.076507143  | 0.146857472 | 0.205817491 |
| REM1      | -0.076497759 | 0.146907192 | 0.205872685 |
| DCAF4L1   | -0.076461449 | 0.1470997   | 0.206127957 |

|           |              |             |             |
|-----------|--------------|-------------|-------------|
| KRT77     | -0.076435865 | 0.147235457 | 0.206303674 |
| ATP13A5   | -0.076411343 | 0.147365666 | 0.206471594 |
| SCO1      | -0.076406509 | 0.147391342 | 0.206493041 |
| TMEM229A  | -0.076373061 | 0.147569112 | 0.206726495 |
| HNRNPA2B  | 0.076371251  | 0.147578739 | 0.206726495 |
| DCAF4     | 0.076356602  | 0.147656651 | 0.206821086 |
| MCEE      | -0.076340969 | 0.147739829 | 0.206923039 |
| FAM92B    | 0.076329366  | 0.147801592 | 0.206994987 |
| KIAA0748  | -0.076291285 | 0.148004429 | 0.207264483 |
| INS       | 0.076274988  | 0.148091299 | 0.207371553 |
| PLXNA1    | -0.076270175 | 0.148116962 | 0.207392905 |
| ACY1      | 0.076257378  | 0.148185207 | 0.207473875 |
| TNF       | -0.076228344 | 0.148340145 | 0.20767082  |
| C8orf86   | -0.076227111 | 0.148346728 | 0.20767082  |
| CDH26     | -0.076195478 | 0.148515673 | 0.207892713 |
| GZMA      | 0.076188423  | 0.148553376 | 0.207929453 |
| ITIH4     | -0.076186659 | 0.148562801 | 0.207929453 |
| CASP12    | -0.076177059 | 0.148614115 | 0.207983284 |
| TMC5      | 0.076175556  | 0.14862215  | 0.207983284 |
| MGC34034  | 0.07616085   | 0.148700788 | 0.20807871  |
| ARL4D     | 0.076158676  | 0.148712415 | 0.208080358 |
| RNASE12   | -0.076120736 | 0.148915445 | 0.208349802 |
| C2CD4B    | -0.076102979 | 0.14901054  | 0.208468206 |
| DAB2      | -0.076094968 | 0.149053461 | 0.208513605 |
| C1orf163  | -0.076076999 | 0.149149761 | 0.208633665 |
| ACOT4     | 0.076064667  | 0.149215875 | 0.208711487 |
| RAVER1    | 0.076059235  | 0.149245006 | 0.208737573 |
| THBS3     | -0.076052981 | 0.149278553 | 0.208769831 |
| ZAR1L     | 0.076046085  | 0.149315546 | 0.208806903 |
| TNFRSF14  | 0.076015466  | 0.149479888 | 0.209022045 |
| LOC646498 | 0.075998378  | 0.149571663 | 0.209135693 |
| LPPR2     | -0.07596132  | 0.149770845 | 0.209399493 |
| SPATA5L1  | 0.075935931  | 0.14990742  | 0.20957573  |
| ZNF556    | 0.07592932   | 0.149942996 | 0.209610751 |
| B3GALNT1  | -0.075926888 | 0.149956086 | 0.209614336 |
| PACRG     | -0.07588069  | 0.150204909 | 0.209947414 |
| OR4A16    | 0.075874871  | 0.150236268 | 0.209963325 |
| KIAA1755  | -0.075874666 | 0.150237378 | 0.209963325 |
| CSMD1     | 0.075858019  | 0.150327127 | 0.210074011 |
| CNGA2     | -0.075832517 | 0.150464699 | 0.210251507 |
| HES2      | -0.075821855 | 0.150522244 | 0.21031716  |
| SGSM2     | -0.075799461 | 0.150643162 | 0.210471346 |
| KCNA4     | 0.075780329  | 0.150746525 | 0.21058321  |
| PCID2     | 0.075779123  | 0.150753046 | 0.21058321  |
| DSC2      | 0.07577877   | 0.15075495  | 0.21058321  |
| ANKRD49   | -0.075772506 | 0.150788808 | 0.210615732 |

|           |              |             |             |
|-----------|--------------|-------------|-------------|
| CRYBB1    | 0.07575745   | 0.150870207 | 0.210714648 |
| HTR2C     | 0.075743881  | 0.150943591 | 0.210802358 |
| PAGE3     | 0.07572584   | 0.151041209 | 0.210923895 |
| SH2B1     | -0.075722677 | 0.151058325 | 0.210933006 |
| AMTN      | 0.075714375  | 0.151103264 | 0.210980965 |
| LYL1      | 0.075710274  | 0.151125469 | 0.210996912 |
| DPM1      | 0.075708352  | 0.151135875 | 0.210996912 |
| FGF16     | -0.075703613 | 0.151161539 | 0.211017949 |
| C16orf90  | 0.075700148  | 0.151180303 | 0.21102935  |
| GFRA3     | 0.07568484   | 0.151263229 | 0.211130306 |
| SERPINB7  | -0.075681637 | 0.151280583 | 0.211139731 |
| FLJ43950  | -0.07565385  | 0.151431206 | 0.211335141 |
| HRG       | -0.075639342 | 0.151509894 | 0.211430141 |
| COL20A1   | 0.075603346  | 0.15170526  | 0.211687938 |
| GRIK3     | -0.075591687 | 0.15176858  | 0.211761457 |
| OSBPL2    | -0.075579671 | 0.151833861 | 0.2118377   |
| ELL2      | -0.075575914 | 0.151854277 | 0.211839123 |
| FLJ10038  | 0.075575064  | 0.151858894 | 0.211839123 |
| KLRC2     | 0.075573598  | 0.151866864 | 0.211839123 |
| MAFG      | 0.075571654  | 0.151877429 | 0.211839123 |
| TMEM88B   | 0.075541542  | 0.152041145 | 0.212052622 |
| PTGDS     | -0.075533251 | 0.152086251 | 0.212100679 |
| IFNA21    | 0.075529206  | 0.152108258 | 0.212116516 |
| MIDN      | -0.075509069 | 0.152217856 | 0.212254489 |
| INPP5J    | 0.075477149  | 0.152391705 | 0.212482027 |
| VAX1      | 0.075473422  | 0.15241201  | 0.212495461 |
| DOT1L     | -0.075463354 | 0.152466883 | 0.212557086 |
| EML2      | -0.075436821 | 0.152611561 | 0.212743892 |
| TMEM14E   | -0.075415676 | 0.152726933 | 0.212889821 |
| BAIAP2L2  | 0.075410875  | 0.15275314  | 0.212911449 |
| SCN5A     | -0.075398557 | 0.152820387 | 0.212990273 |
| RFX4      | 0.075386059  | 0.152888645 | 0.213070494 |
| TRDMT1    | -0.075382262 | 0.152909385 | 0.213084487 |
| PVRL4     | -0.075353716 | 0.153065386 | 0.213286955 |
| CDC5L     | 0.075342974  | 0.153124122 | 0.213353871 |
| B3GNT4    | 0.075340779  | 0.153136122 | 0.213355664 |
| TMEM150B  | 0.075293576  | 0.15339444  | 0.213700613 |
| OR2T10    | 0.075274424  | 0.15349934  | 0.213831796 |
| OR2AG1    | -0.075269231 | 0.153527792 | 0.21384219  |
| UCHL1     | 0.075269142  | 0.153528277 | 0.21384219  |
| LOC100130 | -0.075262418 | 0.153565125 | 0.213878556 |
| PAQR7     | 0.075259485  | 0.153581204 | 0.213885991 |
| TRIM41    | -0.075255243 | 0.153604453 | 0.213903412 |
| LOC389493 | 0.075243869  | 0.153666813 | 0.213975288 |
| OVCH1     | -0.075239641 | 0.153689995 | 0.213986601 |
| C14orf68  | -0.075238468 | 0.153696427 | 0.213986601 |

|           |              |             |             |
|-----------|--------------|-------------|-------------|
| PTCHD1    | -0.075226795 | 0.153760453 | 0.214060778 |
| DYNLRB2   | 0.075223056  | 0.153780968 | 0.214074372 |
| KCNK3     | -0.075218522 | 0.153805839 | 0.21409403  |
| BRCA1     | 0.075208238  | 0.15386228  | 0.214157626 |
| RPL13AP17 | -0.075185703 | 0.153986001 | 0.214314851 |
| OR7E156P  | 0.075160423  | 0.154124879 | 0.21449315  |
| C10orf96  | 0.075154772  | 0.154155941 | 0.214521387 |
| IL5       | 0.075141176  | 0.154230681 | 0.214610398 |
| C1orf170  | 0.075134831  | 0.154265575 | 0.214643956 |
| CYP2C18   | -0.075125405 | 0.15431742  | 0.214701091 |
| FGF21     | -0.075110211 | 0.154401015 | 0.21480239  |
| NCRNA0002 | -0.075096011 | 0.154479176 | 0.214896116 |
| GGTA1     | 0.075091946  | 0.154501556 | 0.214912236 |
| C21orf81  | 0.075086491  | 0.154531589 | 0.214939    |
| RNF214    | -0.075071727 | 0.154612904 | 0.215037083 |
| OLFML3    | -0.075067433 | 0.154636564 | 0.21505497  |
| DPY19L2P1 | 0.075056068  | 0.154699187 | 0.215127038 |
| ADAM22    | -0.075047042 | 0.154748933 | 0.215181189 |
| TREM1     | 0.075035663  | 0.154811674 | 0.215253402 |
| TECTB     | -0.075014647 | 0.154927591 | 0.215381047 |
| LY6G6E    | 0.075013835  | 0.154932068 | 0.215381047 |
| GPD2      | -0.075013137 | 0.154935922 | 0.215381047 |
| PSPC1     | 0.074961257  | 0.155222365 | 0.215764179 |
| GUCY2F    | -0.074956194 | 0.155250341 | 0.215788006 |
| KIAA0174  | 0.074934565  | 0.155369899 | 0.215939112 |
| LCE3E     | -0.074923787 | 0.155429503 | 0.216006878 |
| OR4C6     | 0.074881958  | 0.155660977 | 0.216313471 |
| SRI       | 0.074872182  | 0.155715115 | 0.216373606 |
| OR2L13    | -0.074845732 | 0.155861661 | 0.216562128 |
| FAM136B   | 0.074809047  | 0.156065081 | 0.216829642 |
| CYLC2     | 0.074787334  | 0.156185577 | 0.216981916 |
| PLAG1     | 0.074771269  | 0.156274776 | 0.217090692 |
| MS4A15    | 0.074754768  | 0.156366435 | 0.21720287  |
| MRPL32    | 0.074737349  | 0.156463233 | 0.217322171 |
| SOD3      | -0.074721959 | 0.156548798 | 0.217425853 |
| SNORA47   | 0.074691683  | 0.15671723  | 0.217644604 |
| IL34      | -0.0746853   | 0.156752753 | 0.217678758 |
| TAGLN     | -0.074681948 | 0.156771411 | 0.217689489 |
| CARD14    | 0.074676873  | 0.156799669 | 0.2177036   |
| PSCA      | 0.074674906  | 0.156810616 | 0.2177036   |
| SLC23A3   | -0.074674232 | 0.156814368 | 0.2177036   |
| SLC6A4    | 0.07467154   | 0.156829363 | 0.21770924  |
| CSH2      | 0.074668562  | 0.156845945 | 0.217717083 |
| CBFA2T2   | -0.074659743 | 0.156895063 | 0.217756767 |
| KPNB1     | -0.074659502 | 0.156896402 | 0.217756767 |
| BTD       | -0.07465689  | 0.156910951 | 0.217761784 |



|           |              |             |             |
|-----------|--------------|-------------|-------------|
| GPT2      | -0.074653697 | 0.156928739 | 0.217771294 |
| GJB1      | 0.074641413  | 0.156997187 | 0.2178511   |
| UNC5CL    | 0.074624457  | 0.157091702 | 0.217967063 |
| C18orf34  | -0.074536372 | 0.157583387 | 0.21863405  |
| FAM109B   | -0.074484664 | 0.157872561 | 0.219019997 |
| SLC17A1   | 0.074470722  | 0.1579506   | 0.219111469 |
| RBMY1A3P  | 0.074468954  | 0.1579605   | 0.219111469 |
| TLX3      | 0.074440442  | 0.158120186 | 0.219317698 |
| TTL12     | 0.074431657  | 0.158169413 | 0.219370699 |
| SDCBP     | -0.074396575 | 0.158366115 | 0.219628216 |
| LOC158376 | -0.074378332 | 0.158468474 | 0.219754868 |
| STK11     | 0.074355643  | 0.158595846 | 0.219916187 |
| PRB2      | 0.074350219  | 0.158626306 | 0.21994311  |
| TAS2R42   | -0.074327234 | 0.158755443 | 0.22010684  |
| SCGB2A1   | 0.074321326  | 0.158788646 | 0.22012861  |
| RHBDL2    | -0.074320507 | 0.158793252 | 0.22012861  |
| BCKDHA    | -0.074317684 | 0.158809119 | 0.220135283 |
| ARAF      | 0.074315315  | 0.158822435 | 0.220138419 |
| LOC100128 | 0.074304188  | 0.158884996 | 0.22020045  |
| KIAA0368  | -0.074303422 | 0.158889303 | 0.22020045  |
| NCRNA0015 | 0.07429469   | 0.158938414 | 0.220253184 |
| LOC144742 | -0.074213399 | 0.159396151 | 0.220866569 |
| C2orf43   | -0.074212145 | 0.159403223 | 0.220866569 |
| EIF4B     | 0.074205159  | 0.159442609 | 0.220905772 |
| OR3A3     | 0.07418631   | 0.159548905 | 0.221023435 |
| HSFY2     | -0.074186164 | 0.159549731 | 0.221023435 |
| HAPLN1    | 0.074163827  | 0.159675772 | 0.221180998 |
| FAM119B   | -0.074162071 | 0.159685684 | 0.221180998 |
| ECSCR     | 0.074079744  | 0.160150902 | 0.221809946 |
| SERPINE3  | -0.074034301 | 0.16040813  | 0.222150759 |
| C9orf98   | 0.07402313   | 0.160471412 | 0.222222944 |
| SBK1      | -0.074005185 | 0.160573104 | 0.222348308 |
| MAP4K4    | -0.073970945 | 0.160767272 | 0.222601699 |
| SNORA52   | 0.073953494  | 0.160866306 | 0.222723338 |
| FN3K      | 0.073932713  | 0.160984293 | 0.222871199 |
| SPATS2L   | 0.073899503  | 0.161172979 | 0.223098601 |
| OR8G2     | 0.073898212  | 0.161180319 | 0.223098601 |
| C6orf132  | -0.073897888 | 0.161182158 | 0.223098601 |
| FDFT1     | 0.073883124  | 0.161266099 | 0.223199274 |
| DOLPP1    | 0.073858789  | 0.161404531 | 0.223375346 |
| KHDC1L    | 0.073845379  | 0.161480849 | 0.223465437 |
| RBM11     | -0.073842198 | 0.161498959 | 0.22347497  |
| CD5L      | -0.073838856 | 0.161517989 | 0.223485774 |
| RHEB      | 0.073834411  | 0.161543294 | 0.22350526  |
| BST1      | -0.073830287 | 0.161566778 | 0.223522222 |
| PPIL6     | 0.073824979  | 0.161597005 | 0.223548511 |

|           |              |             |             |
|-----------|--------------|-------------|-------------|
| FLJ41941  | 0.073803503  | 0.161719359 | 0.223702232 |
| KRT33B    | -0.073768331 | 0.161919882 | 0.223964054 |
| ADRA2C    | 0.073745232  | 0.162051678 | 0.224130785 |
| NKIRAS1   | -0.073739563 | 0.162084038 | 0.224159973 |
| DDX10     | 0.073707641  | 0.162266337 | 0.224396507 |
| ZNF257    | 0.073702552  | 0.162295415 | 0.224421135 |
| ROD1      | -0.073690426 | 0.162364714 | 0.224501373 |
| IER5      | -0.073680455 | 0.162421709 | 0.224564588 |
| ELMOD2    | -0.073664371 | 0.162513687 | 0.22467616  |
| C9orf123  | 0.073662257  | 0.162525778 | 0.224677278 |
| HSP90AA1  | 0.073649441  | 0.162599101 | 0.224763039 |
| LOC285370 | 0.073643685  | 0.162632035 | 0.224792961 |
| MAFA      | -0.073590862 | 0.162934546 | 0.225195466 |
| ATP2C2    | -0.073588302 | 0.162949219 | 0.225200117 |
| AP3D1     | -0.073560111 | 0.163110847 | 0.225407849 |
| PPARD     | -0.073550124 | 0.163168131 | 0.225467706 |
| ZNF285    | 0.073548613  | 0.163176804 | 0.225467706 |
| PGBD4     | -0.073536017 | 0.163249081 | 0.225551925 |
| C15orf60  | 0.073525144  | 0.163311493 | 0.225622504 |
| CSH1      | 0.073507767  | 0.163411273 | 0.225744694 |
| MMD       | 0.073499238  | 0.163460261 | 0.225796706 |
| MAEA      | -0.073495919 | 0.163479331 | 0.225807385 |
| SRCIN1    | -0.073467994 | 0.163639823 | 0.22601339  |
| FZD7      | -0.073454388 | 0.163718062 | 0.226102908 |
| EFCAB3    | 0.073452775  | 0.163727343 | 0.226102908 |
| CRTC1     | -0.07343819  | 0.163811246 | 0.22620309  |
| SEL1L2    | -0.073432203 | 0.163845701 | 0.226234981 |
| TRIM21    | -0.073425589 | 0.163883767 | 0.226258829 |
| AACSL     | 0.073425254  | 0.163885695 | 0.226258829 |
| FGF19     | -0.073414663 | 0.163946664 | 0.226327313 |
| SNORA32   | 0.073412314  | 0.163960187 | 0.226330292 |
| NAPSB     | -0.073406245 | 0.163995132 | 0.226362841 |
| GTSF1L    | 0.073393678  | 0.16406752  | 0.226447063 |
| ADH7      | -0.073372067 | 0.16419205  | 0.226603235 |
| CCDC28A   | 0.073361815  | 0.164251149 | 0.226669089 |
| SH2D7     | -0.073303131 | 0.164589752 | 0.227120629 |
| OR8D1     | 0.073294367  | 0.164640365 | 0.22717473  |
| GPR1      | -0.073275471 | 0.164749536 | 0.227309617 |
| SIGLEC15  | -0.073245301 | 0.164923944 | 0.227534489 |
| SPACA4    | -0.073241838 | 0.164943974 | 0.227546359 |
| LOC400804 | -0.073216955 | 0.165087939 | 0.227729189 |
| C1D       | 0.073198027  | 0.165197513 | 0.227864557 |
| KCNK2     | -0.07319098  | 0.165238323 | 0.227905063 |
| PIK3CD    | -0.073169328 | 0.165363755 | 0.22806227  |
| SLAMF6    | -0.073166    | 0.165383044 | 0.228073078 |
| GK2       | 0.073163328  | 0.165398526 | 0.228078635 |

|           |              |             |             |
|-----------|--------------|-------------|-------------|
| SIGLEC7   | -0.073149585 | 0.165478194 | 0.228172695 |
| TKTL1     | 0.073144513  | 0.165507602 | 0.228191625 |
| CYP2C9    | -0.073143265 | 0.165514839 | 0.228191625 |
| TF        | 0.073140783  | 0.165529228 | 0.228195665 |
| KBTBD10   | -0.073135937 | 0.165557333 | 0.228218612 |
| CEP72     | 0.073126128  | 0.165614232 | 0.228281246 |
| UGT1A10   | 0.073124149  | 0.165625716 | 0.228281274 |
| QRFP      | 0.073112267  | 0.165694662 | 0.228360498 |
| RAD51L1   | -0.07309838  | 0.165775267 | 0.228452499 |
| CXADRP2   | -0.073096814 | 0.165784359 | 0.228452499 |
| STXBP5L   | 0.073093452  | 0.16580388  | 0.22846359  |
| MXD4      | 0.073088696  | 0.165831498 | 0.228485837 |
| GAL3ST3   | 0.073083179  | 0.165863536 | 0.228514169 |
| PRSS35    | -0.073049719 | 0.166057954 | 0.228766198 |
| ARIH2     | 0.073036419  | 0.166135283 | 0.228856897 |
| LOC442459 | 0.073030398  | 0.166170295 | 0.228889295 |
| SH3BGR    | -0.072980583 | 0.16646021  | 0.229272777 |
| FBXO48    | -0.072965472 | 0.166548229 | 0.229378145 |
| FMO5      | -0.072935146 | 0.166724974 | 0.229605688 |
| AGXT      | -0.072916464 | 0.166833921 | 0.229739837 |
| CT47A9    | -0.072874602 | 0.167078255 | 0.230060391 |
| NCRNA0015 | 0.072850426  | 0.16721948  | 0.230238934 |
| UCP1      | 0.072837355  | 0.167295874 | 0.230328194 |
| GRIA1     | -0.072828358 | 0.16734847  | 0.23038468  |
| GGT1      | 0.072815073  | 0.167426155 | 0.230475694 |
| PLAC4     | -0.072802805 | 0.167497922 | 0.230558551 |
| CD97      | 0.072795021  | 0.167543471 | 0.230596808 |
| IL23A     | -0.07279221  | 0.167559919 | 0.230596808 |
| CAD       | 0.072792119  | 0.167560453 | 0.230596808 |
| C10orf108 | -0.072785406 | 0.167599745 | 0.230625189 |
| TAS2R40   | -0.072784638 | 0.167604236 | 0.230625189 |
| EN1       | 0.072772957  | 0.167672621 | 0.230703347 |
| MUC7      | -0.072767939 | 0.167702004 | 0.230727835 |
| CYP27A1   | 0.072748789  | 0.16781418  | 0.230866219 |
| HYAL4     | 0.072732572  | 0.167909212 | 0.230981001 |
| KCP       | 0.072709524  | 0.168044347 | 0.23115093  |
| RAB7L1    | -0.072695699 | 0.168125447 | 0.231246514 |
| HTRA1     | -0.072670661 | 0.168272396 | 0.231432649 |
| CAPRIN1   | -0.072654637 | 0.168366492 | 0.231546073 |
| HIST1H2BB | 0.072648401  | 0.168403121 | 0.231580455 |
| FLJ23867  | -0.072644008 | 0.168428929 | 0.231599953 |
| PEX11A    | -0.072641424 | 0.168444105 | 0.231604829 |
| IL18BP    | 0.072637551  | 0.168466865 | 0.231620132 |
| EGFL6     | -0.072631855 | 0.168500335 | 0.231650157 |
| NEUROD6   | -0.072624377 | 0.16854429  | 0.23169459  |
| MX1       | -0.072544354 | 0.169015155 | 0.232325843 |

|           |              |             |             |
|-----------|--------------|-------------|-------------|
| SFTPC     | 0.072524208  | 0.169133849 | 0.232472953 |
| TSPAN19   | 0.07250047   | 0.169273792 | 0.232649246 |
| CRYM      | 0.072498096  | 0.169287792 | 0.232652431 |
| LOC100287 | 0.072467222  | 0.16946994  | 0.232886686 |
| PIK3R6    | 0.072436435  | 0.169651724 | 0.233120409 |
| TMOD4     | 0.072422069  | 0.169736597 | 0.233220942 |
| ZNF599    | -0.072313934 | 0.170376469 | 0.234083986 |
| SLC35B3   | 0.072305715  | 0.170425175 | 0.234134752 |
| CEBPB     | 0.07230344   | 0.170438664 | 0.234137131 |
| ADD2      | -0.072254015 | 0.170731806 | 0.234523652 |
| ZC3H8     | -0.072240265 | 0.170813425 | 0.234619585 |
| MYADML2   | 0.072215326  | 0.170961534 | 0.234806824 |
| LMF1      | -0.072206118 | 0.171016244 | 0.234865767 |
| SNORA84   | 0.072195615  | 0.171078665 | 0.234924981 |
| POM121L2  | -0.072194894 | 0.171082952 | 0.234924981 |
| APOBEC3B  | 0.072190695  | 0.171107911 | 0.234943054 |
| NHLH1     | 0.072170788  | 0.17122628  | 0.235089374 |
| ZNF574    | 0.072132227  | 0.171455746 | 0.235388196 |
| HMGCL     | 0.072091315  | 0.171699448 | 0.235706522 |
| PRPS1     | -0.072088609 | 0.171715575 | 0.235712412 |
| STRN4     | 0.072077778  | 0.17178014  | 0.235784788 |
| TBX19     | 0.072075285  | 0.171795005 | 0.23578894  |
| FLJ14107  | -0.072071428 | 0.171818002 | 0.235804253 |
| C6orf176  | -0.072031309 | 0.17205736  | 0.236116478 |
| LOC149620 | 0.072024292  | 0.172099249 | 0.23615769  |
| ASB10     | -0.07201995  | 0.172125173 | 0.23617699  |
| DSG4      | -0.072002334 | 0.172230385 | 0.236305071 |
| PNLIPRP2  | 0.071972986  | 0.172405766 | 0.236529404 |
| BCAS3     | -0.071961188 | 0.172476304 | 0.236609878 |
| WNT11     | -0.071950801 | 0.172538426 | 0.236678795 |
| FCGR2A    | -0.071947299 | 0.172559379 | 0.23668059  |
| CNNM3     | -0.071946609 | 0.172563503 | 0.23668059  |
| GOLPH3L   | 0.071939698  | 0.172604849 | 0.236720996 |
| C6orf201  | -0.071927252 | 0.172679332 | 0.236806838 |
| PRND      | -0.071925161 | 0.172691849 | 0.236807697 |
| JPH3      | -0.071921065 | 0.172716364 | 0.236825005 |
| GABPB1    | -0.071886858 | 0.172921229 | 0.237089589 |
| GABRB2    | -0.071877325 | 0.172978354 | 0.237151584 |
| ATP10B    | -0.071848772 | 0.173149532 | 0.237369927 |
| DSC3      | -0.0718365   | 0.173223141 | 0.237454492 |
| HCLS1     | -0.071827344 | 0.173278083 | 0.237513457 |
| CYP1A2    | -0.071822358 | 0.173308    | 0.237538116 |
| KCNN1     | 0.071801712  | 0.173431939 | 0.237691629 |
| PAICS     | -0.071793587 | 0.173480732 | 0.23774214  |
| PTPRQ     | -0.071743638 | 0.17378092  | 0.238137138 |
| TSPYL6    | -0.071718831 | 0.173930149 | 0.238325231 |

|           |              |             |             |
|-----------|--------------|-------------|-------------|
| ZNF185    | -0.071658214 | 0.174295195 | 0.238808999 |
| LOC100133 | -0.071634078 | 0.174440703 | 0.238991924 |
| LHX1      | 0.071569776  | 0.174828806 | 0.239507166 |
| UBXN10    | -0.071567074 | 0.17484513  | 0.239513053 |
| CER1      | 0.071552971  | 0.174930339 | 0.239609417 |
| MKRN2     | -0.071551449 | 0.174939539 | 0.239609417 |
| RAB11B    | 0.071514158  | 0.175165014 | 0.239901744 |
| DCST1     | -0.071506984 | 0.175208415 | 0.239944683 |
| HTRA3     | -0.071493186 | 0.175291911 | 0.240042523 |
| KLHL32    | -0.071483519 | 0.175350432 | 0.24010615  |
| SNORA7B   | -0.071448534 | 0.175562324 | 0.240379765 |
| ZNF541    | -0.071444234 | 0.17558838  | 0.240398913 |
| C13orf39  | -0.071425865 | 0.175699725 | 0.24053482  |
| SNORA71D  | 0.071400716  | 0.175852251 | 0.240727082 |
| NPPC      | -0.071395998 | 0.17588088  | 0.240749723 |
| ZNF761    | -0.07136199  | 0.176087316 | 0.241015732 |
| ZDHHC13   | -0.071359375 | 0.176103192 | 0.241020896 |
| CR1L      | -0.071350831 | 0.176155092 | 0.241075361 |
| MT1H      | 0.071338096  | 0.176232461 | 0.241136934 |
| TARS      | 0.071338055  | 0.176232715 | 0.241136934 |
| PHACTR1   | -0.071337447 | 0.176236408 | 0.241136934 |
| WFS1      | 0.07132506   | 0.17631169  | 0.241223366 |
| CHST1     | -0.071299134 | 0.17646934  | 0.24142247  |
| GSG1L     | -0.071286291 | 0.176547473 | 0.241512772 |
| COMT      | 0.071266467  | 0.176668124 | 0.241661219 |
| HOXA3     | 0.071241738  | 0.176818715 | 0.241850598 |
| CHD7      | -0.07122601  | 0.17691454  | 0.241965048 |
| CGB1      | -0.071217083 | 0.176968953 | 0.242022847 |
| GLOD5     | 0.071197503  | 0.177088331 | 0.242169478 |
| DDX24     | -0.071192514 | 0.177118756 | 0.242194454 |
| KRT2      | -0.071181436 | 0.177186331 | 0.242270221 |
| GALNTL5   | 0.071143353  | 0.177418793 | 0.242571417 |
| GGT3P     | 0.071132807  | 0.177483205 | 0.242642825 |
| TMEM171   | -0.071130648 | 0.177496391 | 0.242644194 |
| GPBAR1    | -0.071119919 | 0.177561944 | 0.242717147 |
| DENND1A   | 0.071115647  | 0.177588049 | 0.242736169 |
| ASAP3     | -0.071106012 | 0.17764694  | 0.242800001 |
| SUMO1P1   | 0.071099817  | 0.177684811 | 0.242835095 |
| C19orf36  | 0.071097757  | 0.177697402 | 0.242835638 |
| TEX12     | 0.071089857  | 0.177745708 | 0.242884985 |
| PLA2G2F   | -0.071079821 | 0.177807091 | 0.242952194 |
| RAB40AL   | 0.071041613  | 0.178040919 | 0.243255001 |
| GAD1      | 0.071024931  | 0.178143079 | 0.243377885 |
| PCSK2     | -0.071021232 | 0.17816574  | 0.243392146 |
| IFNK      | -0.070965857 | 0.178505206 | 0.243839164 |
| C10orf82  | 0.070951526  | 0.178593135 | 0.243927268 |

|           |              |             |             |
|-----------|--------------|-------------|-------------|
| C16orf70  | -0.070951352 | 0.1785942   | 0.243927268 |
| NBAS      | 0.070948407  | 0.178612273 | 0.243935223 |
| INPP5F    | -0.070923127 | 0.178767477 | 0.244130447 |
| ITPKC     | 0.070915884  | 0.178811963 | 0.244174454 |
| LOC390858 | -0.070912584 | 0.178832237 | 0.244185397 |
| KCNG1     | -0.070898085 | 0.178921316 | 0.24429028  |
| CBX2      | 0.070850551  | 0.1792136   | 0.244672574 |
| KCNN4     | 0.070795456  | 0.179552819 | 0.245106231 |
| AP2A2     | 0.070794964  | 0.179555853 | 0.245106231 |
| AKR1CL1   | -0.07078192  | 0.179636229 | 0.245199143 |
| ASH2L     | -0.070761825 | 0.179760114 | 0.245351427 |
| FAM155B   | 0.070732456  | 0.179941292 | 0.245581094 |
| LDHB      | -0.070730551 | 0.179953046 | 0.245581094 |
| CXCL10    | -0.070725813 | 0.179982287 | 0.24560417  |
| BTBD6     | -0.070719924 | 0.18001864  | 0.245636946 |
| SPINK2    | 0.07071458   | 0.180051629 | 0.245665126 |
| CRLF2     | -0.070687088 | 0.180221421 | 0.24587814  |
| KLHL12    | -0.070685304 | 0.180232442 | 0.24587814  |
| SH2D4B    | -0.070669269 | 0.180331539 | 0.24599648  |
| NUPL2     | -0.070658649 | 0.18039719  | 0.246069181 |
| SEMA4A    | 0.070641485  | 0.180503332 | 0.246182425 |
| SNORA38   | 0.070641226  | 0.180504935 | 0.246182425 |
| LOC729668 | -0.070603205 | 0.180740221 | 0.246476809 |
| APCDD1L   | -0.070601447 | 0.180751107 | 0.246476809 |
| CFLP1     | -0.07059998  | 0.180760188 | 0.246476809 |
| HTR3D     | 0.070598349  | 0.180770287 | 0.246476809 |
| TRH       | 0.070593509  | 0.180800261 | 0.2465008   |
| MC2R      | 0.070588066  | 0.180833974 | 0.246529887 |
| VNN1      | -0.07058435  | 0.180856992 | 0.24654439  |
| SPANXB2   | 0.070551836  | 0.181058472 | 0.246802154 |
| IQCF3     | 0.070494943  | 0.181411433 | 0.247266353 |
| ZNF266    | -0.070487162 | 0.181459744 | 0.247315275 |
| PDE4C     | 0.070484571  | 0.181475833 | 0.247320277 |
| FBP2      | -0.070451178 | 0.181683295 | 0.24758607  |
| GRM3      | -0.070441626 | 0.181742671 | 0.247650037 |
| ANKMY2    | -0.07040071  | 0.181997169 | 0.247979859 |
| TMEM55B   | 0.070389382  | 0.182067669 | 0.248058947 |
| C11orf34  | -0.070386763 | 0.182083979 | 0.248060345 |
| KLK5      | 0.070385216  | 0.182093607 | 0.248060345 |
| PIGR      | -0.070369957 | 0.182188619 | 0.248172801 |
| HPR       | 0.070334486  | 0.182409633 | 0.248456866 |
| CEACAM4   | 0.070301253  | 0.182616885 | 0.248722149 |
| UNK       | 0.070294348  | 0.182659963 | 0.248763809 |
| LOC648691 | 0.07027779   | 0.182763306 | 0.24888753  |
| C10orf79  | 0.070270426  | 0.182809281 | 0.248933116 |
| DOK7      | -0.070235184 | 0.183029422 | 0.249215844 |

|          |              |             |             |
|----------|--------------|-------------|-------------|
| KLF1     | 0.070216516  | 0.183146106 | 0.249348485 |
| RAP2B    | -0.070215593 | 0.183151877 | 0.249348485 |
| OR52B6   | 0.070202456  | 0.183234027 | 0.249443273 |
| FAM179A  | -0.070162761 | 0.18348242  | 0.249760875 |
| HLA-DRB1 | 0.070161165  | 0.183492411 | 0.249760875 |
| MST1P9   | 0.070154314  | 0.183535308 | 0.249802191 |
| FAM71E2  | -0.070149118 | 0.183567851 | 0.24981732  |
| PURB     | -0.070147538 | 0.183577744 | 0.24981732  |
| XAGE3    | 0.07014653   | 0.183584056 | 0.24981732  |
| AP3B2    | 0.070132163  | 0.183674055 | 0.249922711 |
| SNORA24  | 0.070123584  | 0.183727811 | 0.249978777 |
| LDHC     | 0.07011551   | 0.183778416 | 0.250030548 |
| C19orf76 | 0.070104875  | 0.183845086 | 0.250104166 |
| NPM2     | 0.070102866  | 0.183857683 | 0.250104218 |
| ALX4     | -0.070084488 | 0.183972939 | 0.25024391  |
| C13orf15 | -0.070073379 | 0.184042636 | 0.250321615 |
| RPA1     | -0.07006717  | 0.184081599 | 0.250357511 |
| HIST3H3  | -0.070025065 | 0.184345979 | 0.250699958 |
| NOX3     | 0.070012638  | 0.184424062 | 0.250773796 |
| CSAG3    | 0.070010494  | 0.184437533 | 0.250773796 |
| C5orf49  | 0.070010412  | 0.184438051 | 0.250773796 |
| C5orf30  | 0.069973001  | 0.184673274 | 0.251076478 |
| GRIN2D   | 0.069923638  | 0.184983989 | 0.25148175  |
| PDK3     | -0.069919562 | 0.185009664 | 0.251499486 |
| TMC7     | 0.069914736  | 0.185040066 | 0.251523645 |
| TAPBPL   | -0.069908294 | 0.185080648 | 0.251561638 |
| BET1     | -0.069888338 | 0.185206421 | 0.251715408 |
| OSBPL7   | 0.069878577  | 0.185267962 | 0.251781865 |
| ZNF470   | -0.069868624 | 0.18533073  | 0.251849983 |
| KIAA0196 | -0.069862216 | 0.185371149 | 0.25188772  |
| HESX1    | -0.069854454 | 0.185420115 | 0.251937066 |
| LRFN2    | 0.069815368  | 0.185666841 | 0.252255091 |
| TMEM114  | -0.069757834 | 0.186030459 | 0.252731877 |
| PKNOX1   | 0.069739351  | 0.186147382 | 0.252873473 |
| ICAM5    | -0.069727116 | 0.186224809 | 0.252961399 |
| TCP10L   | 0.069705209  | 0.18636351  | 0.25313254  |
| NIT1     | 0.069691594  | 0.186449746 | 0.253232401 |
| WSCD1    | 0.06966213   | 0.186636471 | 0.25346872  |
| EMX2     | -0.069624026 | 0.186878152 | 0.253779639 |
| SPRR2B   | -0.069596526 | 0.187052724 | 0.253999386 |
| LZTR1    | -0.069589966 | 0.187094382 | 0.254038632 |
| ATP6V0D1 | 0.069584098  | 0.187131658 | 0.254071923 |
| DPPA3    | 0.069569507  | 0.187224359 | 0.254180456 |
| HEY1     | 0.069559235  | 0.187289639 | 0.254251749 |
| SERPINH1 | 0.069555363  | 0.187314251 | 0.254267828 |
| C19orf38 | 0.069550828  | 0.18734308  | 0.254289629 |

|           |              |             |             |
|-----------|--------------|-------------|-------------|
| TNFSF10   | -0.069519095 | 0.187544897 | 0.254546215 |
| FJX1      | -0.069485181 | 0.187760765 | 0.254821837 |
| RBP1      | 0.069475534  | 0.187822202 | 0.254887847 |
| C9orf116  | 0.069464024  | 0.187895525 | 0.254969977 |
| SLAIN1    | -0.069454166 | 0.187958336 | 0.255037832 |
| LMX1B     | -0.069448041 | 0.187997371 | 0.255073419 |
| OR2T33    | -0.069439659 | 0.188050806 | 0.255128537 |
| PLGLB2    | -0.069435806 | 0.188075364 | 0.255144474 |
| DNAH3     | 0.069387665  | 0.188382479 | 0.255541268 |
| MTIF2     | 0.069385936  | 0.188393517 | 0.255541268 |
| CEACAM1   | -0.06938183  | 0.188419733 | 0.255559421 |
| HOXA6     | -0.06937882  | 0.188438945 | 0.255568073 |
| C10orf122 | -0.069368918 | 0.188502177 | 0.255636422 |
| ZNF676    | 0.069321038  | 0.188808131 | 0.256033905 |
| ADC       | -0.069315837 | 0.188841387 | 0.256061566 |
| IVL       | -0.069289118 | 0.189012307 | 0.256275877 |
| EMID2     | 0.069285044  | 0.189038379 | 0.256293778 |
| ZNF586    | 0.069269416  | 0.189138407 | 0.256411939 |
| C22orf45  | 0.069246156  | 0.189287366 | 0.256596413 |
| TMEM158   | -0.069242525 | 0.189310625 | 0.256604415 |
| ACBD4     | -0.069241212 | 0.189319039 | 0.256604415 |
| OCIAD2    | 0.069220004  | 0.189454941 | 0.256771142 |
| P2RX1     | -0.069214095 | 0.189492824 | 0.256805008 |
| WFDC8     | 0.069209195  | 0.189524237 | 0.256830103 |
| DDB2      | -0.069202192 | 0.189569143 | 0.256873476 |
| LRRTM1    | -0.069166026 | 0.189801169 | 0.257170382 |
| DGKB      | -0.069160519 | 0.189836521 | 0.257200784 |
| SLC22A20  | -0.069139409 | 0.189972072 | 0.257366927 |
| GAP43     | 0.069097059  | 0.190244219 | 0.257718088 |
| RAET1L    | -0.069079832 | 0.190355003 | 0.257850625 |
| SLC5A5    | 0.069072878  | 0.19039974  | 0.257893683 |
| FBXO44    | 0.069059409  | 0.190486403 | 0.25799352  |
| INSL3     | 0.069055011  | 0.190514707 | 0.258014308 |
| IFNA7     | -0.069050067 | 0.19054653  | 0.258039858 |
| TUBA3E    | 0.069024673  | 0.190710047 | 0.258243733 |
| ANKRD45   | -0.06900708  | 0.190823388 | 0.258379641 |
| PCSK1     | -0.068976085 | 0.191023194 | 0.258632599 |
| FNTA      | -0.068971994 | 0.191049573 | 0.25865073  |
| RGSL1     | -0.068951065 | 0.191184593 | 0.258815931 |
| PLCZ1     | -0.06894742  | 0.191208109 | 0.258830172 |
| SULT1A1   | 0.068933027  | 0.191301014 | 0.258938333 |
| WDR24     | -0.068928779 | 0.191328437 | 0.258957852 |
| NKX6-2    | -0.068842319 | 0.19188725  | 0.25969654  |
| C1orf51   | 0.068831418  | 0.19195779  | 0.259774354 |
| SKAP1     | 0.068787125  | 0.192244612 | 0.260129121 |
| ZNF343    | 0.0687869    | 0.192246066 | 0.260129121 |



|           |              |             |             |
|-----------|--------------|-------------|-------------|
| TMEM22    | -0.068781407 | 0.192281661 | 0.260130438 |
| KRT25     | 0.068781321  | 0.192282216 | 0.260130438 |
| C22orf15  | 0.068780703  | 0.192286225 | 0.260130438 |
| SLC29A1   | 0.068756689  | 0.19244188  | 0.260323328 |
| TET1      | 0.068752739  | 0.192467494 | 0.260331295 |
| WNT5B     | -0.068751749 | 0.192473913 | 0.260331295 |
| ZNF19     | -0.068746128 | 0.192510361 | 0.26036291  |
| CDH15     | 0.068737238  | 0.192568028 | 0.260423216 |
| UAP1      | -0.068710449 | 0.192741867 | 0.260640611 |
| SLC17A9   | 0.068649918  | 0.193135077 | 0.261150086 |
| LSM1      | 0.068648416  | 0.193144846 | 0.261150086 |
| C12orf41  | -0.068645353 | 0.193164761 | 0.261151767 |
| UBE2N     | 0.068644191  | 0.193172316 | 0.261151767 |
| ELAC1     | 0.068638436  | 0.193209736 | 0.261184625 |
| DTNA      | -0.068633929 | 0.193239047 | 0.261206517 |
| TAS2R38   | -0.068604793 | 0.193428596 | 0.26144499  |
| CXorf59   | -0.068580163 | 0.19358894  | 0.261643959 |
| ODF3L1    | 0.068553987  | 0.193759461 | 0.261856654 |
| C15orf59  | -0.068543456 | 0.193828094 | 0.261931634 |
| TPD52L3   | -0.068521354 | 0.193972194 | 0.262108579 |
| CLGN      | 0.068503818  | 0.194086576 | 0.262245347 |
| SLC4A3    | -0.068501388 | 0.194102432 | 0.262248978 |
| N6AMT1    | -0.068480187 | 0.194240797 | 0.262418118 |
| CCL16     | 0.068453768  | 0.194413325 | 0.262633385 |
| CLDN1     | -0.068433546 | 0.194545454 | 0.262788348 |
| ATP4B     | 0.068430445  | 0.194565721 | 0.262788348 |
| EIF2C1    | -0.068430154 | 0.194567622 | 0.262788348 |
| C17orf69  | 0.068427668  | 0.194583873 | 0.262792475 |
| DAZ2      | -0.068423982 | 0.194607966 | 0.262793672 |
| RAB6B     | 0.068423495  | 0.194611151 | 0.262793672 |
| RIC3      | -0.068402683 | 0.194747237 | 0.262959606 |
| GOLM1     | -0.068386429 | 0.194853571 | 0.263085347 |
| ARL8A     | -0.068375222 | 0.19492691  | 0.263166525 |
| OR10H1    | -0.068356172 | 0.195051618 | 0.263317039 |
| PDZD3     | 0.068287606  | 0.195500972 | 0.263905772 |
| TSPAN13   | -0.068282796 | 0.195532519 | 0.263930468 |
| LOC100271 | 0.068279052  | 0.195557082 | 0.263945733 |
| MT1DP     | 0.06827364   | 0.195592594 | 0.263975773 |
| C9orf167  | -0.068247021 | 0.195767305 | 0.264193663 |
| SIAH2     | 0.068239868  | 0.195814269 | 0.264237048 |
| CCDC157   | -0.068238083 | 0.19582599  | 0.264237048 |
| KHK       | 0.068220795  | 0.195939548 | 0.264372365 |
| SAMD1     | -0.068209517 | 0.196013654 | 0.264454435 |
| IQSEC1    | -0.068206331 | 0.196034586 | 0.264464759 |
| MYH6      | 0.068203144  | 0.196055535 | 0.264475105 |
| C3orf65   | 0.068178651  | 0.196216563 | 0.264674401 |

|           |              |             |             |
|-----------|--------------|-------------|-------------|
| MOSPD1    | 0.068168148  | 0.196285647 | 0.264749656 |
| CYP26B1   | -0.068155786 | 0.196366982 | 0.264841423 |
| SR140     | -0.068146019 | 0.196431257 | 0.264898665 |
| CT47B1    | 0.068145294  | 0.196436027 | 0.264898665 |
| NEU2      | -0.068126791 | 0.196557845 | 0.265044992 |
| DFFA      | 0.068075636  | 0.196894907 | 0.265481522 |
| ROBO2     | -0.068070345 | 0.196929793 | 0.26549434  |
| TFR2      | -0.06807015  | 0.196931077 | 0.26549434  |
| LOC254559 | 0.068065956  | 0.196958731 | 0.265513649 |
| IL1F5     | -0.068018894 | 0.197269271 | 0.265914278 |
| SNORA31   | 0.068002733  | 0.197375992 | 0.266040127 |
| TMEM50B   | -0.06799716  | 0.197412804 | 0.266071737 |
| PRKACG    | -0.067991773 | 0.197448394 | 0.266101697 |
| SLC27A6   | 0.067988731  | 0.197468489 | 0.26611077  |
| PJA1      | -0.067980811 | 0.19752082  | 0.266163282 |
| ZKSCAN4   | 0.067933803  | 0.19783165  | 0.266564094 |
| RPS6KA1   | -0.067919683 | 0.197925084 | 0.266671947 |
| TTC29     | 0.067901241  | 0.198047166 | 0.266818381 |
| NYX       | 0.067896256  | 0.198080173 | 0.266844798 |
| GUCA1B    | 0.067890667  | 0.198117188 | 0.26687661  |
| CAP1      | -0.067875941 | 0.198214736 | 0.266989954 |
| DNAI1     | 0.067873266  | 0.198232459 | 0.266995767 |
| ATPIB4    | -0.067862827 | 0.198301629 | 0.267070869 |
| IFNW1     | -0.067795688 | 0.198746958 | 0.267652533 |
| LOC100272 | -0.067766452 | 0.1989411   | 0.267895868 |
| C17orf46  | -0.067712918 | 0.199296958 | 0.268356924 |
| WNT1      | -0.067701402 | 0.199373571 | 0.268441935 |
| ANKRD52   | -0.067685645 | 0.199478427 | 0.268564959 |
| TMCO4     | -0.067630793 | 0.199843767 | 0.269017049 |
| HSPA6     | 0.067630424  | 0.199846226 | 0.269017049 |
| WDSUB1    | -0.06762873  | 0.199857517 | 0.269017049 |
| LOC340017 | -0.067627119 | 0.199868253 | 0.269017049 |
| HNRNPA0   | 0.067593618  | 0.200091643 | 0.269299525 |
| HLA-DPA1  | -0.067566297 | 0.200273963 | 0.269526691 |
| PPIEL     | -0.067560788 | 0.200310741 | 0.26955797  |
| TMEM215   | -0.067558559 | 0.200325623 | 0.269559783 |
| CLK2      | 0.067546894  | 0.200403517 | 0.269646378 |
| YTHDF2    | 0.067522171  | 0.200568674 | 0.26983833  |
| FAM55A    | -0.067521483 | 0.200573276 | 0.26983833  |
| BCL11B    | -0.067519219 | 0.200588403 | 0.269840451 |
| CDNF      | -0.067510389 | 0.200647421 | 0.269901614 |
| KCTD15    | -0.06749704  | 0.200736662 | 0.269998909 |
| SLC47A2   | -0.067495514 | 0.200746867 | 0.269998909 |
| CEACAM7   | -0.067438879 | 0.201125832 | 0.270490339 |
| LOC643923 | 0.067432205  | 0.201170526 | 0.270532178 |
| SPACA5    | 0.067415402  | 0.201283075 | 0.270665256 |

|           |              |             |             |
|-----------|--------------|-------------|-------------|
| EPB41L1   | -0.067411748 | 0.201307561 | 0.270679905 |
| RDH12     | 0.067407905  | 0.201333312 | 0.270696253 |
| MGC21881  | -0.067404189 | 0.201358213 | 0.270711456 |
| OTX2      | 0.067399886  | 0.201387053 | 0.270731953 |
| NCRNA0016 | 0.067394312  | 0.201424414 | 0.270763902 |
| SLC17A5   | -0.067391507 | 0.201443215 | 0.270770898 |
| ZNF677    | -0.067388095 | 0.201466088 | 0.270783367 |
| PROK2     | -0.067382344 | 0.201504651 | 0.27081692  |
| CPNE4     | 0.067377801  | 0.201535109 | 0.270839577 |
| ENAM      | -0.067365838 | 0.201615343 | 0.270929119 |
| S100A14   | 0.067349946  | 0.201721964 | 0.271054106 |
| PSMC6     | 0.067345918  | 0.201748996 | 0.271072139 |
| DKFZp566F | 0.067335128  | 0.201821415 | 0.271151149 |
| VWA5B1    | 0.067330225  | 0.201854333 | 0.271177081 |
| CCDC85C   | -0.067314135 | 0.201962371 | 0.271283871 |
| CCDC70    | -0.067313254 | 0.201968292 | 0.271283871 |
| TLE1      | 0.067312301  | 0.20197469  | 0.271283871 |
| TDGF3     | -0.06730763  | 0.202006067 | 0.271307717 |
| ANKRD30A  | 0.067301987  | 0.202043976 | 0.271340331 |
| CHPF2     | -0.067294336 | 0.20209538  | 0.271391065 |
| CENPK     | 0.067260924  | 0.202319974 | 0.27167435  |
| NRCAM     | 0.067254055  | 0.202366173 | 0.271718064 |
| LOC145845 | 0.067211766  | 0.202650752 | 0.272081826 |
| MUC16     | -0.067200855 | 0.202724221 | 0.272162118 |
| C14orf23  | 0.067182029  | 0.202851038 | 0.272314016 |
| C21orf121 | -0.067165671 | 0.202961273 | 0.272443634 |
| DEFA1B    | -0.067128711 | 0.2032105   | 0.272759797 |
| CIRBP     | 0.067116769  | 0.203291073 | 0.272849557 |
| GIPC2     | -0.067111058 | 0.203329616 | 0.272882897 |
| SLCO1B3   | -0.067106762 | 0.203358614 | 0.272903423 |
| CLEC4D    | -0.067104478 | 0.203374032 | 0.272905724 |
| OTUD6B    | -0.067098825 | 0.20341219  | 0.272938536 |
| OR6C70    | 0.06709398   | 0.203444902 | 0.272964038 |
| MBD2      | 0.067086911  | 0.203492638 | 0.273009693 |
| RPS6KB1   | -0.0670811   | 0.203531881 | 0.273043948 |
| TMEM169   | 0.067068498  | 0.203617011 | 0.273136794 |
| OR8G5     | 0.067066794  | 0.203628521 | 0.273136794 |
| KIR2DL4   | 0.067051187  | 0.203733985 | 0.273259854 |
| C2orf74   | 0.067013727  | 0.203987289 | 0.273581175 |
| GDE1      | -0.067006557 | 0.204035798 | 0.273627806 |
| DCST2     | 0.067000785  | 0.204074854 | 0.273661754 |
| TG        | -0.066993113 | 0.204126776 | 0.273712951 |
| SLC25A5   | 0.066985866  | 0.204175831 | 0.273760295 |
| TMEM190   | 0.06696408   | 0.204323347 | 0.273939643 |
| LOC283314 | -0.066947152 | 0.204438019 | 0.274074935 |
| DLEU2L    | -0.066929092 | 0.204560416 | 0.274210869 |

|           |              |             |             |
|-----------|--------------|-------------|-------------|
| LOC387647 | 0.066928128  | 0.204566954 | 0.274210869 |
| HPGDS     | 0.066922637  | 0.20460418  | 0.274242311 |
| TMEM95    | 0.066865087  | 0.204994625 | 0.274747154 |
| CDH8      | -0.066848753 | 0.20510554  | 0.274860291 |
| TM7SF4    | -0.066848591 | 0.205106642 | 0.274860291 |
| PDCD10    | -0.066829977 | 0.205233091 | 0.275011237 |
| TBPL2     | 0.066821447  | 0.205291055 | 0.275070401 |
| A2M       | -0.066814313 | 0.205339541 | 0.275116857 |
| ARID3B    | -0.066774683 | 0.205609052 | 0.275459419 |
| ACCN3     | 0.066764518  | 0.205678222 | 0.275533553 |
| NCRNA0002 | -0.066760674 | 0.205704384 | 0.275550064 |
| C19orf77  | 0.066719759  | 0.20598299  | 0.275904712 |
| POGK      | -0.066689909 | 0.206186429 | 0.276158635 |
| MUS81     | 0.066687809  | 0.206200746 | 0.276159238 |
| LRP3      | 0.066684337  | 0.206224418 | 0.276172368 |
| TXNRD3IT1 | -0.066677122 | 0.206273615 | 0.276219678 |
| IRF9      | -0.06664295  | 0.206506754 | 0.27651328  |
| SLC25A4   | -0.066635608 | 0.206556872 | 0.276561792 |
| NMNAT3    | -0.066613911 | 0.206705028 | 0.276741555 |
| PCDHA2    | 0.066602798  | 0.206780939 | 0.276824577 |
| CLYBL     | -0.066588106 | 0.206881333 | 0.276940361 |
| RBM47     | -0.066552826 | 0.207122546 | 0.277244623 |
| MTMR4     | -0.066472526 | 0.207672327 | 0.277961852 |
| RPS10P7   | 0.066457708  | 0.207773891 | 0.278079102 |
| BCHE      | -0.066438215 | 0.207907558 | 0.278220142 |
| MGAT1     | 0.066437207  | 0.20791447  | 0.278220142 |
| ELP2      | 0.066436229  | 0.207921184 | 0.278220142 |
| MAP2K5    | 0.066428251  | 0.207975907 | 0.278274669 |
| PM20D2    | -0.06639578  | 0.208198754 | 0.278554127 |
| HIST1H2BJ | 0.066365659  | 0.208405632 | 0.278812183 |
| CHD1L     | 0.066357329  | 0.208462873 | 0.278870029 |
| SLC15A3   | -0.066349178 | 0.208518887 | 0.278926225 |
| MTNR1A    | -0.066320412 | 0.208716675 | 0.279172046 |
| KLK8      | 0.066317545  | 0.208736392 | 0.279179667 |
| C11orf36  | 0.066312069  | 0.208774061 | 0.279198385 |
| SELO      | 0.066311435  | 0.208778426 | 0.279198385 |
| ZSWIM2    | -0.066307089 | 0.20880832  | 0.279219613 |
| TSNAXIP1  | -0.066287468 | 0.208943354 | 0.279381422 |
| MS4A4A    | -0.066282951 | 0.208974442 | 0.27940423  |
| FOXL1     | -0.066273722 | 0.209037985 | 0.279470427 |
| ADCK2     | 0.066260766  | 0.209127208 | 0.279570944 |
| HOXA9     | 0.066231609  | 0.209328106 | 0.27982073  |
| DAP       | 0.066211824  | 0.209464504 | 0.279984267 |
| SPIC      | -0.066206719 | 0.20949971  | 0.280012532 |
| CD28      | -0.066197322 | 0.209564524 | 0.280080364 |
| ZNF595    | -0.066189927 | 0.209615546 | 0.280129754 |

|          |              |             |             |
|----------|--------------|-------------|-------------|
| PRG4     | -0.066183085 | 0.20966275  | 0.280174037 |
| ACIN1    | -0.066163294 | 0.20979935  | 0.280337766 |
| SOCS1    | 0.066159084  | 0.209828415 | 0.280357792 |
| NUDT17   | 0.066151745  | 0.209879095 | 0.280406694 |
| STT3A    | 0.066110385  | 0.210164851 | 0.280759052 |
| CCDC109B | -0.066109492 | 0.210171024 | 0.280759052 |
| NCF1C    | -0.066067109 | 0.210464143 | 0.28113176  |
| ORM1     | 0.066037498  | 0.210669109 | 0.281386674 |
| SCNN1G   | -0.066033047 | 0.210699932 | 0.281408969 |
| POF1B    | 0.066025596  | 0.210751531 | 0.281459009 |
| CASP2    | -0.066006437 | 0.210884265 | 0.281617391 |
| ABLIM2   | -0.065985525 | 0.211029208 | 0.281792053 |
| TMEM90A  | -0.06598072  | 0.211062522 | 0.281817641 |
| FRMD5    | -0.065977629 | 0.211083954 | 0.281827363 |
| SCN9A    | -0.065935606 | 0.211375493 | 0.28219769  |
| SPOCK1   | -0.065928319 | 0.211426078 | 0.282246303 |
| PHOX2B   | 0.065924683  | 0.211451321 | 0.28226108  |
| PAX2     | -0.065884655 | 0.211729358 | 0.282613282 |
| USP11    | 0.065879976  | 0.211761874 | 0.28263774  |
| OBFC1    | 0.065872982  | 0.21181049  | 0.282683683 |
| DLG3     | -0.065853026 | 0.211949244 | 0.282849909 |
| RNF148   | 0.065748343  | 0.212678169 | 0.283803654 |
| PTHLH    | -0.065676892 | 0.213176736 | 0.284449895 |
| CFP      | -0.065653845 | 0.21333773  | 0.284644065 |
| TRIM55   | 0.065651968  | 0.213350839 | 0.284644065 |
| MLANA    | -0.065603429 | 0.213690209 | 0.28507774  |
| GUCA1C   | -0.065597253 | 0.213733421 | 0.285116289 |
| CASR     | -0.065588522 | 0.213794509 | 0.285173068 |
| RNF31    | 0.065587077  | 0.213804623 | 0.285173068 |
| FLJ46321 | 0.065564015  | 0.213966065 | 0.285369286 |
| NAT8L    | 0.065560165  | 0.213993021 | 0.285386126 |
| OR10A6   | 0.06552827   | 0.214216458 | 0.285664976 |
| LLGL2    | 0.065515701  | 0.214304557 | 0.285763325 |
| BCL2L15  | -0.06550565  | 0.214375019 | 0.285838144 |
| TMEM61   | 0.065488237  | 0.214497144 | 0.285981832 |
| OR1E1    | -0.065479856 | 0.214555935 | 0.286041067 |
| C17orf67 | 0.065471195  | 0.214616707 | 0.286102933 |
| CSPP1    | -0.065451048 | 0.214758119 | 0.286272285 |
| HTR1A    | 0.065447519  | 0.214782902 | 0.286286158 |
| SYK      | -0.065440277 | 0.214833748 | 0.286334767 |
| SFTA3    | -0.065421629 | 0.214964733 | 0.286490173 |
| ABCD1    | 0.065419104  | 0.214982477 | 0.286494648 |
| RNASE6   | 0.065399523  | 0.21512008  | 0.286658842 |
| EXOC6    | 0.065375158  | 0.215291397 | 0.286867936 |
| C5orf52  | 0.065357669  | 0.215414426 | 0.287012664 |
| C10orf54 | -0.065352205 | 0.215452876 | 0.287044689 |

|          |              |             |             |
|----------|--------------|-------------|-------------|
| SOX1     | -0.065332223 | 0.215593519 | 0.287212852 |
| TUBA4B   | 0.065327857  | 0.21562426  | 0.287228076 |
| FMR1NB   | 0.06532607   | 0.215636847 | 0.287228076 |
| CCR3     | 0.065324455  | 0.215648215 | 0.287228076 |
| ARC      | -0.065320052 | 0.215679222 | 0.287250164 |
| CCNK     | -0.065309422 | 0.215754094 | 0.287330666 |
| GRM1     | -0.065306693 | 0.215773317 | 0.287333116 |
| C7orf63  | -0.065305064 | 0.21578479  | 0.287333116 |
| TSNAX    | 0.065285413  | 0.215923256 | 0.287498272 |
| LDHAL6A  | -0.065281411 | 0.215951468 | 0.287516612 |
| REN      | -0.06527024  | 0.21603022  | 0.287602234 |
| ZNF554   | 0.065267783  | 0.216047538 | 0.287606065 |
| COL9A1   | 0.065261078  | 0.216094824 | 0.287649785 |
| DAZ3     | -0.06524661  | 0.21619687  | 0.287766386 |
| SNORA2B  | -0.065236053 | 0.216271347 | 0.28784628  |
| DGKK     | 0.065211586  | 0.216444041 | 0.288052464 |
| KLK6     | 0.065209449  | 0.216459129 | 0.288052464 |
| C12orf50 | 0.065207959  | 0.216469655 | 0.288052464 |
| ALLC     | -0.065205124 | 0.216489668 | 0.288059847 |
| ARL11    | -0.065195605 | 0.216556895 | 0.288130048 |
| IFT52    | 0.065180817  | 0.216661355 | 0.288249775 |
| FAM86B1  | -0.065168571 | 0.216747891 | 0.288345642 |
| SPDYE8P  | 0.065135156  | 0.216984135 | 0.288640641 |
| CPT1C    | -0.065128283 | 0.217032752 | 0.288686031 |
| OR6C68   | -0.065114506 | 0.217130224 | 0.288796287 |
| DFNB59   | 0.065112469  | 0.217144645 | 0.288796287 |
| DOC2A    | 0.065072192  | 0.217429798 | 0.289156222 |
| BCKDK    | -0.065048016 | 0.217601093 | 0.289364702 |
| INTS9    | -0.065035532 | 0.217689578 | 0.289463039 |
| CYP2E1   | 0.06502022   | 0.217798151 | 0.289588075 |
| TRIM67   | 0.065011216  | 0.217862013 | 0.289650175 |
| SCARNA11 | 0.065008225  | 0.217883226 | 0.289650175 |
| NDUFAF1  | -0.065007484 | 0.217888489 | 0.289650175 |
| IFNAR2   | -0.064998832 | 0.217949872 | 0.289712435 |
| APOL4    | -0.064996462 | 0.217966689 | 0.289714458 |
| OBSCN    | -0.064994517 | 0.217980489 | 0.289714458 |
| KBTBD13  | -0.064991691 | 0.218000542 | 0.289721775 |
| TTLL10   | -0.064964117 | 0.218196285 | 0.289962566 |
| ZNF280B  | -0.064941284 | 0.218358464 | 0.290158725 |
| C7orf52  | 0.064925943  | 0.21846748  | 0.290284218 |
| SPINK5   | 0.064888656  | 0.218732611 | 0.290607051 |
| HCRTR1   | 0.064887669  | 0.218739628 | 0.290607051 |
| DIRAS2   | -0.064866395 | 0.218891006 | 0.290788766 |
| KIAA1257 | 0.064846302  | 0.219034047 | 0.290959382 |
| C14orf28 | 0.064842607  | 0.219060362 | 0.290974928 |
| C5orf38  | -0.064833452 | 0.219125564 | 0.291025863 |

|           |              |             |             |
|-----------|--------------|-------------|-------------|
| IL22      | 0.064833119  | 0.219127934 | 0.291025863 |
| TSR1      | -0.064819395 | 0.219225701 | 0.291132593 |
| NET1      | -0.064815979 | 0.219250039 | 0.291132593 |
| OR9I1     | -0.064815683 | 0.219252153 | 0.291132593 |
| PHAX      | -0.064810146 | 0.219291606 | 0.291165567 |
| GPI       | 0.064791128  | 0.219427171 | 0.29132614  |
| PDCD4     | -0.064786246 | 0.219461981 | 0.291352933 |
| DCHS2     | -0.064780326 | 0.219504194 | 0.291375302 |
| OR2AE1    | -0.06477978  | 0.219508092 | 0.291375302 |
| HOXC8     | 0.064776807  | 0.219529292 | 0.291384021 |
| FHDC1     | -0.064765148 | 0.21961246  | 0.291474985 |
| BCORL1    | -0.064731455 | 0.219852918 | 0.291755427 |
| GABRB3    | -0.064731435 | 0.21985306  | 0.291755427 |
| IDH1      | -0.064712557 | 0.219987869 | 0.291914873 |
| DCAF16    | -0.06467774  | 0.22023666  | 0.292225537 |
| TBL1XR1   | -0.064675209 | 0.220254757 | 0.292230079 |
| PPP3CB    | -0.064665624 | 0.220323284 | 0.292301526 |
| CXorf64   | 0.064659311  | 0.220368433 | 0.292341949 |
| PCDHB5    | -0.064590936 | 0.220857806 | 0.292971638 |
| RLN1      | 0.064587827  | 0.220880075 | 0.292981663 |
| LOC100128 | 0.064580827  | 0.220930225 | 0.293028667 |
| FIGF      | 0.064573845  | 0.220980252 | 0.293075501 |
| ZSCAN10   | 0.064557631  | 0.221096459 | 0.293210093 |
| ZFP82     | 0.064554901  | 0.221116025 | 0.293216516 |
| LOC151162 | -0.064548438 | 0.221162368 | 0.293258443 |
| EFHC1     | 0.06454159   | 0.221211468 | 0.29330402  |
| HSPBAP1   | 0.064523813  | 0.221338972 | 0.29345354  |
| ZG16      | 0.064511046  | 0.221430581 | 0.293546907 |
| PABPC1P2  | 0.06450989   | 0.221438874 | 0.293546907 |
| NGEF      | 0.064503333  | 0.221485936 | 0.29358975  |
| RAP1GAP2  | -0.06449534  | 0.221543305 | 0.293646251 |
| DOCK3     | 0.064488419  | 0.221592994 | 0.293692565 |
| C9orf44   | -0.06446517  | 0.221759967 | 0.293894307 |
| GALR1     | -0.064441289 | 0.221931573 | 0.294102161 |
| ORAI2     | -0.064425417 | 0.222045677 | 0.294233792 |
| PRSS38    | 0.06442313   | 0.22206212  | 0.294236003 |
| MTERFD2   | 0.064405432  | 0.22218941  | 0.294385077 |
| DERL1     | 0.064403231  | 0.22220524  | 0.294386466 |
| PDYN      | 0.064383199  | 0.222349384 | 0.294557838 |
| HLA-DOA   | -0.064366011 | 0.222473121 | 0.294702156 |
| VAPB      | -0.064359125 | 0.222522708 | 0.294729771 |
| CCL25     | 0.064359005  | 0.222523567 | 0.294729771 |
| MEI1      | 0.064354911  | 0.222553051 | 0.294749219 |
| PHOX2A    | 0.064334065  | 0.222703225 | 0.294928496 |
| SLC9A11   | -0.064306711 | 0.222900385 | 0.295169969 |
| DPY19L2P4 | -0.064301205 | 0.222940085 | 0.295202912 |

|           |              |             |             |
|-----------|--------------|-------------|-------------|
| AGRP      | 0.064255038  | 0.223273178 | 0.295624316 |
| KIAA0090  | -0.06424884  | 0.223317923 | 0.295663904 |
| KRT37     | 0.064234906  | 0.223418534 | 0.295777446 |
| FAM26D    | -0.064228971 | 0.223461402 | 0.295814533 |
| HHIPL1    | -0.064222978 | 0.223504692 | 0.295852173 |
| DFNA5     | -0.064217861 | 0.223541662 | 0.295881443 |
| HS3ST6    | 0.064204018  | 0.223641688 | 0.29599368  |
| CACNB1    | -0.064202013 | 0.223656184 | 0.29599368  |
| LOC100130 | -0.064190284 | 0.223740966 | 0.296086207 |
| CFC1B     | 0.064178995  | 0.22382259  | 0.296174544 |
| IL12RB1   | -0.064173364 | 0.223863309 | 0.296208743 |
| ARL9      | 0.064167826  | 0.223903366 | 0.296242063 |
| SNAPC4    | 0.064156682  | 0.223983981 | 0.296329037 |
| SLC7A3    | 0.064153771  | 0.224005045 | 0.296337218 |
| LOC388946 | -0.06409015  | 0.22446571  | 0.296926909 |
| SDHAP2    | -0.064083148 | 0.22451645  | 0.29695587  |
| C18orf10  | 0.064083014  | 0.224517426 | 0.29695587  |
| UNC13A    | -0.064072537 | 0.224593363 | 0.29703658  |
| CHP2      | 0.064047755  | 0.224773062 | 0.297254501 |
| RAD51L3   | -0.064010249 | 0.225045215 | 0.297594651 |
| TTLL3     | -0.064006524 | 0.225072258 | 0.297610652 |
| ACTL7B    | 0.063999396  | 0.225124009 | 0.297659317 |
| CCDC92    | -0.063991157 | 0.225183841 | 0.297718662 |
| SLC22A9   | 0.063981127  | 0.225256696 | 0.297795214 |
| OR1N1     | -0.06396043  | 0.225407078 | 0.297974242 |
| C1orf94   | -0.063950245 | 0.225481113 | 0.298052328 |
| ANO10     | 0.06392173   | 0.225688469 | 0.298306621 |
| ANKRD37   | 0.06391523   | 0.225735752 | 0.298347623 |
| LOC284578 | -0.063913347 | 0.225749452 | 0.298347623 |
| ZNF157    | -0.06390037  | 0.225843879 | 0.298452611 |
| CXCL2     | -0.063883517 | 0.225966554 | 0.298594912 |
| FCGR1C    | 0.063840719  | 0.226278303 | 0.298987022 |
| CSF2      | -0.063827671 | 0.226373405 | 0.299092838 |
| OXNAD1    | -0.063812826 | 0.226481639 | 0.29921599  |
| ZNF362    | -0.063784512 | 0.226688184 | 0.299469001 |
| HSP90AB2P | -0.063779407 | 0.226725438 | 0.299498349 |
| ZFAND6    | -0.063775985 | 0.226750414 | 0.299511474 |
| TAP2      | 0.063752968  | 0.226918443 | 0.299713542 |
| GABRG3    | 0.063736813  | 0.227036433 | 0.299849497 |
| SLC37A2   | -0.063722266 | 0.227142716 | 0.299969973 |
| MOG       | -0.063710166 | 0.227231151 | 0.300066864 |
| FCGR3A    | -0.063694526 | 0.227345492 | 0.30019795  |
| TSPAN3    | -0.063682555 | 0.227433034 | 0.300293634 |
| PON1      | -0.063662207 | 0.227581895 | 0.300470263 |
| INA       | -0.063655879 | 0.227628204 | 0.300510901 |
| PARVB     | 0.063653878  | 0.227642855 | 0.300510901 |



|           |              |             |             |
|-----------|--------------|-------------|-------------|
| C6orf145  | 0.063648183  | 0.227684538 | 0.300546004 |
| MINPP1    | -0.063630681 | 0.22781267  | 0.300695209 |
| CHST10    | 0.063628449  | 0.227829015 | 0.300696855 |
| NXNL1     | -0.063620017 | 0.227890771 | 0.300758429 |
| SLC44A5   | 0.063612403  | 0.227946547 | 0.300812105 |
| ZNF853    | -0.06360242  | 0.228019685 | 0.300888684 |
| C14orf178 | -0.063585003 | 0.228147333 | 0.301037178 |
| CLEC10A   | -0.063567002 | 0.228279316 | 0.301191372 |
| CYP17A1   | 0.063545316  | 0.228438384 | 0.30138128  |
| HBBP1     | 0.063503282  | 0.22874694  | 0.301768369 |
| LOC374491 | -0.063498999 | 0.228778394 | 0.301789873 |
| PPP2R2B   | 0.063431825  | 0.229272149 | 0.302421172 |
| IL23R     | -0.063423725 | 0.229331734 | 0.302479733 |
| SDCCAG8   | -0.063420988 | 0.229351871 | 0.302486259 |
| NTSR2     | -0.063418879 | 0.229367391 | 0.302486696 |
| DNAJC5B   | 0.063411831  | 0.229419258 | 0.302535063 |
| SREBF2    | -0.063389798 | 0.229581446 | 0.302728894 |
| SLC32A1   | 0.063360368  | 0.229798207 | 0.302994656 |
| OR2C3     | 0.063344482  | 0.229915278 | 0.303128948 |
| AMAC1L2   | -0.063329671 | 0.230024464 | 0.303252827 |
| HBA1      | -0.063287569 | 0.230335031 | 0.303642162 |
| SUMF2     | 0.063268202  | 0.230477991 | 0.30381051  |
| PRAMEF17  | 0.063238818  | 0.23069502  | 0.304076466 |
| BCL2L10   | -0.06322074  | 0.230828613 | 0.304232418 |
| HNRNPUL1  | -0.063151634 | 0.231339794 | 0.304885977 |
| C15orf53  | 0.063148827  | 0.231360575 | 0.304893187 |
| KEL       | -0.063144898 | 0.231389665 | 0.304911347 |
| PARP10    | 0.063118538  | 0.231584891 | 0.305148413 |
| AKAP14    | 0.063107741  | 0.231664891 | 0.305233629 |
| OSBPL3    | -0.063094178 | 0.231765411 | 0.305345869 |
| TMEM55A   | -0.063053634 | 0.23206608  | 0.305721768 |
| MCART2    | -0.063039187 | 0.232173283 | 0.305842766 |
| FLJ22536  | -0.063031403 | 0.23223106  | 0.305898641 |
| PMCHL2    | -0.06302064  | 0.232310962 | 0.305983651 |
| CRX       | 0.063015706  | 0.232347601 | 0.306011671 |
| RHBDF2    | -0.062969919 | 0.232687776 | 0.30643943  |
| STOX1     | 0.062967609  | 0.232704948 | 0.30644178  |
| C9orf4    | 0.062965312  | 0.232722022 | 0.306444001 |
| AADAC     | -0.062953874 | 0.232807064 | 0.306535714 |
| C22orf25  | 0.062934791  | 0.232948995 | 0.306702316 |
| IGF2      | -0.06292087  | 0.233052576 | 0.306818407 |
| KLHL17    | 0.062913225  | 0.233109471 | 0.306873024 |
| SOX21     | -0.062907897 | 0.233149128 | 0.306904943 |
| OR2T34    | -0.06285898  | 0.233513456 | 0.307364209 |
| C9orf9    | 0.062828225  | 0.23374272  | 0.307645645 |
| ADAM18    | 0.062802072  | 0.233937806 | 0.307882064 |

|           |              |             |             |
|-----------|--------------|-------------|-------------|
| ELAC2     | 0.062793647  | 0.234000673 | 0.307944453 |
| BTBD9     | 0.062732497  | 0.234457345 | 0.308525045 |
| OR9A4     | 0.062723814  | 0.234522245 | 0.308590057 |
| OR51B2    | -0.062691029 | 0.234767389 | 0.308878876 |
| TSPY4     | 0.062690311  | 0.234772762 | 0.308878876 |
| CD24      | 0.062658892  | 0.235007865 | 0.309167765 |
| C19orf51  | -0.062654415 | 0.235041383 | 0.309191436 |
| METTL3    | -0.062636586 | 0.235174886 | 0.309346622 |
| OR2A5     | -0.062588969 | 0.235531695 | 0.309795502 |
| EPHX4     | 0.062586853  | 0.235547558 | 0.309795906 |
| TMEM187   | 0.062583777  | 0.235570619 | 0.309805776 |
| ARF4      | -0.062576793 | 0.235622993 | 0.309854193 |
| WDR41     | -0.062550752 | 0.235818339 | 0.310061987 |
| LCN10     | 0.062550012  | 0.235823897 | 0.310061987 |
| ARF1      | 0.062547888  | 0.23583983  | 0.310061987 |
| GNAT1     | 0.062546906  | 0.235847201 | 0.310061987 |
| FTMT      | 0.062545354  | 0.235858852 | 0.310061987 |
| ZIC4      | 0.062542546  | 0.235879923 | 0.310069219 |
| KRT15     | 0.062527417  | 0.235993487 | 0.310198026 |
| FBXW5     | 0.062493294  | 0.236249768 | 0.310514396 |
| CNTD2     | -0.062482401 | 0.236331624 | 0.310601484 |
| CYTH4     | 0.062479993  | 0.236349719 | 0.310604768 |
| KIAA1751  | 0.062425043  | 0.236762958 | 0.311127306 |
| CC2D2A    | -0.062416118 | 0.236830126 | 0.311195036 |
| CDX1      | -0.062386161 | 0.237055669 | 0.311470849 |
| PRH2      | -0.062379676 | 0.237104516 | 0.311514477 |
| MANEAL    | 0.062359375  | 0.237257472 | 0.31169397  |
| GPRC5C    | 0.062357389  | 0.237272437 | 0.31169397  |
| TRIM71    | 0.062351722  | 0.237315152 | 0.31172952  |
| SNORD115- | -0.062333531 | 0.237452288 | 0.311889086 |
| LOC389705 | 0.062311728  | 0.237616728 | 0.312084492 |
| FCER2     | 0.062301121  | 0.237696759 | 0.312169015 |
| PLAC8     | -0.062288618 | 0.237791118 | 0.312269586 |
| FOXS1     | 0.062284788  | 0.237820023 | 0.312269586 |
| ZNF732    | 0.062284741  | 0.237820377 | 0.312269586 |
| COPS4     | -0.062275154 | 0.23789276  | 0.312344035 |
| LARP4B    | -0.062269707 | 0.237933888 | 0.312377439 |
| CRYBA1    | 0.06226519   | 0.237967993 | 0.31240162  |
| KIR2DL1   | -0.062239843 | 0.238159463 | 0.312632371 |
| GPR39     | -0.0622103   | 0.238382769 | 0.31290488  |
| SPACA3    | 0.062194577  | 0.23850167  | 0.313040319 |
| TEX11     | 0.062180615  | 0.238607298 | 0.31315832  |
| HIC2      | 0.062171245  | 0.238678197 | 0.313230728 |
| CGB2      | 0.062153498  | 0.238812524 | 0.313386361 |
| OTUB2     | 0.062120378  | 0.23906336  | 0.313694855 |
| SIX1      | 0.0621021    | 0.239201871 | 0.313855927 |

|           |              |             |             |
|-----------|--------------|-------------|-------------|
| CLDN4     | 0.062088723  | 0.239303275 | 0.313968293 |
| APOBEC3F  | -0.062084462 | 0.239335575 | 0.313989986 |
| CCDC116   | -0.062072548 | 0.239425924 | 0.314087825 |
| TSC1      | -0.062057243 | 0.239542023 | 0.314200697 |
| ALDH7A1   | -0.062056279 | 0.239549337 | 0.314200697 |
| ALDH3B1   | 0.062054967  | 0.239559296 | 0.314200697 |
| IGSF6     | -0.062046873 | 0.239620708 | 0.314260547 |
| LOC400752 | 0.062024594  | 0.239789822 | 0.314461629 |
| VAMP2     | -0.062006359 | 0.239928298 | 0.314608178 |
| ANTXRL    | -0.062005718 | 0.239933167 | 0.314608178 |
| NUP43     | 0.061981455  | 0.240117504 | 0.314829158 |
| SLC6A11   | -0.061970303 | 0.240202267 | 0.314919563 |
| SPATA2    | 0.061965614  | 0.240237914 | 0.314945563 |
| ZNF135    | -0.061958554 | 0.240291592 | 0.314995198 |
| PTBP2     | -0.06195325  | 0.240331924 | 0.315027333 |
| SSX7      | 0.061870925  | 0.24095853  | 0.315827901 |
| KIAA0664  | -0.061860653 | 0.241036799 | 0.315909698 |
| NFATC4    | 0.061845292  | 0.241153866 | 0.316042329 |
| SLITRK5   | -0.061841881 | 0.241179872 | 0.316055613 |
| FBXO18    | -0.061831362 | 0.241260068 | 0.316139904 |
| RNF175    | -0.061826478 | 0.241297311 | 0.316167902 |
| NCRNA0011 | -0.061822518 | 0.241327509 | 0.316186668 |
| OSR2      | 0.061812102  | 0.241406961 | 0.316269958 |
| TM9SF4    | -0.061801341 | 0.241489059 | 0.316356704 |
| LGALS9    | 0.061794243  | 0.241543224 | 0.316406847 |
| CAPN8     | 0.061785244  | 0.241611904 | 0.316475998 |
| KIAA2022  | -0.061781145 | 0.24164319  | 0.31649616  |
| FOXN1     | -0.061760082 | 0.241804012 | 0.31667851  |
| GLT25D1   | 0.061758746  | 0.241814215 | 0.31667851  |
| ZNF585A   | 0.061755693  | 0.241837532 | 0.31668822  |
| NCAPD2    | 0.061724628  | 0.242074887 | 0.316978195 |
| ACO2      | -0.061718152 | 0.242124382 | 0.317022161 |
| TMPRSS11D | -0.061711943 | 0.242171851 | 0.317063468 |
| FFAR2     | 0.061671212  | 0.242483387 | 0.317450476 |
| TSKU      | -0.061649674 | 0.242648241 | 0.317645417 |
| KRTAP5-9  | 0.061646876  | 0.242669665 | 0.317652582 |
| BEND5     | 0.061634268  | 0.242766206 | 0.317758067 |
| FIGNL1    | -0.061609549 | 0.242955564 | 0.317972867 |
| SPG7      | -0.061608677 | 0.242962246 | 0.317972867 |
| FAM46B    | 0.061604714  | 0.242992617 | 0.317984785 |
| PRAMEF4   | -0.061603321 | 0.243003286 | 0.317984785 |
| KLHL35    | 0.06156515   | 0.243295941 | 0.318346824 |
| FBXL22    | -0.061554472 | 0.243377854 | 0.318423185 |
| MC5R      | -0.061553374 | 0.243386278 | 0.318423185 |
| WVOX      | -0.061523986 | 0.243611818 | 0.318697323 |
| OR52R1    | -0.061518764 | 0.243651909 | 0.318728834 |

|           |              |             |             |
|-----------|--------------|-------------|-------------|
| CERCAM    | -0.06151473  | 0.243682882 | 0.318748414 |
| TLR9      | 0.06150686   | 0.243743315 | 0.318806523 |
| EPDR1     | -0.061444967 | 0.244218976 | 0.31940769  |
| C1orf115  | 0.061433556  | 0.244306744 | 0.319501497 |
| TBC1D10C  | 0.061407904  | 0.244504124 | 0.319738633 |
| TMEM202   | 0.061399531  | 0.244568568 | 0.319801906 |
| NR0B2     | 0.061335188  | 0.245064238 | 0.320424727 |
| HK2       | -0.061333526 | 0.24507705  | 0.320424727 |
| PRSS3     | 0.061330909  | 0.245097227 | 0.320430071 |
| WDR69     | 0.061320583  | 0.245176846 | 0.320513121 |
| PNLDC1    | 0.06131703   | 0.245204247 | 0.320527901 |
| ACTA2     | -0.061312775 | 0.245237066 | 0.320549762 |
| SNORD115- | -0.061297989 | 0.245351122 | 0.320677798 |
| CNNM2     | 0.061282967  | 0.245467045 | 0.320808256 |
| SAA2      | -0.061261182 | 0.24563522  | 0.321006982 |
| SPINK14   | -0.061255782 | 0.245676916 | 0.321040406 |
| LMO4      | -0.061194799 | 0.246148167 | 0.321632653 |
| C9orf144  | -0.061192954 | 0.246162435 | 0.321632653 |
| C2orf15   | -0.061173343 | 0.246314121 | 0.32180973  |
| KLHL21    | -0.061168014 | 0.246355353 | 0.321842486 |
| GIMAP5    | -0.061161659 | 0.246404529 | 0.321875404 |
| FAM71D    | 0.06116058   | 0.246412875 | 0.321875404 |
| GH1       | 0.061148853  | 0.246503644 | 0.321961163 |
| FIP1L1    | -0.06114792  | 0.246510862 | 0.321961163 |
| TMPRSS5   | 0.061130754  | 0.246643766 | 0.322082428 |
| C6orf115  | -0.061129748 | 0.246651552 | 0.322082428 |
| NHLRC4    | 0.06112834   | 0.246662459 | 0.322082428 |
| SOLH      | -0.061127573 | 0.246668401 | 0.322082428 |
| FOXB1     | -0.061103401 | 0.246855643 | 0.322305784 |
| C17orf88  | -0.061075743 | 0.247070006 | 0.322564518 |
| PUS7      | -0.06102952  | 0.247428558 | 0.323011454 |
| FAM19A5   | -0.061009485 | 0.247584076 | 0.323193292 |
| C7orf28B  | -0.061002908 | 0.247635145 | 0.32323877  |
| OCM2      | 0.060997873  | 0.247674248 | 0.323268624 |
| KIF19     | -0.060995026 | 0.247696363 | 0.323276301 |
| C3orf14   | 0.060972815  | 0.247868908 | 0.323480295 |
| RYR3      | 0.060940566  | 0.248119588 | 0.323786226 |
| ARMS2     | 0.060933077  | 0.248177824 | 0.323813636 |
| ZNF208    | -0.060931877 | 0.248187157 | 0.323813636 |
| CXCR5     | -0.060931592 | 0.248189372 | 0.323813636 |
| C5orf58   | 0.060887243  | 0.248534463 | 0.324242635 |
| CDKN1C    | 0.06088363   | 0.248562597 | 0.324258097 |
| CXCR3     | 0.060860483  | 0.248742848 | 0.324471987 |
| C6orf35   | 0.060854274  | 0.248791223 | 0.324513833 |
| ACTL7A    | -0.060839981 | 0.248902587 | 0.324622782 |
| LGMN      | 0.06083937   | 0.24890735  | 0.324622782 |

|           |              |             |             |
|-----------|--------------|-------------|-------------|
| LOC100270 | 0.060832554  | 0.248960473 | 0.324670802 |
| TTY14     | 0.06082831   | 0.248993553 | 0.32469268  |
| DGKH      | 0.060818721  | 0.249068309 | 0.324768897 |
| PTH2R     | 0.060801065  | 0.249205988 | 0.324927147 |
| C1orf174  | 0.060797667  | 0.249232492 | 0.324933602 |
| FAM45A    | -0.060796247 | 0.249243571 | 0.324933602 |
| NKX6-3    | 0.060785099  | 0.249330541 | 0.325025707 |
| MYH13     | -0.060756643 | 0.249552637 | 0.325293936 |
| CPB1      | -0.060743435 | 0.249655768 | 0.325397632 |
| TMEM98    | 0.06074227   | 0.249664867 | 0.325397632 |
| ACYP2     | -0.060719231 | 0.249844835 | 0.325610882 |
| EIF1AY    | 0.060699625  | 0.249998061 | 0.325789254 |
| ACCN4     | 0.060695959  | 0.250026718 | 0.32580528  |
| SEMA3F    | 0.060658973  | 0.250315976 | 0.326148122 |
| IPO13     | 0.060658129  | 0.250322573 | 0.326148122 |
| C10orf53  | 0.060645754  | 0.250419408 | 0.326252944 |
| GLE1      | 0.060641491  | 0.250452772 | 0.326266003 |
| ACPP      | 0.060640287  | 0.250462197 | 0.326266003 |
| B3GALT4   | 0.060628465  | 0.250554738 | 0.326365204 |
| ELAVL1    | -0.060587551 | 0.250875196 | 0.326761251 |
| RAX2      | -0.060555381 | 0.251127368 | 0.32706831  |
| TMEM82    | 0.060482128  | 0.251702232 | 0.327795577 |
| HMP19     | 0.060477787  | 0.251736326 | 0.3277975   |
| C1QTNF3   | 0.060477749  | 0.251736629 | 0.3277975   |
| GTF2IRD1  | 0.060470238  | 0.251795626 | 0.327839885 |
| TRIM6-TRI | -0.060467664 | 0.25181585  | 0.327839885 |
| CTF1      | -0.060467318 | 0.251818565 | 0.327839885 |
| C2CD2L    | -0.060462143 | 0.251859228 | 0.32787139  |
| 44079     | 0.060457157  | 0.251898406 | 0.327900958 |
| FA2H      | -0.060450247 | 0.251952706 | 0.327931294 |
| OR1B1     | -0.060450001 | 0.251954644 | 0.327931294 |
| FERMT1    | 0.060446457  | 0.251982492 | 0.327946106 |
| SYN2      | -0.060439714 | 0.2520355   | 0.327993661 |
| SUPT7L    | 0.060435361  | 0.252069722 | 0.328016761 |
| C19orf66  | 0.060426752  | 0.252137409 | 0.328083404 |
| ENAH      | -0.060406528 | 0.25229647  | 0.328268928 |
| KCTD13    | -0.060367473 | 0.252603838 | 0.328647379 |
| C17orf77  | -0.060327373 | 0.252919696 | 0.329020428 |
| SFTPA2    | -0.060326055 | 0.252930086 | 0.329020428 |
| HCG22     | -0.06032478  | 0.252940133 | 0.329020428 |
| LOC400043 | 0.06031041   | 0.253053395 | 0.329146259 |
| EED       | 0.060289226  | 0.253220429 | 0.329342009 |
| OR5H6     | 0.060278051  | 0.253308575 | 0.329435138 |
| LRRC6     | -0.060249138 | 0.253536725 | 0.329710323 |
| NUDT9P1   | -0.060237485 | 0.25362872  | 0.32980842  |
| AQP12A    | 0.060229539  | 0.253691465 | 0.329868472 |

|           |              |             |             |
|-----------|--------------|-------------|-------------|
| HTR1F     | -0.060209285 | 0.253851449 | 0.330040511 |
| SLC22A16  | 0.060206751  | 0.253871465 | 0.330040511 |
| KIR3DP1   | -0.06020422  | 0.253891463 | 0.330040511 |
| PRKDC     | -0.060202712 | 0.25390338  | 0.330040511 |
| CCNB3     | -0.0602023   | 0.253906637 | 0.330040511 |
| ICOS      | 0.060180379  | 0.254079885 | 0.330244153 |
| GJB6      | 0.060157839  | 0.25425811  | 0.330454236 |
| C6orf192  | -0.060145786 | 0.254353454 | 0.33055658  |
| NCRNA0009 | -0.060138779 | 0.254408891 | 0.330607051 |
| ZNF212    | 0.060127139  | 0.254501006 | 0.330705177 |
| NCRNA0009 | 0.06009944   | 0.254720284 | 0.330968517 |
| VPS37B    | -0.060094584 | 0.254758741 | 0.33099689  |
| DARS2     | -0.060073035 | 0.254929452 | 0.331193771 |
| PPP5C     | -0.060071257 | 0.254943536 | 0.331193771 |
| DDX42     | -0.060064206 | 0.254999414 | 0.331244755 |
| LRRC26    | 0.060061342  | 0.255022115 | 0.331244913 |
| LBX1      | 0.060059993  | 0.255032802 | 0.331244913 |
| TRIM47    | 0.060042104  | 0.255174614 | 0.331407489 |
| HIPK4     | 0.060032202  | 0.255253136 | 0.331487852 |
| FGFRL1    | -0.06002084  | 0.255343251 | 0.331583258 |
| OSBPL6    | -0.059972696 | 0.255725354 | 0.332057797 |
| DNAJA1    | 0.059960419  | 0.255822856 | 0.332162745 |
| TXLNA     | -0.059946609 | 0.255932557 | 0.332283517 |
| GNAL      | -0.059918492 | 0.256156021 | 0.332538826 |
| TAS1R2    | -0.059917665 | 0.256162598 | 0.332538826 |
| PAX6      | 0.059909702  | 0.256225909 | 0.332599334 |
| CCDC78    | -0.059894927 | 0.256343405 | 0.332730164 |
| AIRE      | 0.059880665  | 0.256456863 | 0.332855737 |
| PPP2R2C   | 0.059859843  | 0.256622572 | 0.333049106 |
| CGB       | -0.059856731 | 0.256647343 | 0.333049464 |
| PECAM1    | 0.059855606  | 0.256656295 | 0.333049464 |
| AQP2      | -0.059847879 | 0.256717817 | 0.333107592 |
| SYNGR3    | 0.059831831  | 0.256845613 | 0.333251702 |
| ZNF329    | 0.059821577  | 0.25692729  | 0.33333596  |
| CERKL     | 0.059816006  | 0.256971674 | 0.333371825 |
| NCRNA0023 | 0.059780125  | 0.257257663 | 0.333721102 |
| HLA-F     | 0.059775219  | 0.257296785 | 0.333750112 |
| SNORA71B  | -0.059751133 | 0.257488905 | 0.333977566 |
| C9orf117  | 0.059741612  | 0.257564875 | 0.334054346 |
| EEF1DP3   | 0.059738035  | 0.257593428 | 0.334069622 |
| POU2AF1   | 0.059734502  | 0.257621618 | 0.334084426 |
| TSNAX-DIS | -0.059723249 | 0.257711446 | 0.334168974 |
| CHADL     | 0.059722131  | 0.257720375 | 0.334168974 |
| HOMEZ     | 0.059717435  | 0.257757861 | 0.33419582  |
| ZNF101    | 0.059702829  | 0.2578745   | 0.334325283 |
| COQ7      | 0.059691362  | 0.257966098 | 0.334422266 |

|           |              |             |             |
|-----------|--------------|-------------|-------------|
| VAMP3     | -0.059666037 | 0.258168469 | 0.33466283  |
| CA8       | -0.059653111 | 0.2582718   | 0.334764104 |
| PF4       | -0.059652058 | 0.258280214 | 0.334764104 |
| TMED8     | -0.059637831 | 0.258393983 | 0.334889768 |
| WTIP      | -0.059622537 | 0.258516326 | 0.335020749 |
| SUSD3     | 0.059620991  | 0.258528691 | 0.335020749 |
| KNCN      | -0.059576052 | 0.25888841  | 0.335465072 |
| C2orf3    | 0.05954752   | 0.259116975 | 0.335739399 |
| ATP5A1    | -0.059540195 | 0.259175685 | 0.335793622 |
| TTYH1     | 0.059535144  | 0.259216163 | 0.335824218 |
| C7orf53   | -0.059532928 | 0.259233931 | 0.335825391 |
| LYRM2     | 0.059512498  | 0.259397723 | 0.336015718 |
| HABP2     | -0.059507898 | 0.259434615 | 0.33604165  |
| TCEAL3    | -0.059491299 | 0.259567765 | 0.336192251 |
| MID1      | 0.059422127  | 0.260123138 | 0.336889659 |
| PELI3     | 0.059382228  | 0.260443849 | 0.337261493 |
| MATK      | 0.059382195  | 0.260444113 | 0.337261493 |
| SYT1      | 0.05937602   | 0.260493778 | 0.337303874 |
| TRIM53    | 0.059365102  | 0.260581595 | 0.337395649 |
| C1orf144  | 0.059304227  | 0.261071626 | 0.338008155 |
| CYP2D6    | 0.059297462  | 0.261126119 | 0.338056728 |
| CHN2      | -0.059276192 | 0.261297509 | 0.338256624 |
| C3P1      | -0.059273603 | 0.261318374 | 0.338261646 |
| LOC728392 | 0.059268845  | 0.261356726 | 0.338289302 |
| ZDHHC6    | -0.059241326 | 0.261578626 | 0.338554516 |
| CXorf51   | 0.059237607  | 0.261608621 | 0.338571333 |
| C10orf81  | 0.059231659  | 0.261656606 | 0.33861143  |
| TMEM195   | -0.05922939  | 0.261674908 | 0.338613112 |
| SEH1L     | 0.059221041  | 0.26174227  | 0.338678273 |
| ALOXE3    | -0.059205879 | 0.261864634 | 0.338800759 |
| NCAPG2    | -0.059205096 | 0.261870955 | 0.338800759 |
| FCRL3     | -0.059202742 | 0.261889955 | 0.33880333  |
| OPN3      | 0.05919706   | 0.261935828 | 0.338840663 |
| DHX40P1   | 0.059179506  | 0.262077573 | 0.339002005 |
| CKAP2L    | 0.059173396  | 0.262126922 | 0.339043817 |
| KLHL14    | -0.0591636   | 0.262206058 | 0.339115028 |
| RASGRF1   | -0.059162365 | 0.262216034 | 0.339115028 |
| SCRT2     | 0.059152032  | 0.262299525 | 0.339200976 |
| GTF2H2    | -0.059105218 | 0.262678018 | 0.33966838  |
| ZDHHC9    | -0.059099834 | 0.262721572 | 0.339702643 |
| FBLIM1    | -0.059080008 | 0.262881997 | 0.339888006 |
| PRAMEF1   | -0.059060004 | 0.263043926 | 0.340051353 |
| PON2      | 0.059058779  | 0.263053843 | 0.340051353 |
| KRT23     | 0.059058073  | 0.26305956  | 0.340051353 |
| CA10      | -0.059050126 | 0.263123913 | 0.340112464 |
| DUOX1     | 0.059025084  | 0.263326768 | 0.340352582 |

|           |              |             |             |
|-----------|--------------|-------------|-------------|
| GSTTP1    | 0.059021618  | 0.263354856 | 0.340366796 |
| CALML5    | -0.059009612 | 0.263452154 | 0.340470451 |
| ANO9      | 0.058995198  | 0.263569005 | 0.34059936  |
| UTS2R     | -0.058989615 | 0.263614273 | 0.340635754 |
| KY        | -0.058966582 | 0.263801087 | 0.340855034 |
| DMRTC2    | 0.058952275  | 0.263917175 | 0.340982907 |
| SIGLEC11  | 0.058920174  | 0.264177773 | 0.34129746  |
| BET1L     | 0.058910275  | 0.264258168 | 0.341379179 |
| LOC729609 | 0.058878072  | 0.264519818 | 0.341695024 |
| WNK2      | 0.058863152  | 0.264641105 | 0.341829524 |
| SNORD94   | 0.058857231  | 0.264689251 | 0.341869539 |
| TSPAN32   | -0.058839374 | 0.264834486 | 0.342034941 |
| GRM7      | -0.058827738 | 0.264929144 | 0.342135005 |
| ADRB3     | -0.058821431 | 0.264980466 | 0.342179094 |
| SLA2      | -0.058796687 | 0.265181874 | 0.342416976 |
| OR52K1    | -0.058786788 | 0.265262484 | 0.342479339 |
| GSTA2     | 0.058786532  | 0.265264564 | 0.342479339 |
| MBOAT4    | -0.05877191  | 0.265383666 | 0.342610174 |
| SIX3      | 0.058769867  | 0.265400309 | 0.342610174 |
| EGR4      | -0.058764384 | 0.265444975 | 0.342645624 |
| SPAG17    | -0.058733304 | 0.265698282 | 0.342950372 |
| DNAJC25-G | -0.058717751 | 0.265825102 | 0.343079057 |
| TUSC5     | -0.058716852 | 0.265832434 | 0.343079057 |
| OR4D9     | -0.058702759 | 0.265947389 | 0.343205175 |
| NAP1L2    | -0.058692272 | 0.266032946 | 0.34329334  |
| SPG21     | -0.058663436 | 0.266268311 | 0.343574797 |
| OR5AN1    | 0.05863872   | 0.26647017  | 0.343812986 |
| ATP1A1    | -0.058635367 | 0.266497562 | 0.343826053 |
| LEPROTL1  | -0.058630742 | 0.266535341 | 0.343852517 |
| KRTAP19-4 | 0.058626205  | 0.266572412 | 0.343878066 |
| GC        | -0.058601634 | 0.26677324  | 0.344114843 |
| PPEF1     | 0.058584084  | 0.266916739 | 0.344277646 |
| LENEP     | -0.058565536 | 0.267068461 | 0.34443228  |
| C20orf118 | 0.0585652    | 0.267071216 | 0.34443228  |
| NACCC1    | -0.058532475 | 0.267339044 | 0.344755363 |
| OR4D6     | -0.058511041 | 0.267514569 | 0.344959378 |
| LRRIQ1    | 0.058475672  | 0.267804383 | 0.345310734 |
| DLGAP1    | -0.058457613 | 0.267952438 | 0.34547927  |
| TMEM132A  | 0.058453699  | 0.26798454  | 0.345498291 |
| FOXD4L1   | -0.058430987 | 0.268170832 | 0.345716088 |
| POTEC     | 0.058405637  | 0.268378881 | 0.345961902 |
| HCG2P7    | -0.058363576 | 0.26872431  | 0.346384766 |
| SNORA37   | 0.058340459  | 0.268914287 | 0.346607211 |
| ANGPTL4   | -0.058326293 | 0.269030755 | 0.346734887 |
| PDZK1     | 0.05832042   | 0.26907905  | 0.346770848 |
| LYPD3     | 0.058318665  | 0.269093481 | 0.346770848 |



|           |              |             |             |
|-----------|--------------|-------------|-------------|
| ODF3      | 0.058298802  | 0.269256864 | 0.346958941 |
| C12orf75  | 0.058292283  | 0.269310505 | 0.34700561  |
| SIT1      | 0.05828859   | 0.269340891 | 0.347022309 |
| SCGB1C1   | -0.058278558 | 0.269423457 | 0.347106232 |
| ANPEP     | -0.05826425  | 0.269541239 | 0.347235511 |
| REEP5     | 0.058254274  | 0.269623381 | 0.347299353 |
| CYB5A     | -0.058253996 | 0.269625674 | 0.347299353 |
| RPTOR     | -0.058251858 | 0.26964328  | 0.347299569 |
| CTRC      | 0.058246576  | 0.269686783 | 0.347333136 |
| NUDT19    | 0.058224037  | 0.269872467 | 0.347549805 |
| ITIH2     | -0.05821853  | 0.269917847 | 0.347585769 |
| NDUFS2    | 0.058192323  | 0.270133883 | 0.347841476 |
| SPINK8    | -0.058180998 | 0.270227276 | 0.347939239 |
| C1orf84   | -0.058139908 | 0.270566315 | 0.348353256 |
| SEMG2     | -0.058123012 | 0.270705803 | 0.348484337 |
| RGS8      | -0.0581224   | 0.270710864 | 0.348484337 |
| RRAD      | -0.058121218 | 0.270720622 | 0.348484337 |
| ANXA8L1   | -0.058098126 | 0.270911359 | 0.348707324 |
| LOC441177 | -0.058086085 | 0.271010855 | 0.348812846 |
| ZNF300    | 0.058078993  | 0.271069462 | 0.348865733 |
| BHMT2     | -0.058075037 | 0.271102163 | 0.348885272 |
| C12orf4   | 0.058033064  | 0.271449256 | 0.349309377 |
| DMRTA1    | -0.058026683 | 0.271502051 | 0.349354742 |
| FOXD4     | -0.057991421 | 0.271793915 | 0.349707703 |
| C12orf26  | 0.057986489  | 0.271834756 | 0.349737656 |
| LRRIQ3    | -0.057981091 | 0.271879462 | 0.349772577 |
| C11orf88  | -0.057950858 | 0.272129926 | 0.350064352 |
| ACTL9     | -0.057949472 | 0.272141416 | 0.350064352 |
| TEKT2     | 0.057938999  | 0.272228216 | 0.350153388 |
| LOC284379 | 0.057931639  | 0.272289226 | 0.350209244 |
| KCNMB4    | 0.057921525  | 0.272373084 | 0.350294477 |
| PAR-SN    | -0.057908857 | 0.272478148 | 0.350392309 |
| NCR3      | 0.05790811   | 0.272484343 | 0.350392309 |
| HDAC7     | -0.057850625 | 0.272961436 | 0.350972639 |
| SLC2A1    | 0.057849487  | 0.272970887 | 0.350972639 |
| POM121C   | -0.057817252 | 0.273238679 | 0.351294273 |
| DPPA5     | 0.057789361  | 0.273470524 | 0.351569653 |
| ESD       | 0.05778581   | 0.273500046 | 0.35158491  |
| PLLP      | 0.057770866  | 0.27362434  | 0.351721986 |
| CLCA2     | -0.057768042 | 0.273647829 | 0.351729477 |
| C16orf78  | -0.057745391 | 0.273836294 | 0.351949003 |
| IL1RL2    | -0.057724917 | 0.274006728 | 0.352145327 |
| OR9Q1     | -0.057722172 | 0.274029586 | 0.352151979 |
| PRPF18    | 0.057718887  | 0.274056941 | 0.352164407 |
| PON3      | -0.057690452 | 0.274293792 | 0.35244602  |
| DNA2      | -0.05768781  | 0.2743158   | 0.352451559 |

|           |              |             |             |
|-----------|--------------|-------------|-------------|
| CA11      | 0.05768568   | 0.274333546 | 0.352451621 |
| ITGAX     | -0.057620319 | 0.274878557 | 0.353129046 |
| C2CD4A    | -0.057607275 | 0.274987411 | 0.353246101 |
| NUP188    | -0.057575001 | 0.27525687  | 0.35355163  |
| EPS15L1   | -0.057574535 | 0.27526076  | 0.35355163  |
| USP37     | -0.057516236 | 0.275747962 | 0.354148831 |
| RAB17     | 0.057514644  | 0.275761281 | 0.354148831 |
| DEXI      | 0.057511765  | 0.275785354 | 0.354156315 |
| ABP1      | -0.057509694 | 0.275802676 | 0.354156315 |
| TAF7      | 0.057504687  | 0.275844546 | 0.354187243 |
| HERC2P4   | 0.057500192  | 0.275882148 | 0.354212686 |
| SEZ6      | -0.05749694  | 0.275909354 | 0.35422478  |
| C2orf80   | 0.057477594  | 0.276071222 | 0.354409745 |
| RARRES1   | -0.057457503 | 0.276239384 | 0.354602768 |
| ERCC8     | -0.057397182 | 0.276744714 | 0.355228552 |
| ENPP2     | -0.057343942 | 0.277191245 | 0.355778786 |
| KIAA0319L | -0.057324699 | 0.277352751 | 0.35596314  |
| PPIL3     | 0.057311317  | 0.277465116 | 0.356084404 |
| IFRD1     | 0.057305049  | 0.277517753 | 0.356129006 |
| NCF1B     | -0.057295723 | 0.277596078 | 0.356206565 |
| NECAB1    | 0.057276187  | 0.277760217 | 0.356394223 |
| MSH4      | -0.05727318  | 0.277785485 | 0.356403681 |
| TACR3     | 0.057258946  | 0.277905126 | 0.356534213 |
| SLC25A41  | 0.057251753  | 0.277965596 | 0.35658882  |
| CRCT1     | -0.057235778 | 0.278099931 | 0.356738172 |
| RASSF9    | -0.05722355  | 0.278202781 | 0.35684712  |
| C1QL1     | -0.057217038 | 0.278257563 | 0.356894401 |
| FARP1     | -0.057208756 | 0.278327251 | 0.356960793 |
| GPAT2     | 0.057198046  | 0.278417389 | 0.357053403 |
| DMPK      | -0.057093665 | 0.279296886 | 0.358158241 |
| TMEM92    | 0.05708645   | 0.279357749 | 0.358213224 |
| ZNF540    | -0.05707636  | 0.279442875 | 0.358278256 |
| COLEC11   | -0.057076174 | 0.279444447 | 0.358278256 |
| GATS      | -0.05707354  | 0.279466666 | 0.358283678 |
| C3AR1     | -0.057062734 | 0.279557865 | 0.358377527 |
| GRIN2C    | -0.057046723 | 0.279693024 | 0.358527668 |
| MGAT4B    | -0.057044595 | 0.279710991 | 0.358527668 |
| ADAMTS20  | 0.057041136  | 0.279740197 | 0.358536804 |
| LCNL1     | -0.057039486 | 0.279754125 | 0.358536804 |
| TAS2R9    | -0.05703477  | 0.279793952 | 0.358564772 |
| TMEM121   | -0.057028733 | 0.279844937 | 0.35859575  |
| CEACAM5   | -0.057027644 | 0.279854138 | 0.35859575  |
| SELENBP1  | -0.057004961 | 0.280045769 | 0.358818213 |
| C17orf80  | 0.057001506  | 0.280074958 | 0.358832527 |
| NAALAD2   | -0.056973167 | 0.280314516 | 0.359116346 |
| NUP62CL   | 0.056968783  | 0.280351585 | 0.359140732 |

|           |              |             |             |
|-----------|--------------|-------------|-------------|
| GRK7      | -0.056953357 | 0.280482056 | 0.359284759 |
| ZMYM3     | 0.056945607  | 0.280547616 | 0.359345624 |
| DLEU2     | 0.056931712  | 0.280665192 | 0.359461095 |
| PLSCR2    | 0.056930687  | 0.280673865 | 0.359461095 |
| HPN       | 0.056927141  | 0.280703878 | 0.359476415 |
| NDUFA5    | -0.056915998 | 0.280798193 | 0.359574075 |
| DOK1      | 0.056908956  | 0.280857811 | 0.359627294 |
| NRXN1     | -0.056902731 | 0.280910522 | 0.359671663 |
| GFI1B     | -0.056871928 | 0.281171435 | 0.359982587 |
| CALHM3    | 0.056838382  | 0.281455776 | 0.360323462 |
| BDH1      | -0.056813591 | 0.281666029 | 0.360535532 |
| CST11     | 0.056812905  | 0.281671846 | 0.360535532 |
| SLC36A2   | 0.056812446  | 0.281675739 | 0.360535532 |
| KIAA1143  | -0.056808352 | 0.281710468 | 0.36055681  |
| SFXN2     | 0.056778729  | 0.281961875 | 0.360855391 |
| USP9Y     | -0.056765898 | 0.282070809 | 0.360971608 |
| TFAP2D    | 0.056750944  | 0.282197806 | 0.361110924 |
| MGC4473   | 0.056747181  | 0.282229775 | 0.361128629 |
| OOEP      | 0.056731315  | 0.282364568 | 0.361277891 |
| DSC1      | -0.056709546 | 0.282549589 | 0.361491396 |
| LOC121952 | -0.056688727 | 0.282726616 | 0.361694646 |
| HESRG     | 0.056676858  | 0.28282757  | 0.36179102  |
| NSUN4     | 0.056675598  | 0.282838282 | 0.36179102  |
| PRB4      | -0.056666931 | 0.282912025 | 0.361862105 |
| GPR87     | -0.05665716  | 0.282995162 | 0.361945197 |
| HLA-DQA2  | -0.056645041 | 0.283098318 | 0.362053879 |
| OR6T1     | -0.056640106 | 0.283140326 | 0.362084351 |
| PDK2      | -0.056617541 | 0.283332466 | 0.362306797 |
| ELOVL2    | 0.056610713  | 0.283390621 | 0.362357895 |
| SOD2      | -0.056593131 | 0.283540414 | 0.362526152 |
| DAD1L     | 0.05658188   | 0.283636297 | 0.362625465 |
| CLCF1     | -0.05657907  | 0.283660251 | 0.362632809 |
| PALM3     | 0.056563456  | 0.283793358 | 0.362760121 |
| DDX52     | 0.056563115  | 0.283796269 | 0.362760121 |
| MAGEB16   | 0.05652045   | 0.284160207 | 0.363202011 |
| OR52H1    | -0.0565051   | 0.28429122  | 0.363346146 |
| KDM1B     | -0.056485331 | 0.284460013 | 0.363538545 |
| WDR81     | -0.056476844 | 0.284532491 | 0.363607839 |
| IL2RG     | 0.056468604  | 0.284602874 | 0.363674446 |
| FBXO5     | -0.056464318 | 0.284639494 | 0.363697904 |
| SERPINA10 | -0.056448958 | 0.284770745 | 0.363842265 |
| TFB1M     | 0.056434116  | 0.284897606 | 0.363981    |
| RIMKLA    | -0.056392503 | 0.285253493 | 0.364412298 |
| NCRNA0020 | 0.056365247  | 0.285486754 | 0.364686896 |
| PRAMEF5   | -0.056341744 | 0.285688003 | 0.364920568 |
| OR13C4    | 0.056337842  | 0.285721417 | 0.364939842 |

|           |              |             |             |
|-----------|--------------|-------------|-------------|
| KDELC1    | -0.056308678 | 0.285971292 | 0.365235572 |
| ST18      | 0.056272923  | 0.286277834 | 0.365603633 |
| LOC554202 | -0.056270459 | 0.286298972 | 0.365607184 |
| C2orf14   | 0.05626097   | 0.286380364 | 0.365677034 |
| ARL5C     | -0.056259801 | 0.286390394 | 0.365677034 |
| CXCR4     | -0.056231953 | 0.286629359 | 0.365958693 |
| FAM90A7   | -0.056213829 | 0.286784963 | 0.366126795 |
| CELA3A    | 0.056212335  | 0.286797791 | 0.366126795 |
| IL11      | -0.056208951 | 0.286826847 | 0.366140418 |
| LOC728606 | -0.056194183 | 0.286953692 | 0.366278861 |
| ZFAT      | -0.05618597  | 0.287024245 | 0.366342596 |
| PRUNE     | 0.056184088  | 0.287040415 | 0.366342596 |
| CASP9     | -0.056135186 | 0.287460781 | 0.366855589 |
| KRT83     | -0.056115267 | 0.287632132 | 0.367050744 |
| DCAF8L2   | 0.056106622  | 0.287706515 | 0.36712214  |
| THTPA     | 0.056080229  | 0.287933692 | 0.367388486 |
| C9orf30   | 0.05607042   | 0.288018158 | 0.367472715 |
| GYS1      | 0.05602269   | 0.288429383 | 0.36797381  |
| TRIM45    | 0.056000656  | 0.288619356 | 0.368192587 |
| ZNF568    | -0.055998248 | 0.288640122 | 0.368195492 |
| TDRG1     | -0.055983038 | 0.288771316 | 0.368339253 |
| POLR2J2   | 0.055973025  | 0.288857702 | 0.368425844 |
| CNTFR     | -0.055968451 | 0.288897167 | 0.368429461 |
| ZNF2      | -0.055968408 | 0.288897538 | 0.368429461 |
| PDXP      | 0.055930022  | 0.289228905 | 0.368828433 |
| PPCS      | 0.055919458  | 0.289320147 | 0.368909912 |
| CMBL      | -0.055916268 | 0.289347699 | 0.368909912 |
| HIST1H3E  | -0.05591619  | 0.289348372 | 0.368909912 |
| MFAP2     | 0.05586852   | 0.289760353 | 0.369411524 |
| MGC29506  | 0.055856984  | 0.289860115 | 0.369515055 |
| CP        | -0.055842432 | 0.289985985 | 0.369651852 |
| PAX4      | 0.055811737  | 0.290251609 | 0.369966769 |
| SPOCK3    | -0.055808283 | 0.29028151  | 0.369981202 |
| SNORA16B  | -0.055799561 | 0.290357019 | 0.370053758 |
| LOC286094 | -0.055737308 | 0.290896366 | 0.370717421 |
| GLB1L2    | -0.055719514 | 0.291050652 | 0.370890308 |
| UBAP2     | -0.05571222  | 0.291113908 | 0.37094718  |
| OR2B11    | -0.055685087 | 0.291349317 | 0.371223394 |
| PTGR1     | 0.055678782  | 0.291404037 | 0.371269363 |
| ZNF155    | 0.055673063  | 0.291453675 | 0.37130885  |
| C2orf71   | -0.05565567  | 0.291604677 | 0.37147746  |
| OR6C3     | 0.055653079  | 0.291627172 | 0.371482354 |
| WFIKKN2   | 0.055637817  | 0.291759724 | 0.371627433 |
| C9orf152  | 0.055633071  | 0.291800957 | 0.371656181 |
| UGT1A8    | -0.055623444 | 0.29188459  | 0.371738928 |
| CABP5     | -0.05561264  | 0.29197848  | 0.371834725 |

|           |              |             |             |
|-----------|--------------|-------------|-------------|
| MCART3P   | -0.055609877 | 0.292002494 | 0.371841529 |
| ZNF256    | 0.055585894  | 0.292210984 | 0.372083232 |
| NGLY1     | 0.055582539  | 0.292240155 | 0.372096586 |
| ZNF418    | 0.055574709  | 0.292308252 | 0.372159496 |
| ZFP2      | -0.055556221 | 0.292469074 | 0.372333023 |
| SPACA1    | -0.055554743 | 0.292481939 | 0.372333023 |
| IQCE      | -0.055533937 | 0.292663004 | 0.372539708 |
| MPZL1     | 0.055476042  | 0.293167234 | 0.373157706 |
| CLDN9     | 0.05546277   | 0.293282908 | 0.373281084 |
| HMHA1     | 0.055457642  | 0.293327611 | 0.373314121 |
| DNAJC18   | -0.055423604 | 0.29362444  | 0.373668012 |
| OR1L3     | -0.055411491 | 0.293730121 | 0.373778617 |
| HLA-B     | 0.055371649  | 0.294077901 | 0.374197266 |
| GRM5      | -0.055366386 | 0.294123857 | 0.37423183  |
| CCDC11    | 0.055356981  | 0.294206001 | 0.374312433 |
| COMMD8    | 0.055339329  | 0.294360218 | 0.374484715 |
| PHEX      | -0.055325928 | 0.294477339 | 0.374609786 |
| VTA1      | -0.055312518 | 0.294594558 | 0.374734965 |
| BSPRY     | 0.055298363  | 0.294718335 | 0.374868471 |
| MUC17     | -0.055285611 | 0.294829864 | 0.37498638  |
| GOLGA8B   | 0.055264039  | 0.295018604 | 0.375202471 |
| KCNH7     | 0.055260133  | 0.295052786 | 0.375221981 |
| ATP12A    | -0.055252564 | 0.295119035 | 0.375282267 |
| MORN5     | 0.055249758  | 0.295143593 | 0.375289532 |
| PCDHA6    | -0.055235592 | 0.295267618 | 0.375423266 |
| AMH       | -0.055233178 | 0.295288751 | 0.375426167 |
| AGAP7     | 0.055218982  | 0.295413073 | 0.375560252 |
| TNFSF12   | 0.05518144   | 0.295742022 | 0.375954448 |
| MPP3      | 0.055173701  | 0.295809862 | 0.376016685 |
| C21orf71  | 0.055159362  | 0.29593559  | 0.376152493 |
| PLEKHN1   | -0.055150128 | 0.296016571 | 0.376231413 |
| ADIPOQ    | -0.055142336 | 0.296084923 | 0.376294272 |
| 44077     | -0.055136704 | 0.296134331 | 0.376333048 |
| LCE2B     | -0.055118176 | 0.296296907 | 0.376506823 |
| CBWD5     | -0.055116811 | 0.296308885 | 0.376506823 |
| ADAM6     | -0.055096502 | 0.296487167 | 0.376709324 |
| LRSAM1    | -0.055085671 | 0.296582274 | 0.376806124 |
| RAB20     | -0.055062024 | 0.296789987 | 0.377045967 |
| SPRR2A    | -0.055051131 | 0.296885708 | 0.377143514 |
| GPR61     | -0.055043058 | 0.296956656 | 0.377187549 |
| LOC283050 | 0.055041235  | 0.296972679 | 0.377187549 |
| CTSL1     | 0.055039641  | 0.296986692 | 0.377187549 |
| RIMBP3C   | 0.055038567  | 0.296996132 | 0.377187549 |
| SLCO4C1   | -0.055027668 | 0.29709195  | 0.37728518  |
| C2orf52   | 0.05501985   | 0.297160686 | 0.377348407 |
| GPSM3     | 0.055011086  | 0.297237764 | 0.377422218 |

|          |              |             |             |
|----------|--------------|-------------|-------------|
| RBMY2EP  | 0.055008758  | 0.297258238 | 0.377424151 |
| WDR38    | 0.054996726  | 0.297364073 | 0.377532205 |
| SLC19A1  | 0.054994773  | 0.297381256 | 0.377532205 |
| MGC2752  | -0.054977794 | 0.297530657 | 0.377697797 |
| H2BFM    | 0.054972825  | 0.297574393 | 0.377729239 |
| CLEC6A   | -0.054966314 | 0.297631703 | 0.377777907 |
| ZBTB8B   | 0.054961568  | 0.29767348  | 0.377806855 |
| ITIH5L   | 0.054959051  | 0.297695643 | 0.377810906 |
| PFN3     | 0.054955739  | 0.297724803 | 0.377823835 |
| RAB40A   | 0.054948698  | 0.297786795 | 0.377878426 |
| ARHGEF19 | 0.054941771  | 0.297847797 | 0.377915619 |
| TTY20    | 0.05494106   | 0.297854058 | 0.377915619 |
| MFSD6L   | -0.054924567 | 0.297999339 | 0.378075863 |
| CT47A10  | -0.054919583 | 0.298043244 | 0.378107479 |
| SIGMAR1  | 0.054900556  | 0.298210919 | 0.378296098 |
| TTY4C    | -0.054893553 | 0.298272651 | 0.378350309 |
| FOLH1B   | -0.054886168 | 0.298337759 | 0.378408794 |
| OR1D4    | -0.054812145 | 0.29899086  | 0.379213029 |
| SMARCA4  | 0.054808745  | 0.299020878 | 0.37922695  |
| RELL1    | -0.054801918 | 0.299081167 | 0.379279256 |
| TMEM146  | 0.054775267  | 0.299316592 | 0.379553641 |
| HSPB2    | -0.054752528 | 0.299517545 | 0.379784281 |
| ANXA5    | -0.054736976 | 0.299655048 | 0.379934442 |
| NMT2     | -0.054728149 | 0.299733102 | 0.380009214 |
| SCARA3   | 0.054723125  | 0.299777537 | 0.380041063 |
| UNC50    | -0.054720994 | 0.29979639  | 0.380041063 |
| PLXNB1   | 0.054716214  | 0.299838667 | 0.380057936 |
| ZNF577   | 0.054715174  | 0.299847868 | 0.380057936 |
| TAS2R46  | -0.054699131 | 0.299989808 | 0.380213646 |
| ECEL1    | 0.054696393  | 0.300014038 | 0.380219007 |
| ANKDD1A  | 0.054694339  | 0.300032222 | 0.380219007 |
| SERPIND1 | 0.054686888  | 0.300098158 | 0.380278367 |
| TMC1     | -0.054662125 | 0.300317396 | 0.380531967 |
| H3F3C    | -0.05465615  | 0.300370308 | 0.380574799 |
| MYH14    | 0.054622595  | 0.30066758  | 0.380927213 |
| FOXI3    | -0.054612727 | 0.300755044 | 0.381013785 |
| TUBG2    | 0.054605046  | 0.300823132 | 0.381075802 |
| PKD1L2   | -0.054566316 | 0.301166619 | 0.381486657 |
| EXTL1    | -0.054559907 | 0.301223477 | 0.381534411 |
| GYPC     | 0.054540315  | 0.301397359 | 0.381730374 |
| GK       | -0.054534028 | 0.301453171 | 0.381776782 |
| CD14     | -0.05453117  | 0.301478536 | 0.381784627 |
| AGPAT4   | 0.054508215  | 0.301682386 | 0.382018485 |
| RSPH10B2 | -0.054499033 | 0.301763948 | 0.382097471 |
| BCL2L14  | 0.054426275  | 0.302410762 | 0.382892131 |
| ZNF398   | -0.05441006  | 0.302555039 | 0.383050452 |

|           |              |             |             |
|-----------|--------------|-------------|-------------|
| CNNM1     | 0.054398118  | 0.302661317 | 0.383160647 |
| ACTN2     | 0.054392     | 0.302715784 | 0.383205241 |
| ITLN2     | 0.054358249  | 0.303016339 | 0.383561329 |
| SSBP3     | -0.054345389 | 0.303130911 | 0.383681969 |
| OR8I2     | -0.054336719 | 0.30320817  | 0.383755367 |
| LCN6      | -0.054316101 | 0.303391951 | 0.383963567 |
| C20orf203 | -0.054308573 | 0.303459069 | 0.384024106 |
| ECHDC3    | 0.054296699  | 0.303564958 | 0.384123832 |
| ITGA2B    | -0.054295411 | 0.303576449 | 0.384123832 |
| ISCA1P1   | 0.054282762  | 0.303689276 | 0.384242181 |
| ZNF211    | -0.054269134 | 0.303810873 | 0.384371611 |
| GLIS1     | -0.054264758 | 0.303849922 | 0.384396595 |
| SPRR1B    | -0.054244757 | 0.304028455 | 0.38457859  |
| ROGDI     | 0.054244314  | 0.304032404 | 0.38457859  |
| CTSH      | -0.054240983 | 0.304062149 | 0.384591788 |
| FBXL12    | -0.054228658 | 0.304172204 | 0.384686827 |
| HSPC072   | 0.054226412  | 0.304192258 | 0.384686827 |
| C11orf1   | 0.054226079  | 0.304195237 | 0.384686827 |
| DNAH17    | 0.054205139  | 0.304382289 | 0.384898932 |
| TAC4      | -0.054189218 | 0.304524559 | 0.385054387 |
| SLC5A10   | -0.054183661 | 0.304574228 | 0.38509274  |
| FXYD5     | 0.054181474  | 0.30459377  | 0.385093    |
| OBP2B     | -0.054170981 | 0.304687574 | 0.385187142 |
| NRBP2     | -0.054153107 | 0.304847411 | 0.385364745 |
| PACS2     | 0.054142364  | 0.304943501 | 0.385461747 |
| GPR84     | 0.054139162  | 0.304972147 | 0.38547349  |
| VENTXP7   | 0.054136904  | 0.304992347 | 0.385474557 |
| ACP5      | 0.054128599  | 0.305066649 | 0.385543997 |
| ELAVL2    | -0.054052722 | 0.305746087 | 0.386378154 |
| OXTR      | -0.054005277 | 0.306171443 | 0.386891135 |
| NEK8      | -0.053990364 | 0.306305219 | 0.387035622 |
| PAK6      | 0.053956096  | 0.30661277  | 0.387399652 |
| KCNQ1OT1  | -0.053950672 | 0.306661463 | 0.387436594 |
| C4orf17   | 0.053918976  | 0.30694614  | 0.387771655 |
| LOC100286 | -0.053897511 | 0.307139029 | 0.387990724 |
| ORMDL3    | 0.053883524  | 0.307264764 | 0.388115392 |
| ENPP7     | 0.053882197  | 0.307276695 | 0.388115392 |
| NCRNA0003 | -0.053853737 | 0.307532638 | 0.388414033 |
| SOX9      | 0.053850628  | 0.307560605 | 0.388424723 |
| CD300C    | -0.053837219 | 0.307681245 | 0.388552442 |
| RPUSD4    | 0.053806926  | 0.307953917 | 0.388872124 |
| FBXO41    | -0.053801772 | 0.30800032  | 0.38890606  |
| SLC25A22  | 0.053791251  | 0.308095069 | 0.389001033 |
| PLBD1     | 0.053786887  | 0.308134374 | 0.389025995 |
| LECT1     | 0.053776395  | 0.30822889  | 0.389120656 |
| CR2       | -0.05377279  | 0.308261368 | 0.389136989 |

|           |              |             |             |
|-----------|--------------|-------------|-------------|
| ARMC10    | 0.053769542  | 0.308290633 | 0.389149265 |
| SFRS2     | -0.053716413 | 0.308769573 | 0.389724854 |
| C11orf71  | -0.053714619 | 0.308785763 | 0.389724854 |
| CD3EAP    | 0.053699356  | 0.308923451 | 0.3898706   |
| ALDH4A1   | -0.053697006 | 0.308944649 | 0.3898706   |
| HLF       | -0.053695308 | 0.30895997  | 0.3898706   |
| ACOX3     | -0.05369223  | 0.308987743 | 0.389880941 |
| CHRN3     | -0.053671183 | 0.309177702 | 0.390095916 |
| ZIC1      | 0.053664473  | 0.309238274 | 0.390147623 |
| EAPP      | 0.053656049  | 0.309314339 | 0.390218869 |
| ETF1      | -0.053646875 | 0.309397185 | 0.390298659 |
| DEFB123   | 0.053623507  | 0.309608285 | 0.39054022  |
| KLHL22    | 0.053576157  | 0.310036308 | 0.391035501 |
| STOML3    | 0.053575727  | 0.310040199 | 0.391035501 |
| SLC9A10   | -0.053570003 | 0.310091966 | 0.391053846 |
| LINGO1    | -0.053567938 | 0.310110638 | 0.391053846 |
| AFF3      | -0.053567605 | 0.310113653 | 0.391053846 |
| FCRL4     | 0.053559944  | 0.310182954 | 0.391112515 |
| BRS3      | 0.05355812   | 0.310199456 | 0.391112515 |
| RNLS      | -0.053546649 | 0.310303244 | 0.391218606 |
| PRX       | 0.053539322  | 0.310369545 | 0.391273362 |
| CD37      | -0.053536801 | 0.310392366 | 0.391273362 |
| C1orf162  | 0.053535337  | 0.310405616 | 0.391273362 |
| NOL3      | 0.05352422   | 0.310506246 | 0.391375436 |
| MEST      | -0.053470689 | 0.310991089 | 0.391961745 |
| C5orf33   | -0.053445389 | 0.311220419 | 0.392225962 |
| DUOXA1    | -0.053441982 | 0.311251304 | 0.392240063 |
| OR2J2     | -0.053438112 | 0.311286399 | 0.392259469 |
| MUC4      | -0.053398955 | 0.311641592 | 0.392682209 |
| FCRL2     | -0.053393177 | 0.311694032 | 0.392723437 |
| BMP15     | 0.053388635  | 0.311735248 | 0.39275052  |
| HIST1H1T  | -0.053380914 | 0.311805338 | 0.392813974 |
| AWAT2     | -0.053328497 | 0.312281388 | 0.393388819 |
| KRT76     | -0.053321901 | 0.312341331 | 0.393439443 |
| ORC3L     | -0.053314461 | 0.312408945 | 0.393499724 |
| VAT1L     | -0.053305169 | 0.312493416 | 0.393581228 |
| LOC100130 | 0.053300249  | 0.312538141 | 0.393612665 |
| SERPINA6  | 0.053283848  | 0.312687273 | 0.393775581 |
| BEST2     | -0.053274969 | 0.312768032 | 0.393852378 |
| PIP4K2B   | 0.053272747  | 0.312788244 | 0.393852927 |
| KLHL13    | -0.053258866 | 0.312914523 | 0.393987021 |
| CYP4F8    | -0.053213317 | 0.313329148 | 0.394484131 |
| LOC340074 | -0.053207431 | 0.31338275  | 0.394526674 |
| FAM151A   | -0.05315804  | 0.313832796 | 0.395068277 |
| TIMP4     | -0.053152528 | 0.313883049 | 0.395106562 |
| GPR78     | -0.053142759 | 0.313972127 | 0.395175974 |



|           |              |             |             |
|-----------|--------------|-------------|-------------|
| LILRB2    | -0.053142128 | 0.313977878 | 0.395175974 |
| ZNF705D   | -0.05313605  | 0.314033311 | 0.395220765 |
| LAPTM5    | 0.053129886  | 0.314089529 | 0.395266538 |
| OR13D1    | -0.053124311 | 0.314140375 | 0.395291903 |
| CCDC13    | 0.053123324  | 0.314149382 | 0.395291903 |
| SLC13A4   | -0.053107677 | 0.314292142 | 0.395446551 |
| CTDP1     | 0.053098468  | 0.314376177 | 0.395527296 |
| TM4SF4    | -0.053063312 | 0.314697141 | 0.3959061   |
| NMI       | 0.0530586    | 0.314740174 | 0.395935226 |
| CORO1A    | 0.053043108  | 0.314881692 | 0.396088232 |
| TMPRSS6   | -0.053036322 | 0.314943696 | 0.396141206 |
| RPE65     | -0.053032337 | 0.31498011  | 0.396156554 |
| LETM1     | 0.053030633  | 0.314995684 | 0.396156554 |
| SIX4      | 0.053027822  | 0.315021371 | 0.396163842 |
| KRT3      | -0.053020914 | 0.315084502 | 0.396218214 |
| PLCD3     | -0.052999701 | 0.315278428 | 0.396416372 |
| HMX1      | -0.052999322 | 0.315281894 | 0.396416372 |
| C7orf71   | 0.052996148  | 0.315310917 | 0.396427836 |
| IBSP      | 0.052974803  | 0.315506143 | 0.396648244 |
| FRG2      | -0.05295439  | 0.315692919 | 0.396858003 |
| IL22RA2   | -0.05293146  | 0.315902816 | 0.397096798 |
| CDH16     | 0.052925567  | 0.315956765 | 0.397139547 |
| BRF1      | 0.05292095   | 0.315999045 | 0.397167623 |
| FSCB      | 0.052902642  | 0.316166726 | 0.397353297 |
| NOXA1     | 0.052892088  | 0.316263415 | 0.397449733 |
| MICAL1    | 0.052886222  | 0.316317172 | 0.397492205 |
| CTSB      | -0.052872439 | 0.316443482 | 0.39762584  |
| COX10     | -0.052850021 | 0.31664901  | 0.397858993 |
| ZNF555    | -0.052815893 | 0.316962053 | 0.398227196 |
| ZBTB24    | -0.052782749 | 0.317266264 | 0.398584257 |
| FAM21C    | 0.052773004  | 0.317355744 | 0.398671522 |
| ADIPOR1   | -0.052749802 | 0.317568854 | 0.398914074 |
| SCGBL     | -0.052747402 | 0.317590902 | 0.398916608 |
| VCAM1     | -0.05273128  | 0.317739052 | 0.39907438  |
| B3GNT9    | -0.052727272 | 0.317775884 | 0.39907438  |
| LOC348021 | 0.052727191  | 0.317776626 | 0.39907438  |
| PPIL2     | -0.052695485 | 0.318068128 | 0.39941527  |
| QRICH1    | -0.052658803 | 0.31840559  | 0.39979998  |
| C19orf12  | -0.05265782  | 0.318414636 | 0.39979998  |
| TARSL2    | -0.052591883 | 0.319021828 | 0.400537114 |
| GJD4      | 0.052581962  | 0.319113259 | 0.400626651 |
| RAVER2    | -0.052561641 | 0.319300571 | 0.40083654  |
| GSTA5     | 0.05255854   | 0.319329164 | 0.400841579 |
| CCDC90B   | 0.05255684   | 0.319344841 | 0.400841579 |
| RHOXF1    | 0.052548428  | 0.319422412 | 0.400913678 |
| PRAMEF20  | -0.052506307 | 0.319811005 | 0.401376113 |

|           |              |             |             |
|-----------|--------------|-------------|-------------|
| FAM174B   | -0.052493657 | 0.319927765 | 0.40149735  |
| TTF1      | -0.052490495 | 0.319956962 | 0.401508689 |
| PARP2     | 0.052466995  | 0.32017396  | 0.401755682 |
| ANKRD13B  | 0.05245093   | 0.320322358 | 0.401916567 |
| ACADVL    | -0.052429276 | 0.320522463 | 0.402142307 |
| DPP7      | -0.052415483 | 0.320649959 | 0.402276927 |
| B4GALT4   | -0.05240909  | 0.320709073 | 0.402325744 |
| KCNA6     | -0.052394316 | 0.32084569  | 0.402471776 |
| TMED10P1  | -0.05236786  | 0.321090437 | 0.402753421 |
| RASL12    | -0.052328938 | 0.321450731 | 0.403179954 |
| SYN1      | -0.052288183 | 0.321828268 | 0.403623983 |
| MYBPH     | -0.052286347 | 0.321845285 | 0.403623983 |
| MORF4     | -0.052196581 | 0.322677888 | 0.404642664 |
| C14orf102 | -0.052184001 | 0.322794682 | 0.404763638 |
| PDE6A     | 0.052180515  | 0.322827046 | 0.404778734 |
| COL4A5    | -0.052150263 | 0.32310804  | 0.405105554 |
| GLDN      | 0.052144989  | 0.323157048 | 0.405141493 |
| HHLA2     | 0.052131422  | 0.323283123 | 0.405274039 |
| ABCA3     | -0.052116051 | 0.323426007 | 0.405427641 |
| OR10Q1    | -0.052057653 | 0.323969236 | 0.40608304  |
| MAP1LC3B  | -0.052037413 | 0.324157644 | 0.406293629 |
| GZMK      | -0.052034383 | 0.32418586  | 0.406303424 |
| NUP88     | 0.052023489  | 0.324287303 | 0.406404986 |
| LOC257358 | -0.052010104 | 0.324411978 | 0.40653565  |
| PLB1      | -0.052005826 | 0.324451831 | 0.406560009 |
| ZNF673    | -0.051999391 | 0.324511778 | 0.406609542 |
| OR5C1     | 0.051976857  | 0.324721782 | 0.406847077 |
| CPB2      | -0.051966707 | 0.324816394 | 0.406940016 |
| IFT46     | -0.051963824 | 0.324843273 | 0.40694809  |
| C14orf183 | -0.051913702 | 0.3253108   | 0.407508151 |
| FAM156A   | -0.051897797 | 0.325459249 | 0.407668467 |
| MS4A3     | -0.051881727 | 0.325609287 | 0.407830751 |
| TRPM4     | -0.051850487 | 0.325901079 | 0.408170554 |
| IL18RAP   | -0.051833259 | 0.326062067 | 0.408346502 |
| LOC283867 | 0.051819582  | 0.326189906 | 0.408480915 |
| RFXAP     | -0.051815407 | 0.326228938 | 0.408504106 |
| CHD3      | -0.051785689 | 0.32650685  | 0.408826402 |
| TTY2      | 0.051762302  | 0.326725666 | 0.409074666 |
| SHROOM1   | 0.051751025  | 0.326831214 | 0.409181092 |
| TBR1      | -0.051732908 | 0.327000825 | 0.409367704 |
| S100G     | 0.051724949  | 0.327075358 | 0.409435273 |
| HRNBP3    | 0.051687173  | 0.327429245 | 0.409852509 |
| MRPL42P5  | -0.051669583 | 0.327594111 | 0.410033104 |
| HOXC6     | 0.051665737  | 0.327630168 | 0.410045263 |
| CPSF4L    | 0.051662613  | 0.327659458 | 0.410045263 |
| TRIM72    | -0.051661958 | 0.327665594 | 0.410045263 |

|           |              |             |             |
|-----------|--------------|-------------|-------------|
| YWHAB     | 0.051642111  | 0.327851715 | 0.410252398 |
| ACTR10    | -0.051631589 | 0.327950407 | 0.41035011  |
| OR52I1    | -0.051626635 | 0.327996885 | 0.410382482 |
| CBWD3     | 0.051615194  | 0.328104235 | 0.410491006 |
| PKIA      | 0.051612023  | 0.328133996 | 0.410502452 |
| SCML4     | -0.051601384 | 0.328233845 | 0.410601572 |
| PLCH1     | -0.051583123 | 0.32840528  | 0.410790224 |
| ARSH      | -0.051576323 | 0.328469129 | 0.410822678 |
| LOC731779 | -0.051575966 | 0.328472483 | 0.410822678 |
| JARID2    | 0.051569777  | 0.328530602 | 0.410863062 |
| CDV3      | -0.051568134 | 0.328546034 | 0.410863062 |
| TMEM185A  | 0.051551124  | 0.328705815 | 0.411037066 |
| TXNDC5    | 0.051544064  | 0.328772146 | 0.411094197 |
| SPANXN3   | 0.05153508   | 0.328856568 | 0.411173943 |
| GDF5      | -0.051498571 | 0.329199789 | 0.411577237 |
| RNF122    | -0.051464344 | 0.329521761 | 0.411953916 |
| HIST1H2BO | 0.051441771  | 0.329734218 | 0.412193644 |
| TAF6L     | 0.0514348    | 0.329799853 | 0.412249817 |
| ANKFN1    | 0.051425922  | 0.329883446 | 0.412311001 |
| LOC151658 | 0.05142401   | 0.329901453 | 0.412311001 |
| SLC6A8    | 0.051423005  | 0.329910911 | 0.412311001 |
| OR4M2     | 0.051415233  | 0.329984107 | 0.412376599 |
| FLJ42627  | -0.051407932 | 0.33005288  | 0.412406035 |
| RRN3P1    | 0.051407314  | 0.330058705 | 0.412406035 |
| NKAIN3    | -0.051406137 | 0.330069786 | 0.412406035 |
| RHBDL3    | 0.051397402  | 0.330152083 | 0.412482982 |
| BIRC3     | -0.051388683 | 0.330234232 | 0.412559735 |
| KIF7      | 0.051354212  | 0.33055916  | 0.412939762 |
| NPDC1     | -0.051348746 | 0.330610705 | 0.412978247 |
| PER4      | -0.051327368 | 0.330812337 | 0.413204195 |
| TXNDC11   | -0.051305441 | 0.331019231 | 0.413436688 |
| C1orf185  | 0.051268779  | 0.331365347 | 0.413834488 |
| ZNF391    | -0.051267303 | 0.331379291 | 0.413834488 |
| ABCG5     | -0.051262695 | 0.331422811 | 0.413862885 |
| SEMA5B    | -0.051256612 | 0.33148027  | 0.413908682 |
| TBP       | 0.051228929  | 0.331741828 | 0.41420931  |
| NXPH3     | 0.05122498   | 0.331779146 | 0.414229935 |
| DCDC2B    | -0.051183463 | 0.332171701 | 0.414694047 |
| ST3GAL1   | -0.051173864 | 0.332262501 | 0.414781402 |
| ZNF582    | 0.051158393  | 0.332408877 | 0.414938122 |
| C5orf15   | -0.05113468  | 0.332633326 | 0.415192271 |
| SPRR2E    | -0.05111066  | 0.332860776 | 0.415447491 |
| LRRTM3    | -0.051108681 | 0.332879519 | 0.415447491 |
| RFC5      | 0.051082257  | 0.333129864 | 0.41573388  |
| OR1S2     | 0.051064376  | 0.333299335 | 0.415919309 |
| 43892     | 0.051053642  | 0.333401098 | 0.41602023  |

|           |              |             |             |
|-----------|--------------|-------------|-------------|
| DAGLA     | -0.05103279  | 0.333598835 | 0.416240887 |
| EI24      | -0.051024286 | 0.333679496 | 0.416315447 |
| FBXL21    | 0.051012177  | 0.333794378 | 0.416413846 |
| C6orf114  | -0.051011566 | 0.333800183 | 0.416413846 |
| CHERP     | -0.050994947 | 0.33395789  | 0.41658449  |
| OR4F4     | -0.050990208 | 0.334002872 | 0.41660103  |
| FHAD1     | -0.050988384 | 0.33402019  | 0.41660103  |
| PLEKHO2   | -0.050986939 | 0.334033906 | 0.41660103  |
| CCL4      | 0.050960477  | 0.334285162 | 0.416888284 |
| SLC7A1    | -0.050937174 | 0.334506529 | 0.41713823  |
| LAYN      | -0.050928738 | 0.334586682 | 0.417212058 |
| LOC731789 | 0.05092366   | 0.334634947 | 0.417235712 |
| MOS       | -0.050922333 | 0.334647554 | 0.417235712 |
| HYMAI     | -0.050916348 | 0.334704441 | 0.417280514 |
| MCM8      | -0.050887946 | 0.334974474 | 0.417591027 |
| EFCAB5    | -0.050876899 | 0.33507954  | 0.417695858 |
| RAB2A     | 0.050874219  | 0.335105034 | 0.417701493 |
| CACNB4    | -0.050866861 | 0.335175029 | 0.417762592 |
| SURF4     | -0.05086435  | 0.335198912 | 0.417766214 |
| FABP5L3   | 0.050823356  | 0.335589072 | 0.418226306 |
| VTN       | 0.050799942  | 0.335812049 | 0.418462226 |
| SNX32     | 0.050799065  | 0.335820401 | 0.418462226 |
| IGSF11    | 0.050785698  | 0.335947743 | 0.418594714 |
| TNFRSF17  | 0.050774392  | 0.336055475 | 0.418702752 |
| FCRLA     | -0.050756328 | 0.336227642 | 0.418891054 |
| NEUROD2   | 0.05074079   | 0.336375785 | 0.419049403 |
| FOXQ1     | 0.050720687  | 0.336567513 | 0.419252492 |
| SLC44A1   | -0.050719282 | 0.336580911 | 0.419252492 |
| DPYSL4    | 0.050710406  | 0.33666559  | 0.419295968 |
| FLJ37201  | -0.050709742 | 0.336671923 | 0.419295968 |
| SLCO1A2   | -0.050709003 | 0.336678977 | 0.419295968 |
| ARHGDI3   | 0.050704141  | 0.336725363 | 0.419327514 |
| SYT4      | 0.050698946  | 0.336774931 | 0.419363018 |
| EMID1     | 0.050694576  | 0.336816638 | 0.41938873  |
| EPHA6     | -0.050661392 | 0.337133423 | 0.419756931 |
| CTNNA1    | -0.050654144 | 0.337202638 | 0.419816862 |
| EVL       | -0.050646481 | 0.337275826 | 0.419881732 |
| CCDC48    | -0.050624942 | 0.337481597 | 0.420092385 |
| LOC653544 | 0.050624354  | 0.337487224 | 0.420092385 |
| PSMD11    | 0.050594708  | 0.337770576 | 0.420418814 |
| GAB4      | 0.050589555  | 0.33781985  | 0.420453866 |
| ZNF830    | -0.050581593 | 0.337895986 | 0.420522344 |
| HSFX2     | 0.050577795  | 0.337932301 | 0.42054126  |
| CA6       | -0.050563882 | 0.338065384 | 0.420680588 |
| PLA2G4F   | 0.050545795  | 0.338238432 | 0.420869626 |
| CEBPG     | 0.050534727  | 0.338344353 | 0.420958224 |

|           |              |             |             |
|-----------|--------------|-------------|-------------|
| C13orf18  | -0.050533937 | 0.33835191  | 0.420958224 |
| WIT1      | 0.050531678  | 0.338373534 | 0.420958829 |
| GKN2      | 0.050511928  | 0.338562608 | 0.42116774  |
| SLC4A2    | 0.050496308  | 0.338712186 | 0.421327495 |
| ACSM2B    | -0.050492221 | 0.338751337 | 0.421349876 |
| HPVC1     | -0.050461969 | 0.339041184 | 0.421684061 |
| HIP1R     | -0.050451033 | 0.339145999 | 0.421788083 |
| OR2T3     | -0.050435412 | 0.339295754 | 0.421930233 |
| HLA-DQB2  | -0.050434691 | 0.33930267  | 0.421930233 |
| CORO2A    | 0.050420147  | 0.339442141 | 0.422077312 |
| SCG5      | 0.050414992  | 0.339491582 | 0.422112435 |
| NKX2-8    | -0.050402754 | 0.339608983 | 0.422232045 |
| LOC84856  | -0.050392764 | 0.339704837 | 0.422301115 |
| MBD3L5    | -0.050392544 | 0.339706948 | 0.422301115 |
| CD33      | -0.050387471 | 0.339755622 | 0.42233526  |
| KRT34     | -0.050382586 | 0.339802502 | 0.422367171 |
| LMAN1L    | -0.050356385 | 0.340054032 | 0.422653438 |
| CALML3    | -0.050350531 | 0.340110235 | 0.422696913 |
| OBFC2A    | -0.050341269 | 0.34019919  | 0.422781084 |
| C13orf36  | -0.050314462 | 0.340456719 | 0.423074726 |
| ANKRD43   | 0.050300057  | 0.340595156 | 0.423220349 |
| SLC10A2   | -0.050294203 | 0.340651426 | 0.42326386  |
| OR10C1    | -0.050289408 | 0.340697519 | 0.423294721 |
| KCNJ14    | 0.050261484  | 0.340966039 | 0.423601913 |
| ARSG      | -0.050255227 | 0.341026227 | 0.423650259 |
| FOSL1     | -0.050244902 | 0.341125559 | 0.423747225 |
| BPY2      | -0.050236115 | 0.341210099 | 0.423825804 |
| KLK4      | 0.05022951   | 0.34127366  | 0.423878318 |
| TNNI1     | -0.050214693 | 0.341416281 | 0.424029013 |
| PSG9      | -0.050210602 | 0.341455669 | 0.424051487 |
| FTHL17    | 0.05019767   | 0.341580181 | 0.424179667 |
| GJC2      | 0.050182605  | 0.341725263 | 0.424333372 |
| MUC5B     | -0.050162387 | 0.341920044 | 0.424548767 |
| SERPINB5  | -0.050134865 | 0.342185289 | 0.424851622 |
| ENO3      | 0.050117971  | 0.342348184 | 0.425027372 |
| LOC116437 | -0.050112921 | 0.342396882 | 0.425061332 |
| TACC2     | -0.050104364 | 0.342479413 | 0.425117444 |
| CYP2F1    | 0.050103808  | 0.342484774 | 0.425117444 |
| FGF9      | 0.050092372  | 0.342595088 | 0.42522787  |
| CALML4    | 0.050086479  | 0.342651951 | 0.425271943 |
| HS6ST2    | 0.05006471   | 0.342862034 | 0.425506164 |
| ZNF565    | 0.05005516   | 0.342954215 | 0.425594043 |
| MTFR1     | 0.050050142  | 0.343002666 | 0.425627646 |
| WFDC13    | 0.050046335  | 0.34303942  | 0.425646732 |
| SRP9      | 0.050011167  | 0.343379098 | 0.426041663 |
| KBTBD6    | -0.049996196 | 0.343523763 | 0.426194601 |

|          |              |             |             |
|----------|--------------|-------------|-------------|
| ACY3     | -0.04998437  | 0.343638065 | 0.426309853 |
| MYO1F    | -0.04997313  | 0.343746722 | 0.426406452 |
| HSPA14   | 0.049971886  | 0.343758754 | 0.426406452 |
| GSC      | 0.049963399  | 0.343840815 | 0.426481678 |
| CDHR1    | -0.049946945 | 0.343999941 | 0.426652477 |
| ATP2A1   | 0.049941206  | 0.344055458 | 0.42669476  |
| LSP1     | 0.049919202  | 0.344268366 | 0.426932219 |
| HEATR7A  | 0.049890426  | 0.344546912 | 0.427251043 |
| RLN3     | 0.049886159  | 0.34458823  | 0.427275674 |
| PLIN5    | 0.04987763   | 0.344670826 | 0.427351482 |
| PUS3     | -0.049866389 | 0.344779708 | 0.427459869 |
| CABP1    | 0.049848511  | 0.344952912 | 0.427647986 |
| LRRC25   | 0.0498423    | 0.345013099 | 0.427695977 |
| LTV1     | 0.04982354   | 0.345194929 | 0.427894748 |
| ALPP     | 0.049815817  | 0.345269797 | 0.427960914 |
| C4orf3   | 0.049808376  | 0.345341944 | 0.4280237   |
| IQCA1    | -0.049768524 | 0.345728517 | 0.42847616  |
| IL21     | -0.049763059 | 0.345781555 | 0.428515225 |
| ARSB     | -0.049713703 | 0.346260736 | 0.429082357 |
| TAC1     | 0.049708127  | 0.346314902 | 0.429122777 |
| HGFAC    | -0.049659492 | 0.346787551 | 0.429658115 |
| ANGPTL5  | -0.049659231 | 0.346790085 | 0.429658115 |
| IQCJ     | -0.049649052 | 0.346889057 | 0.429754002 |
| GPX7     | 0.049646643  | 0.346912491 | 0.429756299 |
| PCDHA3   | -0.049641795 | 0.346959636 | 0.429783278 |
| AQP3     | -0.049639965 | 0.346977431 | 0.429783278 |
| SOX4     | 0.049617706  | 0.347193961 | 0.430006631 |
| ETV7     | 0.049616064  | 0.347209937 | 0.430006631 |
| ZNF781   | 0.04961477   | 0.347222527 | 0.430006631 |
| POTEH    | 0.04960568   | 0.34731098  | 0.430089427 |
| DRGX     | -0.049598636 | 0.347379542 | 0.430147583 |
| IL15RA   | 0.049596035  | 0.347404854 | 0.430148691 |
| KRT80    | -0.049592871 | 0.34743565  | 0.430148691 |
| HMGCS1   | -0.04959152  | 0.347448802 | 0.430148691 |
| IMMT     | -0.049589668 | 0.347466834 | 0.430148691 |
| HLA-DRA  | -0.049584419 | 0.347517934 | 0.43018521  |
| CACNA2D2 | -0.049533599 | 0.348012909 | 0.430749338 |
| C10orf76 | 0.049533188  | 0.348016915 | 0.430749338 |
| EYA4     | 0.049512661  | 0.348216971 | 0.430970169 |
| NKAIN4   | 0.049509878  | 0.348244102 | 0.430976963 |
| ZNF99    | -0.049491245 | 0.34842577  | 0.431174995 |
| PRTFDC1  | 0.049486675  | 0.348470331 | 0.431203345 |
| ZNF219   | 0.049451772  | 0.348810819 | 0.431597855 |
| HAAO     | 0.04944464   | 0.348880425 | 0.431657161 |
| SCML1    | -0.049439032 | 0.348935154 | 0.431698055 |
| C1QTNF6  | 0.04943611   | 0.348963681 | 0.431706529 |

|           |              |             |             |
|-----------|--------------|-------------|-------------|
| DHRS1     | -0.049433009 | 0.348993946 | 0.431717153 |
| LOC149837 | -0.049415039 | 0.349169389 | 0.431907353 |
| CBX4      | 0.049411301  | 0.349205896 | 0.431925682 |
| FAM83E    | -0.049395529 | 0.349359935 | 0.432089374 |
| NOMO1     | 0.049356465  | 0.349741645 | 0.432534613 |
| C4BPA     | -0.049349927 | 0.349805551 | 0.432586783 |
| OR52I2    | -0.049334319 | 0.349958163 | 0.432748638 |
| OR2A12    | -0.049330903 | 0.349991563 | 0.432763068 |
| WFIKKN1   | -0.049323252 | 0.350066391 | 0.432828719 |
| NRIP3     | -0.049303239 | 0.350262163 | 0.433043889 |
| ADK       | 0.049278532  | 0.350503945 | 0.433315914 |
| RFESD     | 0.04927301   | 0.350557998 | 0.43333541  |
| OR10G2    | -0.049272475 | 0.350563233 | 0.43333541  |
| ZNF793    | -0.049245562 | 0.350826757 | 0.43363424  |
| DDI1      | -0.049234968 | 0.350930523 | 0.433735578 |
| GPR97     | -0.049186173 | 0.351408716 | 0.43428095  |
| CCL7      | -0.049185492 | 0.351415391 | 0.43428095  |
| SLC26A1   | -0.049161891 | 0.351646827 | 0.434539995 |
| RAB3B     | -0.049139101 | 0.351870412 | 0.434789307 |
| PDE7A     | 0.049128681  | 0.351972664 | 0.434888671 |
| CMA1      | -0.049118778 | 0.352069857 | 0.434973844 |
| ABCB5     | 0.049117207  | 0.352085281 | 0.434973844 |
| DHRS2     | 0.049108376  | 0.352171973 | 0.435046025 |
| STRA6     | -0.049106805 | 0.352187397 | 0.435046025 |
| FGGY      | -0.049098788 | 0.352266114 | 0.435116273 |
| HSD17B11  | -0.049089169 | 0.352360576 | 0.435205959 |
| C18orf55  | -0.049074856 | 0.352501156 | 0.43535259  |
| WDR49     | 0.049066501  | 0.352583236 | 0.435426959 |
| LOC146481 | -0.049063817 | 0.352609603 | 0.43543252  |
| FAM66E    | -0.049026051 | 0.35298079  | 0.435856869 |
| IGSF3     | -0.049024402 | 0.35299701  | 0.435856869 |
| MGC26647  | -0.04901654  | 0.353074306 | 0.435925282 |
| CDKL2     | -0.049013733 | 0.353101916 | 0.435932345 |
| OR5P3     | -0.04900078  | 0.353229311 | 0.436062592 |
| RNPEP     | 0.048979841  | 0.353435302 | 0.436289843 |
| FLJ90757  | 0.048924637  | 0.353978761 | 0.43693362  |
| BTK       | -0.048919208 | 0.354032237 | 0.436972544 |
| SPDYE4    | 0.04891211   | 0.354102158 | 0.437031759 |
| PTGR2     | -0.048908243 | 0.354140259 | 0.437051698 |
| 44166     | -0.048891212 | 0.354308071 | 0.437231704 |
| PRSS16    | -0.048883012 | 0.354388884 | 0.437286917 |
| REC8      | 0.048882217  | 0.354396728 | 0.437286917 |
| SLC47A1   | -0.048878957 | 0.354428861 | 0.437299471 |
| TBC1D16   | 0.048876396  | 0.354454098 | 0.437303516 |
| SLC16A11  | -0.048860286 | 0.354612934 | 0.43745064  |
| LHX3      | -0.048859845 | 0.35461728  | 0.43745064  |

|           |              |             |             |
|-----------|--------------|-------------|-------------|
| LACE1     | -0.04884008  | 0.354812202 | 0.437663983 |
| ZNF141    | -0.048831494 | 0.354896899 | 0.437741344 |
| CROCCL1   | -0.048824619 | 0.354964731 | 0.437797895 |
| SNORA64   | -0.048806999 | 0.355138602 | 0.437985215 |
| SCNN1B    | -0.048797492 | 0.355232443 | 0.438073819 |
| SLC18A2   | -0.048792251 | 0.355284181 | 0.438110493 |
| LOC100272 | 0.048773761  | 0.35546675  | 0.438308484 |
| RBMXL3    | 0.048711008  | 0.356086795 | 0.439045847 |
| HSPA8     | -0.048699074 | 0.356204789 | 0.439164141 |
| ZNF536    | 0.04869197   | 0.356275037 | 0.439223559 |
| LRRC48    | 0.048664304  | 0.356548702 | 0.439523161 |
| RNF10     | 0.04866294   | 0.356562198 | 0.439523161 |
| NELL1     | 0.048648487  | 0.356705215 | 0.439672239 |
| STMN3     | -0.04862501  | 0.356937612 | 0.43993146  |
| SLC7A14   | 0.048617039  | 0.357016544 | 0.440001515 |
| SLC38A1   | -0.048611345 | 0.357072931 | 0.440043776 |
| SNORA34   | 0.048595451  | 0.357230353 | 0.440210536 |
| LRRC8E    | -0.048579464 | 0.357388741 | 0.440378467 |
| OR4E2     | 0.04856335   | 0.357548437 | 0.440547988 |
| ICA1      | 0.048543978  | 0.357740473 | 0.440757333 |
| UGT3A2    | 0.048539111  | 0.357788728 | 0.440776929 |
| TOX       | -0.04853791  | 0.357800645 | 0.440776929 |
| LOC440461 | 0.048526395  | 0.357914837 | 0.440870435 |
| FSD1      | 0.048525791  | 0.357920823 | 0.440870435 |
| IL15      | -0.048518299 | 0.357995136 | 0.440934698 |
| ZNF137    | 0.048512798  | 0.358049704 | 0.440974636 |
| DGKG      | 0.04850232   | 0.358153662 | 0.441075393 |
| ZNF18     | -0.048496545 | 0.358210963 | 0.441118682 |
| SERPINA3  | 0.048474482  | 0.358429936 | 0.441361045 |
| RAB41     | -0.048448701 | 0.358685913 | 0.44164894  |
| ASNSD1    | 0.04843627   | 0.358809388 | 0.441773661 |
| HIST1H2AA | -0.048430519 | 0.35886652  | 0.441816688 |
| C14orf148 | 0.048424056  | 0.358930727 | 0.44186842  |
| SLC26A3   | -0.048421126 | 0.358959834 | 0.441876938 |
| CPNE5     | -0.048418809 | 0.358982865 | 0.441877975 |
| MSH2      | -0.048409618 | 0.359074189 | 0.441963071 |
| ANKRD55   | -0.048377265 | 0.359395806 | 0.442331591 |
| SMCP      | 0.048372927  | 0.359438948 | 0.442346414 |
| ZNF876P   | -0.048371587 | 0.359452273 | 0.442346414 |
| TMEM196   | 0.048363545  | 0.359532253 | 0.442391793 |
| PCP4      | 0.048363412  | 0.359533576 | 0.442391793 |
| OSTCL     | -0.048339966 | 0.359766813 | 0.442651432 |
| MFI2      | -0.048327252 | 0.359893333 | 0.442779745 |
| ANKS6     | 0.048323561  | 0.359930066 | 0.442797582 |
| TBC1D3P2  | 0.048309944  | 0.360065609 | 0.44293697  |
| LIPF      | -0.048248793 | 0.360674707 | 0.44365885  |



|           |              |             |             |
|-----------|--------------|-------------|-------------|
| CREG2     | 0.048218187  | 0.360979798 | 0.444006713 |
| ABCA13    | -0.048199238 | 0.361168763 | 0.444188953 |
| LOC729991 | -0.048198857 | 0.361172569 | 0.444188953 |
| TRA2B     | 0.04816976   | 0.361462865 | 0.444518523 |
| LSS       | 0.048158953  | 0.361570719 | 0.444623702 |
| POU2F3    | -0.048123786 | 0.361921831 | 0.445027986 |
| CCDC112   | -0.048087857 | 0.362280772 | 0.445441846 |
| C6orf141  | -0.048075928 | 0.362399994 | 0.445544254 |
| UMODL1    | 0.048075047  | 0.362408806 | 0.445544254 |
| DDX53     | -0.048071059 | 0.362448671 | 0.445565759 |
| NMT1      | 0.047988884  | 0.363270689 | 0.446548718 |
| KIAA1210  | 0.047935819  | 0.363802137 | 0.447174396 |
| CD2       | 0.04792748   | 0.363885695 | 0.447249498 |
| GAK       | -0.047907038 | 0.364090583 | 0.447473708 |
| IL31      | 0.047897078  | 0.364190438 | 0.447563389 |
| CHPF      | -0.047895276 | 0.3642085   | 0.447563389 |
| C1QL4     | 0.047887674  | 0.364284727 | 0.44762944  |
| TNFRSF13C | -0.04784832  | 0.364679494 | 0.448086879 |
| AFF2      | -0.04784265  | 0.36473639  | 0.448129138 |
| NCRNA0020 | -0.047830089 | 0.364862468 | 0.448256388 |
| UBXN6     | 0.047827081  | 0.364892656 | 0.448265823 |
| ZNF114    | -0.047820575 | 0.36495797  | 0.448318405 |
| PIGL      | 0.04779955   | 0.365169082 | 0.448550068 |
| FLJ33360  | 0.047774842  | 0.365417274 | 0.448827249 |
| CHRN2     | 0.047765052  | 0.365515653 | 0.448894135 |
| ACAA1     | 0.047764936  | 0.365516811 | 0.448894135 |
| MAK       | -0.047759078 | 0.365575679 | 0.448938746 |
| MGC57346  | 0.04774302   | 0.365737084 | 0.449109263 |
| TCN1      | -0.047729627 | 0.365871741 | 0.449246916 |
| TUBB1     | 0.047709358  | 0.366075575 | 0.449469487 |
| ARMC4     | -0.047695363 | 0.366216357 | 0.449614621 |
| LOC29034  | -0.047678094 | 0.366390123 | 0.449787054 |
| ZNF433    | -0.047676917 | 0.366401977 | 0.449787054 |
| TMEM48    | -0.047663763 | 0.366534372 | 0.449902254 |
| ISCA1     | -0.04766142  | 0.366557955 | 0.449902254 |
| KLRK1     | -0.04766086  | 0.366563594 | 0.449902254 |
| ZNF727    | -0.047646671 | 0.366706444 | 0.450049844 |
| CLEC4GP1  | 0.04763628   | 0.36681109  | 0.450150533 |
| SNX33     | 0.047608351  | 0.367092425 | 0.45046803  |
| WDR5B     | -0.04759731  | 0.367203688 | 0.450576798 |
| GRHPR     | -0.047593225 | 0.367244856 | 0.450599551 |
| OR2L3     | -0.047585977 | 0.367317902 | 0.450661411 |
| SLC16A12  | -0.047569122 | 0.367487818 | 0.450842105 |
| SLC4A11   | 0.047563102  | 0.367548517 | 0.450888796 |
| CTXN3     | 0.04755833   | 0.367596643 | 0.450920059 |
| LOC642929 | 0.047526462  | 0.367918099 | 0.451286582 |

|           |              |             |             |
|-----------|--------------|-------------|-------------|
| C8B       | -0.047511201 | 0.368072093 | 0.451447665 |
| ZSCAN21   | -0.047504102 | 0.368143752 | 0.451494133 |
| SP9       | 0.047502955  | 0.368155321 | 0.451494133 |
| UNC119B   | -0.047498261 | 0.368202709 | 0.451524443 |
| OR4N4     | -0.047483929 | 0.368347401 | 0.451674065 |
| FOXR2     | 0.047467601  | 0.368512296 | 0.45184844  |
| PNMA5     | 0.047451406  | 0.368675886 | 0.452021195 |
| HSD3B7    | 0.047437367  | 0.368817728 | 0.452142824 |
| CDH17     | -0.047437093 | 0.368820496 | 0.452142824 |
| NUP107    | -0.047416696 | 0.369026651 | 0.452367706 |
| LOC151174 | 0.047412619  | 0.369067865 | 0.452390381 |
| POTED     | 0.047402872  | 0.369166405 | 0.452483318 |
| MAT2A     | -0.047389118 | 0.369305491 | 0.452625937 |
| SMARCC1   | 0.04738577   | 0.369339357 | 0.452639588 |
| CEP164    | -0.04738113  | 0.369386288 | 0.452669246 |
| MEPE      | 0.047358531  | 0.36961491  | 0.452913823 |
| SALL4     | -0.047356906 | 0.369631351 | 0.452913823 |
| PATZ1     | 0.047328247  | 0.369921426 | 0.453241368 |
| F8A1      | -0.047309268 | 0.370113588 | 0.453448915 |
| ELSPBP1   | 0.047291071  | 0.370297907 | 0.453646826 |
| ZNF790    | 0.04725576   | 0.370655718 | 0.454057245 |
| PEA15     | 0.047252701  | 0.370686728 | 0.454067301 |
| ODF2      | 0.047242638  | 0.370788743 | 0.454164329 |
| CPLX1     | 0.047238056  | 0.370835199 | 0.454193295 |
| CCNE2     | 0.047213257  | 0.371086694 | 0.454465441 |
| ATHL1     | -0.047211646 | 0.371103038 | 0.454465441 |
| TXNDC2    | -0.047207991 | 0.371140111 | 0.454482894 |
| IL17C     | 0.047185753  | 0.371365749 | 0.45473124  |
| UHRF1BP1  | 0.047178281  | 0.371441578 | 0.45478318  |
| TXNRD1    | 0.047177073  | 0.371453839 | 0.45478318  |
| LRIT2     | -0.0471514   | 0.371714468 | 0.455072412 |
| MUC21     | -0.047148692 | 0.371741966 | 0.455072412 |
| FCN1      | 0.047147051  | 0.371758628 | 0.455072412 |
| POU3F4    | -0.047144225 | 0.371787333 | 0.455079578 |
| PSMD12    | 0.047133818  | 0.37189303  | 0.455180979 |
| MYOC      | 0.04711807   | 0.372053003 | 0.455348793 |
| GPR3      | -0.047113406 | 0.372100392 | 0.455378806 |
| CX3CL1    | -0.047068985 | 0.372551903 | 0.455901259 |
| ADAMDEC1  | -0.047065466 | 0.372587686 | 0.455901259 |
| ADAM11    | 0.047064651  | 0.372595977 | 0.455901259 |
| ZNF14     | 0.047061052  | 0.372632579 | 0.455918032 |
| OR5H2     | 0.04704917   | 0.372753426 | 0.456037872 |
| POU4F2    | 0.047022713  | 0.37302259  | 0.456324714 |
| LOH12CR2  | 0.047021621  | 0.37303371  | 0.456324714 |
| INTS12    | -0.047017604 | 0.373074589 | 0.456346689 |
| LOC100131 | 0.046992291  | 0.373332254 | 0.456621846 |

|           |              |             |             |
|-----------|--------------|-------------|-------------|
| LASS2     | -0.046990694 | 0.37334851  | 0.456621846 |
| AICF      | 0.046988748  | 0.373368322 | 0.456621846 |
| KNG1      | -0.046955495 | 0.373707001 | 0.457007978 |
| GRIK1     | -0.046929991 | 0.373966884 | 0.457297709 |
| RAP1GAP   | 0.046907878  | 0.374192307 | 0.457545269 |
| RASD1     | -0.046897761 | 0.374295464 | 0.457616897 |
| GNA15     | 0.046897626  | 0.374296843 | 0.457616897 |
| CLRN2     | 0.046880464  | 0.374471876 | 0.457794132 |
| LRTOMT    | 0.046878904  | 0.374487784 | 0.457794132 |
| H2AFV     | 0.046862876  | 0.374651305 | 0.457965918 |
| DHRS9     | 0.046857905  | 0.374702027 | 0.457999808 |
| C16orf80  | -0.046850656 | 0.374776004 | 0.458062116 |
| SLC24A2   | 0.046838413  | 0.374900969 | 0.458186732 |
| ZNF320    | 0.046829276  | 0.374994244 | 0.458272605 |
| RDH5      | -0.04681939  | 0.375095181 | 0.45836783  |
| OR3A4     | 0.046815027  | 0.375139734 | 0.458394147 |
| TARS2     | -0.04680694  | 0.375222318 | 0.458447684 |
| DHX38     | -0.046806228 | 0.375229588 | 0.458447684 |
| OR56A3    | 0.046798806  | 0.375305396 | 0.458512174 |
| SEMA4F    | -0.046770899 | 0.375590516 | 0.45883236  |
| IGFBP1    | 0.046763356  | 0.375667607 | 0.458898387 |
| ITGB2     | -0.04675093  | 0.375794622 | 0.459025386 |
| ATP13A2   | 0.046738165  | 0.375925129 | 0.459156636 |
| C9orf85   | 0.046727809  | 0.376031027 | 0.459257813 |
| MYL9      | -0.046696586 | 0.376350417 | 0.459619706 |
| RAB42     | 0.04668001   | 0.376520049 | 0.459798674 |
| TDGF1     | 0.046671755  | 0.376604541 | 0.459873654 |
| NAA50     | -0.046655448 | 0.376771488 | 0.460049306 |
| ELOVL7    | -0.046633102 | 0.377000332 | 0.46030051  |
| IFT172    | 0.046612348  | 0.377212948 | 0.46053187  |
| IL17A     | 0.046604727  | 0.377291034 | 0.460598967 |
| LOC729121 | 0.04656134   | 0.377735809 | 0.461113684 |
| ZNF26     | 0.04653701   | 0.377985374 | 0.461390053 |
| DMRTC1B   | -0.046523303 | 0.378126007 | 0.461533429 |
| FFAR3     | -0.046508717 | 0.378275702 | 0.461687847 |
| ZNF286A   | -0.046497885 | 0.378386895 | 0.461795258 |
| MKRN1     | 0.046437464  | 0.379007483 | 0.462524298 |
| SERHL2    | -0.046424718 | 0.379138479 | 0.46265581  |
| PRPF4     | 0.046415913  | 0.379228987 | 0.462737901 |
| MSX2P1    | -0.046396952 | 0.379423931 | 0.462947408 |
| KIAA1383  | -0.046386666 | 0.379529711 | 0.463048104 |
| AGXT2     | -0.046374896 | 0.379650782 | 0.463167442 |
| CSNK1E    | -0.046369616 | 0.379705097 | 0.46320533  |
| TM4SF20   | -0.046365023 | 0.379752347 | 0.463234594 |
| FBN3      | 0.046333977  | 0.380071853 | 0.463595942 |
| ANP32D    | 0.046285545  | 0.380570608 | 0.464175873 |

|           |              |             |             |
|-----------|--------------|-------------|-------------|
| FMN2      | 0.04625314   | 0.380904531 | 0.464554703 |
| MLLT6     | -0.046248083 | 0.380956664 | 0.464589833 |
| GRXCR2    | -0.046229703 | 0.381146164 | 0.464792472 |
| CALM2     | 0.046193551  | 0.381519059 | 0.465218715 |
| ZNF519    | -0.046180104 | 0.381657823 | 0.465359428 |
| C14orf138 | -0.046135569 | 0.382117599 | 0.465891514 |
| COX8C     | 0.046119136  | 0.382287342 | 0.466069937 |
| EIF4EBP2  | 0.046116702  | 0.382312482 | 0.466072055 |
| EML5      | 0.046084773  | 0.382642432 | 0.466445739 |
| OTOP2     | 0.046074957  | 0.3827439   | 0.466540872 |
| YSK4      | -0.04606628  | 0.382833612 | 0.466621664 |
| HKR1      | 0.046032184  | 0.383186244 | 0.467010023 |
| MED15     | 0.046030938  | 0.383199136 | 0.467010023 |
| RGS1      | -0.045984869 | 0.383675921 | 0.467562476 |
| AVPI1     | 0.045978745  | 0.383739328 | 0.467611131 |
| ZDHHC22   | 0.045965591  | 0.383875551 | 0.467748507 |
| DONSON    | 0.045951094  | 0.384025707 | 0.467902842 |
| NOVA2     | -0.045931587 | 0.384227813 | 0.468120451 |
| SNORA70   | -0.045919332 | 0.384354825 | 0.46824655  |
| SNX3      | 0.045901731  | 0.384537271 | 0.468440161 |
| DGCR2     | -0.045896887 | 0.384587502 | 0.468472696 |
| MT1IP     | -0.045877405 | 0.384789523 | 0.468690113 |
| PARVG     | -0.045871149 | 0.384854413 | 0.468740483 |
| NOD1      | -0.045856697 | 0.385004339 | 0.468894412 |
| KRTAP11-1 | 0.045852884  | 0.3850439   | 0.468913917 |
| PPP1R8    | -0.045847887 | 0.385095755 | 0.468948389 |
| OR2V2     | 0.045844601  | 0.385129851 | 0.468961234 |
| WDR43     | -0.045835992 | 0.385219201 | 0.469041354 |
| C6orf59   | -0.045827719 | 0.385305061 | 0.469117215 |
| CNOT2     | 0.045812734  | 0.385460633 | 0.469277938 |
| CST9L     | 0.045799796  | 0.385594981 | 0.469387908 |
| SNORA48   | 0.045799495  | 0.385598101 | 0.469387908 |
| PRR25     | -0.045778761 | 0.385813465 | 0.469620224 |
| DAZ1      | -0.045776581 | 0.385836109 | 0.469620224 |
| LFNG      | -0.045766182 | 0.385944154 | 0.469723024 |
| FAM50B    | 0.045762209  | 0.38598544  | 0.469744563 |
| C14orf165 | -0.045744737 | 0.386167015 | 0.469936823 |
| KRT9      | -0.04574196  | 0.386195888 | 0.469943243 |
| LOC93432  | -0.045736925 | 0.386248225 | 0.469978212 |
| SRRM4     | 0.045719929  | 0.38642493  | 0.470164497 |
| FGF4      | 0.045715835  | 0.386467504 | 0.47018757  |
| LOC55908  | 0.045632977  | 0.38732975  | 0.471207817 |
| DRD3      | 0.045581572  | 0.38786527  | 0.471830484 |
| DPAGT1    | 0.045577631  | 0.387906337 | 0.471851619 |
| LRRC37B2  | 0.045525104  | 0.388454046 | 0.472488996 |
| RFX8      | -0.045513725 | 0.388572762 | 0.472604529 |

|           |              |             |             |
|-----------|--------------|-------------|-------------|
| OR52E6    | 0.045498857  | 0.388727903 | 0.472764347 |
| EPPK1     | 0.045492178  | 0.388797616 | 0.472798044 |
| PIK3C2G   | -0.045491653 | 0.388803091 | 0.472798044 |
| CACNA2D3  | -0.045458976 | 0.389144245 | 0.473184005 |
| PMP2      | -0.04544482  | 0.389292084 | 0.473334871 |
| ACCN5     | -0.045440099 | 0.389341403 | 0.473361893 |
| ATXN10    | 0.045438142  | 0.389361846 | 0.473361893 |
| VCP       | 0.04543178   | 0.389428309 | 0.473413794 |
| RNASEN    | 0.045428308  | 0.389464582 | 0.47342899  |
| RNASE8    | 0.045409854  | 0.389657418 | 0.473612361 |
| ADH5      | 0.045409321  | 0.389662995 | 0.473612361 |
| KLK12     | -0.045396317 | 0.38979891  | 0.473735882 |
| PAEP      | -0.045395046 | 0.389812197 | 0.473735882 |
| UCKL1AS   | 0.045359153  | 0.390187526 | 0.474163081 |
| ADM       | -0.045352041 | 0.39026192  | 0.474224549 |
| C3orf74   | -0.045349071 | 0.390292988 | 0.474233365 |
| CHAD      | 0.045344973  | 0.390335865 | 0.474256529 |
| FAIM      | 0.04533797   | 0.390409131 | 0.474316608 |
| C4orf50   | 0.045326831  | 0.390525696 | 0.474429283 |
| SEPHS1    | -0.045303131 | 0.390773775 | 0.4746685   |
| HECW1     | -0.04530046  | 0.390801736 | 0.4746685   |
| TSPAN1    | 0.045298825  | 0.39081885  | 0.4746685   |
| CNR1      | -0.045296783 | 0.390840231 | 0.4746685   |
| GGN       | -0.045295288 | 0.390855885 | 0.4746685   |
| CDKN2B    | -0.045294359 | 0.390865616 | 0.4746685   |
| QDPR      | 0.045267823  | 0.391143529 | 0.474977036 |
| ABCB8     | 0.045248058  | 0.391350608 | 0.475171447 |
| ADAP2     | -0.045247987 | 0.391351347 | 0.475171447 |
| FAM123A   | 0.045241454  | 0.39141981  | 0.4752256   |
| MTNR1B    | -0.045238445 | 0.391451342 | 0.475234911 |
| CDH2      | -0.045235008 | 0.391487363 | 0.47524967  |
| CAPZA3    | 0.045217742  | 0.391668355 | 0.475440406 |
| A1BG      | 0.04519921   | 0.39186267  | 0.475624067 |
| EPN2      | -0.045198757 | 0.391867421 | 0.475624067 |
| AKIRIN2   | 0.045194202  | 0.391915191 | 0.475653057 |
| AHSA2     | -0.045166033 | 0.392210691 | 0.475981174 |
| EPHA10    | -0.045163874 | 0.392233344 | 0.475981174 |
| SPTAN1    | -0.045159006 | 0.392284421 | 0.476014151 |
| LOC344967 | -0.045152712 | 0.392350472 | 0.476065293 |
| REEP6     | -0.045141206 | 0.392471237 | 0.476182813 |
| ME3       | -0.045133184 | 0.392555449 | 0.476255971 |
| HMOX1     | 0.04512715   | 0.392618795 | 0.476287856 |
| TSKS      | 0.04512606   | 0.392630245 | 0.476287856 |
| FXYD7     | 0.045121697  | 0.392676047 | 0.476287856 |
| PDE6C     | 0.045121569  | 0.392677394 | 0.476287856 |
| OR7A5     | 0.04511322   | 0.392765062 | 0.476365178 |

|           |              |             |             |
|-----------|--------------|-------------|-------------|
| ZNF84     | -0.045075261 | 0.393163815 | 0.476819766 |
| C8orf71   | 0.045051513  | 0.393413411 | 0.477093417 |
| CD38      | -0.045047193 | 0.393458826 | 0.477119437 |
| PGA4      | -0.045009244 | 0.393857894 | 0.477574279 |
| TCN2      | 0.045001025  | 0.393944353 | 0.477650033 |
| TREX2     | -0.044985044 | 0.3941125   | 0.477824817 |
| BCL9      | -0.044978921 | 0.394176942 | 0.477873854 |
| TFAP2A    | 0.044972593  | 0.394243535 | 0.477925493 |
| IL1F8     | -0.044958173 | 0.394395335 | 0.478080412 |
| MAGEH1    | 0.044944789  | 0.39453625  | 0.47822212  |
| HYLS1     | 0.044916253  | 0.394836802 | 0.478557295 |
| MYO1H     | 0.044901547  | 0.394991753 | 0.478715966 |
| CSPG5     | 0.044898237  | 0.395026632 | 0.478729105 |
| VSIG8     | 0.044895711  | 0.395053244 | 0.478732223 |
| ALS2CR4   | 0.044892782  | 0.395084113 | 0.478740499 |
| PATE4     | -0.044880139 | 0.395217367 | 0.478872832 |
| PML       | -0.044870744 | 0.395316408 | 0.478963696 |
| MYC       | 0.044852503  | 0.395508745 | 0.479162159 |
| HIST1H3J  | -0.044848397 | 0.395552051 | 0.479162159 |
| NMBR      | -0.044848005 | 0.39555618  | 0.479162159 |
| NKX1-2    | -0.044846083 | 0.395576453 | 0.479162159 |
| ACOX2     | -0.04484134  | 0.395626484 | 0.479172995 |
| PDGFRL    | 0.044840672  | 0.395633521 | 0.479172995 |
| CHCHD3    | 0.044835925  | 0.3956836   | 0.479204506 |
| WDR1      | -0.044801606 | 0.396045709 | 0.479613882 |
| C8orf58   | -0.044784023 | 0.396231308 | 0.479809467 |
| DYNC1H1   | -0.044767187 | 0.396409081 | 0.479995552 |
| PSMD10    | -0.044757088 | 0.39651573  | 0.48009314  |
| SULT1C3   | 0.04475499   | 0.396537889 | 0.48009314  |
| SASH3     | -0.044733402 | 0.396765942 | 0.480340045 |
| OR1N2     | 0.044720055  | 0.396906983 | 0.480454385 |
| RILPL1    | 0.044719898  | 0.396908639 | 0.480454385 |
| CTSW      | 0.044672669  | 0.397407955 | 0.481001084 |
| STK31     | 0.04467261   | 0.397408579 | 0.481001084 |
| DCC       | -0.044653105 | 0.39761489  | 0.481221546 |
| TRIM29    | -0.044630919 | 0.397849653 | 0.481476412 |
| IFLTD1    | 0.044626041  | 0.39790128  | 0.48150963  |
| CD83      | 0.044608631  | 0.398085574 | 0.481703378 |
| RHOF      | 0.044590333  | 0.398279321 | 0.481908542 |
| FLJ43860  | 0.044556381  | 0.398638964 | 0.482314396 |
| LOC389332 | 0.044545827  | 0.3987508   | 0.482420399 |
| PSG1      | -0.044526929 | 0.398951107 | 0.482633416 |
| C18orf8   | -0.044519745 | 0.399027259 | 0.48269622  |
| MBD3L1    | 0.044480445  | 0.399444053 | 0.48317106  |
| HIST3H2BB | -0.044466524 | 0.399591745 | 0.483320352 |
| TRIM74    | -0.044445115 | 0.39981895  | 0.483565796 |

|           |              |             |             |
|-----------|--------------|-------------|-------------|
| TMEM174   | -0.044435043 | 0.399925875 | 0.483665743 |
| GRIA2     | 0.044424769  | 0.400034953 | 0.483768284 |
| STRC      | 0.044409556  | 0.400196503 | 0.48391606  |
| OBP2A     | -0.044408685 | 0.40020575  | 0.48391606  |
| ATP6V1G1  | 0.044403494  | 0.400260885 | 0.483953343 |
| CLDN7     | 0.044392216  | 0.400380691 | 0.484060779 |
| OTOP1     | 0.044390553  | 0.400398353 | 0.484060779 |
| FGD3      | 0.044384932  | 0.400458078 | 0.484103594 |
| SLC36A4   | -0.044375207 | 0.400561407 | 0.484180202 |
| NOVA1     | -0.044374391 | 0.400570074 | 0.484180202 |
| ENGASE    | -0.044350262 | 0.400826533 | 0.484460788 |
| CASP4     | 0.044346215  | 0.400869558 | 0.484483387 |
| AZIN1     | -0.044341764 | 0.400916871 | 0.484489439 |
| LEFTY1    | 0.044341167  | 0.400923221 | 0.484489439 |
| PGLYRP4   | -0.044331062 | 0.401030662 | 0.48458987  |
| C19orf75  | 0.044327727  | 0.401066134 | 0.484603328 |
| MAGEB18   | 0.044311659  | 0.401237023 | 0.484763865 |
| ZNF215    | 0.044310657  | 0.40124768  | 0.484763865 |
| ABHD4     | -0.044290279 | 0.401464484 | 0.484996373 |
| EDN3      | -0.04427973  | 0.401576746 | 0.485102565 |
| TBX21     | -0.044274503 | 0.40163237  | 0.485140332 |
| GRIN1     | 0.044264818  | 0.401735455 | 0.485235419 |
| LTK       | -0.044244711 | 0.401949534 | 0.48546455  |
| FAM8A1    | -0.044241389 | 0.401984903 | 0.485477826 |
| LIN9      | 0.044224717  | 0.402162466 | 0.485662817 |
| OVOL1     | -0.044210981 | 0.402308796 | 0.48581007  |
| MGST1     | 0.044197156  | 0.402456103 | 0.485958485 |
| BIRC8     | 0.044192876  | 0.402501714 | 0.485974788 |
| C7orf65   | 0.044191309  | 0.40251841  | 0.485974788 |
| GBX2      | -0.044180207 | 0.40263674  | 0.48606465  |
| ECD       | -0.044179746 | 0.402641653 | 0.48606465  |
| FAM181A   | 0.04416864   | 0.402760042 | 0.48613953  |
| FLJ25758  | 0.04416839   | 0.402762714 | 0.48613953  |
| C21orf130 | -0.044167058 | 0.402776914 | 0.48613953  |
| LOC360030 | 0.044158132  | 0.402872079 | 0.486224922 |
| LOC100133 | 0.044148601  | 0.402973722 | 0.486318124 |
| NCRNA0023 | -0.044132366 | 0.403146877 | 0.486497609 |
| SCGB2A2   | -0.044126395 | 0.403210576 | 0.486544996 |
| KCNH6     | -0.044121551 | 0.403262251 | 0.486577869 |
| CST5      | -0.044117525 | 0.403305208 | 0.486600219 |
| HAP1      | -0.044111179 | 0.403372919 | 0.48664618  |
| RANBP17   | 0.044108363  | 0.403402972 | 0.48664618  |
| TTY1B     | -0.044107085 | 0.40341661  | 0.48664618  |
| C17orf28  | 0.04410406   | 0.403448886 | 0.48664807  |
| GOLGA8F   | 0.044102359  | 0.403467049 | 0.48664807  |
| KBTBD12   | -0.044077348 | 0.403734019 | 0.486940588 |

|            |              |             |             |
|------------|--------------|-------------|-------------|
| OR2D2      | 0.044029257  | 0.404247664 | 0.487530565 |
| NPPA       | 0.044014819  | 0.404401936 | 0.487687088 |
| TMC4       | -0.043995472 | 0.404608731 | 0.487906925 |
| LOC643486  | -0.043978498 | 0.404790219 | 0.488096222 |
| LYZL6      | 0.0438969    | 0.40566331  | 0.489119382 |
| DIO3OS     | -0.043870709 | 0.405943798 | 0.489404734 |
| LOC727677  | -0.043870211 | 0.405949124 | 0.489404734 |
| PNLIPRP1   | 0.04385745   | 0.406085831 | 0.489539911 |
| MTPP       | 0.043850826  | 0.406156794 | 0.489595821 |
| DUS4L      | 0.043835283  | 0.406323353 | 0.489766952 |
| GRK1       | 0.043828453  | 0.406396555 | 0.489813049 |
| OTOP3      | -0.043827125 | 0.406410787 | 0.489813049 |
| HCK        | -0.043815652 | 0.406533782 | 0.489931635 |
| PTPN20B    | 0.043792404  | 0.406783054 | 0.49020238  |
| MOBP       | -0.043785678 | 0.406855191 | 0.490259644 |
| SMN1       | -0.04378245  | 0.40688981  | 0.490271695 |
| GALK2      | -0.043754254 | 0.407192316 | 0.490606508 |
| GOLGA2P3   | -0.043747696 | 0.407262685 | 0.490661607 |
| ADAMTSL5   | -0.043742432 | 0.40731918  | 0.490699986 |
| SMR3A      | -0.043738933 | 0.407356742 | 0.490715553 |
| KCNA2      | -0.043712632 | 0.407639099 | 0.49101715  |
| TNFRSF6B   | 0.043711019  | 0.407656417 | 0.49101715  |
| FLJ40504   | -0.043704389 | 0.407727609 | 0.491073198 |
| FASLG      | -0.043684217 | 0.407944281 | 0.491304448 |
| SGPP2      | -0.04367837  | 0.408007095 | 0.491331747 |
| GCM2       | -0.043677514 | 0.408016291 | 0.491331747 |
| NAGLU      | 0.043664735  | 0.408153599 | 0.491467376 |
| C8orf48    | -0.043647259 | 0.408341419 | 0.491663806 |
| GAA        | -0.043616001 | 0.408677477 | 0.492038689 |
| RPL3L      | 0.043606316  | 0.408781647 | 0.492134355 |
| IRF2BP2    | -0.043602313 | 0.408824695 | 0.492156428 |
| CLEC11A    | -0.043595432 | 0.408898719 | 0.492203182 |
| PAQR5      | -0.043594108 | 0.408912963 | 0.492203182 |
| OR5V1      | -0.043586134 | 0.408998742 | 0.49227668  |
| PURG       | -0.043579086 | 0.409074586 | 0.492338211 |
| DSCAML1    | -0.043559623 | 0.409284034 | 0.492560523 |
| IL29       | 0.043554067  | 0.409343844 | 0.492602734 |
| LPO        | 0.043549743  | 0.409390394 | 0.492628985 |
| NPY6R      | -0.043540877 | 0.409485837 | 0.492710482 |
| TMC8       | -0.043538856 | 0.409507602 | 0.492710482 |
| HMX3       | -0.043534851 | 0.409550727 | 0.4927326   |
| PPP1R1C    | 0.043528461  | 0.409619529 | 0.492760938 |
| KRTAP1-5   | -0.043528068 | 0.409623767 | 0.492760938 |
| ALKBH1     | -0.043518394 | 0.409727952 | 0.492856497 |
| RNF113B    | -0.043502302 | 0.409901287 | 0.493035219 |
| KRTAP10-12 | -0.043495976 | 0.409969437 | 0.493081756 |



|           |              |             |             |
|-----------|--------------|-------------|-------------|
| ATAD5     | -0.043494115 | 0.409989495 | 0.493081756 |
| GPR114    | -0.04347146  | 0.410233627 | 0.493345572 |
| GALNT14   | -0.04343789  | 0.410595554 | 0.493751008 |
| DHRS12    | 0.04340974   | 0.410899188 | 0.494086302 |
| AACS      | 0.043403355  | 0.410968069 | 0.494139292 |
| KRT74     | 0.043396634  | 0.41104059  | 0.494196653 |
| SLC13A3   | 0.043393045  | 0.411079318 | 0.494213379 |
| FADS2     | -0.043368676 | 0.411342347 | 0.494499749 |
| MT1G      | 0.043362062  | 0.411413749 | 0.494555732 |
| LAT2      | -0.043343071 | 0.41161882  | 0.494772381 |
| MAGEB6    | 0.043311839  | 0.411956206 | 0.495148038 |
| WDR27     | -0.043300804 | 0.41207544  | 0.495261459 |
| BLNK      | -0.043294562 | 0.412142908 | 0.495292694 |
| C7orf66   | 0.043293797  | 0.412151169 | 0.495292694 |
| FAM174A   | 0.04328412   | 0.412255772 | 0.495388506 |
| SIGLEC9   | -0.04326154  | 0.412499889 | 0.495651943 |
| GOT1      | -0.043217046 | 0.412981194 | 0.496200331 |
| CYP4Z1    | -0.043173415 | 0.413453479 | 0.496737816 |
| OR2Z1     | 0.043169814  | 0.413492464 | 0.496754685 |
| MMP25     | 0.04314134   | 0.413800872 | 0.497052508 |
| MSC       | -0.043139365 | 0.413822271 | 0.497052508 |
| LRRC16B   | 0.043139     | 0.413826224 | 0.497052508 |
| SYT14L    | -0.043136416 | 0.413854215 | 0.497052508 |
| C1orf114  | -0.043135406 | 0.413865162 | 0.497052508 |
| GRTP1     | 0.043127115  | 0.413955    | 0.497130425 |
| ZDHHC11   | -0.043118323 | 0.414050267 | 0.49721485  |
| PADI6     | 0.04311509   | 0.414085308 | 0.497226947 |
| FBXL19    | 0.043108032  | 0.414161811 | 0.497288826 |
| SCARNA1   | 0.043092268  | 0.414332695 | 0.497464015 |
| CELA3B    | 0.043020949  | 0.415106343 | 0.498362842 |
| ZNF506    | -0.043009972 | 0.415225492 | 0.498475838 |
| LOC100133 | -0.043001183 | 0.415320905 | 0.498560326 |
| ABCC13    | 0.04298269   | 0.41552171  | 0.498771313 |
| LOC284023 | -0.042929641 | 0.41609806  | 0.499433032 |
| APOBEC4   | -0.042923222 | 0.416167831 | 0.499486673 |
| LOC285205 | 0.042889166  | 0.416538116 | 0.499900963 |
| CLVS2     | 0.042885424  | 0.416578807 | 0.499919671 |
| SCARNA7   | 0.042870756  | 0.416738361 | 0.500054639 |
| ZNF711    | 0.042870468  | 0.416741493 | 0.500054639 |
| ALOX5AP   | -0.042844648 | 0.417022435 | 0.500361598 |
| SYT13     | -0.042831917 | 0.417161011 | 0.500497712 |
| NKX2-1    | -0.04281619  | 0.417332221 | 0.500672963 |
| DYX1C1    | 0.04280748   | 0.417427062 | 0.500756577 |
| NEU4      | 0.042766738  | 0.417870849 | 0.501258761 |
| HHLA1     | 0.042759664  | 0.417947929 | 0.501320145 |
| FITM2     | -0.042757421 | 0.417972367 | 0.501320145 |

|           |              |             |             |
|-----------|--------------|-------------|-------------|
| SPRYD4    | -0.04275042  | 0.418048663 | 0.501363259 |
| SNORA49   | -0.042749503 | 0.418058663 | 0.501363259 |
| WNT10A    | 0.042734117  | 0.418226378 | 0.501534191 |
| KRTAP12-3 | -0.042724368 | 0.418332662 | 0.501609917 |
| LOC374443 | 0.042723704  | 0.4183399   | 0.501609917 |
| OAT       | -0.042720344 | 0.418376532 | 0.501623638 |
| PLSCR3    | 0.042706504  | 0.418527463 | 0.501774392 |
| CSF2RA    | -0.042680823 | 0.418807596 | 0.502064591 |
| ACPL2     | -0.04267698  | 0.418849523 | 0.502064591 |
| CNGA3     | 0.042675525  | 0.418865393 | 0.502064591 |
| C7orf4    | -0.04267507  | 0.418870358 | 0.502064591 |
| DEPDC6    | -0.042664256 | 0.418988365 | 0.502175812 |
| DCX       | -0.042657517 | 0.41906191  | 0.502233732 |
| PSAPL1    | 0.042641666  | 0.419234939 | 0.502410868 |
| CTSD      | 0.042632827  | 0.419331434 | 0.50249627  |
| NPHP1     | 0.042628519  | 0.419378481 | 0.502521977 |
| PROK1     | -0.042626241 | 0.419403353 | 0.502521977 |
| C10orf28  | -0.042622948 | 0.419439305 | 0.502534819 |
| OR5K4     | 0.042606433  | 0.419619673 | 0.502720676 |
| VWC2      | -0.042600407 | 0.419685493 | 0.502769285 |
| LOC100130 | 0.042568548  | 0.420033596 | 0.503156034 |
| PGAM2     | 0.042560664  | 0.420119773 | 0.503228996 |
| C8orf85   | 0.042537381  | 0.420374311 | 0.503503603 |
| CXCL3     | 0.042514643  | 0.420622975 | 0.503723043 |
| HES5      | 0.042514498  | 0.420624559 | 0.503723043 |
| SP140     | 0.04251369   | 0.420633402 | 0.503723043 |
| C9orf11   | 0.042501231  | 0.420769686 | 0.503851897 |
| PPRC1     | 0.042499228  | 0.420791601 | 0.503851897 |
| NANOG     | -0.042488397 | 0.420910106 | 0.503963492 |
| BPESC1    | 0.042470657  | 0.421104256 | 0.504165157 |
| BST2      | 0.042468381  | 0.421129168 | 0.504165157 |
| HAVCR2    | -0.042460177 | 0.421218965 | 0.504242347 |
| IGFBP6    | 0.042441612  | 0.421422225 | 0.504455347 |
| TNFRSF1A  | -0.042397924 | 0.421900781 | 0.504997839 |
| C12orf77  | 0.042375941  | 0.422141698 | 0.50525584  |
| NR1H4     | -0.042354122 | 0.422380894 | 0.505511749 |
| OR10A2    | -0.042350831 | 0.422416983 | 0.505524561 |
| CCDC79    | -0.042342984 | 0.422503027 | 0.505597151 |
| PERP      | 0.042328914  | 0.422657348 | 0.505751432 |
| DHCR7     | 0.04232627   | 0.42268635  | 0.505755747 |
| PSG7      | 0.042316525  | 0.422793249 | 0.505853263 |
| STAC2     | -0.042309149 | 0.422874173 | 0.505919689 |
| PLOD2     | 0.042304253  | 0.422927897 | 0.505953569 |
| MED26     | 0.042299588  | 0.422979091 | 0.505984418 |
| CATSPER2P | -0.042293387 | 0.423047143 | 0.506035429 |
| RAB7A     | -0.042288951 | 0.423095831 | 0.506063272 |

|           |              |             |             |
|-----------|--------------|-------------|-------------|
| PYROXD2   | -0.042283082 | 0.423160246 | 0.506109921 |
| RASGEF1A  | 0.042272195  | 0.423279755 | 0.506222455 |
| PRAMEF14  | -0.042261071 | 0.423401894 | 0.50633812  |
| HIST2H3D  | -0.042228738 | 0.423756999 | 0.506732355 |
| COX6A2    | 0.042223309  | 0.423816637 | 0.506773241 |
| CST2      | 0.042217022  | 0.423885713 | 0.506825407 |
| FIG4      | -0.042195602 | 0.424121102 | 0.507076409 |
| PRDM14    | 0.042187165  | 0.424213835 | 0.507156833 |
| PLCB1     | 0.042156786  | 0.424547859 | 0.507525699 |
| TSPAN6    | 0.042115657  | 0.425000313 | 0.508036088 |
| MMP17     | 0.042078937  | 0.425404494 | 0.508488715 |
| SLMO2     | -0.042067492 | 0.425530517 | 0.508608826 |
| CCT6P1    | -0.04206297  | 0.425580315 | 0.508637819 |
| OR2T8     | -0.04203905  | 0.425843797 | 0.508922181 |
| LOC285045 | -0.042015617 | 0.426102006 | 0.509185714 |
| PEX11B    | 0.042014397  | 0.426115446 | 0.509185714 |
| RNASE10   | -0.04200487  | 0.426220452 | 0.509280633 |
| SLC6A15   | 0.042001608  | 0.426256406 | 0.509293036 |
| SLC6A18   | -0.041988248 | 0.426403699 | 0.509436908 |
| FNDC4     | -0.04198549  | 0.426434101 | 0.509436908 |
| ESRP2     | -0.041983725 | 0.426453563 | 0.509436908 |
| CLEC4A    | -0.041978883 | 0.426506952 | 0.509452528 |
| SLC17A8   | -0.041977899 | 0.4265178   | 0.509452528 |
| LGALS9C   | 0.041974386  | 0.426556546 | 0.509468251 |
| SREBF1    | -0.041971628 | 0.426586959 | 0.50947402  |
| ZPBP      | -0.041957125 | 0.426746918 | 0.509634498 |
| PSMB11    | 0.041930877  | 0.427036505 | 0.509920607 |
| MCOLN2    | -0.041930768 | 0.427037705 | 0.509920607 |
| SLC38A11  | -0.041927587 | 0.427072807 | 0.509931947 |
| SNORA16A  | -0.041923178 | 0.427121461 | 0.509959466 |
| PMCHL1    | 0.041919869  | 0.427157981 | 0.509972495 |
| ANKMY1    | 0.041901782  | 0.427357628 | 0.510180264 |
| ST7L      | -0.041881002 | 0.427587076 | 0.510423582 |
| XKR7      | 0.04185239   | 0.427903109 | 0.510770224 |
| DFNB31    | -0.04184885  | 0.427942211 | 0.510786283 |
| C12orf11  | -0.041834501 | 0.42810077  | 0.510944914 |
| CD180     | -0.041826109 | 0.428193511 | 0.511024975 |
| TES       | -0.041810664 | 0.428364228 | 0.511198083 |
| FLJ44054  | -0.041785963 | 0.428637341 | 0.511493119 |
| SNAP91    | 0.041783659  | 0.428662825 | 0.511493119 |
| SLC16A1   | -0.041775568 | 0.428752308 | 0.511569242 |
| GLTPD1    | -0.041764642 | 0.42887317  | 0.511653772 |
| BPGM      | -0.041764518 | 0.428874538 | 0.511653772 |
| KPNA4     | -0.041751582 | 0.429017652 | 0.511793851 |
| IRX5      | -0.041747333 | 0.429064671 | 0.511819282 |
| CALB1     | 0.041721786  | 0.429347406 | 0.512125874 |

|            |              |             |             |
|------------|--------------|-------------|-------------|
| TRIM48     | -0.041708153 | 0.429498335 | 0.512275219 |
| VN1R5      | -0.041697555 | 0.429615672 | 0.512384483 |
| TARBP1     | 0.04168209   | 0.429786951 | 0.512558065 |
| GHRH       | 0.041667215  | 0.429951719 | 0.512705872 |
| CTRB1      | 0.041666253  | 0.429962379 | 0.512705872 |
| CHODL      | 0.041651364  | 0.430127341 | 0.512871871 |
| RAET1K     | -0.041628814 | 0.430377268 | 0.513139154 |
| DRD2       | 0.041615552  | 0.43052429  | 0.513283718 |
| CD300LD    | -0.041606899 | 0.430620225 | 0.513367362 |
| LCE1E      | 0.04159923   | 0.430705275 | 0.513438019 |
| TRMT5      | 0.041596539  | 0.430735115 | 0.513442857 |
| KRTAP8-1   | 0.041591858  | 0.430787025 | 0.513474    |
| MTRF1L     | -0.041572024 | 0.431007034 | 0.513705493 |
| C8orf74    | -0.04156714  | 0.43106122  | 0.51373933  |
| DBX1       | 0.041557126  | 0.431172339 | 0.513841011 |
| TNIP3      | -0.041546769 | 0.431287265 | 0.513947217 |
| KNTC1      | 0.041490957  | 0.431906948 | 0.514654872 |
| SNORA46    | -0.041474125 | 0.432093927 | 0.514846868 |
| FLJ42709   | -0.041457075 | 0.432283381 | 0.515040733 |
| SLC2A4     | -0.041454828 | 0.432308355 | 0.515040733 |
| NXF5       | 0.041432027  | 0.432561799 | 0.515311852 |
| SCGB1D2    | 0.041416236  | 0.432737369 | 0.515490172 |
| KCNK12     | -0.041411944 | 0.432785094 | 0.515516188 |
| CST6       | -0.04138172  | 0.43312128  | 0.515882947 |
| LRP4       | -0.041379606 | 0.433144803 | 0.515882947 |
| CCDC38     | 0.04136644   | 0.433291297 | 0.516026562 |
| ZAP70      | -0.041356454 | 0.433402432 | 0.516128053 |
| ASTE1      | 0.041349486  | 0.433479984 | 0.51618954  |
| MYT1       | 0.041336491  | 0.433624642 | 0.516330927 |
| GTPBP10    | -0.041326765 | 0.433732925 | 0.516428984 |
| AZGP1      | 0.041303667  | 0.433990165 | 0.516680067 |
| TPRG1L     | 0.041301622  | 0.434012933 | 0.516680067 |
| SLITRK1    | 0.041300841  | 0.434021634 | 0.516680067 |
| RAB39B     | -0.041267338 | 0.43439491  | 0.517093522 |
| DEFB109P1B | -0.041236965 | 0.434733473 | 0.51746561  |
| TMEM155    | 0.041230817  | 0.434802029 | 0.517516281 |
| LEPREL2    | -0.041225969 | 0.434856083 | 0.517549686 |
| CRADD      | -0.041220637 | 0.434915546 | 0.517589524 |
| TCTN3      | -0.041213542 | 0.434994674 | 0.517639248 |
| NCKAP5L    | 0.041212229  | 0.435009312 | 0.517639248 |
| LOC285735  | -0.041206996 | 0.435067682 | 0.517677773 |
| TCEAL8     | -0.041197486 | 0.435173764 | 0.517773062 |
| FAM95B1    | -0.041158669 | 0.435606928 | 0.51825748  |
| OR6F1      | 0.041130449  | 0.435921993 | 0.518601344 |
| FOXD4L3    | -0.041117083 | 0.436071263 | 0.518724293 |
| XKR4       | -0.04111653  | 0.436077435 | 0.518724293 |

|           |              |             |             |
|-----------|--------------|-------------|-------------|
| TNFRSF25  | 0.041107323  | 0.436180276 | 0.518815637 |
| UBXN2A    | -0.041066018 | 0.436641819 | 0.519333601 |
| CGRRF1    | 0.041043848  | 0.436889666 | 0.519597354 |
| LCN8      | -0.041036009 | 0.436977318 | 0.519670566 |
| FAM163A   | -0.04103236  | 0.437018125 | 0.519688062 |
| GIF       | 0.041030004  | 0.437044468 | 0.519688355 |
| SNORA14B  | -0.040994286 | 0.437444016 | 0.520132401 |
| MYBPC3    | 0.040990838  | 0.437482597 | 0.520147219 |
| SPANXN1   | 0.040980097  | 0.437602796 | 0.520259069 |
| RELT      | -0.040936432 | 0.438091628 | 0.520809143 |
| PLUNC     | 0.040924616  | 0.438223969 | 0.520935016 |
| C1orf93   | 0.040922307  | 0.438249825 | 0.520935016 |
| HCRTR2    | -0.040919156 | 0.438285128 | 0.520945886 |
| BLCAP     | 0.040916313  | 0.438316966 | 0.520952637 |
| SPATA3    | 0.040880926  | 0.43871348  | 0.521392788 |
| LGALS4    | 0.040834059  | 0.439238934 | 0.521966063 |
| FUT5      | 0.040833226  | 0.439248268 | 0.521966063 |
| CSNK1G2   | -0.040822527 | 0.439368279 | 0.522077522 |
| FAHD2B    | 0.040811402  | 0.439493076 | 0.522194655 |
| CARD9     | 0.040805628  | 0.439557866 | 0.522240478 |
| ADAM21    | -0.040795062 | 0.439676425 | 0.522350176 |
| SLC45A4   | -0.040771806 | 0.439937437 | 0.522608585 |
| FAM35B2   | -0.040770154 | 0.439955982 | 0.522608585 |
| MCM4      | -0.040768669 | 0.439972661 | 0.522608585 |
| LOC100128 | -0.040746078 | 0.440226308 | 0.52285139  |
| ISCU      | 0.040745786  | 0.440229581 | 0.52285139  |
| NEK11     | 0.040733955  | 0.440362456 | 0.52297538  |
| GAST      | 0.040731815  | 0.440386499 | 0.52297538  |
| KRT6B     | -0.040729384 | 0.440413799 | 0.522976615 |
| FDXACB1   | -0.040714214 | 0.440584216 | 0.523143245 |
| VLDLR     | -0.040712216 | 0.440606666 | 0.523143245 |
| SGCE      | -0.040705961 | 0.440676946 | 0.523184913 |
| C12orf36  | -0.040704417 | 0.440694296 | 0.523184913 |
| RXFP3     | -0.040702025 | 0.440721172 | 0.52318563  |
| ZNF681    | 0.040671715  | 0.441061842 | 0.523558835 |
| GRIK2     | -0.040650329 | 0.441302303 | 0.52381305  |
| HOOK2     | -0.040640737 | 0.441410173 | 0.523909863 |
| ATPAF1    | -0.040610456 | 0.441750824 | 0.524281888 |
| BASE      | 0.040608195  | 0.441776267 | 0.524281888 |
| CACNA1B   | -0.040595157 | 0.44192299  | 0.524406735 |
| UFSP2     | 0.040594167  | 0.441934131 | 0.524406735 |
| CLEC2B    | 0.04058563   | 0.442030212 | 0.524489495 |
| MYL3      | 0.040564609  | 0.442266867 | 0.524739032 |
| RFPL1     | -0.040546036 | 0.442476015 | 0.524955906 |
| MYT1L     | -0.040538814 | 0.442557365 | 0.525021143 |
| TP53      | -0.04053056  | 0.442650339 | 0.525082015 |

|           |              |             |             |
|-----------|--------------|-------------|-------------|
| RASGEF1C  | 0.040529577  | 0.442661408 | 0.525082015 |
| C6orf225  | 0.040519915  | 0.442770257 | 0.52517985  |
| MTERFD3   | 0.040517213  | 0.442800706 | 0.525184685 |
| GPR133    | -0.040502938 | 0.442961563 | 0.525344184 |
| SGTB      | -0.040476746 | 0.443256793 | 0.525663016 |
| SRR       | -0.040465012 | 0.443389088 | 0.525788596 |
| LOC285796 | -0.040452352 | 0.443531849 | 0.525898664 |
| ACTR3C    | 0.040452098  | 0.44353472  | 0.525898664 |
| LPAR3     | -0.040441713 | 0.443651852 | 0.526006229 |
| SLC27A5   | -0.040403166 | 0.444086762 | 0.526490527 |
| CFHR1     | 0.040392841  | 0.444203301 | 0.526597341 |
| CCNA1     | -0.04038519  | 0.444289663 | 0.526623306 |
| C15orf57  | -0.040384693 | 0.444295273 | 0.526623306 |
| PPIF      | -0.040383873 | 0.444304533 | 0.526623306 |
| TAAR5     | -0.040380945 | 0.44433758  | 0.526631132 |
| CYP7A1    | -0.040366058 | 0.444505669 | 0.526793518 |
| OR6M1     | 0.040364125  | 0.444527495 | 0.526793518 |
| YIPF7     | 0.040297707  | 0.445277858 | 0.527651347 |
| TMRSS11B  | 0.040275953  | 0.445523784 | 0.527911356 |
| C19orf6   | -0.040248386 | 0.445835534 | 0.528249326 |
| RCN1      | 0.040236371  | 0.445971451 | 0.528378931 |
| KLRC3     | 0.040224994  | 0.446100166 | 0.528483293 |
| SERPINB4  | -0.040223894 | 0.446112611 | 0.528483293 |
| SLC43A2   | -0.040216578 | 0.446195395 | 0.528549923 |
| CADPS     | -0.040201344 | 0.446367811 | 0.528722712 |
| TSC2      | -0.040188058 | 0.446518204 | 0.528869396 |
| AIG1      | 0.040181373  | 0.446593893 | 0.528927587 |
| CASP14    | -0.040159262 | 0.446844271 | 0.529192654 |
| CCDC117   | -0.040099478 | 0.447521653 | 0.529963353 |
| NES       | -0.0400928   | 0.447597348 | 0.530021477 |
| MYBPHL    | 0.04008489   | 0.44768702  | 0.530075085 |
| GFRA2     | -0.040084111 | 0.447695854 | 0.530075085 |
| C7orf57   | 0.040072254  | 0.447830296 | 0.530202743 |
| PRSS33    | 0.040066137  | 0.447899667 | 0.530253351 |
| TMEM109   | 0.040030839  | 0.448300069 | 0.530695826 |
| GRP       | -0.040026478 | 0.448349556 | 0.53072286  |
| KIAA0907  | -0.03997826  | 0.448896884 | 0.531284614 |
| MRGPRX1   | 0.039977816  | 0.448901919 | 0.531284614 |
| SIX6      | 0.039975682  | 0.448926156 | 0.531284614 |
| MAN2C1    | 0.03997527   | 0.44893083  | 0.531284614 |
| AMY2A     | -0.039961791 | 0.44908391  | 0.531434194 |
| OTOL1     | -0.039958235 | 0.449124295 | 0.531450406 |
| ITGB4     | -0.039953761 | 0.449175117 | 0.531478964 |
| SERHL     | 0.039909524  | 0.449677761 | 0.5320421   |
| LRGUK     | 0.03989597   | 0.449831831 | 0.532192771 |
| TRIM59    | 0.03989024   | 0.449896972 | 0.53223822  |

|          |              |             |             |
|----------|--------------|-------------|-------------|
| ZP2      | -0.039883496 | 0.449973649 | 0.532297311 |
| C17orf54 | -0.039877496 | 0.450041875 | 0.532324405 |
| TMEM63C  | 0.039876513  | 0.45005306  | 0.532324405 |
| EVPLL    | -0.03987443  | 0.450076743 | 0.532324405 |
| SF3B3    | -0.039868934 | 0.450139243 | 0.53236671  |
| SPNS3    | -0.03984849  | 0.450371779 | 0.532610094 |
| C22orf42 | -0.039831456 | 0.450565586 | 0.532807651 |
| OR5E1P   | -0.039827177 | 0.450614274 | 0.532833587 |
| CLEC12A  | -0.039798939 | 0.450935672 | 0.533181969 |
| KIF24    | -0.039793414 | 0.450998568 | 0.533224679 |
| ZNF385D  | -0.039747703 | 0.45151916  | 0.533808494 |
| UPK3B    | 0.039743435  | 0.451567784 | 0.533834288 |
| DYM      | 0.039733145  | 0.451685027 | 0.533941195 |
| USP20    | 0.039689413  | 0.452183493 | 0.53449871  |
| BTN3A2   | -0.039671061 | 0.452392768 | 0.534714343 |
| OR4N2    | -0.039664609 | 0.452466359 | 0.534769587 |
| OR10G3   | -0.039620511 | 0.452969486 | 0.535315924 |
| BCL3     | 0.039619382  | 0.452982373 | 0.535315924 |
| APOC4    | 0.039602241  | 0.453178029 | 0.535515366 |
| CEACAM18 | -0.039576793 | 0.45346859  | 0.535805308 |
| SNORD97  | 0.039576039  | 0.453477201 | 0.535805308 |
| SLC7A5   | -0.03957281  | 0.453514076 | 0.535817087 |
| FBXO9    | 0.039565537  | 0.453597137 | 0.53588343  |
| POU1F1   | 0.039516872  | 0.454153174 | 0.536498297 |
| RFPL2    | 0.039515272  | 0.454171468 | 0.536498297 |
| TNK2     | 0.039492837  | 0.454427932 | 0.536769411 |
| ZNF140   | -0.039471045 | 0.454677132 | 0.537031913 |
| USP36    | -0.039440593 | 0.455025485 | 0.537411489 |
| TDG      | -0.039412808 | 0.455343464 | 0.537755149 |
| ACSM3    | -0.039379176 | 0.45572853  | 0.538177993 |
| FAM162B  | -0.039376616 | 0.455757846 | 0.5381807   |
| ABCA12   | -0.039372465 | 0.455805386 | 0.538204925 |
| TUSC1    | -0.039365283 | 0.455887646 | 0.538270141 |
| ICAM1    | -0.039350798 | 0.456053571 | 0.538431562 |
| ZNF512B  | -0.039348628 | 0.456078434 | 0.538431562 |
| OR52B4   | -0.039336313 | 0.45621954  | 0.538538002 |
| SF1      | -0.039336039 | 0.456222678 | 0.538538002 |
| AGBL3    | -0.039311661 | 0.456502068 | 0.538835863 |
| ZNF331   | 0.039252343  | 0.457182307 | 0.539606806 |
| PDIA4    | -0.039236106 | 0.4573686   | 0.539794694 |
| GPR115   | -0.039231271 | 0.457424079 | 0.53982818  |
| ID2B     | -0.039225996 | 0.457484615 | 0.539854411 |
| UTP23    | 0.039223359  | 0.457514879 | 0.539854411 |
| CSAG2    | 0.039222248  | 0.45752763  | 0.539854411 |
| CHD5     | 0.039217531  | 0.457581771 | 0.539886306 |
| RBP4     | 0.039196313  | 0.457825346 | 0.540141692 |

|           |              |             |             |
|-----------|--------------|-------------|-------------|
| MGC16025  | 0.039190211  | 0.457895412 | 0.540192354 |
| IL28A     | -0.039166112 | 0.458172173 | 0.54048684  |
| SORBS3    | -0.039131623 | 0.458568414 | 0.540922227 |
| PAK7      | 0.039087424  | 0.459076489 | 0.541489474 |
| PRR5-ARHG | -0.039078087 | 0.459183869 | 0.541584054 |
| GOLGA3    | 0.039068231  | 0.459297221 | 0.541685666 |
| LOC100128 | 0.039018057  | 0.459874522 | 0.542334405 |
| CLCN2     | -0.03901405  | 0.459920645 | 0.542336029 |
| GINS3     | 0.039013206  | 0.459930364 | 0.542336029 |
| SPRR2F    | 0.038997064  | 0.460116184 | 0.54252302  |
| FTCD      | 0.038976614  | 0.460351668 | 0.542768543 |
| PEX5      | -0.038958071 | 0.460565252 | 0.542988219 |
| IL28B     | -0.038929024 | 0.460899935 | 0.54335063  |
| C4orf51   | 0.038920851  | 0.460994123 | 0.543429499 |
| EPS8L1    | 0.038911839  | 0.461098001 | 0.543511204 |
| ZNF808    | -0.038910102 | 0.461118017 | 0.543511204 |
| SYT8      | 0.038904786  | 0.461179299 | 0.543551266 |
| FOXL2     | 0.038872681  | 0.461549501 | 0.543955398 |
| CHRND     | -0.038859415 | 0.461702509 | 0.544103525 |
| LY9       | -0.038856886 | 0.461731682 | 0.544105707 |
| ACOT1     | 0.038841109  | 0.461913709 | 0.544288002 |
| CLEC4F    | -0.038800866 | 0.462378179 | 0.544803066 |
| UBE2A     | -0.038782984 | 0.462584648 | 0.545014096 |
| ANKRD30B  | 0.038775557  | 0.46267042  | 0.54508058  |
| ASTL      | -0.038773358 | 0.462695817 | 0.54508058  |
| ARHGGEF33 | -0.038761823 | 0.462829046 | 0.545144614 |
| UNKL      | -0.038760218 | 0.462847588 | 0.545144614 |
| JAK3      | 0.03876011   | 0.462848831 | 0.545144614 |
| PITX2     | -0.038757041 | 0.462884278 | 0.545144614 |
| RMST      | -0.038756802 | 0.462887041 | 0.545144614 |
| ARMC6     | 0.03870997   | 0.463428212 | 0.545749681 |
| CCDC140   | 0.038705511  | 0.463479763 | 0.545778115 |
| EVC2      | -0.038700671 | 0.463535709 | 0.545811722 |
| FAM183B   | -0.038695572 | 0.463594664 | 0.545848866 |
| C15orf44  | -0.03869018  | 0.463657011 | 0.545890001 |
| UNC13D    | -0.038681085 | 0.463762173 | 0.545981537 |
| PLA2G2D   | 0.038666233  | 0.463933939 | 0.546151469 |
| UNG       | 0.038647615  | 0.464149309 | 0.546372708 |
| CRYAA     | -0.03864101  | 0.464225737 | 0.546430377 |
| KCNG4     | 0.038626222  | 0.46439685  | 0.546599484 |
| C2orf83   | 0.038617661  | 0.464495935 | 0.546683798 |
| SDC4      | -0.038588847 | 0.464829492 | 0.547044045 |
| FANCF     | -0.038584043 | 0.464885124 | 0.547077187 |
| ST7OT3    | -0.038578835 | 0.464945432 | 0.547115829 |
| E2F5      | 0.038535306  | 0.465449658 | 0.547658151 |
| LRRC18    | 0.038534301  | 0.465461304 | 0.547658151 |



|           |              |             |             |
|-----------|--------------|-------------|-------------|
| KLHL1     | 0.038530967  | 0.465499944 | 0.547671258 |
| OR52A4    | 0.038506989  | 0.465777849 | 0.547965848 |
| TUFT1     | 0.038499724  | 0.465862068 | 0.548032553 |
| ZER1      | 0.038480388  | 0.46608626  | 0.548263902 |
| NEUROG2   | -0.038467166 | 0.466239592 | 0.548411876 |
| CAPN3     | -0.038455904 | 0.466370222 | 0.548533131 |
| CSNK2A1   | -0.038409237 | 0.466911732 | 0.549136341 |
| FGB       | 0.038406954  | 0.466938228 | 0.549136341 |
| AMPD2     | -0.038393304 | 0.467096686 | 0.549290257 |
| CFHR3     | -0.038387963 | 0.467158701 | 0.549322569 |
| BOK       | 0.038386186  | 0.46717933  | 0.549322569 |
| PIWIL3    | 0.038369852  | 0.467369006 | 0.549513151 |
| PPM1N     | 0.038365324  | 0.467421598 | 0.549542543 |
| RNASE9    | -0.0383521   | 0.4675752   | 0.549690679 |
| CCDC125   | -0.038295688 | 0.468230766 | 0.550403482 |
| CDRT15    | -0.038295169 | 0.468236796 | 0.550403482 |
| KHDRBS2   | -0.038290501 | 0.468291071 | 0.550434792 |
| GCNT1     | -0.038266225 | 0.468573353 | 0.550734084 |
| CDK18     | -0.038250041 | 0.468761602 | 0.550922827 |
| CREB3L3   | -0.038239971 | 0.46887875  | 0.55102799  |
| FAM24A    | -0.038230162 | 0.468992883 | 0.551102501 |
| LCLAT1    | -0.038229765 | 0.468997499 | 0.551102501 |
| KCNH3     | -0.038195977 | 0.469390742 | 0.551532045 |
| TTY8      | -0.038164885 | 0.469752776 | 0.551904032 |
| TAS2R30   | -0.038162762 | 0.469777503 | 0.551904032 |
| VGLL2     | 0.038161649  | 0.469790467 | 0.551904032 |
| SLC6A5    | -0.038155819 | 0.469858371 | 0.551951245 |
| PNMA1     | -0.038152933 | 0.46989199  | 0.55195818  |
| OR1G1     | -0.03814638  | 0.46996832  | 0.552015281 |
| TMPRSS11A | -0.038132604 | 0.47012881  | 0.552171223 |
| EML6      | -0.038089432 | 0.470631973 | 0.552729594 |
| FAM176A   | 0.038086072  | 0.470671152 | 0.552743011 |
| NOP14     | 0.038076428  | 0.470783592 | 0.552842457 |
| C12orf54  | 0.038072166  | 0.470833298 | 0.552868227 |
| KRT35     | -0.038046412 | 0.47113366  | 0.553183029 |
| MRFAP1L1  | -0.038044416 | 0.471156944 | 0.553183029 |
| WT1       | -0.038036078 | 0.471254225 | 0.553232599 |
| ZPLD1     | -0.038036035 | 0.471254723 | 0.553232599 |
| ZFP42     | 0.038014381  | 0.471507395 | 0.553496597 |
| MYCN      | -0.037993738 | 0.471748333 | 0.553746791 |
| SLN       | 0.037978185  | 0.471929907 | 0.553927276 |
| PTPN23    | 0.037968971  | 0.472037497 | 0.554020907 |
| ZNF43     | -0.037958428 | 0.472160619 | 0.554132755 |
| CXorf58   | -0.037955342 | 0.472196663 | 0.554142401 |
| HAMP      | -0.037939548 | 0.472381152 | 0.554326241 |
| APLN      | 0.037934692  | 0.472437881 | 0.554360146 |

|           |              |             |             |
|-----------|--------------|-------------|-------------|
| MC4R      | -0.037929752 | 0.472495591 | 0.554362887 |
| MAGEA1    | 0.037929727  | 0.47249589  | 0.554362887 |
| CHRNA1    | 0.037920686  | 0.472601521 | 0.554454155 |
| KATNAL2   | -0.037908669 | 0.472741953 | 0.554586239 |
| XYLB      | 0.037870628  | 0.473186648 | 0.555044336 |
| KRT6C     | 0.037869656  | 0.473198018 | 0.555044336 |
| OR4D11    | 0.037868113  | 0.473216057 | 0.555044336 |
| UBA1      | -0.037832265 | 0.47363535  | 0.555464143 |
| SLC39A11  | -0.037832223 | 0.473635834 | 0.555464143 |
| PABPN1L   | -0.037830359 | 0.473657649 | 0.555464143 |
| LOC643008 | 0.037821329  | 0.473763302 | 0.555499193 |
| NAB2      | -0.037820925 | 0.473768028 | 0.555499193 |
| C9orf45   | -0.037820652 | 0.473771218 | 0.555499193 |
| ARMCX6    | -0.037802568 | 0.473982844 | 0.555714608 |
| HIF3A     | 0.037781116  | 0.474233947 | 0.55597628  |
| KRT6A     | -0.0377623   | 0.474454258 | 0.556201822 |
| UPK1B     | 0.037755161  | 0.47453786  | 0.556267083 |
| LUZP2     | -0.037710191 | 0.475064669 | 0.556851847 |
| KRT31     | 0.037677159  | 0.475451836 | 0.557272869 |
| NISCH     | 0.037650619  | 0.475763037 | 0.557604228 |
| SMR3B     | -0.037647457 | 0.475800118 | 0.557604228 |
| LCE6A     | -0.037645887 | 0.475818541 | 0.557604228 |
| WDR72     | 0.037622282  | 0.476095426 | 0.557895875 |
| CNGB1     | -0.037617203 | 0.476155022 | 0.557932882 |
| ITIH3     | 0.037590149  | 0.476472506 | 0.558272046 |
| TMEM132D  | -0.037546562 | 0.476984244 | 0.558825879 |
| PC        | 0.037545109  | 0.477001311 | 0.558825879 |
| NLRP7     | 0.037530493  | 0.477172986 | 0.558994119 |
| FABP12    | 0.037515708  | 0.477346676 | 0.559164699 |
| RNF222    | -0.037507636 | 0.477441521 | 0.559242906 |
| CEBPZ     | -0.037492627 | 0.4776179   | 0.559416602 |
| VSTM1     | -0.037484503 | 0.477713384 | 0.559495532 |
| NKX2-2    | 0.037460795  | 0.477992083 | 0.559789023 |
| MT1F      | 0.037423437  | 0.478431441 | 0.560270619 |
| APCS      | 0.037405272  | 0.478645155 | 0.560487933 |
| MTMR8     | -0.03738326  | 0.478904189 | 0.560758286 |
| BFAR      | 0.037374094  | 0.479012085 | 0.560851647 |
| TMSB4Y    | 0.03737136   | 0.47904427  | 0.560856358 |
| AICDA     | -0.037360572 | 0.479171272 | 0.560972069 |
| FBXO31    | 0.037354843  | 0.47923872  | 0.561018052 |
| RBM46     | 0.037343727  | 0.479369614 | 0.561138298 |
| MORN3     | -0.03733349  | 0.479490179 | 0.561246439 |
| TRY6      | 0.037322651  | 0.479617847 | 0.561362881 |
| FAM47B    | 0.037310554  | 0.479760351 | 0.561485912 |
| MTA1      | -0.037308941 | 0.479779351 | 0.561485912 |
| MYO19     | -0.037302751 | 0.479852281 | 0.561538263 |

|            |              |             |             |
|------------|--------------|-------------|-------------|
| IFITM5     | -0.037277204 | 0.480153341 | 0.561836578 |
| RBMY1E     | 0.037276236  | 0.480164759 | 0.561836578 |
| CD6        | 0.037272109  | 0.480213404 | 0.561836578 |
| HPYR1      | -0.037271545 | 0.480220047 | 0.561836578 |
| HIST1H4F   | 0.037266692  | 0.48027725  | 0.561869632 |
| LOC100233  | -0.037264362 | 0.480304726 | 0.561869632 |
| KPRP       | 0.037233478  | 0.480668876 | 0.562251677 |
| PHF21B     | 0.037231176  | 0.480696021 | 0.562251677 |
| PSD2       | -0.037229481 | 0.480716008 | 0.562251677 |
| TNK1       | -0.037215972 | 0.480875349 | 0.562391888 |
| LEKR1      | -0.037212946 | 0.480911048 | 0.562391888 |
| OR10H5     | -0.037212136 | 0.480920605 | 0.562391888 |
| C9orf170   | -0.037200688 | 0.481055668 | 0.562516801 |
| FXN        | 0.037171633  | 0.481398543 | 0.562884687 |
| SNX7       | -0.037155511 | 0.481588851 | 0.563074148 |
| UGT2B11    | 0.037151713  | 0.481633688 | 0.563093513 |
| TCTE1      | 0.03713752   | 0.481801263 | 0.563256364 |
| IGDCC4     | -0.037125967 | 0.481937705 | 0.5633828   |
| VPS11      | -0.037117142 | 0.482041938 | 0.563453165 |
| HIST1H4K   | 0.03711608   | 0.482054483 | 0.563453165 |
| FAM25A     | -0.037108915 | 0.482139119 | 0.563513275 |
| PKP3       | 0.037106935  | 0.482162501 | 0.563513275 |
| ISYNA1     | 0.037104154  | 0.482195356 | 0.563518603 |
| C6orf221   | 0.03709298   | 0.482327373 | 0.56363981  |
| OTOS       | 0.037072494  | 0.482569456 | 0.563889616 |
| CEACAM3    | 0.037061384  | 0.482700772 | 0.564009966 |
| COPG       | -0.03705587  | 0.482765947 | 0.564033261 |
| DDX43      | -0.037054906 | 0.482777352 | 0.564033261 |
| DKFZp434J0 | -0.037051987 | 0.482811858 | 0.564040485 |
| 43899      | 0.037037751  | 0.482980173 | 0.564182524 |
| MID1IP1    | 0.037036911  | 0.4829901   | 0.564182524 |
| LOC100132  | -0.036995372 | 0.483481405 | 0.564711996 |
| P2RY2      | -0.036993793 | 0.483500087 | 0.564711996 |
| EXOG       | -0.036981084 | 0.48365046  | 0.564854498 |
| TRAM1      | 0.036969906  | 0.483782731 | 0.564953256 |
| B4GALNT4   | 0.036969144  | 0.483791757 | 0.564953256 |
| XKRY2      | 0.036945963  | 0.484066137 | 0.565240523 |
| C12orf49   | 0.036933359  | 0.484215362 | 0.565381622 |
| CYP27B1    | 0.036927557  | 0.484284059 | 0.565428683 |
| ACSF3      | 0.03690941   | 0.484498973 | 0.565646445 |
| ADAM5P     | 0.036894273  | 0.484678281 | 0.565822614 |
| KCNB2      | 0.036847423  | 0.485233458 | 0.566437533 |
| C15orf26   | -0.036842629 | 0.485290283 | 0.566470663 |
| MAP1LC3B2  | -0.036802329 | 0.485768159 | 0.566995246 |
| PEX11G     | -0.036786699 | 0.485953562 | 0.567178409 |
| LOC284688  | 0.036778432  | 0.486051634 | 0.567259628 |

|          |              |             |             |
|----------|--------------|-------------|-------------|
| FAM74A3  | -0.036774008 | 0.486104132 | 0.567287652 |
| GAS8     | 0.036755038  | 0.486329242 | 0.567517102 |
| CHRNA2   | 0.03672519   | 0.486683561 | 0.567897295 |
| FAM131C  | 0.036716739  | 0.486783896 | 0.567981093 |
| ALKBH5   | -0.036669822 | 0.487341171 | 0.568584107 |
| RBMY3AP  | 0.036668422  | 0.487357806 | 0.568584107 |
| SHC1     | 0.036664484  | 0.4874046   | 0.56860539  |
| BEST1    | 0.03664741   | 0.487607499 | 0.568808771 |
| SDR9C7   | -0.036626842 | 0.487851994 | 0.569060649 |
| RHO      | -0.036620134 | 0.487931743 | 0.569120338 |
| OR2L1P   | -0.036612803 | 0.4880189   | 0.569175175 |
| FNDC8    | 0.036611372  | 0.488035917 | 0.569175175 |
| OR5K3    | -0.036608584 | 0.488069076 | 0.569180514 |
| CELF4    | 0.036605029  | 0.488111345 | 0.569196477 |
| ALDH1A1  | 0.03659274   | 0.488257492 | 0.569333565 |
| OR12D2   | 0.036575192  | 0.488466224 | 0.569543609 |
| MYOG     | 0.036551587  | 0.488747075 | 0.569837714 |
| GGT6     | -0.036546437 | 0.488808365 | 0.56987581  |
| TIPRL    | 0.036532195  | 0.488977872 | 0.570040058 |
| GNG11    | -0.036519915 | 0.489124049 | 0.570177091 |
| HAO1     | -0.036511156 | 0.489228336 | 0.57026528  |
| GOLGA8E  | -0.036501335 | 0.48934527  | 0.570368199 |
| ZNF679   | -0.036496407 | 0.489403959 | 0.570403222 |
| CXCL13   | -0.036470028 | 0.48971814  | 0.570735999 |
| FAM71A   | 0.036420924  | 0.490303294 | 0.571384522 |
| KLHL30   | -0.036397263 | 0.490585377 | 0.5716798   |
| GABRA5   | -0.036379548 | 0.49079663  | 0.57189251  |
| C9orf153 | 0.036373427  | 0.490869643 | 0.571944123 |
| ZNF384   | -0.036369971 | 0.490910861 | 0.571958685 |
| MED9     | 0.036336967  | 0.491304621 | 0.572383967 |
| MIB2     | 0.036325751  | 0.491438475 | 0.572506419 |
| ADRBK2   | -0.036308402 | 0.491645559 | 0.572704263 |
| OBSL1    | -0.036306705 | 0.491665819 | 0.572704263 |
| C14orf50 | -0.036283167 | 0.491946856 | 0.572998107 |
| C9orf66  | -0.036271639 | 0.492084536 | 0.57312495  |
| SLIT1    | -0.036258623 | 0.492239998 | 0.573272489 |
| NETO2    | -0.036199285 | 0.492949092 | 0.574064743 |
| MMEL1    | -0.036193762 | 0.493015124 | 0.574108069 |
| ZNF283   | 0.036184581  | 0.493124883 | 0.574202306 |
| NUDT15   | 0.036179927  | 0.493180534 | 0.574233532 |
| E2F7     | -0.036174417 | 0.49324643  | 0.574276683 |
| CEACAM8  | -0.036163244 | 0.493380052 | 0.574398675 |
| MAP4     | -0.036149495 | 0.493544498 | 0.574539626 |
| PRDM12   | 0.036148298  | 0.493558821 | 0.574539626 |
| SOX18    | 0.036123075  | 0.493860601 | 0.574855143 |
| DACT2    | -0.036120365 | 0.493893028 | 0.574855143 |

|           |              |             |             |
|-----------|--------------|-------------|-------------|
| HYAL1     | -0.036118407 | 0.493916462 | 0.574855143 |
| MTF2      | -0.036113781 | 0.493971825 | 0.57488598  |
| TTC12     | -0.036106791 | 0.494055485 | 0.574949745 |
| CXCR2P1   | -0.036096555 | 0.494178003 | 0.57505872  |
| C1QTNF9   | 0.036077451  | 0.494406719 | 0.575291253 |
| GGT8P     | -0.036052929 | 0.49470037  | 0.575597332 |
| VIT       | -0.036050658 | 0.494727569 | 0.575597332 |
| LANCL2    | 0.036030125  | 0.494973541 | 0.57584987  |
| ARV1      | -0.036019223 | 0.495104168 | 0.575968193 |
| RIMS3     | 0.035992344  | 0.495426302 | 0.576309276 |
| C3orf43   | -0.035974015 | 0.495646021 | 0.57653119  |
| SPAM1     | 0.0359582    | 0.495835659 | 0.576673512 |
| SLC18A1   | 0.035957626  | 0.495842542 | 0.576673512 |
| PLA2G3    | 0.035956566  | 0.495855246 | 0.576673512 |
| TRDN      | -0.035939027 | 0.496065608 | 0.576884472 |
| MSLN      | 0.035916597  | 0.49633468  | 0.577163678 |
| FAM196A   | -0.035900589 | 0.496526774 | 0.577353343 |
| OR52N2    | 0.035896121  | 0.496580391 | 0.577381976 |
| S1PR4     | 0.035879973  | 0.49677421  | 0.577543596 |
| APIG2     | 0.035879708  | 0.496777394 | 0.577543596 |
| RDH8      | 0.035828685  | 0.497390063 | 0.578222118 |
| RIMBP3    | -0.035822579 | 0.497463421 | 0.578273641 |
| SHBG      | 0.035814398  | 0.497561701 | 0.578354128 |
| POTEG     | 0.035803415  | 0.497693653 | 0.578473742 |
| LOC728643 | -0.035798423 | 0.497753634 | 0.578480386 |
| PRSS27    | -0.035798105 | 0.497757464 | 0.578480386 |
| COMMD2    | 0.035768519  | 0.498113043 | 0.57885985  |
| GLP1R     | 0.035756113  | 0.49826219  | 0.578999389 |
| ARMC9     | 0.03571525   | 0.498753614 | 0.579536625 |
| OR52B2    | -0.035693166 | 0.499019307 | 0.579811523 |
| AMHR2     | -0.035682738 | 0.499144787 | 0.579906809 |
| LRRTM4    | 0.035681511  | 0.499159554 | 0.579906809 |
| CECR6     | 0.035643585  | 0.499616082 | 0.580403329 |
| SRGAP3    | -0.035620921 | 0.499889001 | 0.580686506 |
| SNORA5B   | 0.035587457  | 0.500292115 | 0.581120879 |
| ABCD4     | 0.035560268  | 0.500619771 | 0.581467557 |
| CCNY      | -0.035513628 | 0.501182084 | 0.582086732 |
| GATA5     | -0.035490784 | 0.501457624 | 0.582372789 |
| ESRRA     | 0.035438694  | 0.502086225 | 0.583068819 |
| GADD45G   | -0.035429963 | 0.502191633 | 0.583157223 |
| DCDC1     | -0.035415141 | 0.502370589 | 0.583331018 |
| MCOLN1    | 0.035407898  | 0.502458048 | 0.583346291 |
| KRT36     | 0.035407438  | 0.50246361  | 0.583346291 |
| ERAP2     | 0.035406775  | 0.502471618 | 0.583346291 |
| TYRO3     | 0.035402506  | 0.502523173 | 0.583372136 |
| GPSM1     | 0.035376961  | 0.502831735 | 0.583696317 |

|           |              |             |             |
|-----------|--------------|-------------|-------------|
| PDLIM4    | -0.035371242 | 0.502900824 | 0.583742491 |
| FBXO4     | 0.035359721  | 0.503040031 | 0.583870044 |
| S100B     | 0.035356129  | 0.503083432 | 0.583870955 |
| MACROD2   | -0.035354804 | 0.503099452 | 0.583870955 |
| FUT2      | -0.035331129 | 0.503385583 | 0.584168981 |
| SLC34A1   | 0.035312375  | 0.503612319 | 0.58439805  |
| TRIML1    | -0.035302113 | 0.503736395 | 0.584473944 |
| OR52E8    | -0.035299724 | 0.503765286 | 0.584473944 |
| KIF5A     | -0.035299684 | 0.503765767 | 0.584473944 |
| MAP2K7    | 0.035292228  | 0.503855945 | 0.584544515 |
| GPR158    | 0.035284909  | 0.503944461 | 0.584613149 |
| GP9       | -0.035260607 | 0.504238434 | 0.584920108 |
| PDE6H     | -0.035250148 | 0.504364986 | 0.585032833 |
| HIST1H3A  | 0.035236644  | 0.504528404 | 0.585188303 |
| TMEM184A  | -0.035229191 | 0.504618616 | 0.585258852 |
| C6orf168  | -0.035225886 | 0.504658618 | 0.585271161 |
| NCDN      | -0.035205018 | 0.50491123  | 0.585530027 |
| TFF1      | 0.035185489  | 0.505147711 | 0.585765294 |
| RNF151    | 0.035183406  | 0.505172931 | 0.585765294 |
| C10orf111 | 0.035170746  | 0.505326261 | 0.585908971 |
| UBA2      | 0.035155624  | 0.505509446 | 0.586087245 |
| CALM1     | 0.035152737  | 0.505544419 | 0.586093673 |
| PPIC      | 0.035120314  | 0.505937315 | 0.586515026 |
| SEMA6B    | -0.035071693 | 0.506526791 | 0.587164205 |
| CD74      | 0.035066294  | 0.506592261 | 0.587190637 |
| CT47A11   | 0.03506495   | 0.506608563 | 0.587190637 |
| RXFP2     | -0.035060866 | 0.506658101 | 0.587213878 |
| TPMT      | -0.035058433 | 0.506687616 | 0.587213912 |
| TJP3      | -0.035035371 | 0.506967379 | 0.587503948 |
| CYP11B2   | -0.035031085 | 0.507019388 | 0.587530031 |
| SCAP      | 0.035016487  | 0.507196527 | 0.587701102 |
| COLEC12   | 0.035005556  | 0.507329197 | 0.587820628 |
| RGNEF     | -0.034996008 | 0.507445096 | 0.587907818 |
| KIR3DL3   | -0.034994493 | 0.507463489 | 0.587907818 |
| SNTG2     | -0.034977972 | 0.507664058 | 0.588105969 |
| GPX6      | 0.034963208  | 0.50784334  | 0.588254485 |
| C1orf130  | 0.034962549  | 0.507851336 | 0.588254485 |
| FOXD2     | 0.034955914  | 0.507931921 | 0.58831361  |
| RBMX1B    | 0.034938233  | 0.508146681 | 0.588528128 |
| ACSM1     | 0.034930564  | 0.508239845 | 0.588571198 |
| T         | 0.034930306  | 0.508242977 | 0.588571198 |
| PRSS55    | 0.034921033  | 0.508355651 | 0.588667449 |
| CA4       | -0.034903445 | 0.508569366 | 0.588880686 |
| TFAP2C    | -0.034893401 | 0.508691441 | 0.588987794 |
| REPIN1    | 0.034889542  | 0.508738352 | 0.589007865 |
| GNG3      | -0.034867634 | 0.509004682 | 0.589281958 |

|           |              |             |             |
|-----------|--------------|-------------|-------------|
| LRG1      | 0.034860013  | 0.509097343 | 0.589354972 |
| SLC12A3   | 0.034854238  | 0.509167577 | 0.589402017 |
| LIMS3-LOC | 0.034829639  | 0.509466752 | 0.589714058 |
| ADAM32    | -0.034809493 | 0.509711845 | 0.589963466 |
| GXYLT2    | -0.034801605 | 0.509807829 | 0.59004027  |
| ELAVL3    | -0.034798768 | 0.509842353 | 0.590045935 |
| SLC10A3   | 0.03478877   | 0.509964028 | 0.590152456 |
| GLIPR1L1  | -0.034782381 | 0.510041789 | 0.590208148 |
| NXPH1     | 0.034773697  | 0.510147482 | 0.590296154 |
| FAM73B    | 0.034762747  | 0.510280784 | 0.590416094 |
| ERGIC2    | 0.034753586  | 0.510392325 | 0.590510844 |
| YRDC      | -0.034737303 | 0.510590596 | 0.59069897  |
| C10orf95  | -0.034735361 | 0.510614249 | 0.59069897  |
| ZAN       | 0.034722885  | 0.510766201 | 0.590840433 |
| F12       | -0.034687893 | 0.511192513 | 0.591299233 |
| SNORA55   | 0.03460439   | 0.512210576 | 0.592442422 |
| OR51M1    | 0.034597775  | 0.512291279 | 0.592501354 |
| ZNF542    | 0.034593963  | 0.512337786 | 0.592510581 |
| KRTAP5-3  | -0.034589855 | 0.512387896 | 0.592510581 |
| QSOX2     | -0.034589805 | 0.512388513 | 0.592510581 |
| PNLIP     | -0.03457598  | 0.512557198 | 0.592671231 |
| ZNF792    | -0.034569446 | 0.512636934 | 0.592729014 |
| FLJ40330  | -0.034552167 | 0.512847824 | 0.592938428 |
| FLJ35024  | 0.034519539  | 0.513246162 | 0.593323445 |
| UBE2E2    | 0.034518363  | 0.51326052  | 0.593323445 |
| DHDPSL    | 0.034517569  | 0.513270214 | 0.593323445 |
| NEK5      | -0.03449446  | 0.513552458 | 0.593615254 |
| KLRB1     | 0.034481733  | 0.513707923 | 0.593760493 |
| FERMT3    | 0.034474671  | 0.513794201 | 0.59382575  |
| TREX1     | -0.034468669 | 0.513867541 | 0.59387605  |
| CDC20B    | -0.034458616 | 0.513990386 | 0.593983551 |
| HKDC1     | 0.034431767  | 0.514318537 | 0.594328285 |
| C10orf46  | -0.03439269  | 0.514796347 | 0.594837747 |
| SYCP1     | 0.034390825  | 0.514819152 | 0.594837747 |
| CISD2     | 0.034384312  | 0.514898814 | 0.594869073 |
| HLA-DRB6  | 0.034383724  | 0.514906004 | 0.594869073 |
| PTH       | 0.03434388   | 0.515393472 | 0.595397703 |
| PRLR      | 0.034334684  | 0.515506019 | 0.595493177 |
| KRT13     | 0.034322068  | 0.515660444 | 0.595635168 |
| NELL2     | -0.034319755 | 0.515688755 | 0.595635168 |
| ATP6V1G2  | -0.034287923 | 0.516078491 | 0.596050754 |
| IGFBPL1   | 0.034245023  | 0.516603974 | 0.596623066 |
| CPO       | -0.034216492 | 0.516953611 | 0.596992239 |
| MIR155HG  | 0.034197326  | 0.517188546 | 0.597228917 |
| IGFL4     | -0.034182094 | 0.517375306 | 0.597409939 |
| OTOR      | -0.034144197 | 0.517840103 | 0.597911969 |

|           |              |             |             |
|-----------|--------------|-------------|-------------|
| CCDC129   | -0.034097618 | 0.518411669 | 0.598537213 |
| FGL1      | 0.034085149  | 0.518564731 | 0.598679225 |
| SAFB2     | 0.034063374  | 0.518832082 | 0.598944023 |
| MT1B      | -0.034061569 | 0.518854245 | 0.598944023 |
| STAT4     | -0.034044883 | 0.519059173 | 0.599145855 |
| ACSL3     | -0.034020289 | 0.519361279 | 0.599451094 |
| AGMAT     | 0.034018455  | 0.519383812 | 0.599451094 |
| UBAP2L    | 0.033995747  | 0.519662849 | 0.599738388 |
| SNORA51   | -0.033987219 | 0.51976767  | 0.599824601 |
| MLLT1     | -0.033974661 | 0.519922029 | 0.599967969 |
| ZNF322A   | 0.033971331  | 0.519962962 | 0.599980438 |
| ASB13     | -0.033954322 | 0.520172086 | 0.60018697  |
| HCG26     | -0.033941128 | 0.520334325 | 0.600339383 |
| C2orf73   | -0.033930736 | 0.52046213  | 0.600452051 |
| LANCL3    | -0.033917811 | 0.520621117 | 0.60060068  |
| RESP18    | 0.033903854  | 0.520792818 | 0.600763958 |
| LOC154822 | -0.033900044 | 0.5208397   | 0.600783239 |
| NCRNA0020 | -0.03387046  | 0.521203759 | 0.601168358 |
| ZNF382    | -0.033848878 | 0.52146943  | 0.601439955 |
| SLAMF8    | 0.033829368  | 0.521709668 | 0.601682189 |
| FLJ16779  | 0.033821851  | 0.52180224  | 0.601754104 |
| NXPH2     | -0.033805242 | 0.522006801 | 0.60195515  |
| NEFM      | 0.033801217  | 0.522056381 | 0.601977466 |
| PRKAG3    | 0.033773568  | 0.522397048 | 0.602335411 |
| LOC646851 | -0.03375259  | 0.522655577 | 0.602580262 |
| TMBIM1    | -0.033751427 | 0.52266992  | 0.602580262 |
| KIAA1967  | -0.033746693 | 0.522728275 | 0.602612654 |
| TIMELESS  | 0.03368975   | 0.523430432 | 0.603387187 |
| NUP133    | 0.033687287  | 0.523460821 | 0.603387293 |
| HCN1      | -0.033672582 | 0.523642226 | 0.603540268 |
| CEP63     | -0.033671616 | 0.523654145 | 0.603540268 |
| C10orf113 | 0.03364652   | 0.523963823 | 0.603822764 |
| MRGPRX3   | -0.033645887 | 0.523971645 | 0.603822764 |
| ANGPTL3   | -0.033644383 | 0.523990208 | 0.603822764 |
| MKRN3     | 0.033638967  | 0.524057046 | 0.603864842 |
| CXCR6     | -0.033616778 | 0.524330964 | 0.604144142 |
| LIG3      | 0.033614417  | 0.524360105 | 0.604144142 |
| STK24     | 0.033607243  | 0.524448687 | 0.604211246 |
| MAX       | 0.033601216  | 0.52452311  | 0.604262032 |
| FAM71C    | -0.033584504 | 0.524729493 | 0.604431492 |
| SLC30A10  | -0.033584389 | 0.52473091  | 0.604431492 |
| KRT38     | 0.033576439  | 0.524829107 | 0.60450964  |
| ZNF816A   | 0.033567345  | 0.52494145  | 0.604604071 |
| LYPD1     | 0.033533723  | 0.525356871 | 0.605047542 |
| SPINK6    | 0.033495404  | 0.525830544 | 0.605550007 |
| PAR1      | -0.033493509 | 0.525853971 | 0.605550007 |



|          |              |             |             |
|----------|--------------|-------------|-------------|
| GLUD1    | 0.03348831   | 0.525918256 | 0.605589018 |
| RIPPLY1  | 0.033485574  | 0.525952095 | 0.605592968 |
| GGNBP1   | 0.033462001  | 0.526243627 | 0.605893614 |
| IL21R    | -0.033459381 | 0.526276036 | 0.605895899 |
| CCDC40   | -0.033420447 | 0.526757735 | 0.606415417 |
| HTT      | 0.033413965  | 0.526837955 | 0.606472709 |
| TGFB1    | -0.033407333 | 0.526920038 | 0.60653214  |
| ADH1A    | -0.033404032 | 0.526960892 | 0.606544108 |
| FZR1     | 0.033396698  | 0.527051671 | 0.606581829 |
| OR8D2    | -0.033396463 | 0.527054581 | 0.606581829 |
| VSTM2A   | -0.033392307 | 0.527106026 | 0.606605982 |
| RNF139   | 0.03338251   | 0.527227318 | 0.606680633 |
| SLC35A2  | -0.033380518 | 0.52725198  | 0.606680633 |
| LHX5     | -0.033379686 | 0.527262284 | 0.606680633 |
| SNX31    | -0.033376659 | 0.527299762 | 0.606688703 |
| PLA2G2C  | 0.033372664  | 0.527349229 | 0.606710566 |
| C6orf118 | 0.033340935  | 0.527742169 | 0.607127566 |
| LIPK     | 0.033329883  | 0.527879083 | 0.607249996 |
| BBS7     | -0.033305239 | 0.528184436 | 0.607566166 |
| LDHA     | 0.033291846  | 0.528350418 | 0.607721992 |
| RLTPR    | 0.03326722   | 0.528655674 | 0.608025097 |
| HPCA     | 0.033265661  | 0.528674997 | 0.608025097 |
| SLC35D3  | 0.033254355  | 0.528815186 | 0.608151206 |
| LCE3C    | 0.033240506  | 0.528986919 | 0.608313575 |
| ZFY      | -0.033188628 | 0.529630492 | 0.609018491 |
| FAM19A4  | 0.033164057  | 0.529935455 | 0.609333983 |
| TOX2     | -0.033127779 | 0.53038587  | 0.609816674 |
| MYO9B    | -0.033120242 | 0.53047947  | 0.609889081 |
| C17orf78 | 0.033115233  | 0.530541676 | 0.609925387 |
| FBXW12   | 0.033111518  | 0.530587817 | 0.609943222 |
| PROKR2   | -0.033100329 | 0.530726801 | 0.610067777 |
| NBL1     | 0.033088555  | 0.530873079 | 0.610200702 |
| MEOX2    | -0.033049205 | 0.531362077 | 0.610676048 |
| SOHLH1   | 0.033048586  | 0.531369771 | 0.610676048 |
| IL4      | 0.033047874  | 0.531378621 | 0.610676048 |
| HOPX     | -0.033041875 | 0.531453186 | 0.610726497 |
| SMPD1    | -0.03303215  | 0.53157409  | 0.610830188 |
| BRD8     | 0.03302907   | 0.531612374 | 0.610838935 |
| ILDR1    | -0.033025894 | 0.53165186  | 0.610849062 |
| TLE6     | 0.032937673  | 0.532749306 | 0.612074675 |
| TMEM31   | 0.032924464  | 0.532913721 | 0.612228252 |
| RRN3P2   | -0.032919304 | 0.532977966 | 0.612231727 |
| PLCB3    | -0.032918132 | 0.532992552 | 0.612231727 |
| XRCC2    | -0.032916039 | 0.533018612 | 0.612231727 |
| SPANXN5  | 0.032914344  | 0.533039715 | 0.612231727 |
| PFKL     | 0.032908971  | 0.533106597 | 0.612273234 |

|           |              |             |             |
|-----------|--------------|-------------|-------------|
| CECR5     | 0.032890908  | 0.533331517 | 0.612496232 |
| OR51B6    | -0.032883534 | 0.533423353 | 0.612566374 |
| IL20RA    | -0.032875316 | 0.533525706 | 0.612648587 |
| IL10RB    | 0.032861828  | 0.53369371  | 0.612806171 |
| TTC38     | -0.032836879 | 0.53400456  | 0.61312775  |
| IDUA      | -0.032821038 | 0.534201965 | 0.613319044 |
| OR52M1    | 0.032815086  | 0.534276158 | 0.613368864 |
| HTR3A     | 0.032804335  | 0.534410164 | 0.613487342 |
| C1orf74   | -0.032786281 | 0.534635246 | 0.613710353 |
| TYRP1     | -0.032774279 | 0.534784898 | 0.613846757 |
| MRPL3     | -0.032757567 | 0.534993322 | 0.614036363 |
| APIP      | 0.03275609   | 0.535011748 | 0.614036363 |
| LOC541473 | -0.032750937 | 0.535076017 | 0.614074735 |
| GSX2      | -0.032739294 | 0.535221254 | 0.61420602  |
| EMX1      | -0.032734742 | 0.535278041 | 0.614229081 |
| SRRM3     | 0.032732739  | 0.535303034 | 0.614229081 |
| OR3A2     | -0.032724756 | 0.535402641 | 0.614307979 |
| NOTUM     | 0.032713199  | 0.535546845 | 0.614418424 |
| C18orf20  | -0.032712097 | 0.535560603 | 0.614418424 |
| OR2T2     | 0.032676917  | 0.535999709 | 0.614872253 |
| COL21A1   | -0.032675457 | 0.536017935 | 0.614872253 |
| IFI27     | 0.032667927  | 0.536111946 | 0.614944672 |
| DDX23     | 0.032664673  | 0.536152569 | 0.61495585  |
| CLSTN1    | -0.032607668 | 0.536864585 | 0.615737054 |
| NHLH2     | 0.032599854  | 0.536962213 | 0.615755193 |
| SIGLEC1   | -0.032599569 | 0.536965784 | 0.615755193 |
| SLC37A4   | -0.032598978 | 0.536973158 | 0.615755193 |
| C3orf77   | 0.032568006  | 0.537360251 | 0.616163599 |
| HIST1H2AD | 0.032533807  | 0.537787831 | 0.61661838  |
| GABRQ     | -0.032508205 | 0.538108026 | 0.616949991 |
| PI15      | -0.032486306 | 0.538381996 | 0.617228568 |
| COL4A6    | -0.03247406  | 0.538535231 | 0.617368704 |
| C9orf70   | 0.032459007  | 0.538723613 | 0.617549114 |
| MUC13     | 0.03244072   | 0.538952525 | 0.61777596  |
| NKX2-3    | -0.032404676 | 0.539403837 | 0.618257692 |
| CACNG7    | 0.032390743  | 0.539578354 | 0.618405083 |
| CBLN1     | -0.032389451 | 0.539594534 | 0.618405083 |
| LOC729156 | 0.032368166  | 0.539861186 | 0.618675078 |
| AGPAT9    | -0.032346263 | 0.540135643 | 0.618953986 |
| LOC283404 | 0.032291999  | 0.540815921 | 0.619663486 |
| ASTN2     | -0.032291911 | 0.540817025 | 0.619663486 |
| SPDYE2    | -0.032284331 | 0.540912082 | 0.619736745 |
| CAPN6     | -0.032274537 | 0.541034913 | 0.619841816 |
| MPP4      | 0.032256437  | 0.541261967 | 0.620066272 |
| CCDC74B   | -0.032241182 | 0.541453356 | 0.620249846 |
| MYH1      | -0.032229652 | 0.54159804  | 0.620379902 |

|          |              |             |             |
|----------|--------------|-------------|-------------|
| FGF11    | 0.032191383  | 0.542078401 | 0.620894425 |
| OPN5     | -0.032183826 | 0.542173278 | 0.620951228 |
| TBC1D21  | 0.03218174   | 0.542199464 | 0.620951228 |
| IRX3     | -0.032179983 | 0.542221535 | 0.620951228 |
| HMSD     | 0.032161385  | 0.542455073 | 0.621182956 |
| FAAH     | -0.032151686 | 0.542576899 | 0.621286738 |
| CCR6     | -0.032144998 | 0.542660902 | 0.621347201 |
| C15orf43 | -0.032138852 | 0.542738112 | 0.62139988  |
| TAAR6    | -0.032119839 | 0.542976986 | 0.621577443 |
| RPAP1    | -0.032119308 | 0.542983654 | 0.621577443 |
| C1orf110 | -0.032119055 | 0.542986833 | 0.621577443 |
| SALL3    | 0.032110617  | 0.543092863 | 0.621663086 |
| MGC2889  | 0.032083693  | 0.543431252 | 0.622010285 |
| BEYLA    | -0.032081187 | 0.543462752 | 0.622010285 |
| SLC15A1  | 0.032079029  | 0.54348988  | 0.622010285 |
| GSTK1    | 0.032074994  | 0.543540612 | 0.6220326   |
| ATP6AP1L | -0.032038335 | 0.544001564 | 0.622524343 |
| CARD10   | 0.032035462  | 0.544037702 | 0.622529926 |
| NOTO     | 0.032025513  | 0.544162838 | 0.622637341 |
| GPC5     | -0.032002844 | 0.544448025 | 0.62290661  |
| PGCP     | 0.032001834  | 0.544460726 | 0.62290661  |
| RGL4     | 0.031997471  | 0.544515631 | 0.622908693 |
| LRFN5    | -0.031996718 | 0.544525103 | 0.622908693 |
| SFXN5    | -0.031982432 | 0.544704879 | 0.623078557 |
| PPME1    | 0.031975498  | 0.544792143 | 0.623142584 |
| IFNA14   | 0.031971882  | 0.544837656 | 0.623158851 |
| ZNF497   | 0.031938233  | 0.545261251 | 0.623607524 |
| OR51B5   | 0.031921226  | 0.545475414 | 0.623816634 |
| BTG4     | -0.031907321 | 0.545650548 | 0.623981088 |
| MEAF6    | -0.031895828 | 0.54579532  | 0.624110806 |
| MAPK11   | -0.031883909 | 0.545945468 | 0.624246655 |
| OR51I2   | -0.031876374 | 0.546040411 | 0.624308    |
| ALDH18A1 | 0.031874164  | 0.546068259 | 0.624308    |
| CLDN6    | 0.031872187  | 0.546093164 | 0.624308    |
| CSDA     | 0.031861324  | 0.546230063 | 0.624428661 |
| SERINC2  | 0.031858008  | 0.546271852 | 0.624440588 |
| LOC84740 | -0.031822041 | 0.546725224 | 0.624922966 |
| C3orf79  | -0.03180985  | 0.546878936 | 0.625062787 |
| PRAC     | 0.031779066  | 0.54726719  | 0.625451984 |
| FXR2     | -0.031777871 | 0.547282263 | 0.625451984 |
| COL22A1  | 0.031774728  | 0.547321901 | 0.62546139  |
| DYSFIP1  | 0.031767116  | 0.547417936 | 0.625486559 |
| HP       | 0.031764745  | 0.54744785  | 0.625486559 |
| DEGS1    | -0.03176303  | 0.547469479 | 0.625486559 |
| TBX22    | -0.031763024 | 0.547469556 | 0.625486559 |
| PVR      | 0.031758253  | 0.547529746 | 0.625519441 |

|           |              |             |             |
|-----------|--------------|-------------|-------------|
| RHCE      | -0.031753243 | 0.547592961 | 0.625555774 |
| AOX2P     | -0.031708228 | 0.548161104 | 0.626168888 |
| C18orf18  | -0.031654497 | 0.548839617 | 0.626907999 |
| KCNJ10    | 0.031647222  | 0.548931512 | 0.626977006 |
| FADS6     | 0.03162906   | 0.549160976 | 0.627203122 |
| GCKR      | -0.031619911 | 0.549276588 | 0.627299188 |
| HSD17B2   | 0.031591367  | 0.549637353 | 0.627675204 |
| HSPC159   | -0.031583473 | 0.549737147 | 0.627730608 |
| SNORD89   | -0.031582542 | 0.54974891  | 0.627730608 |
| HTR4      | -0.031572034 | 0.549881764 | 0.627846309 |
| HRC       | 0.031556345  | 0.550080156 | 0.628036823 |
| CALB2     | 0.031551169  | 0.550145612 | 0.628074355 |
| FITM1     | 0.031548758  | 0.550176104 | 0.628074355 |
| KLHDC8A   | 0.031544366  | 0.55023165  | 0.62810176  |
| SPATA4    | -0.031539996 | 0.550286921 | 0.628128849 |
| IGLL1     | 0.031502701  | 0.550758741 | 0.628614118 |
| KRT28     | -0.031501401 | 0.550775181 | 0.628614118 |
| EPHB2     | 0.031487998  | 0.550944798 | 0.628771671 |
| TPCN1     | -0.031472887 | 0.551136056 | 0.628953903 |
| DCAF12L2  | 0.031460333  | 0.551294968 | 0.629099203 |
| CSN2      | 0.031452193  | 0.551398028 | 0.629180756 |
| C4orf40   | 0.031440271  | 0.55154897  | 0.629316932 |
| HPD       | -0.031437664 | 0.551581981 | 0.629317691 |
| SLCO4A1   | -0.031435228 | 0.551612836 | 0.629317691 |
| IGSF21    | 0.031428159  | 0.551702356 | 0.629383767 |
| MRPL44    | 0.031407046  | 0.551969765 | 0.629652759 |
| CYorf15B  | 0.031341937  | 0.552794805 | 0.630557794 |
| MLPH      | -0.031335836 | 0.552872153 | 0.630609905 |
| LOC401431 | -0.031324557 | 0.553015151 | 0.630720701 |
| NYNRIN    | -0.031323178 | 0.553032632 | 0.630720701 |
| FAM81A    | -0.031301178 | 0.553311609 | 0.630973144 |
| ADAM23    | -0.031300725 | 0.553317348 | 0.630973144 |
| PLEKHA4   | 0.031292204  | 0.553425428 | 0.631036748 |
| LOC150527 | -0.031291331 | 0.553436497 | 0.631036748 |
| KCNH2     | 0.031272781  | 0.553671801 | 0.631236647 |
| LOC154449 | -0.031270046 | 0.553706495 | 0.631236647 |
| KCNA1     | 0.031270014  | 0.553706903 | 0.631236647 |
| DBF4B     | 0.031260921  | 0.553822272 | 0.631332029 |
| SLC26A7   | -0.031235003 | 0.554151162 | 0.631670791 |
| ST8SIA3   | -0.031226763 | 0.554255751 | 0.631753851 |
| TTTY5     | 0.031216391  | 0.554387403 | 0.631847822 |
| KCNJ15    | 0.031213945  | 0.554418449 | 0.631847822 |
| AXIN2     | -0.031212769 | 0.554433377 | 0.631847822 |
| HVCN1     | -0.031159814 | 0.555105836 | 0.632545112 |
| CRNN      | 0.031159583  | 0.555108759 | 0.632545112 |
| C12orf40  | -0.031145552 | 0.555287004 | 0.632682307 |

|          |              |             |             |
|----------|--------------|-------------|-------------|
| MYL10    | 0.031145104  | 0.555292697 | 0.632682307 |
| ZAR1     | 0.031127973  | 0.555510353 | 0.632894089 |
| ZNF389   | 0.031104439  | 0.555809435 | 0.63319861  |
| ZNF642   | 0.031055396  | 0.556432944 | 0.633872673 |
| FAM110B  | 0.031015294  | 0.556943026 | 0.634414531 |
| KIR3DL2  | 0.031012992  | 0.556972315 | 0.634414531 |
| C12orf60 | -0.030999765 | 0.557140621 | 0.634569944 |
| SPESP1   | 0.030956459  | 0.557691807 | 0.635161405 |
| SULT4A1  | -0.030915509 | 0.558213262 | 0.63571894  |
| GOLT1B   | -0.030899717 | 0.558414417 | 0.63591166  |
| RIMS4    | -0.030894195 | 0.558484764 | 0.635923875 |
| TMEM194B | 0.030892031  | 0.558512338 | 0.635923875 |
| RAD21    | -0.030889558 | 0.558543838 | 0.635923875 |
| MOSC1    | -0.030888849 | 0.558552871 | 0.635923875 |
| GTF2E2   | 0.0308703    | 0.558789213 | 0.636153689 |
| SNORA59B | -0.030865662 | 0.558848322 | 0.636153689 |
| FAM200A  | 0.030865487  | 0.558850554 | 0.636153689 |
| STAC     | 0.030851706  | 0.559026193 | 0.636317252 |
| C11orf45 | -0.030834132 | 0.5592502   | 0.636535848 |
| TMEM35   | -0.030831349 | 0.559285675 | 0.636539846 |
| FAM81B   | 0.030820112  | 0.559428943 | 0.636666518 |
| GRIN2B   | -0.030817149 | 0.559466727 | 0.636673135 |
| GSTT2    | -0.030790759 | 0.559803255 | 0.637019703 |
| TBL1Y    | -0.030787161 | 0.559849151 | 0.63703553  |
| NLRP10   | -0.030782237 | 0.559911957 | 0.637070594 |
| SNORA11  | 0.030772336  | 0.560038251 | 0.637177889 |
| HR       | -0.030763303 | 0.560153495 | 0.637272599 |
| IRGC     | 0.030721298  | 0.560689521 | 0.637845985 |
| HMGXB3   | -0.030703797 | 0.560912927 | 0.638063685 |
| RNF215   | 0.030690386  | 0.561084146 | 0.638222    |
| TFRC     | -0.030683366 | 0.561173782 | 0.638287502 |
| EPGN     | -0.030651426 | 0.561581703 | 0.638714999 |
| NHEDC1   | -0.030643978 | 0.561676845 | 0.638760312 |
| CD300LB  | -0.030643285 | 0.561685693 | 0.638760312 |
| P4HTM    | -0.030625136 | 0.561917573 | 0.638953739 |
| GPT      | 0.03062495   | 0.561919949 | 0.638953739 |
| ADAP1    | -0.030607029 | 0.562148956 | 0.639143911 |
| CEACAM21 | 0.030606839  | 0.562151381 | 0.639143911 |
| IFNA1    | 0.030593026  | 0.56232793  | 0.639308142 |
| ASZ1     | 0.030589885  | 0.562368071 | 0.639317282 |
| LCE1C    | 0.030581357  | 0.562477086 | 0.639404713 |
| CGA      | 0.030549363  | 0.562886165 | 0.639833217 |
| DENND4B  | -0.030518309 | 0.563283345 | 0.640248149 |
| WFDC10B  | -0.03051567  | 0.563317101 | 0.640249975 |
| ZNF569   | 0.03049197   | 0.563620325 | 0.640558053 |
| PCLO     | -0.030489404 | 0.563653166 | 0.640558822 |

|           |              |             |             |
|-----------|--------------|-------------|-------------|
| NSMAF     | -0.030484228 | 0.563719405 | 0.640597544 |
| ASIP      | -0.03048134  | 0.563756357 | 0.640602981 |
| CTNNAL1   | 0.030450256  | 0.564154228 | 0.640984251 |
| CTPS2     | 0.030450097  | 0.564156262 | 0.640984251 |
| AGBL1     | -0.030437096 | 0.564322705 | 0.641136783 |
| ZNF98     | -0.030411061 | 0.564656097 | 0.64147896  |
| TRPC3     | -0.03040776  | 0.564698381 | 0.641490403 |
| C15orf55  | -0.03040368  | 0.564750635 | 0.64151317  |
| POU2F2    | -0.030392072 | 0.564899321 | 0.641645467 |
| NPR2      | -0.030374875 | 0.565119637 | 0.641859107 |
| TUBBP5    | 0.030371162  | 0.565167204 | 0.641876525 |
| LOC347376 | 0.03036798   | 0.565207985 | 0.641886235 |
| PSAP      | 0.030352462  | 0.565406835 | 0.642075447 |
| SBSN      | -0.030338392 | 0.565587156 | 0.642243597 |
| LOC284009 | -0.030325157 | 0.565756815 | 0.642399622 |
| C1orf210  | -0.030291455 | 0.566188929 | 0.642853622 |
| SLC43A3   | -0.030253181 | 0.566679841 | 0.643374324 |
| C9orf57   | -0.030246622 | 0.566764003 | 0.643433196 |
| KBTBD5    | 0.030240006  | 0.56684888  | 0.643487661 |
| CDK11B    | 0.030237846  | 0.566876602 | 0.643487661 |
| KRTAP4-7  | 0.030233526  | 0.566932037 | 0.643492988 |
| DGAT2L6   | -0.030232444 | 0.566945919 | 0.643492988 |
| THBS4     | -0.030219498 | 0.567112058 | 0.643644876 |
| KIF2B     | 0.03020913   | 0.567245116 | 0.643753028 |
| CD58      | 0.030207036  | 0.567272001 | 0.643753028 |
| SOX14     | 0.030203207  | 0.567321143 | 0.643772112 |
| CHAT      | 0.030177391  | 0.567652571 | 0.644111501 |
| PPY2      | -0.03017019  | 0.56774504  | 0.644177239 |
| C1orf228  | 0.030167841  | 0.567775198 | 0.644177239 |
| LOC200726 | 0.030136953  | 0.568171896 | 0.644578157 |
| PSG11     | -0.030135287 | 0.568193299 | 0.644578157 |
| KRTCAP3   | -0.030129212 | 0.56827134  | 0.644629969 |
| CT47A6    | 0.030122129  | 0.568362337 | 0.644696471 |
| LOC146336 | 0.030118718  | 0.56840616  | 0.644709458 |
| LY6G6F    | 0.030112166  | 0.568490334 | 0.644735038 |
| LOC100134 | -0.030111923 | 0.568493461 | 0.644735038 |
| TUBA1A    | 0.030090223  | 0.568772311 | 0.645014553 |
| ARHGEF5   | -0.030055704 | 0.569216023 | 0.645444185 |
| SLC5A2    | 0.030053441  | 0.569245116 | 0.645444185 |
| SAA4      | 0.030051263  | 0.569273119 | 0.645444185 |
| CEACAM20  | 0.030050666  | 0.569280799 | 0.645444185 |
| LOC340094 | 0.03004227   | 0.569388754 | 0.645529832 |
| CEACAM16  | 0.030017771  | 0.569703814 | 0.645836737 |
| OLIG2     | 0.030016177  | 0.569724318 | 0.645836737 |
| SPOCD1    | 0.030006862  | 0.569844132 | 0.64593579  |
| ATP1B1    | -0.030001213 | 0.569916794 | 0.645981386 |

|           |              |             |             |
|-----------|--------------|-------------|-------------|
| PP14571   | 0.029992129  | 0.570033661 | 0.646053212 |
| KRT72     | -0.029991244 | 0.570045043 | 0.646053212 |
| RPAP3     | -0.029977732 | 0.570218896 | 0.64621347  |
| NCRNA0017 | 0.029968182  | 0.570341789 | 0.646315962 |
| CMTM2     | 0.029915636  | 0.571018166 | 0.647045621 |
| ADORA3    | -0.029878697 | 0.571493881 | 0.647514288 |
| IFNA5     | -0.029878471 | 0.571496794 | 0.647514288 |
| FKBP10    | 0.029871847  | 0.571582123 | 0.647548455 |
| APOF      | 0.029871082  | 0.571591981 | 0.647548455 |
| TBC1D3    | -0.029863984 | 0.57168342  | 0.647615205 |
| C4orf22   | -0.029856095 | 0.571785047 | 0.647693488 |
| COX6B2    | 0.029843458  | 0.571947883 | 0.647841093 |
| SULT2A1   | -0.029805206 | 0.57244089  | 0.648362642 |
| GTF3C2    | -0.029791452 | 0.572618204 | 0.648526588 |
| EIF4E1B   | -0.029788762 | 0.572652888 | 0.648528988 |
| ZNF512    | -0.029780202 | 0.57276326  | 0.6486171   |
| TRIM10    | -0.029776385 | 0.572812475 | 0.64863595  |
| C4orf23   | 0.029769011  | 0.572907573 | 0.64870675  |
| TEF       | -0.029758786 | 0.573039432 | 0.648819165 |
| TRAPPC2   | -0.029742537 | 0.573249022 | 0.649019573 |
| FAM173B   | -0.029728063 | 0.573435745 | 0.649170082 |
| PRTN3     | -0.029727179 | 0.573447154 | 0.649170082 |
| ARHGAP22  | 0.02969222   | 0.573898276 | 0.649643845 |
| C1orf92   | 0.029676166  | 0.574105489 | 0.649841469 |
| PPM1E     | -0.029671173 | 0.574169948 | 0.649877494 |
| SV2A      | 0.029667748  | 0.574214162 | 0.649890602 |
| LEO1      | 0.029664165  | 0.574260421 | 0.649906023 |
| KRTAP12-1 | 0.029652817  | 0.574406939 | 0.650034901 |
| NPVF      | -0.029640691 | 0.574563513 | 0.650139197 |
| NTF4      | -0.029640623 | 0.574564392 | 0.650139197 |
| OR11A1    | 0.029626358  | 0.574748617 | 0.650310705 |
| MAP1LC3A  | 0.029621302  | 0.574813917 | 0.65034764  |
| HOXB5     | 0.029595981  | 0.575141019 | 0.650680759 |
| KLK7      | -0.029553647 | 0.575688084 | 0.651262678 |
| HBG1      | -0.02954371  | 0.575816522 | 0.651370976 |
| OR51I1    | -0.029528043 | 0.576019071 | 0.651563092 |
| CNN2      | 0.029523633  | 0.576076092 | 0.651569397 |
| C18orf26  | 0.029521311  | 0.576106109 | 0.651569397 |
| C17orf105 | -0.02952002  | 0.576122797 | 0.651569397 |
| BRSK2     | 0.029514573  | 0.57619324  | 0.651584542 |
| PTPN2     | 0.029513924  | 0.576201625 | 0.651584542 |
| TRIM6     | -0.029511053 | 0.57623875  | 0.651589524 |
| LHX8      | 0.029503443  | 0.576337157 | 0.651663799 |
| PLCXD1    | 0.029498642  | 0.576399251 | 0.651697008 |
| TRPC7     | -0.029486384 | 0.576557789 | 0.651834974 |
| HOXA7     | -0.029484146 | 0.576586739 | 0.651834974 |

|           |              |             |             |
|-----------|--------------|-------------|-------------|
| HLA-G     | 0.02946149   | 0.57687983  | 0.652129296 |
| CYP2D7P1  | 0.029456071  | 0.576949946 | 0.652171539 |
| CACNG3    | 0.029452995  | 0.576989748 | 0.652179513 |
| SNORA5C   | -0.02944121  | 0.57714224  | 0.652314853 |
| HFE2      | 0.029426972  | 0.577326515 | 0.652486099 |
| FLJ10661  | 0.029408202  | 0.577569471 | 0.652722585 |
| CHST5     | -0.029405742 | 0.577601312 | 0.652722585 |
| MTHFD2L   | -0.029392193 | 0.577776726 | 0.652883766 |
| LOC144776 | 0.029370546  | 0.578057035 | 0.653163452 |
| CCL19     | -0.029357978 | 0.578219804 | 0.653310303 |
| SPTBN4    | -0.029329949 | 0.578582897 | 0.653683463 |
| MAP7D1    | -0.029319188 | 0.578722324 | 0.653803896 |
| CDS2      | -0.029295217 | 0.579032964 | 0.65411773  |
| TMEM117   | 0.029269969  | 0.579360231 | 0.654450312 |
| ADAT2     | 0.02924963   | 0.579623937 | 0.65471106  |
| GAPDHS    | 0.029245834  | 0.579673158 | 0.654729522 |
| MLNR      | -0.029231519 | 0.579858796 | 0.654902054 |
| HTN1      | 0.029221599  | 0.579987468 | 0.655004585 |
| DNMT3B    | 0.029217845  | 0.580036153 | 0.655004585 |
| NEUROG3   | 0.029216913  | 0.580048248 | 0.655004585 |
| ARR3      | 0.029169015  | 0.580669697 | 0.655669162 |
| TMEM45B   | 0.029156207  | 0.580835933 | 0.655819685 |
| KRT16     | -0.029148476 | 0.580936273 | 0.655895792 |
| PLEKHG2   | -0.029142973 | 0.581007712 | 0.655939262 |
| IGFBP3    | -0.029131015 | 0.581162945 | 0.656058477 |
| CLEC3A    | -0.029128564 | 0.581194776 | 0.656058477 |
| MBD3L2    | -0.029127226 | 0.581212137 | 0.656058477 |
| OPN1MW    | -0.029117454 | 0.581339029 | 0.656164518 |
| MT1L      | 0.029097037  | 0.581604156 | 0.656426567 |
| ABCC12    | 0.029008266  | 0.582757608 | 0.657678336 |
| VMA21     | 0.029006597  | 0.582779292 | 0.657678336 |
| LCP1      | -0.029003064 | 0.582825231 | 0.65769291  |
| OR10W1    | 0.028957712  | 0.583414947 | 0.658321076 |
| REG1P     | 0.028930771  | 0.583765404 | 0.658642508 |
| OR1I1     | 0.028930728  | 0.583765951 | 0.658642508 |
| SRY       | 0.028917705  | 0.583935396 | 0.658796363 |
| LIMK1     | -0.02891261  | 0.584001686 | 0.658815057 |
| STARD7    | 0.028911347  | 0.584018128 | 0.658815057 |
| PSAT1     | 0.028875096  | 0.584489924 | 0.65928435  |
| MASP2     | 0.028874295  | 0.584500351 | 0.65928435  |
| ZNF839    | -0.02886876  | 0.584572412 | 0.659328289 |
| AQP7      | -0.028846148 | 0.584866807 | 0.659622974 |
| PSEN2     | 0.028821853  | 0.585183202 | 0.659942435 |
| ZSCAN5B   | -0.028816045 | 0.585258851 | 0.659990375 |
| TPST2     | -0.028794942 | 0.585533748 | 0.660262986 |
| GLRA2     | 0.028779163  | 0.585739347 | 0.660457428 |



|           |              |             |             |
|-----------|--------------|-------------|-------------|
| GPR111    | 0.028767255  | 0.585894514 | 0.660594987 |
| ACAP1     | 0.028764116  | 0.585935429 | 0.660603717 |
| SIRPD     | -0.02875859  | 0.586007437 | 0.660634508 |
| GLRA4     | -0.028756929 | 0.586029085 | 0.660634508 |
| SPANXN4   | -0.028735803 | 0.586304451 | 0.66090752  |
| DECR1     | 0.028713638  | 0.586593429 | 0.661195842 |
| SLC2A6    | -0.028708383 | 0.586661952 | 0.661235655 |
| IPO5      | 0.028704421  | 0.586713625 | 0.661256471 |
| ATOH7     | 0.028693417  | 0.586857121 | 0.661354274 |
| ECT2L     | 0.028692673  | 0.58686682  | 0.661354274 |
| SERP2     | -0.028681599 | 0.587011257 | 0.661479612 |
| SPTBN5    | -0.02863506  | 0.587618418 | 0.662126333 |
| POC5      | 0.028602339  | 0.588045492 | 0.66257007  |
| INTS5     | 0.028598594  | 0.588094379 | 0.662587665 |
| CDHR4     | 0.028582641  | 0.588302649 | 0.662784819 |
| NOX4      | 0.028576851  | 0.588378255 | 0.662832501 |
| PNLIPRP3  | -0.028542272 | 0.588829833 | 0.663303701 |
| ZNF767    | -0.028528302 | 0.589012318 | 0.663471737 |
| ERP27     | 0.028501899  | 0.58935729  | 0.663822772 |
| C6orf191  | 0.028477116  | 0.589681177 | 0.664150019 |
| C19orf57  | -0.02846904  | 0.589786733 | 0.66423134  |
| KRT20     | 0.02846507   | 0.58983864  | 0.664252235 |
| OR10A7    | 0.028435587  | 0.590224098 | 0.664648737 |
| KIAA1377  | -0.028425953 | 0.590350077 | 0.664753013 |
| ZNF479    | 0.02841878   | 0.590443885 | 0.664821053 |
| HCN2      | -0.028415701 | 0.590484161 | 0.664828814 |
| PRSS41    | 0.028408608  | 0.590576921 | 0.664895663 |
| ABCC8     | -0.028391718 | 0.590797854 | 0.665093366 |
| FOLR3     | -0.028390078 | 0.590819319 | 0.665093366 |
| OR51Q1    | 0.028373944  | 0.591030398 | 0.6652597   |
| METAP2    | -0.028373677 | 0.591033888 | 0.6652597   |
| TAAR8     | 0.028369842  | 0.591084076 | 0.66527859  |
| ADAM2     | 0.028364363  | 0.59115577  | 0.665321681 |
| SERPINB10 | 0.028351006  | 0.591330566 | 0.665480799 |
| TCTE3     | 0.028346123  | 0.591394463 | 0.6655151   |
| SNORA2A   | -0.028334193 | 0.591550613 | 0.665653207 |
| BARHL1    | -0.028319299 | 0.591745579 | 0.665834975 |
| ZNF584    | -0.028310631 | 0.591859065 | 0.665889597 |
| GGNBP2    | -0.028310484 | 0.591860997 | 0.665889597 |
| PATE2     | -0.028291379 | 0.592111151 | 0.666133408 |
| CLDN8     | -0.028286985 | 0.592168698 | 0.666160516 |
| KIAA1539  | 0.028283715  | 0.59221152  | 0.666171059 |
| C13orf38  | -0.028278139 | 0.592284547 | 0.666204566 |
| CLU       | 0.028276332  | 0.592308212 | 0.666204566 |
| APBA3     | -0.028263445 | 0.592476997 | 0.666329391 |
| C7orf34   | 0.02826275   | 0.592486109 | 0.666329391 |

|           |              |             |             |
|-----------|--------------|-------------|-------------|
| TMEM86A   | -0.02825898  | 0.592535493 | 0.666347301 |
| SORCS1    | 0.028244473  | 0.592725545 | 0.666523389 |
| KLKP1     | -0.028239932 | 0.592785027 | 0.666552641 |
| AQP10     | 0.028234853  | 0.592851581 | 0.666567504 |
| TMCC1     | 0.028232709  | 0.592879671 | 0.666567504 |
| PPP1R14A  | -0.02823126  | 0.592898657 | 0.666567504 |
| GIN1      | -0.028199421 | 0.59331592  | 0.666978264 |
| SPEF2     | -0.02819827  | 0.593331003 | 0.666978264 |
| RPAP2     | -0.028195052 | 0.59337319  | 0.666988038 |
| MGAM      | -0.028136346 | 0.594142919 | 0.667815568 |
| B3GNT8    | 0.028121533  | 0.594337222 | 0.667973383 |
| LRRC37B   | -0.028120528 | 0.594350407 | 0.667973383 |
| OR2S2     | -0.028102261 | 0.594590052 | 0.668205004 |
| ZFATAS    | -0.028066664 | 0.595057172 | 0.668657676 |
| OR56A1    | 0.028066448  | 0.595060004 | 0.668657676 |
| PPP1R1A   | 0.028047778  | 0.595305066 | 0.668895305 |
| CD164L2   | 0.02804471   | 0.595345348 | 0.668898237 |
| WSB2      | 0.028042462  | 0.59537485  | 0.668898237 |
| TCTEX1D4  | -0.02795189  | 0.596564427 | 0.670196907 |
| FAM54B    | 0.027944472  | 0.596661901 | 0.670268601 |
| IFITM1    | 0.027908309  | 0.597137208 | 0.670764708 |
| LOC440896 | 0.027891581  | 0.597357119 | 0.670973887 |
| MYH4      | -0.027874381 | 0.597583281 | 0.671190065 |
| FLRT1     | -0.027808452 | 0.598450536 | 0.672126237 |
| GYLTL1B   | -0.027805042 | 0.598495412 | 0.672138732 |
| S100A12   | -0.027800796 | 0.598551282 | 0.672163572 |
| LCE2A     | -0.027766862 | 0.598997919 | 0.672627209 |
| LOC100133 | 0.027762661  | 0.599053226 | 0.672651387 |
| C5orf20   | 0.027756922  | 0.599128784 | 0.672698299 |
| EFNA5     | 0.027740773  | 0.59934141  | 0.672865913 |
| OR2F1     | 0.027740452  | 0.59934564  | 0.672865913 |
| LOC100192 | 0.027707499  | 0.599779621 | 0.673315172 |
| HTR6      | -0.027661407 | 0.60038687  | 0.673952181 |
| KRTAP10-2 | 0.027659292  | 0.600414742 | 0.673952181 |
| LOC285419 | -0.027645563 | 0.600595683 | 0.674117287 |
| OR52N1    | -0.027589774 | 0.601331184 | 0.674904786 |
| COMMD10   | -0.027569568 | 0.601597663 | 0.675165819 |
| MAPKAPK2  | 0.0275273    | 0.60215529  | 0.675753556 |
| MYO1G     | -0.027504886 | 0.602451081 | 0.676047404 |
| TTLL8     | 0.027497725  | 0.602545598 | 0.67611537  |
| PROM1     | -0.02748539  | 0.60270842  | 0.676250791 |
| KCTD19    | -0.027483162 | 0.602737838 | 0.676250791 |
| PKD2L1    | 0.027480865  | 0.602768154 | 0.676250791 |
| C10orf47  | 0.027441831  | 0.603283564 | 0.676790907 |
| OPRL1     | 0.027433357  | 0.603395477 | 0.676878327 |
| FZD2      | 0.027414241  | 0.603647974 | 0.677123432 |

|            |              |             |             |
|------------|--------------|-------------|-------------|
| DDX3Y      | 0.02740903   | 0.603716811 | 0.677162506 |
| DAZL       | -0.027399789 | 0.603838898 | 0.677242226 |
| CTAGE4     | -0.027398502 | 0.603855898 | 0.677242226 |
| LOC100129  | 0.027391312  | 0.603950905 | 0.677310636 |
| C4orf14    | 0.027375808  | 0.604155775 | 0.677502239 |
| SNORA54    | 0.027371608  | 0.604211272 | 0.677526322 |
| COL9A3     | -0.027363326 | 0.604320733 | 0.677610911 |
| ZNF669     | -0.02735566  | 0.604422056 | 0.677686367 |
| ARSA       | 0.027314763  | 0.604962713 | 0.678254373 |
| OR2H1      | 0.027288728  | 0.605307019 | 0.678602189 |
| OR11G2     | 0.02726797   | 0.605581588 | 0.678871789 |
| CACNA2D4   | -0.027244066 | 0.605897851 | 0.679188095 |
| PPP1R9A    | 0.027236058  | 0.606003818 | 0.679268646 |
| TMEM57     | 0.027232404  | 0.606052175 | 0.679284616 |
| WNT10B     | 0.027207014  | 0.606388211 | 0.679623007 |
| ADH6       | 0.027203099  | 0.606440041 | 0.679642849 |
| C2orf49    | 0.027195397  | 0.606541989 | 0.679718851 |
| PNMT       | 0.027188939  | 0.606627493 | 0.679739992 |
| SLC5A12    | 0.027188816  | 0.606629118 | 0.679739992 |
| OR5A1      | -0.027181289 | 0.606728763 | 0.679813397 |
| CCRL2      | 0.027153425  | 0.607097741 | 0.680188552 |
| ITGB5      | 0.027148811  | 0.607158852 | 0.680218752 |
| TTY6B      | -0.027140495 | 0.607268992 | 0.680303875 |
| RAET1G     | -0.0271343   | 0.607351054 | 0.680357534 |
| CCDC83     | 0.027061946  | 0.608309785 | 0.681393182 |
| PCOLCE     | -0.027015317 | 0.608928015 | 0.682047324 |
| NEDD4L     | 0.027009522  | 0.609004857 | 0.68209503  |
| RP1-177G6. | -0.026985867 | 0.609318616 | 0.682359535 |
| CYB561D1   | 0.026984362  | 0.609338572 | 0.682359535 |
| KLHL25     | -0.026983968 | 0.60934381  | 0.682359535 |
| TRAFD1     | 0.026974643  | 0.60946751  | 0.682459683 |
| CDY2B      | -0.02696342  | 0.609616403 | 0.682588028 |
| MICALL2    | -0.026922561 | 0.610158634 | 0.683156754 |
| NCR2       | 0.026915253  | 0.610255631 | 0.683226944 |
| SPIB       | 0.026909149  | 0.610336657 | 0.683279247 |
| OR1L4      | 0.026833316  | 0.611343704 | 0.684368177 |
| LOR        | -0.026829782 | 0.611390651 | 0.684382261 |
| ADO        | 0.026809483  | 0.611660349 | 0.684645675 |
| SPRR2D     | 0.026798061  | 0.611812128 | 0.684777076 |
| DUOXA2     | 0.026792887  | 0.61188089  | 0.684815551 |
| C10orf27   | -0.026786005 | 0.611972354 | 0.684879429 |
| KRT32      | -0.026761406 | 0.612299319 | 0.685206841 |
| YWHAQ      | 0.026735534  | 0.612643296 | 0.685553252 |
| C1orf59    | -0.026725679 | 0.612774355 | 0.685628549 |
| ZNF8       | -0.026725296 | 0.61277944  | 0.685628549 |
| IKBKAP     | 0.026676633  | 0.613426726 | 0.686314227 |

|           |              |             |             |
|-----------|--------------|-------------|-------------|
| XKRX      | 0.02663536   | 0.613975949 | 0.68689012  |
| TBC1D20   | -0.026621577 | 0.614159416 | 0.687036671 |
| OR2H2     | 0.026620335  | 0.614175941 | 0.687036671 |
| TRIM8     | 0.026600321  | 0.614442388 | 0.687296122 |
| CHST6     | -0.026588251 | 0.614603104 | 0.687437283 |
| SOX13     | -0.026576829 | 0.614755203 | 0.68756879  |
| HOXB8     | 0.026568148  | 0.614870802 | 0.687659461 |
| POLR2C    | 0.026560288  | 0.614975496 | 0.687737927 |
| SLC8A2    | 0.026537207  | 0.615282943 | 0.688038088 |
| SFTPA1    | -0.026534951 | 0.615312997 | 0.688038088 |
| SNORA1    | -0.026528626 | 0.615397276 | 0.688093692 |
| DPRX      | 0.026516678  | 0.615556469 | 0.68823305  |
| RALYL     | 0.026503561  | 0.615731251 | 0.68838982  |
| RAX       | 0.026485815  | 0.615967765 | 0.68855083  |
| SYCN      | 0.026485707  | 0.615969204 | 0.68855083  |
| CELP      | 0.026484973  | 0.61597899  | 0.68855083  |
| WDR55     | 0.026467087  | 0.616217408 | 0.688778676 |
| NKX2-6    | -0.026462055 | 0.616284485 | 0.688814991 |
| C1orf201  | 0.02645533   | 0.61637414  | 0.688876536 |
| IGFL2     | -0.026439647 | 0.616583256 | 0.689058153 |
| PISD      | -0.026437953 | 0.616605842 | 0.689058153 |
| IPO11     | -0.02641456  | 0.616917818 | 0.689368103 |
| ACRBP     | 0.026411786  | 0.616954811 | 0.689370761 |
| LOC153328 | 0.026406975  | 0.617018989 | 0.689403791 |
| KCNMB2    | 0.026393186  | 0.617202922 | 0.689570614 |
| C9orf6    | -0.026381476 | 0.617359143 | 0.689706459 |
| SNORA56   | -0.026362307 | 0.61761491  | 0.689953493 |
| USP22     | 0.026347159  | 0.617817066 | 0.690140615 |
| MAGEF1    | 0.02633886   | 0.617927832 | 0.690204269 |
| PRO1768   | 0.026337696  | 0.617943365 | 0.690204269 |
| CLCNKA    | 0.026317714  | 0.618210096 | 0.690463466 |
| DCP1B     | -0.026312732 | 0.618276606 | 0.690499024 |
| DDR1      | -0.026304045 | 0.618392582 | 0.690589821 |
| ZNF878    | -0.026291352 | 0.618562065 | 0.690740357 |
| RAMP2     | 0.026285349  | 0.618642222 | 0.690791133 |
| APCDD1    | -0.026276401 | 0.618761725 | 0.690853557 |
| EBF4      | 0.026275968  | 0.618767507 | 0.690853557 |
| C9        | -0.026272208 | 0.61881772  | 0.690870888 |
| CRABP1    | -0.026240354 | 0.61924321  | 0.691307166 |
| MGC16142  | 0.026233235  | 0.619338322 | 0.691340694 |
| MLKL      | -0.026231413 | 0.619362655 | 0.691340694 |
| HIST3H2A  | -0.026229176 | 0.619392544 | 0.691340694 |
| C9orf171  | -0.026227712 | 0.619412102 | 0.691340694 |
| CSTT      | -0.026217507 | 0.619548459 | 0.691446243 |
| FCHO1     | -0.026214416 | 0.61958976  | 0.691446243 |
| SPAG16    | 0.02621284   | 0.619610829 | 0.691446243 |

|           |              |             |             |
|-----------|--------------|-------------|-------------|
| ST13      | 0.026186343  | 0.619964952 | 0.691789099 |
| C9orf79   | -0.026182491 | 0.620016429 | 0.691789099 |
| SNAPC5    | -0.026182054 | 0.620022276 | 0.691789099 |
| GALNT6    | -0.026172858 | 0.620145194 | 0.691887481 |
| A4GNT     | -0.026157495 | 0.620350584 | 0.69207786  |
| ANKLE2    | 0.026154139  | 0.620395462 | 0.692089156 |
| ME1       | -0.026144936 | 0.620518506 | 0.692187646 |
| DEFB124   | -0.026141704 | 0.620561725 | 0.692197085 |
| LOC284632 | 0.026127419  | 0.620752758 | 0.69236513  |
| PPBPL2    | 0.026125239  | 0.620781912 | 0.69236513  |
| ADCY8     | 0.026116822  | 0.620894482 | 0.692451902 |
| GPR162    | -0.026105309 | 0.621048474 | 0.692584856 |
| RAP1B     | 0.026097428  | 0.621153898 | 0.692663636 |
| LYPD6B    | -0.026076934 | 0.621428082 | 0.692930585 |
| SMCR7     | 0.026068583  | 0.621539812 | 0.693016368 |
| 43900     | -0.026030793 | 0.622045566 | 0.693508818 |
| ZBTB42    | -0.026030379 | 0.622051118 | 0.693508818 |
| ATAD3C    | 0.026015241  | 0.622253754 | 0.693680893 |
| UGGT1     | -0.026013645 | 0.622275127 | 0.693680893 |
| SMU1      | 0.026000526  | 0.622450772 | 0.693837855 |
| ZNF85     | 0.025973841  | 0.622808109 | 0.694197318 |
| PNKD      | 0.025961507  | 0.622973304 | 0.694342587 |
| LOC723972 | 0.025953947  | 0.623074562 | 0.694416582 |
| AIFM1     | -0.025928428 | 0.623416434 | 0.694758718 |
| GABRE     | 0.025916967  | 0.623570007 | 0.694883838 |
| GSN       | -0.025914841 | 0.623598491 | 0.694883838 |
| PRPH2     | -0.025908227 | 0.623687124 | 0.694943718 |
| CHIT1     | -0.025903361 | 0.623752329 | 0.694951362 |
| CLDN2     | 0.025902507  | 0.623763776 | 0.694951362 |
| STC2      | -0.025884526 | 0.624004766 | 0.695180965 |
| LCE1B     | -0.025860963 | 0.624320638 | 0.695482797 |
| FAM170B   | -0.025859106 | 0.624345541 | 0.695482797 |
| NFE2L3    | -0.025845004 | 0.624534614 | 0.695654502 |
| PI3       | 0.025827428  | 0.62477031  | 0.695878116 |
| HIFNT     | 0.025819926  | 0.62487092  | 0.695951253 |
| LOC256880 | 0.025814575  | 0.624942688 | 0.695992262 |
| C8orf84   | 0.02579367   | 0.625223092 | 0.696265609 |
| PRSS12    | 0.025774024  | 0.625486678 | 0.696520197 |
| INSRR     | -0.025736912 | 0.625984703 | 0.697035804 |
| C11orf35  | -0.025731548 | 0.6260567   | 0.697076997 |
| C3orf39   | 0.02571526   | 0.62627535  | 0.697281467 |
| OR2L2     | 0.025712563  | 0.626311556 | 0.697282796 |
| MTFMT     | -0.025707744 | 0.626376253 | 0.697315841 |
| OR52L1    | 0.025702369  | 0.626448413 | 0.697338415 |
| ZNF525    | -0.025701018 | 0.626466562 | 0.697338415 |
| ZIM3      | 0.025689961  | 0.626615027 | 0.697464691 |

|           |              |             |             |
|-----------|--------------|-------------|-------------|
| STK40     | -0.025686413 | 0.626662659 | 0.697478727 |
| FASTKD3   | 0.025628153  | 0.627445203 | 0.698302148 |
| TRPC1     | -0.025624733 | 0.62749115  | 0.698302148 |
| FOXE1     | -0.025623504 | 0.62750767  | 0.698302148 |
| 43893     | 0.025610638  | 0.627680543 | 0.698437469 |
| SSTR2     | 0.025608047  | 0.627715363 | 0.698437469 |
| ELMOD3    | 0.025606624  | 0.627734484 | 0.698437469 |
| C5orf47   | 0.025561906  | 0.628335536 | 0.699067163 |
| SYPL2     | -0.025519778 | 0.628901985 | 0.699658289 |
| LOC100240 | -0.025513067 | 0.628992243 | 0.699719613 |
| PRG3      | 0.025491201  | 0.629286363 | 0.700007704 |
| WDHD1     | -0.02548738  | 0.629337773 | 0.70002579  |
| ZFYVE27   | -0.025476696 | 0.62948151  | 0.700146566 |
| DNAJB8    | -0.025423424 | 0.630198402 | 0.70090479  |
| OSTN      | 0.025400235  | 0.630510571 | 0.701212823 |
| BRP44L    | -0.025387225 | 0.630685741 | 0.701368468 |
| CA14      | 0.025381613  | 0.6307613   | 0.701413328 |
| UBE2Q2    | 0.025360086  | 0.631051213 | 0.701666303 |
| SLC13A2   | 0.025359488  | 0.631059259 | 0.701666303 |
| SLC9A4    | -0.025321932 | 0.63156517  | 0.702158093 |
| TTC21A    | 0.025321419  | 0.631572077 | 0.702158093 |
| TRIM77    | 0.025296594  | 0.631906588 | 0.702490773 |
| LOC91316  | 0.025260472  | 0.632393446 | 0.702962112 |
| SLC45A2   | 0.025259519  | 0.632406287 | 0.702962112 |
| SNHG4     | -0.025257281 | 0.632436463 | 0.702962112 |
| LOC113230 | -0.025236742 | 0.63271336  | 0.703230638 |
| TMEM211   | 0.025224136  | 0.632883352 | 0.703380321 |
| UAP1L1    | 0.025213789  | 0.633022887 | 0.703496138 |
| MYL1      | -0.025209455 | 0.633081337 | 0.703521836 |
| DEFB118   | 0.025205744  | 0.633131378 | 0.703538187 |
| WBSCR28   | 0.025200471  | 0.633202499 | 0.70357796  |
| FAM60A    | -0.025154176 | 0.633827045 | 0.704225518 |
| OR6S1     | -0.025152029 | 0.633856009 | 0.704225518 |
| ADAM7     | 0.025132892  | 0.634114256 | 0.704473134 |
| C20orf141 | 0.025129892  | 0.634154753 | 0.704478826 |
| CEP78     | -0.025124667 | 0.63422527  | 0.704517863 |
| C9orf95   | -0.025120295 | 0.634284278 | 0.704544113 |
| APOL2     | 0.025092249  | 0.634662882 | 0.704925337 |
| GNMT      | 0.025080574  | 0.634820503 | 0.705061085 |
| CACNA1G   | 0.025076815  | 0.634871258 | 0.705078134 |
| CBLN4     | -0.025070066 | 0.634962399 | 0.705140031 |
| ACSL4     | 0.025055283  | 0.635162034 | 0.705322399 |
| IFITM4P   | 0.025044994  | 0.635300986 | 0.705403469 |
| HTR5A     | -0.025044632 | 0.635305881 | 0.705403469 |
| RND1      | -0.02503707  | 0.63540802  | 0.705477545 |
| OLFML2B   | -0.025033211 | 0.635460146 | 0.705496087 |

|           |              |             |             |
|-----------|--------------|-------------|-------------|
| PIPOX     | 0.024982894  | 0.636139985 | 0.706211483 |
| PRB1      | -0.024956286 | 0.636499611 | 0.706571335 |
| SOX2      | 0.024951768  | 0.636560678 | 0.706599738 |
| NPY2R     | 0.024933118  | 0.636812803 | 0.706840206 |
| LSR       | 0.02492903   | 0.636868081 | 0.706862166 |
| SPATA19   | 0.024915477  | 0.637051329 | 0.707026149 |
| FAM193B   | 0.024907758  | 0.63715571  | 0.707102589 |
| KRTAP10-7 | -0.024892804 | 0.637357952 | 0.707287619 |
| NCRNA0005 | -0.024886602 | 0.637441835 | 0.707317748 |
| FLJ37307  | 0.024885545  | 0.637456135 | 0.707317748 |
| SSTR3     | 0.024881428  | 0.637511823 | 0.707340127 |
| HBA2      | 0.024875523  | 0.637591695 | 0.707389338 |
| CD244     | -0.024858551 | 0.637821291 | 0.707604646 |
| C21orf128 | 0.02484913   | 0.63794875  | 0.707706626 |
| PRRT4     | -0.024836537 | 0.638119143 | 0.707856221 |
| SPRR1A    | -0.024801882 | 0.638588162 | 0.708334062 |
| MYCBPAP   | 0.024797143  | 0.638652308 | 0.708334062 |
| PIP       | 0.024796825  | 0.638656611 | 0.708334062 |
| SLC6A10P  | 0.024791638  | 0.638726818 | 0.708348353 |
| ACSS1     | -0.024790618 | 0.638740634 | 0.708348353 |
| FOLR4     | 0.024787827  | 0.63877841  | 0.708350801 |
| PRSS48    | -0.024771127 | 0.639004512 | 0.708562075 |
| TOX4      | 0.024766563  | 0.639066304 | 0.708591139 |
| DMP1      | -0.024759929 | 0.639156125 | 0.708651277 |
| IFT122    | 0.024740702  | 0.639416503 | 0.708900499 |
| MYLK3     | -0.024731794 | 0.63953715  | 0.708994786 |
| GNAS      | 0.024727336  | 0.639597531 | 0.709022256 |
| BTNL8     | 0.024724642  | 0.639634024 | 0.709023243 |
| PIGS      | 0.024702402  | 0.639935291 | 0.709317711 |
| TMEM136   | 0.02468556   | 0.640163474 | 0.709531143 |
| PLA2G2A   | -0.024654601 | 0.640583016 | 0.709936522 |
| MFRP      | 0.024650681  | 0.640636149 | 0.709936522 |
| FADS1     | 0.02465068   | 0.640636165 | 0.709936522 |
| SNORA5A   | 0.024634942  | 0.640849496 | 0.710133414 |
| LY6E      | 0.024627182  | 0.640954684 | 0.710165319 |
| DPPA2     | 0.024625851  | 0.640972728 | 0.710165319 |
| SPATA7    | 0.024624926  | 0.640985268 | 0.710165319 |
| CDCP1     | -0.024610183 | 0.641185155 | 0.710347261 |
| CDK2AP1   | 0.02455845   | 0.641886742 | 0.711084967 |
| PRLH      | -0.024553689 | 0.641951329 | 0.711111696 |
| PLK5P     | 0.024540706  | 0.64212746  | 0.711272505 |
| NRAS      | -0.024522018 | 0.642381019 | 0.711513793 |
| HDGFL1    | 0.024517344  | 0.642444445 | 0.711544471 |
| CCDC138   | 0.024510631  | 0.64253555  | 0.711605799 |
| ESPNL     | 0.02449717   | 0.642718227 | 0.711733613 |
| MAP3K14   | -0.02449686  | 0.642722435 | 0.711733613 |

|           |              |             |             |
|-----------|--------------|-------------|-------------|
| GUCY2E    | 0.024448803  | 0.643374818 | 0.71241643  |
| SIAH3     | 0.024434377  | 0.643570699 | 0.71259371  |
| C21orf94  | -0.024430304 | 0.643626011 | 0.712615334 |
| ATF6B     | 0.024426782  | 0.643673835 | 0.712626915 |
| KLK13     | -0.024424264 | 0.643708038 | 0.712626915 |
| LHFPL1    | -0.024414075 | 0.643846415 | 0.712740487 |
| MAGEE2    | 0.024373696  | 0.644394944 | 0.71330806  |
| EIF5A2    | 0.02434714   | 0.6447558   | 0.713667838 |
| C14orf48  | 0.02434426   | 0.644794935 | 0.713671491 |
| TMEM102   | -0.02430276  | 0.645359028 | 0.714256143 |
| OAZ2      | -0.024292347 | 0.64550061  | 0.71437314  |
| OR13F1    | -0.02428304  | 0.645627156 | 0.714473484 |
| C20orf151 | 0.024246458  | 0.646124651 | 0.714984299 |
| CCDC151   | 0.024232815  | 0.646310242 | 0.715149931 |
| PI4K2A    | 0.024208346  | 0.646643141 | 0.715478535 |
| ZNF606    | 0.024199077  | 0.646769252 | 0.715578315 |
| CCDC136   | -0.024184436 | 0.64696849  | 0.715758984 |
| OR2F2     | 0.024174023  | 0.64711021  | 0.715876004 |
| IER2      | -0.02415108  | 0.647422513 | 0.716181711 |
| OR6K3     | -0.024144099 | 0.647517537 | 0.716239788 |
| CLCA1     | -0.024141939 | 0.647546944 | 0.716239788 |
| POLDIP3   | -0.024125232 | 0.647774412 | 0.716451594 |
| NTRK1     | -0.024111405 | 0.647962694 | 0.716620039 |
| SLC12A8   | -0.024103829 | 0.648065873 | 0.71669435  |
| MS4A12    | -0.024100958 | 0.648104966 | 0.716697784 |
| KIAA1841  | 0.024064897  | 0.648596149 | 0.717201127 |
| ENO2      | 0.024044492  | 0.64887416  | 0.717432957 |
| SLC7A7    | -0.024044221 | 0.648877852 | 0.717432957 |
| PPP2R5A   | 0.024005256  | 0.649408864 | 0.71798021  |
| KIAA1324  | 0.023973357  | 0.649843711 | 0.71842109  |
| KCNQ2     | 0.023941294  | 0.650280908 | 0.718864518 |
| RIPK1     | -0.023936687 | 0.650343746 | 0.718894077 |
| PGLYRP3   | -0.023923046 | 0.650529785 | 0.7190209   |
| SNORA58   | -0.02392298  | 0.650530684 | 0.7190209   |
| IZUMO1    | 0.023910686  | 0.650698388 | 0.719166346 |
| RNASE3    | -0.023906133 | 0.65076049  | 0.71919507  |
| CCDC69    | 0.023898899  | 0.650859184 | 0.719249944 |
| KCNA7     | -0.023897199 | 0.650882375 | 0.719249944 |
| C12orf59  | -0.023892949 | 0.65094036  | 0.719274109 |
| TERF1     | -0.023873384 | 0.651207314 | 0.719529164 |
| SCMH1     | -0.023839957 | 0.651663504 | 0.71999327  |
| OR2K2     | 0.023837237  | 0.651700631 | 0.719994345 |
| FETUB     | -0.023825723 | 0.651857803 | 0.720071882 |
| AQP8      | -0.023825478 | 0.651861151 | 0.720071882 |
| EMR1      | -0.023824149 | 0.651879285 | 0.720071882 |
| FAM25B    | 0.023801703  | 0.652185733 | 0.720370431 |



|           |              |             |             |
|-----------|--------------|-------------|-------------|
| HIST1H2BC | 0.02377377   | 0.65256717  | 0.720751771 |
| NLRP9     | -0.023766861 | 0.652661533 | 0.720816018 |
| PGPEP1L   | -0.023760699 | 0.652745688 | 0.720843772 |
| ZNF529    | -0.023758256 | 0.652779053 | 0.720843772 |
| MMP7      | -0.023757071 | 0.652795251 | 0.720843772 |
| NBPF22P   | -0.023734714 | 0.653100643 | 0.721141013 |
| GCLC      | -0.023699771 | 0.653578097 | 0.721628197 |
| NUCB2     | 0.023692166  | 0.653682031 | 0.721702941 |
| C1orf69   | 0.023681763  | 0.65382421  | 0.721819898 |
| CALHM1    | -0.023673742 | 0.653933838 | 0.721885408 |
| CLTCL1    | -0.023672117 | 0.653956045 | 0.721885408 |
| SNORA15   | -0.02366071  | 0.654111979 | 0.722017519 |
| SEZ6L     | 0.023646805  | 0.654302068 | 0.722187313 |
| KRT79     | 0.023629432  | 0.654539607 | 0.722409459 |
| LOC283999 | -0.023588962 | 0.655093083 | 0.722980258 |
| CYP1A1    | 0.02358501   | 0.655147135 | 0.722999845 |
| NTN5      | -0.023548533 | 0.655646183 | 0.723510485 |
| NPAS4     | -0.023525637 | 0.655959504 | 0.723816131 |
| ZNF735    | -0.02352023  | 0.656033496 | 0.72385767  |
| XKR3      | -0.023475245 | 0.656649299 | 0.724496996 |
| FOXI1     | 0.023449336  | 0.657004068 | 0.724848264 |
| C15orf62  | 0.023443938  | 0.657077995 | 0.724889667 |
| OR2A2     | -0.023412551 | 0.657507901 | 0.725323761 |
| C14orf64  | 0.023356644  | 0.658273934 | 0.72612858  |
| LRP8      | -0.023345429 | 0.65842765  | 0.726257915 |
| MT1X      | -0.023340134 | 0.658500218 | 0.726289123 |
| C1orf129  | -0.023335872 | 0.658558637 | 0.726289123 |
| C8orf40   | 0.023335383  | 0.658565352 | 0.726289123 |
| C1orf89   | -0.023328183 | 0.658664044 | 0.72635774  |
| SDCBP2    | -0.023321805 | 0.658751475 | 0.726400278 |
| OSCAR     | 0.023318139  | 0.658801739 | 0.726400278 |
| C21orf49  | 0.023317387  | 0.658812042 | 0.726400278 |
| SNORA22   | 0.023312967  | 0.658872649 | 0.726426884 |
| KRT12     | -0.023303444 | 0.659003213 | 0.72650245  |
| BMP2      | 0.023302646  | 0.659014148 | 0.72650245  |
| TLX1NB    | 0.023280239  | 0.659321413 | 0.726800949 |
| VPREB1    | -0.023272105 | 0.659432957 | 0.726862766 |
| CCIN      | -0.023270827 | 0.659450487 | 0.726862766 |
| HPRT1     | 0.023239898  | 0.659874725 | 0.727290119 |
| PRAMEF16  | -0.023234885 | 0.659943503 | 0.72732567  |
| DDX25     | 0.023226407  | 0.660059821 | 0.72741361  |
| ALPK3     | -0.023223156 | 0.660104415 | 0.7274225   |
| ZWILCH    | 0.02318518   | 0.660625551 | 0.727956501 |
| FAM7A3    | -0.023165803 | 0.660891505 | 0.728209268 |
| DIRAS1    | 0.023157332  | 0.661007795 | 0.728297109 |
| RAB26     | 0.023142409  | 0.661212675 | 0.728482542 |

|           |              |             |             |
|-----------|--------------|-------------|-------------|
| GSTM2     | 0.023136668  | 0.66129149  | 0.728529071 |
| HLA-DQA1  | -0.023121374 | 0.661501501 | 0.728720123 |
| RXRG      | 0.023108723  | 0.661675221 | 0.728871177 |
| GRB14     | 0.023085245  | 0.661997688 | 0.72918606  |
| SNORA71C  | 0.023079912  | 0.662070946 | 0.729226419 |
| MX2       | -0.023075699 | 0.662128811 | 0.729249821 |
| FAM47A    | 0.023070115  | 0.662205521 | 0.729293975 |
| LOC100128 | -0.023055115 | 0.662411606 | 0.729480597 |
| CNTN6     | -0.023049556 | 0.66248798  | 0.729524364 |
| AZU1      | -0.023025098 | 0.662824069 | 0.729854104 |
| KRTAP7-1  | 0.023019101  | 0.662906493 | 0.729904506 |
| UBIAD1    | -0.023002556 | 0.663133891 | 0.73011452  |
| INSL6     | -0.022994125 | 0.663249784 | 0.730201749 |
| CPSF6     | -0.022986613 | 0.663353046 | 0.730263503 |
| C21orf84  | 0.02298471   | 0.663379213 | 0.730263503 |
| TAS2R13   | -0.022980809 | 0.663432841 | 0.730282171 |
| STK33     | 0.022977376  | 0.663480037 | 0.730293757 |
| LY6K      | 0.022956758  | 0.663763526 | 0.730565415 |
| FLJ45983  | 0.022950665  | 0.6638473   | 0.730617241 |
| PRHOXNB   | 0.022946085  | 0.663910279 | 0.730646177 |
| CDS1      | -0.022915686 | 0.664328379 | 0.731065904 |
| GCG       | 0.022898496  | 0.66456485  | 0.731285722 |
| STIL      | 0.022887046  | 0.664722375 | 0.731418647 |
| RAB38     | -0.022860166 | 0.665092242 | 0.731785194 |
| FGG       | 0.022813469  | 0.665734971 | 0.732451906 |
| FLJ33630  | -0.022790303 | 0.66605392  | 0.732762337 |
| EPN3      | -0.022731932 | 0.666857841 | 0.733606247 |
| NR1D1     | -0.022704055 | 0.667241905 | 0.73398821  |
| STAR      | 0.022654333  | 0.667927157 | 0.734701426 |
| SULT1E1   | -0.022637731 | 0.668156027 | 0.734912586 |
| BTN2A2    | -0.02263056  | 0.668254889 | 0.734980732 |
| ZNF250    | 0.022625906  | 0.668319056 | 0.735010714 |
| RPH3A     | 0.022619344  | 0.668409532 | 0.735051186 |
| SNORA75   | 0.022617883  | 0.668429675 | 0.735051186 |
| ZDHHC14   | 0.02258812   | 0.668840113 | 0.73546192  |
| NKD1      | 0.022569629  | 0.669095156 | 0.735701747 |
| GPRC5D    | -0.02255072  | 0.669356001 | 0.735947925 |
| MUC20     | -0.022544387 | 0.66944337  | 0.736003352 |
| SHISA4    | -0.022526608 | 0.66968869  | 0.736232418 |
| PLXNA3    | -0.022518755 | 0.669797052 | 0.736305368 |
| SNORA61   | 0.02251644   | 0.669828991 | 0.736305368 |
| MATN3     | 0.022506742  | 0.669962838 | 0.736411851 |
| SLC4A9    | 0.022458884  | 0.670623445 | 0.737097297 |
| LOC642587 | -0.022452    | 0.670718486 | 0.737161073 |
| RGS21     | -0.022435057 | 0.670952426 | 0.737377493 |
| ITGAL     | 0.02237223   | 0.671820219 | 0.738283294 |

|           |              |             |             |
|-----------|--------------|-------------|-------------|
| FAM69A    | -0.022369212 | 0.671861906 | 0.738283294 |
| DNAJC15   | 0.022366693  | 0.671896711 | 0.738283294 |
| OLFM3     | -0.022363927 | 0.671934937 | 0.738283294 |
| GSDMC     | 0.022361969  | 0.671961988 | 0.738283294 |
| TCTN2     | -0.022339099 | 0.672278003 | 0.738554769 |
| CCDC102A  | -0.02233872  | 0.672283247 | 0.738554769 |
| ZNF438    | -0.022325901 | 0.672460402 | 0.738708639 |
| CCL14-CCL | -0.022301338 | 0.672799912 | 0.73904083  |
| ASB9      | -0.022273618 | 0.673183156 | 0.739421022 |
| ELOVL4    | -0.022266593 | 0.673280282 | 0.73948692  |
| BSN       | 0.022258514  | 0.673392    | 0.739568835 |
| LRP1B     | -0.022236251 | 0.673699882 | 0.739866171 |
| C1orf9    | 0.022232135  | 0.673756808 | 0.739887887 |
| TNS4      | 0.022133997  | 0.675114706 | 0.741319518 |
| ABCC2     | -0.022132536 | 0.675134928 | 0.741319518 |
| ZNF383    | -0.022120197 | 0.675305738 | 0.741466191 |
| LOC153684 | 0.022101972  | 0.675558054 | 0.741702334 |
| BMP4      | -0.022075485 | 0.675924806 | 0.742001948 |
| CHML      | 0.022075258  | 0.675927955 | 0.742001948 |
| ZNF93     | -0.022074192 | 0.675942724 | 0.742001948 |
| HGC6.3    | 0.022067579  | 0.676034296 | 0.742061567 |
| ADORA2A   | -0.022055765 | 0.676197921 | 0.742200264 |
| CETP      | 0.022045964  | 0.676333672 | 0.742308353 |
| LOC100130 | -0.022023358 | 0.676646832 | 0.742611136 |
| OR8K3     | -0.02201096  | 0.676818598 | 0.742742596 |
| DRD5      | -0.022006785 | 0.676876451 | 0.742742596 |
| ERF       | -0.022006637 | 0.676878502 | 0.742742596 |
| GNG13     | 0.022003578  | 0.676920879 | 0.742748171 |
| C20orf195 | -0.021995277 | 0.677035907 | 0.742798998 |
| KCNH4     | -0.021994852 | 0.677041798 | 0.742798998 |
| ADAMTS14  | -0.021964559 | 0.677461621 | 0.743186863 |
| HAGH      | 0.021963957  | 0.677469962 | 0.743186863 |
| ORAOV1    | 0.021952825  | 0.677624272 | 0.743315196 |
| ATOH1     | 0.021947536  | 0.677697586 | 0.743354672 |
| TFB2M     | 0.021934877  | 0.67787308  | 0.743506217 |
| TM2D2     | -0.021927065 | 0.677981378 | 0.743584048 |
| LOC100131 | -0.021911895 | 0.678191718 | 0.74377378  |
| FAM74A1   | -0.021889204 | 0.678506376 | 0.74407789  |
| TEDDM1    | 0.021876882  | 0.678677271 | 0.744224319 |
| GBAS      | 0.021873736  | 0.67872091  | 0.744231192 |
| RNF34     | -0.021828659 | 0.679346259 | 0.744875888 |
| SLC25A18  | 0.021807055  | 0.67964604  | 0.745163559 |
| APOBEC3G  | -0.021797219 | 0.679782542 | 0.74527219  |
| NODAL     | -0.021759931 | 0.680300121 | 0.745798575 |
| OXGR1     | -0.021734181 | 0.680657628 | 0.746149428 |
| GJA8      | -0.021729092 | 0.680728292 | 0.746185817 |

|           |              |             |             |
|-----------|--------------|-------------|-------------|
| ELP3      | -0.021705914 | 0.681050168 | 0.746489106 |
| SARDH     | -0.021703771 | 0.681079943 | 0.746489106 |
| TGIF2LY   | 0.021694949  | 0.68120247  | 0.746582311 |
| NRSN1     | 0.021682401  | 0.681376765 | 0.74673224  |
| SARM1     | -0.021672586 | 0.68151311  | 0.746840565 |
| ITLN1     | -0.021660932 | 0.68167501  | 0.74697688  |
| SGSM1     | -0.021651128 | 0.681811218 | 0.747077735 |
| FRG2B     | -0.021648908 | 0.681842075 | 0.747077735 |
| LOC339047 | 0.021640044  | 0.681965239 | 0.747171576 |
| CTHRC1    | -0.021635503 | 0.682028331 | 0.747199593 |
| ECHDC1    | -0.021630768 | 0.682094132 | 0.747230576 |
| CTRB2     | 0.021623821  | 0.682190673 | 0.747295228 |
| SOSTDC1   | 0.021614995  | 0.682313332 | 0.747388483 |
| CENPI     | 0.021600865  | 0.682509731 | 0.747562495 |
| S1PR5     | -0.021594169 | 0.68260281  | 0.747623327 |
| ZNF804B   | 0.021563968  | 0.683022666 | 0.748042036 |
| FBXO25    | 0.021559982  | 0.683078078 | 0.748061585 |
| C10orf10  | 0.021550855  | 0.683204984 | 0.748159422 |
| SLAMF7    | 0.021515533  | 0.683696209 | 0.748656183 |
| LOC100133 | -0.021481494 | 0.684169715 | 0.749133488 |
| C4orf26   | 0.021471813  | 0.684304404 | 0.749239772 |
| FAM20C    | 0.021463141  | 0.684425059 | 0.749330679 |
| FAM75A3   | 0.021455316  | 0.684533943 | 0.749408689 |
| C4orf46   | -0.021429232 | 0.684896944 | 0.749726105 |
| TMEM8C    | -0.021429072 | 0.684899173 | 0.749726105 |
| MC1R      | 0.021405006  | 0.685234153 | 0.750051565 |
| LOC284749 | 0.021393908  | 0.685388658 | 0.750155339 |
| ProSAPiP1 | -0.021392785 | 0.685404296 | 0.750155339 |
| C2orf85   | -0.021379786 | 0.685585266 | 0.750312171 |
| ITPK1     | 0.021372337  | 0.685688982 | 0.750384442 |
| C11orf53  | -0.021351853 | 0.685974236 | 0.750655361 |
| ATP5B     | 0.021329665  | 0.686283253 | 0.750952251 |
| KHSRP     | 0.021322957  | 0.686376695 | 0.751013234 |
| SBK2      | -0.021313228 | 0.686512217 | 0.751120251 |
| BTG1      | -0.021310007 | 0.686557088 | 0.751128079 |
| DRAM1     | 0.021291586  | 0.686813718 | 0.751367567 |
| BEND2     | 0.021282954  | 0.686933983 | 0.751457856 |
| TBC1D3G   | -0.021265248 | 0.68718071  | 0.751686468 |
| SPO11     | 0.021262378  | 0.687220715 | 0.75168894  |
| IRX6      | -0.021257548 | 0.687288027 | 0.751721279 |
| DRP2      | 0.021250251  | 0.687389712 | 0.751771442 |
| PRSS36    | -0.021248839 | 0.687409388 | 0.751771442 |
| SNX2      | -0.021245137 | 0.687460987 | 0.751786589 |
| GPR144    | 0.021237156  | 0.687572229 | 0.751866953 |
| CLC       | -0.021233022 | 0.687629847 | 0.751888674 |
| SERPINF1  | 0.021215183  | 0.687878519 | 0.752119287 |

|           |              |             |             |
|-----------|--------------|-------------|-------------|
| OR10G4    | -0.021207906 | 0.687979971 | 0.752188917 |
| PRAMEF18  | 0.021203487  | 0.688041586 | 0.752214985 |
| LOC645323 | 0.021141674  | 0.688903573 | 0.753116027 |
| FAM105B   | 0.021138018  | 0.68895457  | 0.753130434 |
| EVX1      | 0.021125339  | 0.689131443 | 0.753282435 |
| CKAP2     | -0.021112643 | 0.689308567 | 0.753434693 |
| LOC440563 | -0.021097483 | 0.689520083 | 0.753624524 |
| TCTN1     | -0.021084389 | 0.689702785 | 0.753741894 |
| C14orf39  | 0.021084362  | 0.689703165 | 0.753741894 |
| KCNK16    | -0.021014406 | 0.690679634 | 0.754767609 |
| PRR5L     | -0.021001769 | 0.690856071 | 0.754918993 |
| ADORA1    | -0.020995355 | 0.690945629 | 0.754975431 |
| BAT2      | 0.020972683  | 0.691262253 | 0.755242424 |
| CTSF      | -0.020972313 | 0.691267418 | 0.755242424 |
| ERP44     | 0.020968046  | 0.691327013 | 0.755242424 |
| CAMK2A    | 0.020964379  | 0.691378225 | 0.755242424 |
| CYP51A1   | 0.020964281  | 0.691379595 | 0.755242424 |
| UNC13C    | 0.020942545  | 0.691683208 | 0.75553264  |
| KRT82     | 0.020939776  | 0.69172189  | 0.755533452 |
| FLJ45445  | 0.020906206  | 0.692190917 | 0.756004284 |
| NLRP2     | 0.02090138   | 0.692258346 | 0.756036466 |
| NR2E1     | -0.020875991 | 0.692613161 | 0.756331183 |
| SGCG      | -0.020875545 | 0.692619398 | 0.756331183 |
| FOXK1     | -0.020873918 | 0.692642135 | 0.756331183 |
| TMPRSS11F | -0.02086975  | 0.692700393 | 0.756353326 |
| C14orf86  | 0.020851777  | 0.692951619 | 0.756586156 |
| C1orf70   | -0.02084208  | 0.693087169 | 0.756692669 |
| NUDT7     | -0.020807198 | 0.693574876 | 0.757142227 |
| ACCS      | -0.020807191 | 0.693574976 | 0.757142227 |
| SLCO5A1   | 0.020797342  | 0.693712702 | 0.757251067 |
| IQCF2     | 0.020747183  | 0.69441428  | 0.757975357 |
| PDE6D     | 0.020723746  | 0.694742198 | 0.75827465  |
| GMPPB     | -0.020721783 | 0.694769653 | 0.75827465  |
| SPHK2     | -0.020716854 | 0.694838623 | 0.75827465  |
| OLIG1     | 0.020715169  | 0.6948622   | 0.75827465  |
| PRMT8     | -0.020713979 | 0.694878853 | 0.75827465  |
| PYROXD1   | -0.020701105 | 0.695059021 | 0.758429698 |
| EPS8L2    | 0.020651369  | 0.695755167 | 0.759147718 |
| KIAA1549  | -0.020646284 | 0.695826358 | 0.759183801 |
| FAM113B   | 0.02063576   | 0.695973711 | 0.759302972 |
| LMTK3     | 0.020615709  | 0.69625446  | 0.759567657 |
| WDR89     | -0.020612601 | 0.696297991 | 0.759573536 |
| BCL2L1    | -0.020608697 | 0.696352661 | 0.759591568 |
| CHGB      | 0.020604833  | 0.696406776 | 0.759608991 |
| EPHA5     | 0.020595113  | 0.696542898 | 0.759715856 |
| UQCC      | -0.020577868 | 0.69678444  | 0.759937685 |

|           |              |             |             |
|-----------|--------------|-------------|-------------|
| AQP12B    | 0.020557796  | 0.697065614 | 0.76020271  |
| PCCB      | -0.020554906 | 0.6971061   | 0.760205234 |
| SLC22A24  | -0.020549274 | 0.697185003 | 0.760249649 |
| FAM53C    | 0.020538794  | 0.69733183  | 0.760368123 |
| LOC150622 | -0.020517758 | 0.697626598 | 0.76064789  |
| ASCL4     | 0.020510267  | 0.697731579 | 0.760708347 |
| DDX31     | 0.02050835   | 0.697758442 | 0.760708347 |
| CYP24A1   | -0.020491223 | 0.697998478 | 0.760928383 |
| LY6D      | -0.020472455 | 0.698261548 | 0.761173503 |
| HIST1H4I  | 0.020461529  | 0.698414715 | 0.761298799 |
| ACTN3     | 0.020452518  | 0.698541045 | 0.761394829 |
| AMELX     | 0.020373852  | 0.699644264 | 0.762555578 |
| DSCR6     | 0.020338475  | 0.700140607 | 0.76305479  |
| ZNF643    | 0.02032033   | 0.700395221 | 0.763290513 |
| MTA2      | 0.020310822  | 0.700528663 | 0.763394162 |
| KCNH5     | -0.020297051 | 0.700721937 | 0.763563    |
| NBPF6     | -0.020293042 | 0.70077822  | 0.763582549 |
| AIPL1     | -0.020283249 | 0.700915681 | 0.763690545 |
| LOC90784  | 0.020276092  | 0.701016146 | 0.763758222 |
| OTUD6A    | 0.020269386  | 0.70111029  | 0.763781391 |
| OR14I1    | -0.020265601 | 0.701163429 | 0.763781391 |
| PLEKHF2   | -0.020263319 | 0.701195467 | 0.763781391 |
| LRRC56    | 0.020262568  | 0.701206004 | 0.763781391 |
| NCRNA0015 | -0.020260918 | 0.701229171 | 0.763781391 |
| UBE2U     | 0.020228835  | 0.701679652 | 0.764230258 |
| C2orf27B  | 0.020221726  | 0.701779482 | 0.764297188 |
| RPTN      | 0.020213148  | 0.701899962 | 0.764386599 |
| LOC285627 | -0.020205216 | 0.702011368 | 0.764457523 |
| CYB5R2    | 0.020203045  | 0.70204186  | 0.764457523 |
| GTF2H2C   | -0.020189555 | 0.702231344 | 0.764622046 |
| OR52E2    | -0.020176321 | 0.702417238 | 0.764782642 |
| SEMA4G    | 0.020169166  | 0.702517754 | 0.764850267 |
| OR4N3P    | -0.020159613 | 0.702651974 | 0.764954576 |
| ARSI      | -0.020150485 | 0.70278022  | 0.765052371 |
| IQCF6     | -0.020142924 | 0.702886464 | 0.765126206 |
| ZNF83     | -0.020133483 | 0.703019135 | 0.765190037 |
| ALKBH3    | 0.020133283  | 0.703021948 | 0.765190037 |
| OR4K1     | -0.020125395 | 0.703132794 | 0.76526886  |
| CLPTM1    | -0.020115677 | 0.703269365 | 0.765375671 |
| CBARA1    | 0.020083633  | 0.70371977  | 0.765824001 |
| ASB12     | 0.020065776  | 0.703970816 | 0.766055177 |
| C1QTNF9B  | -0.020063051 | 0.704009131 | 0.766055177 |
| C11orf85  | 0.020057922  | 0.704081244 | 0.766091787 |
| FLJ39609  | -0.020051769 | 0.70416776  | 0.766144063 |
| PMS2L5    | 0.02002465   | 0.704549105 | 0.766465315 |
| LOC285740 | 0.020024379  | 0.704552916 | 0.766465315 |

|           |              |             |             |
|-----------|--------------|-------------|-------------|
| MTMR7     | 0.020022561  | 0.704578485 | 0.766465315 |
| IL1F6     | -0.019971412 | 0.705297968 | 0.767206087 |
| RETNLB    | 0.019967616  | 0.705351363 | 0.767222262 |
| KLK9      | -0.019932988 | 0.705838621 | 0.76771033  |
| SUSD4     | -0.019906224 | 0.706215296 | 0.768070366 |
| HK3       | 0.019903988  | 0.706246776 | 0.768070366 |
| GFRAL     | 0.019890717  | 0.706433579 | 0.768231569 |
| RIT1      | -0.019873116 | 0.706681362 | 0.768440321 |
| HLA-DRB5  | 0.019871599  | 0.706702711 | 0.768440321 |
| H2BFXP    | -0.019858266 | 0.706890445 | 0.76860249  |
| TIGIT     | 0.01985186   | 0.706980645 | 0.768658598 |
| LOC100134 | 0.019848677  | 0.707025456 | 0.768665354 |
| ARL14     | -0.019827305 | 0.707326425 | 0.768906083 |
| XIRP2     | 0.019823487  | 0.70738019  | 0.768906083 |
| MSMP      | -0.019822212 | 0.707398149 | 0.768906083 |
| DPEP1     | 0.019819591  | 0.707435072 | 0.768906083 |
| TPI1P3    | 0.019819246  | 0.707439928 | 0.768906083 |
| FUT3      | 0.019801291  | 0.707692814 | 0.769109038 |
| TGFBI     | -0.019800504 | 0.707703898 | 0.769109038 |
| ZNF564    | -0.019795164 | 0.707779131 | 0.769148827 |
| CPXCR1    | -0.019790994 | 0.707837872 | 0.769170689 |
| SASS6     | 0.019764909  | 0.708205358 | 0.769454218 |
| MNS1      | -0.019764538 | 0.708210585 | 0.769454218 |
| ANKRD1    | 0.019764246  | 0.708214703 | 0.769454218 |
| PRKAR1B   | 0.019757272  | 0.708312956 | 0.769512913 |
| IL25      | -0.019754927 | 0.708346007 | 0.769512913 |
| KCNJ11    | 0.019749534  | 0.708422001 | 0.769553491 |
| MAP4K2    | -0.019739528 | 0.708563    | 0.769664675 |
| SLC22A14  | 0.019736126  | 0.708610931 | 0.769674759 |
| CLDN15    | -0.019728822 | 0.708713868 | 0.769744584 |
| C15orf5   | -0.019715508 | 0.708901513 | 0.769906399 |
| LOC643955 | -0.019700522 | 0.709112736 | 0.770093802 |
| TEX15     | -0.019681839 | 0.709376115 | 0.770337823 |
| ZSCAN1    | -0.019675957 | 0.709459033 | 0.770385858 |
| LOC729678 | 0.019655672  | 0.709745043 | 0.77065441  |
| OSTalpha  | -0.019650937 | 0.709811815 | 0.770684892 |
| SERPINB13 | 0.019619496  | 0.710255198 | 0.771104947 |
| TMEM67    | 0.019618012  | 0.710276131 | 0.771104947 |
| TECRL     | 0.019614059  | 0.710331878 | 0.771123432 |
| HNRNPH1   | -0.019601367 | 0.710510902 | 0.771275733 |
| MYEOV     | 0.019596799  | 0.710575343 | 0.771303644 |
| PLA2G4D   | -0.019584943 | 0.710742589 | 0.771443136 |
| FAM184A   | 0.019581832  | 0.710786486 | 0.771448736 |
| NMUR2     | -0.019547265 | 0.71127419  | 0.771935994 |
| CDH22     | 0.019531732  | 0.711493389 | 0.77213181  |
| GAS2L2    | 0.019518061  | 0.711686333 | 0.772297257 |

|           |              |             |             |
|-----------|--------------|-------------|-------------|
| DBX2      | 0.019515435  | 0.711723402 | 0.772297257 |
| LOC100144 | 0.019507044  | 0.711841841 | 0.772383691 |
| INSM2     | -0.019479914 | 0.712224807 | 0.772757125 |
| UGT1A9    | -0.01946306  | 0.712462769 | 0.772973199 |
| DYNC1I1   | 0.019448088  | 0.712674166 | 0.773160431 |
| FAM72A    | 0.019437004  | 0.712830689 | 0.773288112 |
| NBPF4     | -0.019425853 | 0.712988169 | 0.773416819 |
| PCGF6     | 0.019413788  | 0.713158574 | 0.773559531 |
| EXT1      | 0.01940741   | 0.713248654 | 0.773615105 |
| LOC100302 | -0.019382273 | 0.713603746 | 0.773944128 |
| ACAP3     | 0.019380433  | 0.713629728 | 0.773944128 |
| NCRNA0018 | 0.019375671  | 0.713697003 | 0.773957508 |
| OASL      | -0.019374059 | 0.713719791 | 0.773957508 |
| C11orf46  | -0.019368901 | 0.713792661 | 0.773994384 |
| FER       | 0.019363348  | 0.713871119 | 0.774037314 |
| LOC100128 | 0.019357472  | 0.713954136 | 0.774043891 |
| ADAM29    | 0.019357417  | 0.71395492  | 0.774043891 |
| LOC728276 | -0.019312664 | 0.714587357 | 0.774687383 |
| PILRA     | 0.019290531  | 0.714900211 | 0.774984361 |
| POLH      | -0.019280425 | 0.715043074 | 0.77509704  |
| NF1P1     | -0.019262603 | 0.715295039 | 0.775298539 |
| C8orf34   | -0.019259157 | 0.715343772 | 0.775298539 |
| LOC729467 | 0.019257672  | 0.715364757 | 0.775298539 |
| CABLES1   | -0.019256263 | 0.715384683 | 0.775298539 |
| FAM74A4   | -0.019241851 | 0.715588472 | 0.775442133 |
| RHPN2     | -0.019241386 | 0.715595055 | 0.775442133 |
| VSIG1     | -0.019236089 | 0.715669953 | 0.775481098 |
| CBS       | 0.019212174  | 0.716008173 | 0.775805373 |
| FLJ43390  | 0.019201499  | 0.716159171 | 0.775914403 |
| CDYL      | 0.019199551  | 0.716186721 | 0.775914403 |
| IMP5      | 0.019192355  | 0.716288512 | 0.775967712 |
| ANXA2P2   | 0.019190563  | 0.716313854 | 0.775967712 |
| PNPLA2    | -0.0191522   | 0.716856616 | 0.776413009 |
| CAPN9     | 0.019152073  | 0.71685841  | 0.776413009 |
| OR11H1    | -0.019151751 | 0.716862958 | 0.776413009 |
| CELF5     | 0.019150486  | 0.716880864 | 0.776413009 |
| EPHB3     | -0.019139643 | 0.717034296 | 0.776529511 |
| GUSBP1    | 0.019137373  | 0.717066418 | 0.776529511 |
| UBE2DNL   | 0.019119894  | 0.717313783 | 0.776733183 |
| DDTL      | 0.019118571  | 0.717332498 | 0.776733183 |
| MT4       | 0.019113084  | 0.717410154 | 0.776775035 |
| KLHL10    | -0.019104689 | 0.717528975 | 0.776861451 |
| PLEKHH1   | -0.019084658 | 0.717812525 | 0.7771262   |
| GIGYF1    | -0.01908141  | 0.717858502 | 0.777133728 |
| CCDC33    | -0.019062333 | 0.718128584 | 0.777383853 |
| SLC25A32  | 0.019057785  | 0.718192972 | 0.777411297 |



|           |              |             |             |
|-----------|--------------|-------------|-------------|
| GOLGA7B   | -0.019054425 | 0.718240543 | 0.777420535 |
| HRSP12    | -0.019049356 | 0.718312319 | 0.77745597  |
| KANK4     | 0.019036166  | 0.71849909  | 0.777615857 |
| MPV17L    | -0.019026888 | 0.71863048  | 0.777715792 |
| DEFB131   | -0.019020127 | 0.718726231 | 0.777777149 |
| CTSG      | 0.019010679  | 0.718860046 | 0.777804993 |
| EPHX1     | 0.019010337  | 0.718864892 | 0.777804993 |
| VN1R2     | -0.019010038 | 0.718869129 | 0.777804993 |
| SNTN      | 0.019005607  | 0.718931886 | 0.777830635 |
| OR10H4    | -0.018993751 | 0.719099809 | 0.777970051 |
| S100A7A   | 0.01898942   | 0.719161167 | 0.777994168 |
| TMEM59L   | 0.018947427  | 0.719756094 | 0.778570952 |
| TMPRSS7   | -0.018946267 | 0.719772523 | 0.778570952 |
| AADACL3   | -0.018937231 | 0.719900563 | 0.778667158 |
| STMN4     | -0.018932149 | 0.719972576 | 0.778702757 |
| D2HGDH    | -0.018926296 | 0.720055521 | 0.778750173 |
| C17orf63  | 0.018905897  | 0.720344631 | 0.779020545 |
| ADAD1     | 0.018902943  | 0.720386486 | 0.779023505 |
| PRR15     | -0.01889124  | 0.720552374 | 0.779160587 |
| PRRG2     | -0.018886322 | 0.720622086 | 0.77919366  |
| TBX5      | 0.018880278  | 0.720707762 | 0.779243992 |
| USP17     | -0.01885562  | 0.721057339 | 0.779543992 |
| FBLN1     | 0.018851807  | 0.721111397 | 0.779543992 |
| SPDYC     | 0.018850337  | 0.72113224  | 0.779543992 |
| LOC649330 | -0.018849663 | 0.721141801 | 0.779543992 |
| A2ML1     | -0.018834824 | 0.721352209 | 0.779709608 |
| ECT2      | 0.018833335  | 0.721373313 | 0.779709608 |
| GHRHR     | -0.018822797 | 0.721522756 | 0.779828812 |
| SNAP25    | 0.018802193  | 0.721814963 | 0.780062796 |
| CHRNE     | 0.018802008  | 0.721817585 | 0.780062796 |
| C18orf45  | 0.018796707  | 0.721892782 | 0.780063925 |
| PPP1R13L  | -0.018796411 | 0.721896969 | 0.780063925 |
| POU4F1    | -0.018781932 | 0.722102353 | 0.780243523 |
| GPR148    | 0.018757622  | 0.72244722  | 0.780540033 |
| SLC26A5   | 0.018757063  | 0.722455155 | 0.780540033 |
| C2orf57   | -0.018742552 | 0.722661037 | 0.780707633 |
| PARD6G    | -0.018740603 | 0.722688688 | 0.780707633 |
| HOXA10    | 0.018728186  | 0.722864884 | 0.780855617 |
| CASP6     | -0.01872223  | 0.722949397 | 0.780904553 |
| SPEM1     | 0.018701366  | 0.723245507 | 0.78118203  |
| GLIPR2    | -0.018691228 | 0.723389396 | 0.781295071 |
| SEZ6L2    | 0.018681305  | 0.723530243 | 0.781404815 |
| DHDDS     | -0.018655923 | 0.723890566 | 0.781751566 |
| CSPG4PY2  | -0.018651873 | 0.723948064 | 0.781753747 |
| OR2B3     | -0.01865025  | 0.723971095 | 0.781753747 |
| TMIGD2    | 0.018631947  | 0.724230978 | 0.781991972 |

|           |              |             |             |
|-----------|--------------|-------------|-------------|
| INSL4     | 0.018618304  | 0.72442471  | 0.782158747 |
| LOC100268 | 0.018606803  | 0.72458803  | 0.782292672 |
| SPI1      | 0.018601342  | 0.724665593 | 0.782333999 |
| MFNG      | -0.018576921 | 0.725012449 | 0.78266603  |
| CXCL1     | -0.0185536   | 0.725343743 | 0.782981226 |
| ZKSCAN5   | -0.018545938 | 0.725452598 | 0.783056287 |
| GPDI1     | -0.01853823  | 0.725562108 | 0.783132046 |
| APOBEC3D  | -0.018530476 | 0.72567228  | 0.7832064   |
| ARL8B     | -0.018527846 | 0.725709651 | 0.7832064   |
| FAM170A   | 0.018516702  | 0.72586801  | 0.783334855 |
| PHGR1     | -0.018509909 | 0.725964546 | 0.783396582 |
| WRB       | -0.018498348 | 0.726128838 | 0.783531416 |
| CLUL1     | -0.018483358 | 0.726341885 | 0.783718841 |
| CYP2S1    | -0.018478052 | 0.726417306 | 0.783757755 |
| AADA4L4   | 0.018461244  | 0.726656216 | 0.78397305  |
| SLC25A2   | 0.018450062  | 0.726815186 | 0.784102081 |
| MTX2      | -0.018444786 | 0.726890191 | 0.78414052  |
| ANGPT2    | 0.018427993  | 0.72712895  | 0.784355598 |
| LOC100130 | 0.018398662  | 0.727546038 | 0.784763004 |
| WBP5      | 0.01835007   | 0.72823719  | 0.785465968 |
| AGAP4     | -0.018340819 | 0.728368794 | 0.785565368 |
| CD101     | -0.018329517 | 0.728529591 | 0.785696241 |
| ACAN      | 0.01831958   | 0.728670967 | 0.785806157 |
| PWRN2     | -0.018306111 | 0.728862622 | 0.785970279 |
| CATSPER4  | -0.018273679 | 0.729324178 | 0.786425416 |
| ACSBG2    | -0.01824954  | 0.72966778  | 0.786753321 |
| NRG4      | -0.018245066 | 0.729731472 | 0.786779398 |
| LOC100190 | -0.018240707 | 0.729793519 | 0.786803699 |
| IQCH      | 0.018230863  | 0.729933659 | 0.786912186 |
| SLC5A6    | -0.018223385 | 0.730040125 | 0.786984361 |
| FAM169A   | -0.018216254 | 0.730141662 | 0.787051215 |
| STRBP     | -0.018207621 | 0.730264576 | 0.787141104 |
| FAM96A    | 0.018200835  | 0.730361213 | 0.787202661 |
| SLC17A6   | -0.018192255 | 0.730483384 | 0.78729173  |
| BCL2A1    | 0.018184535  | 0.730593335 | 0.787367621 |
| GDF9      | 0.018142862  | 0.731186878 | 0.787964647 |
| PLEKHG6   | 0.018117986  | 0.731541273 | 0.788303904 |
| RAC2      | 0.018105209  | 0.731723308 | 0.788457401 |
| WFDC12    | -0.018084587 | 0.732017164 | 0.788731365 |
| C6orf70   | 0.018067749  | 0.732257124 | 0.788947232 |
| C10orf50  | -0.018024638 | 0.732871631 | 0.789566596 |
| PPP1R14C  | -0.017995008 | 0.733294079 | 0.789978989 |
| TMPRSS15  | 0.017954714  | 0.733868686 | 0.790555249 |
| LOC729082 | -0.01793962  | 0.734083968 | 0.790744386 |
| LOC150568 | -0.017924757 | 0.734295982 | 0.79091693  |
| TMPRSS13  | -0.017922823 | 0.734323577 | 0.79091693  |

|           |              |             |             |
|-----------|--------------|-------------|-------------|
| C6orf15   | -0.017903855 | 0.734594168 | 0.791165586 |
| C1orf172  | 0.017872825  | 0.735036915 | 0.791599619 |
| CSRP2     | 0.017864181  | 0.735160266 | 0.7916781   |
| COLQ      | 0.017862147  | 0.735189294 | 0.7916781   |
| SLC7A5P2  | -0.01783917  | 0.735517216 | 0.791988395 |
| C3orf42   | 0.017831758  | 0.735623012 | 0.792059488 |
| BECN1     | 0.01781354   | 0.735883059 | 0.792294448 |
| C1orf141  | -0.017810897 | 0.735920798 | 0.792294448 |
| PDX1      | 0.017793343  | 0.736171396 | 0.792521399 |
| DSG3      | -0.017772931 | 0.736462839 | 0.792753665 |
| OR51B4    | 0.017772656  | 0.736466762 | 0.792753665 |
| FGA       | -0.017756671 | 0.736695031 | 0.79295652  |
| DOK4      | 0.017737687  | 0.73696614  | 0.793167424 |
| C1QTNF4   | -0.017737373 | 0.736970626 | 0.793167424 |
| SP6       | -0.017716    | 0.7372759   | 0.793408212 |
| IQCF5     | 0.017714144  | 0.737302408 | 0.793408212 |
| STAT5A    | -0.017713341 | 0.737313873 | 0.793408212 |
| PRAMEF13  | -0.017690615 | 0.737638524 | 0.793714675 |
| SOX11     | 0.017667878  | 0.737963372 | 0.794021316 |
| B3GNT3    | 0.017663944  | 0.738019588 | 0.794038903 |
| TCEAL4    | -0.017649955 | 0.738219473 | 0.794211053 |
| HAPLN3    | 0.017638457  | 0.738383792 | 0.794344924 |
| KRT84     | -0.017631321 | 0.73848578  | 0.794411727 |
| IGFL1     | -0.017603813 | 0.738878943 | 0.794791733 |
| APOC3     | -0.017600554 | 0.738925529 | 0.794796445 |
| C2orf88   | 0.017597923  | 0.738963143 | 0.794796445 |
| NSF       | -0.017588816 | 0.739093322 | 0.794893531 |
| HPSE      | -0.017574641 | 0.739295968 | 0.795029921 |
| ZCCHC12   | -0.01757436  | 0.73929998  | 0.795029921 |
| FAM5B     | -0.017566175 | 0.73941701  | 0.795112838 |
| DES       | -0.017561699 | 0.739481009 | 0.795138724 |
| ABCB1     | -0.017547472 | 0.73968443  | 0.795314514 |
| PAX1      | -0.017538881 | 0.739807282 | 0.795403662 |
| TSPAN16   | 0.017522664  | 0.740039188 | 0.795610043 |
| GALP      | 0.017509073  | 0.740233577 | 0.79577607  |
| ORC4L     | 0.017501575  | 0.740340821 | 0.795848399 |
| NUDCD3    | 0.017470843  | 0.74078042  | 0.796277976 |
| NCRNA0020 | 0.017437845  | 0.74125255  | 0.79670336  |
| ALG1L2    | 0.017437592  | 0.741256167 | 0.79670336  |
| PAX3      | 0.017431314  | 0.741346    | 0.796756912 |
| KIFC3     | 0.017427518  | 0.741400316 | 0.79677229  |
| MYH3      | 0.017413454  | 0.741601583 | 0.796945581 |
| FLJ43663  | -0.017392064 | 0.741907721 | 0.797231547 |
| NPL       | 0.017387086  | 0.741978965 | 0.797257542 |
| DAPL1     | -0.017379673 | 0.742085083 | 0.797257542 |
| MTDH      | 0.017379204  | 0.742091796 | 0.797257542 |

|           |              |             |             |
|-----------|--------------|-------------|-------------|
| KRTAP2-1  | 0.017375939  | 0.742138524 | 0.797257542 |
| DNAH5     | 0.017375852  | 0.742139772 | 0.797257542 |
| LOC100302 | 0.017373593  | 0.742172111 | 0.797257542 |
| AMAC1     | -0.017343558 | 0.742602093 | 0.797676412 |
| IFNB1     | -0.017330289 | 0.74279207  | 0.797801761 |
| OR2AG2    | 0.017329812  | 0.742798908 | 0.797801761 |
| ZIC3      | 0.017313631  | 0.7430306   | 0.798007572 |
| GRIA4     | -0.017306247 | 0.743136346 | 0.798078102 |
| PTCHD2    | 0.017265528  | 0.743719541 | 0.798661346 |
| LOC730668 | 0.017261586  | 0.743776011 | 0.79867892  |
| LOC157627 | 0.017257953  | 0.743828052 | 0.798691737 |
| ACSM4     | -0.017224913 | 0.744301392 | 0.799156902 |
| LILRB3    | 0.017216952  | 0.744415461 | 0.799236288 |
| NCALD     | -0.017201773 | 0.744632961 | 0.799426707 |
| MXRA7     | -0.017197947 | 0.744687791 | 0.799432156 |
| C3orf16   | 0.017193621  | 0.744749788 | 0.799432156 |
| NKX6-1    | 0.017190737  | 0.744791122 | 0.799432156 |
| LOC148824 | 0.017190215  | 0.744798605 | 0.799432156 |
| MT1E      | -0.017183322 | 0.744897382 | 0.799467519 |
| DHRS7     | 0.017181197  | 0.744927835 | 0.799467519 |
| IL22RA1   | 0.017179512  | 0.744951984 | 0.799467519 |
| TREML1    | -0.017160572 | 0.745223447 | 0.799675022 |
| FAM98A    | -0.017160419 | 0.745225646 | 0.799675022 |
| LOC219347 | 0.017145265  | 0.74544286  | 0.799840224 |
| FBXO42    | -0.017142101 | 0.745488211 | 0.799840224 |
| HOXC4     | 0.01713895   | 0.745533381 | 0.799840224 |
| ACSS2     | 0.01713641   | 0.7455698   | 0.799840224 |
| CA5A      | -0.017130605 | 0.745653023 | 0.799840224 |
| STON2     | 0.017130221  | 0.745658528 | 0.799840224 |
| ENPP6     | 0.017130067  | 0.745660738 | 0.799840224 |
| TAS2R43   | 0.017123012  | 0.745761878 | 0.799905628 |
| CDC23     | -0.017101272 | 0.746073572 | 0.800196854 |
| KLK15     | 0.017086161  | 0.746290267 | 0.800386163 |
| RNASE11   | -0.017082653 | 0.746340566 | 0.800397004 |
| LALBA     | 0.01705122   | 0.746791369 | 0.800837333 |
| MATN1     | -0.017040083 | 0.746951119 | 0.800951119 |
| C10orf116 | 0.017035964  | 0.7470102   | 0.800951119 |
| DNASE2    | 0.017035411  | 0.747018132 | 0.800951119 |
| JAKMIP1   | 0.017028788  | 0.747113136 | 0.801009858 |
| OVOL2     | -0.017008204 | 0.747408433 | 0.801283319 |
| FAM118B   | 0.017005161  | 0.74745209  | 0.801286987 |
| GOT1L1    | -0.01699587  | 0.747585391 | 0.801386751 |
| ANKRD20B  | -0.016992607 | 0.747632215 | 0.801393808 |
| FAM184B   | 0.016979011  | 0.747827292 | 0.801559769 |
| MAP1S     | 0.016957163  | 0.748140827 | 0.801852676 |
| RAD51AP2  | -0.01694674  | 0.748290409 | 0.801969836 |

|           |              |             |             |
|-----------|--------------|-------------|-------------|
| CDR1      | 0.016943252  | 0.748340473 | 0.801980332 |
| LOC654433 | 0.016920459  | 0.748667634 | 0.802287771 |
| C4orf35   | 0.016903293  | 0.748914046 | 0.802468307 |
| C19orf59  | 0.016903109  | 0.748916694 | 0.802468307 |
| GOSR2     | 0.016884579  | 0.749182724 | 0.802710171 |
| OC90      | 0.016849171  | 0.749691154 | 0.803211713 |
| TBC1D28   | 0.016838369  | 0.749846288 | 0.803334705 |
| LILRP2    | 0.016832809  | 0.749926129 | 0.803377023 |
| MMP15     | -0.016791301 | 0.750522351 | 0.803918075 |
| NRXN2     | -0.016790727 | 0.750530591 | 0.803918075 |
| AIM2      | -0.016787262 | 0.750580375 | 0.803918075 |
| ONECUT3   | -0.016786001 | 0.750598489 | 0.803918075 |
| ST8SIA1   | -0.016783597 | 0.750633021 | 0.803918075 |
| LOC100240 | 0.016779566  | 0.750690939 | 0.80393687  |
| CHDH      | -0.016771191 | 0.75081126  | 0.80402249  |
| IL1F10    | 0.016761611  | 0.750948898 | 0.804087657 |
| CRTAM     | 0.016761335  | 0.750952866 | 0.804087657 |
| VILL      | -0.016752549 | 0.751079113 | 0.804179598 |
| TUBA3D    | -0.01673925  | 0.751270215 | 0.804340968 |
| C17orf65  | 0.016731801  | 0.751377251 | 0.804412319 |
| PCBP1     | -0.016694994 | 0.751906263 | 0.804935399 |
| ASB2      | 0.016688415  | 0.752000821 | 0.804993354 |
| CCDC27    | 0.016678648  | 0.752141222 | 0.805100373 |
| ZIM2      | 0.016669913  | 0.752266791 | 0.805174682 |
| MPP2      | -0.016668194 | 0.752291504 | 0.805174682 |
| UNC80     | -0.016612768 | 0.753088452 | 0.805984336 |
| RBMX1F    | -0.016609693 | 0.753132676 | 0.805988353 |
| UBQLN3    | 0.016599166  | 0.753284072 | 0.806107055 |
| PFN2      | -0.016592101 | 0.753385683 | 0.806172472 |
| TPO       | -0.01655418  | 0.75393115  | 0.806712812 |
| LPCAT3    | -0.016544606 | 0.75406888  | 0.806816835 |
| EPHX3     | 0.016528664  | 0.754298255 | 0.807018897 |
| OR10H3    | 0.016521115  | 0.754406876 | 0.80709175  |
| RNF216    | -0.016500863 | 0.754698285 | 0.807360139 |
| CHFR      | 0.016475783  | 0.755059231 | 0.807681402 |
| GSTM1     | -0.01647436  | 0.755079706 | 0.807681402 |
| HLA-L     | 0.016459972  | 0.755286796 | 0.807859528 |
| CXorf1    | 0.016444362  | 0.7555115   | 0.808056473 |
| RHOV      | 0.016433098  | 0.755673656 | 0.808186502 |
| B4GALNT2  | -0.016417521 | 0.755897916 | 0.808382934 |
| PRPS1L1   | -0.016405596 | 0.756069606 | 0.808523128 |
| FUT6      | 0.016402558  | 0.75611335  | 0.808526491 |
| LRWD1     | 0.016397996  | 0.756179042 | 0.808553322 |
| USP50     | -0.016392467 | 0.756258649 | 0.808595029 |
| LOC728819 | -0.016368351 | 0.756605932 | 0.808922915 |
| SPRR3     | -0.016341025 | 0.756999514 | 0.809300264 |

|           |              |             |             |
|-----------|--------------|-------------|-------------|
| ZNF286B   | 0.016323135  | 0.757257203 | 0.809532299 |
| SNORA23   | 0.016265193  | 0.758092027 | 0.810381252 |
| RTP4      | -0.016256315 | 0.758219964 | 0.810474509 |
| ZNF337    | 0.01621384   | 0.758832156 | 0.811085358 |
| TMEM51    | -0.016185038 | 0.759247353 | 0.811485592 |
| AP2B1     | -0.016173841 | 0.759408785 | 0.811614573 |
| MSRA      | -0.016169837 | 0.759466513 | 0.811616922 |
| CHRNA3    | 0.016168036  | 0.759492491 | 0.811616922 |
| FSCN3     | -0.016143723 | 0.759843073 | 0.811947996 |
| OR2T4     | 0.016115623  | 0.760248308 | 0.812294047 |
| STX19     | 0.016115611  | 0.760248493 | 0.812294047 |
| NCRNA0008 | -0.016105651 | 0.760392135 | 0.812360231 |
| SLC6A7    | 0.016103282  | 0.760426305 | 0.812360231 |
| OTOF      | 0.016102378  | 0.760439345 | 0.812360231 |
| CNPY1     | 0.016100003  | 0.760473602 | 0.812360231 |
| PRR23A    | 0.016087952  | 0.760647434 | 0.812477318 |
| SYT14     | -0.016081943 | 0.760734119 | 0.812477318 |
| ASF1A     | 0.016081626  | 0.760738698 | 0.812477318 |
| MDH1B     | -0.016081092 | 0.7607464   | 0.812477318 |
| CRIP2     | -0.016075781 | 0.760823013 | 0.812515568 |
| NSUN7     | 0.016067418  | 0.760943667 | 0.812600843 |
| TTC23L    | -0.016058503 | 0.761072276 | 0.812694604 |
| MRGPRX2   | -0.016053628 | 0.761142616 | 0.812726138 |
| ARHGAP16  | 0.016018576  | 0.761648385 | 0.813182533 |
| PAX9      | 0.016017522  | 0.761663594 | 0.813182533 |
| SLC28A2   | -0.016015517 | 0.761692542 | 0.813182533 |
| HSF5      | 0.015985186  | 0.762130286 | 0.813606253 |
| APOBEC3H  | -0.015963885 | 0.762437742 | 0.813875527 |
| MYBPC2    | -0.015962049 | 0.762464258 | 0.813875527 |
| ZCCHC13   | -0.015899046 | 0.763373887 | 0.814778958 |
| AP4S1     | 0.015897761  | 0.763392446 | 0.814778958 |
| MCOLN3    | -0.015882605 | 0.763611322 | 0.81496889  |
| C1orf157  | 0.015874336  | 0.763730751 | 0.815052672 |
| IL27RA    | 0.015862704  | 0.763898744 | 0.815188269 |
| RAD18     | 0.015851766  | 0.764056737 | 0.815313182 |
| DEPDC4    | -0.015837106 | 0.764268501 | 0.815452463 |
| GADL1     | -0.015837061 | 0.764269155 | 0.815452463 |
| LOC400940 | 0.01577968   | 0.765098195 | 0.81629329  |
| DPY19L2P2 | 0.015774472  | 0.765173455 | 0.816329852 |
| UGT2B4    | 0.015765753  | 0.765299463 | 0.816418523 |
| TUBA8     | 0.015763047  | 0.765338559 | 0.816418523 |
| SPINLW1   | -0.015755834 | 0.7654428   | 0.816485986 |
| MAGEB10   | 0.015733748  | 0.765762016 | 0.816782741 |
| PBX4      | 0.015724219  | 0.765899753 | 0.816885903 |
| SEMA3E    | 0.015714116  | 0.766045802 | 0.816997919 |
| ATF7IP2   | -0.015710492 | 0.766098193 | 0.817010042 |

|           |              |             |             |
|-----------|--------------|-------------|-------------|
| ABI3      | 0.015689141  | 0.766406858 | 0.817295452 |
| SCD       | 0.015664601  | 0.766761675 | 0.817630047 |
| C14orf34  | 0.015661654  | 0.766804287 | 0.817631706 |
| AKAP4     | 0.015649333  | 0.766982448 | 0.817735897 |
| NLRP8     | -0.015649218 | 0.766984124 | 0.817735897 |
| C9orf96   | 0.015631727  | 0.767237063 | 0.81794925  |
| PDCD7     | -0.015628993 | 0.767276613 | 0.81794925  |
| MAGEA5    | 0.015624823  | 0.767336922 | 0.81794925  |
| HORMAD1   | -0.01562402  | 0.767348523 | 0.81794925  |
| WISP3     | 0.015583377  | 0.767936422 | 0.818532104 |
| ANXA6     | 0.015574921  | 0.768058749 | 0.818618677 |
| SMARCD3   | -0.01556131  | 0.768255669 | 0.81878474  |
| ATP6V0E2  | 0.015556557  | 0.768324428 | 0.818814202 |
| FKSG83    | -0.015544959 | 0.768492248 | 0.818911924 |
| FCHSD1    | 0.015544536  | 0.768498366 | 0.818911924 |
| FLJ40292  | -0.01554161  | 0.768540705 | 0.818913223 |
| C16orf58  | 0.015536342  | 0.768616933 | 0.81895063  |
| COX15     | -0.015532603 | 0.768671029 | 0.818964452 |
| GRAMD1A   | 0.015529099  | 0.768721734 | 0.818974661 |
| PSKH2     | -0.015516438 | 0.76890496  | 0.819103915 |
| FAM166A   | 0.015513719  | 0.76894431  | 0.819103915 |
| TEKT3     | 0.015512189  | 0.768966447 | 0.819103915 |
| MPO       | -0.015496901 | 0.769187698 | 0.819266258 |
| OR12D3    | -0.015495079 | 0.769214072 | 0.819266258 |
| FEZF1     | -0.015493131 | 0.769242267 | 0.819266258 |
| MAP2      | -0.015487907 | 0.769317879 | 0.819302972 |
| ISL1      | 0.015480893  | 0.769419405 | 0.819367278 |
| FGFBP1    | -0.015461961 | 0.769693451 | 0.819615286 |
| ZNF454    | -0.01544539  | 0.769933345 | 0.819826903 |
| DENND2D   | 0.015424493  | 0.770235893 | 0.820064907 |
| SHOX      | 0.015424263  | 0.770239221 | 0.820064907 |
| CT47A1    | -0.015396214 | 0.770645374 | 0.820412579 |
| KC6       | 0.015396022  | 0.77064816  | 0.820412579 |
| LOC100133 | 0.015381666  | 0.770856052 | 0.82059003  |
| ST7       | -0.015378781 | 0.770897833 | 0.820590643 |
| GTPBP8    | -0.015328011 | 0.771633228 | 0.821329542 |
| ZNF35     | -0.015310612 | 0.771885291 | 0.821535207 |
| ASPDH     | -0.015308979 | 0.771908952 | 0.821535207 |
| RGPD8     | 0.01529844   | 0.772061646 | 0.821653806 |
| YEATS4    | 0.0152908    | 0.772172349 | 0.821727708 |
| SIGLEC12  | 0.015279527  | 0.772335689 | 0.821857614 |
| C5orf56   | -0.01526568  | 0.772536356 | 0.822027224 |
| LOC645431 | 0.015251949  | 0.772735339 | 0.822195025 |
| NBR2      | 0.015246197  | 0.77281871  | 0.822239802 |
| PLEKHG4B  | -0.015236809 | 0.772954769 | 0.822340628 |
| RGS2      | 0.015226767  | 0.773100329 | 0.822451551 |

|           |              |             |             |
|-----------|--------------|-------------|-------------|
| ZNF490    | 0.015219355  | 0.773207755 | 0.822521898 |
| CPA1      | 0.015187368  | 0.773671466 | 0.822928845 |
| C3orf20   | 0.015187265  | 0.773672948 | 0.822928845 |
| SNORA3    | -0.015156936 | 0.774112699 | 0.823352617 |
| TBXAS1    | -0.015149411 | 0.774221814 | 0.823424696 |
| STAP1     | 0.015118729  | 0.774666766 | 0.823853927 |
| SLC15A2   | -0.015094712 | 0.775015103 | 0.824180369 |
| VWDE      | -0.015084482 | 0.775163492 | 0.824294156 |
| TMEM64    | -0.015078609 | 0.775248688 | 0.824340735 |
| GBGT1     | -0.015073256 | 0.775326337 | 0.824379284 |
| OAS1      | -0.015060682 | 0.775508755 | 0.824509625 |
| XBP1      | -0.015059099 | 0.775531725 | 0.824509625 |
| DCLK3     | -0.015047848 | 0.77569495  | 0.824639135 |
| FAM10A4   | 0.01504021   | 0.775805778 | 0.824671328 |
| ANXA2P1   | 0.015040053  | 0.775808051 | 0.824671328 |
| MTBP      | 0.015028451  | 0.775976397 | 0.824806253 |
| TCTA      | 0.015016505  | 0.77614974  | 0.824946474 |
| OR1J2     | 0.01500421   | 0.776328167 | 0.825092082 |
| SDHB      | 0.014973987  | 0.776766791 | 0.825514203 |
| OR13G1    | 0.014969673  | 0.776829415 | 0.825536702 |
| LOC340357 | 0.014931915  | 0.777377524 | 0.826075097 |
| NTNG1     | 0.014899806  | 0.777843702 | 0.826526375 |
| SERPINB3  | -0.014896669 | 0.777889261 | 0.826530685 |
| ALG9      | 0.014887354  | 0.778024521 | 0.826618418 |
| C16orf57  | -0.014885266 | 0.778054846 | 0.826618418 |
| LDOC1     | -0.014848664 | 0.778586404 | 0.827139028 |
| ATXN3L    | 0.014829914  | 0.778858748 | 0.82738422  |
| MC3R      | -0.014777402 | 0.779621622 | 0.828150448 |
| SPRR4     | -0.014765301 | 0.779797445 | 0.828293036 |
| TMEM65    | -0.01474099  | 0.780150722 | 0.828624087 |
| ACSL5     | -0.014727855 | 0.780341613 | 0.828782637 |
| CHL1      | 0.014720798  | 0.780444168 | 0.82882739  |
| OR8S1     | -0.014719228 | 0.780466987 | 0.82882739  |
| KRT40     | 0.014711587  | 0.780578056 | 0.828858637 |
| GPR109B   | -0.014711477 | 0.78057965  | 0.828858637 |
| PRF1      | -0.014708566 | 0.780621958 | 0.828859368 |
| CELA1     | 0.01470164   | 0.780722633 | 0.828922069 |
| LOC100131 | -0.014693724 | 0.780837694 | 0.829000036 |
| ZNF503    | 0.014687492  | 0.780928282 | 0.829052015 |
| OR4D10    | -0.0146817   | 0.781012486 | 0.82909721  |
| IRGM      | -0.014678144 | 0.781064172 | 0.829107883 |
| PLAC2     | -0.014673605 | 0.78113016  | 0.829133735 |
| SLC16A5   | -0.014661656 | 0.781303869 | 0.829273919 |
| TSPAN31   | -0.014633805 | 0.781708819 | 0.829659515 |
| SNW1      | -0.014619803 | 0.781912425 | 0.829831385 |
| MED4      | 0.014609014  | 0.782069315 | 0.829953661 |



|           |              |             |             |
|-----------|--------------|-------------|-------------|
| OR2W5     | 0.014601579  | 0.782177435 | 0.830024172 |
| ZNF202    | -0.014587316 | 0.782384874 | 0.830200062 |
| AKR1E2    | 0.014570087  | 0.782635459 | 0.830421715 |
| TMEM143   | 0.01453884   | 0.783090007 | 0.830859749 |
| PYGB      | -0.014534046 | 0.78315974  | 0.830889469 |
| CHRNA9    | 0.014526264  | 0.783272968 | 0.83096533  |
| GPR22     | 0.014507906  | 0.783540057 | 0.831204402 |
| TMBIM4    | -0.014487687 | 0.783834264 | 0.831472215 |
| TP53TG5   | -0.014459826 | 0.784239722 | 0.831858006 |
| RBP3      | -0.014422762 | 0.784779188 | 0.832385893 |
| PLEK2     | 0.014406144  | 0.785021096 | 0.832598132 |
| HBG2      | -0.014387222 | 0.785296578 | 0.832845956 |
| FGF20     | -0.014375855 | 0.785462077 | 0.832972077 |
| ESYT3     | 0.014373308  | 0.785499152 | 0.832972077 |
| LOC285548 | 0.014351677  | 0.785814126 | 0.833261717 |
| LOC285375 | -0.014347024 | 0.785881878 | 0.833289192 |
| YWHAH     | 0.014323586  | 0.786223217 | 0.833606738 |
| SERPINB12 | -0.014318611 | 0.786295665 | 0.83363917  |
| UPK2      | 0.014305304  | 0.786489488 | 0.833800274 |
| DLX3      | 0.014289316  | 0.786722358 | 0.834002756 |
| TMEM140   | -0.014260876 | 0.78713666  | 0.83439754  |
| PCDHA9    | -0.014228519 | 0.787608102 | 0.834852851 |
| GRIN3A    | -0.014224096 | 0.787672542 | 0.834876719 |
| C9orf78   | 0.014216395  | 0.787784758 | 0.834951221 |
| ZDHHC8P1  | 0.014188626  | 0.788189432 | 0.835335668 |
| NNMT      | 0.014168932  | 0.788476468 | 0.835595406 |
| ALCAM     | 0.014151407  | 0.788731915 | 0.83582164  |
| PPP1R2P9  | -0.01414248  | 0.788862044 | 0.835915058 |
| SH3GL3    | -0.014135146 | 0.788968953 | 0.83593273  |
| ZFR2      | 0.01413511   | 0.788969484 | 0.83593273  |
| DCUN1D2   | -0.014130872 | 0.789031271 | 0.83593273  |
| SERPINA11 | -0.014129819 | 0.789046621 | 0.83593273  |
| SLC38A3   | 0.014119178  | 0.78920175  | 0.836052602 |
| LOC284276 | 0.014110344  | 0.789330541 | 0.83614456  |
| TATDN3    | -0.014101851 | 0.789454367 | 0.83623125  |
| SLC6A2    | 0.014031329  | 0.790482782 | 0.837276067 |
| SAA1      | -0.014001953 | 0.790911281 | 0.837685378 |
| DNAI2     | -0.013996076 | 0.790997016 | 0.83773163  |
| CS        | 0.013992667  | 0.791046744 | 0.837739745 |
| NT5E      | 0.013983816  | 0.791175866 | 0.837831936 |
| MAST2     | -0.013950009 | 0.791669125 | 0.838309705 |
| ZMAT4     | 0.013931975  | 0.791932268 | 0.838543764 |
| CRLF1     | 0.013929057  | 0.791974856 | 0.838544275 |
| RNASE2    | 0.013914509  | 0.79218716  | 0.838724471 |
| C15orf56  | 0.013900175  | 0.792396355 | 0.838901356 |
| EGLN3     | 0.013891174  | 0.792527724 | 0.838995834 |

|           |              |             |             |
|-----------|--------------|-------------|-------------|
| HARBI1    | 0.013884555  | 0.792624347 | 0.839053519 |
| CCDC149   | 0.013870372  | 0.792831367 | 0.839226766 |
| PIN1L     | 0.013867569  | 0.792872287 | 0.839226766 |
| LOC150776 | 0.013855291  | 0.793051518 | 0.839371864 |
| CD86      | -0.013842544 | 0.793237607 | 0.839524204 |
| SOX3      | 0.01383268   | 0.793381607 | 0.839631986 |
| PPA2      | 0.013752085  | 0.794558527 | 0.840832832 |
| CD40      | -0.013686074 | 0.795522819 | 0.841772159 |
| DPP3      | 0.013685535  | 0.795530696 | 0.841772159 |
| COQ10A    | 0.013665987  | 0.795816313 | 0.842029639 |
| FOXRED2   | -0.013656483 | 0.795955193 | 0.842131843 |
| CCL1      | 0.013645203  | 0.796120023 | 0.842237223 |
| PTPDC1    | -0.013643878 | 0.796139378 | 0.842237223 |
| FAM154A   | -0.013630824 | 0.796330153 | 0.842394295 |
| AGTR1     | -0.013624145 | 0.796427764 | 0.842452803 |
| PYDC2     | 0.013620175  | 0.796485788 | 0.842469432 |
| SFTPB     | -0.013609658 | 0.796639502 | 0.842587269 |
| GKN1      | -0.013598815 | 0.796797982 | 0.842710134 |
| ABCB9     | 0.013557348  | 0.797404148 | 0.843306442 |
| GJD2      | 0.0135455    | 0.797577363 | 0.843444838 |
| OR2T5     | 0.013529959  | 0.797804594 | 0.843640339 |
| OXT       | 0.01352569   | 0.797867013 | 0.843661546 |
| C1orf186  | 0.013520207  | 0.797947192 | 0.843675752 |
| WDR16     | -0.013518977 | 0.797965176 | 0.843675752 |
| TSGA14    | 0.013508867  | 0.798113008 | 0.843787257 |
| OPTC      | -0.013483645 | 0.798481853 | 0.844128004 |
| WFDC2     | 0.013478414  | 0.798558352 | 0.844128004 |
| OR5B12    | 0.013478133  | 0.79856247  | 0.844128004 |
| THEG      | 0.013468411  | 0.798704659 | 0.844233495 |
| OSGIN2    | -0.013461285 | 0.798808874 | 0.844256203 |
| CRP       | 0.013459382  | 0.79883672  | 0.844256203 |
| CCDC63    | -0.013458247 | 0.798853321 | 0.844256203 |
| SYCE1     | 0.013454268  | 0.798911514 | 0.8442729   |
| MT2A      | 0.013439943  | 0.799121049 | 0.844449521 |
| SCARNA22  | 0.013417432  | 0.799450363 | 0.844752691 |
| OR51E2    | 0.013399762  | 0.799708874 | 0.844981018 |
| FAM20A    | -0.013393674 | 0.799797949 | 0.845021766 |
| HLA-J     | 0.013391326  | 0.799832301 | 0.845021766 |
| HTR1E     | -0.01334717  | 0.800478425 | 0.845637475 |
| ARHGAP15  | 0.013342348  | 0.800548997 | 0.845637475 |
| IQCB1     | -0.013341786 | 0.800557211 | 0.845637475 |
| YPEL4     | -0.013337305 | 0.800622796 | 0.845637475 |
| TBC1D25   | 0.013336991  | 0.800627396 | 0.845637475 |
| ABRA      | 0.01332023   | 0.800872693 | 0.845851701 |
| TSPAN7    | 0.013308844  | 0.80103935  | 0.845982853 |
| VASH2     | 0.013304369  | 0.801104854 | 0.846007168 |

|           |              |             |             |
|-----------|--------------|-------------|-------------|
| LOC221442 | -0.013300842 | 0.801156484 | 0.846016829 |
| LRTM2     | 0.013294955  | 0.801242644 | 0.846062951 |
| OR5AU1    | -0.013276282 | 0.801515997 | 0.846306722 |
| HLA-E     | -0.013264739 | 0.801684986 | 0.846437042 |
| C12orf61  | 0.013261421  | 0.801733554 | 0.846437042 |
| PGS1      | 0.013259142  | 0.801766928 | 0.846437042 |
| HTN3      | -0.013251067 | 0.80188515  | 0.846516977 |
| CYP11B1   | 0.013237593  | 0.802082427 | 0.846680353 |
| DMRT3     | -0.013223108 | 0.802294525 | 0.846859355 |
| MMP10     | 0.013204943  | 0.80256052  | 0.847083537 |
| FBXO47    | 0.013202795  | 0.802591979 | 0.847083537 |
| CXorf50B  | -0.013146043 | 0.803423195 | 0.847909831 |
| FAM22F    | -0.01314215  | 0.803480214 | 0.847909831 |
| AKR1B1    | 0.01313778   | 0.803544232 | 0.847909831 |
| CTNND2    | 0.013137715  | 0.803545179 | 0.847909831 |
| A2LD1     | 0.013124041  | 0.803745498 | 0.848076273 |
| ANKS1B    | -0.013120963 | 0.803790588 | 0.848078917 |
| SCGB3A2   | -0.013115644 | 0.80386852  | 0.84811621  |
| ZNF354A   | 0.013085191  | 0.804314686 | 0.848541981 |
| FAM75A5   | -0.013075465 | 0.804457213 | 0.848585706 |
| SPOCK2    | -0.01307539  | 0.804458309 | 0.848585706 |
| KIF14     | 0.013073639  | 0.804483963 | 0.848585706 |
| CYLC1     | -0.013065509 | 0.804603092 | 0.848666414 |
| RIC8A     | -0.013062393 | 0.80464875  | 0.848669625 |
| IFNE      | -0.013056104 | 0.804740923 | 0.848721892 |
| BLID      | 0.01304478   | 0.804906871 | 0.848851956 |
| CELA2A    | -0.013033743 | 0.805068627 | 0.848977586 |
| HEBP1     | -0.013014744 | 0.80534708  | 0.849226258 |
| SLC25A27  | 0.012987938  | 0.805740015 | 0.849595616 |
| HIST1H4L  | 0.012958362  | 0.806173605 | 0.850007801 |
| ANKRD53   | -0.012919421 | 0.806744568 | 0.850564776 |
| LCE2C     | 0.012910698  | 0.806872477 | 0.850654599 |
| SLC46A1   | -0.012886838 | 0.807222397 | 0.850978457 |
| HIGD1C    | -0.012858416 | 0.807639261 | 0.85133375  |
| LDLRAD1   | 0.01285803   | 0.807644918 | 0.85133375  |
| MOV10L1   | 0.012847463  | 0.807799913 | 0.851452062 |
| LEAP2     | 0.012824846  | 0.808131693 | 0.851756691 |
| CASC1     | 0.012819829  | 0.808205297 | 0.851781559 |
| LCE3A     | 0.012817396  | 0.808240993 | 0.851781559 |
| SPDYE7P   | 0.012814491  | 0.8082836   | 0.851781559 |
| OR1J1     | 0.01278699   | 0.808687092 | 0.852161672 |
| OR10V1    | -0.012763269 | 0.809035159 | 0.852483343 |
| C6orf195  | -0.012754206 | 0.809168158 | 0.852578375 |
| PLA2G6    | -0.012728045 | 0.809552088 | 0.852937775 |
| CRIPAK    | -0.012717263 | 0.809710329 | 0.853059367 |
| POU6F2    | -0.012710737 | 0.809806115 | 0.853115149 |

|           |              |             |             |
|-----------|--------------|-------------|-------------|
| CRHR1     | -0.012704324 | 0.809900244 | 0.853169181 |
| HS3ST5    | 0.012690861  | 0.810097861 | 0.853332217 |
| STRAP     | 0.012675651  | 0.810321136 | 0.853522263 |
| CADM2     | 0.012662558  | 0.810513349 | 0.853679572 |
| GGT7      | -0.012653735 | 0.810642884 | 0.853733901 |
| PTGES     | -0.012653205 | 0.810650669 | 0.853733901 |
| POLM      | -0.012643871 | 0.81078771  | 0.853833073 |
| C4orf45   | 0.012640002  | 0.810844516 | 0.853847744 |
| GLB1L     | 0.012609895  | 0.811286594 | 0.854268097 |
| ERC2      | -0.012590594 | 0.811570026 | 0.854521364 |
| C2orf56   | 0.012582916  | 0.811682786 | 0.854594907 |
| PLD3      | 0.012563442  | 0.811968801 | 0.85485085  |
| ARRB1     | -0.012552944 | 0.812122989 | 0.854967983 |
| C9orf84   | -0.012543887 | 0.812256025 | 0.855031328 |
| SCARNA9L  | -0.012543002 | 0.812269028 | 0.855031328 |
| TP53AIP1  | 0.012537045  | 0.812356528 | 0.855078237 |
| ZNF20     | -0.012509757 | 0.812757385 | 0.855454961 |
| GPR110    | -0.012461899 | 0.813460543 | 0.85614981  |
| TRAF7     | -0.012448596 | 0.813656037 | 0.856310309 |
| HIST1H2BE | -0.01243923  | 0.813793661 | 0.85640989  |
| MAG       | -0.012428775 | 0.813947314 | 0.856526328 |
| TRIM26    | 0.012423297  | 0.81402782  | 0.856565784 |
| HOXA4     | -0.012412915 | 0.814180411 | 0.856681085 |
| SP140L    | 0.012401799  | 0.814343791 | 0.856807723 |
| CLLU1OS   | -0.012391612 | 0.814493517 | 0.856873884 |
| CPPED1    | -0.01238892  | 0.814533084 | 0.856873884 |
| OR7D2     | 0.012385866  | 0.814577976 | 0.856873884 |
| RUFY4     | -0.012385812 | 0.814578778 | 0.856873884 |
| HLX       | -0.012369831 | 0.814813686 | 0.857075717 |
| CNIH3     | -0.012364399 | 0.814893544 | 0.857114446 |
| SERPINA7  | -0.012351039 | 0.815089937 | 0.857241535 |
| CYP2J2    | 0.012350172  | 0.815102689 | 0.857241535 |
| MLF1      | -0.012347396 | 0.815143507 | 0.857241535 |
| EREG      | -0.012319321 | 0.815556272 | 0.857630328 |
| CXCL16    | -0.012313593 | 0.815640498 | 0.857673611 |
| SORT1     | -0.01228756  | 0.816023299 | 0.858030835 |
| RBPMS     | 0.012279951  | 0.816135202 | 0.858103192 |
| PKLR      | 0.012273277  | 0.816233342 | 0.858117744 |
| IRS4      | -0.01227315  | 0.816235221 | 0.858117744 |
| THY1      | -0.012269939 | 0.816282438 | 0.858122084 |
| HLA-DPB1  | 0.012266319  | 0.816335683 | 0.85813276  |
| E2F3      | -0.012260843 | 0.81641622  | 0.858172122 |
| NUDT13    | -0.01224819  | 0.816602313 | 0.858295185 |
| OPRM1     | 0.012247022  | 0.816619491 | 0.858295185 |
| SYT12     | -0.012236747 | 0.816770621 | 0.858408724 |
| TPPP3     | 0.012226771  | 0.816917353 | 0.85851763  |

|           |              |             |             |
|-----------|--------------|-------------|-------------|
| GFI1      | 0.012221369  | 0.816996816 | 0.858555833 |
| GNAT3     | -0.012180824 | 0.817593273 | 0.859137296 |
| TEX14     | -0.012152161 | 0.818015001 | 0.8595351   |
| HIST2H3C  | 0.012147592  | 0.818082236 | 0.859560395 |
| POMC      | 0.012131324  | 0.818321609 | 0.859766544 |
| LOC134466 | 0.012128042  | 0.818369916 | 0.859771939 |
| IGLON5    | 0.012123082  | 0.818442902 | 0.85980326  |
| GRM2      | -0.012110468 | 0.818628538 | 0.859952913 |
| N4BP3     | 0.012094768  | 0.818859597 | 0.860150265 |
| EPRS      | 0.012089949  | 0.818930527 | 0.860179402 |
| ACOT11    | -0.012079984 | 0.819077186 | 0.860288073 |
| NEDD9     | 0.0120642    | 0.819309518 | 0.860486713 |
| ABCC5     | -0.01205841  | 0.819394755 | 0.860530852 |
| MRRF      | -0.012043033 | 0.819621107 | 0.860723178 |
| ALPPL2    | 0.012036506  | 0.819717192 | 0.860778691 |
| ANKRD22   | 0.011993746  | 0.820346752 | 0.861394367 |
| 44080     | -0.011984021 | 0.820489943 | 0.8614993   |
| COL24A1   | 0.01195938   | 0.82085279  | 0.861834843 |
| UBASH3A   | -0.011952487 | 0.820954305 | 0.861895988 |
| DHCR24    | -0.011930855 | 0.821272893 | 0.862185011 |
| C20orf123 | -0.011907598 | 0.821615439 | 0.862499155 |
| ZNF773    | 0.011901895  | 0.821699442 | 0.862541871 |
| COPS8     | 0.01189237   | 0.821839749 | 0.862643683 |
| KRT73     | 0.011844616  | 0.822543272 | 0.863336633 |
| ZNF629    | -0.011824518 | 0.822839394 | 0.863601925 |
| C1orf158  | 0.01181688   | 0.822951944 | 0.863674534 |
| AHSP      | 0.011806864  | 0.82309954  | 0.863783914 |
| SPANXN2   | 0.011797497  | 0.823237565 | 0.86386011  |
| RHOH      | -0.011796049 | 0.823258902 | 0.86386011  |
| GPR172B   | -0.011792745 | 0.8233076   | 0.863865693 |
| SNORA53   | -0.011787913 | 0.823378801 | 0.863894886 |
| OR10P1    | 0.011771424  | 0.82362181  | 0.864104328 |
| SLC10A4   | 0.011760107  | 0.823788608 | 0.864233795 |
| PLA2G4C   | -0.011752041 | 0.823907499 | 0.864312993 |
| CCL28     | 0.011743788  | 0.824029145 | 0.864395071 |
| ZDHHC3    | 0.011740601  | 0.824076118 | 0.864398815 |
| HTRA4     | -0.011728017 | 0.82426161  | 0.864547846 |
| LOC644669 | 0.011700967  | 0.824660375 | 0.864920548 |
| SLC4A5    | 0.011689279  | 0.824832682 | 0.865055709 |
| RARS2     | 0.011664201  | 0.825202429 | 0.865397913 |
| KRT39     | 0.011659241  | 0.825275568 | 0.865429042 |
| TEX101    | -0.011646577 | 0.825462301 | 0.865579282 |
| RRBP1     | 0.011630152  | 0.82570451  | 0.865780579 |
| FAM19A3   | -0.011627663 | 0.825741216 | 0.865780579 |
| KRTAP3-3  | -0.011580535 | 0.826436281 | 0.866433029 |
| GDF11     | 0.011579571  | 0.826450505 | 0.866433029 |

|           |              |             |             |
|-----------|--------------|-------------|-------------|
| C1orf87   | 0.011569049  | 0.826605704 | 0.866550118 |
| HPX       | -0.011563859 | 0.826682265 | 0.866555896 |
| ASL       | 0.011562776  | 0.826698241 | 0.866555896 |
| LGALS12   | -0.011552232 | 0.826853779 | 0.866673316 |
| PIGY      | 0.011533303  | 0.827133016 | 0.866887453 |
| PRINS     | -0.011531186 | 0.827164251 | 0.866887453 |
| BMP7      | 0.011528871  | 0.827198395 | 0.866887453 |
| ADAM30    | 0.011525483  | 0.827248387 | 0.866887453 |
| CASKIN1   | 0.01152363   | 0.827275724 | 0.866887453 |
| INTS3     | 0.011520003  | 0.827329233 | 0.86689791  |
| CTTN      | 0.011512863  | 0.827434574 | 0.866931538 |
| ARX       | -0.011508849 | 0.8274938   | 0.866931538 |
| TBX3      | -0.011503415 | 0.82757398  | 0.866931538 |
| SNORA14A  | -0.01150317  | 0.827577591 | 0.866931538 |
| FXC1      | 0.011503075  | 0.827578985 | 0.866931538 |
| TTC39C    | -0.011484106 | 0.827858883 | 0.867179132 |
| FGFBP2    | 0.011460933  | 0.828200838 | 0.867491699 |
| EFHC2     | -0.011439997 | 0.828509793 | 0.867769671 |
| OR6B2     | 0.011434949  | 0.828584302 | 0.867795124 |
| BAIAP2    | 0.011432446  | 0.828621245 | 0.867795124 |
| PET112L   | -0.011418257 | 0.828830661 | 0.867968797 |
| RTP2      | 0.011408352  | 0.828976864 | 0.868076257 |
| RRM1      | -0.011397725 | 0.829133726 | 0.868194866 |
| CLIP4     | -0.01139202  | 0.829217936 | 0.868237392 |
| DGAT2     | 0.011381968  | 0.829366307 | 0.86834709  |
| TUBB4Q    | 0.011367102  | 0.829585765 | 0.868531202 |
| LCK       | 0.01134481   | 0.82991488  | 0.86879124  |
| NCRNA0016 | -0.011344369 | 0.829921394 | 0.86879124  |
| ZNF740    | -0.011332431 | 0.830097644 | 0.86893007  |
| ACTL6A    | -0.011326401 | 0.830186681 | 0.868977596 |
| COPZ2     | -0.011288939 | 0.830739849 | 0.86951091  |
| UTY       | 0.011263042  | 0.831122302 | 0.869865495 |
| BCR       | -0.011258382 | 0.831191132 | 0.869891817 |
| ABHD1     | -0.011254957 | 0.831241714 | 0.86989904  |
| TTY15     | -0.011237447 | 0.831500337 | 0.870123966 |
| CPXM1     | -0.011228308 | 0.831635322 | 0.870219495 |
| PPP1R3F   | 0.011212577  | 0.831867699 | 0.87041692  |
| COTL1     | 0.011193115  | 0.832155198 | 0.870671996 |
| NCRNA0017 | -0.011142586 | 0.832901753 | 0.871377631 |
| USP26     | 0.011141545  | 0.832917127 | 0.871377631 |
| NUCKS1    | 0.011126522  | 0.833139116 | 0.871564085 |
| TMEM213   | 0.011123133  | 0.833189197 | 0.871570693 |
| DUSP26    | -0.011092957 | 0.83363514  | 0.871991376 |
| C9orf3    | -0.011085394 | 0.83374692  | 0.871997561 |
| OR2G6     | 0.011084506  | 0.833760039 | 0.871997561 |
| C10orf32  | 0.011081563  | 0.833803544 | 0.871997561 |

|           |              |             |             |
|-----------|--------------|-------------|-------------|
| ZNF488    | 0.011080706  | 0.833816197 | 0.871997561 |
| ATP4A     | 0.01105219   | 0.834237679 | 0.872392531 |
| KRTAP10-1 | 0.010993308  | 0.835108143 | 0.873256953 |
| SMTN      | 0.010972049  | 0.835422464 | 0.873539765 |
| HHATL     | 0.010926489  | 0.836096176 | 0.874198317 |
| OR52N5    | 0.0109083    | 0.836365184 | 0.874433675 |
| CROCC     | 0.010899126  | 0.836500863 | 0.874507471 |
| FAM117A   | 0.010894694  | 0.836566416 | 0.874507471 |
| AGR3      | -0.01089462  | 0.836567503 | 0.874507471 |
| PMPCB     | 0.010878018  | 0.836813069 | 0.874684783 |
| OR56A4    | 0.010877214  | 0.836824965 | 0.874684783 |
| CLCA3P    | 0.010863904  | 0.837021834 | 0.874844643 |
| ATP6V1E2  | -0.010860323 | 0.837074811 | 0.874854099 |
| TNFAIP8L3 | -0.010843881 | 0.837318042 | 0.875062385 |
| FBXO17    | -0.010834381 | 0.837458573 | 0.875163325 |
| PSKH1     | 0.010815243  | 0.837741717 | 0.87541328  |
| TOLLIP    | 0.010807339  | 0.837858651 | 0.875489534 |
| SHB       | 0.010777905  | 0.838294169 | 0.875863609 |
| APOB48R   | -0.0107772   | 0.838304607 | 0.875863609 |
| VWA3A     | 0.01077231   | 0.83837696  | 0.875893252 |
| CYP3A5    | -0.010758743 | 0.83857773  | 0.876057048 |
| LOC644145 | -0.010751115 | 0.838690607 | 0.876129009 |
| LOC91948  | -0.010702004 | 0.839417455 | 0.876838066 |
| RBM28     | -0.010699304 | 0.839457422 | 0.876838066 |
| ACHE      | 0.010688132  | 0.839622789 | 0.8769648   |
| HTA       | 0.01067352   | 0.839839093 | 0.877144721 |
| CHORDC1   | -0.010668377 | 0.839915218 | 0.877146478 |
| SPRR2C    | -0.010665941 | 0.839951283 | 0.877146478 |
| GPR160    | -0.01066448  | 0.839972909 | 0.877146478 |
| MMP26     | 0.010649352  | 0.840196862 | 0.877324362 |
| SNX24     | -0.010647022 | 0.840231361 | 0.877324362 |
| HOXD3     | 0.010625252  | 0.840553668 | 0.877614884 |
| REXO2     | 0.010613141  | 0.840732992 | 0.877756096 |
| TMPRSS12  | 0.01056997   | 0.841372249 | 0.878377456 |
| OR1F2P    | 0.010545083  | 0.841740824 | 0.878716177 |
| ARHGAP9   | -0.01053763  | 0.841851206 | 0.878756723 |
| KRTAP17-1 | -0.010536012 | 0.841875168 | 0.878756723 |
| C17orf44  | -0.010533522 | 0.841912039 | 0.878756723 |
| UBE2K     | -0.010527498 | 0.84200126  | 0.878803789 |
| PIGM      | 0.010522374  | 0.842077152 | 0.87883694  |
| CACNA1S   | 0.010506785  | 0.842308063 | 0.879008695 |
| WASF1     | 0.010505304  | 0.842329999 | 0.879008695 |
| BEX4      | -0.0104908   | 0.842544849 | 0.879186831 |
| C1orf190  | -0.010485947 | 0.842616743 | 0.879212535 |
| CRB2      | -0.010483176 | 0.842657778 | 0.879212535 |
| GJA3      | -0.010475831 | 0.842766589 | 0.879279998 |

|           |              |             |             |
|-----------|--------------|-------------|-------------|
| C9orf130  | -0.010468915 | 0.842869048 | 0.879335442 |
| PCTP      | 0.010462705  | 0.84296105  | 0.879335442 |
| C20orf202 | 0.01046179   | 0.842974598 | 0.879335442 |
| SEMA7A    | -0.010460322 | 0.842996347 | 0.879335442 |
| SPINK7    | -0.010447541 | 0.843185714 | 0.879485523 |
| PCP4L1    | -0.010444649 | 0.84322855  | 0.879485523 |
| GPIHBP1   | -0.010390588 | 0.844029591 | 0.880230953 |
| TCEA2     | -0.01039045  | 0.844031648 | 0.880230953 |
| OR13C3    | 0.010339932  | 0.84478033  | 0.880965611 |
| FAM75A2   | -0.010325292 | 0.844997324 | 0.881127225 |
| C16orf73  | -0.010323506 | 0.845023795 | 0.881127225 |
| IGF2AS    | 0.010314175  | 0.845162115 | 0.881225315 |
| TOMM70A   | 0.010304854  | 0.84530028  | 0.881323233 |
| HLA-DMB   | -0.010286535 | 0.845571839 | 0.881560212 |
| CFHR2     | 0.01027977   | 0.845672124 | 0.881601401 |
| C7orf72   | -0.010276557 | 0.845719758 | 0.881601401 |
| HAPLN2    | -0.010274912 | 0.845744151 | 0.881601401 |
| ARG1      | -0.010226554 | 0.846461131 | 0.882302597 |
| METRN     | 0.010156107  | 0.847505844 | 0.883345312 |
| FAM111B   | 0.010142906  | 0.847701629 | 0.883503137 |
| MTMR2     | 0.010105575  | 0.848255376 | 0.883975305 |
| ZG16B     | 0.010101203  | 0.848320233 | 0.883975305 |
| FH        | 0.010101033  | 0.848322757 | 0.883975305 |
| CD1B      | 0.010100396  | 0.848332214 | 0.883975305 |
| LEUTX     | 0.010088885  | 0.848502969 | 0.884018841 |
| PSME3     | -0.010088665 | 0.848506229 | 0.884018841 |
| HADHA     | 0.010088602  | 0.848507163 | 0.884018841 |
| OVCH2     | 0.010077256  | 0.848675493 | 0.884147962 |
| C2orf50   | 0.010059696  | 0.848936026 | 0.884373122 |
| TPSB2     | 0.010049634  | 0.849085315 | 0.884464739 |
| CD36      | 0.010047781  | 0.849112797 | 0.884464739 |
| GPR26     | 0.010044544  | 0.849160829 | 0.884468509 |
| SLMO1     | 0.010033512  | 0.84932453  | 0.884592753 |
| CXCL5     | -0.010023531 | 0.849472627 | 0.88470073  |
| TFDP3     | -0.009966851 | 0.850313765 | 0.885487088 |
| PRKCDBP   | -0.00996666  | 0.850316599 | 0.885487088 |
| CXorf30   | -0.009963476 | 0.850363855 | 0.885489996 |
| TIMP1     | 0.009942763  | 0.850671296 | 0.885763822 |
| SPATA12   | 0.009926526  | 0.850912297 | 0.885968442 |
| TEPP      | -0.009921625 | 0.85098505  | 0.885997871 |
| MYPN      | -0.009894766 | 0.851383768 | 0.886323587 |
| CD200R1L  | 0.009891635  | 0.851430248 | 0.886323587 |
| SLC13A5   | -0.009891557 | 0.851431411 | 0.886323587 |
| TGM7      | -0.009877438 | 0.851641026 | 0.886495454 |
| DUPD1     | -0.009864662 | 0.8518307   | 0.886646547 |
| POTEB     | 0.0098478    | 0.852081054 | 0.886815923 |



|           |              |             |             |
|-----------|--------------|-------------|-------------|
| PPP1R2    | -0.009847704 | 0.852082485 | 0.886815923 |
| C8orf47   | -0.009832493 | 0.852308339 | 0.887004629 |
| MTHFR     | -0.009823404 | 0.85244331  | 0.887098736 |
| SLC9A2    | -0.009816287 | 0.852548992 | 0.887162356 |
| MT1A      | 0.009805567  | 0.852708184 | 0.887266885 |
| SSTR4     | 0.009801121  | 0.85277421  | 0.887266885 |
| NEIL1     | -0.009800351 | 0.852785637 | 0.887266885 |
| C21orf125 | 0.009797522  | 0.852827653 | 0.887266885 |
| UCP3      | 0.009772951  | 0.853192553 | 0.887600151 |
| MYH7      | -0.009768441 | 0.85325954  | 0.887623471 |
| LOC283663 | -0.009759663 | 0.85338992  | 0.887712732 |
| LOC284798 | -0.009746929 | 0.853579055 | 0.887863099 |
| C6orf58   | 0.009732635  | 0.853791373 | 0.88802728  |
| NR2C1     | 0.009730298  | 0.853826079 | 0.88802728  |
| PIP5KL1   | 0.009710499  | 0.854120194 | 0.88826154  |
| TEX13A    | -0.00970913  | 0.854140521 | 0.88826154  |
| DDX20     | 0.009704696  | 0.854206392 | 0.888276449 |
| GPR6      | 0.00970216   | 0.854244065 | 0.888276449 |
| HIST1H3H  | 0.009698921  | 0.854292186 | 0.888280107 |
| CHIA      | 0.009630326  | 0.855311325 | 0.889293361 |
| PLA2G10   | 0.009617164  | 0.855506909 | 0.889450279 |
| ENTHD1    | -0.009594092 | 0.855849767 | 0.889760289 |
| LOC283914 | -0.009586939 | 0.855956076 | 0.889824359 |
| PRR23B    | 0.009577342  | 0.856098695 | 0.889926168 |
| DIO1      | -0.009569802 | 0.856210766 | 0.889996211 |
| KLHDC7B   | 0.009554042  | 0.856445003 | 0.890174516 |
| ASB17     | -0.009552245 | 0.8564717   | 0.890174516 |
| TMEM156   | -0.00953644  | 0.856706622 | 0.890372215 |
| KCNG3     | -0.009526995 | 0.856847019 | 0.890461174 |
| OR5AP2    | -0.009524665 | 0.856881644 | 0.890461174 |
| NFS1      | 0.009510041  | 0.857099033 | 0.890595303 |
| HRK       | 0.009509966  | 0.857100155 | 0.890595303 |
| MAP4K1    | -0.009500894 | 0.857235015 | 0.890688962 |
| VENTX     | -0.00949358  | 0.857343732 | 0.890755448 |
| ETNK2     | 0.009465948  | 0.857754543 | 0.891135778 |
| SLAMF1    | -0.009461681 | 0.857817981 | 0.891155195 |
| RPS6KA4   | 0.009451632  | 0.857967385 | 0.891263913 |
| CCDC96    | 0.009447332  | 0.858031314 | 0.891283832 |
| ZNF385A   | 0.00943571   | 0.858204121 | 0.89141684  |
| STK39     | -0.009432304 | 0.858254764 | 0.891422949 |
| RSPO2     | 0.009424541  | 0.858370194 | 0.891496345 |
| SLC38A10  | -0.009399023 | 0.858749652 | 0.891843937 |
| C3orf72   | 0.009391271  | 0.858864944 | 0.891865021 |
| ZBP1      | 0.009389073  | 0.858897626 | 0.891865021 |
| UPF3B     | -0.009387485 | 0.858921238 | 0.891865021 |
| TCF7L1    | -0.009385613 | 0.858949088 | 0.891865021 |

|           |              |             |             |
|-----------|--------------|-------------|-------------|
| POLN      | -0.009372429 | 0.859145152 | 0.892001453 |
| C15orf41  | 0.009370754  | 0.859170066 | 0.892001453 |
| AGBL4     | -0.00934837  | 0.859502982 | 0.892300573 |
| IGSF22    | -0.009338898 | 0.859643859 | 0.892400305 |
| KRT19     | 0.009335225  | 0.85969849  | 0.892410499 |
| NCRNA0016 | -0.009331594 | 0.859752502 | 0.89242005  |
| LSM14B    | -0.009326927 | 0.859821915 | 0.892445585 |
| HNF1B     | -0.009318144 | 0.859952558 | 0.892534667 |
| ZFP57     | -0.009305178 | 0.860145432 | 0.892688325 |
| LOC643837 | 0.009286811  | 0.860418664 | 0.892840231 |
| DTX3      | -0.009286403 | 0.860424726 | 0.892840231 |
| C3orf24   | -0.009284784 | 0.860448817 | 0.892840231 |
| CXorf41   | 0.009283284  | 0.86047113  | 0.892840231 |
| TM2D3     | 0.00924984   | 0.86096869  | 0.893309965 |
| OLFM4     | -0.009211919 | 0.861532931 | 0.893848831 |
| XAGE2     | 0.009203784  | 0.861653976 | 0.893927846 |
| C1QC      | -0.009199888 | 0.861711945 | 0.893941417 |
| FAM83A    | -0.009183684 | 0.861953085 | 0.894082141 |
| HLA-DPB2  | -0.009183012 | 0.861963083 | 0.894082141 |
| BTNL3     | -0.009181722 | 0.86198228  | 0.894082141 |
| ZNF578    | -0.009172366 | 0.86212151  | 0.894179984 |
| DGCR10    | -0.009127652 | 0.862787    | 0.894803549 |
| CORIN     | -0.009125933 | 0.862812581 | 0.894803549 |
| GRIN3B    | 0.009119775  | 0.862904246 | 0.894852013 |
| BCL11A    | 0.009114114  | 0.862988511 | 0.894892799 |
| DEPDC7    | -0.009096807 | 0.863246129 | 0.895113332 |
| TFAMP1    | -0.009083152 | 0.863449391 | 0.895277483 |
| CXorf57   | 0.009069545  | 0.863651955 | 0.895440894 |
| CACNA1F   | -0.009061793 | 0.863767367 | 0.895513932 |
| OPN4      | 0.009058345  | 0.863818694 | 0.895520525 |
| DSPP      | 0.009052676  | 0.863903091 | 0.8955614   |
| PAQR8     | -0.009023038 | 0.864344357 | 0.895972198 |
| TGIF2LX   | -0.009011099 | 0.864522122 | 0.896109825 |
| FLYWCH1   | -0.008968185 | 0.865161156 | 0.896725535 |
| RSPH1     | 0.008962712  | 0.865242665 | 0.896758804 |
| PRAMEF22  | 0.008959982  | 0.865283313 | 0.896758804 |
| ALDH3A2   | 0.008949526  | 0.865439036 | 0.896873518 |
| HMGCR     | 0.008942837  | 0.865538643 | 0.89693007  |
| ZNF30     | -0.008938798 | 0.86559881  | 0.896945746 |
| MYBL1     | -0.008910711 | 0.86601713  | 0.897312177 |
| FAM18B2   | 0.008907451  | 0.866065684 | 0.897312177 |
| PEX10     | -0.008905979 | 0.866087606 | 0.897312177 |
| GPSM2     | -0.008898943 | 0.866192417 | 0.897374082 |
| MYH8      | -0.00887602  | 0.866533863 | 0.897681122 |
| SEC24C    | 0.008872244  | 0.866590112 | 0.897692696 |
| VAV1      | -0.008866928 | 0.866669313 | 0.897724519 |

|          |              |             |             |
|----------|--------------|-------------|-------------|
| OR4F29   | 0.00886413   | 0.866710988 | 0.897724519 |
| RASAL1   | 0.008849605  | 0.866927364 | 0.897901937 |
| ZHX2     | -0.008838433 | 0.8670938   | 0.898004056 |
| BPNT1    | 0.008836934  | 0.867116143 | 0.898004056 |
| CD3E     | 0.008831078  | 0.867203377 | 0.898047697 |
| C13orf1  | 0.008820171  | 0.867365875 | 0.89816927  |
| TRIM25   | -0.008793412 | 0.86776457  | 0.898535404 |
| ATP5S    | 0.008782051  | 0.867933862 | 0.898663974 |
| NANP     | -0.008771852 | 0.868085833 | 0.898774596 |
| FBXL8    | 0.008763439  | 0.868211208 | 0.898857673 |
| SLC1A2   | -0.008756448 | 0.868315373 | 0.898918784 |
| TCHHL1   | 0.008748744  | 0.868430182 | 0.898990908 |
| CYTH1    | -0.008707478 | 0.869045175 | 0.899580782 |
| OR10A5   | -0.008674965 | 0.869529785 | 0.900031375 |
| ASPH     | 0.008672209  | 0.86957086  | 0.900031375 |
| SNAI3    | -0.008661    | 0.869737946 | 0.90015753  |
| TAS2R8   | -0.00864908  | 0.869915626 | 0.900294637 |
| KIAA0100 | -0.00863044  | 0.870193498 | 0.900520603 |
| RNF2     | 0.008628367  | 0.870224404 | 0.900520603 |
| VPS37C   | -0.008600023 | 0.870646967 | 0.900911064 |
| ID1      | 0.008579287  | 0.870956137 | 0.901184156 |
| AGA      | 0.00855087   | 0.871379848 | 0.901575731 |
| STAU2    | 0.00854671   | 0.871441877 | 0.901593069 |
| KIF6     | -0.008540045 | 0.871541265 | 0.901607565 |
| FAM164A  | -0.008539699 | 0.871546434 | 0.901607565 |
| CAPNS2   | 0.008520644  | 0.87183058  | 0.901854665 |
| SOBP     | -0.008498328 | 0.872163389 | 0.902152074 |
| STAMBPL1 | 0.008480823  | 0.872424454 | 0.902375247 |
| C6orf146 | -0.008476482 | 0.872489198 | 0.902395346 |
| OR13H1   | 0.008447102  | 0.872927411 | 0.90275761  |
| SCARNA4  | -0.008445711 | 0.872948169 | 0.90275761  |
| SNORA77  | -0.008443882 | 0.872975449 | 0.90275761  |
| RCN2     | 0.008432665  | 0.873142768 | 0.902790356 |
| EIF3J    | 0.008430656  | 0.87317273  | 0.902790356 |
| LBP      | 0.008430154  | 0.873180211 | 0.902790356 |
| C22orf33 | -0.008429603 | 0.873188443 | 0.902790356 |
| NEURL4   | -0.008423012 | 0.873286748 | 0.902845122 |
| RAB9BP1  | -0.008402206 | 0.873597123 | 0.903119119 |
| KIF4B    | 0.008396348  | 0.873684527 | 0.903162594 |
| C6orf142 | 0.008392906  | 0.873735865 | 0.903168782 |
| HOXB9    | 0.008384244  | 0.873865094 | 0.903255481 |
| RGN      | 0.008367036  | 0.874121821 | 0.903473949 |
| ALG11    | 0.008317824  | 0.874856096 | 0.904185955 |
| KLB      | 0.008303103  | 0.875075775 | 0.904366065 |
| CARD17   | -0.008274202 | 0.875507069 | 0.904764843 |
| TRIM50   | -0.008268476 | 0.87559252  | 0.904771779 |

|           |              |             |             |
|-----------|--------------|-------------|-------------|
| PIM3      | -0.008267663 | 0.875604645 | 0.904771779 |
| SMARCA1   | -0.008236952 | 0.876063008 | 0.905198444 |
| SNORA68   | -0.008233438 | 0.87611545  | 0.905205665 |
| MAP2K3    | -0.008227948 | 0.876197395 | 0.905243366 |
| FBXO16    | 0.008208537  | 0.876487124 | 0.90547958  |
| ASPHD2    | -0.008205164 | 0.876537469 | 0.90547958  |
| KRTAP13-2 | 0.008203492  | 0.876562431 | 0.90547958  |
| ZNF598    | 0.008172496  | 0.877025129 | 0.905910552 |
| CCNYL1    | -0.008156462 | 0.877264494 | 0.906110803 |
| AMDHD1    | -0.008106094 | 0.878016478 | 0.906840481 |
| TNNT3     | 0.008089806  | 0.878259685 | 0.907044631 |
| TMPRSS3   | -0.00807554  | 0.878472702 | 0.907217582 |
| XK        | 0.008061885  | 0.878676609 | 0.907381108 |
| FIBCD1    | 0.008052422  | 0.878817924 | 0.907479984 |
| KLHL38    | 0.008038616  | 0.8790241   | 0.907645821 |
| NCRNA0011 | 0.00803467   | 0.87908302  | 0.907647438 |
| C16orf63  | -0.008032407 | 0.879116818 | 0.907647438 |
| SPHKAP    | 0.008012802  | 0.879409623 | 0.907902677 |
| RNF40     | 0.007938232  | 0.880523443 | 0.909005462 |
| BCORL2    | 0.007910175  | 0.880942589 | 0.909391025 |
| C19orf29  | -0.007898521 | 0.881116692 | 0.909523605 |
| VTI1A     | -0.007885682 | 0.881308501 | 0.909674448 |
| ADAM8     | 0.007862622  | 0.881653052 | 0.909982925 |
| HOXD4     | 0.007856047  | 0.881751284 | 0.910037148 |
| LGALS3BP  | 0.007850021  | 0.881841328 | 0.910082917 |
| MDFI      | 0.007845607  | 0.881907285 | 0.910103823 |
| CYorf15A  | 0.00783021   | 0.882137343 | 0.910294066 |
| NCAN      | -0.007758655 | 0.883206687 | 0.91135032  |
| SBF1P1    | -0.007676258 | 0.884438308 | 0.912573903 |
| CD209     | -0.00764009  | 0.884979015 | 0.913084503 |
| FLJ42289  | 0.007629223  | 0.8851415   | 0.913204837 |
| OR51G2    | 0.007596326  | 0.885633357 | 0.913664956 |
| C20orf166 | 0.007590388  | 0.885722147 | 0.913709223 |
| ROBO1     | -0.007574272 | 0.885963129 | 0.913910479 |
| PRKY      | 0.007567664  | 0.886061939 | 0.913965066 |
| PRSS1     | -0.007557091 | 0.886220043 | 0.914080804 |
| SNORD10   | 0.007527496  | 0.886662636 | 0.914458138 |
| TBPL1     | 0.007525222  | 0.886696645 | 0.914458138 |
| KIF20B    | 0.007523417  | 0.886723631 | 0.914458138 |
| OR11H12   | -0.007505105 | 0.886997502 | 0.914693209 |
| SSTR5     | 0.007464347  | 0.887607111 | 0.915274459 |
| EIF2S1    | -0.007458416 | 0.887695835 | 0.915318554 |
| C1orf65   | 0.007455239  | 0.887743349 | 0.915320155 |
| C3orf18   | -0.007438517 | 0.887993484 | 0.91553066  |
| FBXO15    | 0.007431908  | 0.888092358 | 0.91555634  |
| ELF5      | -0.007430706 | 0.888110338 | 0.91555634  |

|            |              |             |             |
|------------|--------------|-------------|-------------|
| ONECUT2    | -0.007412446 | 0.888383486 | 0.915790523 |
| C1GALT1    | -0.007397745 | 0.888603413 | 0.915969822 |
| C14orf128  | 0.00736789   | 0.889050083 | 0.916382817 |
| CACNG5     | -0.007357656 | 0.8892032   | 0.916471914 |
| ARHGAP19   | -0.007355961 | 0.889228561 | 0.916471914 |
| FAM53B     | 0.007342567  | 0.88942896  | 0.916631015 |
| DOK3       | 0.007334713  | 0.889546475 | 0.916680716 |
| CRYGN      | -0.007333191 | 0.889569245 | 0.916680716 |
| OR10A4     | 0.007308894  | 0.889932822 | 0.917007924 |
| PLAUR      | -0.007302956 | 0.890021674 | 0.91705203  |
| CLEC4E     | -0.007272151 | 0.890482664 | 0.917479552 |
| CCDC109A   | 0.007263586  | 0.890610838 | 0.91756414  |
| ACOXL      | -0.007256155 | 0.890722047 | 0.917566015 |
| KRTAP4-2   | -0.007255496 | 0.89073191  | 0.917566015 |
| SNRNP48    | -0.007254229 | 0.89075088  | 0.917566015 |
| CASP5      | 0.007226041  | 0.891172746 | 0.917941727 |
| KDM5D      | 0.007223699  | 0.891207798 | 0.917941727 |
| CDK6       | -0.007206352 | 0.891467446 | 0.918161677 |
| MST1P2     | 0.007199176  | 0.891574861 | 0.918224821 |
| LOXL4      | -0.007188093 | 0.89174075  | 0.918348177 |
| TTC23      | 0.007168823  | 0.892029196 | 0.918597726 |
| TCEAL1     | -0.007156141 | 0.892219043 | 0.918745721 |
| C17orf74   | -0.007138823 | 0.892478299 | 0.918965168 |
| ACACA      | -0.007111134 | 0.892892826 | 0.919344464 |
| OR4Q3      | 0.007096457  | 0.893112568 | 0.919458445 |
| ACRC       | 0.007095413  | 0.893128195 | 0.919458445 |
| NECAB2     | -0.007094489 | 0.893142035 | 0.919458445 |
| DMBX1      | -0.007071935 | 0.893479723 | 0.919758539 |
| KCNRG      | -0.007048954 | 0.89382383  | 0.920051264 |
| ST7OT2     | 0.007046143  | 0.893865914 | 0.920051264 |
| TPD52L1    | 0.007041016  | 0.893942686 | 0.920051264 |
| C9orf21    | 0.007040603  | 0.893948881 | 0.920051264 |
| DPEP2      | 0.006992568  | 0.8946682   | 0.920744003 |
| ARRDC5     | 0.006971187  | 0.894988403 | 0.921025943 |
| UBE2L6     | 0.00695547   | 0.895223808 | 0.921220593 |
| FAM117B    | -0.006949768 | 0.895309209 | 0.92126087  |
| SLC2A5     | 0.006946566  | 0.895357169 | 0.921262621 |
| GPR137     | 0.006942218  | 0.89542228  | 0.921282017 |
| DUSP5P     | 0.006934522  | 0.895537562 | 0.921353028 |
| GOLGA8G    | 0.006929124  | 0.895618407 | 0.921388603 |
| PACS1      | -0.006920011 | 0.895754906 | 0.921448012 |
| KRTAP10-10 | 0.006919091  | 0.895768692 | 0.921448012 |
| RDH14      | 0.006903152  | 0.896007431 | 0.921645989 |
| INSL5      | -0.006891861 | 0.896176568 | 0.921772356 |
| FAM181B    | -0.006876416 | 0.896407944 | 0.921962723 |
| PTP4A2     | 0.006865632  | 0.89656949  | 0.922081254 |

|           |              |             |             |
|-----------|--------------|-------------|-------------|
| CSN3      | 0.006860145  | 0.896651681 | 0.922118163 |
| HSF2      | -0.006845027 | 0.896878177 | 0.922303464 |
| THNSL2    | 0.006840967  | 0.896938996 | 0.922318382 |
| ASXL1     | 0.006824572  | 0.89718463  | 0.922523332 |
| DMRT1     | -0.006816753 | 0.897301768 | 0.922596143 |
| SLC22A4   | -0.006813629 | 0.897348579 | 0.922596642 |
| ZNF880    | -0.006804589 | 0.897484015 | 0.922624992 |
| ZFAND3    | -0.006802927 | 0.897508916 | 0.922624992 |
| DEFB125   | -0.006802512 | 0.897515138 | 0.922624992 |
| KLRG2     | 0.006785807  | 0.897765432 | 0.922834654 |
| THSD1P1   | 0.006774265  | 0.897938381 | 0.922964792 |
| TRIB1     | -0.006770672 | 0.897992216 | 0.92297249  |
| FAHD2A    | 0.006759064  | 0.898166151 | 0.923103623 |
| PRH1      | 0.006738763  | 0.898470358 | 0.923368623 |
| TMCO5A    | -0.00673471  | 0.898531097 | 0.923383394 |
| PATE3     | 0.006724379  | 0.898685918 | 0.923494843 |
| CARS      | 0.006703053  | 0.899005504 | 0.923736349 |
| SLC25A21  | -0.006702506 | 0.899013704 | 0.923736349 |
| DISC2     | 0.006696402  | 0.899105181 | 0.92378268  |
| SCARNA6   | 0.006674727  | 0.899430031 | 0.924068771 |
| CSMD3     | 0.006654979  | 0.899726009 | 0.924325173 |
| CEL       | 0.006635852  | 0.900012699 | 0.924572006 |
| FLJ42875  | -0.006626951 | 0.900146111 | 0.924661361 |
| TCP11     | -0.006618511 | 0.900272625 | 0.924743621 |
| ZNF610    | 0.006590981  | 0.900685297 | 0.925119794 |
| CCNO      | 0.006581249  | 0.900831186 | 0.925221922 |
| CHPT1     | -0.006568177 | 0.901027152 | 0.92537547  |
| RGS7      | -0.006561546 | 0.90112656  | 0.925424634 |
| PROP1     | 0.006558785  | 0.90116796  | 0.925424634 |
| CRYL1     | -0.006545045 | 0.901373944 | 0.925588434 |
| SPRYD3    | 0.006520805  | 0.901737368 | 0.92591388  |
| AADACL2   | -0.006445368 | 0.902868491 | 0.927027531 |
| SMOC1     | -0.00643458  | 0.903030266 | 0.927145835 |
| VPS24     | -0.006429242 | 0.903110309 | 0.927156907 |
| TAS1R1    | -0.006427652 | 0.903134162 | 0.927156907 |
| C20orf114 | -0.006407179 | 0.903441182 | 0.927424286 |
| C2orf72   | 0.00640162   | 0.903524551 | 0.927451065 |
| LOC494141 | 0.006399229  | 0.90356041  | 0.927451065 |
| DUSP14    | -0.006378512 | 0.903871118 | 0.927722173 |
| CCDC60    | -0.006363328 | 0.904098853 | 0.927908094 |
| GHSR      | -0.006322883 | 0.904705493 | 0.92848286  |
| BRD7      | 0.006301152  | 0.905031451 | 0.928723193 |
| RPSAP52   | 0.006301053  | 0.905032941 | 0.928723193 |
| LMO1      | -0.006297063 | 0.905092796 | 0.928736759 |
| CABLES2   | 0.006283351  | 0.905298488 | 0.928899964 |
| ACBD7     | 0.0062782    | 0.905375762 | 0.928931391 |

|           |              |             |             |
|-----------|--------------|-------------|-------------|
| HSPB3     | -0.006261416 | 0.905627542 | 0.929141853 |
| PTENP1    | -0.006244636 | 0.905879277 | 0.929352246 |
| MPHOSPH1  | -0.006238083 | 0.905977593 | 0.929369702 |
| C3orf27   | -0.006237281 | 0.905989626 | 0.929369702 |
| LILRA5    | 0.006233285  | 0.906049571 | 0.929383323 |
| MSH6      | 0.006221691  | 0.906223517 | 0.929513872 |
| IL9       | 0.006193923  | 0.906640141 | 0.929814206 |
| FES       | -0.006192942 | 0.906654857 | 0.929814206 |
| LRPPRC    | -0.00619284  | 0.906656393 | 0.929814206 |
| UBL4B     | 0.006186785  | 0.906747249 | 0.929859498 |
| ANG       | 0.006179707  | 0.906853443 | 0.929920514 |
| HOXC12    | -0.006170255 | 0.906995272 | 0.930018065 |
| AKAP8     | 0.006149056  | 0.907313359 | 0.930296326 |
| ASB18     | 0.00614176   | 0.907422843 | 0.930360684 |
| AXIN1     | -0.006094728 | 0.908128643 | 0.931036392 |
| CLRN1     | -0.00608795  | 0.908230366 | 0.931092748 |
| IRX1      | 0.006048252  | 0.908826159 | 0.93165558  |
| PENK      | -0.006035514 | 0.909017338 | 0.931803597 |
| C20orf26  | 0.006014287  | 0.909335958 | 0.932082228 |
| LOC144486 | -0.005979065 | 0.909864653 | 0.932576148 |
| CLEC2A    | -0.005966968 | 0.910046249 | 0.932699647 |
| RELL2     | 0.005963258  | 0.910101933 | 0.932699647 |
| DBNDD1    | 0.005960021  | 0.910150536 | 0.932699647 |
| CT47A7    | 0.005958559  | 0.91017248  | 0.932699647 |
| ST7OT4    | -0.005949297 | 0.910311515 | 0.932794125 |
| HBZ       | -0.00593595  | 0.910511889 | 0.932951444 |
| LILRB4    | -0.005924826 | 0.910678886 | 0.933036856 |
| SDHC      | 0.005924156  | 0.910688949 | 0.933036856 |
| C17orf107 | -0.005919789 | 0.910754506 | 0.933056021 |
| HIGD2B    | -0.005898168 | 0.911079115 | 0.933340564 |
| SLC6A3    | 0.00588748   | 0.911239583 | 0.933456936 |
| KRTAP5-2  | 0.005882005  | 0.911321779 | 0.933489436 |
| WDR45L    | -0.005879123 | 0.911365057 | 0.933489436 |
| CHKB-CPT1 | 0.005863288  | 0.911602815 | 0.933640968 |
| FLJ46111  | -0.005863025 | 0.91160676  | 0.933640968 |
| CD163L1   | -0.005830827 | 0.912090219 | 0.934088076 |
| ASCL3     | 0.005764434  | 0.913087238 | 0.935045139 |
| NOLC1     | -0.005762343 | 0.913118647 | 0.935045139 |
| NUDT6     | -0.005755684 | 0.913218639 | 0.93509945  |
| ARHGAP8   | 0.005750887  | 0.913290687 | 0.935125143 |
| LMO3      | -0.005738892 | 0.913470831 | 0.935261509 |
| C6orf124  | -0.00573361  | 0.913550163 | 0.935294648 |
| NOBOX     | 0.005712843  | 0.913862064 | 0.935565877 |
| NDP       | 0.005688773  | 0.914223599 | 0.935864694 |
| GLUL      | 0.005687153  | 0.914247935 | 0.935864694 |
| APC2      | -0.005667825 | 0.914538239 | 0.936113746 |

|           |              |             |             |
|-----------|--------------|-------------|-------------|
| GRK4      | -0.005655567 | 0.914722374 | 0.936254103 |
| FAM57A    | 0.005648766  | 0.914824526 | 0.936310537 |
| PLEKHG4   | -0.005628981 | 0.915121737 | 0.936495458 |
| UIMC1     | -0.005628627 | 0.915127058 | 0.936495458 |
| ANKRD23   | 0.00562536   | 0.915176131 | 0.936495458 |
| OPALIN    | -0.005622926 | 0.915212701 | 0.936495458 |
| HEPACAM   | 0.005621087  | 0.915240326 | 0.936495458 |
| PDZD9     | -0.005599535 | 0.91556409  | 0.936778609 |
| POU5F2    | -0.005593663 | 0.915652306 | 0.936820738 |
| YIPF4     | 0.005585039  | 0.915781867 | 0.936905162 |
| SNTG1     | 0.005570107  | 0.916006192 | 0.937086522 |
| JMJD7-PLA | -0.005563472 | 0.916105876 | 0.93714036  |
| USH1C     | -0.00552954  | 0.916615694 | 0.937613722 |
| BAIAP3    | 0.005526297  | 0.916664421 | 0.937615406 |
| KDELR3    | -0.005522239 | 0.916725398 | 0.937629618 |
| DEFB103B  | -0.005510412 | 0.916903092 | 0.937763202 |
| BPI       | 0.005454325  | 0.917745884 | 0.938543042 |
| LIMS3     | -0.005453396 | 0.91775984  | 0.938543042 |
| CETN4P    | -0.005428939 | 0.918127368 | 0.938870682 |
| OFD1      | -0.00541988  | 0.918263511 | 0.938961687 |
| PMS2      | 0.005378626  | 0.918883515 | 0.939513616 |
| CNTN5     | 0.005377687  | 0.918897626 | 0.939513616 |
| CGB5      | -0.005369192 | 0.9190253   | 0.939595916 |
| TMEM88    | 0.005339962  | 0.919464631 | 0.939996823 |
| ARG2      | -0.005323042 | 0.919718945 | 0.940208552 |
| OR13J1    | 0.005318763  | 0.919783272 | 0.940226048 |
| COL28A1   | -0.005266152 | 0.920574106 | 0.940901254 |
| IFNA4     | -0.005266075 | 0.920575271 | 0.940901254 |
| CDH24     | -0.005265392 | 0.920585535 | 0.940901254 |
| ZNF683    | 0.005242524  | 0.920929304 | 0.941201285 |
| C20orf117 | 0.005239577  | 0.92097361  | 0.941201285 |
| NCRNA0020 | 0.005200024  | 0.921568243 | 0.941760651 |
| RELA      | 0.005174034  | 0.921959008 | 0.942111635 |
| POLR3D    | -0.005156447 | 0.922223432 | 0.942333486 |
| PAPOLB    | 0.005151733  | 0.922294305 | 0.942357553 |
| C16orf82  | -0.005139374 | 0.922480135 | 0.942499071 |
| C2orf65   | 0.005110447  | 0.922915104 | 0.942895106 |
| SNORA29   | 0.005078234  | 0.923399502 | 0.943341596 |
| MRGPRX4   | 0.00507269   | 0.923482875 | 0.943378377 |
| LIPJ      | 0.005049243  | 0.923835482 | 0.943690174 |
| TCL1A     | -0.005042854 | 0.92393156  | 0.943739909 |
| FAM101A   | 0.005036929  | 0.924020669 | 0.943740769 |
| COPG2     | -0.005036496 | 0.924027178 | 0.943740769 |
| KCTD8     | 0.005023451  | 0.924223363 | 0.943892732 |
| BTG3      | 0.005010343  | 0.924420495 | 0.944045647 |
| LOC100190 | -0.005001658 | 0.924551128 | 0.944130639 |



|           |              |             |             |
|-----------|--------------|-------------|-------------|
| MAST3     | 0.004988468  | 0.924749509 | 0.944284801 |
| CCDC142   | 0.004962503  | 0.92514003  | 0.944635136 |
| LOC284440 | -0.004958489 | 0.92520041  | 0.944648355 |
| FAM35B    | -0.004954088 | 0.925266604 | 0.944667509 |
| PHYHIP    | -0.00494349  | 0.925426015 | 0.944781826 |
| OR4M1     | -0.004935225 | 0.925550324 | 0.944860298 |
| SLC48A1   | 0.004904409  | 0.926013873 | 0.945285062 |
| IRF1      | -0.004878419 | 0.926404832 | 0.945635685 |
| POU3F3    | 0.004875044  | 0.926455605 | 0.945639043 |
| STAG3     | -0.0048629   | 0.926638281 | 0.945777028 |
| NCF1      | 0.004854231  | 0.926768702 | 0.945861667 |
| MMP13     | 0.004836289  | 0.927038616 | 0.946046838 |
| C16orf89  | -0.004835855 | 0.927045144 | 0.946046838 |
| ASB4      | 0.004787118  | 0.927778399 | 0.946732978 |
| SPTLC3    | -0.004784846 | 0.92781258  | 0.946732978 |
| ZNF451    | -0.004776782 | 0.927933903 | 0.946808263 |
| CLDN5     | 0.004735888  | 0.928549211 | 0.947387547 |
| GML       | -0.004724354 | 0.928722769 | 0.947516084 |
| OR6B3     | 0.004717934  | 0.928819376 | 0.947566102 |
| GDPD5     | -0.004692351 | 0.929204326 | 0.947910263 |
| HOTAIR    | -0.004678581 | 0.929411547 | 0.948073091 |
| LOC100192 | -0.004666358 | 0.929595488 | 0.948212156 |
| C3orf55   | 0.004656733  | 0.929740328 | 0.948307573 |
| ZNF350    | 0.004653813  | 0.929784267 | 0.948307573 |
| TRYX3     | 0.00464286   | 0.929949097 | 0.948386664 |
| FLJ43859  | -0.004642332 | 0.929957056 | 0.948386664 |
| ST14      | -0.004630627 | 0.930133195 | 0.948475022 |
| ELMO3     | -0.004630245 | 0.93013895  | 0.948475022 |
| LECT2     | 0.004624674  | 0.93022279  | 0.948511948 |
| LOC96610  | 0.004609535  | 0.930450639 | 0.948695703 |
| LOC100216 | 0.004566095  | 0.931104422 | 0.949313703 |
| RASAL3    | 0.004552604  | 0.93130749  | 0.949472134 |
| PRMT6     | -0.004543418 | 0.931445751 | 0.94956448  |
| DCDC2     | -0.004524898 | 0.931724505 | 0.949800037 |
| KRTAP5-4  | 0.004516567  | 0.931849904 | 0.949879247 |
| SHC3      | -0.00450176  | 0.932072792 | 0.950057818 |
| EGF       | 0.004496145  | 0.932157321 | 0.950092707 |
| NCRNA0017 | -0.004493147 | 0.932202435 | 0.950092707 |
| C19orf54  | -0.004485402 | 0.932319028 | 0.950162911 |
| PCIF1     | 0.004459466  | 0.932709445 | 0.950512158 |
| PNP       | -0.004455914 | 0.932762922 | 0.950518016 |
| HOXD12    | 0.00444613   | 0.932910207 | 0.950525035 |
| ZNRF3     | -0.004443075 | 0.932956195 | 0.950525035 |
| TNFSF4    | -0.004442387 | 0.932966552 | 0.950525035 |
| KCNA10    | 0.004440871  | 0.932989374 | 0.950525035 |
| TNFRSF10C | -0.004439604 | 0.933008455 | 0.950525035 |

|           |              |             |             |
|-----------|--------------|-------------|-------------|
| PAPL      | -0.004426881 | 0.933199985 | 0.950645574 |
| ALPK2     | -0.004425403 | 0.933222243 | 0.950645574 |
| HNRNPH3   | 0.004405563  | 0.93352092  | 0.950901188 |
| PNO1      | -0.004374173 | 0.933993515 | 0.951305867 |
| PTGER1    | 0.00437283   | 0.934013739 | 0.951305867 |
| AVPR1B    | 0.004367453  | 0.934094687 | 0.951339658 |
| SLC35E4   | 0.004362016  | 0.93417655  | 0.95137438  |
| WIPI1     | -0.004339665 | 0.934513064 | 0.951501505 |
| KRT85     | 0.004339032  | 0.9345226   | 0.951501505 |
| C14orf176 | 0.004335894  | 0.934569851 | 0.951501505 |
| GP2       | 0.004335621  | 0.934573957 | 0.951501505 |
| C6orf103  | 0.004333483  | 0.93460615  | 0.951501505 |
| ZNRF4     | -0.004332313 | 0.934623763 | 0.951501505 |
| OSCP1     | 0.004331512  | 0.934635824 | 0.951501505 |
| SERPINC1  | -0.00430702  | 0.935004603 | 0.951828281 |
| ZNF229    | -0.004302387 | 0.935074358 | 0.951850636 |
| UNC93A    | 0.004286945  | 0.935306876 | 0.952038662 |
| OSGEPL1   | 0.004283079  | 0.935365095 | 0.952049262 |
| LOC284100 | -0.004273195 | 0.935513929 | 0.952131413 |
| MAP2K6    | -0.004270192 | 0.935559152 | 0.952131413 |
| UNC5D     | -0.004268194 | 0.935589235 | 0.952131413 |
| FAM197Y2  | 0.004250517  | 0.935855426 | 0.952353643 |
| PRG2      | 0.004243331  | 0.935963639 | 0.952415097 |
| HAS2AS    | -0.004224812 | 0.936242516 | 0.9526502   |
| SH3RF2    | -0.004205689 | 0.936530489 | 0.952894533 |
| OR2J3     | -0.004193333 | 0.936716576 | 0.952985652 |
| LRRC50    | 0.004191974  | 0.936737034 | 0.952985652 |
| TRAF5     | 0.00419021   | 0.936763601 | 0.952985652 |
| ZNF204P   | -0.004167207 | 0.937110031 | 0.953289383 |
| FAM9A     | -0.004162457 | 0.937181563 | 0.953313455 |
| TCEAL5    | -0.004136225 | 0.937576649 | 0.95366663  |
| ARL17A    | 0.004131456  | 0.937648479 | 0.953690984 |
| C4orf39   | -0.004116283 | 0.937877    | 0.953836323 |
| ARHGDI B  | -0.004115608 | 0.937887165 | 0.953836323 |
| CNKSR1    | 0.00408817   | 0.938300437 | 0.954207895 |
| PRG1      | -0.004083021 | 0.938377996 | 0.954238041 |
| RFC3      | 0.004075703  | 0.938488221 | 0.9543014   |
| MYL2      | 0.004055858  | 0.938787132 | 0.954556608 |
| LRRC14B   | 0.004023623  | 0.939272701 | 0.955001574 |
| WDR87     | 0.004009062  | 0.939492043 | 0.955175824 |
| PCDHB1    | -0.004004212 | 0.939565113 | 0.955201349 |
| IL26      | 0.003996572  | 0.939680198 | 0.955226496 |
| HCCS      | 0.003996202  | 0.939685779 | 0.955226496 |
| KRT14     | 0.003981666  | 0.939904742 | 0.955378829 |
| GRASP     | -0.003979885 | 0.939931579 | 0.955378829 |
| SLC20A1   | 0.003950065  | 0.940380807 | 0.955786658 |

|           |              |             |             |
|-----------|--------------|-------------|-------------|
| OR5B21    | -0.003927694 | 0.940717839 | 0.956065202 |
| MICB      | 0.00392224   | 0.940800003 | 0.956065202 |
| C1orf68   | 0.003921621  | 0.940809333 | 0.956065202 |
| HSD17B7P2 | 0.003919128  | 0.940846891 | 0.956065202 |
| C20orf144 | -0.003909759 | 0.940988043 | 0.956159849 |
| GORASP2   | 0.003899466  | 0.941143126 | 0.95626864  |
| CPNE6     | -0.003862789 | 0.941695727 | 0.956742982 |
| BSX       | -0.003862104 | 0.941706047 | 0.956742982 |
| SLURP1    | -0.003849875 | 0.941890299 | 0.956801615 |
| WAS       | -0.003849116 | 0.941901733 | 0.956801615 |
| KCNH8     | 0.003848708  | 0.941907891 | 0.956801615 |
| CCDC110   | 0.003837115  | 0.942082565 | 0.956930239 |
| SP8       | -0.003833392 | 0.942138664 | 0.95693329  |
| CHRNA5    | -0.003830538 | 0.94218167  | 0.95693329  |
| CORO6     | 0.003800694  | 0.942631355 | 0.957341192 |
| FOXD3     | 0.003735465  | 0.943614294 | 0.9582906   |
| MAT1A     | 0.003730626  | 0.943687214 | 0.958315785 |
| TPSAB1    | -0.003720916 | 0.943833534 | 0.958415502 |
| C20orf173 | 0.003701541  | 0.94412552  | 0.958663118 |
| SLC4A1AP  | -0.003649073 | 0.944916258 | 0.959417114 |
| TNFRSF21  | -0.003634148 | 0.945141208 | 0.95955126  |
| GALNT13   | -0.003633913 | 0.945144741 | 0.95955126  |
| FAM131A   | 0.003616447  | 0.945407985 | 0.959769589 |
| HAVCR1    | 0.003600536  | 0.945647797 | 0.959964109 |
| LOC442308 | -0.003592045 | 0.945775782 | 0.960045094 |
| TTC9B     | 0.003587013  | 0.945851622 | 0.960069264 |
| ULK4      | 0.003584068  | 0.945896009 | 0.960069264 |
| LOC643763 | -0.003568838 | 0.94612558  | 0.960253334 |
| GPR151    | 0.003563285  | 0.946209279 | 0.960253591 |
| HEATR2    | 0.003562423  | 0.946222268 | 0.960253591 |
| CYMP      | -0.003539357 | 0.946569943 | 0.960557473 |
| TFPI      | -0.003534119 | 0.946648897 | 0.960588647 |
| HRASLS    | -0.003529201 | 0.94672304  | 0.960594675 |
| TYMP      | 0.003527325  | 0.946751308 | 0.960594675 |
| LOC100192 | 0.003501826  | 0.94713568  | 0.960935711 |
| HEPACAM2  | -0.003484181 | 0.947401672 | 0.961156612 |
| ZNF252    | -0.003474718 | 0.947544325 | 0.961252367 |
| SLC6A13   | -0.003466585 | 0.94766693  | 0.961327777 |
| SNORA28   | 0.003458472  | 0.947789227 | 0.961402865 |
| MAP7D2    | -0.003446778 | 0.94796551  | 0.961532706 |
| EDDM3B    | 0.003425457  | 0.948286943 | 0.961809752 |
| SRPK3     | 0.00339404   | 0.948760585 | 0.962241141 |
| CIB4      | -0.003368456 | 0.949146301 | 0.962583316 |
| STX3      | -0.00335294  | 0.949380229 | 0.962742416 |
| KATNB1    | -0.003351637 | 0.949399864 | 0.962742416 |
| RNF112    | 0.003343431  | 0.949523586 | 0.96281885  |

|           |              |             |             |
|-----------|--------------|-------------|-------------|
| HTR3C     | -0.003336356 | 0.949630264 | 0.962877996 |
| SYCP2L    | -0.003299509 | 0.950185825 | 0.963392257 |
| PARN      | -0.003286182 | 0.950386778 | 0.963546947 |
| SPATA8    | 0.003279157  | 0.950492701 | 0.963605281 |
| PRSS42    | -0.003252731 | 0.950891161 | 0.963960167 |
| 44078     | 0.003209508  | 0.951542919 | 0.964571782 |
| CCDC81    | -0.003156633 | 0.952340269 | 0.965330914 |
| TNFRSF8   | -0.003153065 | 0.952394089 | 0.965336333 |
| APOL5     | -0.00312323  | 0.952844013 | 0.965743219 |
| RBMXL2    | 0.003118496  | 0.952915402 | 0.965766424 |
| GBX1      | 0.003106433  | 0.95309733  | 0.965879812 |
| SLC30A2   | 0.0031024    | 0.953158148 | 0.965879812 |
| CRISP3    | 0.00310143   | 0.953172781 | 0.965879812 |
| CD48      | 0.003090014  | 0.95334495  | 0.966005122 |
| FRG2C     | -0.003080749 | 0.953484679 | 0.966097551 |
| C1orf14   | -0.003076836 | 0.953543705 | 0.966108206 |
| CDH12     | 0.003055695  | 0.953862539 | 0.966382076 |
| LOC730101 | -0.00301479  | 0.954479496 | 0.966957939 |
| MYH7B     | 0.003006786  | 0.954600221 | 0.967031049 |
| GPC2      | 0.002991049  | 0.954837573 | 0.967222292 |
| PTTG1IP   | -0.002986127 | 0.954911809 | 0.967248293 |
| SNORA44   | 0.002945902  | 0.955518556 | 0.967786646 |
| SNORA81   | 0.002944448  | 0.955540489 | 0.967786646 |
| GREB1     | 0.00287556   | 0.956579614 | 0.96878982  |
| CNBD1     | 0.002868688  | 0.956683276 | 0.968845535 |
| LGALS3    | 0.002856173  | 0.956872066 | 0.96898745  |
| RHOBTB1   | -0.002842368 | 0.95708033  | 0.969149071 |
| C8orf12   | 0.002838536  | 0.957138133 | 0.969158325 |
| DLX5      | -0.002829609 | 0.957272801 | 0.969245403 |
| NLRP13    | 0.002808465  | 0.957591777 | 0.969495603 |
| ICK       | 0.002806775  | 0.957617274 | 0.969495603 |
| CD79A     | -0.00279252  | 0.957832318 | 0.96966402  |
| DERA      | 0.002778386  | 0.958045554 | 0.969830591 |
| C3orf21   | -0.002759112 | 0.958336334 | 0.970075637 |
| PCNXL3    | -0.002740804 | 0.958612538 | 0.970305906 |
| KLRC1     | -0.00272897  | 0.958791086 | 0.970437309 |
| RAB40C    | 0.002718547  | 0.958948336 | 0.970547142 |
| ZKSCAN2   | 0.002709752  | 0.959081025 | 0.970632107 |
| CABP4     | -0.002699156 | 0.9592409   | 0.97067004  |
| ESCO2     | 0.002694392  | 0.959312769 | 0.97067004  |
| PDHA1     | 0.002694058  | 0.959317811 | 0.97067004  |
| LRP11     | 0.002691553  | 0.959355609 | 0.97067004  |
| ZC4H2     | 0.002691116  | 0.95936221  | 0.97067004  |
| FUT1      | -0.002676001 | 0.959590253 | 0.970851447 |
| ODF4      | -0.002668457 | 0.959704077 | 0.970917282 |
| ADAM3A    | 0.002660323  | 0.959826811 | 0.970992123 |

|           |              |             |             |
|-----------|--------------|-------------|-------------|
| UGT8      | 0.002652855  | 0.95993948  | 0.971056776 |
| NELF      | 0.002645671  | 0.960047883 | 0.971117106 |
| RAB3D     | -0.002619922 | 0.960436401 | 0.971460761 |
| ASS1      | -0.002614221 | 0.960522421 | 0.971498426 |
| QPCT      | 0.002579502  | 0.961046299 | 0.97192955  |
| LOC151534 | 0.002573905  | 0.96113075  | 0.97192955  |
| RTP1      | -0.00257307  | 0.961143339 | 0.97192955  |
| CHAC1     | 0.002573034  | 0.96114389  | 0.97192955  |
| TSIX      | 0.002552503  | 0.961453696 | 0.972188207 |
| TMEM59    | -0.002549612 | 0.961497309 | 0.972188207 |
| LAIR1     | 0.002542505  | 0.961604555 | 0.972247282 |
| POLA1     | -0.002527646 | 0.961828787 | 0.972424626 |
| SEPT7L    | -0.002521878 | 0.961915822 | 0.972463251 |
| TDRD3     | -0.002511755 | 0.962068575 | 0.972527    |
| C2orf70   | -0.002511227 | 0.962076547 | 0.972527    |
| KRTAP1-3  | 0.002500253  | 0.962242153 | 0.972644676 |
| LHFPL2    | 0.00249704   | 0.962290638 | 0.972644676 |
| LYSMD2    | -0.002485533 | 0.962464282 | 0.972766059 |
| LYNX1     | -0.002482608 | 0.96250842  | 0.972766059 |
| ZNF879    | -0.002461483 | 0.962827209 | 0.972987414 |
| HGD       | -0.002456914 | 0.962896158 | 0.972987414 |
| MAEL      | 0.002456202  | 0.96290691  | 0.972987414 |
| TGIF1     | 0.002455144  | 0.962922869 | 0.972987414 |
| C7orf25   | 0.002427732  | 0.963336547 | 0.973356029 |
| TYW3      | -0.002419998 | 0.963453264 | 0.973424572 |
| MYOD1     | 0.002413523  | 0.963550986 | 0.973436552 |
| CD8A      | -0.002412735 | 0.96356288  | 0.973436552 |
| FAM3D     | -0.002405497 | 0.963672116 | 0.973497524 |
| IPW       | 0.002380132  | 0.964054921 | 0.973834834 |
| SYCP3     | 0.002341374  | 0.964639853 | 0.974376276 |
| ATP6V1B1  | 0.00232735   | 0.964851517 | 0.974540648 |
| POMT2     | 0.002291043  | 0.965399491 | 0.975044673 |
| DSP       | 0.002279413  | 0.965575018 | 0.97514113  |
| NCF2      | 0.002278227  | 0.965592924 | 0.97514113  |
| QSOX1     | 0.002263203  | 0.965819685 | 0.975320675 |
| TRPM1     | 0.002243877  | 0.966111383 | 0.975565774 |
| GUCA1A    | -0.002227489 | 0.966358736 | 0.975747941 |
| OR13A1    | -0.002225433 | 0.966389776 | 0.975747941 |
| TPSD1     | 0.002213526  | 0.966569499 | 0.975879927 |
| C6orf10   | -0.002200767 | 0.966762083 | 0.976024885 |
| RGS13     | -0.002195667 | 0.966839072 | 0.976046681 |
| EPHB4     | -0.002189958 | 0.966925245 | 0.976046681 |
| FAM69C    | -0.002188023 | 0.966954453 | 0.976046681 |
| GSDMA     | 0.002186349  | 0.966979714 | 0.976046681 |
| TRIML2    | 0.002170505  | 0.967218868 | 0.976238597 |
| IMMP2L    | 0.002149829  | 0.967530971 | 0.976503335 |

|           |              |             |             |
|-----------|--------------|-------------|-------------|
| C10orf25  | 0.002146632  | 0.967579227 | 0.976503335 |
| CAP2      | -0.002137668 | 0.96771454  | 0.976590405 |
| UBE2D1    | -0.002130535 | 0.967822206 | 0.976649569 |
| ERN2      | 0.002118215  | 0.968008181 | 0.976783028 |
| KIR2DS4   | 0.002115275  | 0.968052555 | 0.976783028 |
| FFAR1     | -0.002110993 | 0.968117203 | 0.976798769 |
| LOC284233 | -0.00210553  | 0.968199667 | 0.976832483 |
| ATP6V0A4  | 0.002099631  | 0.968288704 | 0.976872824 |
| AGPAT6    | -0.002086089 | 0.968493133 | 0.977000562 |
| TP73      | -0.00208281  | 0.968542622 | 0.977000562 |
| FRAS1     | -0.00207626  | 0.968641502 | 0.977000562 |
| TTY6      | 0.002075237  | 0.968656955 | 0.977000562 |
| PDZK1IP1  | -0.002074994 | 0.968660612 | 0.977000562 |
| C21orf90  | 0.002069076  | 0.968749946 | 0.977041182 |
| PHF11     | 0.002052613  | 0.968998474 | 0.977206651 |
| GUSBP3    | -0.002051707 | 0.969012149 | 0.977206651 |
| PLTP      | -0.002045713 | 0.969102643 | 0.977248424 |
| CEBPE     | -0.002017851 | 0.969523243 | 0.977623058 |
| C17orf100 | -0.002013333 | 0.969591447 | 0.977642331 |
| EID3      | 0.002002814  | 0.969750246 | 0.977752944 |
| TRAF3IP3  | 0.001981012  | 0.970079387 | 0.977998477 |
| SPATS1    | -0.001980177 | 0.970091987 | 0.977998477 |
| CYBASC3   | -0.00195705  | 0.970441129 | 0.97830094  |
| SCNN1D    | 0.001952153  | 0.970515066 | 0.978325953 |
| CD1A      | -0.001944548 | 0.970629878 | 0.978392166 |
| GTF2H1    | 0.001940962  | 0.970684009 | 0.978397208 |
| ROPN1L    | 0.001934319  | 0.970784307 | 0.978448781 |
| OR10H2    | 0.001907461  | 0.97118979  | 0.978807929 |
| GMPR2     | -0.001879799 | 0.971607411 | 0.979179272 |
| PCDH15    | -0.001875523 | 0.971671976 | 0.979194788 |
| C14orf53  | -0.001859796 | 0.971909409 | 0.9793845   |
| GCDH      | -0.001855872 | 0.971968661 | 0.979394651 |
| TMEM139   | -0.001826908 | 0.972405959 | 0.979758345 |
| LOC90110  | 0.001825449  | 0.972427992 | 0.979758345 |
| ASPG      | 0.001811135  | 0.972644112 | 0.979849808 |
| GLT25D2   | -0.00180844  | 0.972684801 | 0.979849808 |
| HSPH1     | 0.001806488  | 0.972714274 | 0.979849808 |
| EPCAM     | -0.001806401 | 0.972715576 | 0.979849808 |
| LOC151009 | -0.001780898 | 0.973100647 | 0.980173827 |
| MT1M      | 0.001777675  | 0.973149302 | 0.980173827 |
| CD247     | -0.001775318 | 0.97318489  | 0.980173827 |
| IL17D     | -0.001769833 | 0.973267702 | 0.980207661 |
| PAX7      | -0.001755066 | 0.973490674 | 0.980382643 |
| CEACAM22  | -0.001747323 | 0.973607588 | 0.980450805 |
| CELF6     | -0.001742143 | 0.973685803 | 0.98047999  |
| SAMD11    | -0.001737985 | 0.973748572 | 0.980493619 |

|          |              |             |             |
|----------|--------------|-------------|-------------|
| MDH1     | 0.001713906  | 0.974112145 | 0.98081012  |
| C2orf51  | -0.001696037 | 0.974381966 | 0.981032197 |
| ADCK4    | 0.001632639  | 0.975339253 | 0.981946374 |
| FAM180B  | 0.001620574  | 0.975521441 | 0.982080149 |
| NEFH     | -0.001605999 | 0.975741532 | 0.982252066 |
| KIAA0125 | -0.001586673 | 0.976033348 | 0.982482794 |
| CDC42EP5 | 0.001584286  | 0.976069399 | 0.982482794 |
| PPAP2A   | 0.001580618  | 0.976124786 | 0.982488887 |
| TULP2    | -0.001543312 | 0.976688134 | 0.983006226 |
| LCE1D    | -0.001520929 | 0.977026135 | 0.983296719 |
| C8orf41  | 0.00151194   | 0.977161882 | 0.983340209 |
| FAM63A   | 0.001511528  | 0.977168101 | 0.983340209 |
| SUMF1    | -0.001507486 | 0.977229138 | 0.983351942 |
| LRRC10   | -0.001499746 | 0.977346018 | 0.983419864 |
| PTCHD3   | -0.001495964 | 0.977403136 | 0.983427649 |
| ZNF207   | 0.001467863  | 0.977827502 | 0.983804926 |
| MOCS2    | 0.0014603    | 0.977941707 | 0.983852503 |
| PYDC1    | -0.001458189 | 0.977973595 | 0.983852503 |
| NTNG2    | -0.001423565 | 0.978496469 | 0.984328796 |
| THUMPD3  | -0.00140001  | 0.978852193 | 0.984636904 |
| FDPSSL2A | -0.001395567 | 0.978919296 | 0.984654668 |
| RGS17    | -0.001390513 | 0.978995618 | 0.984681703 |
| RHAG     | 0.001366532  | 0.979357777 | 0.984958937 |
| ARPM1    | 0.001365712  | 0.979370167 | 0.984958937 |
| CALCB    | 0.001361186  | 0.979438523 | 0.984970972 |
| MPP7     | -0.001353469 | 0.979555067 | 0.984970972 |
| MMP27    | -0.001351701 | 0.979581759 | 0.984970972 |
| AREG     | -0.001351512 | 0.97958461  | 0.984970972 |
| ANKRD34B | -0.001348545 | 0.979629427 | 0.984970972 |
| FGF10    | -0.0013405   | 0.979750922 | 0.985043398 |
| OR8B8    | 0.001299353  | 0.980372345 | 0.985615259 |
| LRTM1    | -0.001296284 | 0.980418694 | 0.985615259 |
| GLT1D1   | -0.001276527 | 0.980717084 | 0.985857451 |
| VASN     | -0.001273777 | 0.980758615 | 0.985857451 |
| PLCD1    | -0.001267355 | 0.9808556   | 0.985905177 |
| KRT75    | 0.001259445  | 0.980975076 | 0.98593164  |
| C15orf38 | -0.001259056 | 0.980980941 | 0.98593164  |
| CTNNA2   | -0.001228451 | 0.981443179 | 0.986346432 |
| SETD4    | 0.001221333  | 0.981550686 | 0.986398814 |
| EDDM3A   | 0.001218441  | 0.981594361 | 0.986398814 |
| HNRNPCL1 | -0.001192077 | 0.981992536 | 0.986749148 |
| MTHFS    | 0.001171046  | 0.982310187 | 0.987018536 |
| C11orf70 | -0.001166579 | 0.982377649 | 0.98703652  |
| TDH      | -0.001152433 | 0.982591308 | 0.987201387 |
| PRDM15   | -0.00113895  | 0.982794947 | 0.987356171 |
| FAM167B  | 0.001134569  | 0.982861118 | 0.987372839 |

|           |              |             |             |
|-----------|--------------|-------------|-------------|
| UGT1A7    | -0.001126676 | 0.98298033  | 0.987442788 |
| FAM35A    | -0.00111461  | 0.983162577 | 0.987576048 |
| TAAR9     | 0.001104856  | 0.9833099   | 0.987674215 |
| CD300A    | 0.001087556  | 0.983571195 | 0.987867233 |
| TMEM212   | 0.001085565  | 0.983601274 | 0.987867233 |
| GLRA3     | 0.001068884  | 0.983853225 | 0.988070448 |
| C1orf116  | -0.001056342 | 0.984042657 | 0.988210858 |
| OR2AK2    | 0.001052115  | 0.984106507 | 0.988215511 |
| C17orf66  | 0.001049465  | 0.984146535 | 0.988215511 |
| TTC16     | -0.001041794 | 0.984262397 | 0.988282022 |
| ODF1      | -0.001036618 | 0.984340571 | 0.988310687 |
| CELA2B    | -0.001024686 | 0.984520801 | 0.988374639 |
| BATF2     | 0.00102263   | 0.984551847 | 0.988374639 |
| INTS7     | -0.001022544 | 0.984553155 | 0.988374639 |
| C22orf24  | -0.000970341 | 0.985341658 | 0.989105319 |
| PNPO      | -0.00096778  | 0.985380343 | 0.989105319 |
| CCL3L3    | -0.000948275 | 0.985674963 | 0.989351186 |
| FAM9C     | 0.000926735  | 0.986000315 | 0.989627874 |
| ATP6V0D2  | 0.000886899  | 0.986602032 | 0.990181902 |
| PHF15     | 0.000872513  | 0.986819335 | 0.990350083 |
| AEN       | 0.000866496  | 0.986910227 | 0.990391391 |
| LOC339788 | 0.000852659  | 0.987119239 | 0.99050915  |
| POTEA     | -0.000852142 | 0.987127045 | 0.99050915  |
| C1orf146  | 0.000841025  | 0.987294976 | 0.990607656 |
| PCNAP1    | 0.000839057  | 0.987324698 | 0.990607656 |
| ANO2      | -0.000818949 | 0.987628447 | 0.990862494 |
| LOC441455 | 0.000806368  | 0.987818491 | 0.991003236 |
| C3orf30   | 0.000790623  | 0.988056322 | 0.991191903 |
| LOC391322 | 0.000784224  | 0.988152976 | 0.991238932 |
| ZNF645    | -0.000753168 | 0.988622109 | 0.99165958  |
| TMEM170B  | 0.000742273  | 0.988786677 | 0.991734129 |
| ADORA2B   | 0.000739343  | 0.988830939 | 0.991734129 |
| C22orf34  | 0.000735433  | 0.988890003 | 0.991734129 |
| OSBP2     | -0.000735061 | 0.988895623 | 0.991734129 |
| ZMYND15   | 0.000711033  | 0.989258587 | 0.992048178 |
| LELP1     | 0.00068775   | 0.989610288 | 0.992350901 |
| PDZK1P1   | 0.00068271   | 0.989686424 | 0.992377278 |
| LCT       | -0.000662553 | 0.989990917 | 0.992632621 |
| NLRP4     | 0.000651655  | 0.99015555  | 0.992747711 |
| MUCL1     | -0.00063972  | 0.990335841 | 0.992878487 |
| BCAT1     | -0.000627126 | 0.990526089 | 0.993017484 |
| TSPAN15   | 0.000620548  | 0.990625454 | 0.993017484 |
| DNER      | -0.000619336 | 0.990643766 | 0.993017484 |
| C11orf92  | 0.000616654  | 0.990684271 | 0.993017484 |
| VWC2L     | -0.000614038 | 0.990723796 | 0.993017484 |
| ZNF552    | 0.000587386  | 0.991126399 | 0.993371024 |



|           |              |             |             |
|-----------|--------------|-------------|-------------|
| STAMPB    | 0.000583108  | 0.991191037 | 0.993385813 |
| SI        | 0.00056897   | 0.991404605 | 0.993514105 |
| ZNF213    | -0.000568029 | 0.99141882  | 0.993514105 |
| SPINT1    | 0.000562368  | 0.991504344 | 0.993549814 |
| GSTZ1     | 0.000550898  | 0.991677602 | 0.993602532 |
| SLC6A16   | -0.000549351 | 0.991700975 | 0.993602532 |
| ZNF613    | 0.000547975  | 0.991721762 | 0.993602532 |
| IDO1      | -0.000545674 | 0.991756522 | 0.993602532 |
| PF4V1     | 0.000524256  | 0.992080068 | 0.993876681 |
| IAPP      | -0.000497982 | 0.992476977 | 0.994224296 |
| OR5M10    | -0.000466463 | 0.992953128 | 0.994640994 |
| C13orf29  | -0.000463835 | 0.992992832 | 0.994640994 |
| FAM75A6   | 0.000441985  | 0.993322905 | 0.994921574 |
| C6orf164  | -0.000420282 | 0.993650766 | 0.995190873 |
| HELT      | -0.000417572 | 0.993691715 | 0.995190873 |
| RFPL1S    | 0.000413275  | 0.993756625 | 0.995205832 |
| C20orf103 | 0.000403219  | 0.993908532 | 0.99530791  |
| CRYZL1    | -0.000371282 | 0.994391011 | 0.995740998 |
| SELPLG    | -0.000351412 | 0.994691183 | 0.995991499 |
| SLC18A3   | 0.000338418  | 0.994887483 | 0.99613797  |
| C14orf169 | 0.000315026  | 0.995240865 | 0.996441698 |
| TXNDC3    | 0.000305686  | 0.99538195  | 0.996532854 |
| C7orf16   | -0.000293888 | 0.995560182 | 0.996661189 |
| SCYL1     | 0.000277221  | 0.995811977 | 0.99686315  |
| KRT4      | 0.000269866  | 0.995923088 | 0.996924268 |
| CNTNAP5   | 0.000244818  | 0.996301496 | 0.997248435 |
| VHLL      | 0.0002418    | 0.996347081 | 0.997248435 |
| LOC202781 | 0.000228715  | 0.996544766 | 0.997389776 |
| PGRMC2    | -0.000223165 | 0.996628599 | 0.997389776 |
| C1orf100  | 0.000221095  | 0.996659874 | 0.997389776 |
| LOC253724 | 0.000219192  | 0.996688623 | 0.997389776 |
| WASF2     | -0.000210888 | 0.99681407  | 0.99746519  |
| FLJ39739  | -0.000178588 | 0.997302031 | 0.997903329 |
| GABRA4    | -0.000175254 | 0.997352396 | 0.997903586 |
| CCNJL     | 0.000161626  | 0.99755829  | 0.998059449 |
| ZNF277    | 0.000151432  | 0.997712283 | 0.998163374 |
| ZNF671    | 0.000143841  | 0.997826967 | 0.998227963 |
| TSG1      | 0.000132475  | 0.997998674 | 0.998349588 |
| SALL2     | -0.00011856  | 0.998208882 | 0.998485307 |
| OR1F1     | -0.000116857 | 0.99823462  | 0.998485307 |
| OCA2      | 0.000102011  | 0.998458894 | 0.998659478 |
| TBX1      | 8.71279E-05  | 0.99868374  | 0.998834204 |
| TMEM182   | -6.29074E-05 | 0.999049644 | 0.999149985 |
| KIAA1486  | -2.37036E-05 | 0.999641904 | 0.999664576 |
| SGCZ      | 2.22029E-05  | 0.999664576 | 0.999664576 |
